# Supplementary material for: Amine adducts of triallylborane as highly reactive allylborating agents for Cu(i)-catalyzed allylation of chiral sulfinylimines
Source: Royal Society of Chemistry journal article supplement (doi:10.1039/d4ob00291a), 2024-01-01
Supplement: d4ob00291a2.pdf [file d4ob00291a2.pdf]

## Amine Adducts of Triallylborane As Highly Reactive Allylborating Agents For Cu(I)-Catalyzed Allylation of Chiral Sulfinylimines

Michael S. Alexeev,<sup>a,b</sup> Tatiana V. Strelkova,<sup>a</sup> Michael M. Ilyin,<sup>a</sup> Yulia V. Nelyubina,<sup>a</sup> Ivan A. Bespalov,<sup>c,d</sup>  
Michael G. Medvedev,<sup>a,c</sup> Victor N. Khrustalev<sup>c,e</sup> and Nikolai Yu. Kuznetsov<sup>a,b\*</sup>

<sup>a</sup> A.N. Nesmeyanov Institute of Organoelement compounds, Russian Academy of Sciences,  
Vavilov st. 28, 119991 Moscow, Russian Federation, e-mail: [nkuznff@ineos.ac.ru](mailto:nkuznff@ineos.ac.ru)

<sup>b</sup> A.V. Topchiev Institute of Petrochemical Synthesis, Russian Academy of Sciences, Leninsky  
Prospect 29, 119991 Moscow, Russian Federation

<sup>c</sup> N.D. Zelinsky Institute of Organic Chemistry, Russian Academy of Sciences, Leninsky Prospect  
29, 119991 Moscow, Russian Federation

<sup>d</sup> Lomonosov Moscow State University, Leninskie Gory 1 (3), Moscow, 119991, Russian  
Federation

<sup>e</sup> Peoples Friendship University of Russia, Miklukho–Maklay st. 6, 117198 Moscow, Russian  
Federation

### Supporting Information

#### Table of content

|                                                                                                                                      |           |
|--------------------------------------------------------------------------------------------------------------------------------------|-----------|
| General information                                                                                                                  | S2        |
| Experimental procedures for synthesis of compounds <b>1f</b> , <b>4</b> , <b>5</b>                                                   | S3-S4     |
| Experimental procedures for synthesis of Cu-complexes [Cu-1] – [Cu-9]                                                                | S4-S7     |
| Procedure of determination of reaction rate constants                                                                                | S7-S8     |
| Optimization of the yield and diastereoselectivity of Ellman's imine allylation                                                      | S9        |
| Procedure for synthesis of Ellman's imines <b>2a-w</b>                                                                               | S10-S17   |
| Procedure for allylation of Ellman's imines <b>2a-w</b> and synthesis of <b>3a-w</b>                                                 | S17-S29   |
| Modified procedure for allylation of Ellman's imines <b>2t,u</b>                                                                     | S29-S30   |
| Gram-Scale Allylation of Salicylic imine <b>2q</b> for synthesis of <b>7</b>                                                         | S30-S31   |
| General procedure for synthesis of <i>N</i> -Boc-amides for chiral HPLC analysis                                                     | S32       |
| General procedure for synthesis of racemic <i>N</i> -Boc-homoallylamides <b>6a-w</b> as HPLC standards                               | S32-S40   |
| Quantum-chemical calculations                                                                                                        | S41-S42   |
| X-Ray crystallography general view of <b>1b</b> , <b>1d</b> , <b>3u</b> , [Cu-2], [Cu-5]                                             | S43-S44   |
| X-Ray crystallography experimental section                                                                                           | S45-S46   |
| References                                                                                                                           | S47       |
| Copies of <sup>1</sup> H/ <sup>13</sup> C/ <sup>11</sup> B spectra of <b>4</b> , <b>1f</b> , <b>5</b>                                | S48-S56   |
| Copies of <sup>1</sup> H/ <sup>13</sup> C/ <sup>31</sup> P/ <sup>19</sup> F/ <sup>11</sup> B spectra of Cu-complexes [Cu-1] – [Cu-9] | S57-S78   |
| Copies of <sup>1</sup> H/ <sup>13</sup> C spectra of Ellman's imines <b>2a-w</b>                                                     | S79-S108  |
| Copies of <sup>1</sup> H/ <sup>13</sup> C spectra of homoallylamines <b>3a-w</b>                                                     | S109-S147 |
| Copies of <sup>1</sup> H/ <sup>13</sup> C spectra of Boc-homoallylamines <b>6a-w</b>                                                 | S148-S181 |
| Copies of <sup>1</sup> H/ <sup>13</sup> C, COSY-H,H and HSQC spectra of diol <b>7</b>                                                | S182-S185 |
| Copies of UV-Vis spectra of Cu-complexes [Cu-1] – [Cu-9]                                                                             | S186-S194 |
| Copies of UV-Vis spectra of Ellman's imines <b>2a-2w</b>                                                                             | S195-S217 |
| Copies of UV-Vis spectra of homoallylamines <b>3a-3w</b>                                                                             | S218-S240 |
| Copies of UV-Vis spectra of <i>N</i> -Boc-homoallylamides <b>6a-w</b>                                                                | S241-S263 |
| Copies of Chiral HPLC chromatograms                                                                                                  | S264-S284 |
| Copies of rate constant determination tables and plots                                                                               | S285-S341 |

**General.** All manipulations with sensitive to air compounds were carried out under inert atmosphere of dry Ar by Schlenk technique<sup>1</sup>. NMR spectra were recorded on Bruker Avance 400, Varian Inova 400, and Bruker Avance 300 instruments. UV-Vis spectra were recorded on Shimadzu UV-1800 scanning double beam spectrophotometer with quartz cuvettes with an optical path length of 1.00 cm. Column chromatography was carried out using silica gel 60–230 mesh (Merck) and automated flash chromatograph Biotage Isolera Prime (UV detector) with silica loaded cartridges Varian SuperFlash SF-15 and Buchi GraceResolve. Thin layer chromatography was run on Alugram SilG/UV<sub>254</sub> (Macherey-Nagel) or TLC Silica gel 60 F<sub>254</sub> (Merck). Preparative thin layer chromatography was run on PTLC Silica gel 60 F<sub>254</sub> 0.5 mm (Merck). Visualization of spots on TLC plate was accomplished with UV light or by staining in I<sub>2</sub> chamber, and after removing of I<sub>2</sub> by heat gun TLC plate was immersed in KMnO<sub>4</sub> solution. Melting points were measured on a Stuart SMP10 (uncorrected) and Büchi B-540 (corrected) capillary melting point apparatus. All melting points were determined in opened capillary tubes. Optical rotation was measured on Perkin Elmer 341 polarimeter. Elemental analyses were conducted in laboratory of microanalysis of INEOS RAS. HPLC analysis was run on chiral columns Kromasil 5-TBB; Kromasil 3-AmyCoat; Chiracel OD-H; Chiralpak AS-H and ASTEC ChiraleDEX. Solutions for kinetic experiments were thermostated by Fisher Isotemp 1013s thermostat. Slow addition of alcohol solution was run by NE-300 Just Infusion<sup>TM</sup> Syringe Pump.

**Reagents and solvents.** All reagents and solvents if it not stated are commercially available and used without any treatment. Triallylborane was synthesized by procedure.<sup>2</sup> Amine adducts of triallylborane were prepared as earlier described.<sup>3,4</sup> Ellman's imines were synthesized by modified procedure.<sup>5</sup> Racemic homoallylamines were synthesized as earlier described.<sup>6</sup> Potassium *tert*-butoxide (Acros Organics<sup>®</sup>) was sublimated at T = 173 °C (0.76 Torr). Cuprous(I) chloride was prepared by literature procedure.<sup>7</sup> Copper(II) fluoride dihydrate was obtained by described method.<sup>8</sup> 1,3-*bis*(2,4,6-Trimethylphenyl)imidazolium chloride was synthesized as described.<sup>9</sup> (MesCu)<sub>5</sub>\*PhMe was synthesized by described procedure.<sup>10</sup> Acetonitrile HPLC (Baker<sup>®</sup>) was degassed under Ar atmosphere for synthesis of CuCl complexes. THF was freshly distilled over LAH. Anhydrous *i*PrOH HPLC (Scharlau<sup>®</sup>) was degassed under Ar atmosphere for measuring of allylation reaction rate constants.

### Synthesis of diallyl(isopropoxy)borane (**4**).

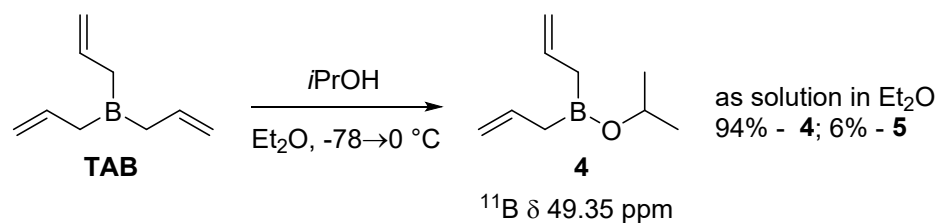

To a solution of triallylborane (1.37 g/1.76 ml, 10.2 mmol) in Et<sub>2</sub>O (15 ml) under Ar atmosphere at -78 °C was added dropwise a solution of *i*PrOH (0.601g/0.765 ml, 10 mmol) in Et<sub>2</sub>O (1 ml) and the mixture was stirred for 10 min followed by gradual warming of the reaction solution to 0 °C to give ethereal solution of **4**. Consistency and purity of **4** in the ethereal solution was confirmed by <sup>11</sup>B NMR (128 MHz, Et<sub>2</sub>O): δ 49.35 ppm.

### Preparation of methylamine adduct of diallyl(isopropoxy)borane (**1f**).

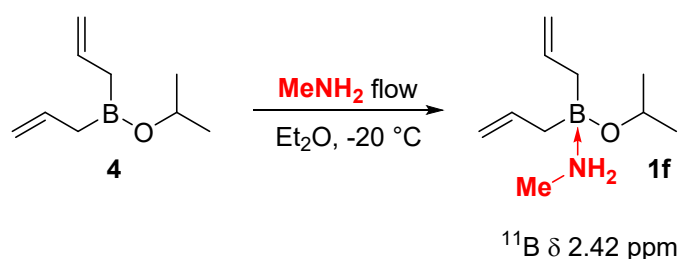

Through the ethereal solution of borinane **4** chilled to -20 °C a flow of dry methylamine was passed for 15 min, after then the volatiles were removed under reduced pressure of water-jet pump (15 mmHg) to give crude **1f** (1.75 g, 96%) as a white solid, melting below 0 °C. For the use in the kinetics study crude **1f** was recrystallized from *n*-pentane at -23 °C and stored at this temperature. Upon dissolution in the neat *i*PrOH at 25 °C **1f** is decomposed on 40% for 15 min, however addition of (~2 equiv.) of methylamine (as 6M sol. in *i*PrOH) to **1f** stabilizes the adduct, giving satisfactory NMR spectra in C<sub>6</sub>D<sub>6</sub>. There are shown several NMR spectra of **1f** (the same solution of **1f** with and without MeNH<sub>2</sub> additive) to demonstrate dynamic behavior of the adduct and the stabilization effect of methylamine additive. Signals of MeNH<sub>2</sub> and *i*PrOH are overlapping with signals of the corresponding groups in **1f**. <sup>1</sup>H NMR (400 MHz, C<sub>6</sub>D<sub>6</sub> with 2 equiv. of MeNH<sub>2</sub> in *i*PrOH): δ 6.18 (ddd, *J* = 22.1, 15.2, 8.2 Hz, 2H, CH=); 4.89 (d, *J* = 12.3 Hz, 4H, CH<sub>2</sub>=); 3.97–3.77 (m, 1H, OCH); 1.94 (s, 3H, Me); 1.43 (d, *J* = 7.8 Hz, 4H, CH<sub>2</sub>B); 1.14 (d, *J* = 6.3 Hz, 6H, Me<sub>2</sub>CHO) ppm. Overlapping signals are given in bold, <sup>13</sup>C NMR (101 MHz, C<sub>6</sub>D<sub>6</sub> with 2 equiv. of MeNH<sub>2</sub> in *i*PrOH): δ 143.2 (2C), 110.6 (2C), **63.3**, 29.2 (2C, br., CH<sub>2</sub>B), **27.0**, **25.7** (2C) ppm. <sup>11</sup>B NMR (128 MHz, C<sub>6</sub>D<sub>6</sub> with 2 equiv. of MeNH<sub>2</sub> in *i*PrOH): δ 2.42 ppm.

### Synthesis of allyl(diisopropoxy)borane (**5**)

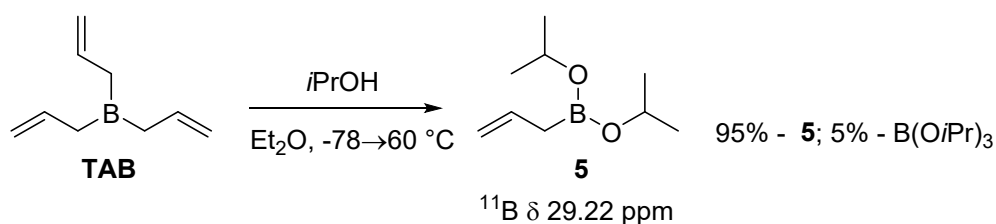

To a solution of **TAB** (3.87 g, 5.0 ml, 29.0 mmol) in Et<sub>2</sub>O (10 ml) cooled to -78 °C under Ar was added dropwise a solution of *i*PrOH (4.17 g, 5.31 ml, 69.6 mmol) in Et<sub>2</sub>O (5 ml). The mixture was stirred at this temperature for 30 min then it was allowed to warm to rt and the solution was left for 16 h. Then ether was distilled off under gentle heating on an oil bath and the residue consisting of borinane **4** and boronate **5** were heated up to 60 °C for 30 min. A progress of the reaction was monitored by <sup>11</sup>B NMR until disappearance of **4**. Then mixture was distilled under reduced pressure of water-jet pump to give boronate **5** (3.6 g, 73%) as colorless liquid, b.p. 50 °C (15 mmHg) with admixture of B(O*i*Pr)<sub>3</sub>. <sup>1</sup>H NMR (400 MHz, CDCl<sub>3</sub>): δ 5.88 (ddt, *J* = 17.3, 10.1, 7.4 Hz, 1H, CH=), 4.99–4.78 (m, 2H, CH<sub>2</sub>=), 4.38 (spt, *J* = 6.2 Hz, 2H, 2OCHMe<sub>2</sub>), 1.68 (d, *J* = 7.5 Hz, 2H, CH<sub>2</sub>B), 1.14 (d, *J* = 6.3 Hz, 12H, 2OCHMe<sub>2</sub>) ppm. <sup>13</sup>C NMR (101 MHz, CDCl<sub>3</sub>): δ 135.9, 113.9, 65.4, 24.6, 20.7 (br., CH<sub>2</sub>B) ppm. <sup>11</sup>B (128 MHz, CDCl<sub>3</sub>) δ 29.22 ppm.

**Spectral data coincide with the literature<sup>11</sup>.**

### Synthesis of copper(I) complexes

#### Synthesis of *tris*(triphenylphosphine)copper(I)fluoride\*2ethanol [**Cu-1**]

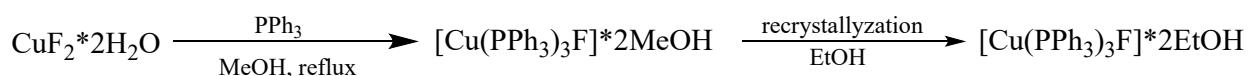

Copper(II) fluoride dihydrate (0.69 g, 5 mmol) was mixed with PPh<sub>3</sub> (4.59 g, 17.5 mmol, 3.5 equiv.) in MeOH (50 ml), and the suspension was heated at reflux for 2 hours. The mixture was cooled down to room temperature and filtrated through the pad of Celite®. The filtrate was evaporated to volume approx. 20 ml, and left in refrigerator. The precipitated crystals were filtered off and recrystallized twice from hot ethanol that furnished [**Cu-1**] (1.87 g, 39%) as colorless crystals, m.p. 167-169 °C (ethanol). <sup>1</sup>H NMR (CDCl<sub>3</sub>, 400 MHz): δ 7.38-7.30 (m, 27H, Ph), 7.26-7.21 (m, 18H, Ph), 3.72 (q, 4H, *J* = 9.4 Hz, CH<sub>3</sub>CH<sub>2</sub>OH), 2.48 (br.s, 2H, CH<sub>3</sub>CH<sub>2</sub>OH), 1.25 (t, 6H, *J* = 9.3 Hz, CH<sub>3</sub>CH<sub>2</sub>OH) ppm. <sup>31</sup>P NMR (CDCl<sub>3</sub>, 121 MHz): δ -3.97 ppm. UV spectrum λ, nm (ε, cm<sup>-1</sup>M<sup>-1</sup>): 260 (30600). **NMR spectra coincide with the literature data<sup>12</sup>.**

### Synthesis of *bis*(triphenylphosphine)-copper(I)-*bis*( $\mu_2$ -ethoxy)-difluoroborate [Cu-2]

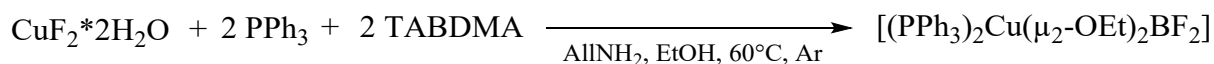

To copper(II) fluoride dihydrate (0.20 g, 1.45 mmol) abs. ethanol (12 ml), allylamine (2 ml) were added under Ar atm. and the mixture was heated up to 60 °C. PPh<sub>3</sub> (0.76 g, 2.9 mmol) and TABDMA **1c** (0.52 g, 2.9 mmol) were added to the formed dark-blue solution that led to gradual change of the color to yellow during 15 minutes with simultaneous evolution of propylene gas. The solution was centrifuged from unreacted CuF<sub>2</sub> followed by the evaporation of volatiles under reduced pressure. In order to remove impurity of allylamine the solution was evaporated trice with ethanol. The formed oil was recrystallized from hot ethanol to give [Cu-2] (0.47 g, 45%) as beige crystals, m.p. 183-184 °C dec. (ethanol). Due to the dynamic behavior of [(EtO)<sub>2</sub>BF<sub>2</sub>]<sup>-</sup> in CDCl<sub>3</sub> solution <sup>1</sup>H NMR spectrum contains two different signals in 1:3 ratio. <sup>1</sup>H NMR (400 MHz, CDCl<sub>3</sub>)  $\delta$  7.38–7.23 (m, 30H, Ar), 3.71 and 3.61 (both q, 4H,  $J = 7.0$  Hz, OCH<sub>2</sub>CH<sub>3</sub>), 1.24 and 0.82 (both t, 6H,  $J = 7.0$  Hz, OCH<sub>2</sub>CH<sub>3</sub>) ppm. <sup>13</sup>C NMR (101 MHz, CDCl<sub>3</sub>)  $\delta$  133.9, 132.8 (br.), 130.0, 128.7, 57.5, 18.2 ppm. <sup>31</sup>P NMR (121 MHz, CDCl<sub>3</sub>)  $\delta$  -3.21 ppm. <sup>11</sup>B NMR spectrum contains two signals in 8:1 ratio. <sup>11</sup>B NMR (128 MHz, CDCl<sub>3</sub>)  $\delta$  1.59 and 0.37 (both t,  $J = 27.3$  Hz) ppm. <sup>19</sup>F NMR contains two signals in 1:3 ratio, <sup>19</sup>F NMR (282 MHz, CDCl<sub>3</sub>)  $\delta$  -151.96 (br.), -156.06 (br.) ppm. UV spectrum  $\lambda$ , nm ( $\epsilon$ , cm<sup>-1</sup>M<sup>-1</sup>): 260 (21900). Anal. Calcd. for C<sub>40</sub>H<sub>40</sub>BCuF<sub>2</sub>O<sub>2</sub>P<sub>2</sub> (727.06): C, 66.08; H, 5.55; Cu, 8.74; found: C, 66.11; H, 5.64; Cu, 8.50.

### Synthesis of [1,3-*bis*(2,4,6-trimethylphenyl)-2-imidazolidinylidene]copper(I)chloride [Cu-4]

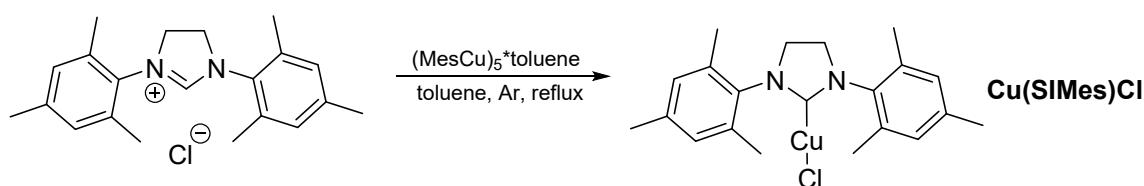

To a mixture of imidazolium salt (0.20 g, 0.58 mmol) in degassed toluene (2 ml) was added (MesCu)<sub>5</sub>\*PhMe (0.12 g, 0.116 mmol) and the mixture was stirred under reflux for 30 min. The resulting solution was filtered; the filtrate was evaporated to dryness under reduced pressure. The solid was taken up in DCM, passed through the pad of SuperCel Hyflo, evaporated and the residue was recrystallized from a mixture DCM/*n*-pentane to give [Cu-4] (216 mg, 92%) as white crystals, m.p. 259-260 °C (DCM/*n*-pentane). <sup>1</sup>H NMR (400 MHz, CDCl<sub>3</sub>)  $\delta$  6.95 (s, 4H, Ar), 3.95 (s, 4H, CH<sub>2</sub>(imidaz.)), 2.31 (s, 12H, Me), 2.30 (s, 6H, Me) ppm. UV spectrum  $\lambda$ , nm ( $\epsilon$ , cm<sup>-1</sup>M<sup>-1</sup>): 258 (12800). **NMR spectra coincide with the literature data<sup>13</sup>.**

### ***bis(1,2-bis(Diphenylphosphino)ethane)copper(I) tetrafluoroborate [Cu-5]***

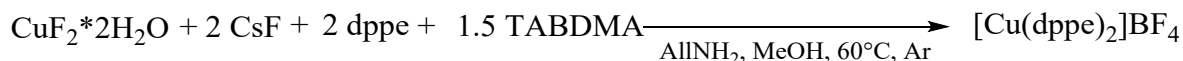

$\text{CuF}_2 \cdot 2\text{H}_2\text{O}$  (0.138 g, 1.0 mmol) and CsF (0.304 g, 2.0 mmol) were suspended in MeOH (20 ml) with allylamine (5 ml) and heated up to 60 °C with the formation of dark blue solution. To this solution cooled to rt TABDMA **1c** (0.269 g, 1.5 mmol) and dppe (0.800 g, 2 mmol) were added. Resulting light yellow solution was evaporated, and the residual oil was recrystallized from EtOAc to give **[Cu-5]** (0.38 g, 40%) as colorless crystals, m.p. 248-250 °C (EtOAc).  $^1\text{H}$  NMR ( $\text{CDCl}_3$ , 400 MHz):  $\delta$  7.35-7.31 (m, 8H, Ar), 7.20-7.15 (m, 32H, Ar), 2.43 (br.s, 8H,  $\text{CH}_2$ ) ppm.  $^{31}\text{P}$  NMR ( $\text{CDCl}_3$ , 121 MHz):  $\delta$  +7.05 (br.) ppm. UV spectrum  $\lambda$ , nm ( $\epsilon$ ,  $\text{cm}^{-1}\text{M}^{-1}$ ): 265 (27100). **NMR spectra coincide with the literature data<sup>14</sup>.**

### **General procedure of synthesis of cuprous(I) chloride complexes**

Cuprous(I) chloride (9.9 mg, 0.1 mmol) was dissolved in degassed MeCN (3 ml), phosphine ligand was added (1, 2 or 3 equiv. according to a formula of complex), and the suspension was refluxed under Ar atm. for 30 min. The mixture was cooled down to room temperature, evaporated and crystals were dried in vacuum and stored under Ar in a dark glass container. Yields were quantitative; some complexes crystallized as MeCN solvates.

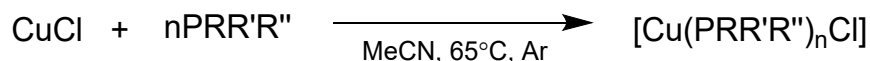

### ***tris(Triphenylphosphine)copper(I)chloride Cu(PPh<sub>3</sub>)<sub>3</sub>Cl\*MeCN [Cu-3]***

Colorless crystals, m.p. 168-170°C.  $^1\text{H}$  NMR ( $\text{CDCl}_3$ , 400 MHz):  $\delta$  7.32-7.28 (m, 27H, Ar), 7.20-7.17 (m, 18H, Ar), 2.00 (s, 3H, MeCN) ppm.  $^{31}\text{P}$  NMR ( $\text{CDCl}_3$ , 121 MHz):  $\delta$  -4.66 ppm. UV spectrum  $\lambda$ , nm ( $\epsilon$ ,  $\text{cm}^{-1}\text{M}^{-1}$ ): 259 (30300). **NMR spectra coincide with the literature data<sup>15</sup>.**

### ***bis[(1,1'-bis(Diphenylphosphino)ferrocene)copper(I)chloride] [Cu(dppf)Cl]<sub>2</sub> [Cu-6]***

A solution of dppf (277 mg, 0.5 mmol) in DCM (5 ml) was added to a solution of CuCl (49.5 mg, 0.5 mmol) in MeCN (15 ml) and stirred for 15 min, followed by evaporation of the resulting suspension. The complex was crystallized by adding MeCN to the saturated solution in  $\text{CHCl}_3$ . Yellowish-orange crystals, m.p. 254°C dec., ( $\text{CHCl}_3/\text{MeCN}$ ).  $^1\text{H}$  NMR ( $\text{CDCl}_3$ , 400 MHz):  $\delta$  7.70 (m, 16H, Ar), 7.37 (m, 24H, Ar), 4.33 (br.s, 8H, Cp), 4.20 (br.s, 8H, Cp) ppm.  $^{31}\text{P}$  NMR ( $\text{CDCl}_3$ , 121 MHz):  $\delta$  -19.10 ppm. UV spectrum  $\lambda$ , nm ( $\epsilon$ ,  $\text{cm}^{-1}\text{M}^{-1}$ ): 257 (18400). **NMR spectra coincide with the literature data<sup>16</sup>.**

### ***tris(Tri-(o-tolyl)phosphine)copper(I)chloride Cu(P(oTol))<sub>3</sub>Cl [Cu-7]***

Colorless crystals, m.p. 222-224°C.  $^1\text{H}$  NMR ( $\text{CDCl}_3$ , 400 MHz):  $\delta$  7.34-7.26 (m, 18H, Ar), 7.10 (t, 9H,  $J = 7.3$  Hz, Ar), 6.79 (t, 9H,  $J = 7.1$  Hz, Ar), 2.50 (s, 27H, Me) ppm.  $^{13}\text{C}$  NMR ( $\text{CDCl}_3$ , 101 MHz):  $\delta$  143.1 and 142.8 (d,  $J = 21.7$  Hz), 133.2 and 133.1 (d,  $J = 2.9$  Hz), 131.3 (br.), 130.84 and 130.78 (d,  $J = 6.0$  Hz), 129.7, 126.42 and 126.39 (d,  $J = 3.6$  Hz), 22.1 and 22.0 (d,  $J = 18.4$  Hz) ppm.  $^{31}\text{P}$  NMR ( $\text{CDCl}_3$ , 162 MHz):  $\delta$  -24.26 ppm. UV spectrum  $\lambda$ , nm ( $\epsilon$ ,  $\text{cm}^{-1}\text{M}^{-1}$ ): 275 (37000). Anal. Calcd. for  $\text{C}_{63}\text{H}_{63}\text{ClCuP}_3$  (1012.11): C, 74.76; H, 6.27; Cl, 3.50; found: C, 74.66; H, 6.26; Cl, 3.69.

#### ***tris*(Methyldiphenylphosphine)copper(I)chloride $\text{Cu}(\text{PPh}_2\text{Me})_3\text{Cl}$ [Cu-8]**

Colorless crystals, light-sensitive, m.p. 164-165 °C.  $^1\text{H}$  NMR ( $\text{CDCl}_3$ , 400 MHz):  $\delta$  7.30-7.26 (m, 18H, Ar), 7.20-7.15 (m, 12H, Ar), 1.56 (s, 9H, Me) ppm.  $^{13}\text{C}$  NMR ( $\text{CDCl}_3$ , 101 MHz):  $\delta$  136.8 and 136.6 ( $J = 21.2$  Hz), 132.3 and 132.2 ( $J = 12.2$  Hz), 129.0, 128.3 (br.), 13.1 and 13.0 ( $J = 12.3$  Hz) ppm.  $^{31}\text{P}$  NMR ( $\text{CDCl}_3$ , 121 MHz):  $\delta$  -19.24 ppm. UV spectrum  $\lambda$ , nm ( $\epsilon$ ,  $\text{cm}^{-1}\text{M}^{-1}$ ): 250 (21200). Anal. Calcd. for  $\text{C}_{39}\text{H}_{39}\text{ClCuP}_3$  (699.66): C, 66.95; H, 5.62; Cl, 5.07; found: C, 66.94; H, 5.77; Cl, 5.05.

#### ***[(4,5-bis*(Diphenylphosphino)-9,9-dimethylxanthene)copper(I)chloride] $[\text{Cu}(\text{XantPhos})\text{Cl}]$ [Cu-9]**

Colorless crystals, m.p. 347-349°C.  $^1\text{H}$  NMR ( $\text{CDCl}_3$ , 400 MHz):  $\delta$  7.59 (d, 2H,  $J = 7.8$  Hz, Ar), 7.47 (q, 8H,  $J = 6.3$  Hz, Ar), 7.38-7.33 (m, 5H, Ar), 7.29-7.26 (m, 8H, Ar), 7.15 (t, 2H,  $J = 7.7$  Hz, Ar), 6.62 (m, 2H, Ar), 1.74 and 1.71 (both s, 6H, Me) ppm.  $^{31}\text{P}$  NMR ( $\text{CDCl}_3$ , 162 MHz):  $\delta$  -17.72 ppm. UV spectrum  $\lambda$ , nm ( $\epsilon$ ,  $\text{cm}^{-1}\text{M}^{-1}$ ): 272 (19700). **NMR spectra coincide with the literature data<sup>17</sup>.**

### **Procedure for determination of reaction rate constants**

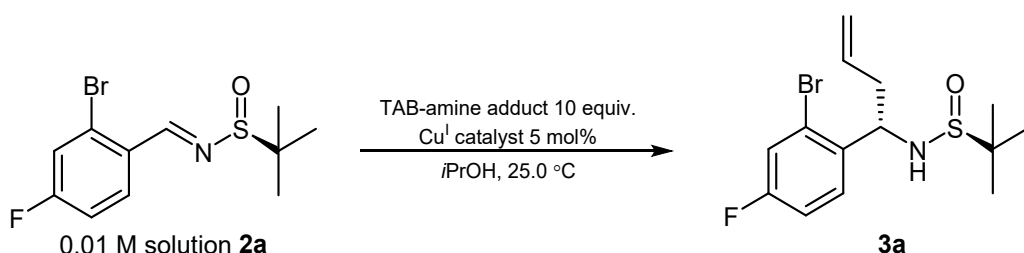

Before experiment conduction a series of standard solutions in *i*PrOH were prepared: Ellman's imine **2a** (0.04 M), TABMA **1a** (0.2 M),  $\text{Cu}^{\text{I}}$  catalyst [**Cu-1**] (0.002 M) and AcOH (0.01 M). It is recommended to prepare standard 0.2 M solutions of AAT in alcohols only before conduction of kinetic experiment and do not store for a long time without amine additive. In some cases, the solution of  $\text{Cu}^{\text{I}}$  catalyst (it's better to grind crystals to powder) should be preheated to be completely dissolved in *i*PrOH. All standard solutions were preliminarily cooled down to

temperature of an experiment. Vials (*circa* 7-10 pcs.) were filled with 3.0 ml of 0.01 M AcOH solution and stoppered with caps with rubber gasket to avoid the evaporation of solvent. Immediately before experiment vials were opened. To the temperature controlled jacketed flask (cooling agent was aqueous ethylene glycol) charged with magnetically stirred solution of 200  $\mu$ l of 0.04 M imine **2a** and 200  $\mu$ l of 0.002 M [**Cu-1**], 400  $\mu$ l of 0.2 M **1a** solution was added and simultaneously keep track of time with a stopwatch after addition **1a** solution. Every 15 seconds 50  $\mu$ l aliquot was taken from the reaction mixture and quenched in 3.0 ml 0.01 M AcOH solution in vial. After taking of 7-10 aliquots all vials were stoppered and shaken up. The zero-point solution ( $t = 0^{\text{th}}$  second) was prepared by mixing of 200  $\mu$ l of 0.04 M **2a** solution, 200  $\mu$ l of 0.002 M [**Cu-1**] solution and 400  $\mu$ l of *i*PrOH; from this solution a 50  $\mu$ l aliquot was taken and also dissolved in 3.0 ml 0.01 M AcOH solution in vial. For the resulting solutions of quenched and diluted reaction mixture UV spectra were recorded ( $\lambda = 235\text{-}360$  nm, quartz cuvettes with optical path 1.00 cm, the reference solution is 0.01 M AcOH in *i*PrOH). The absorbance at  $\lambda = 307$  nm was logged, and imine **2a** concentration was calculated by next formula based on Bouguer-Beer-Lambert law:

$$C_{imine} = C_{dil.} * k_{dil.} = \frac{A^{307}}{\varepsilon_{imine}^{307} * l} * \frac{V_{dilution} + V_{aliquot}}{V_{aliquot}} = \frac{A^{307}}{8425 M^{-1}cm^{-1} * 1.00 cm} * \frac{3.0}{0.05}$$

The rate constant was calculated as pseudo-first order reaction law approximation (excess of *i*PrOH and **1a**, concentration of catalyst [**Cu-1**] not change), the observed allylation rate constant was determined by plot logarithm of concentration **2a** versus time:

$$Rate\ of\ allylation = -\frac{dC(2a)}{dt} = k_{eff} * [2a]^1 * [1a]^1 * [Cu-1]^1 * [iPrOH]^1 \approx k_{obs}[2a]^1;$$

$$k_{obs} = -\frac{1}{t} * \ln \left( \frac{[2a]_t}{[2a]_0} \right)$$

The average error of this kinetic experiment procedure is 7%. Measurement error of reaction rate constant is calculated by next formula ( $S_x$  - standard deviation,  $t_s$  - Student's factor at  $p = 0.95$ ):

$$\pm \Delta = S_x * t_s = \sqrt{\frac{\sum_{i=1}^N (\ln C_i - \bar{\ln C})^2}{n(n-1)}} * t_s$$



## Optimization of the yield and diastereoselectivity of Ellman's imine allylation

**Table S1.** Influence of the alcohol on the diastereoselectivity of the allylation

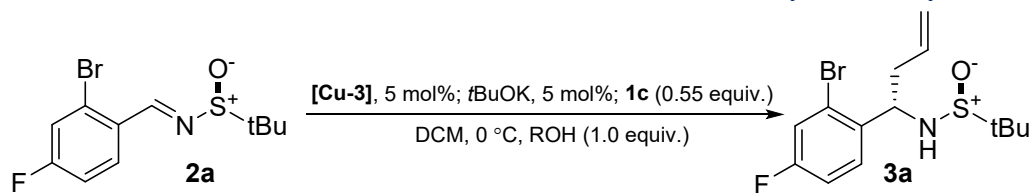

| Alcohol                               | Conv. <b>2a</b> , % <sup>a</sup> | <i>de</i> , % <sup>c</sup> |
|---------------------------------------|----------------------------------|----------------------------|
| MeOH                                  | 90                               | >98                        |
| MeOH                                  | 100 <sup>b</sup>                 | >99                        |
| EtOH                                  | 90                               | >97                        |
| <i>i</i> PrOH                         | 90                               | 98                         |
| <i>t</i> BuOH                         | 67                               | 96                         |
| MeOCH <sub>2</sub> CH <sub>2</sub> OH | 87                               | 95                         |
| <i>t</i> BuMe <sub>2</sub> SiOH       | 90                               | 95                         |

Addition of 1M alcohol sol. in THF for 30 min;

<sup>a</sup> by <sup>1</sup>H NMR; <sup>b</sup> conversion and *de* were obtained for addition of 1M alcohol sol. in THF for 1 h; <sup>c</sup> by chiral HPLC of *N*-Boc-homoallylamine

**Table S2.** Influence of the solvents on the yield and diastereoselectivity of the allylation

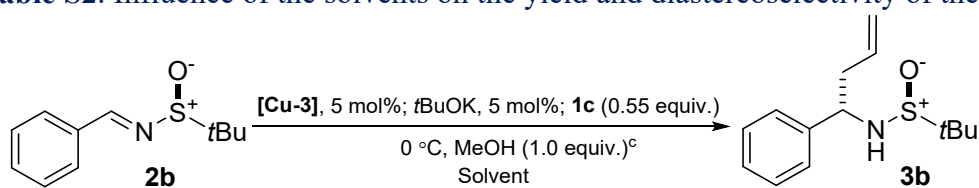

| Solvent           | Conv. <b>2b</b> , % <sup>d</sup> | <i>de</i> , % <sup>e</sup> |
|-------------------|----------------------------------|----------------------------|
| DCM <sup>a</sup>  | 77                               | 96                         |
| DCM               | 78                               | 95                         |
| THF               | 99                               | 95                         |
| DME               | 99                               | 95                         |
| <i>i</i> PrOAc    | 99                               | 95                         |
| Et <sub>3</sub> N | 80                               | 94                         |
| EtOAc             | 79                               | 94                         |
| DMSO <sup>b</sup> | 58                               | 94                         |

|                      |    |    |
|----------------------|----|----|
| Dioxane <sup>b</sup> | 99 | 93 |
| DMA                  | 69 | 93 |
| MeCN                 | 38 | 92 |
| PhMe                 | 53 | 92 |
| Et <sub>2</sub> NH   | 91 | 89 |

<sup>a</sup> with additive of 3 equiv. Et<sub>3</sub>N; <sup>b</sup> reaction was run at 25 °C; <sup>c</sup> Addition of 1M MeOH sol. in THF for 30 min; <sup>d</sup> by <sup>1</sup>H NMR; <sup>e</sup> by chiral HPLC of the phenyl-*N*-Boc-homoallylamine.

### Procedure for synthesis of Ellman's imines (2a-2w)

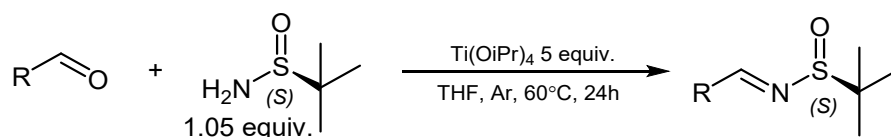

A 50 ml flask was charged with an aldehyde (5.0 mmol), (*S*)-2-methyl-2-propanesulfonamide (0.64 g, 5.25 mmol) and Ti(O*i*Pr)<sub>4</sub> (7.1 g, 7.4 mL, 25.0 mmol) in THF (8 mL) under Ar atm. The flask was stoppered and the solution was left on a water bath at 60 °C for 24 h. The resulting mixture was poured into water (50 mL), stirred for 15 min, then filtered through the pad of Hyflo® Super-Cell® and the filter-cake was washed with DCM. The filtrate was diluted with water (50 mL) and extracted with DCM (20 mL x 3). The combined organic extracts were dried over K<sub>2</sub>CO<sub>3</sub>, evaporated on a rotary evaporator. The purification method is described in detail in the substance resume, basically, flash chromatography is used.

#### (*S,E*)-*N*-(2-Bromo-4-fluorobenzylidene)-2-methylpropane-2-sulfonamide (2a)

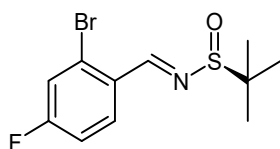

The purification by flash chromatography with gradient elution gives white solid. Yield: 91%, m.p. 47-49 °C (hexane), R<sub>f</sub> 0.55 (hexane/EtOAc, 4:1). <sup>1</sup>H NMR (CDCl<sub>3</sub>, 400 MHz): δ 8.90 (s, 1H, CH=N), 8.07 (td, 1H, *J* = 6.4 Hz, *J* = 1.5 Hz, Ar), 7.38 (dd, 1H, *J* = 8.0 Hz, *J* = 1.7 Hz, Ar), 7.12 (td, 1H, *J* = 8.1 Hz, *J* = 1.9 Hz, Ar), 1.26 (s, 9H, *t*Bu) ppm. <sup>13</sup>C NMR (CDCl<sub>3</sub>, 101 MHz): δ 165.9 and 163.3 (d, *J*<sub>CF</sub> = 259.6 Hz), 161.0, 131.4 and 131.4 (d, *J*<sub>CF</sub> = 8.8 Hz), 129.6 and 129.5 (d, *J*<sub>CF</sub> = 3.7 Hz), 127.2 and 127.1 (d, *J*<sub>CF</sub> = 10.0 Hz), 121.0 and 120.8 (d, *J*<sub>CF</sub> = 25.0 Hz), 115.7 and 115.5 (d, *J*<sub>CF</sub> = 21.4 Hz), 58.1, 22.8 (3C) ppm. UV spectrum λ, nm (ε, cm<sup>-1</sup>M<sup>-1</sup>): 210 (18550), 256 (9000), 281 (8000), 297 (7890). **NMR spectra coincide with the literature data<sup>18</sup>.**

#### (*S,E*)-*N*-Benzylidene-2-methylpropane-2-sulfonamide (2b)

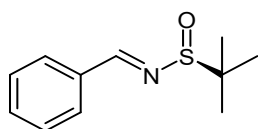

The purification by flash chromatography with gradient elution gives lemon-yellow oil. Yield: 88%,  $R_f$  0.48 (hexane/EtOAc, 4:1).  $^1\text{H NMR}$  ( $\text{CDCl}_3$ , 400 MHz):  $\delta$  8.57 (s, 1H, CH=N), 7.83 (d, 2H,  $J = 6.8$  Hz, Ar), 7.52-7.44 (m, 3H, Ar), 1.25 (s, 9H, *t*Bu) ppm. UV spectrum  $\lambda$ , nm ( $\epsilon$ ,  $\text{cm}^{-1}\text{M}^{-1}$ ): 198 (18070), 249 (9050), 275 (8310). **NMR spectrum coincides with the literature data<sup>19</sup>.**

**(*S,E*)-*N*-(2-Fluorobenzylidene)-2-methylpropane-2-sulfinamide (2c)**

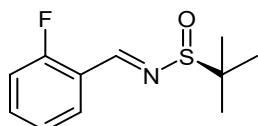

The purification by flash chromatography with gradient elution gives yellow oil. Yield: 83%,  $R_f$  0.55 (hexane/EtOAc, 4:1).  $^1\text{H NMR}$  ( $\text{CDCl}_3$ , 400 MHz):  $\delta$  8.89 (s, 1H, CH=N), 7.99 (t, 1H,  $J = 7.4$  Hz, Ar), 7.52-7.47 (m, 1H, Ar), 7.23 (t, 1H,  $J = 7.5$  Hz, Ar), 7.14 (t, 1H,  $J = 9.4$  Hz, Ar), 1.26 (s, 9H, *t*Bu) ppm. UV spectrum  $\lambda$ , nm ( $\epsilon$ ,  $\text{cm}^{-1}\text{M}^{-1}$ ): 197 (18750), 244 (10640), 299 (8750). **NMR spectrum coincides with the literature data<sup>20</sup>.**

**(*R,E*)-*N*-(2-Iodobenzylidene)-2-methylpropane-2-sulfinamide (2d)**

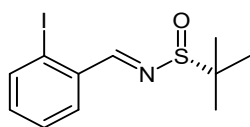

The synthesis was carried out using (*R*)-2-methyl-2-propanesulfinamide instead of (*S*)-2-methyl-2-propanesulfinamide. The purification by flash chromatography with gradient elution gives yellow solid. Yield: 95%, m.p. 76-77 °C (hexane),  $R_f$  0.49 (hexane/EtOAc, 4:1).  $^1\text{H NMR}$  ( $\text{CDCl}_3$ , 400 MHz):  $\delta$  8.77 (s, 1H, CH=N), 7.99 (d, 1H,  $J = 7.7$  Hz, Ar), 7.93 (d, 1H,  $J = 7.8$  Hz, Ar), 7.42 (t, 1H,  $J = 7.4$  Hz, Ar), 7.17 (t, 1H,  $J = 7.9$  Hz, Ar), 1.27 (s, 9H, *t*Bu) ppm. UV spectrum  $\lambda$ , nm ( $\epsilon$ ,  $\text{cm}^{-1}\text{M}^{-1}$ ): 224 (16240), 254 (7420), 262 (7390), 287 (7710), 306 (7690). **NMR spectrum coincides with the literature data<sup>21</sup>.**

**(*S,E*)-*N*-(2-Chlorobenzylidene)-2-methylpropane-2-sulfinamide (2e)**

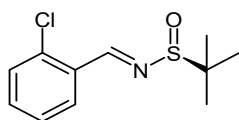

The purification by flash chromatography with gradient elution gives lemon-yellow oil. Yield: 94%,  $R_f$  0.53 (hexane/EtOAc, 4:1).  $^1\text{H NMR}$  ( $\text{CDCl}_3$ , 400 MHz):  $\delta$  9.04 (s, 1H, CH=N), 8.06 (d, 1H,  $J = 7.8$  Hz, Ar), 7.46-7.41 (m, 2H, Ar), 7.37-7.33 (m, 1H, Ar), 1.28 (s, 9H, *t*Bu) ppm. UV spectrum  $\lambda$ , nm ( $\epsilon$ ,  $\text{cm}^{-1}\text{M}^{-1}$ ): 210 (18480), 249 (8830), 300 (7570). **NMR spectrum coincides with the literature data<sup>22</sup>.**

**(*S,E*)-*N*-(2-Bromobenzylidene)-2-methylpropane-2-sulfinamide (2f)**

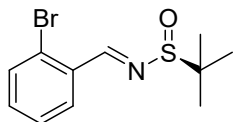

The purification by flash chromatography with gradient elution gives yellow oil. Yield: 85%,  $R_f$  0.41 (hexane/EtOAc, 4:1).  $^1\text{H}$  NMR ( $\text{CDCl}_3$ , 400 MHz):  $\delta$  8.95 (s, 1H, CH=N), 8.01 (dd, 1H,  $J = 7.6, 1.1$  Hz, Ar), 7.61 (d, 1H,  $J = 7.7$  Hz, Ar), 7.37 (t, 1H,  $J = 7.2$  Hz, Ar), 7.32 (td,  $J = 7.7, 1.1$  Hz, Ar), 1.25 (s, 9H, *t*Bu) ppm.  $^{13}\text{C}$  NMR ( $\text{CDCl}_3$ , 101 MHz):  $\delta$  162.2, 133.7, 133.4, 132.9, 129.7, 127.8, 126.5, 58.1, 22.8 (3C) ppm. UV spectrum  $\lambda$ , nm ( $\epsilon$ ,  $\text{cm}^{-1}\text{M}^{-1}$ ): 209 (17630), 254 (8330), 301 (7620). **NMR spectra coincide with the literature data<sup>23</sup>.**

**(*S,E*)-*N*-(3-Bromobenzylidene)-2-methylpropane-2-sulfinamide (2g)**

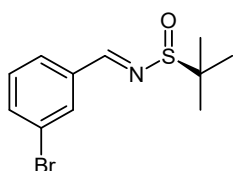

The purification by flash chromatography with gradient elution gives white solid. Yield: 96%, m.p. 34-35 °C (hexane),  $R_f$  0.42 (hexane/EtOAc, 4:1).  $^1\text{H}$  NMR ( $\text{CDCl}_3$ , 400 MHz):  $\delta$  8.50 (s, 1H, CH=N), 8.00 (s, 1H, Ar), 7.72 (d, 1H,  $J = 7.6$  Hz, Ar), 7.62 (d, 1H,  $J = 8.0$  Hz, Ar), 7.34 (t, 1H,  $J = 7.8$  Hz, Ar), 1.25 (s, 9H, *t*Bu) ppm. UV spectrum  $\lambda$ , nm ( $\epsilon$ ,  $\text{cm}^{-1}\text{M}^{-1}$ ): 215 (22200), 249 (8740), 278 (7550), 299 (7820). **NMR spectrum coincides with the literature data<sup>24</sup>.**

**(*S,E*)-2-Methyl-*N*-(3-methylbenzylidene)propane-2-sulfinamide (2h)**

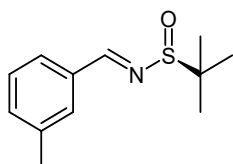

The purification by flash chromatography with gradient elution gives light-yellow liquid. Yield: 84%,  $R_f$  0.47 (hexane/EtOAc, 4:1).  $^1\text{H}$  NMR ( $\text{CDCl}_3$ , 400 MHz):  $\delta$  8.54 (s, 1H, CH=N), 7.66-7.62 (m, 2H, Ar), 7.37-7.30 (m, 2H, Ar), 2.40 (s, 3H, *m*-Me), 1.25 (s, 9H, *t*Bu) ppm.  $^{13}\text{C}$  NMR ( $\text{CDCl}_3$ , 101 MHz): 163.0, 138.9, 134.2, 133.4, 129.8, 129.0, 127.0, 57.8, 22.7 (3C), 21.4 ppm. UV spectrum  $\lambda$ , nm ( $\epsilon$ ,  $\text{cm}^{-1}\text{M}^{-1}$ ): 208 (21190), 253 (9690), 274 (9780), 294 (9820). **NMR spectra coincide with the literature data<sup>25</sup>.**

**(*S,E*)-*N*-(4-Methoxy-2,3-dimethylbenzylidene)-2-methylpropane-2-sulfinamide (2i)**

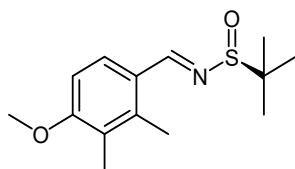

The purification by flash chromatography with gradient elution gives white solid. Yield: 81%, m.p. 115-116 °C (hexane),  $R_f$  0.33 (hexane/EtOAc, 4:1),  $[\alpha]_D^{25} +48.2$  ( $c$  1.0,  $\text{CHCl}_3$ ).  $^1\text{H}$  NMR ( $\text{CDCl}_3$ , 400 MHz):  $\delta$  8.83 (s, 1H,  $\text{CH}=\text{N}$ ), 7.82 (d, 1H,  $J = 8.7$  Hz, Ar), 6.79 (d, 1H,  $J = 8.6$  Hz, Ar), 3.86 (s, 3H, OMe), 2.50 (s, 3H,  $m$ -Me), 2.19 (s, 3H,  $o$ -Me), 1.24 (s, 9H,  $t$ Bu) ppm.  $^{13}\text{C}$  NMR ( $\text{CDCl}_3$ , 101 MHz):  $\delta$  161.6, 160.6, 139.8, 128.9, 125.9, 125.6, 108.0, 57.5, 55.7, 22.7 (3C), 15.5, 11.8 ppm. UV spectrum  $\lambda$ , nm ( $\epsilon$ ,  $\text{cm}^{-1}\text{M}^{-1}$ ): 208 (16520), 233 (13610), 310 (18830). Anal. Calcd. for  $\text{C}_{14}\text{H}_{21}\text{NO}_2\text{S}$  (267.39): C, 62.89; H, 7.92; N, 5.24; found: C, 62.68; H, 7.86; N, 5.14.

#### **(*S,E*)-*N*-(4-Chlorobenzylidene)-2-methylpropane-2-sulfinamide (2j)**

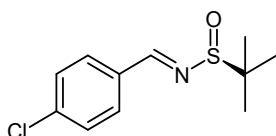

The purification by flash chromatography with gradient elution gives yellowish-brown solid. Yield: 92%, m.p. 44-46 °C (hexane),  $R_f$  0.45 (hexane/EtOAc, 4:1).  $^1\text{H}$  NMR ( $\text{CDCl}_3$ , 400 MHz):  $\delta$  8.53 (s, 1H,  $\text{CH}=\text{N}$ ), 7.77 (d, 2H,  $J = 8.1$  Hz, Ar), 7.43 (d, 2H,  $J = 8.0$  Hz, Ar), 1.24 (s, 1H,  $t$ Bu) ppm. UV spectrum  $\lambda$ , nm ( $\epsilon$ ,  $\text{cm}^{-1}\text{M}^{-1}$ ): 199 (18280), 257 (12460), 275 (11160). **NMR spectrum coincides with the literature data<sup>19</sup>.**

#### **(*S,E*)-2-Methyl-*N*-(3-phenylpropylidene)propane-2-sulfinamide (2k)**

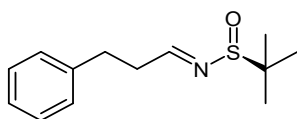

The purification by flash chromatography with gradient elution gives light yellow oil. Yield: 89%,  $R_f$  0.48 (hexane/EtOAc, 2:1).  $^1\text{H}$  NMR ( $\text{CDCl}_3$ , 400 MHz):  $\delta$  8.11 (t, 1H,  $J = 4.2$  Hz,  $\text{CH}=\text{N}$ ), 7.31-7.27 (m, 2H, Ar), 7.22-7.18 (m, 3H, Ar), 2.99-2.95 (m, 2H,  $\text{Ph-CH}_2\text{-CH}_2$ ), 2.89-2.84 (m, 2H,  $\text{Ph-CH}_2\text{-CH}_2$ ), 1.13 (s, 9H,  $t$ Bu) ppm. UV spectrum  $\lambda$ , nm ( $\epsilon$ ,  $\text{cm}^{-1}\text{M}^{-1}$ ): 247 (4950). **NMR spectrum coincides with the literature data<sup>26</sup>.**

#### **(*S*)-2-Methyl-*N*-((1*E*,2*E*)-3-phenylallylidene)propane-2-sulfinamide (2l)**

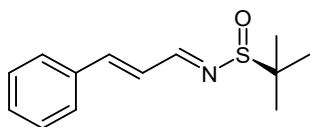

The purification by flash chromatography with gradient elution gives lemon-yellow solid. Yield: 91%, m.p. 62-63 °C (hexane),  $R_f$  0.44 (hexane/EtOAc, 2:1).  $^1\text{H}$  NMR ( $\text{CDCl}_3$ , 400 MHz):  $\delta$  8.37 (d, 1H,  $J = 9.2$  Hz,  $\text{CH}=\text{N}$ ), 7.55-7.53 (m, 2H, Ar), 7.39 (m, 3H, Ar), 7.22 (d, 1H,  $J = 15.3$  Hz,  $\text{Ph-CH}=\text{CH}$ ), 7.08 (dd, 1H,  $J = 9.2, 15.9$  Hz,  $\text{Ph-CH}=\text{CH}$ ), 1.23 (s, 9H,  $t$ Bu) ppm. UV spectrum  $\lambda$ , nm ( $\epsilon$ ,  $\text{cm}^{-1}\text{M}^{-1}$ ): 204 (12160), 226 (11300), 307 (25060). **NMR spectrum coincides with the literature data<sup>27</sup>.**

**(*S,E*)-*N*-((4-Methoxynaphthalen-1-yl)methylene)-2-methylpropane-2-sulfinamide (2m)**

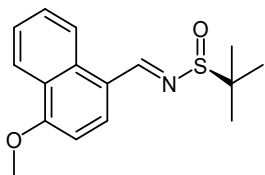

After the evaporation the residue was recrystallized from hexane/EtOAc (8:1) solution, that gave beige solid. Yield: 83%, m.p. 129-130 °C (hexane/EtOAc, 8:1),  $R_f$  0.34 (hexane/EtOAc, 2:1).  $^1\text{H}$  NMR ( $\text{CDCl}_3$ , 400 MHz):  $\delta$  9.19 (d, 1H,  $J = 8.6$  Hz, Ar), 8.96 (s, 1H, CH=N), 8.35 (d, 1H,  $J = 8.3$  Hz, Ar), 7.94 (d, 1H,  $J = 8.1$  Hz, Ar), 7.65 (t, 1H,  $J = 8.1$  Hz, Ar), 7.56 (t, 1H,  $J = 7.5$  Hz, Ar), 6.88 (d, 1H,  $J = 8.2$  Hz, Ar), 4.06 (s, 3H, OMe), 1.31 (s, 9H, *t*Bu) ppm.  $^{13}\text{C}$  NMR ( $\text{CDCl}_3$ , 101 MHz): 162.4, 159.5, 135.2, 132.4, 128.7, 126.0, 125.8, 124.8, 122.7, 122.6, 103.5, 57.5, 56.0, 22.7 (3C) ppm. UV spectrum  $\lambda$ , nm ( $\epsilon$ ,  $\text{cm}^{-1}\text{M}^{-1}$ ): 240 (29280), 343 (19920). **NMR spectra coincide with the literature data<sup>28</sup>.**

**(*S,E*)-2-Methyl-*N*-(thiophen-2-ylmethylene)propane-2-sulfinamide (2n)**

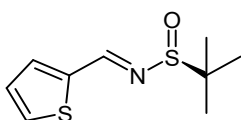

After the evaporation the residue was recrystallized from hexane that gave beige solid. Yield: 85%, m.p. 85-86 °C (hexane),  $R_f$  0.46 (hexane/EtOAc, 2:1).  $^1\text{H}$  NMR ( $\text{CDCl}_3$ , 400 MHz):  $\delta$  8.67 (s, 1H, CH=N), 7.59 (dd, 1H,  $J = 4.8, 1.0$  Hz, Ar), 7.53 (dd, 1H,  $J = 3.5, 1.1$  Hz, Ar), 7.14 (td, 1H,  $J = 3.8, 1.2$  Hz, Ar), 1.24 (s, 9H, *t*Bu) ppm. UV spectrum  $\lambda$ , nm ( $\epsilon$ ,  $\text{cm}^{-1}\text{M}^{-1}$ ): 215 (3400), 263 (8840), 312 (12680). **NMR spectrum coincides with the literature data<sup>29</sup>.**

**(*S,E*)-2-Methyl-*N*-(4-nitrobenzylidene)propane-2-sulfinamide (2o)**

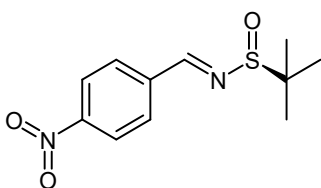

After the evaporation the residue was dissolved in ethyl acetate, sedimentated by hexane addition and filtered. Filtration gave pure pale yellow solid. Yield: 90%, m.p. 139-140 °C (hexane),  $R_f$  0.38 (hexane/EtOAc, 2:1).  $^1\text{H}$  NMR ( $\text{CDCl}_3$ , 400 MHz):  $\delta$  8.67 (s, 1H, CH=N), 8.34 (d, 2H,  $J = 8.6$  Hz, Ar), 8.03 (d, 2H,  $J = 8.6$  Hz, Ar), 1.29 (s, 9H, *t*Bu) ppm. UV spectrum  $\lambda$ , nm ( $\epsilon$ ,  $\text{cm}^{-1}\text{M}^{-1}$ ): 270 (8940), 318 (9900). **NMR spectrum coincides with the literature data<sup>29</sup>.**

**(*S,E*)-*N*-(4-(Dimethylamino)benzylidene)-2-methylpropane-2-sulfinamide (2p)**

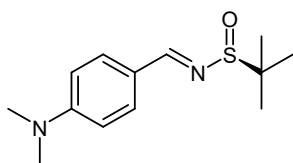

The residue was purified by flash chromatography with gradient elution and recrystallized from hexane that gave yellow solid. Yield: 83%, m.p. 96-97 °C (hexane),  $R_f$  0.32 (hexane/EtOAc, 2:1).  $^1\text{H NMR}$  ( $\text{CDCl}_3$ , 400 MHz):  $\delta$  8.43 (s, 1H, CH=N), 7.72 (d, 2H,  $J = 8.6$  Hz, Ar), 6.70 (d, 2H,  $J = 8.6$  Hz, Ar), 3.06 (s, 6H,  $\text{NMe}_2$ ), 1.23 (s, 9H,  $t\text{Bu}$ ) ppm. UV spectrum  $\lambda$ , nm ( $\epsilon$ ,  $\text{cm}^{-1}\text{M}^{-1}$ ): 240 (9280), 354 (36420). **NMR spectrum coincides with the literature data<sup>29</sup>.**

**(S,E)-N-(2-Hydroxybenzylidene)-2-methylpropane-2-sulfinamide (2q)**

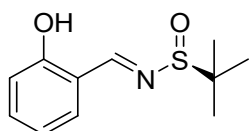

The compound was purified by flash chromatography with gradient elution that gave white solid. Yield: 86%,  $R_f$  0.36 (hexane/EtOAc, 4:1), m.p. 87-89 °C (hexane).  $^1\text{H NMR}$  ( $\text{CDCl}_3$ , 400 MHz):  $\delta$  11.02 (s, 1H, OH), 8.68 (s, 1H, CH=N), 7.47-7.40 (m, 2H, Ar), 7.01-6.96 (m, 2H, Ar), 1.25 (s, 9H,  $t\text{Bu}$ ) ppm. UV spectrum  $\lambda$ , nm ( $\epsilon$ ,  $\text{cm}^{-1}\text{M}^{-1}$ ): 214 (21300), 269 (10250), 291 (9430), 330 (8940). **NMR spectrum coincides with the literature data<sup>30</sup>.**

**(S,E)-2-Methyl-N-(pyridin-4-ylmethylene)propane-2-sulfinamide (2r)**

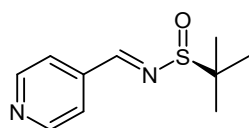

The residue was purified by flash chromatography with gradient elution. Recrystallization from hexane gave white solid. Yield: 78%,  $R_f$  0.44 (hexane/EtOAc, 1:1), m.p. 47-48 °C (hexane).  $^1\text{H NMR}$  ( $\text{CDCl}_3$ , 400 MHz):  $\delta$  8.77 (dd, 2H,  $J = 1.5$  Hz,  $J = 4.2$  Hz, Ar), 8.57 (s, 1H, CH=N), 7.67 (dd, 2H,  $J = 1.6$  Hz,  $J = 2.8$  Hz, Ar), 1.26 (s, 9H,  $t\text{Bu}$ ) ppm.  $^{13}\text{C NMR}$  ( $\text{CDCl}_3$ , 101 MHz):  $\delta$  161.4, 151.0 (2C), 140.2, 122.5 (2C), 58.5, 22.8 (3C) ppm. UV spectrum  $\lambda$ , nm ( $\epsilon$ ,  $\text{cm}^{-1}\text{M}^{-1}$ ): 227 (12470), 285 (6800). **NMR spectra coincide with the literature data<sup>31</sup>.**

**(S,E)-2-Methyl-N-(pyridin-3-ylmethylene)propane-2-sulfinamide (2s)**

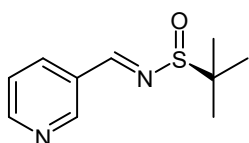

The residue was purified by flash chromatography with gradient elution and solution in hexane was washed with small amount of  $\text{NaHSO}_3$  solution to remove the impurity of aldehyde, dried

with  $K_2CO_3$  and evaporated that gave yellow oil. Yield: 87%,  $R_f$  0.48 (hexane/EtOAc, 1:1).  $^1H$  NMR ( $CDCl_3$ , 400 MHz):  $\delta$  8.96 (d, 1H,  $J = 1.3$  Hz, Ar), 8.66 (dd, 1H,  $J = 4.8, 1.5$  Hz, Ar), 8.58 (s, 1H, CH=N), 8.10 (dt, 1H,  $J = 6.3, 1.6$  Hz, Ar), 7.35 (dd, 1H,  $J = 7.9, 4.5$  Hz, Ar), 1.20 (s, 9H, *t*Bu) ppm. UV spectrum  $\lambda$ , nm ( $\epsilon$ ,  $cm^{-1}M^{-1}$ ): 234 (12420), 282 (7380). **NMR spectrum coincides with the literature data<sup>27</sup>.**

**(*S,E*)-2-Methyl-*N*-(pyridin-2-ylmethylene)propane-2-sulfinamide (2t)**

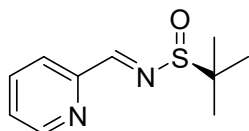

The compound was purified by flash chromatography with gradient elution that gave yellow oil. Yield: 94%,  $R_f$  0.37 (hexane/EtOAc, 1:1).  $^1H$  NMR ( $CDCl_3$ , 400 MHz):  $\delta$  8.72 (d, 1H,  $J = 4.3$  Hz, Ar), 8.67 (s, 1H, CH=N), 7.99 (d, 1H,  $J = 7.8$  Hz, Ar), 7.79 (td, 1H,  $J = 7.7, 1.2$  Hz, Ar), 7.39-7.36 (m, 1H, Ar), 1.25 (s, 9H, *t*Bu) ppm. UV spectrum  $\lambda$ , nm ( $\epsilon$ ,  $cm^{-1}M^{-1}$ ): 238 (6840), 284 (6600). **NMR spectrum coincides with the literature data<sup>29</sup>.**

**(*S,E*)-2-Methyl-*N*-((3-methylpyridin-2-yl)methylene)propane-2-sulfinamide (2u)**

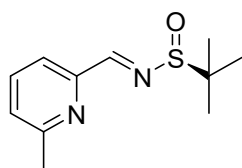

The residue was purified by flash chromatography with gradient elution. Recrystallization from hexane gave white solid. Yield: 84%,  $R_f$  0.39 (hexane/EtOAc, 2:1), m.p. 58-59 °C (hexane),  $[\alpha]_D^{25} +190.6$  ( $c$  1.0,  $CHCl_3$ ).  $^1H$  NMR ( $CDCl_3$ , 400 MHz):  $\delta$  8.62 (s, 1H, CH=N), 7.79 (d, 1H,  $J = 7.7$  Hz, Ar), 7.64 (t, 1H,  $J = 7.7$  Hz, Ar), 7.21 (d, 1H,  $J = 7.6$  Hz, Ar), 2.56 (s, 3H, Me), 1.22 (s, 9H, *t*Bu) ppm.  $^{13}C$  NMR ( $CDCl_3$ , 101 MHz):  $\delta$  164.0, 159.1, 151.9, 137.0, 125.7, 120.1, 58.0, 24.4, 22.7 (3C) ppm. UV spectrum  $\lambda$ , nm ( $\epsilon$ ,  $cm^{-1}M^{-1}$ ): 198 (20800), 242 (6170), 293 (8980). Anal. Calcd. for  $C_{11}H_{16}N_2OS$  (224.322): C, 58.90; H, 7.19; N, 12.49; found: C, 58.74; H, 7.19; N, 12.41.

**(*S,E*)-*N*-((1-ethyl-1*H*-pyrazol-4-yl)methylene)-2-methylpropane-2-sulfinamide (2v)**

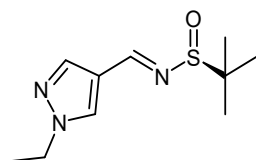

The compound was purified by flash chromatography with gradient elution that gave yellow oil. Yield: 95%,  $R_f$  0.50 (hexane/EtOAc, 1:1).  $^1H$  NMR ( $CDCl_3$ , 400 MHz):  $\delta$  8.44 (s, 1H, CH=N), 7.86 (s, 1H, Ar), 7.81 (s, 1H, Ar), 4.17 (q, 2H,  $J = 7.3$  Hz,  $CH_2-CH_3$ ), 1.49 (t, 2H,  $J = 7.2$  Hz,



CH<sub>2</sub>-CH<sub>3</sub>), 1.17 (s, 9H, *t*Bu) ppm. UV spectrum  $\lambda$ , nm ( $\epsilon$ , cm<sup>-1</sup>M<sup>-1</sup>): 206 (8260), 283 (12220).

**NMR spectrum coincides with the literature data<sup>5</sup>.**

### (*S,E*)-2-Methyl-*N*-((1-phenyl-1*H*-pyrazol-4-yl)methylene)propane-2-sulfonamide (**2w**)

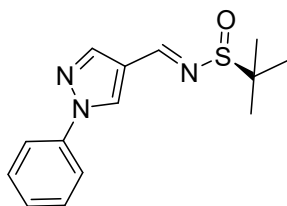

The residue was purified by flash chromatography with gradient elution. Recrystallization from hexane/*i*Pr<sub>2</sub>O gave white solid. Yield: 85%, m.p. 67-68°C (hexane/*i*Pr<sub>2</sub>O), R<sub>f</sub> 0.27 (hexane/EtOAc, 2:1). <sup>1</sup>H NMR (CDCl<sub>3</sub>, 400 MHz):  $\delta$  8.57 (s, 1H, CH=N), 8.33 (s, 1H, CH<sub>pyr</sub>), 8.11 (s, 1H, CH<sub>pyr</sub>), 7.71 (d, 2H, *J* = 7.8 Hz, Ph), 7.48 (t, 2H, *J* = 7.4 Hz, Ph), 7.35 (t, 1H, *J* = 7.7 Hz, Ph), 1.24 (s, 9H, *t*Bu) ppm. UV spectrum  $\lambda$ , nm ( $\epsilon$ , cm<sup>-1</sup>M<sup>-1</sup>): 196 (28440), 294 (21060).

**NMR spectrum coincides with the literature data<sup>5</sup>.**

### Procedure for allylation of Ellman's imines **2a-w** and synthesis of **3a-w**

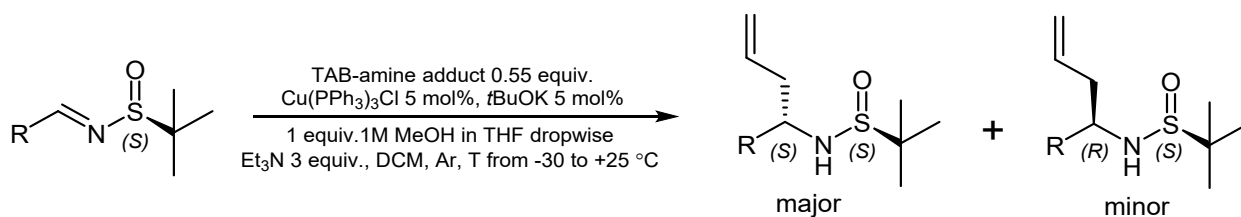

A 25 ml 2-necks pear-shaped flask was charged with an Ellman's imine (0.32 mmol), catalyst Cu(PPh<sub>3</sub>)<sub>3</sub>Cl [**Cu-3**] (14.4 mg, 0.016 mmol, 5 mol%) and a magnetic stirrer bar. The flask was stoppered, evacuated and filled with Ar atm. 3 times. Then, to the catalyst and substrate mixture, DCM (1 ml) was added, and the flask was immersed in a cooling bath. To the cooled stirred solution, sublimated solid *t*BuOK (1.8 mg, 0.016 mmol, 5 mol%) or 0.8M *t*BuOK stock solution in THF (20  $\mu$ l, 0.016 mmol) was added. [All amount of *t*BuOK has to be entered into the solution that led to the color change from almost colorless to light yellow or bright orange] Further, 3 equiv. of Et<sub>3</sub>N (134  $\mu$ l, 97.2 mg, 0.96 mmol) and 0.55 equiv. (0.66 equiv. for **2b**, **2h**, **2i**, **2m**, **2n** and **2p**) of the corresponding adduct was added (see **Table S3**). The reaction mixture was stirred for indicated Time A. Then 1 equiv. of 1M solution of MeOH (13  $\mu$ l, 10.2 mg, 0.32 mmol) in anhydrous THF (307  $\mu$ l) was added by slow injection through the septum by Syringe Pump over Time B. When alcohol solution was completely added, the mixture was stirred for extra Time C. The end of the reaction was controlled by the disappearance of imine on TLC, other eye-visible sign of the reaction progress is slow disappearing of yellow color (or change of orange color to yellow in case of pyridinic substrates **2r-u**). The reaction was quenched with 5 equiv. of glacial

AcOH (92  $\mu$ l, 96 mg, 1.6 mmol) followed by evaporation. All substrates except pyridinic type (**2a-q**, **2v-w**) were worked up as follows. After evaporation the resulting oil was dissolved in a mixture of Et<sub>2</sub>O and K<sub>2</sub>CO<sub>3</sub> aq. solution and stirred for 30 min, during that time the aqueous layer became blue-colored. Etheral layer was separated and aqueous one extracted several times. The combined extracts were dried over K<sub>2</sub>CO<sub>3</sub> and evaporated.

To the pyridinic substrates (**2r-u**) after evaporation of solvent, EDTA (60 mg, 0.2 mmol), K<sub>2</sub>CO<sub>3</sub> (1.36 g, 10 mmol), H<sub>2</sub>O (5 ml) and EtOAc (3 ml) were added and the mixture was stirred for 30 min. The organic extract was separated, dried over K<sub>2</sub>CO<sub>3</sub> and evaporated.

The ratio of diastereomeric allylated amides **3a,b** can be determined by proton NMR spectra. However at high ratios of diastereomers, precise analysis of reaction mixtures was hampered by small impurities. Chromatography purification of the reaction mixtures will change the authentic diastereomers ratio and has to be avoided. It is more accurate to transform diastereomers into enantiomers, having uniform chemical and physical properties followed by analysis using chiral HPLC. In our case the full procedure for analysis includes a standard desulfination of crude homoallylamides with HCl/MeOH sol.,<sup>[32]</sup> followed by treatment of the formed homoallylamines hydrochlorides by the Boc-anhydride in the presence of Et<sub>3</sub>N in THF thus preparing *N*-Boc-homoallylamines as a mixture of enantiomers. The completeness of the desulfination of amides was controlled by TLC, making concentrated (overloaded) spot on TLC plate to see any traces of starting amide. Corresponding racemates for chiral HPLC analysis were synthesized *via* three component aminoallylation of carbonyl compounds<sup>[3]</sup> followed by the *N*-Boc-acylation of *rac*-homoallylamines.

**Table S3. Reaction conditions for different adducts application (variations №1-4).**

| № | T, °C | Cooling bath                                              | TAB adduct | Time A (stirring w/o MeOH), min | Time B (MeOH addition), min | Time C (post addition), min |
|---|-------|-----------------------------------------------------------|------------|---------------------------------|-----------------------------|-----------------------------|
| 1 | 25    | Water                                                     | <b>1a</b>  | 5                               | 5                           | 5                           |
| 2 | 0     | Ice/water                                                 | <b>1c</b>  | 15                              | 30                          | 30                          |
| 3 | -15   | (CH <sub>2</sub> OH) <sub>2</sub> /N <sub>2</sub> liq.    | <b>1d</b>  | 30                              | 60                          | 60                          |
| 4 | -30   | (CH <sub>2</sub> OH) <sub>2</sub> aq./N <sub>2</sub> liq. |            | 120                             | 120                         | 180                         |

**(S)-N-((S)-1-(2-Bromo-4-fluorophenyl)but-3-en-1-yl)-2-methylpropane-2-sulfinamide (3a)**

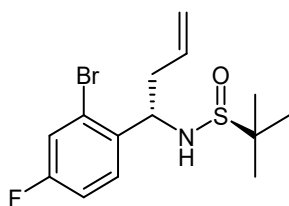

The substance was obtained by variation method №2 (**Table S3**). The compound was purified by flash chromatography with gradient elution (hexane/EtOAc from 8:1 to 1:1) that gave white solid. Yield: 95%, *de* > 99%, *R<sub>f</sub>* 0.42 (hexane/EtOAc, 1:1), m.p. 79-80 °C (hexane),  $[\alpha]_{\text{D}}^{25} +5.7$  (*c* 1.0, CHCl<sub>3</sub>). <sup>1</sup>H NMR (CDCl<sub>3</sub>, 400 MHz): δ 7.39 (dd, 1H, *J* = 8.7, 6.0 Hz, Ar), 7.29 (dd, 1H, *J* = 8.2, 2.5 Hz, Ar), 7.04 (td, 1H, *J* = 8.4, 2.5 Hz, Ar), 5.70-5.60 (m, 1H, CH=), 5.10-5.06 (m, 2H, CH<sub>2</sub>=), 4.84 (q, 1H, *J* = 6.2 Hz, CHAr), 3.76 (d, 1H, *J* = 5.7 Hz, NH), 2.65-2.54 (m, 2H, CH<sub>2</sub>), 1.19 (s, 9H, *t*Bu) ppm. <sup>13</sup>C NMR (CDCl<sub>3</sub>, 101 MHz): δ 162.8 and 160.3 (d, *J<sub>CF</sub>* = 251.8 Hz), 136.91 and 136.88 (d, *J<sub>CF</sub>* = 3.5 Hz), 133.2, 129.9 and 129.8 (d, *J<sub>CF</sub>* = 8.6 Hz), 123.3 and 123.2 (d, *J<sub>CF</sub>* = 9.4 Hz), 120.4 and 120.2 (d, *J<sub>CF</sub>* = 24.4 Hz), 119.2, 115.0 and 114.8 (d, *J<sub>CF</sub>* = 21.2 Hz), 56.8, 56.5, 40.5, 22.7 (3C) ppm. UV spectrum λ, nm (ε, cm<sup>-1</sup>M<sup>-1</sup>): 269 (806), 276 (725). Anal. Calcd. for C<sub>14</sub>H<sub>19</sub>BrFNOS (348.27): C, 48.28; H, 5.50; N, 4.02; found: C, 48.11; H, 5.71; N, 3.91.

**(S)-2-Methyl-N-((S)-1-phenylbut-3-en-1-yl)propane-2-sulfonamide (3b)**

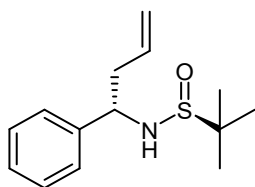

The substance was obtained by variation method №2 (**Table S3**). The compound was purified by flash chromatography with gradient elution (hexane/EtOAc from 8:1 to 1:1) that gave white solid. Yield: 95%, *de* 96%, *R<sub>f</sub>* 0.30 (hexane/EtOAc, 1:1), m.p. 83-84°C (hexane). <sup>1</sup>H NMR (CDCl<sub>3</sub>, 400 MHz): δ 7.32-7.26 (m, 5H, Ar), 5.65-5.55 (m, 1H, CH=), 5.05-5.00 (m, 2H, CH<sub>2</sub>=), 4.44 (br.s, 1H, CHAr), 3.52 (br.s, 1H, NH), 2.77-2.70 (m, 1H, CH<sub>a</sub>H<sub>b</sub>), 2.58-2.51 (m, 1H, CH<sub>a</sub>H<sub>b</sub>), 1.21 (s, 9H, *t*Bu) ppm. UV spectrum λ, nm (ε, cm<sup>-1</sup>M<sup>-1</sup>): 258 (152). **NMR spectrum coincides with the literature data<sup>33</sup>.**

**(S)-N-((S)-1-(2-Fluorophenyl)but-3-en-1-yl)-2-methylpropane-2-sulfonamide (3c)**

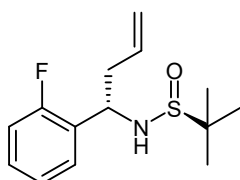

The substance was obtained by variation method №2 (**Table S3**). The compound was purified by flash chromatography with gradient elution (hexane/EtOAc from 8:1 to 1:1) that gave yellow oil. Yield: 90%, *de* >99%, *R<sub>f</sub>* 0.35 (hexane/EtOAc, 1:1). <sup>1</sup>H NMR (CDCl<sub>3</sub>, 400 MHz): δ 7.33 (td, 1H, *J* = 8.6, 1.1 Hz, Ar), 7.28-7.22 (m, 1H, Ar), 7.12 (td, 1H, *J* = 7.5, 1.0 Hz, Ar), 7.06-7.01 (m, 1H, Ar), 5.71-5.61 (m, 1H, CH=), 5.08-5.03 (m, 2H, CH<sub>2</sub>=), 4.70-4.65 (dd, 1H, *J* = 13.6, 6.8 Hz, CHAr), 3.68 (d, 1H, *J* = 6.5 Hz, NH), 2.73-2.66 (m, 1H, CH<sub>a</sub>H<sub>b</sub>), 2.60-2.53 (m, 1H, CH<sub>a</sub>H<sub>b</sub>),

1.21 (s, 9H, *t*Bu) ppm. UV spectrum  $\lambda$ , nm ( $\epsilon$ ,  $\text{cm}^{-1}\text{M}^{-1}$ ): 262 (866), 268 (774). **NMR spectrum coincides with the literature data<sup>34</sup>.**

**(*R*)-*N*-((*R*)-1-(2-Iodophenyl)but-3-en-1-yl)-2-methylpropane-2-sulfinamide (3d)**

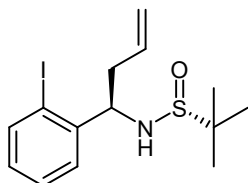

Since the imine configuration **2d** was (*R*) the reaction product **3d** was (*R,R*)-isomer. The substance was obtained by variation method №2 (**Table S3**). The compound was purified by flash chromatography with gradient elution (hexane/EtOAc from 8:1 to 1:1) that gave yellow oil. Yield: 93%, *de* >99%,  $R_f$  0.36 (hexane/EtOAc, 1:1),  $[\alpha]_D^{25}$  -13.5 (*c* 0.2,  $\text{CHCl}_3$ ).  $^1\text{H}$  NMR ( $\text{CDCl}_3$ , 400 MHz):  $\delta$  7.82 (d, 1H,  $J = 7.7$  Hz, Ar), 7.37-7.33 (m, 2H, Ar), 6.98-6.94 (m, 1H, Ar), 5.74-5.63 (m, 1H, CH=), 5.10-5.07 (m, 2H,  $\text{CH}_2=$ ), 4.73 (q, 1H,  $J = 6.1$  Hz, CHAr), 3.76 (d, 1H,  $J = 5.1$  Hz, NH), 2.60 (m, 1H,  $\text{CH}_a\text{H}_b$ ), 1.19 (s, 9H, *t*Bu) ppm.  $^{13}\text{C}$  NMR ( $\text{CDCl}_3$ , 101 MHz):  $\delta$  143.6, 139.8, 133.4, 129.4, 128.5, 128.3, 118.9, 99.5, 61.5, 56.4, 40.6, 22.7 (3C) ppm. UV spectrum  $\lambda$ , nm ( $\epsilon$ ,  $\text{cm}^{-1}\text{M}^{-1}$ ): 258 (833). Anal. Calcd. for  $\text{C}_{14}\text{H}_{20}\text{INOS}$  (377.28): C, 44.57; H, 5.34; N, 3.71; found: C, 44.53; H, 5.41; N, 3.76.

**(*S*)-*N*-((*S*)-1-(2-Chlorophenyl)but-3-en-1-yl)-2-methylpropane-2-sulfinamide (3e)**

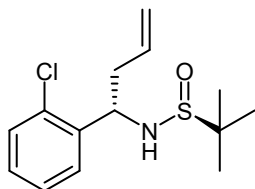

The substance was obtained by variation method №3 (**Table S3**). The compound was purified by flash chromatography with gradient elution (hexane/EtOAc from 8:1 to 1:1) that gave light yellow oil. Yield: 90%, *de* 98%,  $R_f$  0.15 (hexane/EtOAc, 2:1).  $^1\text{H}$  NMR ( $\text{CDCl}_3$ , 400 MHz):  $\delta$  7.40 (dd, 1H,  $J = 7.6, 1.1$  Hz, Ar), 7.33 (dd, 1H,  $J = 7.8, 1.0$  Hz, Ar), 7.28-7.24 (m, 1H, Ar), 7.19 (td, 1H,  $J = 7.6, 1.5$  Hz, Ar), 5.65 (ddt, 1H,  $J = 17.1, 9.2, 7.1$  Hz, CH=), 5.08-5.05 (m, 2H,  $\text{CH}_2=$ ), 4.90 (q, 1H,  $J = 6.2$  Hz, CHAr), 3.77 (d, 1H,  $J = 5.7$  Hz, NH), 2.68-2.56 (m, 1H,  $\text{CH}_a\text{H}_b$ ), 1.19 (s, 9H, *t*Bu) ppm. UV spectrum  $\lambda$ , nm ( $\epsilon$ ,  $\text{cm}^{-1}\text{M}^{-1}$ ): 267 (233). **NMR spectrum coincides with the literature data<sup>32</sup>.**

**(*S*)-*N*-((*S*)-1-(2-Bromophenyl)but-3-en-1-yl)-2-methylpropane-2-sulfinamide (3f)**

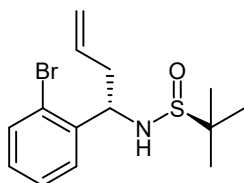

The substance was obtained by variation method №3 (**Table S3**). The compound was purified by flash chromatography with gradient elution (hexane/EtOAc from 8:1 to 1:1) that gave light yellow oil. Yield: 88%, *de* 98%,  $R_f$  0.33 (hexane/EtOAc, 1:1),  $[\alpha]_D^{25} +7.1$  ( $c$  0.2,  $\text{CHCl}_3$ ).  $^1\text{H}$  NMR ( $\text{CDCl}_3$ , 400 MHz):  $\delta$  7.54 (d, 1H,  $J = 8.0$  Hz, Ar), 7.40 (d, 1H,  $J = 7.7$  Hz, Ar), 7.32 (t, 1H,  $J = 7.4$  Hz, Ar), 7.13 (t, 1H,  $J = 7.5$  Hz, Ar), 5.73-5.62 (m, 1H,  $\text{CH}=\text{}$ ), 5.10-5.07 (m, 2H,  $\text{CH}_2=\text{}$ ), 4.89 (q, 1H,  $J = 6.1$  Hz,  $\text{CHAr}$ ), 3.80 (br.d, 1H,  $J = 5.4$  Hz, NH), 2.63 (m, 2H,  $\text{CH}_a\text{H}_b$ ), 1.20 (s, 9H, *t*Bu) ppm.  $^{13}\text{C}$  NMR ( $\text{CDCl}_3$ , 101 MHz):  $\delta$  140.9, 133.5, 133.3, 129.2, 128.8, 127.7, 123.4, 118.9, 57.3, 56.5, 40.5, 22.7 (3C) ppm. UV spectrum  $\lambda$ , nm ( $\epsilon$ ,  $\text{cm}^{-1}\text{M}^{-1}$ ): 258 (274). Anal. Calcd. for  $\text{C}_{14}\text{H}_{20}\text{BrNOS}$  (330.28): C, 50.91; H, 6.10; N, 4.24; found: C, 51.02; H, 6.18; N, 4.05.

**(S)-N-((S)-1-(3-Bromophenyl)but-3-en-1-yl)-2-methylpropane-2-sulfonamide (3g)**

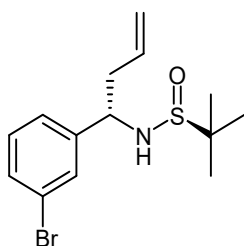

The substance was obtained by variation method №3 (**Table S3**). The compound was purified by flash chromatography with gradient elution (hexane/EtOAc from 8:1 to 1:1) that gave white solid. Yield: 89%, *de* 98%,  $R_f$  0.20 (hexane/EtOAc, 2:1), m.p. 57-58 °C (hexane).  $^1\text{H}$  NMR ( $\text{CDCl}_3$ , 400 MHz):  $\delta$  7.52 (t, 1H, Ar), 7.48 (dt, 1H,  $J = 7.6, 1.8$  Hz, Ar), 7.33-7.28 (m, 2H, Ar), 5.71-5.60 (m, 1H,  $\text{CH}=\text{}$ ), 5.13-5.09 (m, 2H,  $\text{CH}_2=\text{}$ ), 4.47 (dd, 1H,  $J = 11.2, 5.9$  Hz,  $\text{CHAr}$ ), 3.57 (d, 1H,  $J = 4.0$  Hz, NH), 2.81-2.74 (m, 1H,  $\text{CH}_a\text{H}_b$ ), 2.62-2.55 (m, 1H,  $\text{CH}_a\text{H}_b$ ), 1.29 (s, 9H, *t*Bu) ppm. UV spectrum  $\lambda$ , nm ( $\epsilon$ ,  $\text{cm}^{-1}\text{M}^{-1}$ ): 268 (244). **NMR spectrum coincides with the literature data<sup>32</sup>.**

**(S)-2-Methyl-N-((S)-1-(*m*-tolyl)but-3-en-1-yl)propane-2-sulfonamide (3h)**

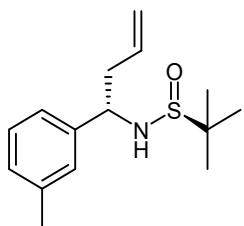

The substance was obtained by variation method №3 (Table S1). The compound was purified by flash chromatography with gradient elution (hexane/EtOAc from 8:1 to 1:1) that gave yellow oil. Yield: 91%, *de* 97%,  $R_f$  0.38 (hexane/EtOAc, 1:1).  $^1\text{H}$  NMR ( $\text{CDCl}_3$ , 400 MHz):  $\delta$  7.24-7.20 (m, 1H, Ar), 7.12-7.07 (m, 3H, Ar), 5.60 (ddt, 1H,  $J = 17.2, 10.1, 7.0$  Hz,  $\text{CH}=\text{}$ ), 5.05-4.99 (m, 2H,  $\text{CH}_2=\text{}$ ), 4.41-4.37 (m, 1H, CHAr), 3.49 (d, 1H,  $J = 3.2$  Hz, NH), 2.75-2.68 (m, 1H,  $\text{CH}_a\text{H}_b$ ), 2.57-2.49 (m, 1H,  $\text{CH}_a\text{H}_b$ ), 2.34 (s, 3H, *m*-Me), 1.21 (s, 9H, *t*Bu) ppm. UV spectrum  $\lambda$ , nm ( $\epsilon$ ,  $\text{cm}^{-1}\text{M}^{-1}$ ): 265 (329). **NMR spectrum coincides with the literature data<sup>35</sup>.**

**(*S*)-*N*-((*S*)-1-(4-Methoxy-2,3-dimethylphenyl)but-3-en-1-yl)-2-methylpropane-2-sulfinamide (3i)**

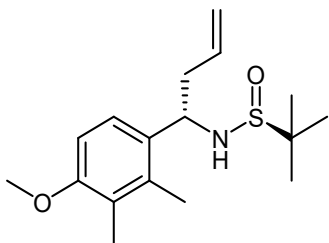

The substance was obtained by variation method №4 (Table S3). The compound was purified by flash chromatography with gradient elution (hexane/EtOAc from 8:1 to 1:1) that gave light yellow oil. Yield: 93%, *de* 98%,  $R_f$  0.20 (hexane/EtOAc, 2:1),  $[\alpha]_D^{25} +46.2$  ( $c$  0.6,  $\text{CHCl}_3$ ).  $^1\text{H}$  NMR ( $\text{CDCl}_3$ , 400 MHz):  $\delta$  7.18 (d, 1H,  $J = 8.6$  Hz, Ar), 6.72 (d, 1H,  $J = 8.6$  Hz, Ar), 5.62 (ddt, 1H,  $J = 17.1, 10.3, 7.1$  Hz,  $\text{CH}=\text{}$ ), 5.08-4.99 (m, 2H,  $\text{CH}_2=\text{}$ ), 4.69 (td, 1H,  $J = 6.8, 3.2$  Hz, CHAr), 3.78 (s, 3H, *p*-OMe), 3.46 (d, 1H,  $J = 3.3$  Hz, NH), 2.73-2.66 (m, 1H,  $\text{CH}_a\text{H}_b$ ), 2.60-2.53 (m, 1H,  $\text{CH}_a\text{H}_b$ ), 2.25 (s, 3H, *m*-Me), 2.14 (s, 3H, *o*-Me), 1.18 (s, 9H, *t*Bu) ppm.  $^{13}\text{C}$  NMR ( $\text{CDCl}_3$ , 101 MHz):  $\delta$  156.7, 135.7, 134.3, 131.6, 125.3, 124.6, 118.0, 107.7, 55.7, 55.4, 54.1, 40.7, 22.7 (3C), 15.3, 12.2 ppm. UV spectrum  $\lambda$ , nm ( $\epsilon$ ,  $\text{cm}^{-1}\text{M}^{-1}$ ): 275 (1125), 283 (1112). Anal. Calcd. for  $\text{C}_{17}\text{H}_{27}\text{N}_2\text{OS}$  (309.47): C, 65.98; H, 8.79; N, 4.53; found: C, 65.84; H, 8.74; N, 4.47.

**(*S*)-*N*-((*S*)-1-(4-Chlorophenyl)but-3-en-1-yl)-2-methylpropane-2-sulfinamide (3j)**

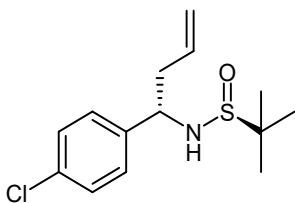

The substance was obtained by variation methodic №3 (**Table S3**). The compound was purified by flash chromatography with gradient elution (hexane/EtOAc from 8:1 to 1:1) that gave yellow oil. Yield: 96%, *de* 98%,  $R_f$  0.20 (hexane/EtOAc, 2:1).  $^1\text{H NMR}$  ( $\text{CDCl}_3$ , 400 MHz):  $\delta$  7.31-7.24 (m, 4H, Ar), 5.63-5.52 (m, 1H, CH=), 5.04-5.00 (m, 1H, CH<sub>2</sub>=), 4.41 (q, 1H,  $J = 3.2$  Hz, CHAr), 3.51 (d, 1H,  $J = 2.3$  Hz, NH), 2.73-2.67 (m, 1H, CH<sub>a</sub>H<sub>b</sub>), 2.53-2.46 (m, 1H, CH<sub>a</sub>H<sub>b</sub>), 1.20 (s, 9H, *t*Bu) ppm. UV spectrum  $\lambda$ , nm ( $\epsilon$ ,  $\text{cm}^{-1}\text{M}^{-1}$ ): 267 (155), 313 (54). **NMR spectrum coincides with the literature data<sup>34</sup>.**

**(S)-2-Methyl-N-((R)-1-phenylhex-5-en-3-yl)propane-2-sulfonamide (3k)**

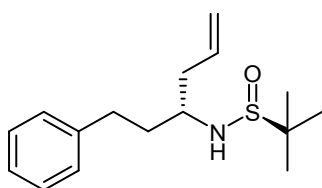

Because of the changing of priority of substituents in **3k** according to *R,S*-nomenclature the sign of the configuration of newly formed chiral center now is *R*. The substance was obtained by variation method №4 (**Table S3**). The compound was purified by flash chromatography with gradient elution (hexane/EtOAc from 8:1 to 1:1) that gave yellow oil. Yield: 93%, *de* 95%,  $R_f$  0.19 (hexane/EtOAc, 2:1).  $^1\text{H NMR}$  ( $\text{CDCl}_3$ , 400 MHz):  $\delta$  7.30-7.26 (m, 2H, Ar), 7.22-7.16 (m, 3H, Ar), 5.82-5.72 (m, 1H, CH=), 5.12-5.08 (m, 2H, CH<sub>2</sub>=), 3.35 (q, 1H,  $J = 6.1$  Hz, CHN), 3.15 (d, 1H,  $J = 3.9$  Hz, NH), 2.73 (t, 2H,  $J = 7.1$  Hz, PhCH<sub>2</sub>CH<sub>2</sub>), 2.33 (m, 2H, CH<sub>2</sub>-CH=CH<sub>2</sub>), 1.91 (q, 2H,  $J = 7.0$  Hz, PhCH<sub>2</sub>CH<sub>2</sub>), 1.19 (s, 9H, *t*Bu) ppm. UV spectrum  $\lambda$ , nm ( $\epsilon$ ,  $\text{cm}^{-1}\text{M}^{-1}$ ): 258 (363). **NMR spectrum coincides with the literature data<sup>34</sup>.**

**(S)-2-Methyl-N-((S,E)-1-phenylhexa-1,5-dien-3-yl)propane-2-sulfonamide (3l)**

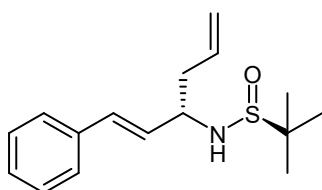

The substance was obtained by variation method №3 (**Table S3**). The compound was purified by flash chromatography with gradient elution (hexane/EtOAc from 8:1 to 1:1) that gave lemon-yellow oil. Yield: 95%, *de* 98%,  $R_f$  0.26 (hexane/EtOAc, 2:1).  $^1\text{H NMR}$  ( $\text{CDCl}_3$ , 400 MHz):  $\delta$  7.39-7.37 (m, 2H, Ar), 7.32-7.28 (m, 2H, Ar), 7.25-7.21 (m, 1H, Ar), 6.61 (d, 1H,  $J = 15.9$  Hz, Ph-CH=CH), 6.21 (dd, 1H,  $J = 15.9, 7.3$  Hz, Ph-CH=CH), 5.80 (ddt, 1H,  $J = 14.6, 9.9, 7.1$  Hz, CH=), 5.16-5.10 (m, 2H, CH<sub>2</sub>=), 4.04 (pent, 1H,  $J = 6.3$  Hz, CHN), 3.33 (d, 1H,  $J = 5.2$  Hz, NH), 2.56-2.41 (m, 2H, CH<sub>a</sub>H<sub>b</sub>), 1.22 (s, 9H, *t*Bu) ppm. UV spectrum  $\lambda$ , nm ( $\epsilon$ ,  $\text{cm}^{-1}\text{M}^{-1}$ ): 201 (16940), 254 (9220). **NMR spectrum coincides with the literature data<sup>36</sup>.**

**(S)-N-((S)-1-(4-Methoxynaphthalen-1-yl)but-3-en-1-yl)-2-methylpropane-2-sulfonamide**

**(3m)**

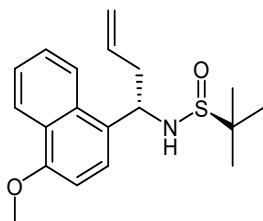

The substance was obtained by variation method №4 (**Table S3**). The compound was purified by flash chromatography with gradient elution (hexane/EtOAc from 8:1 to 1:1) that gave yellow oil. Yield: 70%, *de* 97%,  $R_f$  0.32 (hexane/EtOAc, 1:1),  $[\alpha]_D^{25} +3.4$  ( $c$  0.5,  $\text{CHCl}_3$ ).  $^1\text{H}$  NMR ( $\text{CDCl}_3$ , 400 MHz):  $\delta$  8.33 (d, 1H,  $J = 8.3$  Hz, Ar), 8.14 (d, 1H,  $J = 8.5$  Hz, Ar), 7.57-7.46 (m, 3H, Ar), 6.80 (d, 1H,  $J = 8.1$  Hz, Ar), 5.69 (ddt, 1H,  $J = 14.1, 10.0, 7.0$  Hz,  $\text{CH}=\text{}$ ), 5.18 (br.s, 1H,  $\text{CHAr}$ ), 5.13-5.03 (m, 2H,  $\text{CH}_2=\text{}$ ), 3.97 (s, 3H, OMe), 3.75 (d,  $J = 2.8$  Hz, NH), 2.87 (m, 2H,  $\text{CH}_a\text{H}_b$ ), 1.18 (s, 9H, *t*Bu) ppm.  $^{13}\text{C}$  NMR ( $\text{CDCl}_3$ , 101 MHz):  $\delta$  155.3, 134.3, 131.8, 128.5, 126.9, 125.9, 125.2, 125.1, 123.0, 122.8, 118.3, 103.0, 55.9, 55.5, 53.7, 40.2, 22.7 (3C) ppm. UV spectrum  $\lambda$ , nm ( $\epsilon$ ,  $\text{cm}^{-1}\text{M}^{-1}$ ): 212 (25860), 236 (18350), 299 (4590). Anal. Calcd. for  $\text{C}_{19}\text{H}_{25}\text{NO}_2\text{S}$  (331.47): C, 68.85; H, 7.60; N, 4.23; found: C, 68.87; H, 7.64; N, 4.17.

**(S)-2-Methyl-N-((S)-1-(thiophen-2-yl)but-3-en-1-yl)propane-2-sulfonamide (3n)**

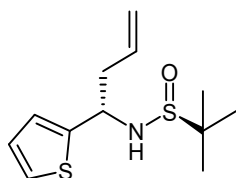

The substance was obtained by variation method №4 (**Table S3**). The compound was purified by flash chromatography with gradient elution (hexane/EtOAc from 8:1 to 1:1) that gave light yellow oil. Yield: 94%, *de* 98%,  $R_f$  0.43 (hexane/EtOAc, 1:1),  $[\alpha]_D^{25} +11.3$  ( $c$  0.4,  $\text{CHCl}_3$ ).  $^1\text{H}$  NMR ( $\text{CDCl}_3$ , 400 MHz):  $\delta$  7.18 (d, 1H,  $J = 5.0$  Hz, thiophene), 7.00 (d, 1H,  $J = 3.1$  Hz, thiophene), 6.90 (t, 1H,  $J = 4.5$  Hz, thiophene), 5.66 (ddt, 1H,  $J = 14.1, 10.1, 7.0$  Hz,  $\text{CH}=\text{}$ ), 5.08-5.02 (m, 2H,  $\text{CH}_2=\text{}$ ), 4.68 (q, 1H,  $J = 6.1$  Hz,  $\text{CHN}$ ), 3.58 (d, 1H,  $J = 4.3$  Hz, NH), 2.77-2.70 (m, 1H,  $\text{CH}_a\text{H}_b$ ), 2.59-2.52 (m, 1H,  $\text{CH}_a\text{H}_b$ ), 1.17 (s, 9H, *t*Bu) ppm.  $^{13}\text{C}$  NMR ( $\text{CDCl}_3$ , 101 MHz): 145.6, 133.5, 126.7, 125.4, 124.9, 118.5, 56.1, 54.6, 41.9, 22.6 (3C) ppm. UV spectrum  $\lambda$ , nm ( $\epsilon$ ,  $\text{cm}^{-1}\text{M}^{-1}$ ): 234 (7200), 325 (130). Anal. Calcd. for  $\text{C}_{12}\text{H}_{19}\text{NOS}_2$  (257.41): C, 55.99; H, 7.44; N, 5.44; found: C, 56.04; H, 7.47; N, 5.51.

**(S)-2-Methyl-N-((S)-1-(4-nitrophenyl)but-3-en-1-yl)propane-2-sulfonamide (3o)**



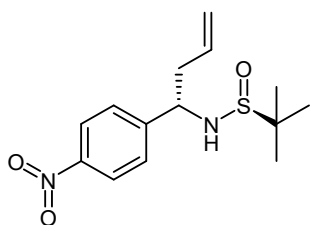

The substance was obtained by variation method №3 (**Table S3**). The compound was purified by flash chromatography with gradient elution (hexane/EtOAc from 8:1 to 1:1) that gave orange solid. Yield: 51%, *de* 98%,  $R_f$  0.27 (hexane/EtOAc, 1:1), m.p. 88-90°C (EtOAc),  $[\alpha]_D^{25} +0.9$  (*c* 0.5, CHCl<sub>3</sub>). <sup>1</sup>H NMR (CDCl<sub>3</sub>, 400 MHz):  $\delta$  8.16 (d, 2H, *J* = 8.5 Hz, Ar), 7.49 (d, 2H, *J* = 8.5 Hz, Ar), 5.57 (ddt, 1H, *J* = 14.2, 10.2, 7.1 Hz, CH=), 5.06-5.01 (m, 2H, CH<sub>2</sub>=), 4.53 (q, 1H, *J* = 6.0 Hz, CHAr), 3.69 (d, 1H, *J* = 4.9 Hz, NH), 2.74-2.67 (m, 1H, CH<sub>a</sub>H<sub>b</sub>), 2.58-2.51 (m, 1H, CH<sub>a</sub>H<sub>b</sub>), 1.20 (s, 9H, *t*Bu) ppm. <sup>13</sup>C NMR (CDCl<sub>3</sub>, 101 MHz):  $\delta$  149.4, 147.4, 132.7, 128.2 (2C), 123.9 (2C), 119.4, 58.3, 56.5, 41.3, 22.6 (3C) ppm. UV spectrum  $\lambda$ , nm ( $\epsilon$ , cm<sup>-1</sup>M<sup>-1</sup>): 273 (9660). Anal. Calcd. for C<sub>14</sub>H<sub>20</sub>N<sub>2</sub>O<sub>3</sub>S (296.39): C, 56.73; H, 6.80; N, 9.45; found: C, 56.61; H, 6.71; N, 9.29.

**(S)-N-((S)-1-(4-(Dimethylamino)phenyl)but-3-en-1-yl)-2-methylpropane-2-sulfonamide (3p)**

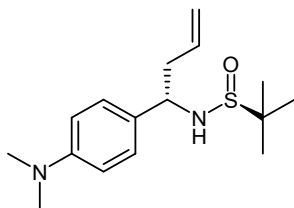

The substance was obtained by variation method №3 (**Table S3**). The compound was purified by flash chromatography with gradient elution (hexane/EtOAc from 8:1 to 1:1) that gave yellow oil. Total yield: 74%, *de* 85%,  $R_f$  0.33 (hexane/EtOAc, 1:1), though diastereomers were not separated by TLC, major isomer was separated by the flash chromatography,  $[\alpha]_D^{25} +97.3$  (*c* 0.1, CHCl<sub>3</sub>). <sup>1</sup>H NMR (CDCl<sub>3</sub>, 400 MHz):  $\delta$  7.18 (d, 2H, *J* = 8.6 Hz, Ar), 6.69 (d, 2H, *J* = 8.6 Hz, Ar), 5.62 (ddt, 1H, *J* = 17.2, 10.2, 7.0 Hz, CH=), 5.05-4.98 (m, 2H, CH<sub>2</sub>=), 4.38-4.34 (m, 1H, CHAr), 3.39 (d, 1H, *J* = 2.8 Hz, NH), 2.94 (s, 6H, NMe<sub>2</sub>), 2.76-2.69 (m, 1H, CH<sub>a</sub>H<sub>b</sub>), 2.55-2.48 (m, 1H, CH<sub>a</sub>H<sub>b</sub>), 1.21 (s, 9H, *t*Bu) ppm. <sup>13</sup>C NMR (CDCl<sub>3</sub>, 101 MHz):  $\delta$  150.2, 134.5, 129.5, 128.2 (2C), 117.8, 112.5 (2C), 58.0, 55.8, 41.0, 40.6, 22.8 (3C) ppm. UV spectrum  $\lambda$ , nm ( $\epsilon$ , cm<sup>-1</sup>M<sup>-1</sup>): 261 (13900), 305 (2190), 398 (410). Anal. Calcd. for C<sub>16</sub>H<sub>26</sub>N<sub>2</sub>OS (294.46): C, 65.26; H, 8.90; N, 9.51; found: C, 65.17; H, 8.91; N, 9.44.

**(S)-N-((S)-1-(2-Hydroxyphenyl)but-3-en-1-yl)-2-methylpropane-2-sulfonamide (3q)**

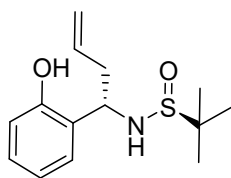

The substance was obtained by variation method №3 (**Table S3**). The isolation of the allylated product **3q** was accomplished according to general procedure, however instead of  $K_2CO_3$  saturated solution  $NaHCO_3$  was used, and the organic extracts were dried over  $Na_2SO_4$ . The compound was purified by flash chromatography with gradient elution (hexane/EtOAc from 8:1 to 1:1) that gave white solid. Yield: 86%, *de* >99%,  $R_f$  0.30 (hexane/EtOAc, 1:1), m.p. 82-83°C (hexane),  $[\alpha]_D^{25}$  -11.3 (*c* 0.3,  $CHCl_3$ ).  $^1H$  NMR ( $CDCl_3$ , 400 MHz):  $\delta$  9.17 (s, 1H, OH), 6.98 (d, 1H, *J* = 7.1 Hz, Ar), 6.75 (t, 1H, *J* = 7.2 Hz, Ar), 6.68 (t, 1H, *J* = 7.2 Hz, Ar), 6.23 (d, 1H, *J* = 7.8 Hz, Ar), 5.71 (ddt, 1H, *J* = 17.2, 10.3, 7.1 Hz,  $CH=$ ), 5.22 (d, 1H, *J* = 9.1 Hz, NH), 5.05-4.98 (m, 2H,  $CH_2=$ ), 4.20 (q, 1H, *J* = 8.2 Hz, CHAr), 2.76-2.68 (m, 1H,  $CH_aH_b$ ), 2.56-2.50 (m, 1H,  $CH_aH_b$ ), 1.29 (s, 9H, *t*Bu) ppm.  $^{13}C$  NMR ( $CDCl_3$ , 101 MHz):  $\delta$  154.9, 135.7, 128.9, 127.8, 127.3, 118.9, 117.0, 116.7, 62.8, 56.7, 41.0, 22.9 (3C) ppm. UV spectrum  $\lambda$ , nm ( $\epsilon$ ,  $cm^{-1}M^{-1}$ ): 273 (2340). Anal. Calcd. for  $C_{14}H_{21}NO_2S$  (267.39): C, 62.89; H, 7.92; N, 5.24; found: C, 62.78; H, 7.99; N, 5.20.

### **(S)-2-Methyl-N-((S)-1-(pyridin-4-yl)but-3-en-1-yl)propane-2-sulfonamide (3r)**

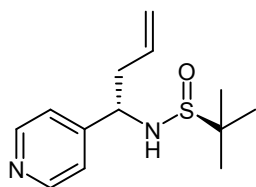

The substance was obtained by variation method №3 (**Table S3**). The compound was purified by flash chromatography with gradient elution (from EtOAc to EtOAc/MeOH 8:1) that gave dark yellow oil. Yield: 83%, *de* 78%,  $R_f$  0.41 (EtOAc/MeOH 8:1).  $^1H$  NMR ( $CDCl_3$ , 400 MHz):  $\delta$  8.59 (d, 2H, *J* = 5.5 Hz, Ar), 7.27 (d, 2H, *J* = 5.5 Hz, Ar), 5.64-5.54 (m, 1H,  $CH=$ ), 5.09-5.04 (m, 2H,  $CH_2=$ ), 4.46 (q, 1H, *J* = 6.1 Hz, CHAr), 3.60 (d, 1H, *J* = 5.0 Hz, NH), 2.73-2.66 (m, 1H,  $CH_aH_b$ ), 2.59-2.52 (m, 1H,  $CH_aH_b$ ), 1.23 (s, 9H, *t*Bu) ppm. UV spectrum  $\lambda$ , nm ( $\epsilon$ ,  $cm^{-1}M^{-1}$ ): 257 (901). **NMR spectrum coincides with the literature data<sup>37</sup>.**

### **(S)-2-Methyl-N-((S)-1-(pyridin-3-yl)but-3-en-1-yl)propane-2-sulfonamide (3s)**

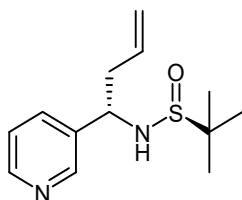

The substance was obtained by variation method №3 (**Table S3**). The compound was purified by flash chromatography with gradient elution (from EtOAc to EtOAc/MeOH 8:1) that gave orange solid. Yield: 65%, *de* 98%,  $R_f$  0.41 (EtOAc/MeOH, 8:1), m.p. 95-97 °C (EtOAc),  $[\alpha]_D^{25} +36.5$  ( $c$  1.0, CHCl<sub>3</sub>). <sup>1</sup>H NMR (CDCl<sub>3</sub>, 400 MHz):  $\delta$  8.45-8.40 (m, 2H, Ar), 7.59 (d, 1H,  $J = 7.4$  Hz, Ar), 7.19-7.16 (m, 1H, Ar), 5.57-5.47 (m, 1H, CH=), 4.97-4.92 (m, 2H, CH<sub>2</sub>=), 4.38 (q, 1H,  $J = 5.0$  Hz, CHAr), 3.81 (d, 1H,  $J = 3.8$  Hz, NH), 2.69-2.63 (m, 1H, CH<sub>a</sub>H<sub>b</sub>), 2.50-2.43 (m, 1H, CH<sub>a</sub>H<sub>b</sub>), 1.12 (s, 9H, *t*Bu) ppm. <sup>13</sup>C NMR (CDCl<sub>3</sub>, 101 MHz):  $\delta$  149.0, 148.7, 137.4, 134.9, 132.9, 123.4, 118.9, 56.5, 56.1, 40.9, 22.5 (3C) ppm. UV spectrum  $\lambda$ , nm ( $\epsilon$ , cm<sup>-1</sup>M<sup>-1</sup>): 261 (1005). Anal. Calcd. for C<sub>13</sub>H<sub>20</sub>N<sub>2</sub>OS (252.38): C, 61.87; H, 7.99; N, 11.10; found: C, 61.75; H, 7.84; N, 11.04.

**(*S,S*)-2-Methyl-*N*-((*S*)-1-(pyridin-2-yl)but-3-en-1-yl)propane-2-sulfonamide ((*S,S*)-3t) and (*R*)-2-methyl-*N*-((*S*)-1-(pyridin-2-yl)but-3-en-1-yl)propane-2-sulfonamide ((*S,R*)-3t)**

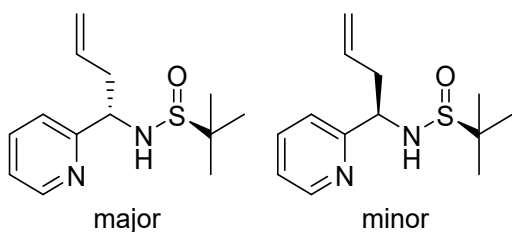

The substances were obtained by variation method №2 (**Table S3**). The compound **3t** was purified by flash chromatography with gradient elution that gave yellow oil. Total yield: 94%, *de* 17%,  $R_f$  0.15 (EtOAc). The impurity of phosphine was removed by acid-base extraction with transformation first **3t** into HCl-salt followed by the extraction of aqueous sol. with Et<sub>2</sub>O impurity. To aqueous layer excess of 20% solution NaOH was added and **3t** was extracted by Et<sub>2</sub>O, dried over K<sub>2</sub>CO<sub>3</sub> and evaporated. The diastereomers were separated by PTLC in MeCN. Both diastereomers slowly oxidize on air. UV spectrum  $\lambda$ , nm ( $\epsilon$ , cm<sup>-1</sup>M<sup>-1</sup>): 261 (1142).

Major isomer (*S,S*)-**3t**: Yellow oil,  $R_f$  0.18 (MeCN),  $[\alpha]_D^{25} +39.5$  ( $c$  0.5, CHCl<sub>3</sub>). <sup>1</sup>H NMR (CDCl<sub>3</sub>, 400 MHz):  $\delta$  8.55 (d, 1H,  $J = 4.5$  Hz, Ar), 7.64 (td, 1H,  $J = 7.7, 1.6$  Hz, Ar), 7.27 (d, 1H,  $J = 6.6$  Hz, Ar), 7.17 (dd, 1H,  $J = 7.0, 5.2$  Hz, Ar), 5.70 (ddt, 1H,  $J = 14.1, 9.4, 7.0$  Hz, CH=), 5.05-5.01 (m, 2H, CH<sub>2</sub>=), 4.84 (d, 1H,  $J = 6.7$  Hz, NH), 4.49 (q, 1H,  $J = 6.6$  Hz, CHAr), 2.59 (m, 1H, CH<sub>a</sub>H<sub>b</sub>), 1.26 (s, 9H, *t*Bu) ppm. <sup>13</sup>C NMR (CDCl<sub>3</sub>, 101 MHz):  $\delta$  160.6, 149.2,

136.7, 134.1, 122.5, 122.0, 118.1, 60.1, 56.3, 42.3, 22.9 (3C) ppm. **NMR spectra coincide with the literature data<sup>38</sup>.**

Minor isomer (*S*,*R*)-**3t**: Yellow oil,  $R_f$  0.11 (MeCN),  $[\alpha]_D^{25} +80.9$  ( $c$  0.5,  $\text{CHCl}_3$ ).  $^1\text{H}$  NMR ( $\text{CDCl}_3$ , 400 MHz):  $\delta$  8.56 (d, 1H,  $J = 4.6$  Hz, Ar), 7.65 (td, 1H,  $J = 7.7, 1.6$  Hz, Ar), 7.27 (d, 1H,  $J = 7.9$  Hz, Ar), 7.18 (dd, 1H,  $J = 7.2, 5.1$  Hz, Ar), 5.68 (ddt, 1H,  $J = 14.4, 10.1, 7.2$  Hz, CH=), 5.14-5.09 (m, 1H,  $\text{CH}_2$ =), 4.56 (q, 1H,  $J = 6.3$  Hz, CHAr), 4.05 (d, 1H,  $J = 4.7$  Hz, NH), 2.76-2.64 (m, 2H,  $\text{CH}_a\text{H}_b$ ), 1.18 (s, 9H, *t*Bu) ppm.  $^{13}\text{C}$  NMR ( $\text{CDCl}_3$ , 101 MHz):  $\delta$  160.8, 149.4, 136.7, 133.9, 122.6, 122.1, 119.3, 59.4, 56.1, 42.0, 22.7 (3C) ppm. Anal. Calcd. for  $\text{C}_{13}\text{H}_{20}\text{N}_2\text{OS}$  (252.38): C, 61.87; H, 7.99; N, 11.10; found: C, 61.74; H, 8.01; N, 10.91.

**(*S*)-2-Methyl-*N*-((*S*)-1-(6-methylpyridin-2-yl)but-3-en-1-yl)propane-2-sulfinamide ((*S*,*S*)-**3u**) and (*S*)-2-methyl-*N*-((*R*)-1-(6-methylpyridin-2-yl)but-3-en-1-yl)propane-2-sulfinamide ((*S*,*R*)-**3u**)**

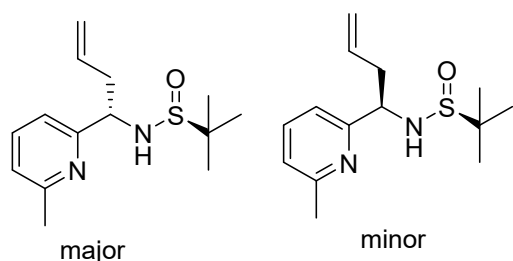

The substances were obtained by variation method №3 (Table S3). The compound **3u** was purified by flash chromatography with gradient elution that gave yellow oil. Total yield: 89%, *de* 29%,  $R_f$  0.23 (EtOAc). The diastereomers were separated by PTLC in MeCN. Both diastereomers slowly oxidize on air. UV spectrum  $\lambda$ , nm ( $\epsilon$ ,  $\text{cm}^{-1}\text{M}^{-1}$ ): 265 (4540).

Major isomer (*S*,*S*)-**3u**: Yellow oil,  $R_f$  0.24 (MeCN),  $[\alpha]_D^{25} +24.6$  ( $c$  0.6,  $\text{CHCl}_3$ ).  $^1\text{H}$  NMR ( $\text{CDCl}_3$ , 400 MHz):  $\delta$  7.50 (t, 1H,  $J = 7.0$  Hz, Ar), 7.02 (dd, 2H,  $J = 21.9, 7.5$  Hz, Ar), 5.69 (ddt, 1H,  $J = 17.3, 10.3, 7.0$  Hz, CH=), 5.10 (br.s, 1H, NH), 5.03-4.99 (m, 2H,  $\text{CH}_2$ =), 4.44 (q, 1H,  $J = 6.5$  Hz, CHAr), 2.56 (m, 2H,  $\text{CH}_a\text{H}_b$ ), 2.50 (s, 3H, Me), 1.24 (s, 9H, *t*Bu) ppm.  $^{13}\text{C}$  NMR ( $\text{CDCl}_3$ , 101 MHz):  $\delta$  159.6, 157.6, 137.0, 134.3, 122.0, 118.8, 117.9, 59.7, 56.2, 42.2, 24.4, 22.9 (3C) ppm. Anal. Calcd. for  $\text{C}_{14}\text{H}_{22}\text{N}_2\text{OS}$  (266.40): C, 63.12; H, 8.32; N, 10.52; found: C, 62.98; H, 8.34; N, 10.34.

Minor isomer (*S*,*R*)-**3u**: White solid,  $R_f$  0.15 (MeCN), m.p. 84-86°C (hexane),  $[\alpha]_D^{25} +121.0$  ( $c$  0.4,  $\text{CHCl}_3$ ).  $^1\text{H NMR}$  ( $\text{CDCl}_3$ , 400 MHz):  $\delta$  7.51 (t, 1H, Ar), 7.03 (dd, 2H, Ar), 5.69 (ddt, 1H, CH=), 5.14-5.08 (m, 2H,  $\text{CH}_2$ =), 4.51 (q, 1H, CHAr), 4.09 (d, 1H, NH), 2.74-2.58 (m, 2H,  $\text{CH}_a\text{H}_b$ ), 2.51 (s, 3H, 6-Me), 1.18 (s, 9H, *t*Bu) ppm.  $^{13}\text{C NMR}$  ( $\text{CDCl}_3$ , 101 MHz):  $\delta$  160.2, 158.2, 136.7, 134.2, 122.0, 119.1, 118.7, 59.3, 56.1, 42.2, 24.5, 22.7 (3C) ppm. Anal. Calcd. for  $\text{C}_{14}\text{H}_{22}\text{N}_2\text{OS}$  (266.40): C, 63.12; H, 8.32; N, 10.52; found: C, 63.19; H, 8.35; N, 10.48.

**(*S*)-*N*-((*S*)-1-(1-Ethyl-1*H*-pyrazol-4-yl)but-3-en-1-yl)-2-methylpropane-2-sulfinamide (**3v**)**

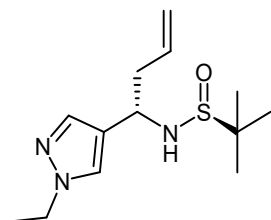

The substance was obtained by variation method №3 (**Table S3**). The compound was purified by flash chromatography with gradient elution (from EtOAc to EtOAc/MeOH 1:1) that gave yellow oil. Yield: 73%, *de* 93%,  $R_f$  0.23 (EtOAc).  $^1\text{H NMR}$  ( $\text{CDCl}_3$ , 400 MHz):  $\delta$  7.46 (s, 1H, Ar), 7.43 (s, 1H, Ar), 5.78-5.68 (m, 1H, CH=), 5.11-5.06 (m, 2H,  $\text{CH}_2$ =), 4.44 (q, 1H,  $J = 6.3$  Hz, CHN), 4.11 (q, 2H,  $J = 7.3$  Hz,  $\text{CH}_2\text{CH}_3$ ), 3.34 (d, 1H,  $J = 5.4$  Hz, NH), 2.65-2.53 (m, 2H,  $\text{CH}_a\text{H}_b$ ), 1.45 (t, 3H,  $J = 7.3$  Hz,  $\text{CH}_2\text{CH}_3$ ), 1.20 (s, 9H, *t*Bu) ppm. UV spectrum  $\lambda$ , nm ( $\epsilon$ ,  $\text{cm}^{-1}\text{M}^{-1}$ ): 269 (830). **NMR spectrum coincides with the literature data<sup>5</sup>.**

**(*S*)-2-Methyl-*N*-((*S*)-1-(1-phenyl-1*H*-pyrazol-4-yl)but-3-en-1-yl)propane-2-sulfinamide (**3w**)**

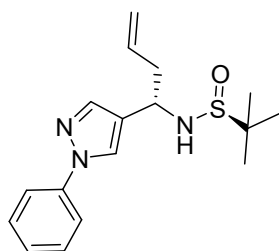

The substance was obtained by variation methodic №3 (**Table S3**). The compound was purified by flash chromatography with gradient elution (from hexane to EtOAc) that gave yellow oil. Yield: 92%, *de* 92%,  $R_f$  0.26 (hexane/EtOAc, 1:1).  $^1\text{H NMR}$  ( $\text{CDCl}_3$ , 400 MHz):  $\delta$  8.03 (s, 1H,  $\text{CH}_{\text{pyr}}$ ), 7.68 (s, 2H, Ph), 7.66 (s, 1H,  $\text{CH}_{\text{pyr}}$ ), 7.43 (t, 2H,  $J = 7.4$  Hz, Ph), 7.27 (t, 1H,  $J = 7.4$  Hz, Ph), 5.84-5.74 (m, 1H, CH=), 5.17-5.11 (m, 2H,  $\text{CH}_2$ =), 4.55 (unresolved t, 1H, CHAr), 3.43 (br.s, 1H, NH), 2.73-2.61 (m, 2H,  $\text{CH}_a\text{H}_b$ ), 1.24 (s, 9H, *t*Bu) ppm. UV spectrum  $\lambda$ , nm ( $\epsilon$ ,  $\text{cm}^{-1}\text{M}^{-1}$ ): 261 (16180). **NMR spectrum coincides with the literature data<sup>5</sup>.**

**Modified procedure for allylation of 2-pyridinic Ellman's imines (**2t,u**)**

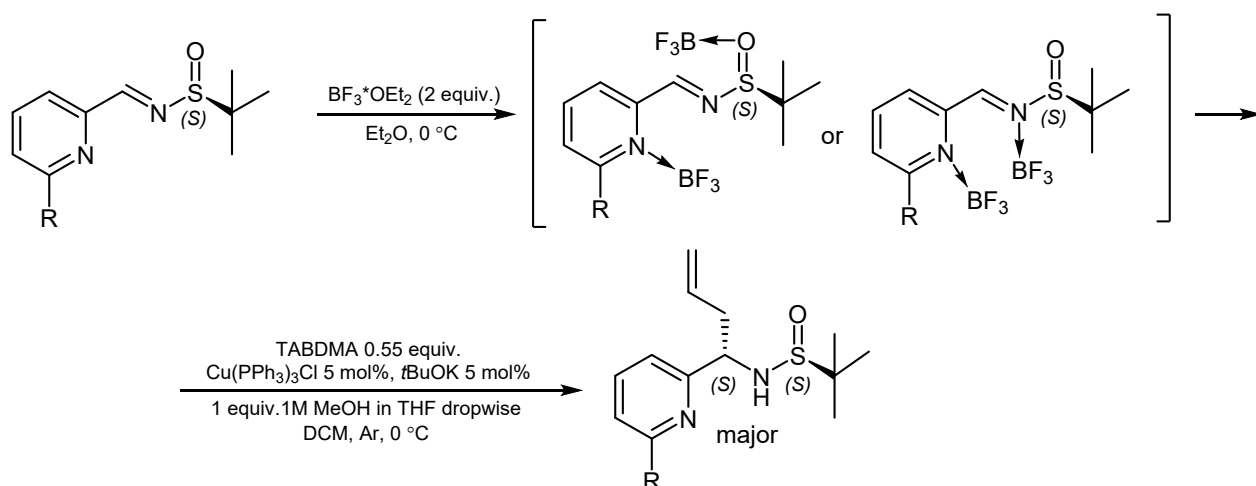

A 25 ml 2-necks pear-shaped flask was charged with a solution of **2t** or **2u** (1.0 mmol) in Et<sub>2</sub>O (2 ml) under Ar atm., cooled to 0 °C and BF<sub>3</sub>\*OEt<sub>2</sub> (248 μl, 2.0 equiv.) was added dropwise with stirring to produce light orange precipitate. The suspension was stirred for 30 minutes, after that solvent was evaporated under reduced pressure and the flask was refilled with Ar. To the solid was added Cu(PPh<sub>3</sub>)<sub>3</sub>Cl [**Cu-3**] (44.3 mg, 0.05 mmol, 5 mol%), followed by DCM (3 ml), and the resulting solution was cooled to 0 °C in an ice bath. To the stirred solution 0.8M *t*BuOK stock solution in THF (62.5 μl, 0.05 mmol) was added followed by TABDMA **1c** (179 mg, 0.55 mmol). To the reaction mixture 1M solution of MeOH in anhydrous THF (1.0 ml, 1.0 mmol) was slowly injected through the septum by Syringe Pump over 30 minutes. After the completion of the addition, the mixture was stirred for 30 minutes and quenched with glacial AcOH (286 μl, 5.0 mmol). After evaporated the residue was treated with a mixture of EDTA (180 mg, 0.6 mmol), K<sub>2</sub>CO<sub>3</sub> (4.08 g, 30 mmol), H<sub>2</sub>O (15 ml) and EtOAc (9 ml) with stirred for 30 min. The organic layer was separated, aqueous layer was extracted by EtOAc (3x9 ml), and combined extracts were dried over K<sub>2</sub>CO<sub>3</sub> and evaporated. Determination of *de* was conducted by the analysis of NMR spectra of the crude reaction mixture (for **3t** R = H, *de* = 82%; for **3u** R = Me, *de* = 90%), yields were 32% and 36% correspondingly.

### Gram-Scale Allylation of Salicylic imine **2q** for synthesis of **7**.

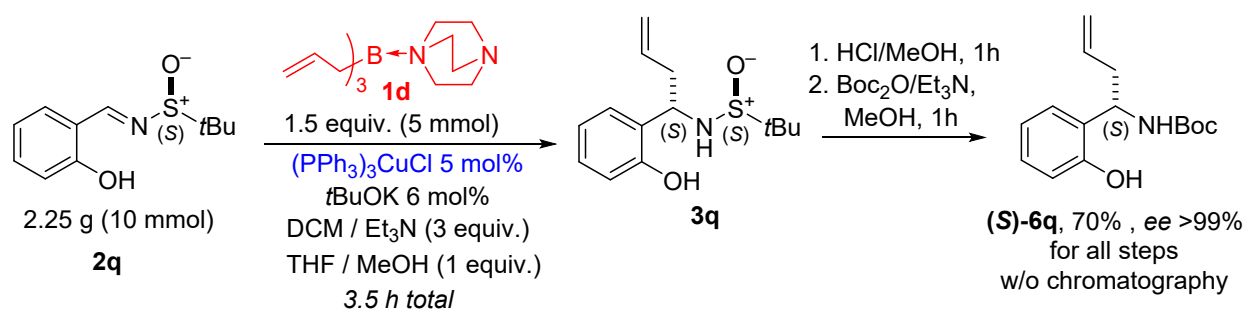

Imine **2q** (2.25 g, 10.0 mmol), catalyst [**Cu-3**] (0.442 g, 0.5 mmol) was dissolved in DCM (17 ml) under Ar and to the solution at -10 °C was injected solution of *t*BuOK (0.8 M in THF, 0.63

ml, 0.5 mmol) giving an orange colored solution. The mixture was cooled to -15 °C, Et<sub>3</sub>N (3.02 g, 4.18 ml, 30.0 mmol) and adduct **1d** (1.23 g, 5.0 mmol) were added followed by stirring for 1.5 h at this temperature. To the formed mixture was added via syringe pump a solution of MeOH (0.32 g, 0.4 ml, 10.0 mmol) in THF (8 ml) for 1 h and after completion of the addition the mixture was stirred for another 1 h followed by quenching with AcOH (3.0 ml, 50.0 mmol) at -20 °C, diluted with EtOAc (15 ml) and a mixture of solution of K<sub>2</sub>CO<sub>3</sub> and 25% aq.NH<sub>3</sub> for copper extraction. Organic layer was separated and washed with a mixture of brine with 25% aq.NH<sub>3</sub> several times until blue coloration is disappeared. The resulting extract was dried over MgSO<sub>4</sub>, evaporated to give crude **3q**. The resulting oil was dissolved in MeOH (10 ml) and treated with 4M HCl in dioxane (12.0 ml, 48.0 mmol), the progress of the reaction was monitored by TLC. After completion of the deprotection MeOH was evaporated under reduced pressure. The residue was dissolved in water (15 ml) and extracted with DCM (7 ml x 5). Water was removed under reduced pressure to give semisolid of homoallylamine hydrochloride. It was dissolved in MeOH (10 ml) with Et<sub>3</sub>N (3.53 g, 4.9 ml, 35.0 mmol) and Boc<sub>2</sub>O (3.27 g, 15.0 mmol) was added portionwise. Self-heating reaction was quickly developed and the Boc-protection was cleanly completed within 1 h. The solvent was evaporated to dryness and the residue was suspended in a mixture Et<sub>2</sub>O/*n*-hexane, filtered and washed with NaCl<sub>sat.</sub> two times, dried over Na<sub>2</sub>SO<sub>4</sub> and concentrated under reduced pressure. During the concentration crystalline solid was precipitated, the resulting suspension was chilled to 0 °C, filtered and washed with chilled (-10 °C) *n*-hexane to give (**S**)-**6q** (1.84 g, 70%) as beige solid, m.p. 129-130 °C (*n*-hexane), [α]<sub>D</sub><sup>20</sup> -55.9 (C 1.0, CHCl<sub>3</sub>), HPLC: *ee* >99%. (Description of NMR spectra see for *rac*-**6q**).

***tert*-Butyl *N*-[(*S*)-4-Hydroxy-1-(2-hydroxyphenyl)butyl]carbamate (**7**)**

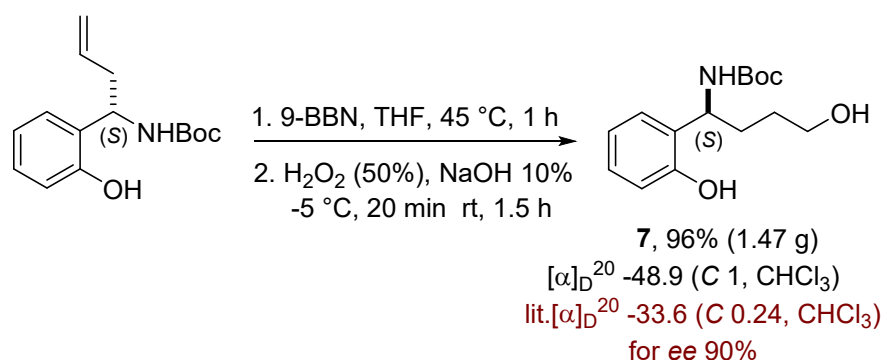

To a solution of (**S**)-**6q** (1.45 g, 5.5 mmol) in THF (10 ml) was added solid 9-BBN (1.71 g, 14.0 mmol) at 15 °C and the suspension was stirred for 20 min until complete dissolution with evolution of hydrogen. The solution was heated at 45 °C for 1 h until no more starting material was visible on TLC (EtOAc/*n*-hexane, 1:1). The reaction mixture was cooled to -5 °C, NaOH 10% (14 g, 35.0 mmol) was added and H<sub>2</sub>O<sub>2</sub> (50%) (2.86 g, 2.39 ml, 42.0 mmol) was injected by

dropwise at -5-+5 °C with intense stirring. After complete addition the mixture was stirred at ambient temperature for 1.5 h. The reaction mixture was diluted with water and EtOAc. Aqueous layer was extracted with EtOAc (10 ml x 3), combined extracts were washed with NaCl<sub>sat</sub>, dried over MgSO<sub>4</sub>, filtered, evaporated and subjected to FC (EtOAc/*n*-hexane in gradient 12% to 100%) to give **7** (1.48 g, 96%) as viscous transparent mass,  $[\alpha]_D^{20}$  -48.9 (C 1.0, CHCl<sub>3</sub>), (lit.<sup>39</sup>  $[\alpha]_D^{20}$  -33.6 (C 0.24, CHCl<sub>3</sub>),  $R_f$  0.27 (EtOAc/*n*-hexane, 1:1). <sup>1</sup>H NMR (CDCl<sub>3</sub>, 400 MHz):  $\delta$  7.07 (t,  $J$  = 7.3 Hz, 2H, both *m*-CH), 6.81 (t,  $J$  = 8.0 Hz, 2H, *o,p*-CH), 5.57 (br. s, 3H, 2OH and NH), 4.78 (br. s, 1H, CHNH), 3.64 (t,  $J$  = 6.0 Hz, 2H, CH<sub>2</sub>OH), 1.90 (dd,  $J$  = 14.2, 7.0 Hz, 2H, CH<sub>2</sub>CHNH), 1.68–1.48 (m, 2H, CH<sub>2</sub>CH<sub>2</sub>OH), 1.42 (s, 9H, *t*Bu). <sup>13</sup>C NMR (CDCl<sub>3</sub>, 101 MHz):  $\delta$  157.0 (C=O), 154.6 (C-OH), 128.5 2C (*m*-CH), 127.2(C), 120.1(*p*-CH), 116.9 (*o*-CH), 80.5 (OCMe<sub>3</sub>), 62.3 (CH<sub>2</sub>OH), 50.6 br. (CHNH), 31.5 (CH<sub>2</sub>CHNH), 29.4 (CH<sub>2</sub>CH<sub>2</sub>OH, 28.5 3C (3Me). **NMR spectra coincides with the literature data.**<sup>39</sup>

### General procedure for synthesis of *N*-Boc-amides for chiral HPLC analysis

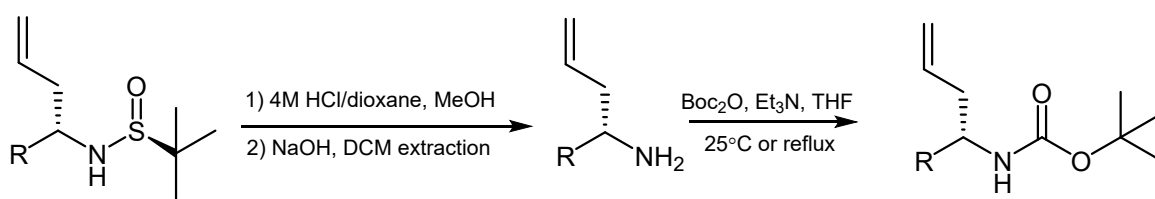

A 5 ml flask was charged with the mixture of allylated compounds (~0.15 mmol), dissolved in MeOH (0.15 ml) and stirred with 4 equiv. of 4M HCl solution in dioxane (0.15 ml, 0.6 mmol) at r.t. for 1 hour. The hydrolysis was controlled by the disappearing of allylated sulfonamide on TLC (hexane/EtOAc, 1:1), after that the solution was evaporated. The hydrochloride salt was dissolved in water (3 ml) and extracted with DCM (3x3 ml) to remove all organic impurities. The water layer was treated with 20% NaOH solution (0.15 ml, 0.9 mmol) and homoallylamine was extracted with DCM (3x3 ml). The organic layer was dried with K<sub>2</sub>CO<sub>3</sub> and evaporated. The amine was dissolved in THF (0.5 ml), Boc<sub>2</sub>O (0.038 ml, 1.1 equiv., 0.165 mmol) and Et<sub>3</sub>N (0.021 ml, 1.0 equiv., 0.15 mmol) were added. The solution was refluxed for 30 min until the desired amine converted into Boc-amide. The progress of the reaction was monitored by TLC (hexane/EtOAc, 4:1). For the pyridinic and salicylic amines the reaction with Boc<sub>2</sub>O was conducted at r.t. The resulting solution of *N*-Boc-amide was evaporated, purified by flash chromatography and subjected to chiral HPLC analysis. The conditions of chiral chromatography are indicated in the chromatography section.

### General procedure for synthesis of racemic *N*-Boc-homoallylamides as HPLC standards (6a-w).



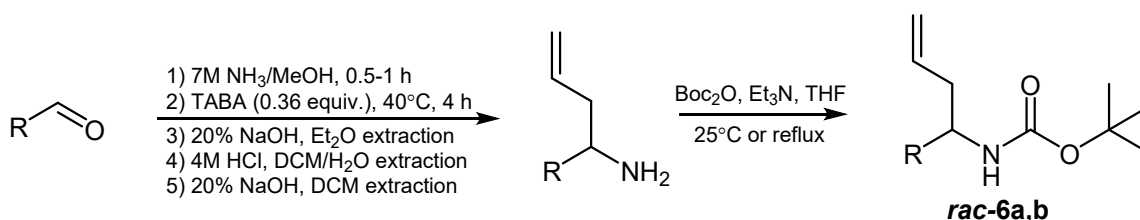

Carbonyl compound (1.0 mmol) was dissolved in 7 M NH<sub>3</sub> solution in MeOH (4 mmol), and the solution was stirred for 30 min, after then TABA **1b** (0.36 mmol) was added, and the resulting mixture was left for 4 h at 40 °C. The reaction was monitored by <sup>1</sup>H and <sup>11</sup>B NMR. After the imine's signals were disappeared the reaction mixture was concentrated on the Rotavapor under reduced pressure. The residue was treated with 20% NaOH and extracted with Et<sub>2</sub>O (8 ml x 3). The combined extracts were washed with alkaline NaCl sol., dried over K<sub>2</sub>CO<sub>3</sub>, filtered. To the etheral extracts was added 4 M HCl in dioxane (1.0-1.5 mmol), the precipitated hydrochloride salt was collected by filtration, washed with Et<sub>2</sub>O and dried in vacuum. Pyridinic homoallylamines were treated with oxalic acid solution in MeOH instead of HCl. Next, homoallylamine hydrochloride or oxalate salt was treated by 20% NaOH and corresponding amine was extracted by DCM (8 ml x 3), dried over K<sub>2</sub>CO<sub>3</sub>, and organic extracts were evaporated. The amine was dissolved in THF (5 ml), Boc<sub>2</sub>O (0.25 ml, 1.1 equiv., 1.1 mmol) and Et<sub>3</sub>N (0.14 ml, 1.0 mmol) were added. The solution was refluxed for 30 min until disappearance of the homoallylamine. A progress of the reaction was monitored by TLC (hexane/EtOAc, 4:1). For the pyridinic and salicylic homoallylamines the reaction with Boc<sub>2</sub>O was conducted at r.t. The solution of *N*-Boc-amide was evaporated again, and purified by flash chromatography.

***tert*-Butyl-(1-(2-bromo-4-fluorophenyl)but-3-en-1-yl)carbamate (*rac*-6a)**

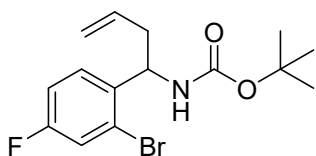

White solid, R<sub>f</sub> 0.32 (hexane/EtOAc, 8:1). Proton NMR spectrum contains signals of two rotamers 2.5:1. First meaning is for major rotamer. <sup>1</sup>H NMR (CDCl<sub>3</sub>, 400 MHz): δ 7.28 (dd, 1H, *J* = 8.2, 2.5 Hz, Ar), 7.24 (br.s, 1H, Ar), 7.01 (td, 1H, *J* = 8.4, 2.4 Hz, Ar), 5.73-5.63 (m, 1H, CH=), 5.16-5.12 (m, 2H, CH<sub>2</sub>=), 5.02 (br.s, 2H, CHAr and NH), 2.52 (br.s, 1H, CH<sub>a</sub>CH<sub>b</sub>), 2.39 (br.s, 1H, CH<sub>a</sub>CH<sub>b</sub>), 1.40 and 1.27 (both br.s, 9H, *t*Bu) ppm. <sup>13</sup>C NMR (CDCl<sub>3</sub>, 101 MHz): δ 162.6 and 160.1 (*J*<sub>CF</sub> = 249.7 Hz), 155.0, 137.6 and 137.5 (*J*<sub>CF</sub> = 6.2 Hz), 133.4, 128.2 and 128.1 (*J*<sub>CF</sub> = 8.8 Hz), 122.7 and 122.6 (*J*<sub>CF</sub> = 4.9 Hz), 120.5 and 120.3 (*J*<sub>CF</sub> = 22.4 Hz), 119.0, 114.8 and 114.6 (*J*<sub>CF</sub> = 21.4 Hz), 80.0, 53.0, 39.6, 28.4 (3C) ppm. UV spectrum λ, nm (ε, cm<sup>-1</sup>M<sup>-1</sup>): 268 (1026), 275 (963). Anal. Calcd. for C<sub>15</sub>H<sub>19</sub>BrFNO<sub>2</sub> (344.22): C, 52.34; H, 5.56; N, 4.07; found: C, 52.22; H, 5.67; N, 4.00.

***tert*-Butyl-(1-phenylbut-3-en-1-yl)carbamate (*rac*-6b)**

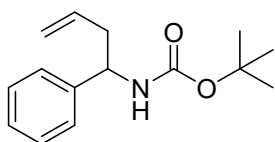

White solid,  $R_f$  0.39 (hexane/EtOAc, 8:1).  $^1\text{H}$  NMR ( $\text{CDCl}_3$ , 400 MHz):  $\delta$  7.34-7.31 (m, 2H, Ar), 7.27-7.24 (m, 3H, Ar), 5.73-5.63 (m, 1H, CH=), 5.13-5.06 (m, 2H, CH<sub>2</sub>=), 4.86 (br.s., 1H, NH), 4.73 (br.s., 1H, CHAr), 2.52 (s, 2H, CH<sub>a</sub>H<sub>b</sub>), 1.41 (s, 9H, *t*Bu) ppm. UV spectrum  $\lambda$ , nm ( $\epsilon$ ,  $\text{cm}^{-1}\text{M}^{-1}$ ): 258 (218). **NMR spectrum coincides with the literature data<sup>40</sup>.**

***tert*-Butyl-(1-(2-fluorophenyl)but-3-en-1-yl)carbamate (*rac*-6c)**

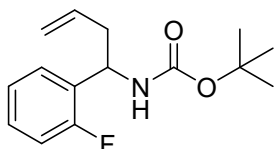

White solid,  $R_f$  0.40 (hexane/EtOAc, 8:1).  $^1\text{H}$  NMR ( $\text{CDCl}_3$ , 400 MHz):  $\delta$  7.24-7.19 (m, 2H, Ar), 7.08 (t, 1H,  $J = 7.5$  Hz, Ar), 7.04-6.99 (m, 1H, Ar), 5.72-5.61 (m, 1H, CH=), 5.11-5.04 (m, 2H, CH<sub>2</sub>=), 4.95 (br.d, 2H,  $J = 5.4$  Hz, CHAr and NH), 2.52 (br.s, 2H, CH<sub>a</sub>H<sub>b</sub>), 1.41 (s, 9H, *t*Bu) ppm. UV spectrum  $\lambda$ , nm ( $\epsilon$ ,  $\text{cm}^{-1}\text{M}^{-1}$ ): 262 (545). **NMR spectrum coincides with the literature data<sup>41</sup>.**

***tert*-Butyl-(1-(2-iodophenyl)but-3-en-1-yl)carbamate (*rac*-6d)**

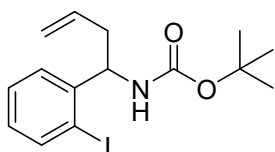

White solid,  $R_f$  0.30 (hexane/EtOAc, 8:1). Proton NMR spectrum contains signals of two rotamers 1.5:1. First meaning is for major rotamer.  $^1\text{H}$  NMR ( $\text{CDCl}_3$ , 400 MHz):  $\delta$  7.81 (d, 1H,  $J = 7.8$  Hz, Ar), 7.31 (t, 1H,  $J = 7.6$  Hz, Ar), 7.23 (br.s, 1H, Ar), 6.93 (t, 1H,  $J = 7.6$  Hz, Ar), 5.77-5.67 (m, 1H, CH=), 5.18-5.12 (m, 2H, CH<sub>2</sub>=), 5.04 (br.d, 1H,  $J = 5.6$  Hz, CHAr), 4.93 and 4.81 (both br.s, 1H, NH), 2.53-2.36 (m, 2H, CH<sub>a</sub>H<sub>b</sub>), 1.41 and 1.25 (s, 9H, *t*Bu) ppm.  $^{13}\text{C}$  NMR spectrum contains signals of rotamers.  $^{13}\text{C}$  NMR ( $\text{CDCl}_3$ , 101 MHz): 155.0, (145.4 and 144.5), (140.0 and 139.7), 133.6, 128.9, 128.4, 126.6, 118.8, 98.6, 79.8, (59.2 and 57.8), 39.9, 28.4 (3C). UV spectrum  $\lambda$ , nm ( $\epsilon$ ,  $\text{cm}^{-1}\text{M}^{-1}$ ): 225 (749). Anal. Calcd. for  $\text{C}_{15}\text{H}_{20}\text{INO}_2$  (373.23): C, 48.27; H, 5.40; N, 3.75; found: C, 48.20; H, 5.45; N, 3.73.

***tert*-Butyl-(1-(2-chlorophenyl)but-3-en-1-yl)carbamate (*rac*-6e)**

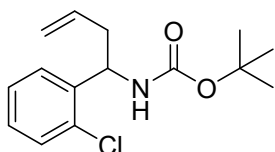

White solid,  $R_f$  0.34 (hexane/EtOAc, 8:1). Proton NMR spectrum contains signals of two rotamers 2.5:1. First meaning is for major rotamer.  $^1\text{H}$  NMR ( $\text{CDCl}_3$ , 400 MHz):  $\delta$  7.38-7.18 (m,

4H, Ar), 5.79-5.65 (m, 1H, CH=), 5.19-5.13 (m, 4H, CH<sub>2</sub>= and CHAr and NH), 2.54 (br.d, 2H,  $J = 29.2$  Hz, CH<sub>a</sub>H<sub>b</sub>), 1.45 and 1.29 (both s, 9H, *t*Bu) ppm. UV spectrum  $\lambda$ , nm ( $\epsilon$ , cm<sup>-1</sup>M<sup>-1</sup>): 265 (310). **NMR spectrum coincides with the literature data<sup>42</sup>.**

***tert*-Butyl-(1-(2-bromophenyl)but-3-en-1-yl)carbamate (*rac*-6f)**

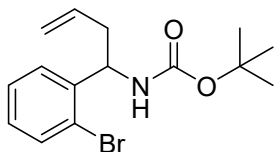

White solid,  $R_f$  0.40 (hexane/EtOAc, 4:1). Proton NMR spectrum contains signals of two rotamers 3:1. First meaning is for major rotamer. <sup>1</sup>H NMR (CDCl<sub>3</sub>, 400 MHz):  $\delta$  7.54 (d, 1H,  $J = 7.3$  Hz, Ar), 7.27 (m, 2H, Ar), 7.11 (m, 1H, Ar), 5.77-5.67 (m, 1H, CH=), 5.18-5.13 (m, 2H, CH<sub>2</sub>=), 5.05 (br.s, 2H, CHAr and NH), 2.57 (br.s, 1H, CH<sub>a</sub>H<sub>b</sub>), 2.44 (br.s, 1H, CH<sub>a</sub>H<sub>b</sub>), 1.42 and 1.27 (both br.s, 9H, *t*Bu) ppm. UV spectrum  $\lambda$ , nm ( $\epsilon$ , cm<sup>-1</sup>M<sup>-1</sup>): 264 (152). **NMR spectrum coincides with the literature data<sup>43</sup>.**

***tert*-Butyl-(1-(3-bromophenyl)but-3-en-1-yl)carbamate (*rac*-6g)**

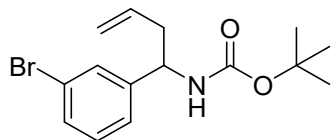

Colorless oil,  $R_f$  0.39 (hexane/EtOAc, 8:1). <sup>1</sup>H NMR (CDCl<sub>3</sub>, 400 MHz):  $\delta$  7.40 (s, 1H, Ar), 7.38-7.36 (m, 1H, Ar), 7.19 (d, 2H,  $J = 4.8$  Hz, Ar), 5.64 (ddt, 1H,  $J = 17.2, 10.2, 7.1$  Hz, CH=), 5.15-5.10 (m, 2H, CH<sub>2</sub>=), 4.87 (br.s, 1H, CH), 4.70 (br.s, 1H, NH), 2.50-2.47 (m, 2H, CH<sub>a</sub>H<sub>b</sub>), 1.42 (s, 9H, *t*Bu) ppm. UV spectrum  $\lambda$ , nm ( $\epsilon$ , cm<sup>-1</sup>M<sup>-1</sup>): 267 (277). **NMR spectrum coincides with the literature data<sup>44</sup>.**

***tert*-Butyl-(1-(*m*-tolyl)but-3-en-1-yl)carbamate (*rac*-6h)**

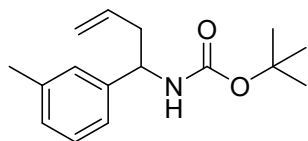

White solid,  $R_f$  0.46 (hexane/EtOAc, 8:1). <sup>1</sup>H NMR (CDCl<sub>3</sub>, 400 MHz):  $\delta$  7.21 (t, 1H,  $J = 7.6$  Hz, Ar), 7.20-7.07 (m, 3H, Ar), 5.68 (ddt, 1H,  $J = 14.3, 9.6, 6.9$  Hz, CH=), 5.13-5.06 (m, 2H, CH<sub>2</sub>=), 4.86 (br.s, 1H, CHAr), 4.70 (br.s, 1H, NH), 2.51 (br.s, 2H, CH<sub>a</sub>H<sub>b</sub>), 2.34 (s, 3H, *m*-Me), 1.42 (s, 9H, *t*Bu) ppm. <sup>13</sup>C NMR (CDCl<sub>3</sub>, 101 MHz): 155.3, 142.5, 138.2, 134.3, 128.5, 128.0, 127.2, 123.3, 118.2, 79.6, 54.2, 41.4, 28.5 (3C), 21.6 ppm. UV spectrum  $\lambda$ , nm ( $\epsilon$ , cm<sup>-1</sup>M<sup>-1</sup>): 264 (246). Anal. Calcd. for C<sub>16</sub>H<sub>23</sub>NO<sub>2</sub> (261.37): C, 73.53; H, 8.87; N, 5.36; found: C, 73.41; H, 8.90; N, 5.34.

***tert*-Butyl-(1-(4-methoxy-2,3-dimethylphenyl)but-3-en-1-yl)carbamate (*rac*-6i)**

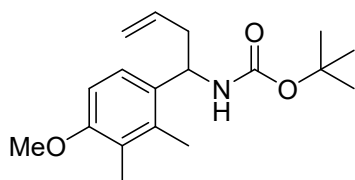

White solid,  $R_f$  0.27 (hexane/EtOAc, 8:1).  $^1\text{H}$  NMR ( $\text{CDCl}_3$ , 400 MHz):  $\delta$  7.04 (d, 1H,  $J = 8.6$  Hz, Ar), 6.70 (d, 1H,  $J = 8.5$  Hz, Ar), 5.76-5.66 (m, 1H, CH=), 5.14-5.05 (m, 2H,  $\text{CH}_2$ =), 4.97 (br.s., 1H, NH), 4.78 (br.s., 1H, CHAr), 3.80 (s, 3H, OMe), 2.47 (br.s., 2H,  $\text{CH}_a\text{H}_b$ ), 2.26 (s, 3H, Me), 2.16 (s, 3H, Me), 1.41 (s, 9H, *t*Bu) ppm.  $^{13}\text{C}$  NMR ( $\text{CDCl}_3$ , 101 MHz): 156.6, 155.2, 135.6, 134.7, 132.6, 125.7, 123.0, 117.9, 107.7, 79.4, 55.6, 50.5, 40.6, 28.5 (3C), 15.2, 12.2. UV spectrum  $\lambda$ , nm ( $\epsilon$ ,  $\text{cm}^{-1}\text{M}^{-1}$ ): 274 (1220). Anal. Calcd. for  $\text{C}_{18}\text{H}_{27}\text{NO}_3$  (305.42): C, 70.79; H, 8.91; N, 4.59; found: C, 70.65; H, 8.99; N, 4.51.

***tert*-Butyl-(1-(4-chlorophenyl)but-3-en-1-yl)carbamate (*rac*-6j)**

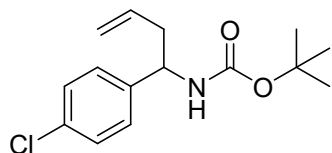

White solid,  $R_f$  0.41 (hexane/EtOAc, 8:1).  $^1\text{H}$  NMR ( $\text{CDCl}_3$ , 400 MHz):  $\delta$  7.29 (d, 2H,  $J = 8.1$  Hz, Ar), 7.19 (d, 2H,  $J = 8.3$  Hz, Ar), 5.69-5.59 (m, 1H, CH=), 5.13-5.08 (m, 2H,  $\text{CH}_2$ =), 4.85 (br.s., 1H, CHAr), 4.69 (br.s., 1H, NH), 2.47 (s, 2H,  $\text{CH}_a\text{H}_b$ ), 1.40 (s, 9H, *t*Bu) ppm. UV spectrum  $\lambda$ , nm ( $\epsilon$ ,  $\text{cm}^{-1}\text{M}^{-1}$ ): 221 (2409), 267 (84). **NMR spectrum coincides with the literature data<sup>45</sup>.**

***tert*-Butyl-(1-phenylhex-5-en-3-yl)carbamate (*rac*-6k)**

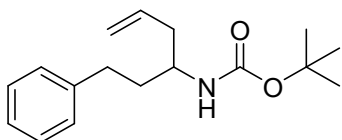

White solid,  $R_f$  0.38 (hexane/EtOAc, 8:1). Proton NMR spectrum contains signals of two rotamers 11:1. First meaning is for major rotamer.  $^1\text{H}$  NMR ( $\text{CDCl}_3$ , 400 MHz):  $\delta$  7.30-7.28 (m, 2H, Ar), 7.19-7.17 (m, 2H, Ar), 5.77 (m, 1H, CH=), 5.10-5.06 (m, 2H,  $\text{CH}_2$ =), 4.39 (d, 1H,  $J = 7.9$  Hz, CH) and 4.17 (br.s., 1H, CH), 3.72 and 3.55 (both br.s., 1H, NH), 2.74-2.59 (m, 2H,  $\text{PhCH}_2\text{CH}_2$ ), 2.32-2.18 (m, 2H,  $\text{PhCH}_2\text{CH}_2$ ), 1.85-1.76 (m, 1H,  $\text{CH}_a\text{H}_b$ ), 1.71-1.61 (m, 1H,  $\text{CH}_a\text{H}_b$ ), 1.45 (s, 9H, *t*Bu) ppm. UV spectrum  $\lambda$ , nm ( $\epsilon$ ,  $\text{cm}^{-1}\text{M}^{-1}$ ): 261 (228). **NMR spectrum coincides with the literature data<sup>42</sup>.**

***tert*-Butyl-(*E*)-(1-phenylhexa-1,5-dien-3-yl)carbamate (*rac*-6l)**

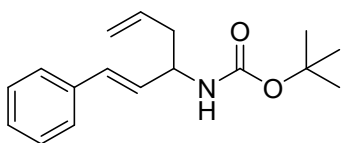

Light-beige solid,  $R_f$  0.39 (hexane/EtOAc, 8:1).  $^1\text{H}$  NMR ( $\text{CDCl}_3$ , 400 MHz):  $\delta$  7.37-7.21 (m, 5H, Ar), 6.51 (d, 1H,  $J = 15.9$  Hz, ArCH=CH), 6.13 (dd, 1H,  $J = 15.9, 5.9$  Hz, Ar-CH=CH), 5.85-5.75 (m, 1H, CH=), 5.17-5.11 (m, 2H, CH<sub>2</sub>=), 4.60 (br.s., 1H, NH), 4.38 (br.s., 1H, CH-N), 2.39 (br.s., 2H, CH<sub>a</sub>H<sub>b</sub>), 1.46 (s, 9H, *t*Bu) ppm. UV spectrum  $\lambda$ , nm ( $\epsilon$ ,  $\text{cm}^{-1}\text{M}^{-1}$ ): 252 (18960).

**NMR spectrum coincides with the literature data<sup>42</sup>.**

***tert*-Butyl-(1-(4-methoxynaphthalen-1-yl)but-3-en-1-yl)carbamate (*rac*-6m)**

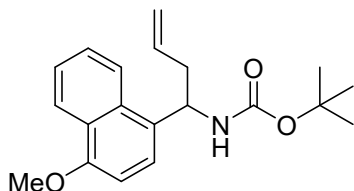

White solid,  $R_f$  0.25 (hexane/EtOAc, 8:1).  $^1\text{H}$  NMR ( $\text{CDCl}_3$ , 400 MHz):  $\delta$  8.31 (d, 1H,  $J = 8.2$  Hz, Ar), 8.07 (br.d, 1H,  $J = 7.6$  Hz, Ar), 7.50 (t, 1H,  $J = 7.0$  Hz, Ar), 7.48 (t, 1H,  $J = 7.8$  Hz, Ar), 7.33 (d, 1H,  $J = 8.0$  Hz, Ar), 6.77 (d, 1H,  $J = 7.8$  Hz, Ar), 5.81-5.71 (m, 1H, CH=), 5.48 (br.s, 1H, CHAr), 5.18-5.07 (m, 2H, CH<sub>2</sub>=), 4.89 (br.s, 1H, NH), 3.99 (s, 3H, OMe), 2.70 (br.d, 2H,  $J = 17.1$  Hz, CH<sub>a</sub>H<sub>b</sub>), 1.43 (s, 9H, *t*Bu) ppm.  $^{13}\text{C}$  NMR ( $\text{CDCl}_3$ , 101 MHz):  $\delta$  155.3, 155.1, 134.6, 132.0, 131.5, 129.7, 126.9, 126.1, 125.1, 123.0, 122.8, 117.9, 103.0, 79.5, 55.6, 49.8, 40.3, 28.5 (3C) ppm. UV spectrum  $\lambda$ , nm ( $\epsilon$ ,  $\text{cm}^{-1}\text{M}^{-1}$ ): 212 (28950), 236 (22120), 298 (5420). Anal. Calcd. for  $\text{C}_{20}\text{H}_{25}\text{NO}_3$  (327.42): C, 73.37; H, 7.70; N, 4.28; found: C, 73.20; H, 7.83; N, 4.22.

***tert*-Butyl-(1-(thiophen-2-yl)but-3-en-1-yl)carbamate (*rac*-6n)**

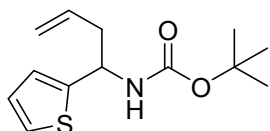

White solid,  $R_f$  0.43 (hexane/EtOAc, 8:1).  $^1\text{H}$  NMR ( $\text{CDCl}_3$ , 400 MHz):  $\delta$  7.19 (s, 1H, CH<sub>thioph</sub>), 6.94 (s, 2H, CH<sub>thioph</sub>), 5.82-5.69 (m, 1H, CH=), 5.18-5.09 (m, 2H, CH<sub>2</sub>=), 5.03 (br.s, 1H, CHAr), 4.84 (br.s, 1H, NH), 2.61 (br.s, 2H, CH<sub>a</sub>H<sub>b</sub>), 1.44 (s, 9H, *t*Bu) ppm. UV spectrum  $\lambda$ , nm ( $\epsilon$ ,  $\text{cm}^{-1}\text{M}^{-1}$ ): 234 (7350). **NMR spectrum coincides with the literature data<sup>44</sup>.**

***tert*-Butyl-(1-(4-nitrophenyl)but-3-en-1-yl)carbamate (*rac*-6o)**

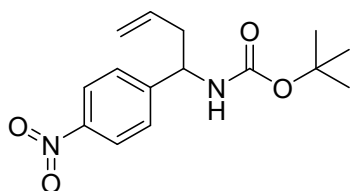

Light yellow solid,  $R_f$  0.16 (hexane/EtOAc, 8:1).  $^1\text{H}$  NMR ( $\text{CDCl}_3$ , 400 MHz):  $\delta$  8.19 (d, 2H,  $J = 8.0$  Hz, Ar), 7.43 (d, 2H,  $J = 8.1$  Hz, Ar), 5.68-5.58 (m, 1H, CH=), 5.16-5.12 (m, 2H, CH<sub>2</sub>=), 4.97 (br.s., 1H, NH), 4.79 (br.s., 1H, CHAr), 2.49 (br.s., 2H, CH<sub>a</sub>H<sub>b</sub>), 1.40 (s, 9H, *t*Bu) ppm. UV spectrum  $\lambda$ , nm ( $\epsilon$ ,  $\text{cm}^{-1}\text{M}^{-1}$ ): 274 (3510). **NMR spectrum coincides with the literature data<sup>39</sup>.**

***tert*-Butyl-(1-(4-(dimethylamino)phenyl)but-3-en-1-yl)carbamate (*rac*-6p)**

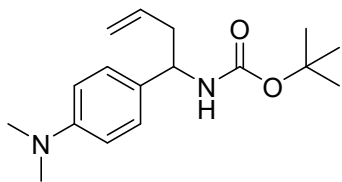

White solid, m.p. 113-114 °C (hexane),  $R_f$  0.36 (hexane/EtOAc, 4:1).  $^1\text{H}$  NMR ( $\text{CDCl}_3$ , 400 MHz):  $\delta$  7.14 (d, 2H,  $J = 8.3$  Hz, Ar), 6.71 (d, 2H,  $J = 8.4$  Hz, Ar), 5.70 (ddt,  $J = 14.1, 10.1, 7.0$  Hz, CH=), 5.11-5.03 (m, 2H,  $\text{CH}_2=$ ), 4.81 (br.s, 1H, CHAr), 4.65 (br.s, 1H, NH), 2.93 (s, 6H,  $\text{NMe}_2$ ), 2.52 (br.s, 2H,  $\text{CH}_a\text{H}_b$ ), 1.42 (s, 9H, *t*Bu) ppm.  $^{13}\text{C}$  NMR ( $\text{CDCl}_3$ , 101 MHz): 155.3, 149.8, 134.7, 130.3, 127.3 (2C), 117.7, 112.8 (2C), 79.3, 53.7, 41.2, 40.8, 28.5 (3C) ppm. UV spectrum  $\lambda$ , nm ( $\epsilon$ ,  $\text{cm}^{-1}\text{M}^{-1}$ ): 200 (25500), 259 (19750), 303 (2230). Anal. Calcd. for  $\text{C}_{17}\text{H}_{26}\text{N}_2\text{O}_2$  (290.41): C, 70.31; H, 9.02; N, 9.65; found: C, 70.22; H, 9.07; N, 9.55.

***tert*-Butyl-(1-(2-hydroxyphenyl)but-3-en-1-yl)carbamate (*rac*-6q)**

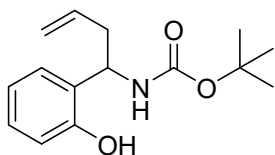

Reaction of amine with  $\text{Boc}_2\text{O}$  was carried out at r.t. The substance was purified by PTLC (hexane/EtOAc, 4:1) giving white solid.  $R_f$  0.16 (hexane/EtOAc, 8:1).  $^1\text{H}$  NMR ( $\text{CDCl}_3$ , 400 MHz):  $\delta$  8.53 (br.s, 1H, OH), 7.11-7.07 (m, 2H, Ar), 6.85-6.81 (m, 2H, Ar), 5.73 (ddt, 1H,  $J = 13.9, 10.1, 6.9$  Hz, CH=), 5.40-5.06 (m, 3H,  $\text{CH}_2=$  and CHAr), 4.89 (br.s, 1H, NH), 2.62-2.59 (m, 2H,  $\text{CH}_a\text{H}_b$ ), 1.46 (s, 9H, *t*Bu) ppm.  $^{13}\text{C}$  NMR ( $\text{CDCl}_3$ , 101 MHz):  $\delta$  157.2, 154.8, 134.7, 128.7, 128.0, 126.6, 120.0, 117.9, 117.1, 80.8, 49.0, 38.7, 28.5 (3C) ppm. UV spectrum  $\lambda$ , nm ( $\epsilon$ ,  $\text{cm}^{-1}\text{M}^{-1}$ ): 273 (3180), 331 (260). **NMR spectra coincide with the literature data<sup>46</sup>.**

***tert*-Butyl-(1-(pyridin-4-yl)but-3-en-1-yl)carbamate (*rac*-6r)**

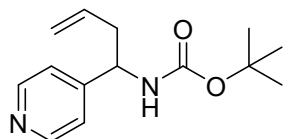

Reaction of amine with  $\text{Boc}_2\text{O}$  was carried out at r.t. After protection of amine group, the reaction mixture was dissolved in hexane/EtOAc = 1:1, extracted with saturated  $\text{K}_2\text{CO}_3$  solution, dried with  $\text{K}_2\text{CO}_3$  and evaporated. The residue was purified by flash chromatography that gave brown oil,  $R_f$  0.31 (hexane/EtOAc, 1:1).  $^1\text{H}$  NMR ( $\text{CDCl}_3$ , 400 MHz):  $\delta$  8.54 (br.s, 2H, Ar), 7.21 (d, 2H,  $J = 4.6$  Hz, Ar), 5.66-5.56 (m, 1H, CH=), 5.17 (d, 1H,  $J = 6.8$  Hz, NH), 5.12-5.08 (m, 2H,  $\text{CH}_2=$ ), 4.71 (br.s, 1H, CH), 2.46 (br.s, 2H,  $\text{CH}_a\text{H}_b$ ), 1.39 (s, 9H, *t*Bu) ppm.  $^{13}\text{C}$  NMR ( $\text{CDCl}_3$ , 101 MHz): 155.2, 152.5, 149.3 (2C), 132.8, 121.6 (2C), 119.3, 80.1, 53.3, 40.5, 28.4

(3C) ppm. UV spectrum  $\lambda$ , nm ( $\epsilon$ ,  $\text{cm}^{-1}\text{M}^{-1}$ ): 255 (1710). Anal. Calcd. for  $\text{C}_{14}\text{H}_{20}\text{N}_2\text{O}_2$  (248.33): C, 67.72; H, 8.12; N, 11.28; found: C, 67.55; H, 8.34; N, 11.20.

***tert*-Butyl-(1-(pyridin-3-yl)but-3-en-1-yl)carbamate (*rac*-6s)**

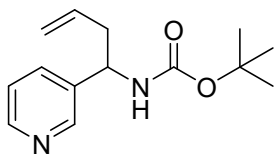

Reaction of amine with  $\text{Boc}_2\text{O}$  was carried out at r.t. After protection of amine group, the reaction mixture was dissolved in hexane/EtOAc = 1:1, washed with saturated  $\text{K}_2\text{CO}_3$  solution, organic extracts were dried with  $\text{K}_2\text{CO}_3$  and evaporated. The residue was purified by flash chromatography that gave beige solid,  $R_f$  0.44 (hexane/EtOAc, 1:1).  $^1\text{H}$  NMR ( $\text{CDCl}_3$ , 400 MHz):  $\delta$  8.49 (d, 2H,  $J = 29.8$  Hz, Ar), 7.58 (d, 1H,  $J = 7.8$  Hz, Ar), 7.24-7.21 (m, 1H, Ar), 5.66-5.56 (m, 1H, CH=), 5.34 (br.s., 1H, CHAr), 5.07-5.03 (m, 2H,  $\text{CH}_2=$ ), 4.71 (br.s., 1H, NH), 2.46 (br.s., 2H,  $\text{CH}_a\text{H}_b$ ), 1.34 (s, 9H, *t*Bu) ppm.  $^{13}\text{C}$  NMR ( $\text{CDCl}_3$ , 101 MHz): 155.2, 147.8, 147.6, 138.5, 134.7, 133.1, 123.6, 119.0, 79.8, 52.1, 40.8, 28.3 (3C) ppm. UV spectrum  $\lambda$ , nm ( $\epsilon$ ,  $\text{cm}^{-1}\text{M}^{-1}$ ): 261 (2220). Anal. Calcd. for  $\text{C}_{14}\text{H}_{20}\text{N}_2\text{O}_2$  (248.33): C, 67.72; H, 8.12; N, 11.28; found: C, 67.69; H, 8.15; N, 11.20.

***tert*-Butyl-(1-(pyridin-2-yl)but-3-en-1-yl)carbamate (*rac*-6t)**

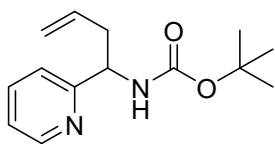

Reaction of amine with  $\text{Boc}_2\text{O}$  was carried out at r.t. White solid,  $R_f$  0.22 (hexane/EtOAc, 4:1). Proton NMR spectrum contained signals of two rotamers 6:1. First meaning is for major rotamer.  $^1\text{H}$  NMR ( $\text{CDCl}_3$ , 400 MHz):  $\delta$  8.48 (d, 1H,  $J = 4.7$  Hz, Ar), 7.56 (td, 1H,  $J = 7.6, 1.2$  Hz, Ar), 7.15 (d, 1H,  $J = 7.8$  Hz, Ar), 7.11-7.08 (m, 1H, Ar), 5.73 (br.d, 1H,  $J = 6.8$  Hz, NH) and 5.33 (br.s, 1H, NH), 5.66-5.55 (m, 1H, CH=), 4.98-4.77 (m, 2H,  $\text{CH}_2=$ ), 4.76 (q, 1H,  $J = 6.9$  Hz, CH) and 4.62 (br.s, 1H, CH), 2.53 (t, 2H,  $J = 6.6$  Hz,  $\text{CH}_a\text{H}_b$ ), 1.36 and 1.31 (both s, 9H, *t*Bu) ppm.  $^{13}\text{C}$  NMR spectrum contains signals of rotamers.  $^{13}\text{C}$  NMR ( $\text{CDCl}_3$ , 101 MHz):  $\delta$  160.1, 155.4, 149.13 and 149.09, 136.5 and 136.4, 133.8, 122.20, 121.9, 118.2 and 118.0 and 117.8, 79.2, 55.0 and 54.9, 40.9 and 40.8 and 40.7, 28.4 (3C) ppm. UV spectrum  $\lambda$ , nm ( $\epsilon$ ,  $\text{cm}^{-1}\text{M}^{-1}$ ): 260 (2970).

**NMR spectra coincide with the literature data<sup>47</sup>.**

***tert*-Butyl-(1-(3-methylpyridin-2-yl)but-3-en-1-yl)carbamate (*rac*-6u)**

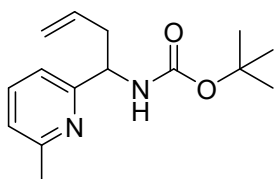

Reaction of amine with  $\text{Boc}_2\text{O}$  was carried out at r.t. White solid,  $R_f$  0.44 (hexane/EtOAc, 4:1). Proton NMR spectrum contained signals of two rotamers 5:1. First meaning is for major rotamer.  $^1\text{H}$  NMR ( $\text{CDCl}_3$ , 400 MHz):  $\delta$  7.50 (t, 1H,  $J = 7.7$  Hz, Ar), 6.99 (t, 2H,  $J = 8.0$  Hz, Ar), 5.77 and 5.34 (both br.s, 1H, NH), 5.65 (ddt, 1H,  $J = 17.3, 10.2, 7.1$  Hz,  $\text{CH}=\text{}$ ), 5.03-4.99 (m, 2H,  $\text{CH}_2=\text{}$ ), 4.75 (q, 1H,  $J = 7.1$  Hz, CH) and 4.63 (br.s, 1H, CH), 2.57 (t, 2H,  $J = 6.8$  Hz,  $\text{CH}_a\text{H}_b$ ), 2.53 (s, 3H, Me), 1.43 and 1.37 (both br.s, 9H, *t*Bu) ppm.  $^{13}\text{C}$  NMR ( $\text{CDCl}_3$ , 101 MHz): 159.19, 157.96, 155.45, 136.86, 134.16, 121.92, 118.84, 117.95, 79.29, 54.98, 41.09, 28.51 (3C), 24.40 ppm. UV spectrum  $\lambda$ , nm ( $\epsilon$ ,  $\text{cm}^{-1}\text{M}^{-1}$ ): 264 (4000). Anal. Calcd. for  $\text{C}_{15}\text{H}_{22}\text{N}_2\text{O}_2$  (262.35): C, 68.67; H, 8.45; N, 10.68; found: C, 68.60; H, 8.53; N, 10.62.

***tert*-Butyl-(1-(1-ethyl-1H-pyrazol-4-yl)but-3-en-1-yl)carbamate (*rac*-6v)**

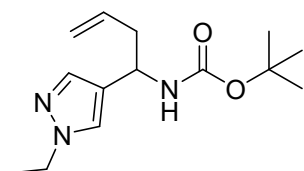

Pale yellow oil,  $R_f$  0.23 (hexane/EtOAc, 2:1).  $^1\text{H}$  NMR ( $\text{CDCl}_3$ , 400 MHz):  $\delta$  7.40 (s, 1H, Ar), 7.30 (s, 1H, Ar), 5.78-5.68 (m, 1H,  $\text{CH}=\text{}$ ), 5.12-5.06 (m, 2H,  $\text{CH}_2=\text{}$ ), 4.74 (br.s., 2H, CH and NH), 4.12 (q, 2H,  $J = 7.3$  Hz,  $\text{CH}_2\text{-CH}_3$ ), 2.50 (br.s., 2H,  $\text{CH}_a\text{H}_b$ ), 1.45 (t, 3H,  $J = 7.3$  Hz,  $\text{CH}_2\text{-CH}_3$ ), 1.41 (s, 9H, *t*Bu) ppm. UV spectrum  $\lambda$ , nm ( $\epsilon$ ,  $\text{cm}^{-1}\text{M}^{-1}$ ): 340 (86). **NMR spectrum coincides with the literature data<sup>5</sup>.**

***tert*-Butyl-(1-(1-phenyl-1H-pyrazol-4-yl)but-3-en-1-yl)carbamate (*rac*-6w)**

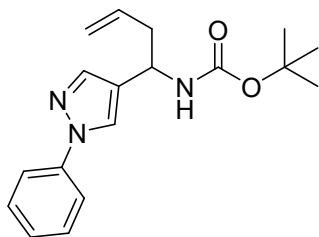

White solid,  $R_f$  0.28 (hexane/EtOAc, 4:1).  $^1\text{H}$  NMR ( $\text{CDCl}_3$ , 400 MHz):  $\delta$  7.83 (s, 1H,  $\text{CH}_{\text{pyr}}$ ), 7.66 (s, 1H,  $\text{CH}_{\text{pyr}}$ ), 7.63 (s, 2H, Ph), 7.43 (t, 2H,  $J = 7.8$  Hz, Ph), 7.27 (t, 1H,  $J = 7.4$  Hz, Ph), 5.79 (ddt, 1H,  $J = 17.1, 10.1, 7.0$  Hz,  $\text{CH}=\text{}$ ), 5.18-5.11 (m, 2H,  $\text{CH}_2=\text{}$ ), 4.82 (br.s, 2H, CHN and NH), 2.64-2.52 (m, 2H,  $\text{CH}_a\text{H}_b$ ), 1.45 (s, 9H, *t*Bu) ppm. UV spectrum  $\lambda$ , nm ( $\epsilon$ ,  $\text{cm}^{-1}\text{M}^{-1}$ ): 261 (10890). **NMR spectrum coincides with the literature data<sup>5</sup>.**



## Quantum-Chemical Calculations

To account for nucleophilicity of the amine after dissociation, we have computed reaction energies (total and Gibbs free ones) for the following reaction for complexes **1a-f**:

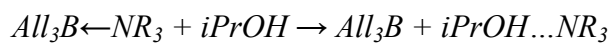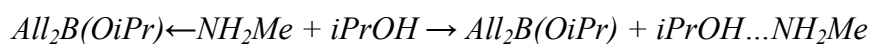

Starting geometries were constructed by hand starting from the lowest-energy conformer of  $All_3B$  (Figure S1).

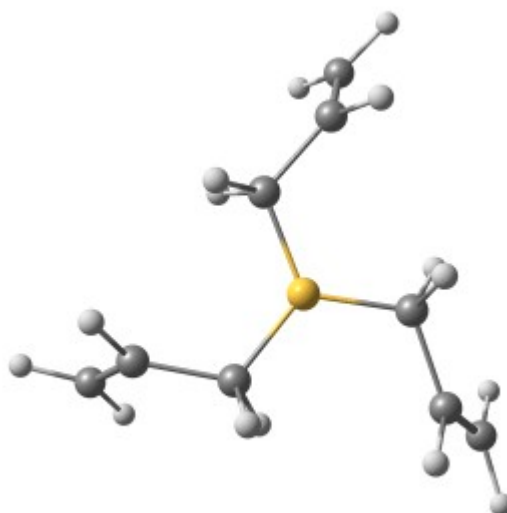

Figure S1. Lowest-energy conformer of Al<sub>3</sub>B.

The constructed structures were optimized at PBE0<sup>48</sup>-D4<sup>49</sup>/def2SVP<sup>50</sup>/CPCM<sup>51</sup>(*i*PrOH) level of theory in Orca<sup>52</sup> 5.0.4 program package. Harmonic frequencies were computed for all structures to ensure that they correspond to local minima and estimate their Gibbs free energies at 298 °K using quasiharmonic correction<sup>53</sup>. The considered molecules and their energies are provided in Table S3; their geometries are available in StatPoints.xyz file in SI.

**Table S4.** Total and Gibbs free energies of all the computed molecules.

| <b>Molecule</b>                                      | <b>Total energy, Ha</b> | <b>Quasi-harmonic Gibbs free energy, Ha</b> |
|------------------------------------------------------|-------------------------|---------------------------------------------|
| All <sub>3</sub> B                                   | -376.059                | -375.883                                    |
| All <sub>2</sub> B(O <i>i</i> Pr)                    | -452.434                | -452.229                                    |
| <i>i</i> PrOH_NH <sub>3</sub>                        | -250.463                | -250.350                                    |
| <i>i</i> PrOH_NHMe <sub>2</sub>                      | -328.921                | -328.754                                    |
| <i>i</i> PrOH_NH <sub>2</sub> Me                     | -289.690                | -289.549                                    |
| <i>i</i> PrOH_DABCO                                  | -538.721                | -538.465                                    |
| All <sub>3</sub> B*NH <sub>3</sub>                   | -432.557                | -432.339                                    |
| All <sub>3</sub> B*NHMe <sub>2</sub>                 | -511.012                | -510.739                                    |
| All <sub>3</sub> B*NH <sub>2</sub> Me                | -471.785                | -471.540                                    |
| All <sub>2</sub> B(O <i>i</i> Pr)*NH <sub>2</sub> Me | -548.143                | -547.872                                    |
| All <sub>3</sub> B*DABCO                             | -720.807                | -720.446                                    |
| <i>i</i> PrOH                                        | -193.997                | -193.917                                    |

## X-ray crystallography general view

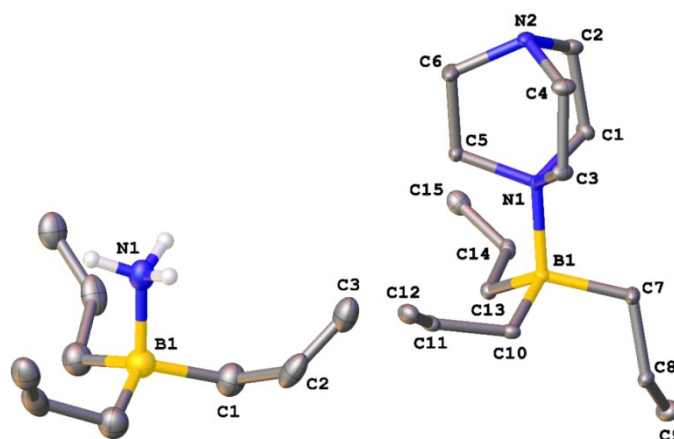

Figure S2. General view of **1b** (left) and **1d** (right). Hydrogen atoms except those of the NH<sub>3</sub> groups in **1b** are omitted, other atoms are shown as thermal ellipsoids at 20% probability level. Hydrogen atoms except those of the NH<sub>3</sub> groups in **1b** are omitted. Minor components of the disordered allyl groups in **1d** are not shown.

**Table S5.** Selected bond length in triallylborane of ammonia **1b** and DABCO **1d** adducts

| Compound           | B-N, Å    | B-C <sup>sp<sup>3</sup></sup> <sub>allyl</sub> , Å | C <sup>sp<sup>3</sup></sup> <sub>allyl</sub> -C <sup>sp<sup>2</sup></sup> , Å | C <sup>sp<sup>2</sup></sup> <sub>allyl</sub> -C <sup>sp<sup>2</sup></sup> <sub>allyl</sub> , Å |
|--------------------|-----------|----------------------------------------------------|-------------------------------------------------------------------------------|------------------------------------------------------------------------------------------------|
| TABA <b>1b</b>     | 1.638(15) | 1.636(8)                                           | 1.521(10)                                                                     | 1.308(10)                                                                                      |
| TABDABCO <b>1d</b> | 1.691(3)  | 1.627(3)                                           | 1.495(3)                                                                      | 1.310(3)                                                                                       |

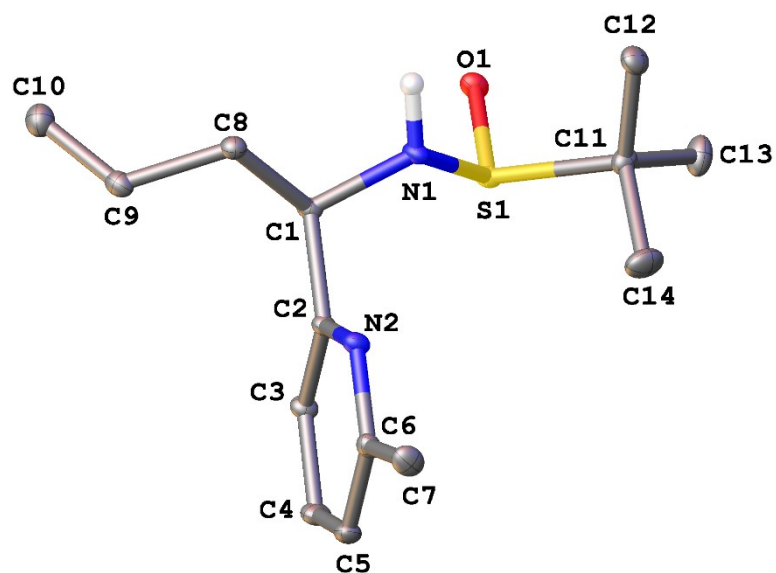

Figure S3. General view of minor isomer **3u**. Hydrogen atoms except those of the NH group are omitted, other atoms are shown as thermal ellipsoids at 30% probability level. Selected bond lengths (Å): N1-C11.488(2), C1-C21.519(3), C1-C81.532(3), C8-C91.496(3), C9-C101.316(3), N1-S11.6657(16), S1-O1 1.5004(13), S1-C111.844(2).

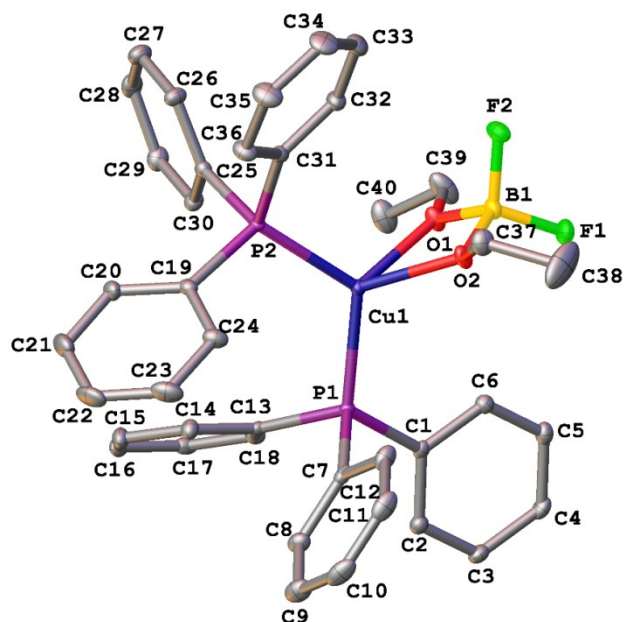

Figure S4. General view of **[Cu-2]**. Hydrogen atoms are omitted, other atoms are shown as thermal ellipsoids at 30% probability level. Selected bond lengths (Å): Cu(1)-O(1) 2.1108(16), Cu(1)-O(2) 2.1735(17), Cu(1)-P(1) 2.2279(7), Cu(1)-P(2) 2.2336(7).

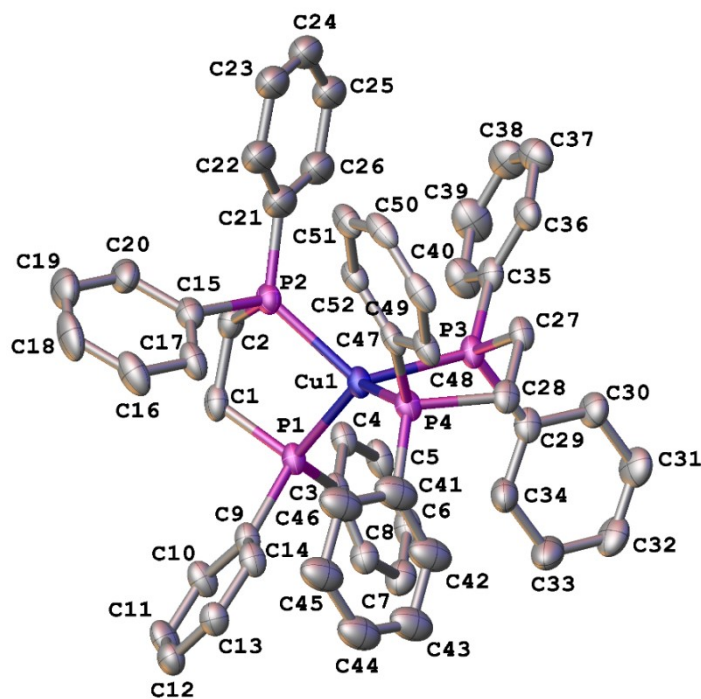

Figure S5. General view of [Cu-5]. Tetrafluoroborate anions and hydrogen atoms are omitted, other atoms are shown as thermal ellipsoids at 30% probability level. Selected bond lengths (Å): Cu(1)-P(1) 2.2914(17), Cu(1)-P(2) 2.2585(2), Cu(1)-P(3) 2.2869(18), Cu(1)-P(4) 2.2855(19).

### X-Ray crystallography experimental section

X-ray diffraction data for **1b** were collected at 100 K on the ‘Belok/RSA’ beamline ( $\lambda = 0.96990$  Å) of the Kurchatov Synchrotron Radiation Source using a Rayonix SX165 detector. In total, 720 frames were collected with an oscillation range of  $1.0^\circ$  in the  $\varphi$ -scanning mode using two different orientations for the crystal. The semi-empirical correction for absorption was applied using the *Scala* program<sup>54</sup>. The data were indexed and integrated using the utility *iMOSFLM* from the CCP4 software suite. The data for [Cu-2] and [Cu-5] were collected at 100 K on a four-circle Rigaku Synergy S diffractometer equipped with a HyPix6000HE area-detector (CuK $\alpha$ -radiation, graphite monochromator, shutterless  $\varphi$ - and  $\omega$ -scanning mode) and integrated and corrected for absorption by the *CrysAlisPro* program<sup>55</sup>. The data for **1d** and **3u** were collected at 100 K with a Bruker Quest D8 CMOS diffractometer using graphite monochromated Mo-K $\alpha$  radiation ( $\lambda = 0.71073$  Å,  $\omega$ -scans). All structures were solved using intrinsic phasing with the ShelXT<sup>56</sup> structure solution program and refined by a full-matrix least-squares technique on  $F^2$

with anisotropic displacement parameters for all non-hydrogen atoms. In the case of **[Cu-5]**, all attempts to model and refine positions of solvate molecules were unsuccessful; therefore, their contribution to the total scattering was removed by using *SQUEEZE* option in PLATON15<sup>57</sup>. The hydrogen atoms of the NH<sub>3</sub>-group in **1b** were located in the difference-Fourier maps and included in the refinement with fixed positional and isotropic displacement parameters [ $U_{\text{iso}}(\text{H}) = 1.5U_{\text{eq}}(\text{N})$ ]. The other hydrogen atoms were placed in calculated positions and refined within riding model with fixed isotropic displacement parameters [ $U_{\text{iso}}(\text{H}) = 1.2U_{\text{eq}}(\text{C})$  for the other groups]. Crystal data and structure refinement parameters are given in **Tables S6**. Calculations for **1b**, **1d** and **3u** were carried out using the Olex2 program<sup>58</sup>, those for **[Cu-2]** and **[Cu-5]**, using the SHELXTL program<sup>54</sup>. Crystallographic data have been deposited with the Cambridge Crystallographic Data Center, **CCDC 2288950 (1b)**, **CCDC 2288951 (1d)**, **CCDC 2288952 (3u)**, **CCDC 2298366 ([Cu-2])**, and **CCDC 2298367 ([Cu-5])**. Copies of this information may be obtained free of charge from the Director, CCDC, 12 Union Road, Cambridge CB2 1EZ, UK (fax: +44 1223 336033; e-mail: [deposit@ccdc.cam.ac.uk](mailto:deposit@ccdc.cam.ac.uk) or [www.ccdc.cam.ac.uk](http://www.ccdc.cam.ac.uk)).

**Table S6.** Crystal data and structure refinement parameters for **1b**, **1d**, **3u**, **[Cu-2]**, **[Cu-5]**.

|                   | <b>1b</b>                         | <b>1d</b>                                       | <b>3u</b>                                         | <b>[Cu-2]</b>                                                                   | <b>[Cu-5]</b>                                                    |
|-------------------|-----------------------------------|-------------------------------------------------|---------------------------------------------------|---------------------------------------------------------------------------------|------------------------------------------------------------------|
| Empirical formula | C <sub>9</sub> H <sub>18</sub> BN | C <sub>15</sub> H <sub>27</sub> BN <sub>2</sub> | C <sub>14</sub> H <sub>22</sub> N <sub>2</sub> OS | C <sub>40</sub> H <sub>40</sub> BCuF <sub>2</sub> O <sub>2</sub> P <sub>2</sub> | C <sub>52</sub> H <sub>48</sub> BCuF <sub>4</sub> P <sub>4</sub> |
| Formula weight    | 151.05                            | 246.19                                          | 266.39                                            | 727.02                                                                          | 947.14                                                           |
| T, °K             | 100                               | 100                                             | 100                                               | 100                                                                             | 100                                                              |
| Crystal system    | Trigonal                          | Orthorhombic                                    | Monoclinic                                        | Orthorhombic                                                                    | Monoclinic                                                       |
| Space group       | R3                                | P2 <sub>1</sub> 2 <sub>1</sub> 2 <sub>1</sub>   | P2 <sub>1</sub>                                   | Pca2 <sub>1</sub>                                                               | P2 <sub>1</sub> /n                                               |
| Z                 | 3                                 | 4                                               | 2                                                 | 4                                                                               | 4                                                                |
| a, Å              | 10.5689(15)                       | 8.6952(2)                                       | 10.7916(4)                                        | 22.02359(16)                                                                    | 14.0344(3)                                                       |
| b, Å              | 10.5689(15)                       | 10.1193(2)                                      | 6.2242(2)                                         | 9.06591(6)                                                                      | 18.8088(3)                                                       |
| c, Å              | 8.3975(17)                        | 17.1397(4)                                      | 11.7768(4)                                        | 18.14329(10)                                                                    | 18.9839(4)                                                       |
| α, °              | 90                                | 90                                              | 90                                                | 90                                                                              | 90                                                               |
| β, °              | 90                                | 90                                              | 108.897(2)                                        | 90                                                                              | 90.5447(19)                                                      |
| γ, °              | 120                               | 90                                              | 90                                                | 90                                                                              | 90                                                               |
| V, Å <sup>3</sup> | 812.3(3)                          | 1508.11(6)                                      | 748.40(5)                                         | 3622.56(4)                                                                      | 5010.96(17)                                                      |

|                                                                        |              |              |              |              |              |
|------------------------------------------------------------------------|--------------|--------------|--------------|--------------|--------------|
| $D_{\text{calc}}$ (g cm <sup>-1</sup> )                                | 0.926        | 1.084        | 1.182        | 1.333        | 1.255        |
| Linear absorption, $\mu$ (cm <sup>-1</sup> )                           | 1.11         | 0.62         | 2.08         | 2.043        | 2.214        |
| F(000)                                                                 | 252          | 544          | 288          | 1512         | 1960         |
| $2\theta_{\text{max}}$ , °                                             | 70           | 58           | 58           | 79.884       | 79.673       |
| Reflections measured                                                   | 2089         | 20204        | 9895         | 30742        | 47124        |
| Independent reflections                                                | 596          | 4000         | 3943         | 5494         | 10502        |
| Observed reflections [ $I > 2\sigma(I)$ ]                              | 416          | 3582         | 3721         | 5437         | 7727         |
| Parameters                                                             | 35           | 180          | 167          | 435          | 475          |
| R1                                                                     | 0.0750       | 0.0485       | 0.0316       | 0.0275       | 0.1164       |
| wR2                                                                    | 0.1792       | 0.1240       | 0.0767       | 0.0741       | 0.2470       |
| GOF                                                                    | 0.941        | 1.045        | 1.039        | 1.032        | 1.031        |
| $\Delta\rho_{\text{max}}/\Delta\rho_{\text{min}}$ (e Å <sup>-3</sup> ) | 0.151/-0.291 | 0.208/-0.183 | 0.288/-0.195 | 0.300/-0.424 | 1.746/-0.817 |

## References:

- A. M. Borys. *Organometallics*, **2023**, *42*, 182–196.
- L. I. Zakharkin, V. I. Stanko. *Bulletin of the Academy of Sciences of the USSR, Division of Chemical Science*, **1960**, *9*, 1774–1776.
- N. Yu. Kuznetsov, R. M. Tikhov, T. V. Strelkova, Yu. N. Bubnov. *Org. Lett.*, **2018**, *20*, 3549–3552.
- N. Yu. Kuznetsov, R. M. Tikhov, T. V. Strelkova, Yu. N. Bubnov. *Org. Biomol. Chem.*, **2018**, *16*, 7115–7119.
- N. Yu. Kuznetsov, V. N. Khrustalev, T. V. Strelkova, Yu. N. Bubnov. *Tetrahedron: Asymmetry*, **2014**, *25*, 667–676.
- N. Yu. Kuznetsov, R. M. Tikhov, T. V. Strelkova, Yu. N. Bubnov. *Org. Lett.*, **2018**, *20*, 3549–3552.
- R. N. Keller, H. D. Wycoff. *Inorg. Synth.*, **1946**, *2*, 1–3.
- C. M. Wheeler Jr., H. M. Haendler. *J. Am. Chem. Soc.*, **1954**, *76*, 263–264.
- A. J. Arduengo, R. Krafczyk, R. Schmutzler, H. A. Craig, J. R. Goerlich, W. J. Marshall, M. Unverzagt. *Tetrahedron*, **1999**, *55*, 14523–14534.
- H. Eriksson, M. Håkansson. *Organometallics*, **1997**, *16*, 4243–4244.
- J. H. Siitonen, P. V. Kattamuri, M. Yousufuddin, L. Kürti. *Org. Lett.*, **2020**, *22*, 2486–2489.
- D. J. Gulliver, W. Levason, M. Webster. *Inorganica Chimica Acta*, **1981**, *52*, 153–159.
- S. Diez-Gonzalez, H. Kaur, F. K. Zinn, E. D. Stevens, S. P. Nolan. *Journal of Organic Chemistry*, **2005**, *70*, 4784–4796.
- P. Comba, C. Katsichtis, B. Nuber, H. Pritzkow. *Eur. J. Inorg. Chem.*, **1999**, *5*, 777–783.
- T. Kräuter, B. Neumüller. *Polyhedron*, **1996**, *15*, 2851–2857.
- J. Diez, M. P. Gamasa, J. Gimeno, A. Aguirre, S. Garcí'a-Granda. *Organometallics*, **1999**, *18*, 662–669.
- K. M. van Vliet, L. H. Polak, M. A. Siegler, J. I. van der Vlugt, C. F. Guerra, B. de Bruin. *J. Am. Chem. Soc.*, **2019**, *141*, 38, 15240–15249.
- C. M. McBride, B. Levine, Y. Xia *et al.* *Journal of Medicinal Chemistry*, **2014**, *57*, 9124–9129.
- J. F. Collados, E. Toledano, D. Guijarro, M. Yus. *J. Org. Chem.*, **2012**, *77*, 5744–5750.
- A. Llobat, J. Escorihuela, S. Fustero, M. Medio-Simón. *Org. Lett.*, **2021**, *23*, 3691–3695.
- S. Fustero, I. Ibáñez, P. Barrio, M. A. Maestro, S. Catalán. *Organic Letters*, **2013**, *15*, 832–835.
- P. Nagarajan, C. Rajendiran, A. Naidu, P. K. Dubey. *Asian Journal of Chemistry*, **2013**, *25*, 9345–9350.
- J. A. Sirvent, F. Foubelo, M. Yus. *Eur. J. Org. Chem.*, **2013**, *12*, 2461–2471.
- C. Verrier, S. Carret, J.-F. Poisson. *ACS Sustainable Chem. Eng.*, **2018**, *6*, 8563–8569.
- M. Elsherbini, T. Wirth. *Tetrahedron*, **2018**, *74*, 3101–3106.
- E. R. Kiemele, M. Wathier, P. Bichler, J. A. Love. *Organic Letters*, **2016**, *18*, 492–495.
- J. T. Reeves, M. D. Visco, M. A. Marsini, N. Grinberg, C. A. Busacca, A. E. Mattson, C. H. Senanayake. *Organic Letters*, **2015**, *17*, 2442–2445.
- D. R. Fandrick, C. S. Johnson, K. R. Fandrick, J. T. Reeves, Z. Tan, H. Lee, J. Song, N. K. Yee, C. H. Senanayake. *Organic Letters*, **2010**, *12*, 748–751.
- S. Srinath, S. Ramu, S. Elavarasan, D. Paradesi, R. M. Kumar, K. Ilango, B. Baskar. *Molecular Catalysis*, **2017**, *443*, 294–300.
- K. Sun, B.-H. Yuan, Y. Hu, X.-W. Sun, G.-Q. Lin. *J. Saudi Chem. Soc.*, **2018**, *22*, 654–664.
- J. M. Axten, N. E. Faucher, A. C.-M. Daugan, R. R. Kethiri, R. Kristam, C. Venkateshappa. *WO2017/046737 A1*, Great Britain, 23.03.2017.
- M. T. Robak, M. A. Herbage, J. A. Synthesis and Applications of *tert*-Butanesulfonamide. *Ellman, Chem. Rev.* **2010**, *110*, 3600–3740.
- X.-W. Sun, M.-H. Xu, G.-Q. Lin. *Org. Lett.*, **2006**, *8*, 4979–4982.

- 
- <sup>34</sup>X.-Y. Chen, L.-S. Sun, X. Gao, X.-W. Sun. *J. Chem. Educ.* **2015**, *92*, 714–718.
- <sup>35</sup>Y.-S. Zhao, Q. Liu, P. Tian, J.-C. Tao, G.-Q. Lin. *Org. Biomol. Chem.*, **2015**, *13*, 4174–4178.
- <sup>36</sup>J. C. González-Gómez, M. Medjahdi, F. Foubelo, M. Yus. *J. Org. Chem.* **2010**, *75*, 6308–6311.
- <sup>37</sup>M. Das, D. F. O’Shea. *Chem. Eur. J.*, **2015**, *21*, 18717–18723.
- <sup>38</sup>X.-W. Sun, M. Liu, M.-H. Xu, G.-Q. Lin. *Org. Lett.*, **2008**, *10*, 1259–1262.
- <sup>39</sup>H. B. Hepburn, N. Chotsaeng, Y. Luo, H. W. Lam, *Synthesis*, **2013**, *45*, 2649–2661
- <sup>40</sup>S. Laschat, H. Kunz. *J. Org. Chem.*, **1991**, *56*, 5883–5889.
- <sup>41</sup>D. Ghosh, S. Saravanan, N. Gupta, S. H. R. Abdi, N.-u. H. Khan, R. I. Kureshy, H. C. Bajaj. *Asian J. Org. Chem.*, **2014**, *3*, 1173–1181.
- <sup>42</sup>T. Vilaivan, C. Winotapan, V. Banphavichit, T. Shinada, Y. Ohfuné. *J. Org. Chem.*, **2005**, *70*, 3464–3471.
- <sup>43</sup>P.-O. Delaye, M. Ahari, J.-L. Vasse, J. Szymoniak. *Tetrahedron: Asymmetry*, **2010**, *21*, 2505–2511.
- <sup>44</sup>Y. Gong, Z.-Y. Cao, Y.-B. Shi, F. Zhou, Y. Zhou, J. Zhou. *Org. Chem. Front.*, **2019**, *6*, 3989–3995.
- <sup>45</sup>L. Wei, Q. Zhu, L. Xiao H.-Y. Tao, C.-J. Wang. *Nature Communications*, **2019**, *10*, 1594.
- <sup>46</sup>H. B. Hepburn, N. Chotsaeng, Y. Luo, H. W. Lam. *Synthesis*, **2013**; *45*, 2649–2661.
- <sup>47</sup>T. Vilaivan, C. Winotapan, V. Banphavichit, T. Shinada, Y. Ohfuné. *J. Org. Chem.*, **2005**, *70*, 3464–3471.
- <sup>48</sup>C. Adamo, V. Barone. *J. Chem. Phys.*, **1999**, *110*, 6158–6170.
- <sup>49</sup>E. Caldeweyher, C. Bannwarth, S. Grimme. *J. Chem. Phys.*, **2017**, *147*, 034112.
- <sup>50</sup>F. Weigend, R. Ahlrichs. *Phys. Chem. Chem. Phys.*, **2005**, *7*, 3297–3305.
- <sup>51</sup>B. Mennucci. *Wiley Interdiscip. Rev. Comput. Mol. Sci.*, **2012**, *2*, 386–404.
- <sup>52</sup>F. Neese, F. Wennmohs, U. Becker, C. Riplinger. *J. Chem. Phys.*, **2020**, *152*, 224108.
- <sup>53</sup>(a) S. Grimme. *Chem. – Eur. J.*, **2012**, *18*, 9955–9964; (b) Y.-P. Li, J. Gomes, S. Mallikarjun Sharada, A. T. Bell, M. Head-Gordon. *J. Phys. Chem. C*, **2015**, *119*, 1840–1850.
- <sup>54</sup>P. Evans, *Acta Crystallogr.* **2006**, *D62*, 72–82.
- <sup>55</sup>T. G. G. Battye, L. Kontogiannis, O. Johnson, H. R. Powell, A. G. W. Leslie. *Acta Crystallogr.*, **2011**, *D67*, 271–281.
- <sup>56</sup>G. M. Sheldrick. *Acta Cryst.*, **2015**, *A71*, 3–8.
- <sup>57</sup>A. L. Spek. *PLATON*, A Multipurpose Crystallographic Tool, Utrecht University, the Netherlands, **2015**.
- <sup>58</sup>O. V. Dolomanov, L. J. Bourhis, R. J. Gildea, J. A. K. Howard, H. Puschmann. *J. Appl. Cryst.*, **2009**, *42*, 339–341.



Diallyl(isopropoxy)borane **4**.  $^{11}\text{B}$  NMR (128 MHz) as ethereal solution, purity 94%. Admixture of allyl(diisopropoxy)borane **5** (6%).

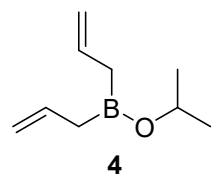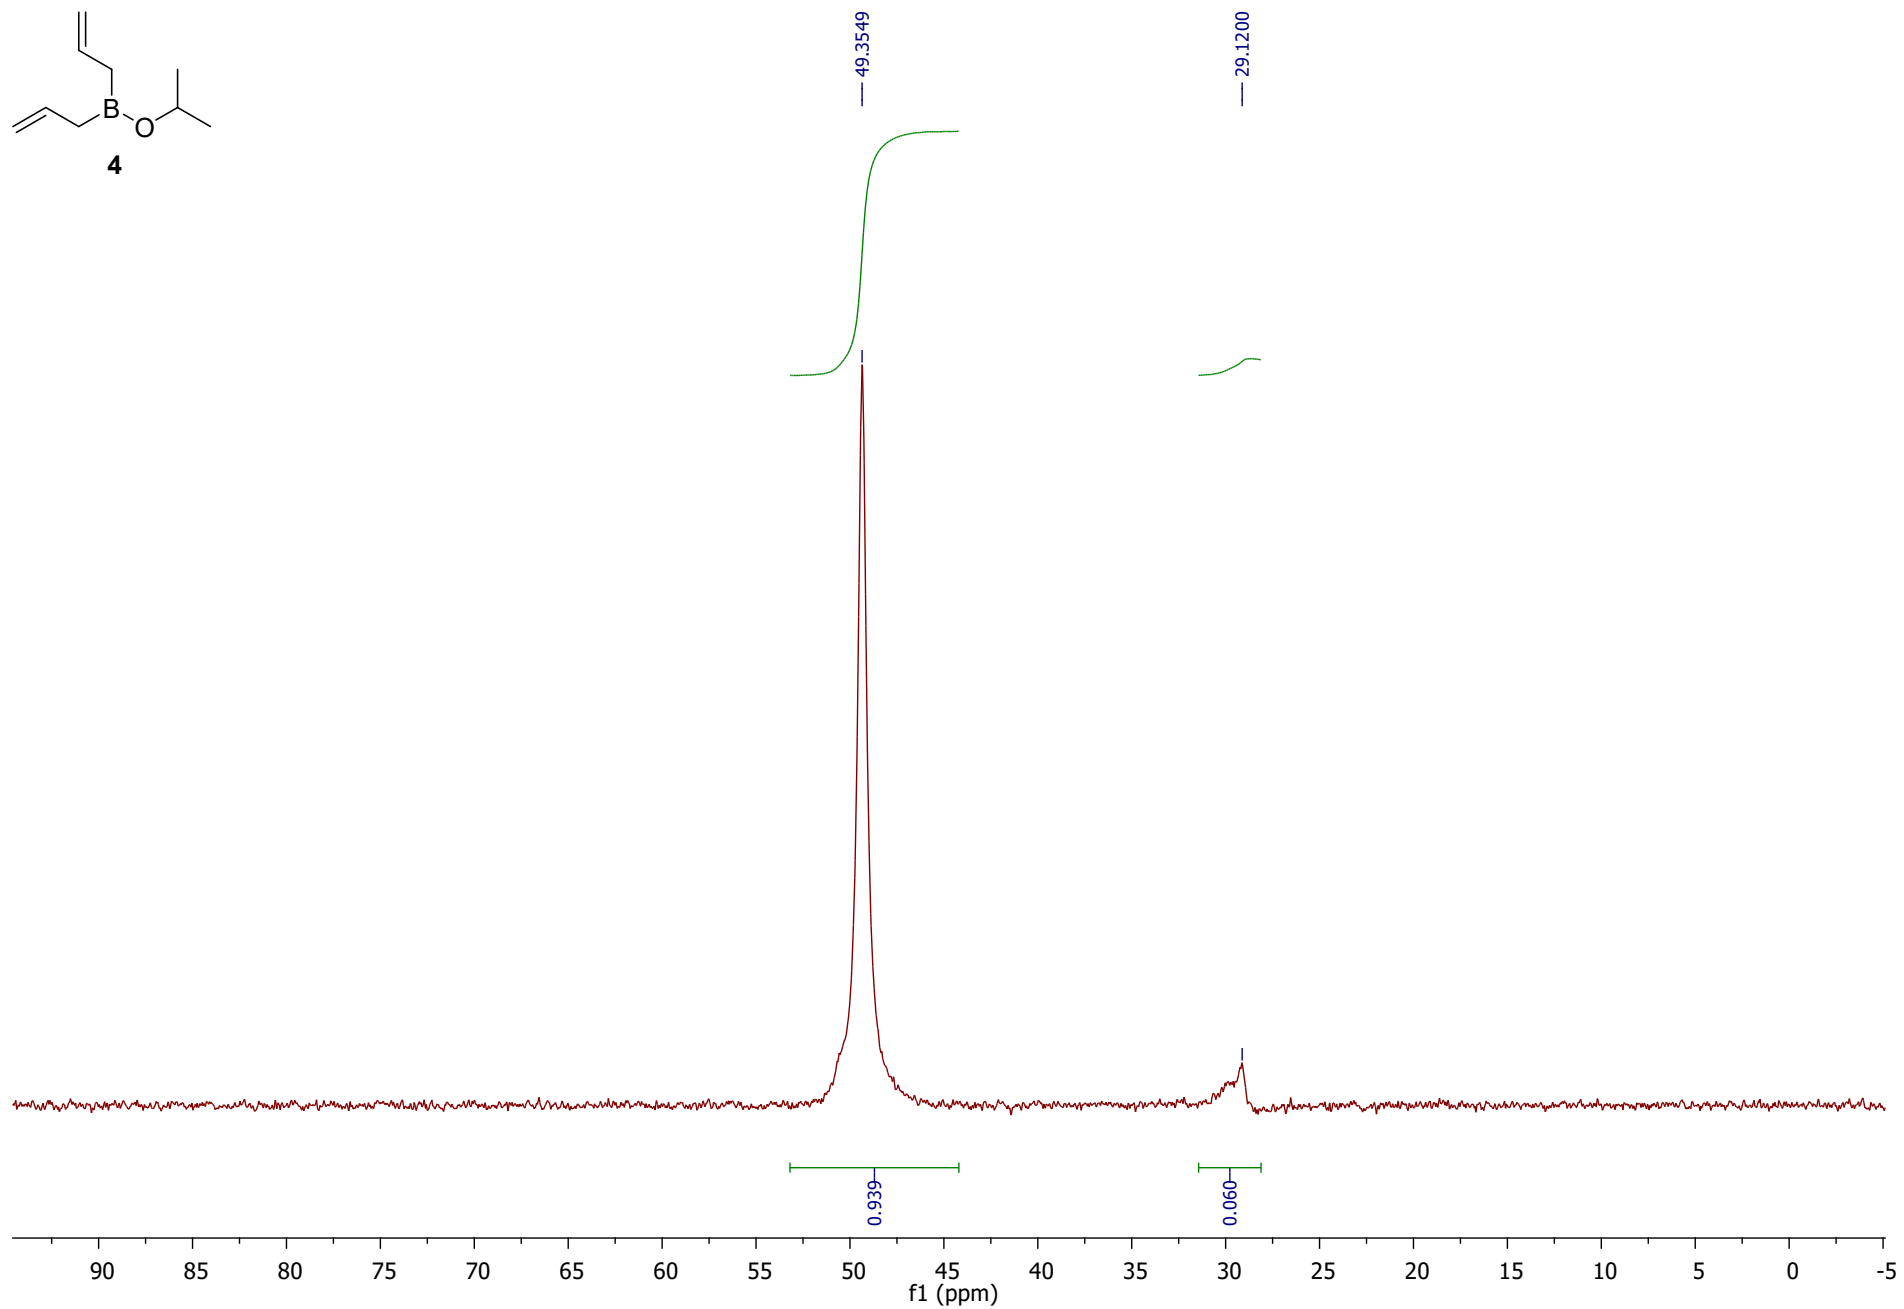

Methylamine adduct **1f**.  $^1\text{H}$  NMR (400 MHz,  $\text{C}_6\text{D}_6$ ) without additives.

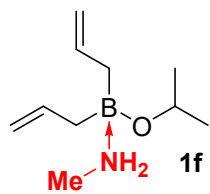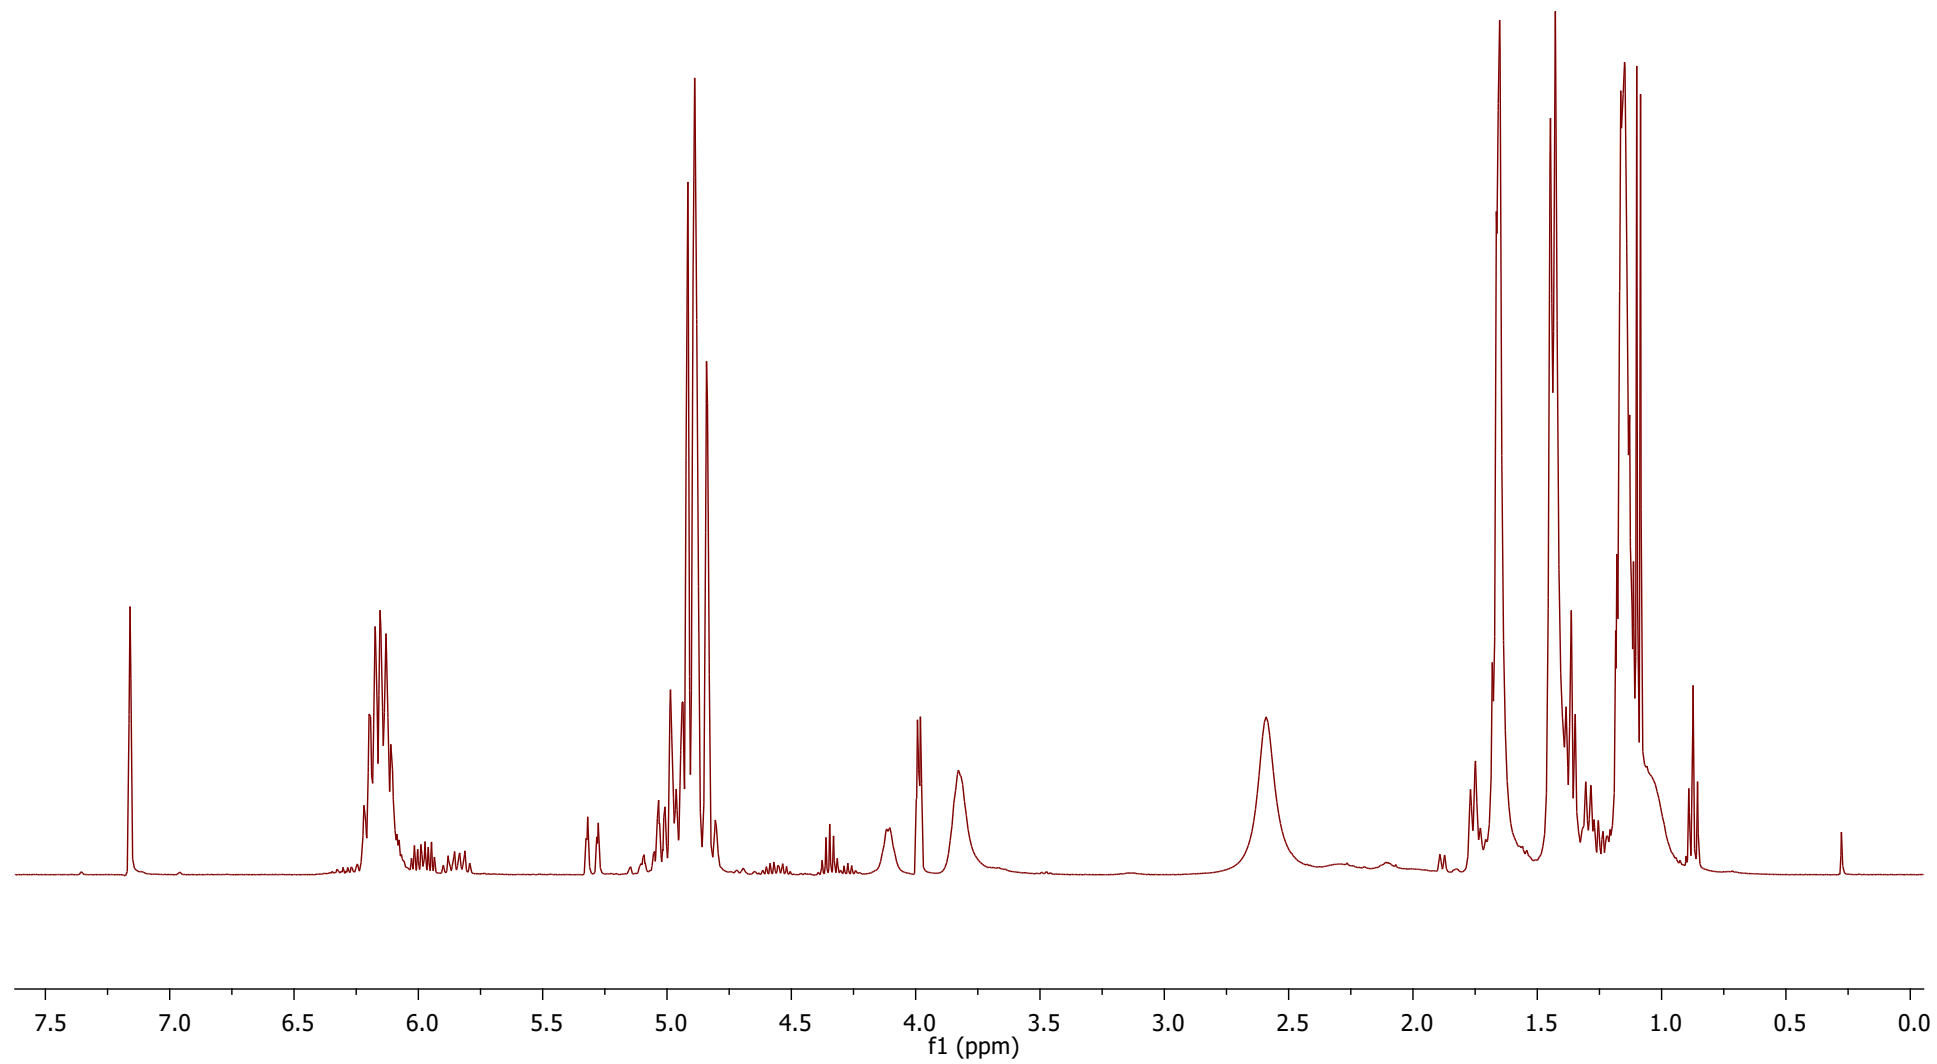

Methylamine adduct **1f**.  $^{11}\text{B}$  NMR (128 MHz,  $\text{C}_6\text{D}_6$ ) without additives.

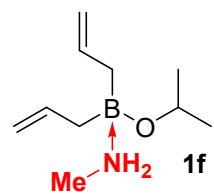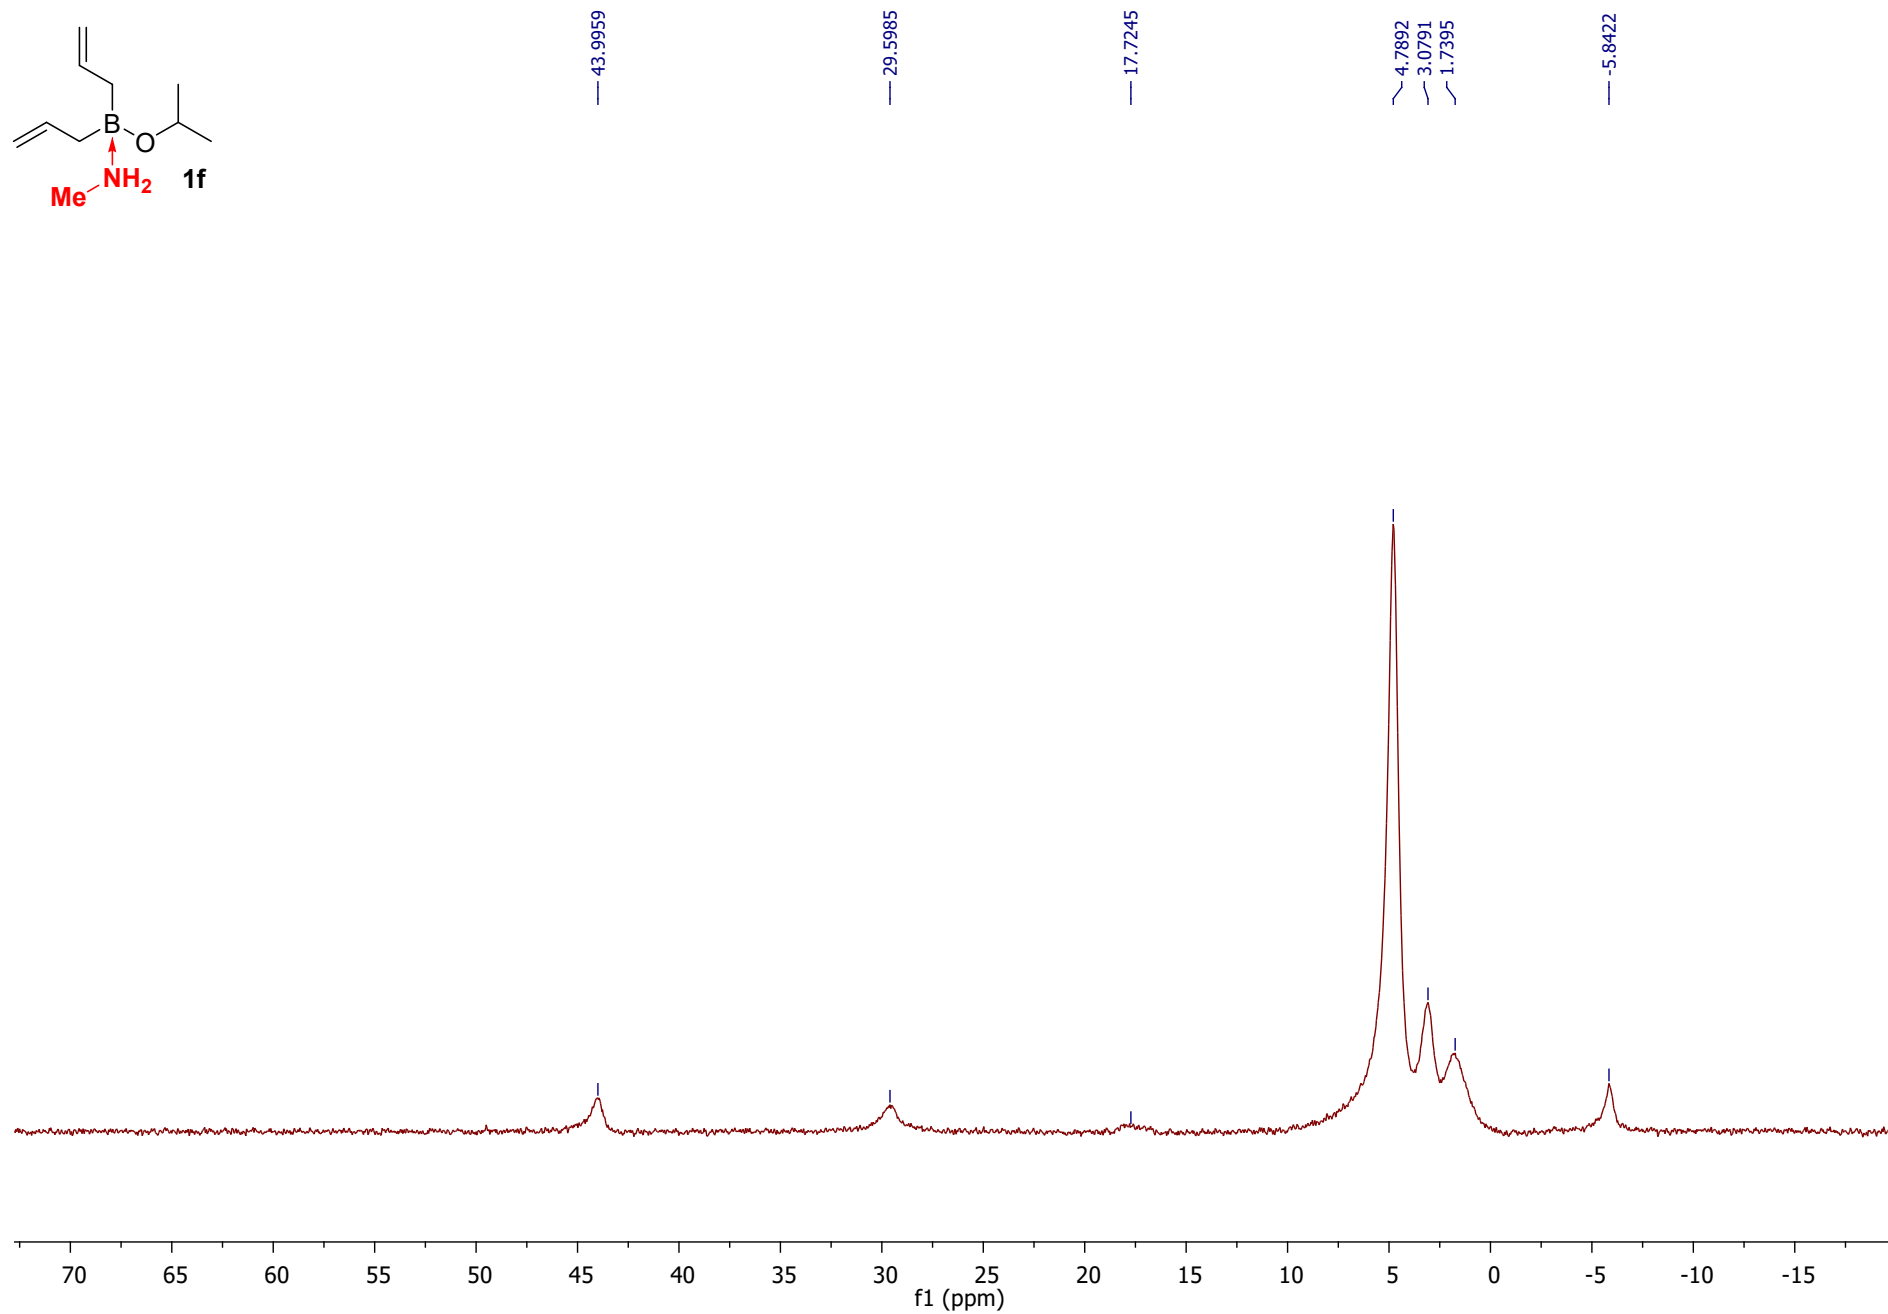

Methylamine adduct **1f**.  $^1\text{H}$  NMR (400 MHz,  $\text{C}_6\text{D}_6$ ) with addition of 1.5 equiv. of  $\text{MeNH}_2$  in  $i\text{PrOH}$  for stabilization).

Admixtures of \* -  $\text{Et}_2\text{O}$ ; \*\* -  $i\text{PrOH}$ ; \*\*\* -  $\text{MeNH}_2$ .

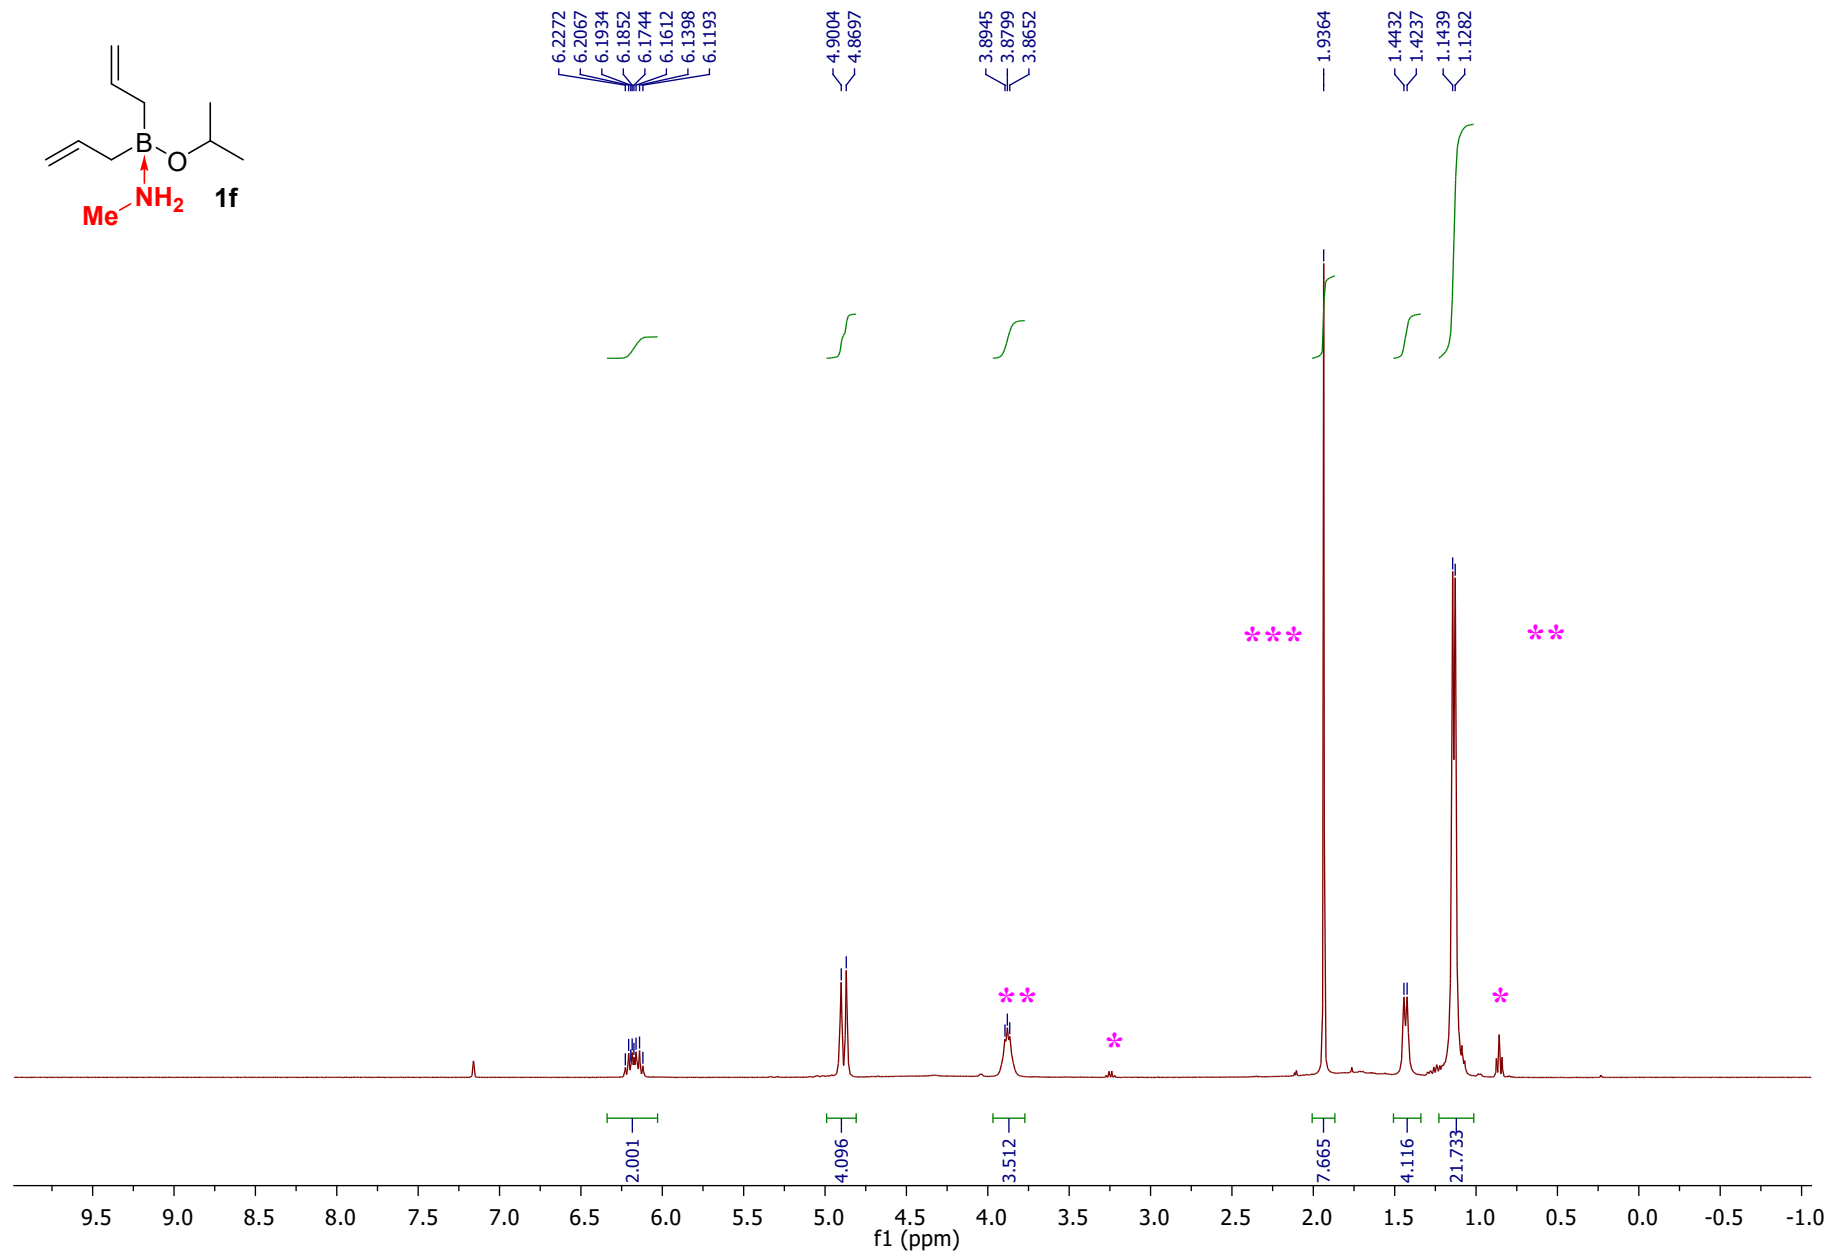

Methylamine adduct **1f**.  $^{13}\text{C}$  NMR (101 MHz,  $\text{C}_6\text{D}_6$ ) with addition of 1.5 equiv. of  $\text{MeNH}_2$  in *i*PrOH for stabilization)..

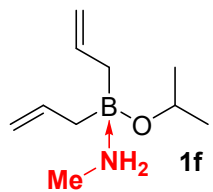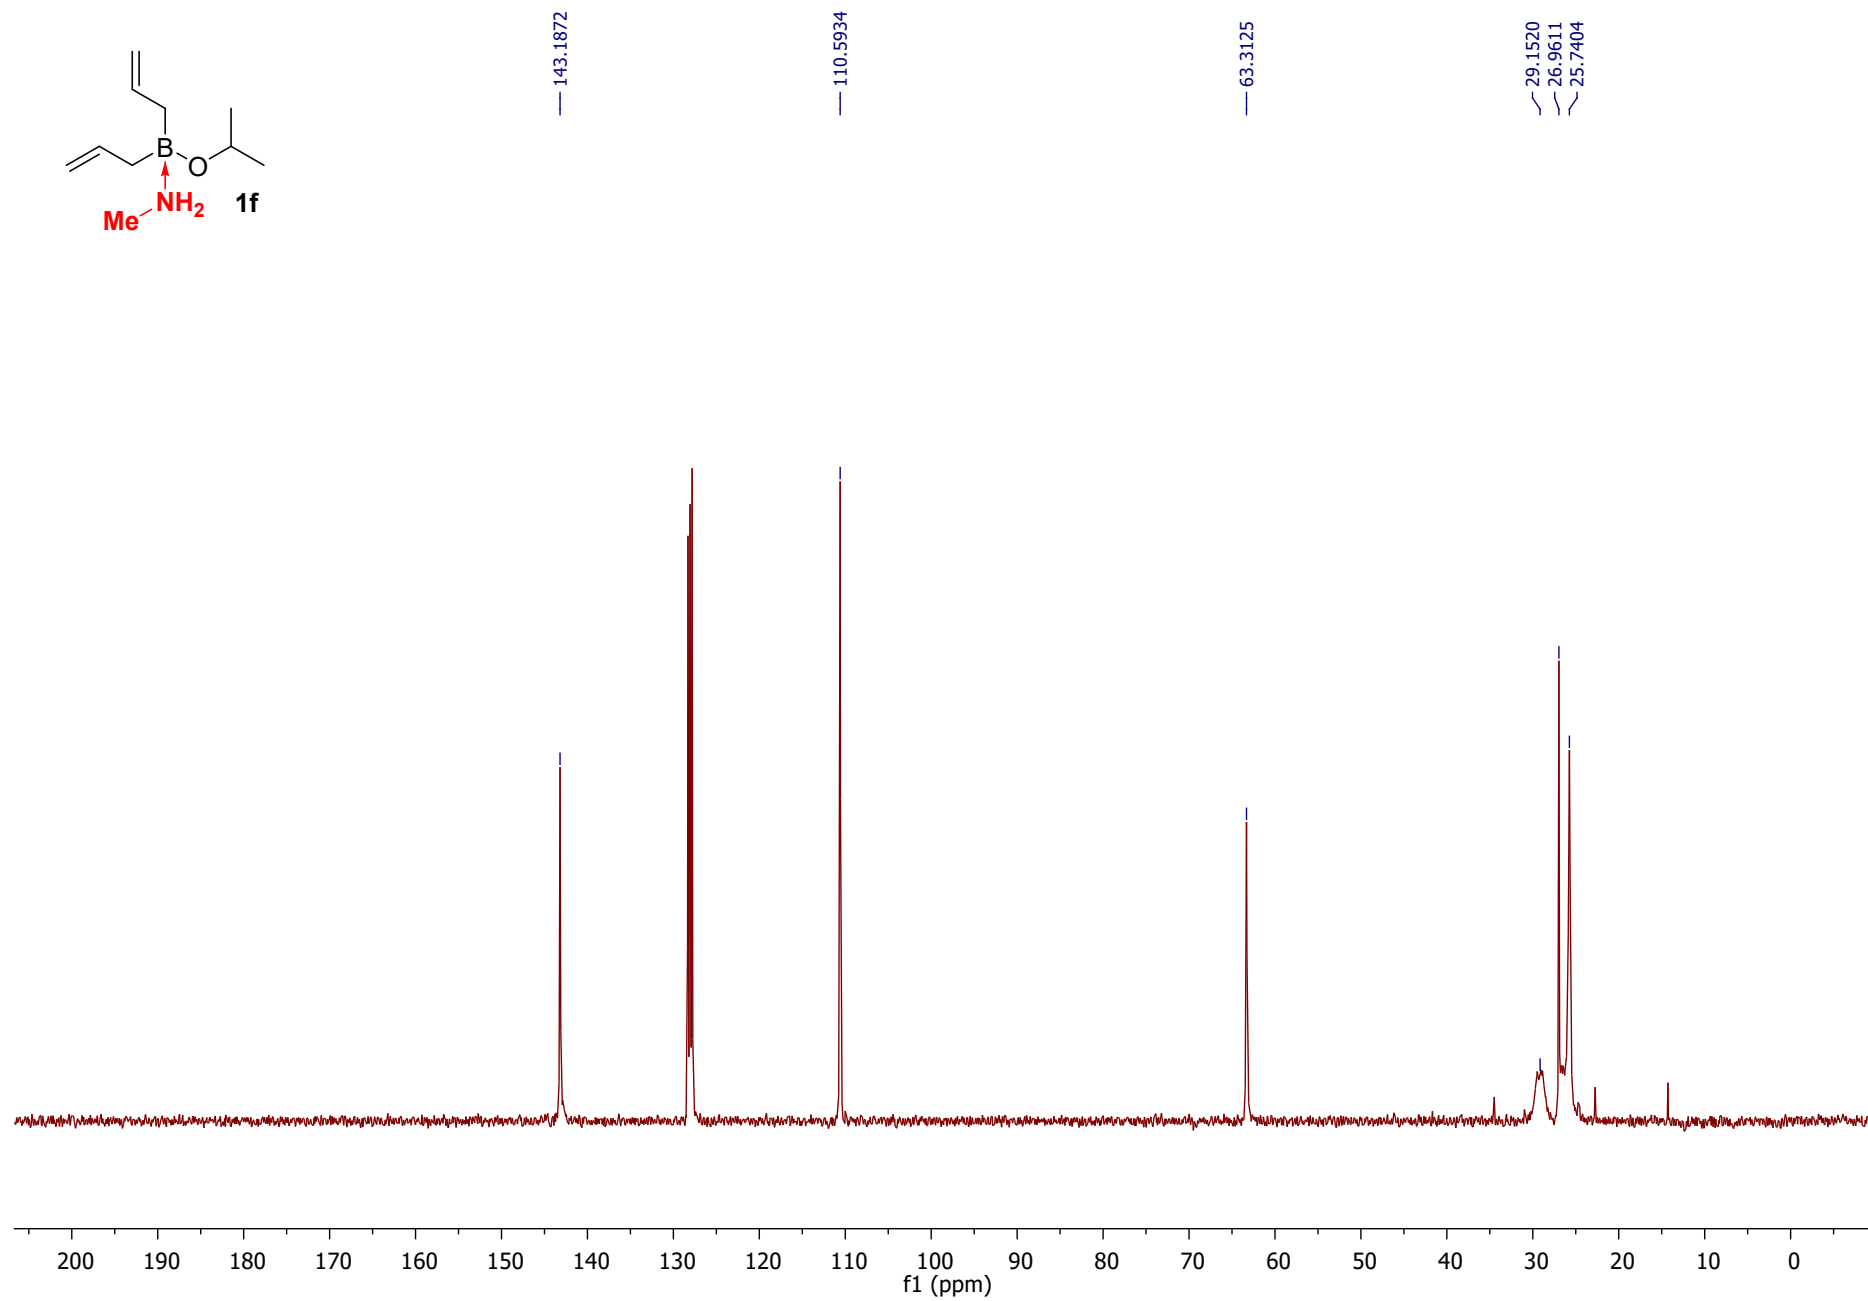

Methylamine adduct **1f**.  $^{11}\text{B}$  NMR (128 MHz,  $\text{C}_6\text{D}_6$ ) with addition of 2 equiv. of  $\text{MeNH}_2$  in *i*PrOH for stabilization.

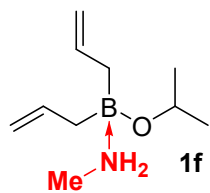

— 2.4207

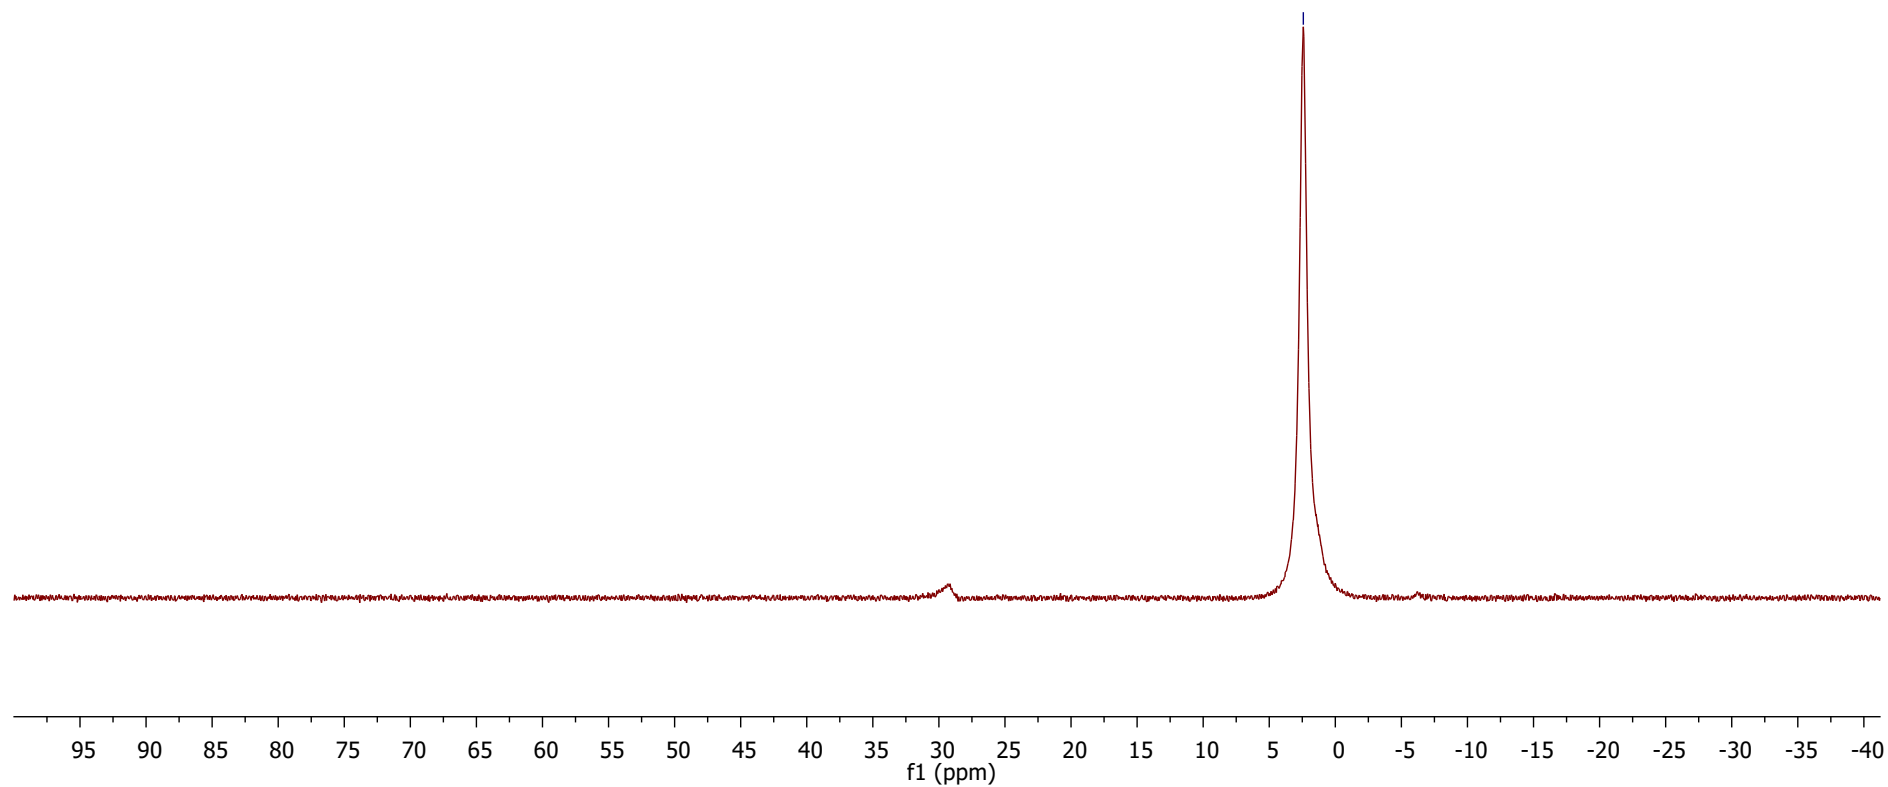

Allyl(diisopropoxy)borane **5**.  $^1\text{H}$  (400 MHz,  $\text{CDCl}_3$ ).

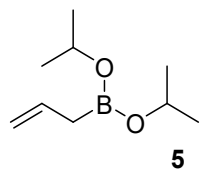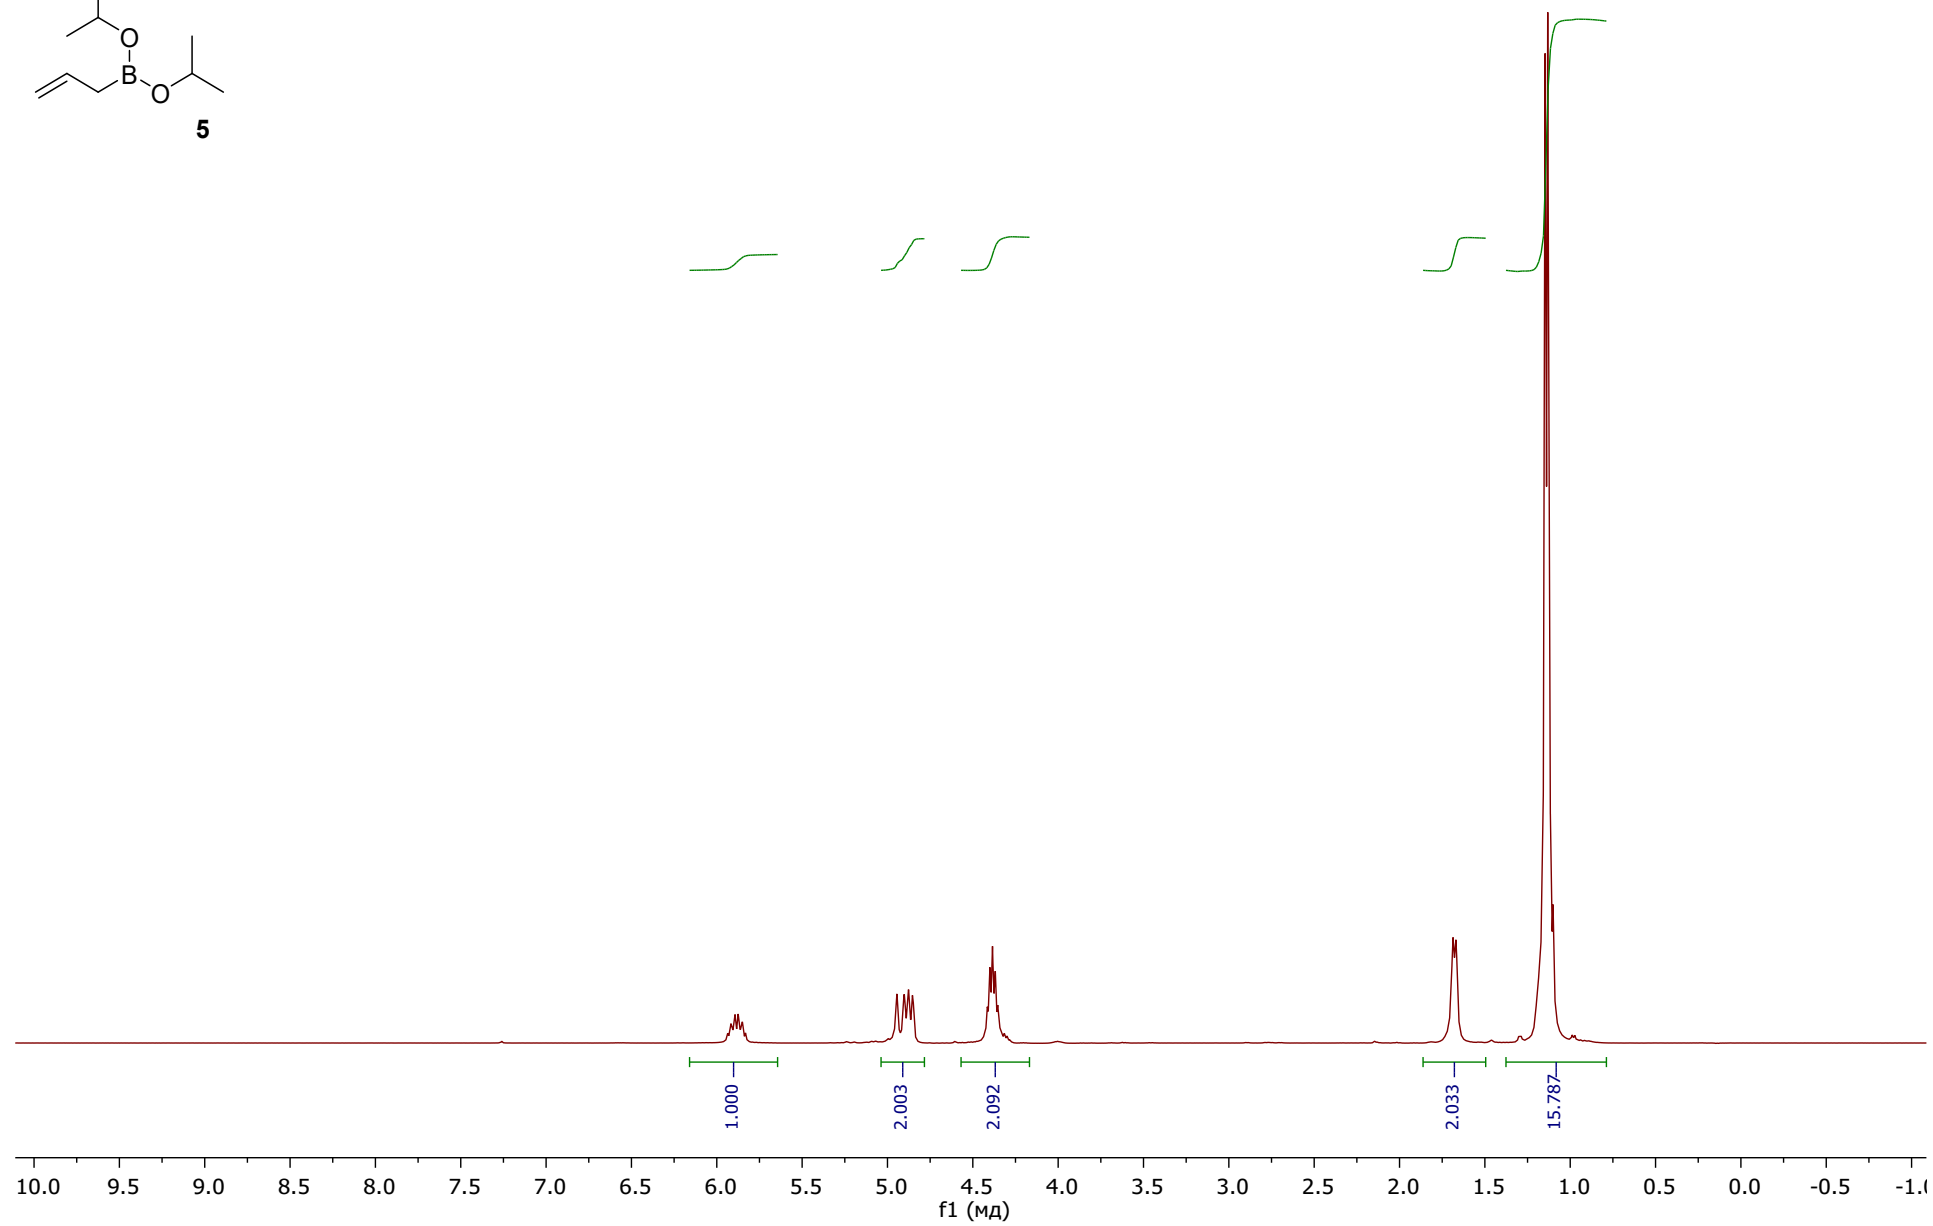

Allyl(diisopropoxy)borane **5**.  $^{11}\text{B}$  (128 MHz,  $\text{CDCl}_3$ ); admixture of  $\text{B}(\text{O}i\text{Pr})_3$  4.8%.

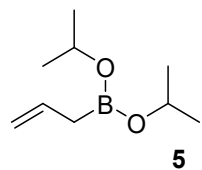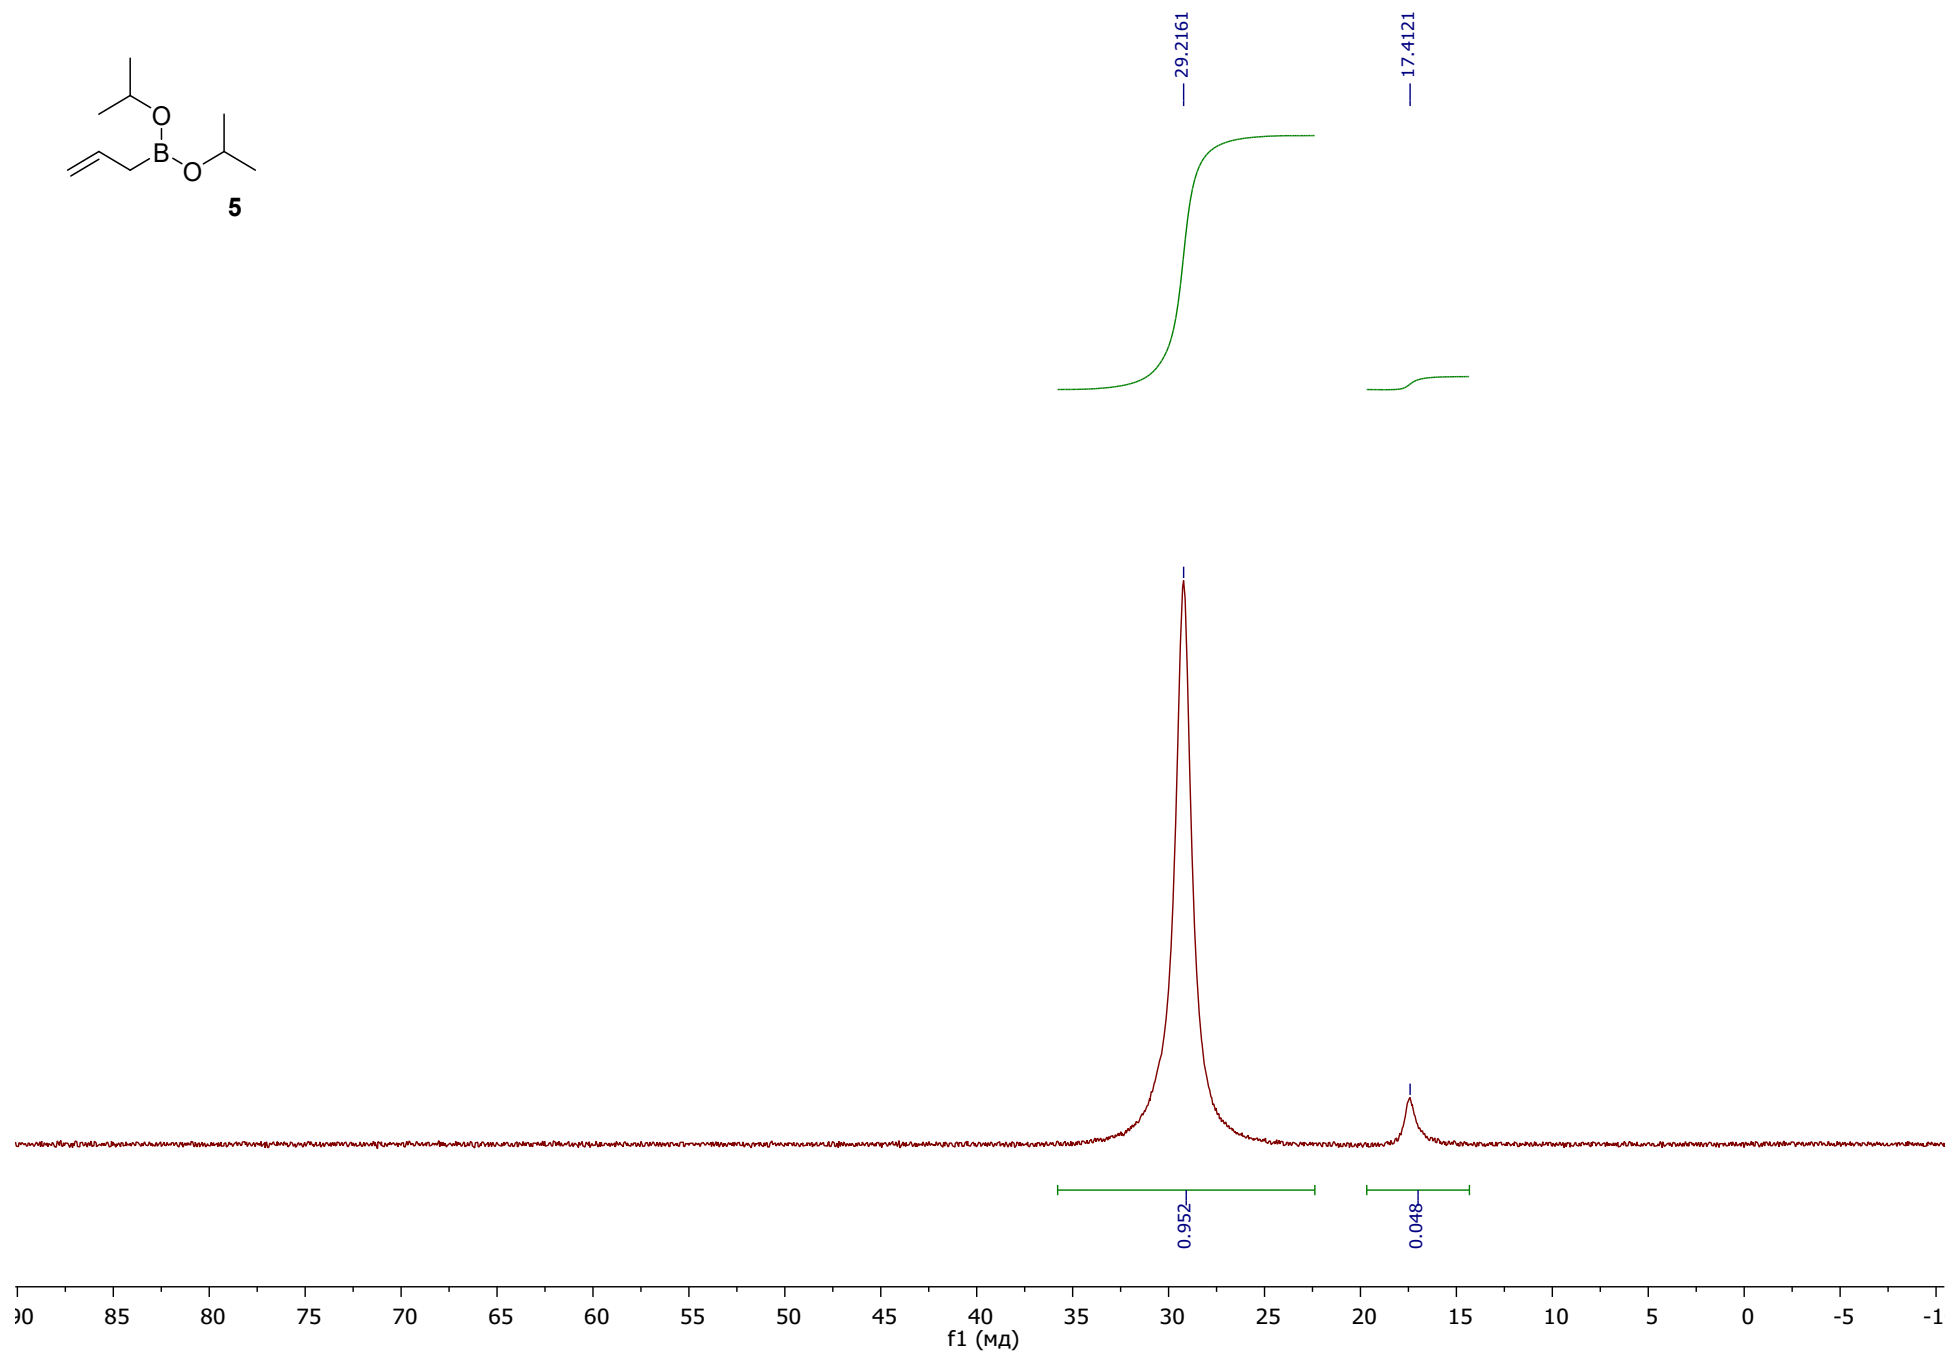



Allyl(diisopropoxy)borane **5**.  $^{13}\text{C}$  (101 MHz,  $\text{CDCl}_3$ ); admixture of  $\text{B}(\text{O}i\text{Pr})_3$ .

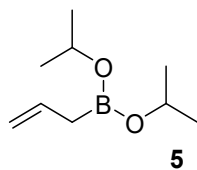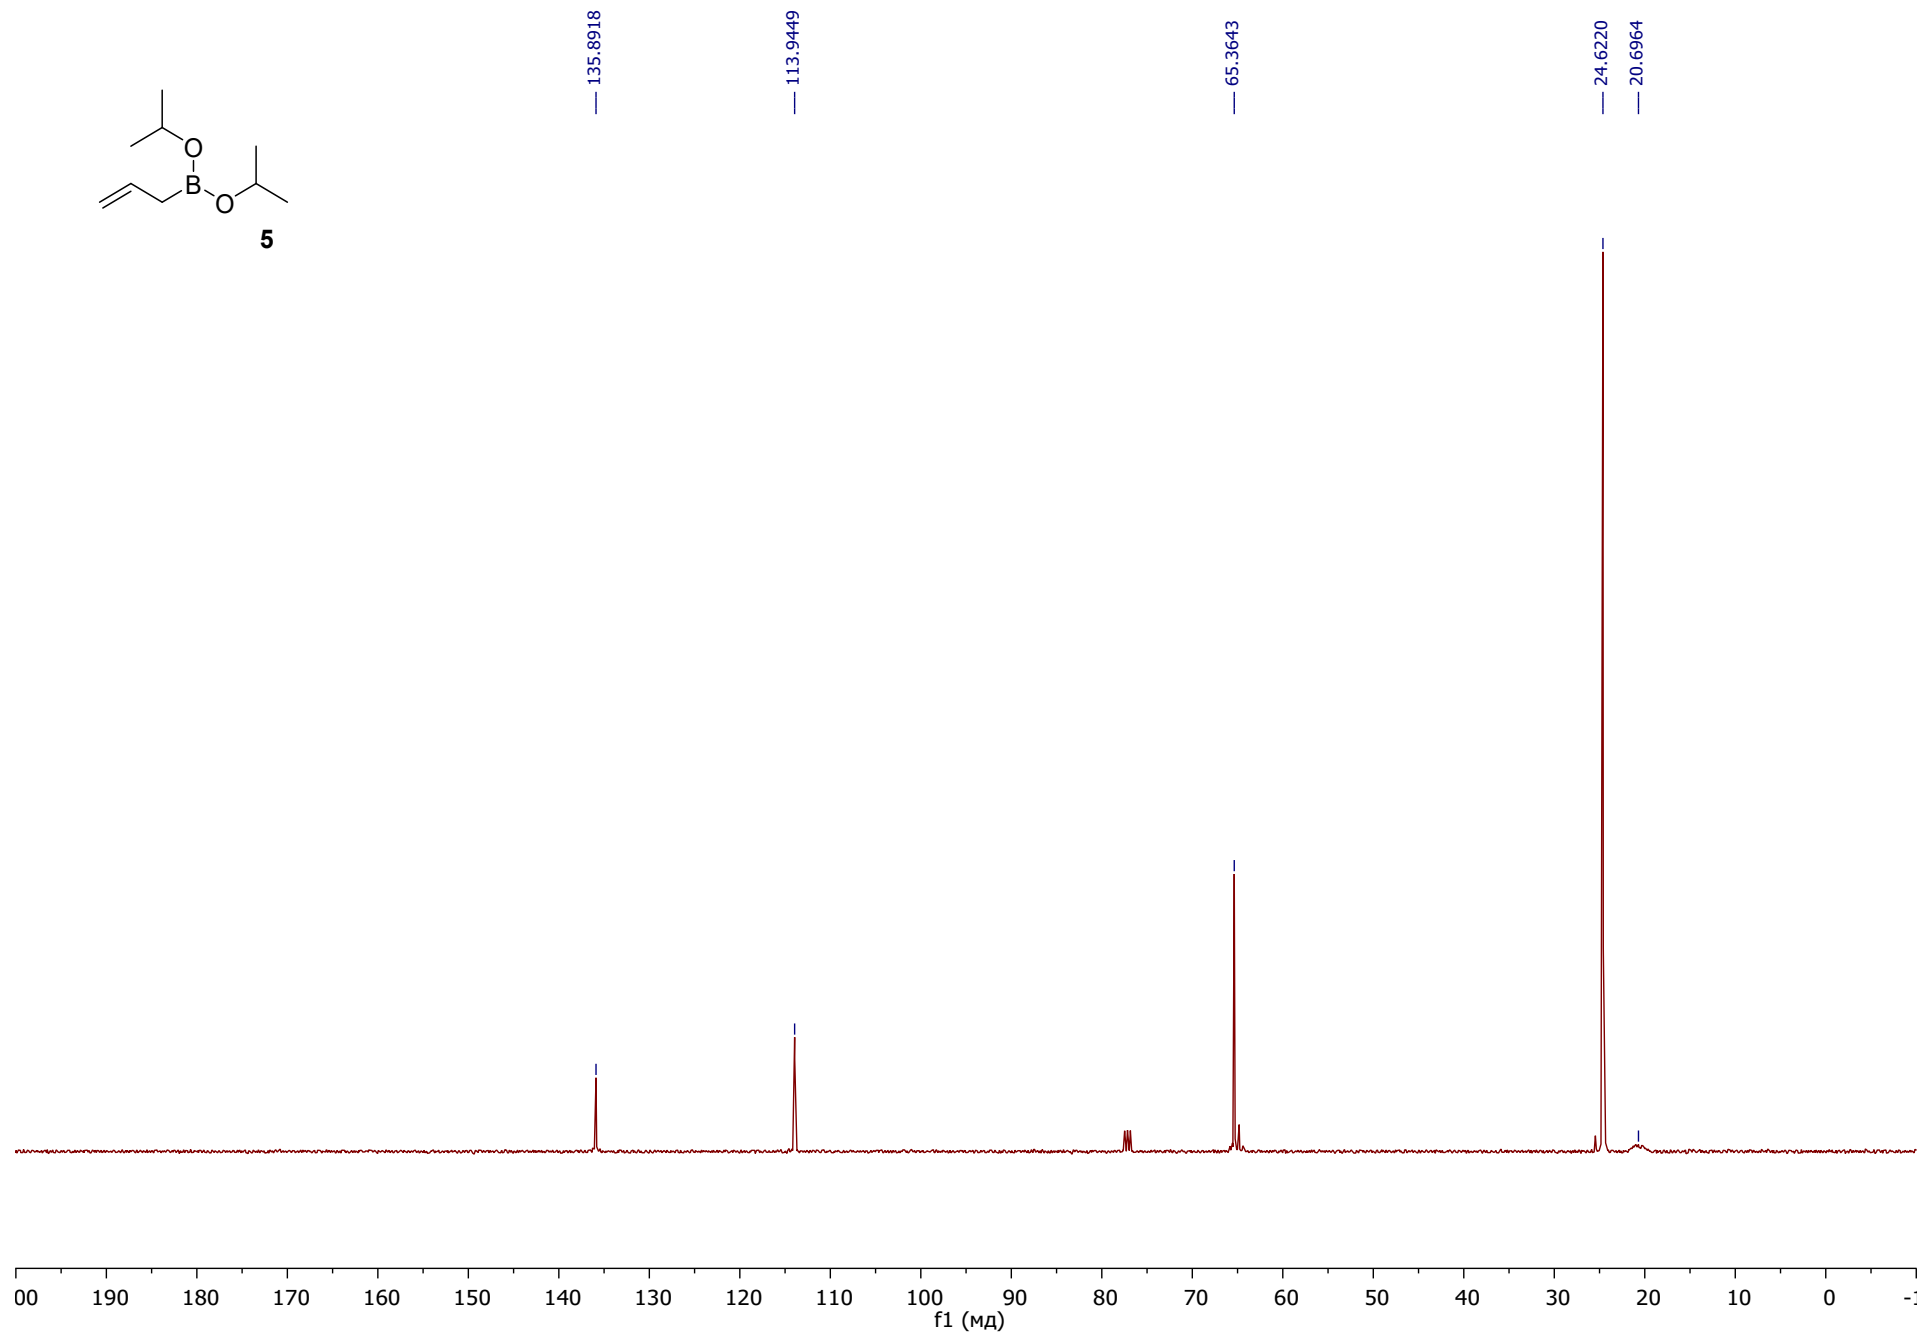

$^1\text{H}$  NMR ( $\text{CDCl}_3$ , 400 MHz) [Cu-1]

$\text{Cu}(\text{PPh}_3)_3\text{F}\cdot 2\text{EtOH}$

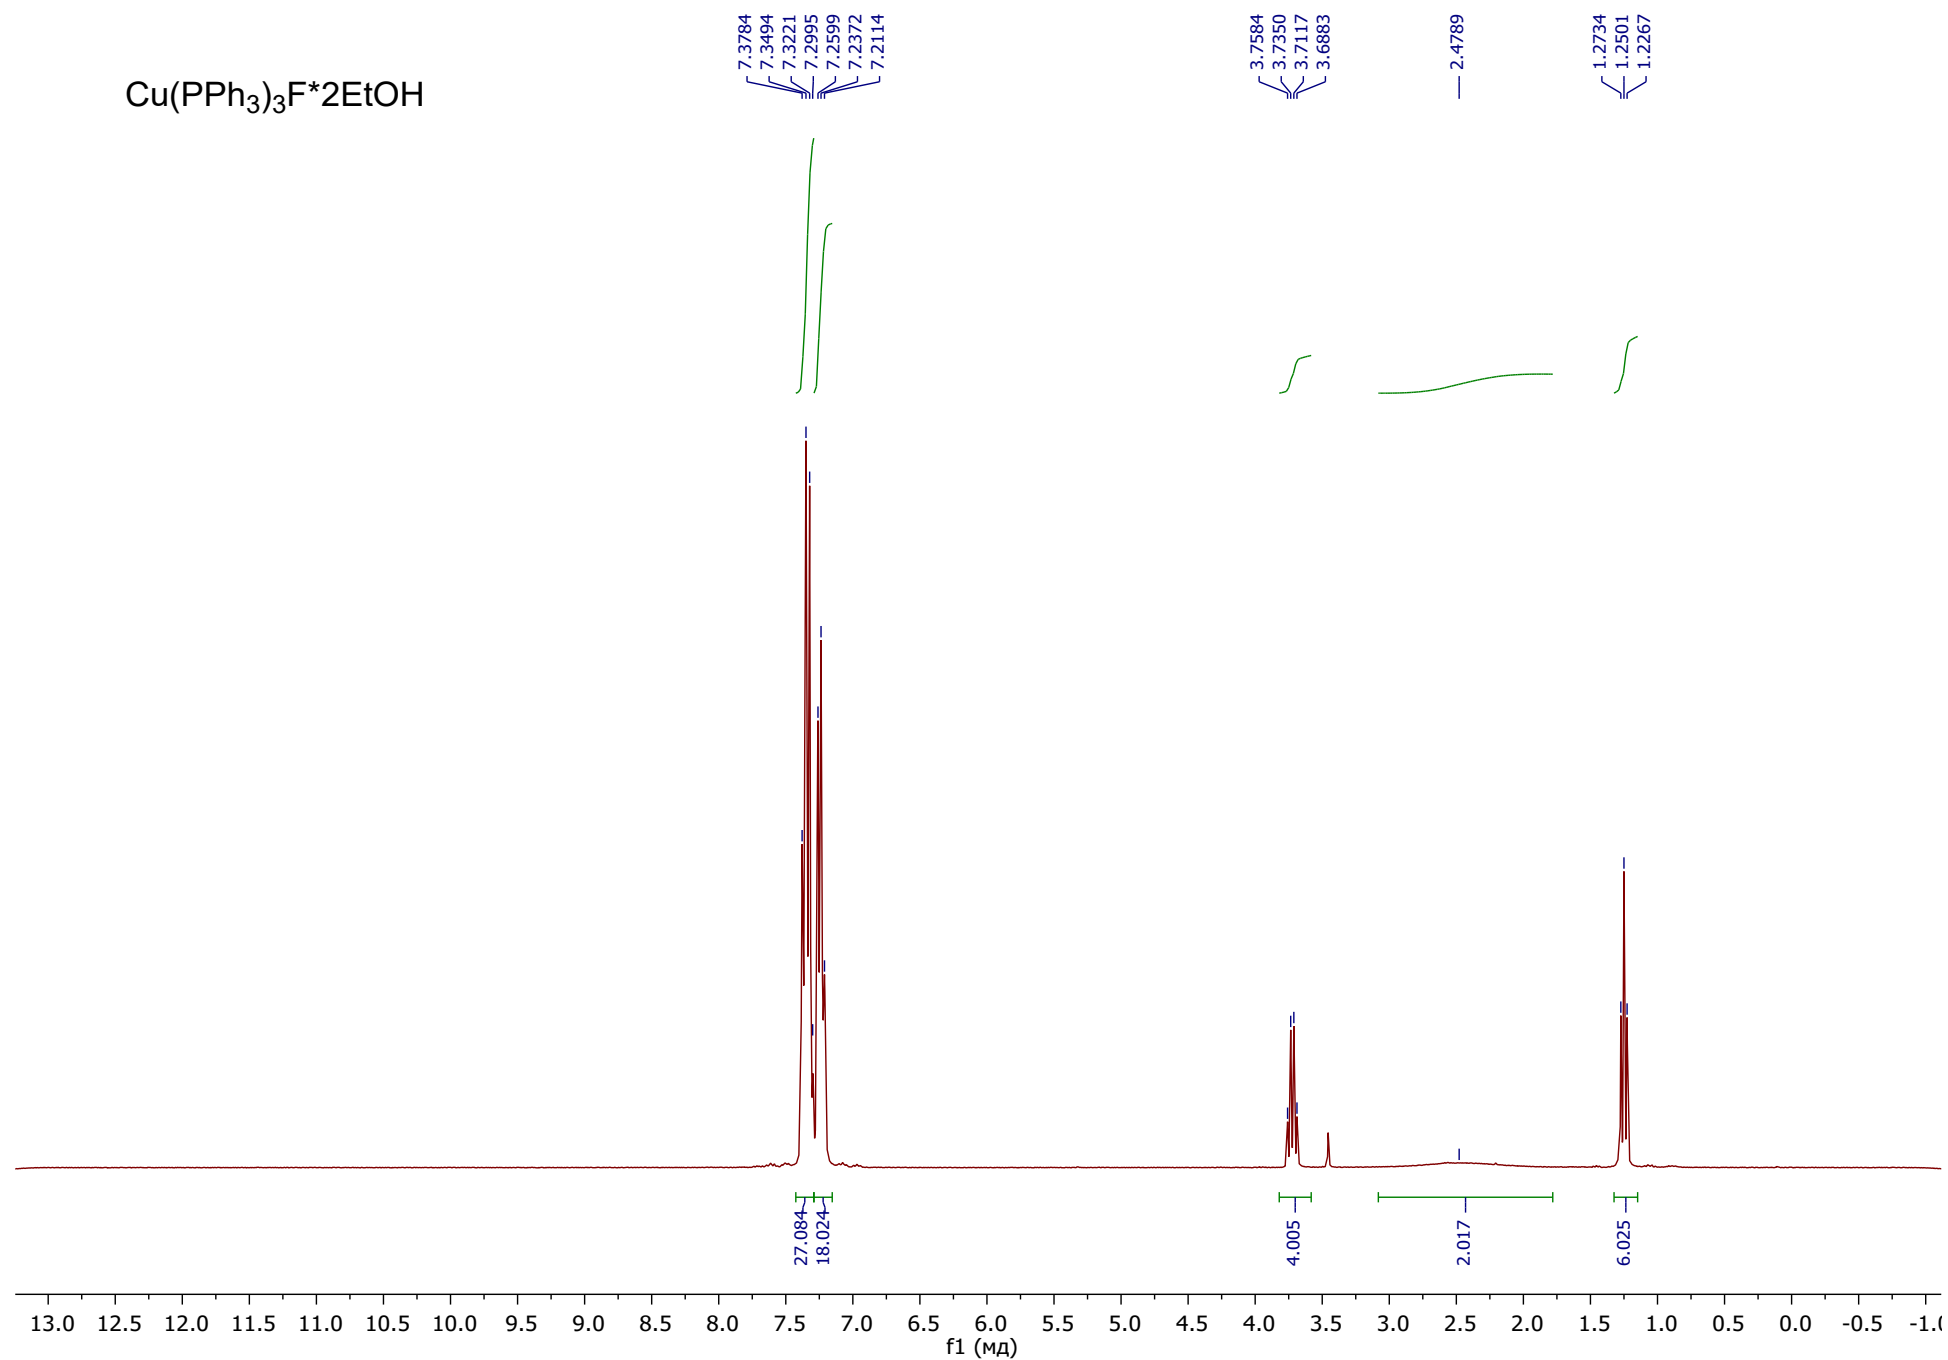

$^{31}\text{P}$  NMR ( $\text{CDCl}_3$ , 121 MHz) [Cu-1]

$\text{Cu}(\text{PPh}_3)_3\text{F}\cdot 2\text{EtOH}$

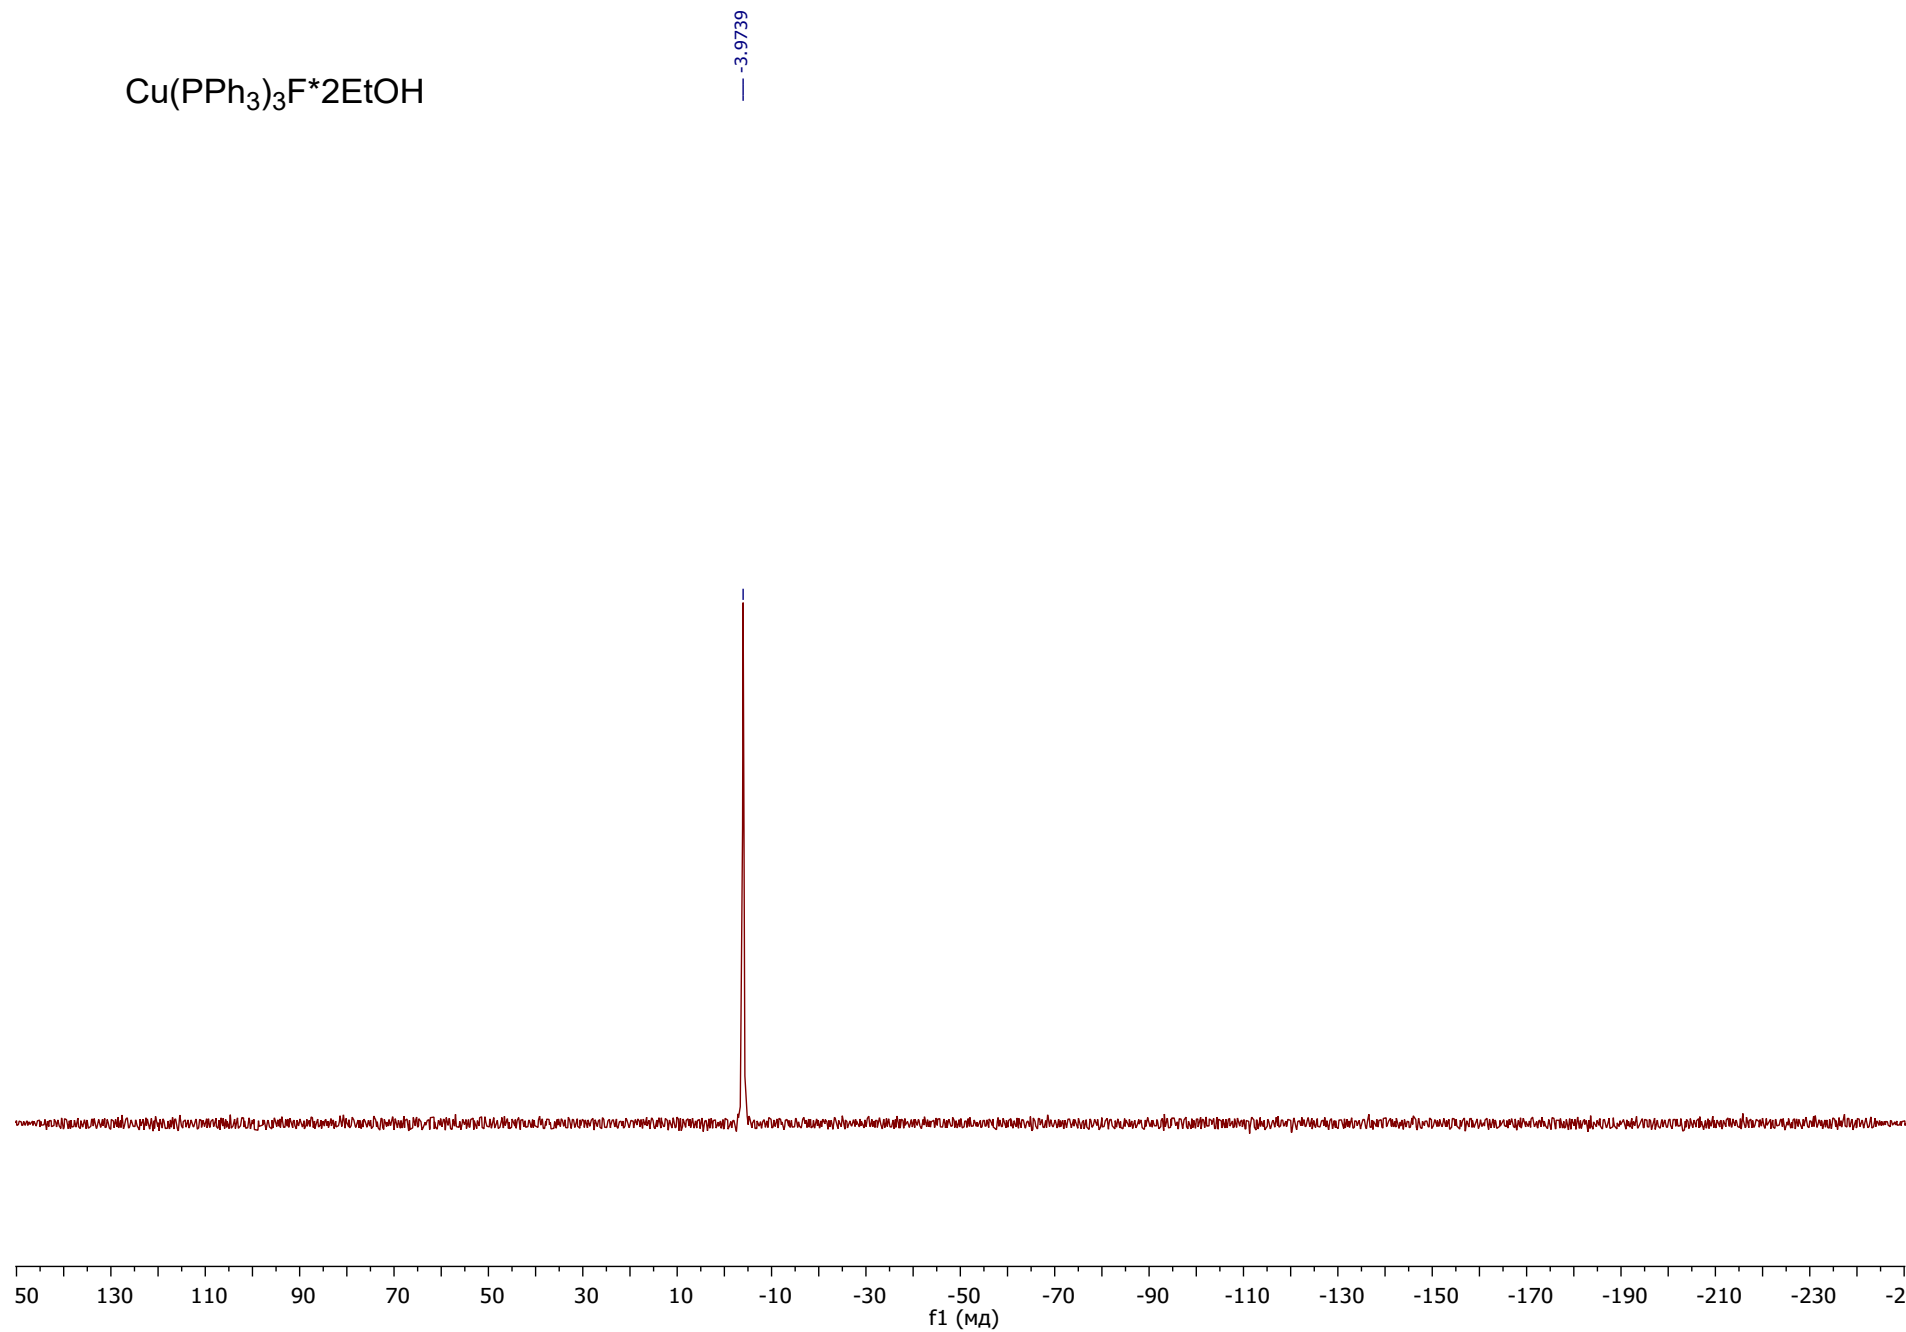

$^1\text{H}$  NMR ( $\text{CDCl}_3$ , 400 MHz) [Cu-2]

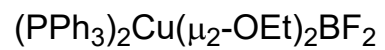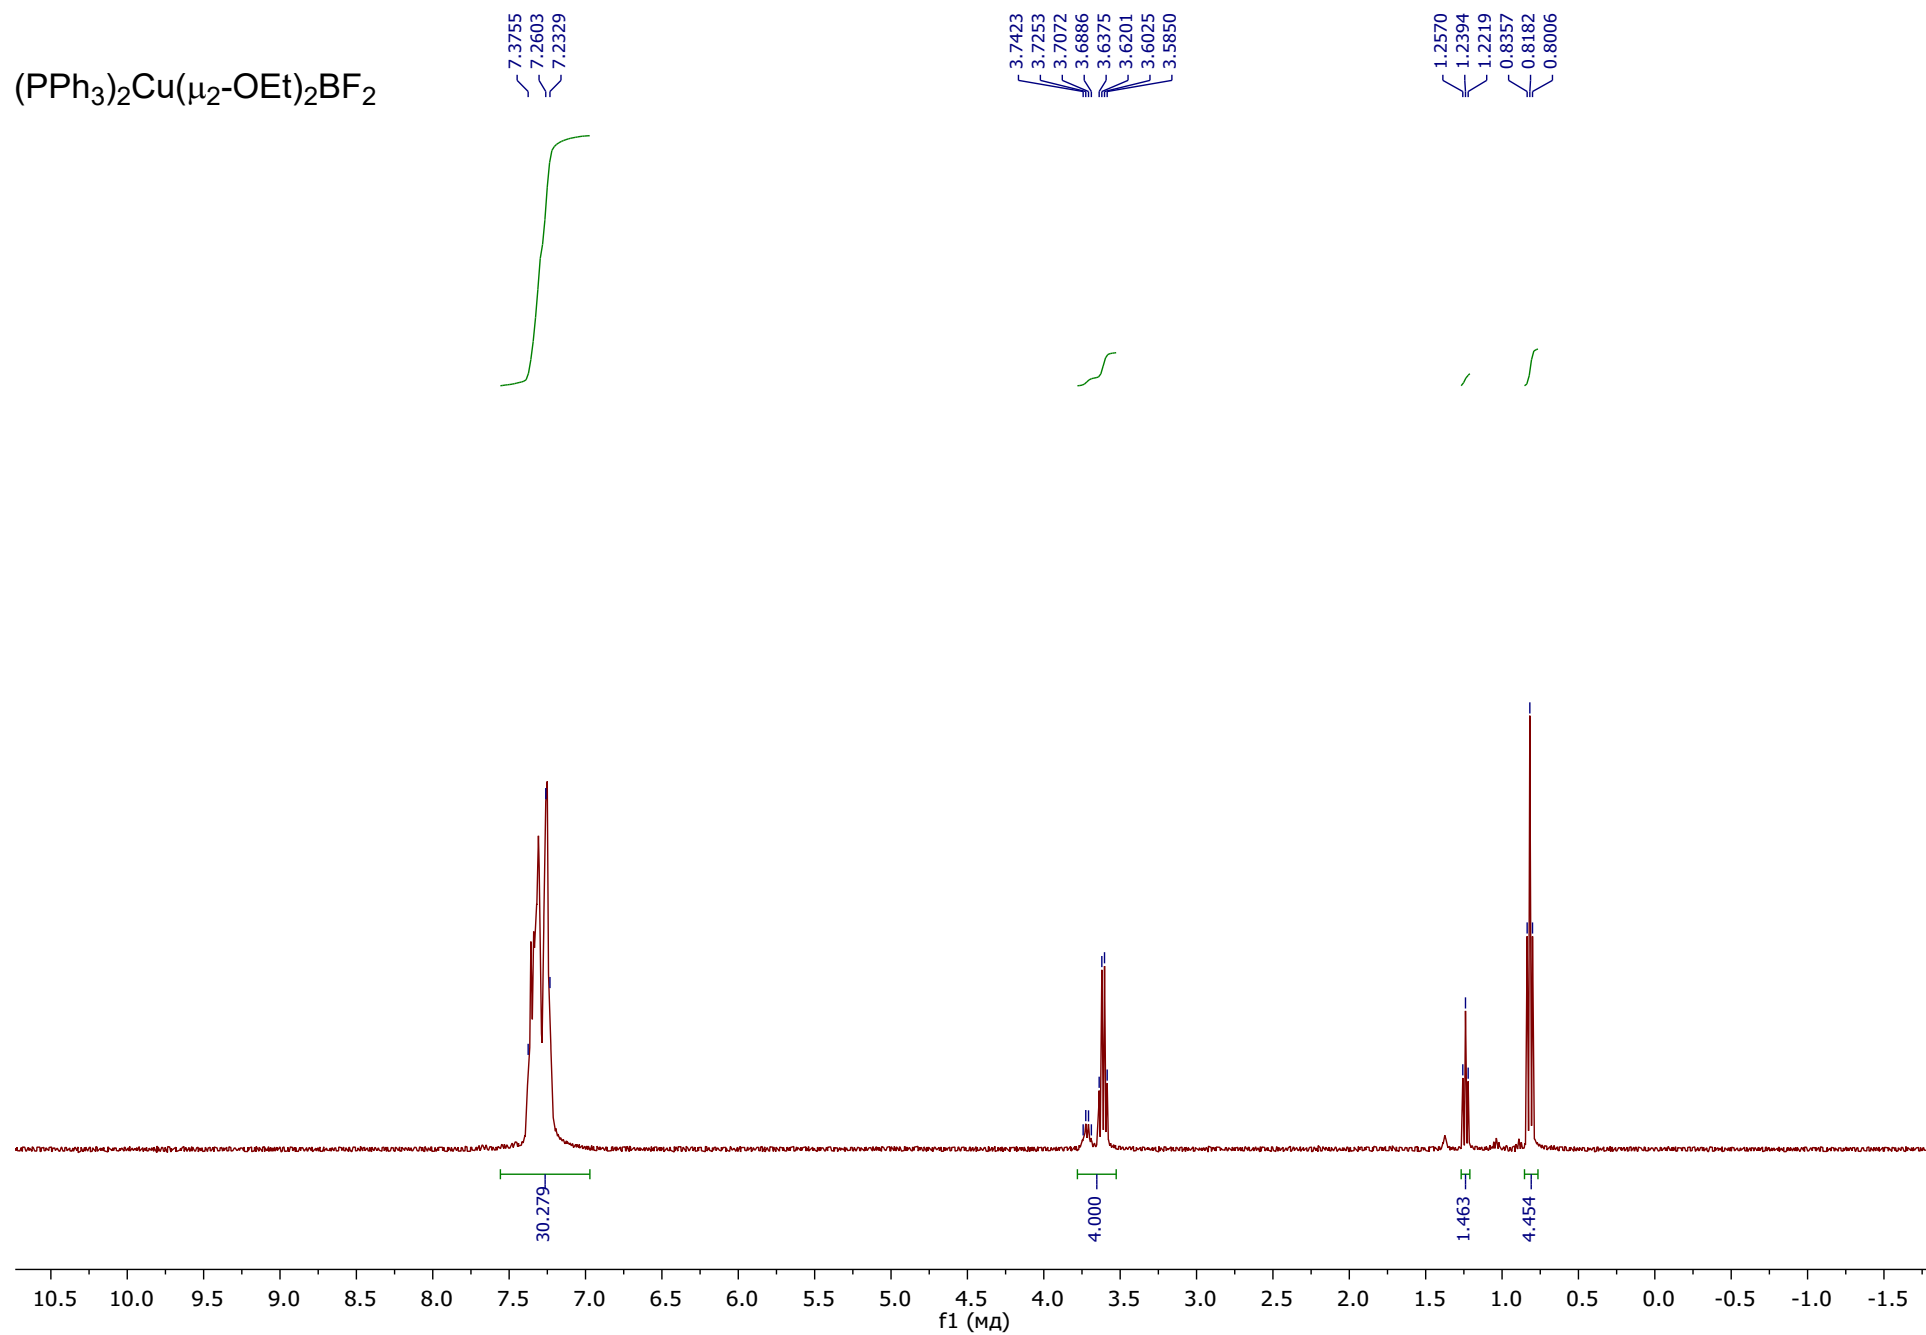

$^{13}\text{C}$  NMR ( $\text{CDCl}_3$ , 101 MHz) [Cu-2]

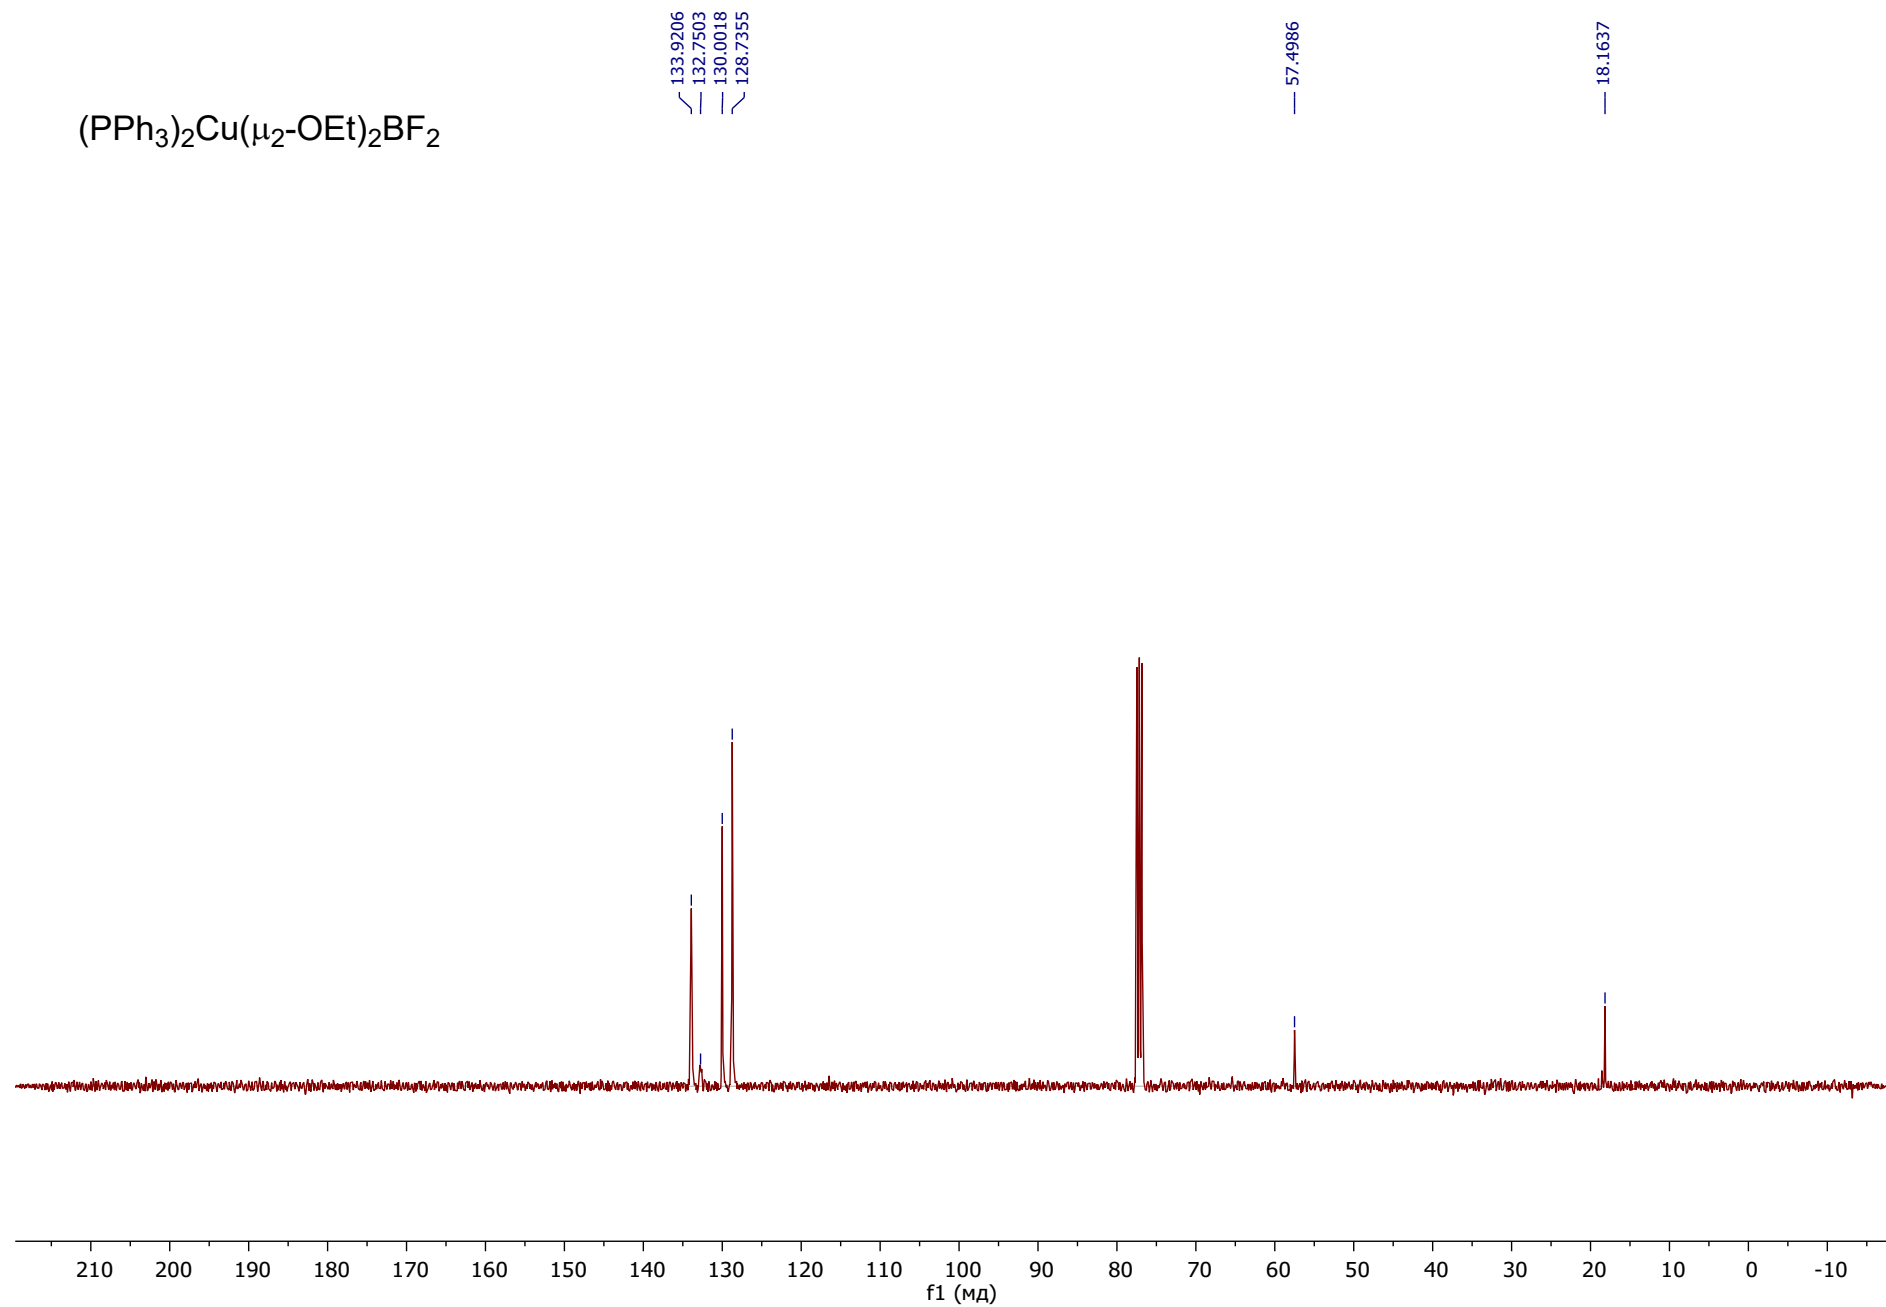

$^{31}\text{P}$  NMR ( $\text{CDCl}_3$ , 121 MHz) [Cu-2]

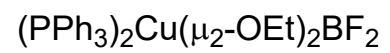

— -3.2093

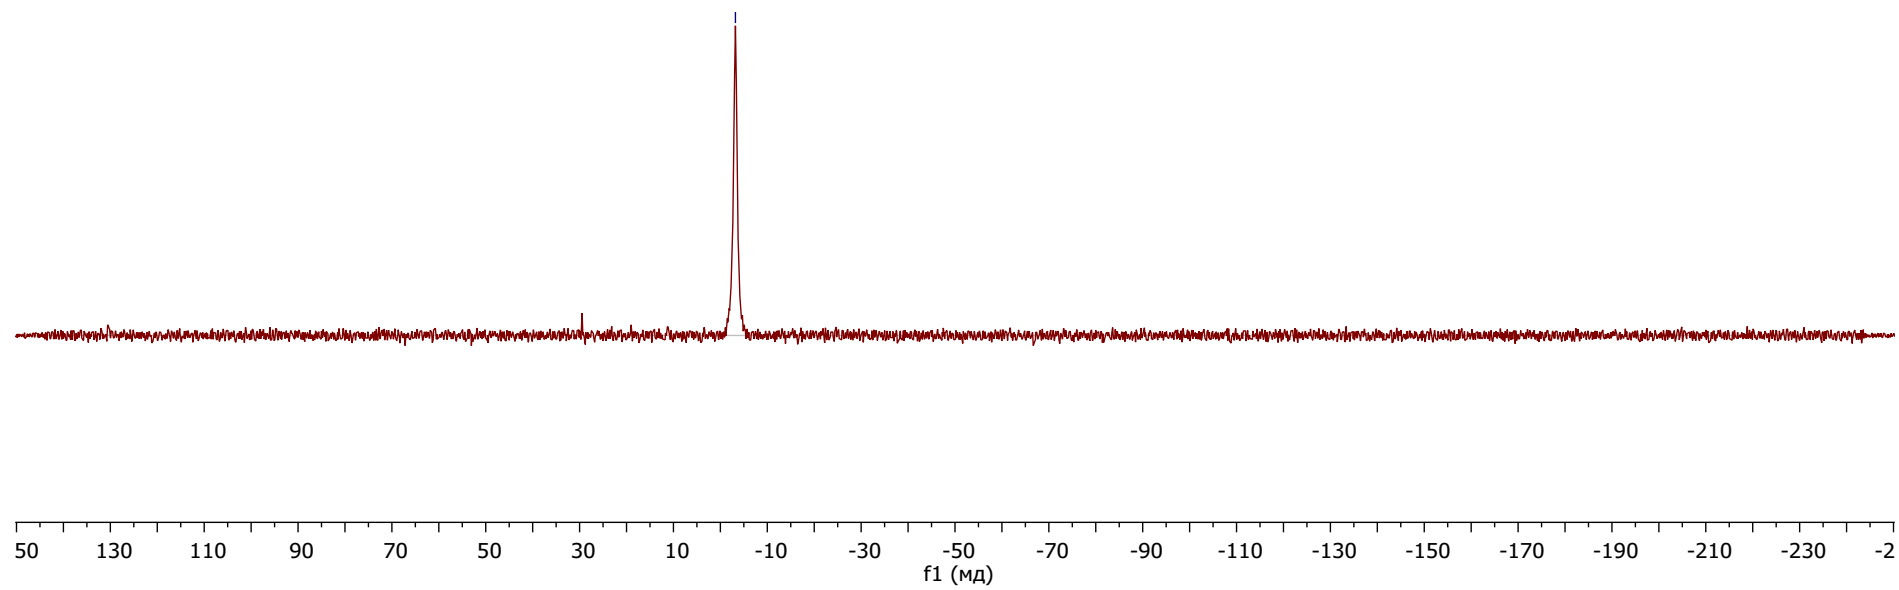

$^{11}\text{B}$  NMR ( $\text{CDCl}_3$ , 128 MHz) [Cu-2]

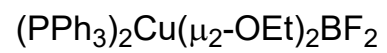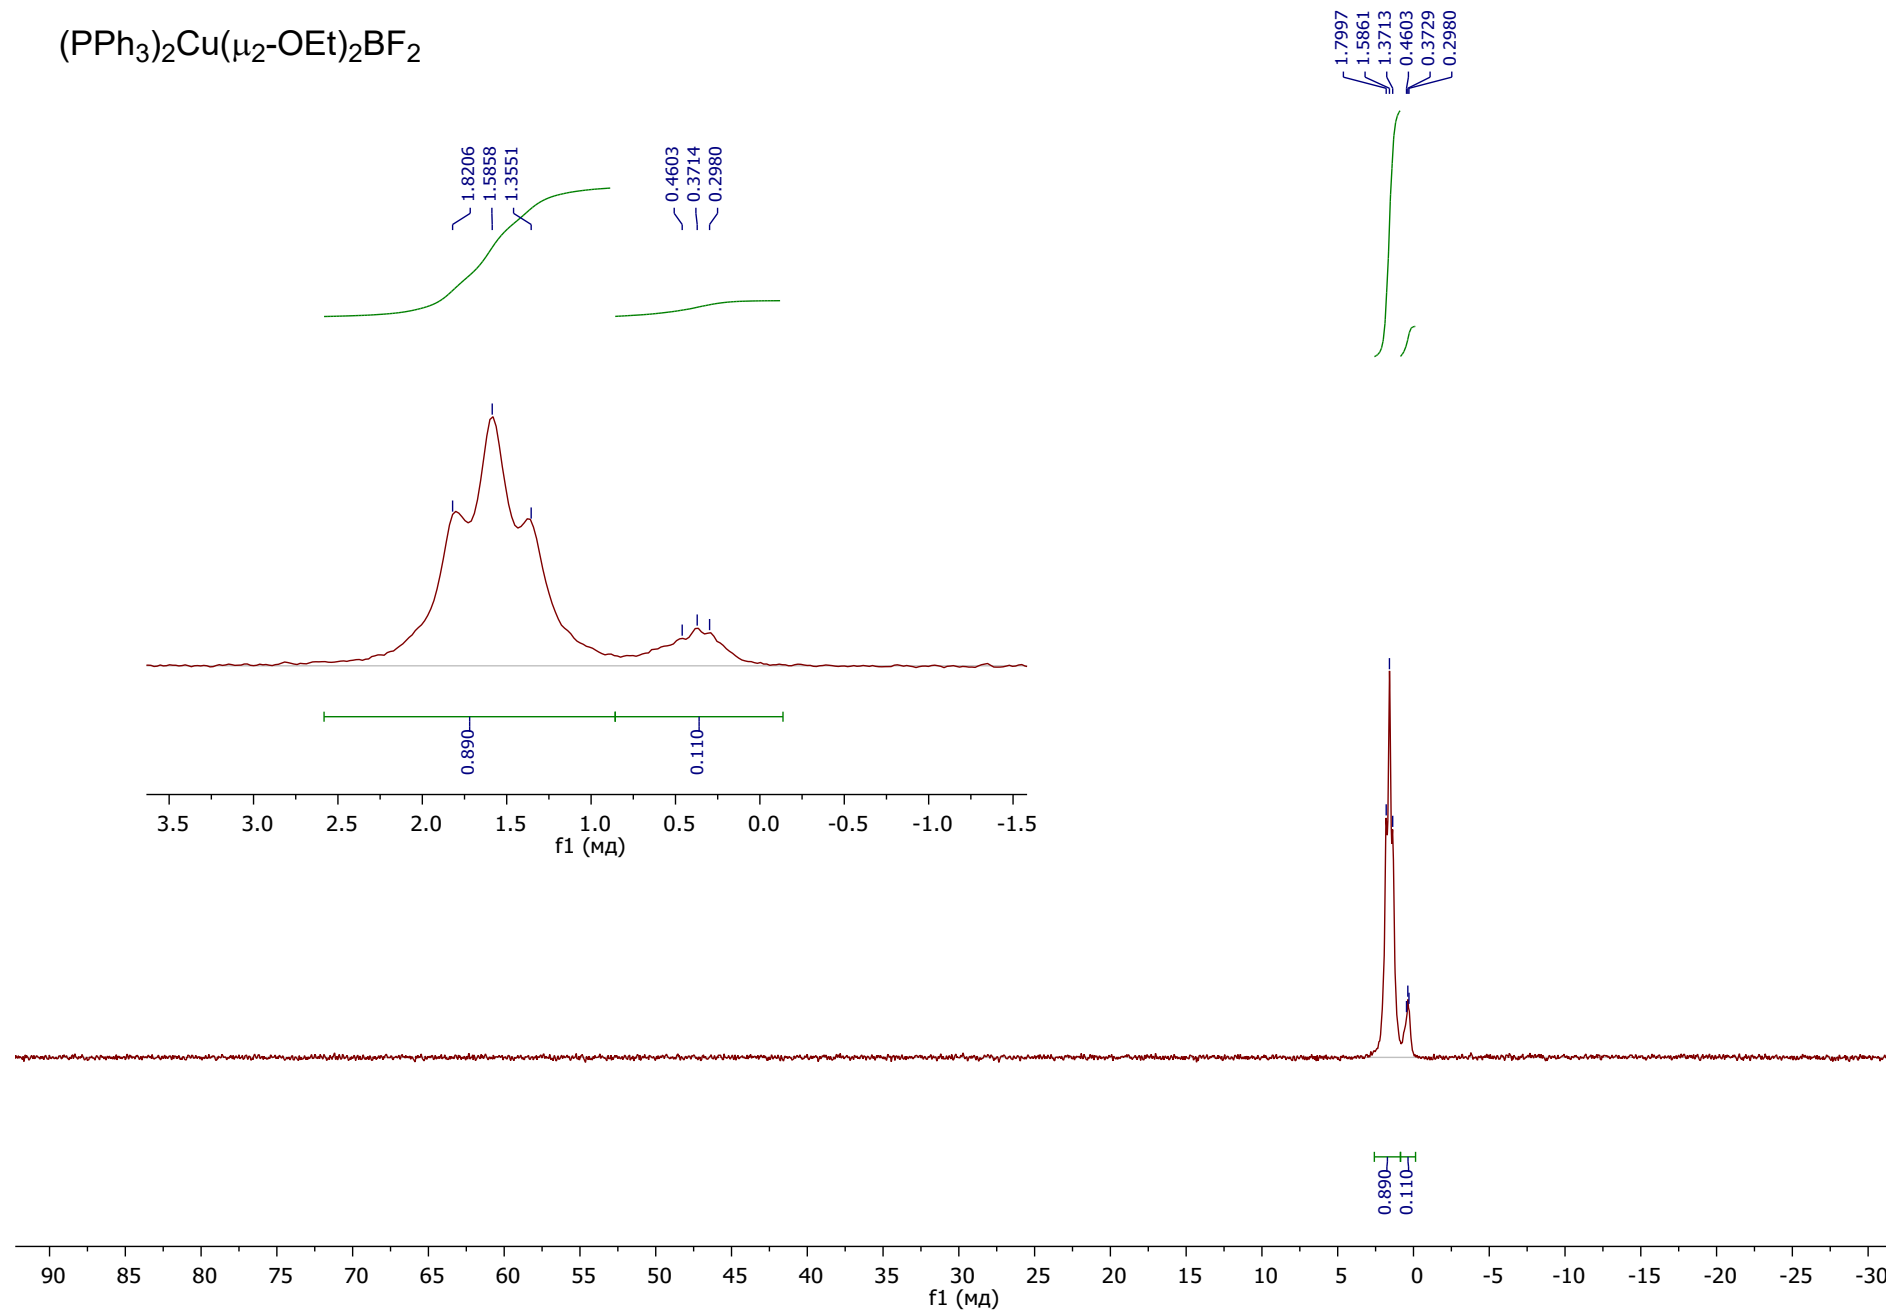

$^{19}\text{F}$  NMR ( $\text{CDCl}_3$ , 282 MHz) [Cu-2]

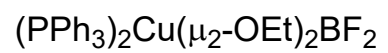

— -151.9637  
— -156.0647

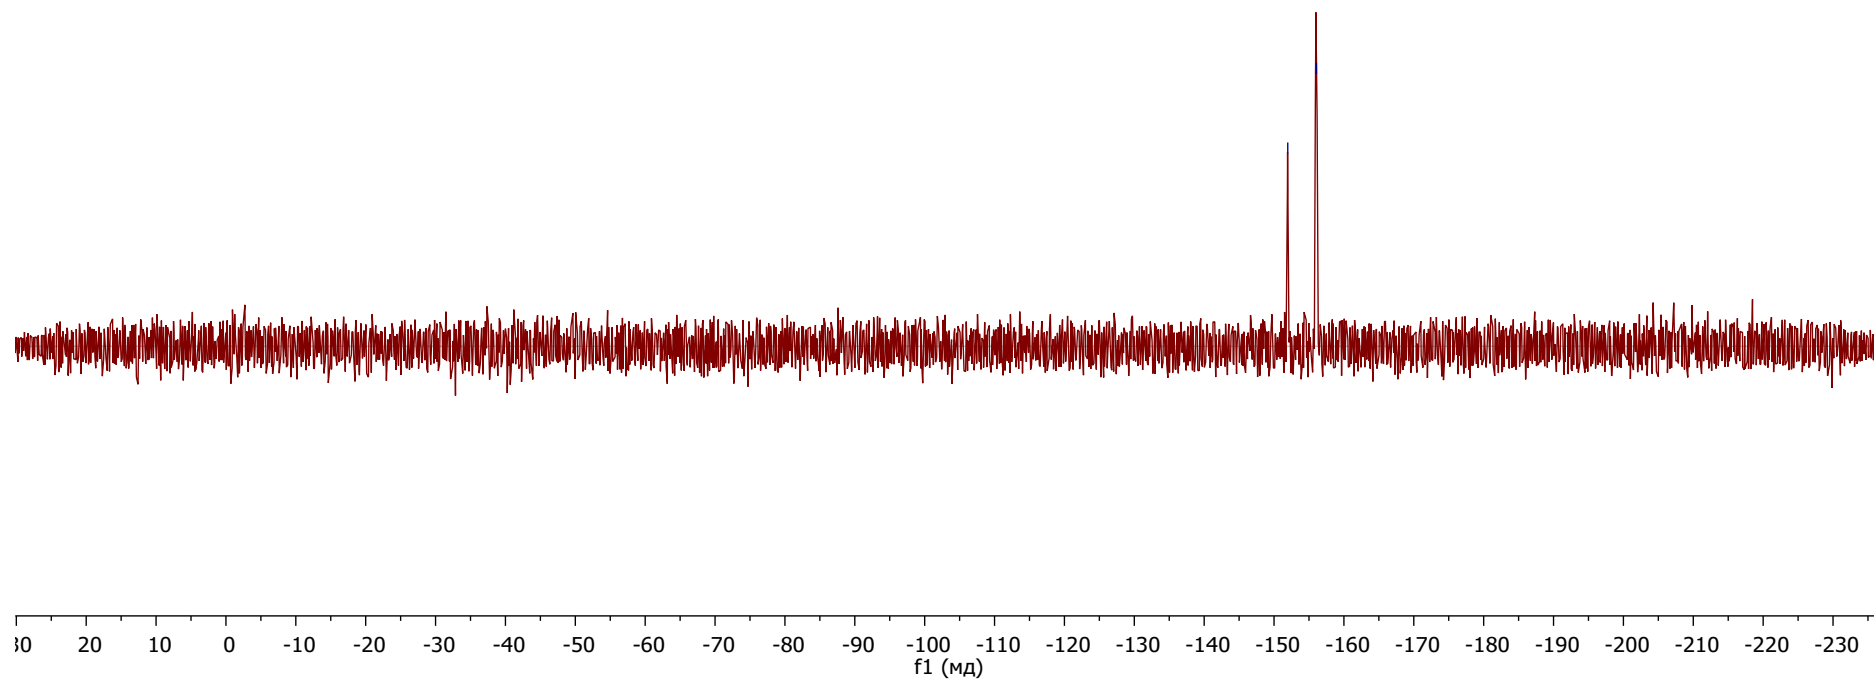



$^1\text{H}$  NMR ( $\text{CDCl}_3$ , 400 MHz) [Cu-3]

$\text{Cu}(\text{PPh}_3)_3\text{Cl}\cdot\text{MeCN}$

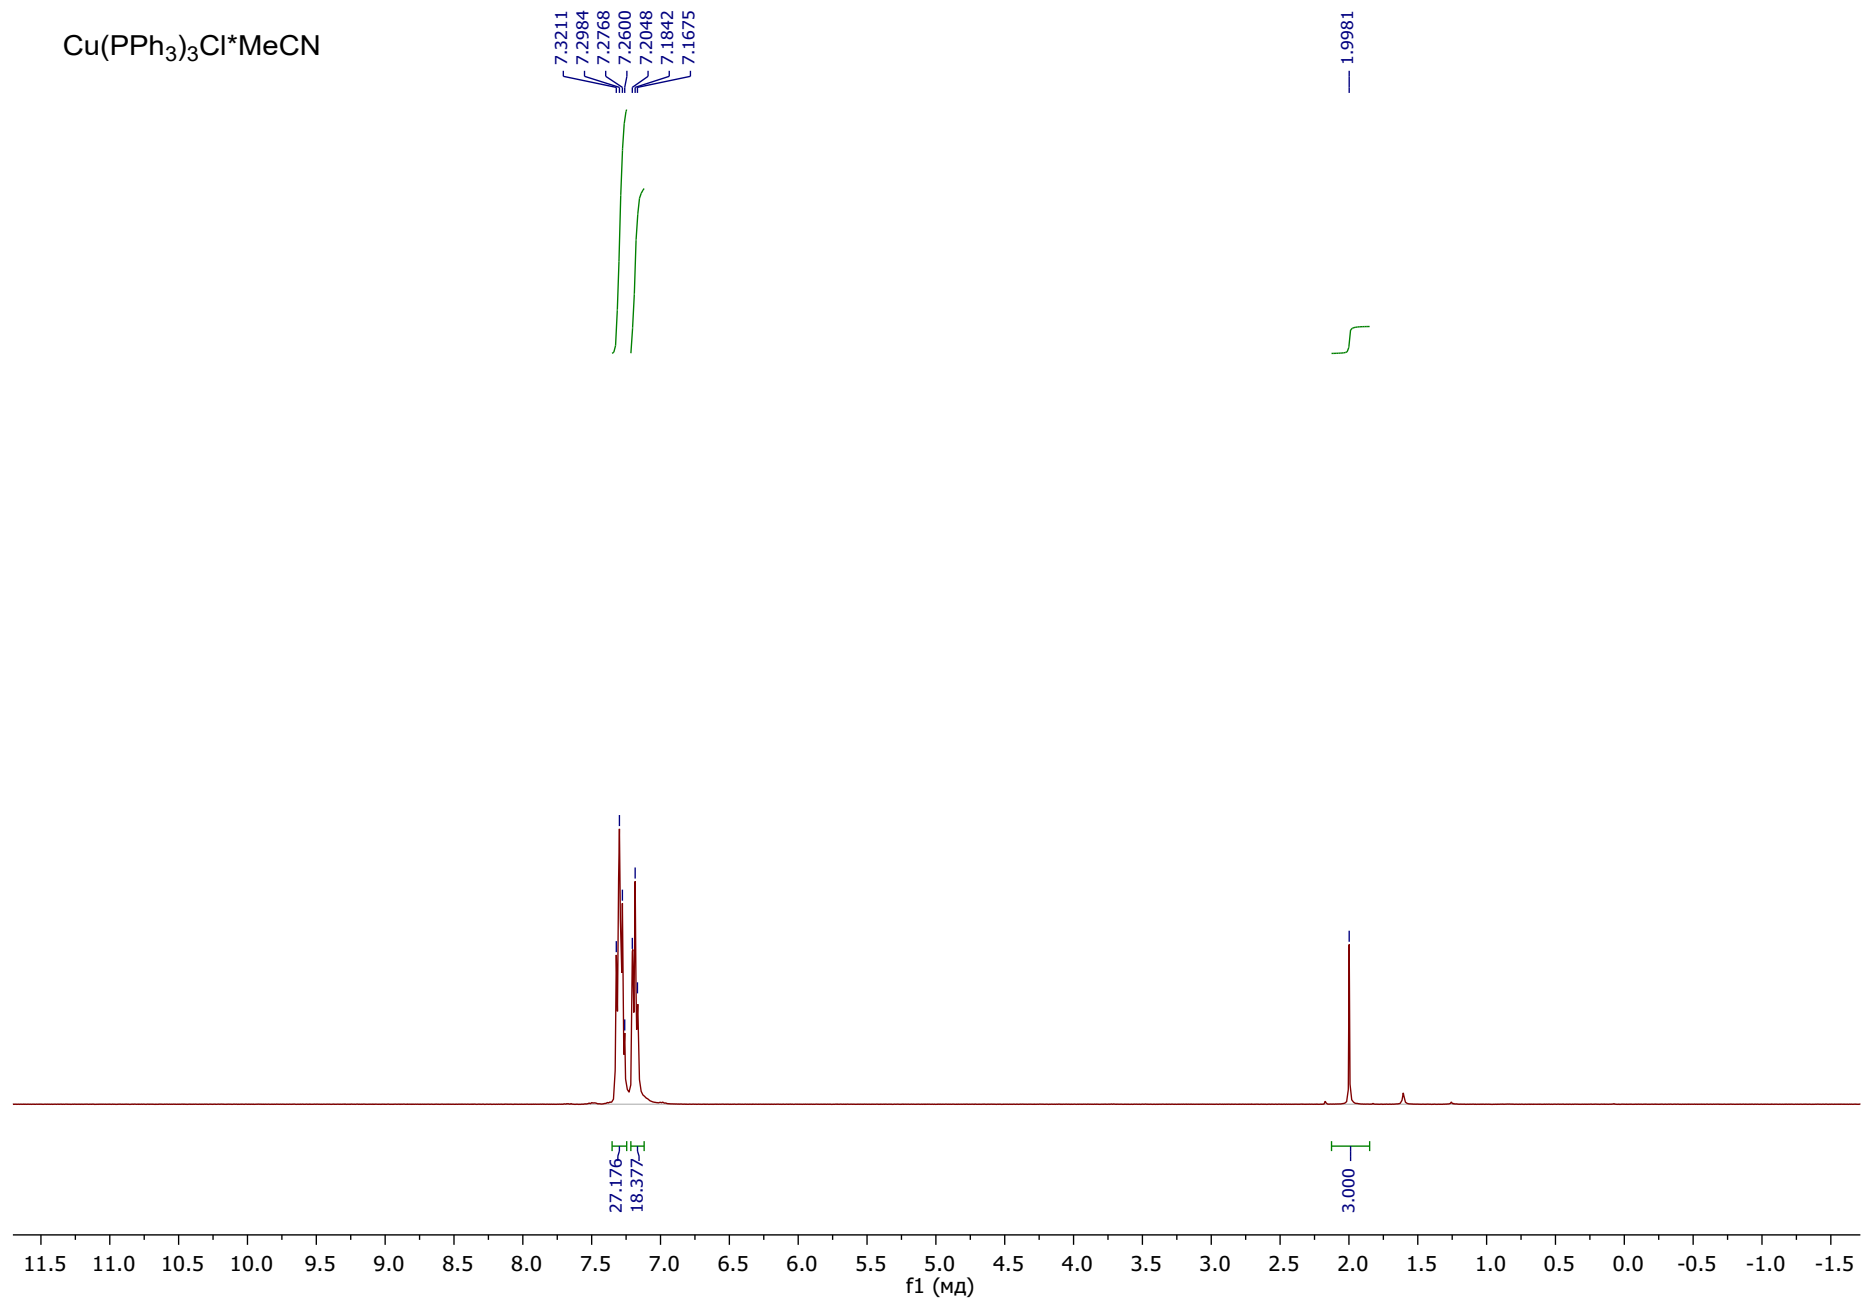

$^{31}\text{P}$  NMR ( $\text{CDCl}_3$ , 121 MHz) [Cu-3]

$\text{Cu}(\text{PPh}_3)_3\text{Cl}\cdot\text{MeCN}$

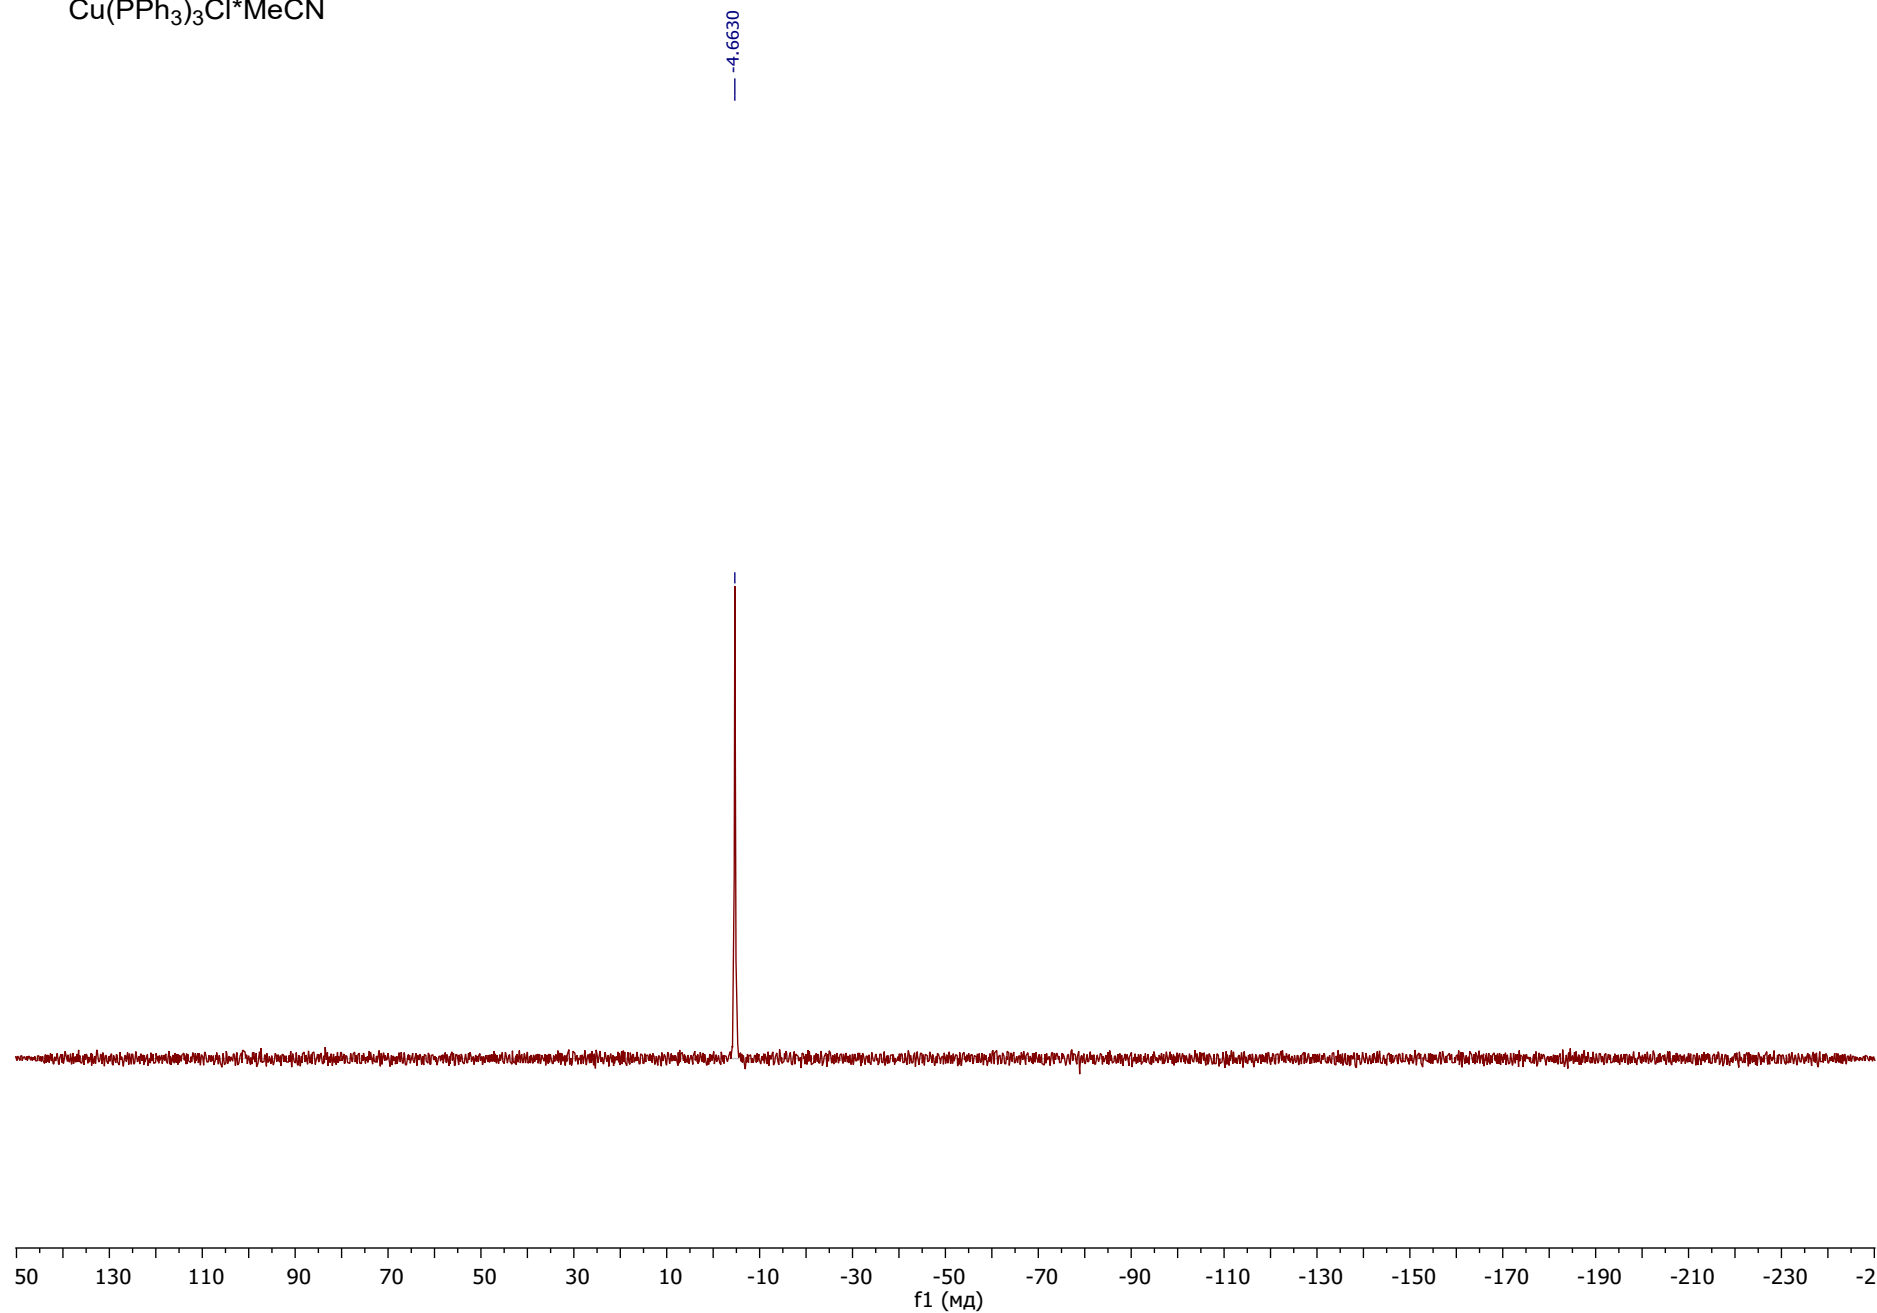

<sup>1</sup>H NMR (CDCl<sub>3</sub>, 400 MHz) [Cu-4]

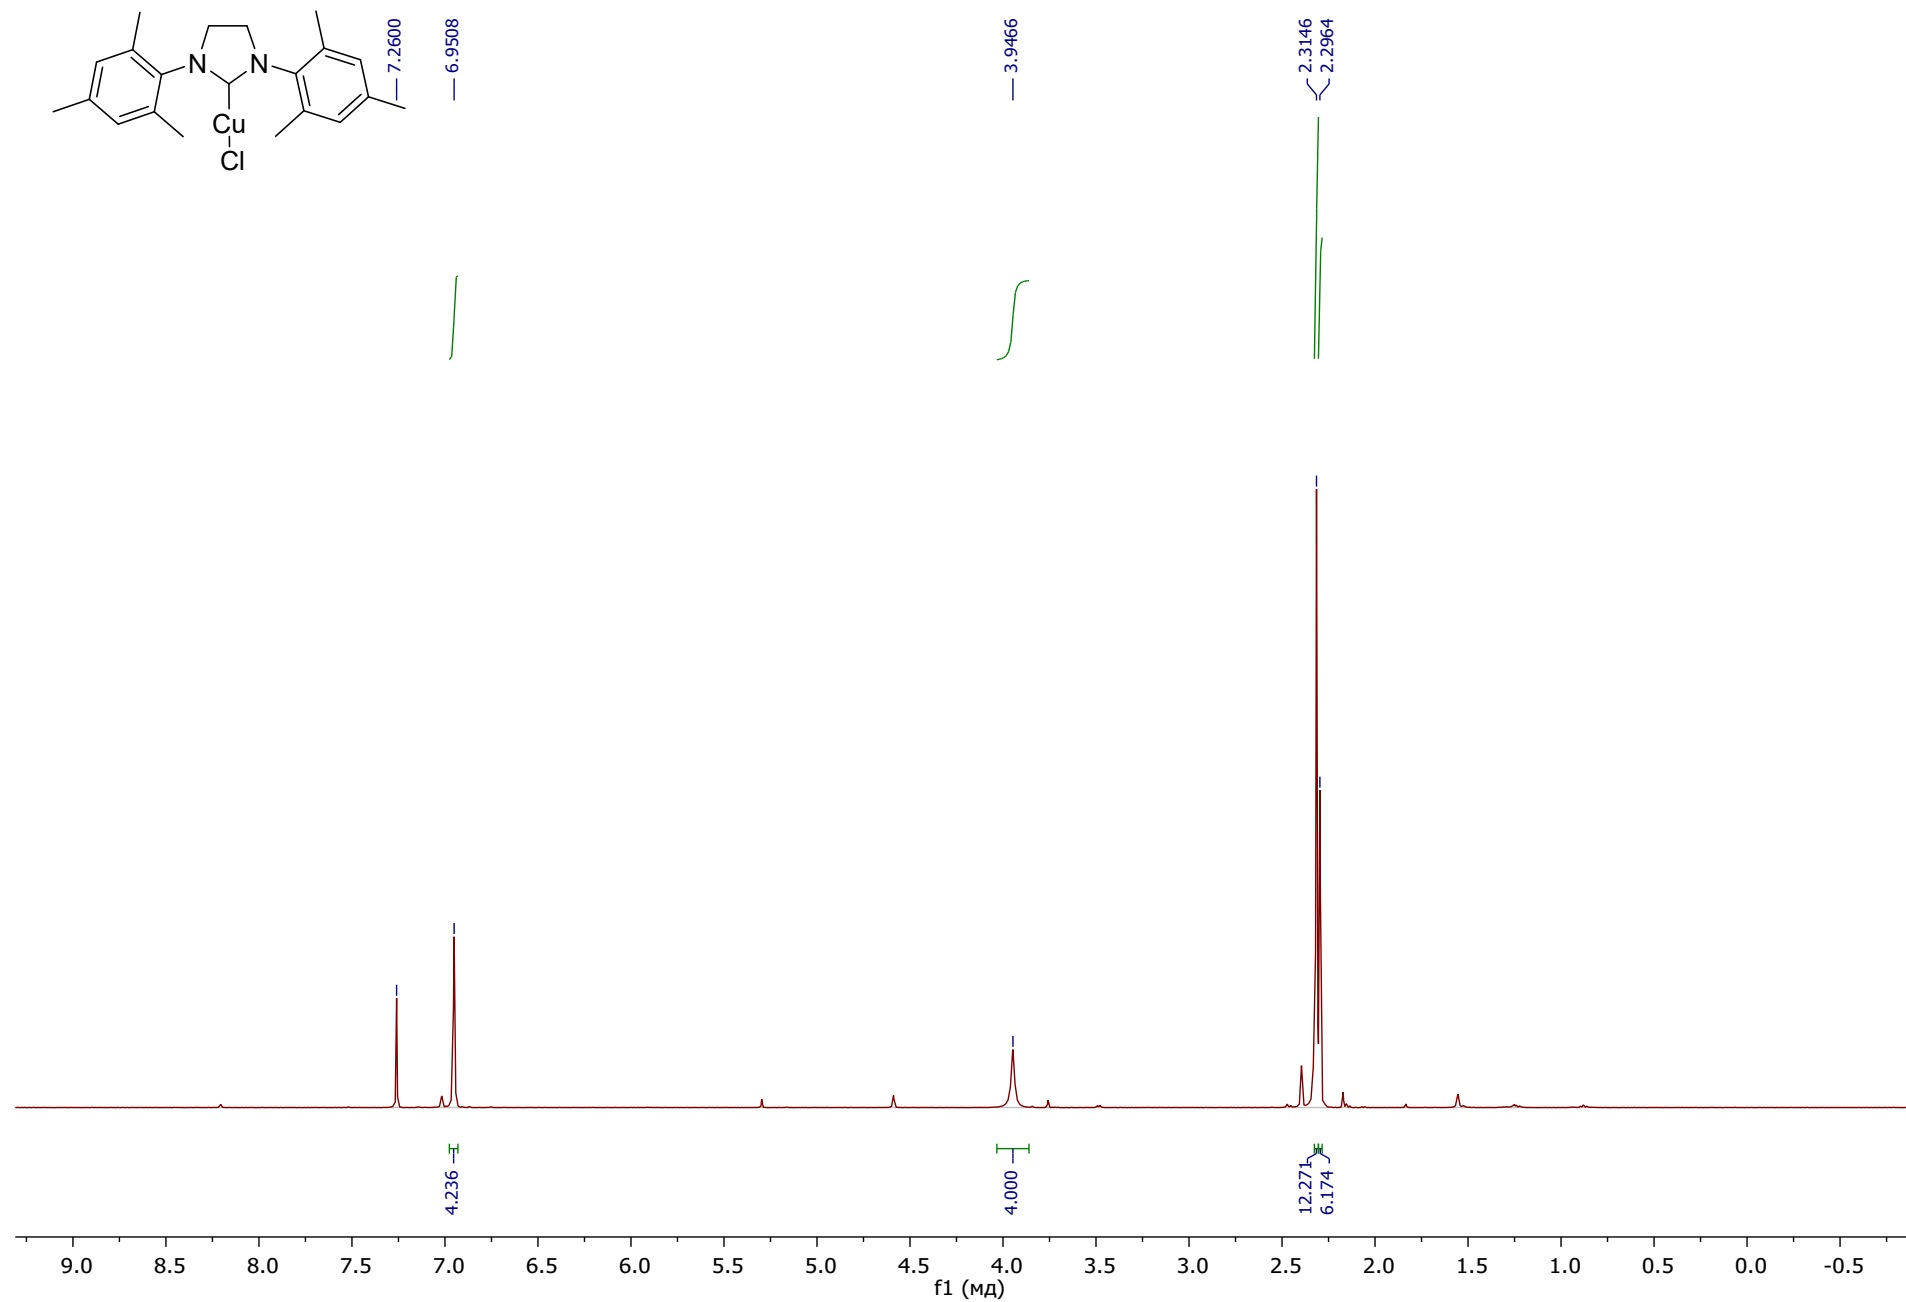

$^1\text{H}$  NMR ( $\text{CDCl}_3$ , 400 MHz) [Cu-5]

$\text{Cu}(\text{dppe})_2\text{BF}_4$

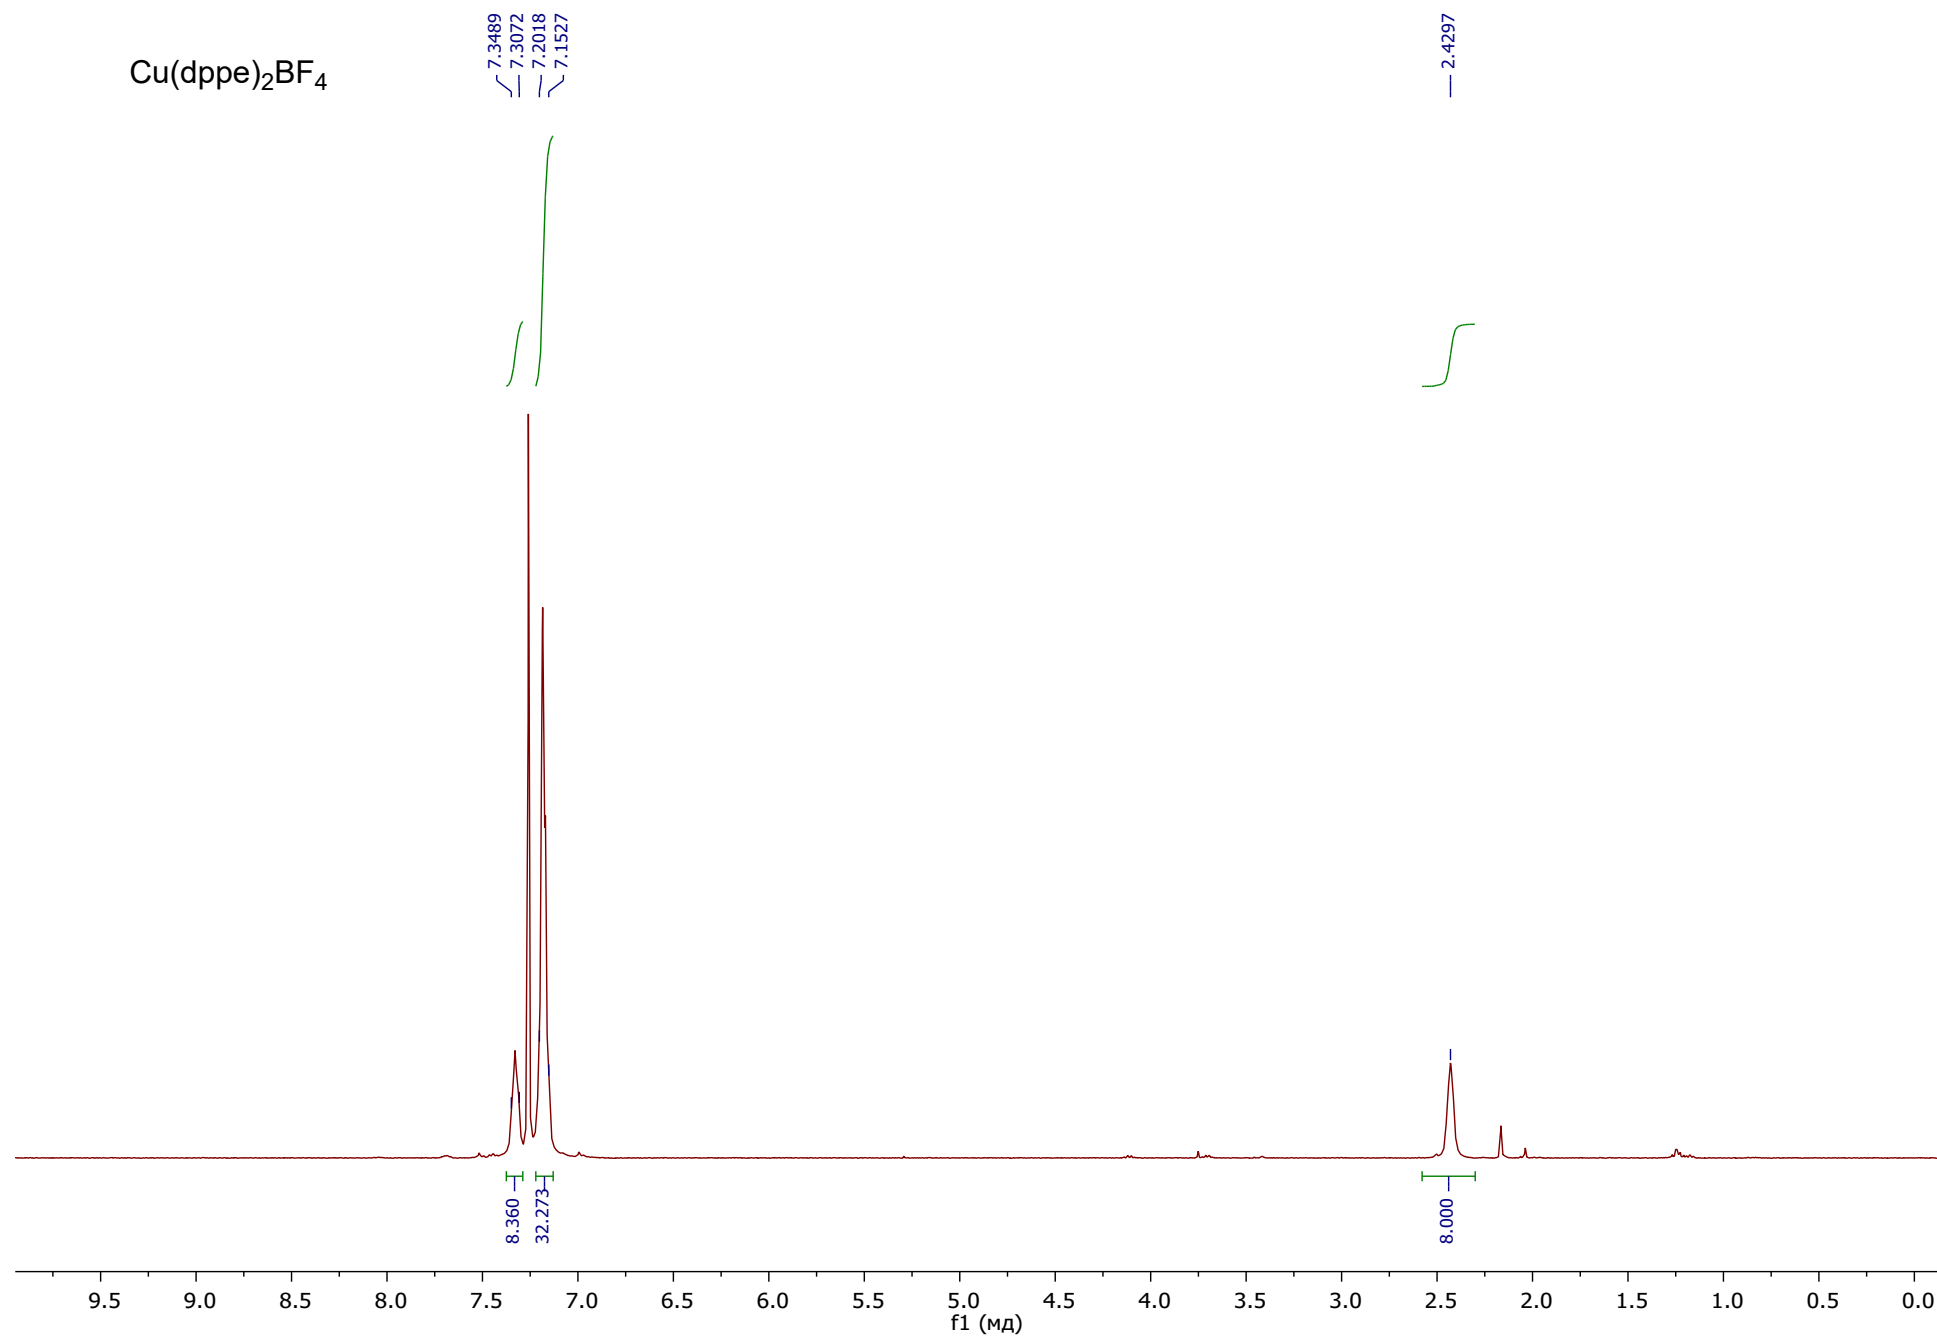

$^{31}\text{P}$  NMR ( $\text{CDCl}_3$ , 121 MHz) [Cu-5]

$\text{Cu}(\text{dppe})_2\text{BF}_4$

— 7.0555

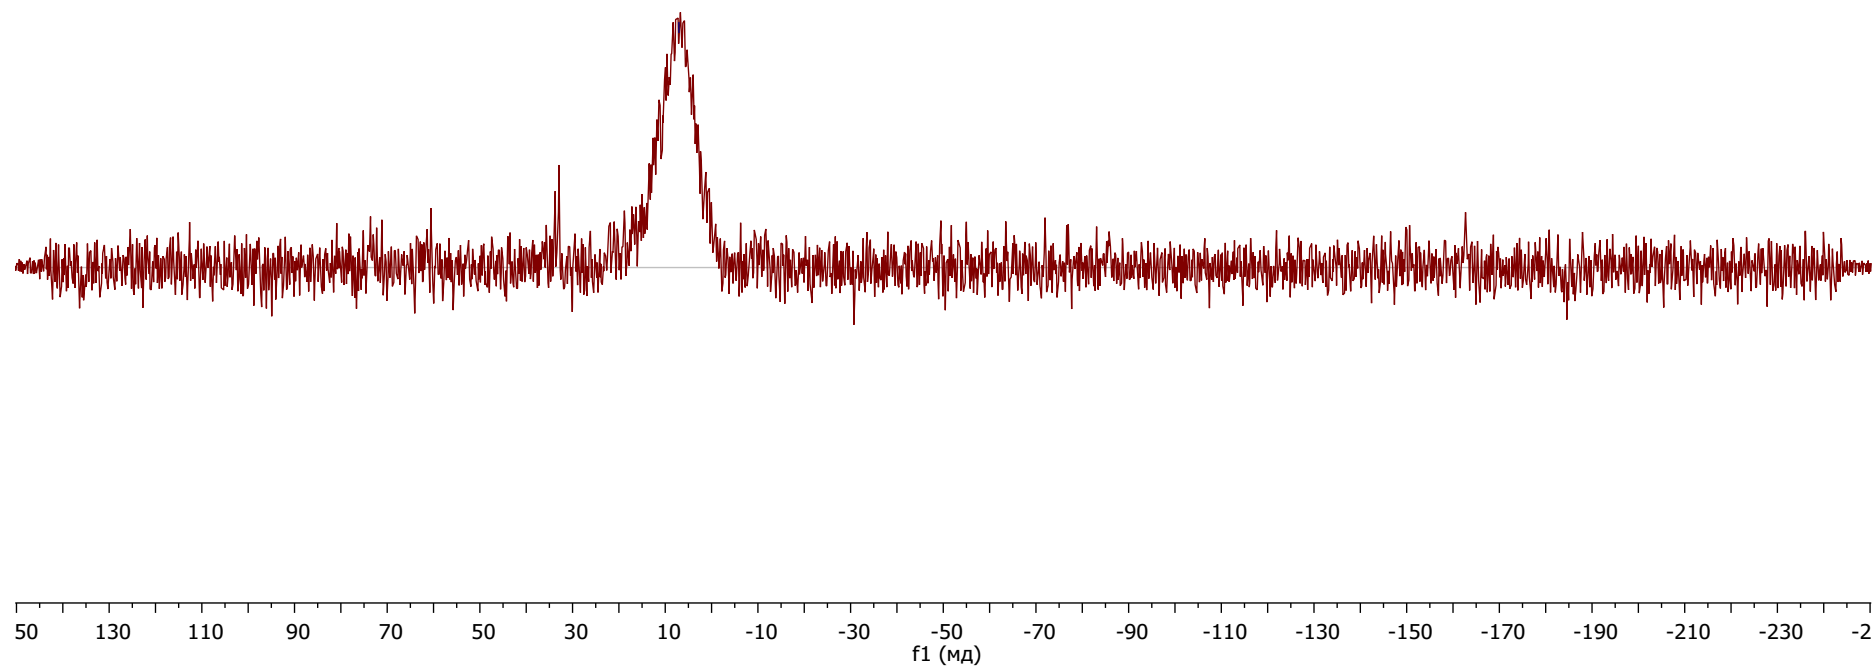

$^1\text{H}$  NMR ( $\text{CDCl}_3$ , 400 MHz) [Cu-6]

[Cu(dppf)Cl] $_2$

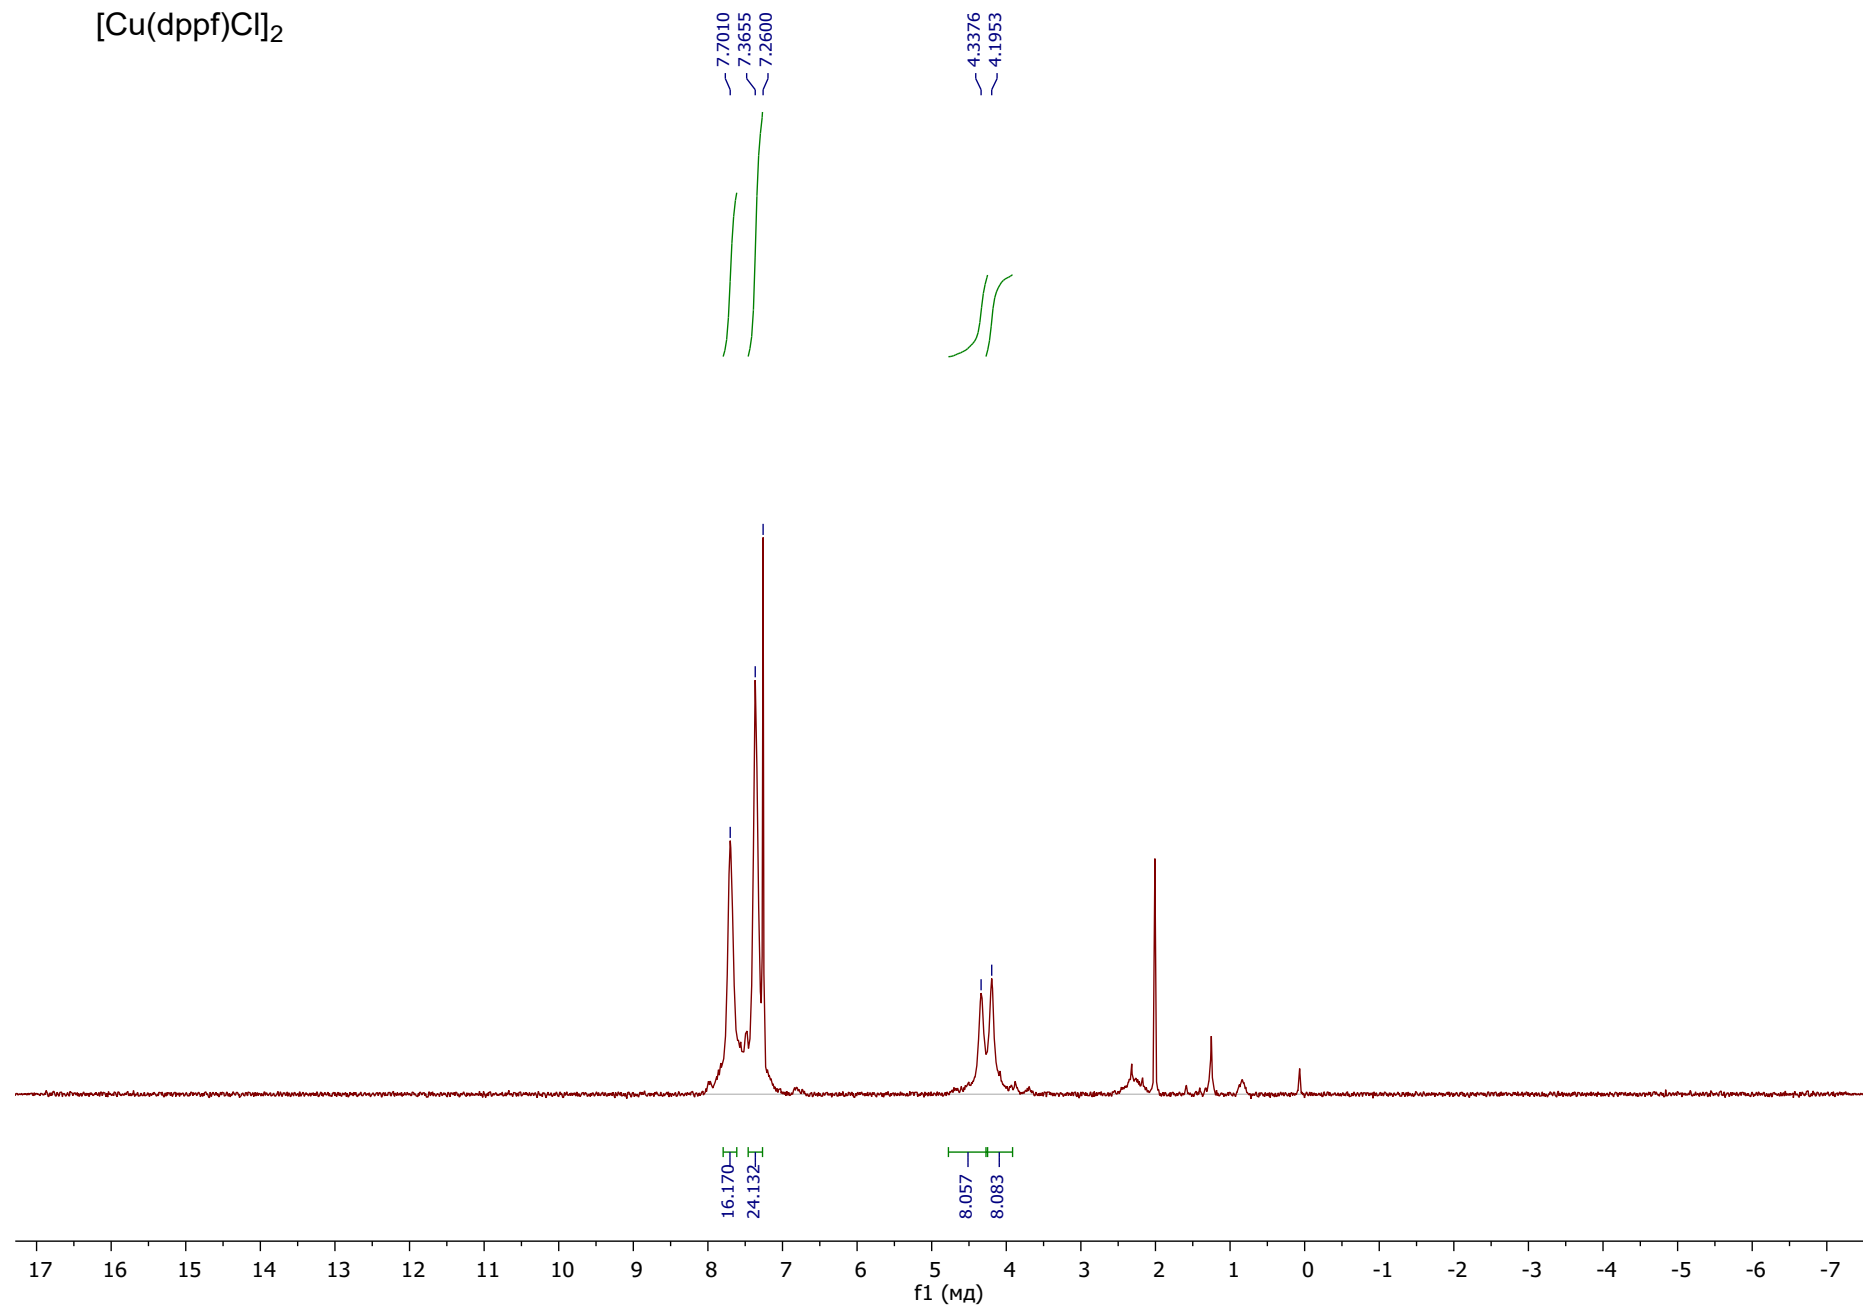

$^{31}\text{P}$  NMR ( $\text{CDCl}_3$ , 121 MHz) [Cu-6]

[Cu(dppf)Cl] $_2$

-19.1029

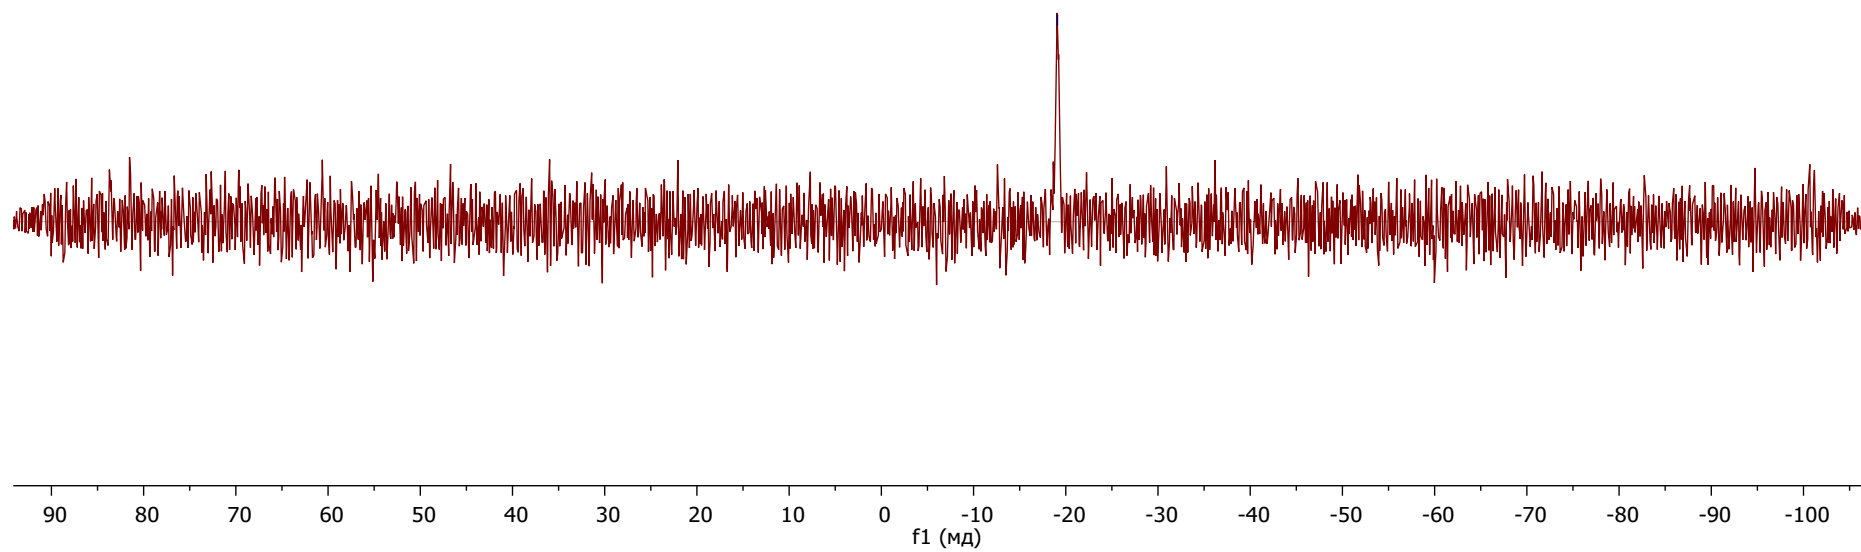

$^1\text{H}$  NMR ( $\text{CDCl}_3$ , 400 MHz) [Cu-7]

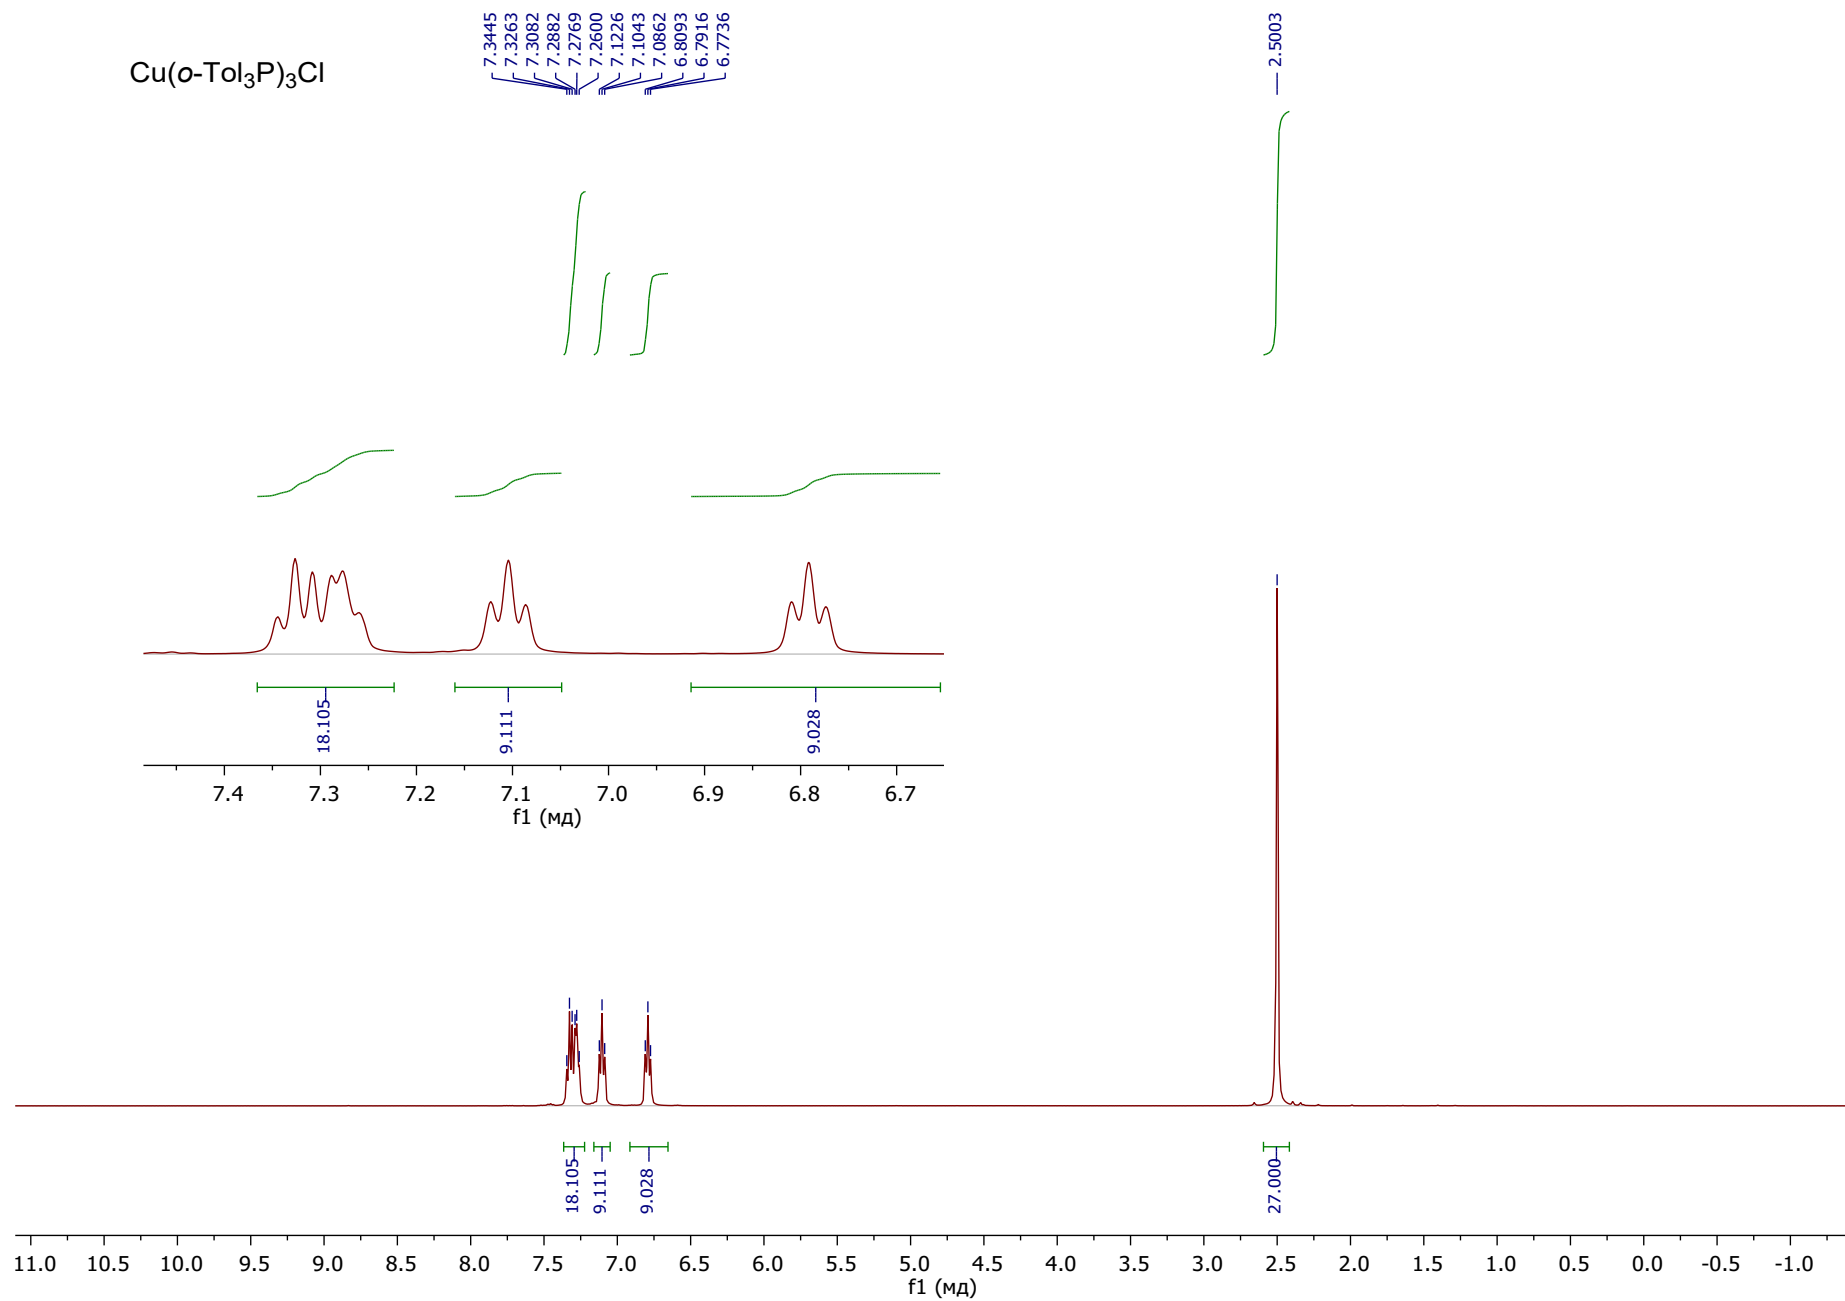



$^{13}\text{C}$  NMR ( $\text{CDCl}_3$ , 101 MHz) [Cu-7]

$\text{Cu}(\text{o-Tol}_3\text{P})_3\text{Cl}$

143.0460  
142.8313  
133.1658  
133.1371  
131.2483  
130.8381  
130.7790  
129.7070  
126.4226  
126.3868

22.1224  
21.9405

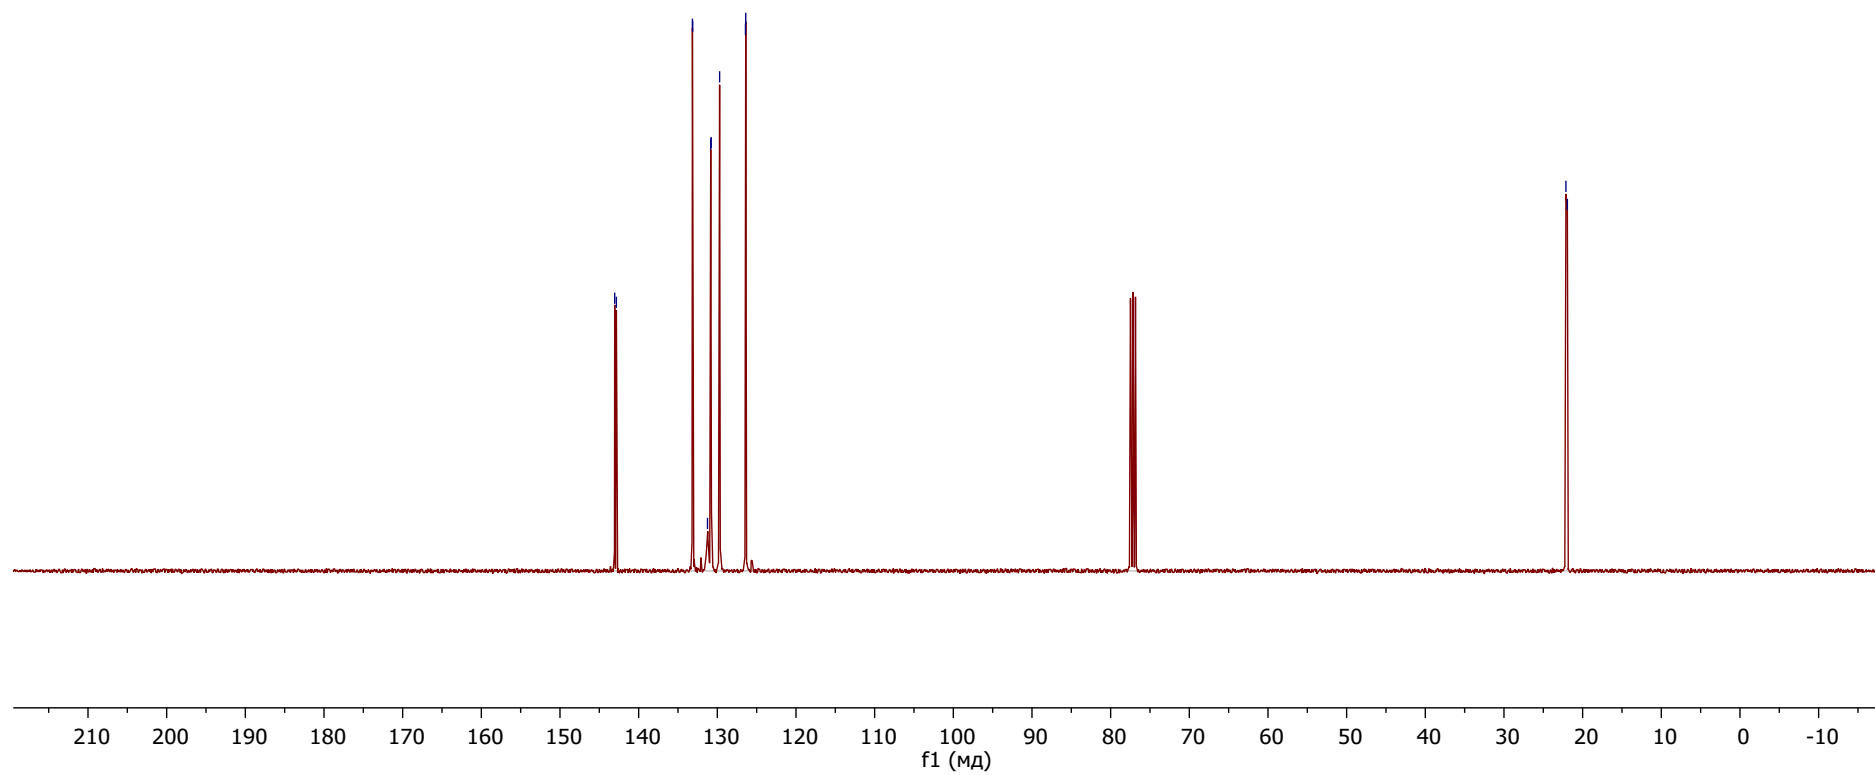

$^{31}\text{P}$  NMR ( $\text{CDCl}_3$ , 162 MHz) [Cu-7]

$\text{Cu}(\text{o-Tol}_3\text{P})_3\text{Cl}$

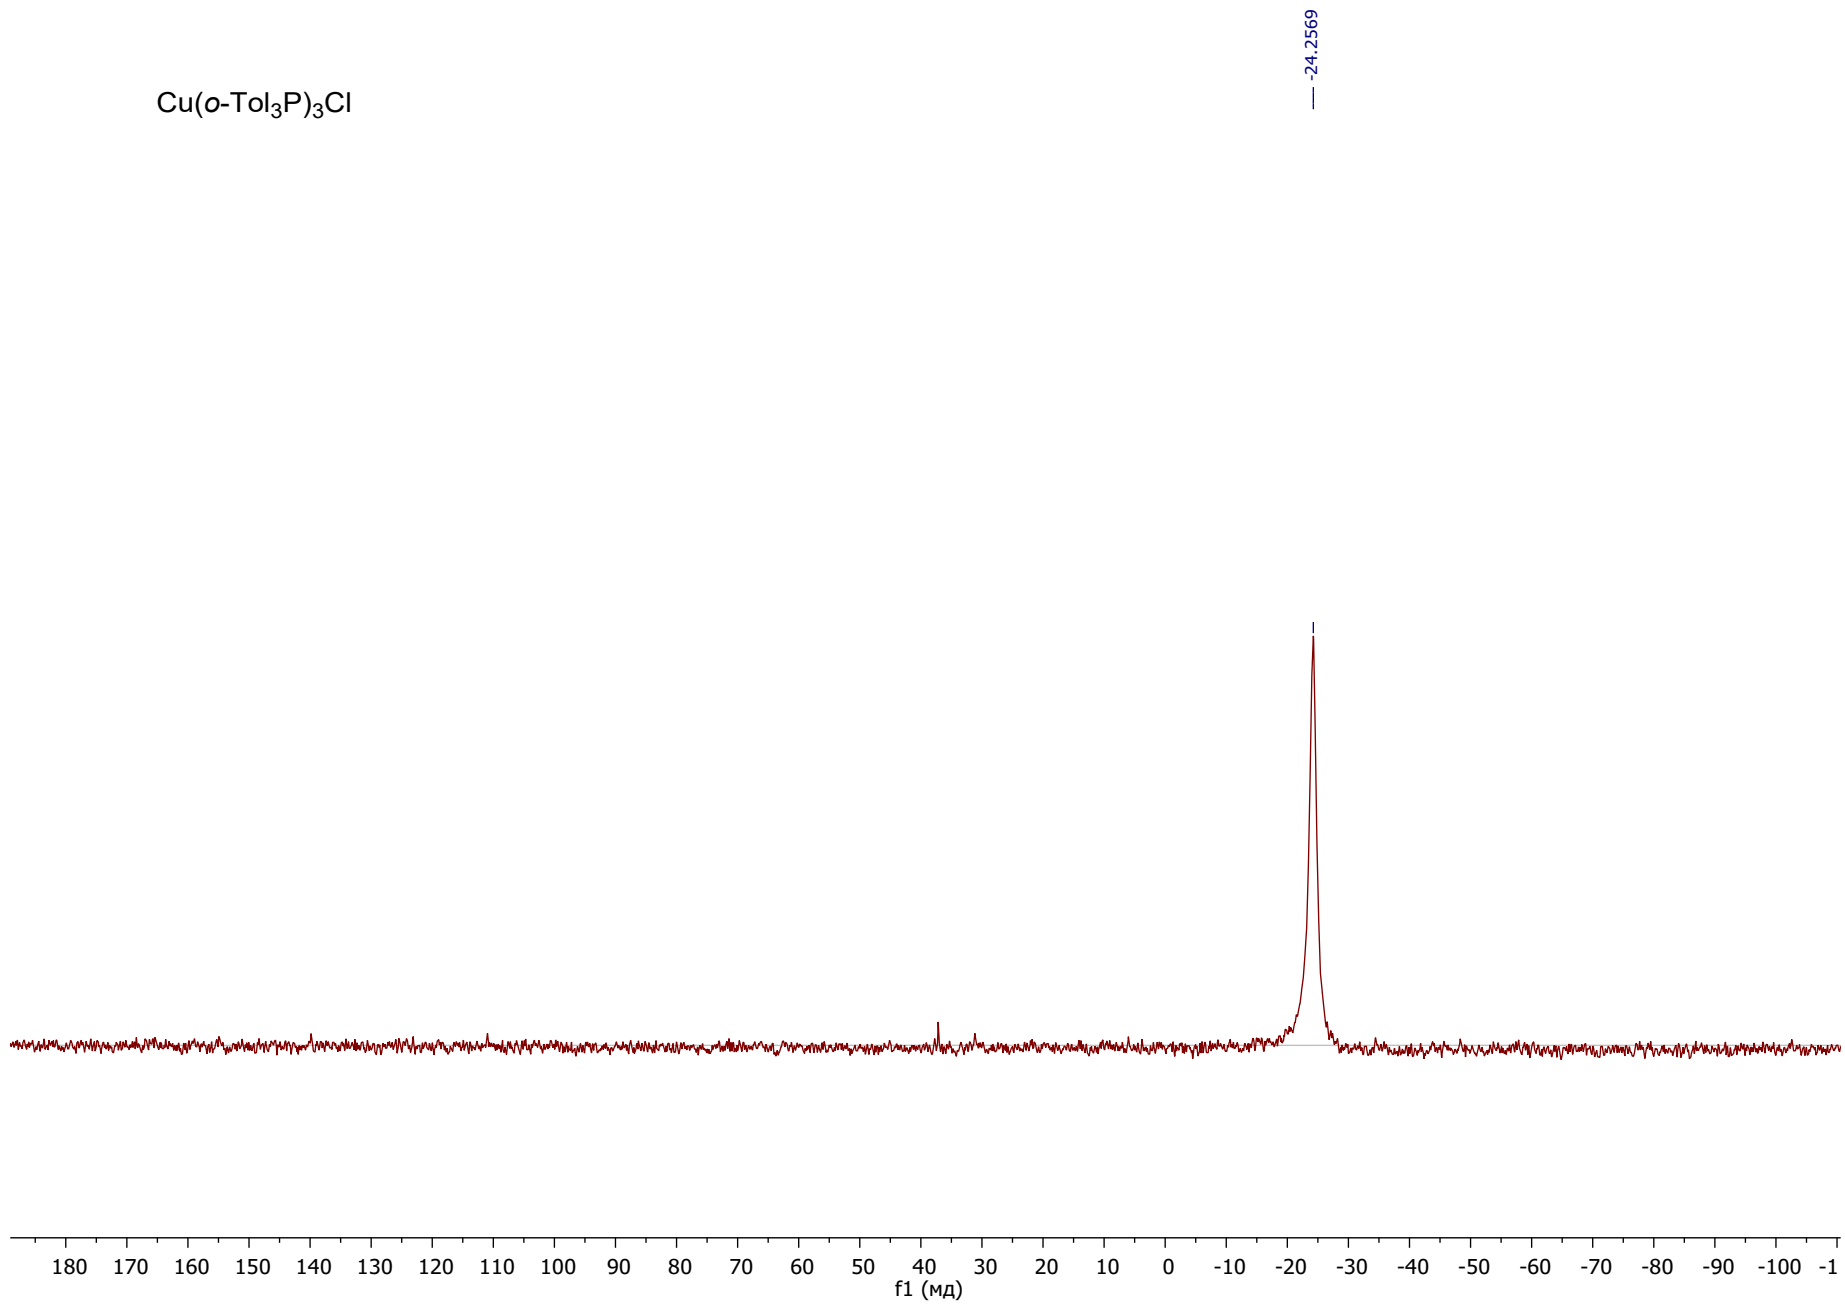

$^1\text{H}$  NMR ( $\text{CDCl}_3$ , 400 MHz) [Cu-8]

$\text{Cu}(\text{PPh}_2\text{Me})_3\text{Cl}$

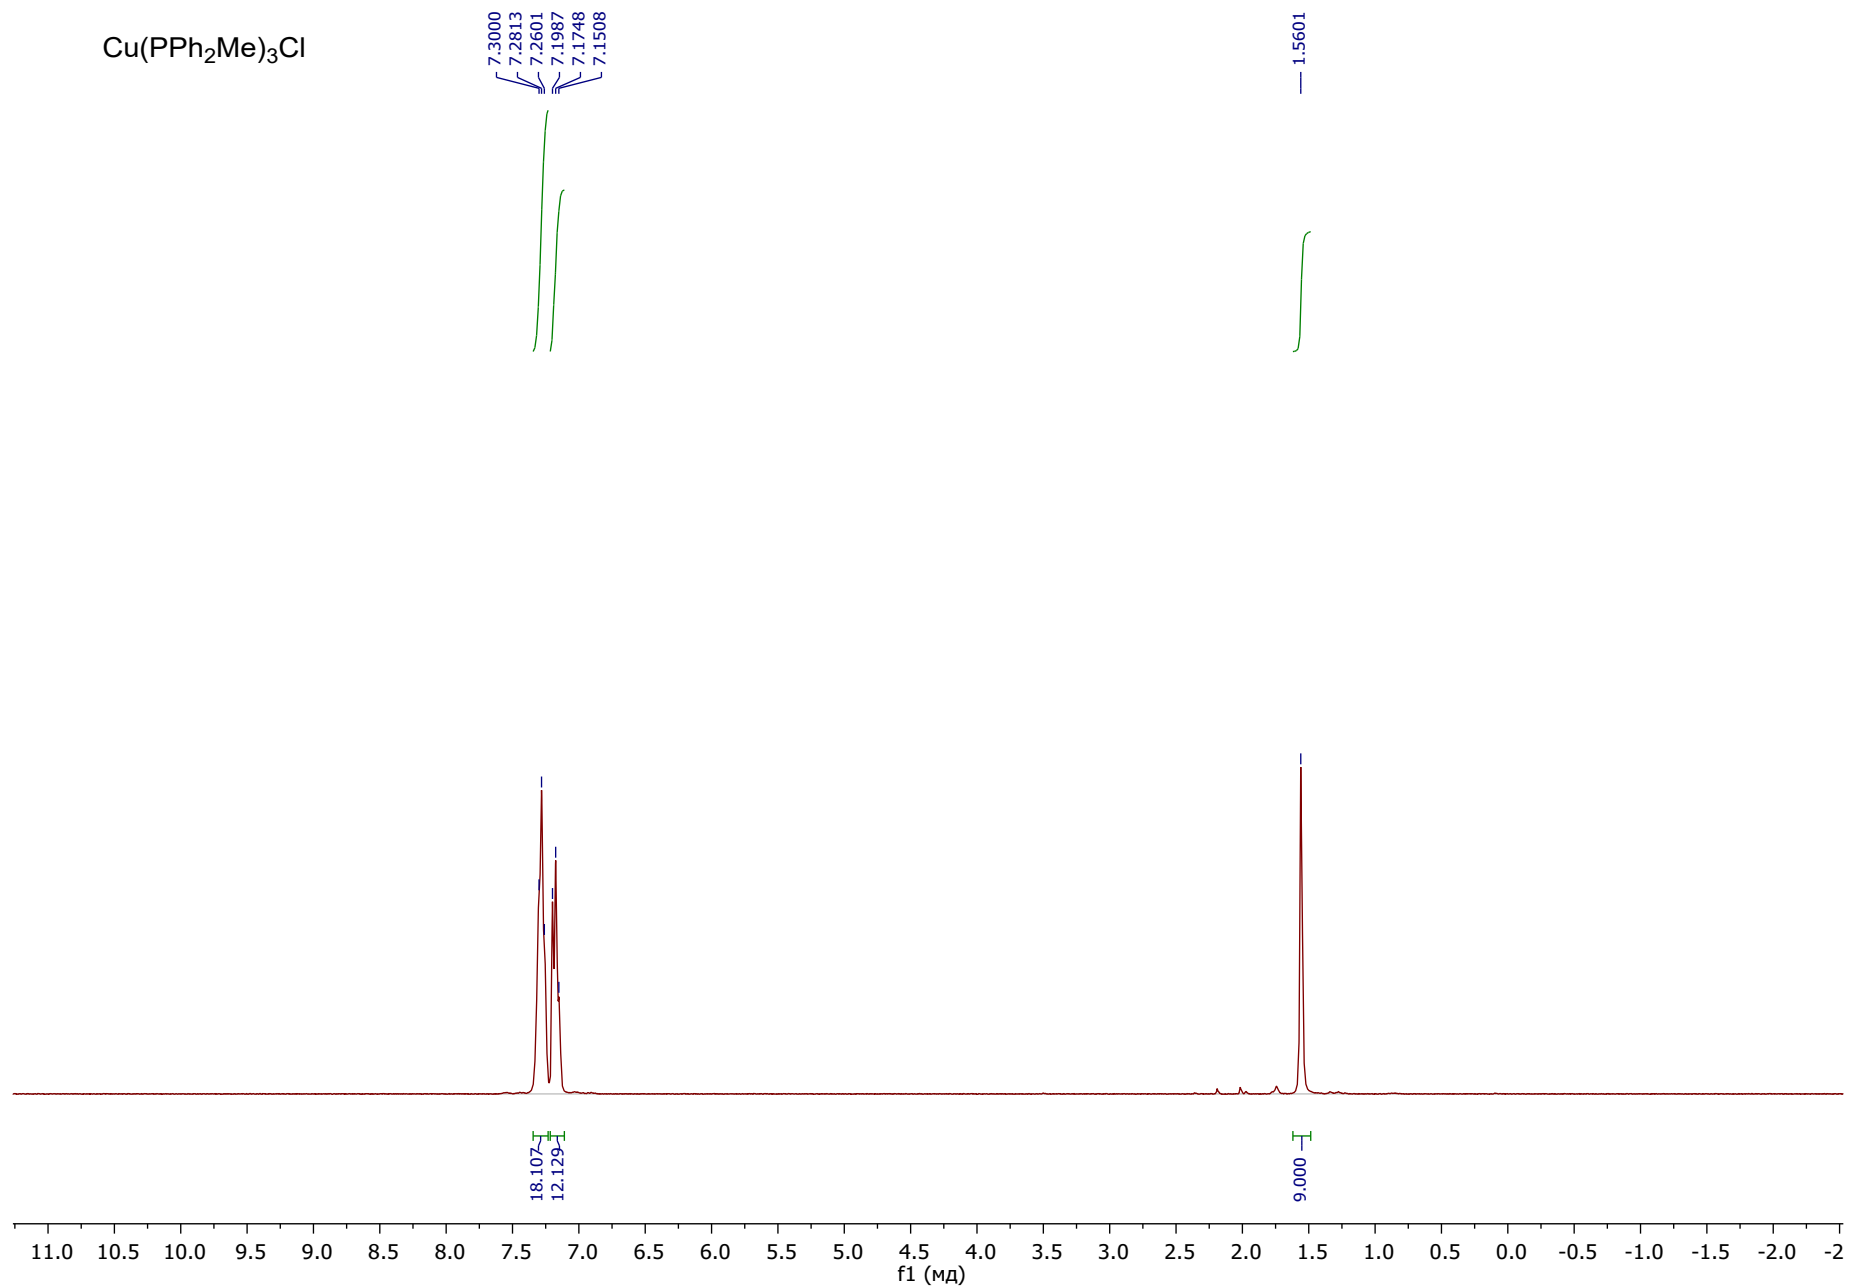

$^{13}\text{C}$  NMR ( $\text{CDCl}_3$ , 101 MHz) [Cu-8]

$\text{Cu}(\text{PPh}_2\text{Me})_3\text{Cl}$

136.7849  
136.5749  
132.2765  
132.1558  
129.0077  
128.3484  
128.3072

13.1134  
12.9920

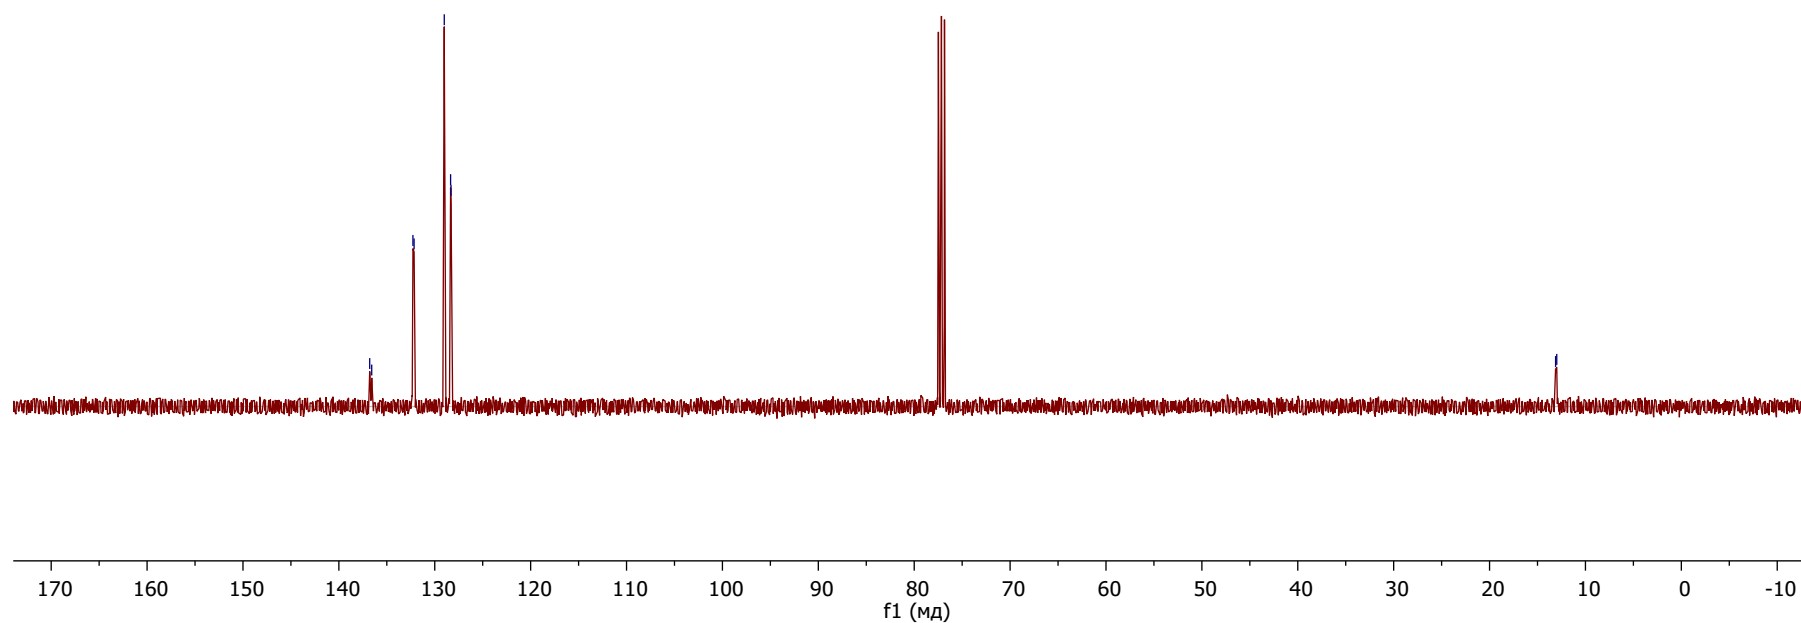

$^{31}\text{P}$  NMR ( $\text{CDCl}_3$ , 121 MHz) [Cu-8]

$\text{Cu}(\text{PPh}_2\text{Me})_3\text{Cl}$

-19.2440

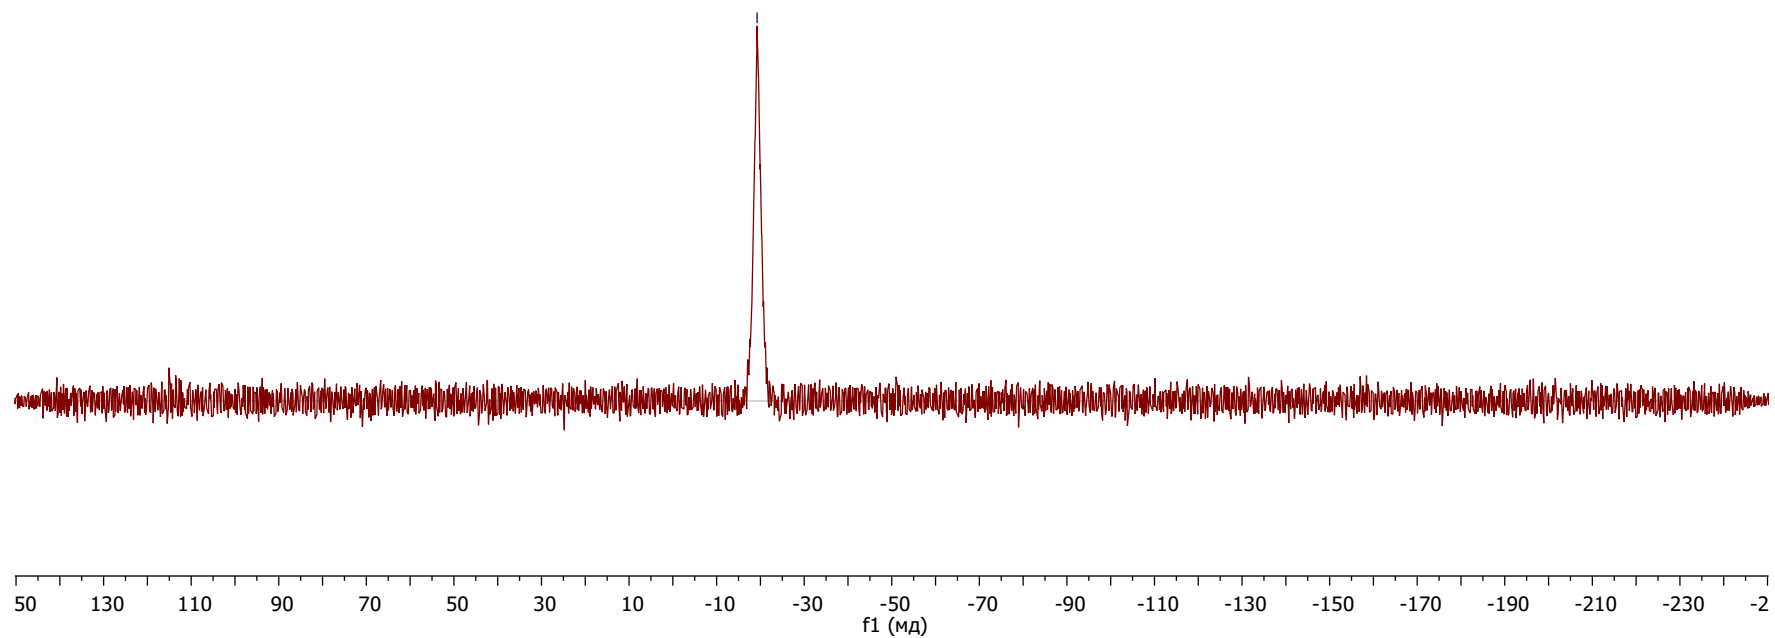

$^1\text{H}$  NMR ( $\text{CDCl}_3$ , 400 MHz) [Cu-9]

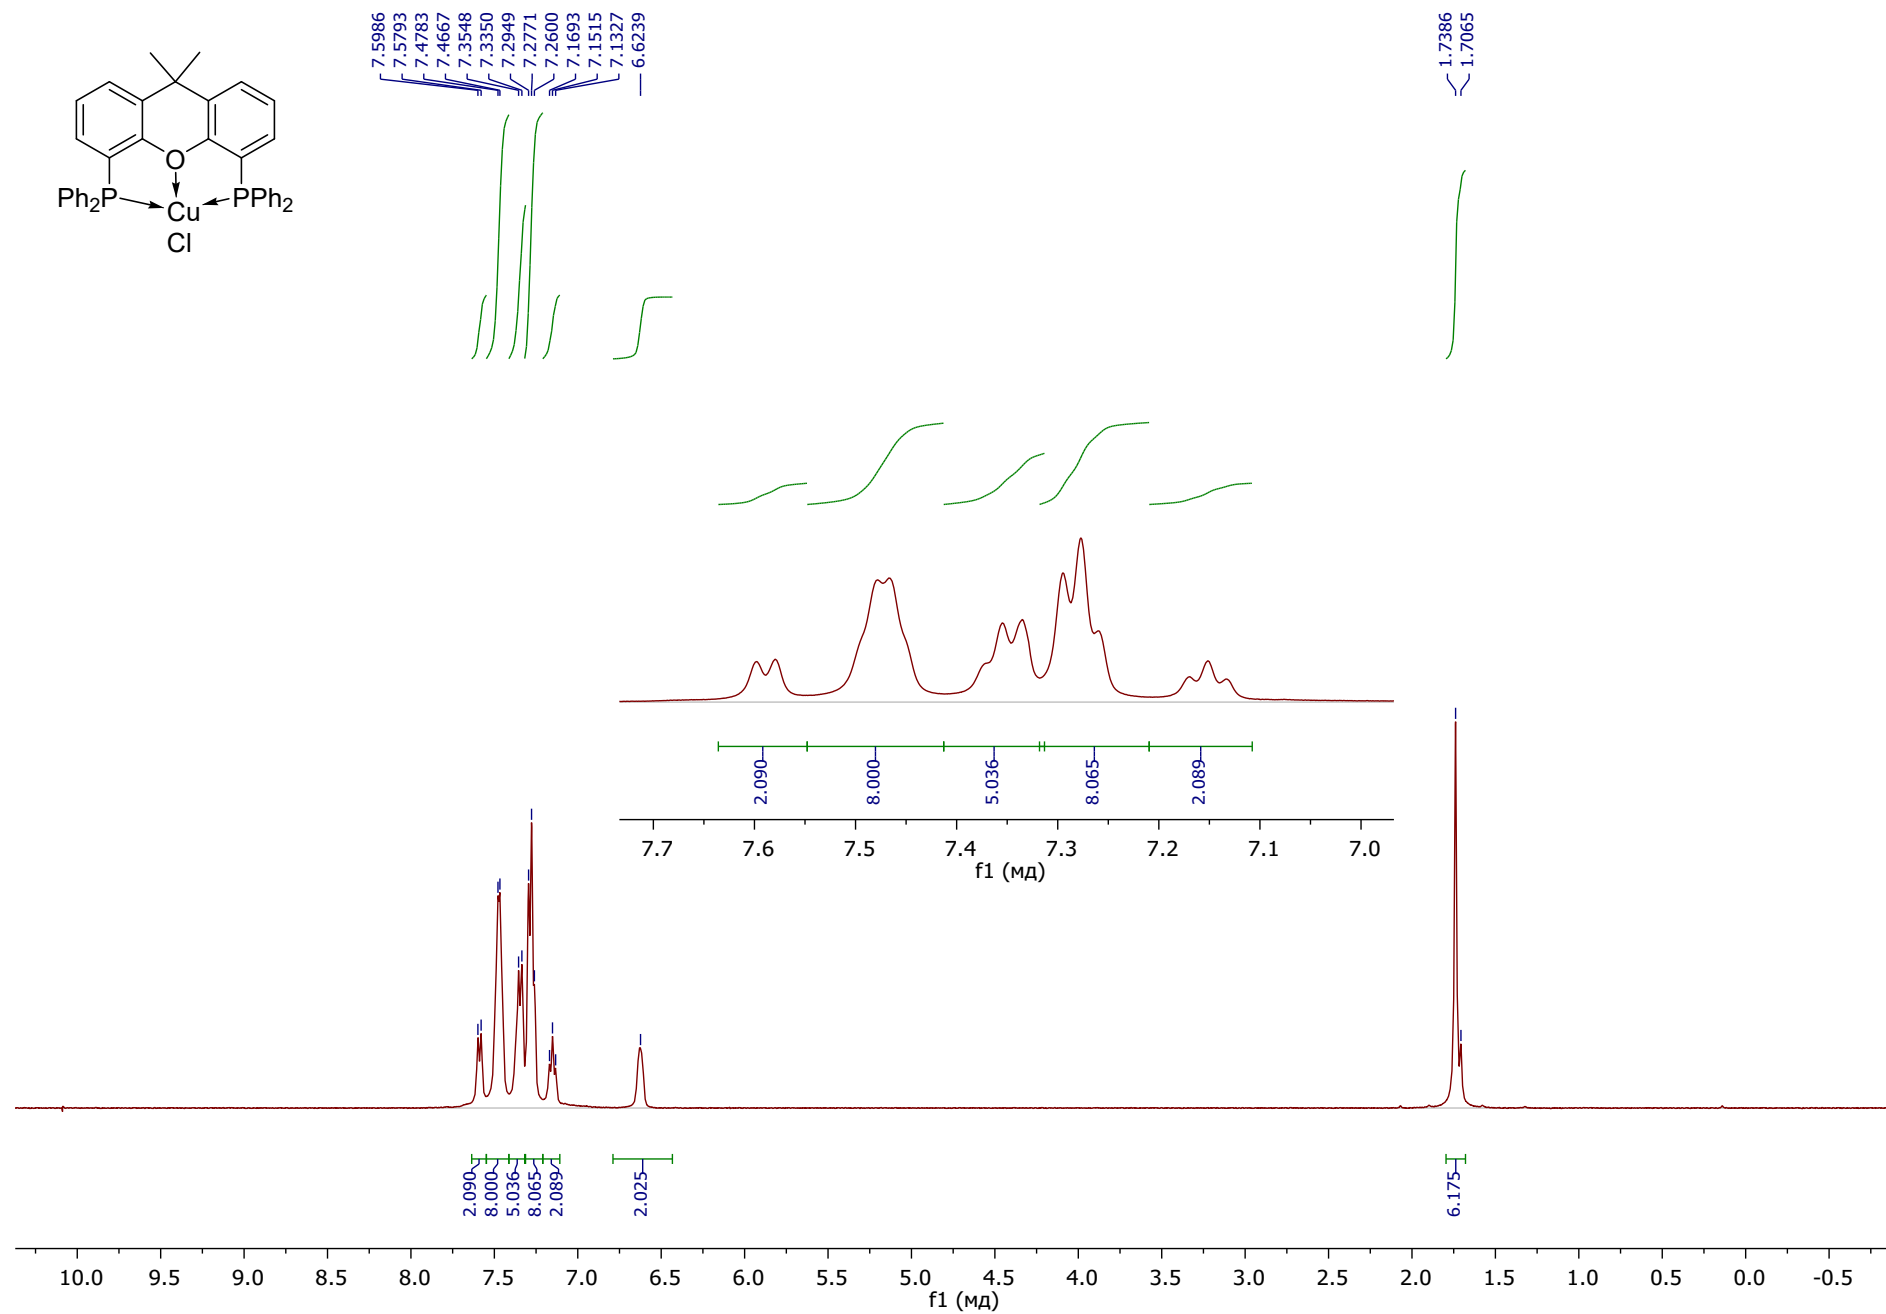

$^{31}\text{P}$  NMR ( $\text{CDCl}_3$ , 162 MHz) [Cu-9]

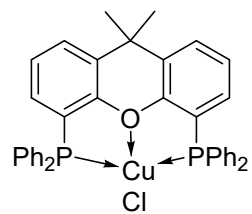

-17.7159

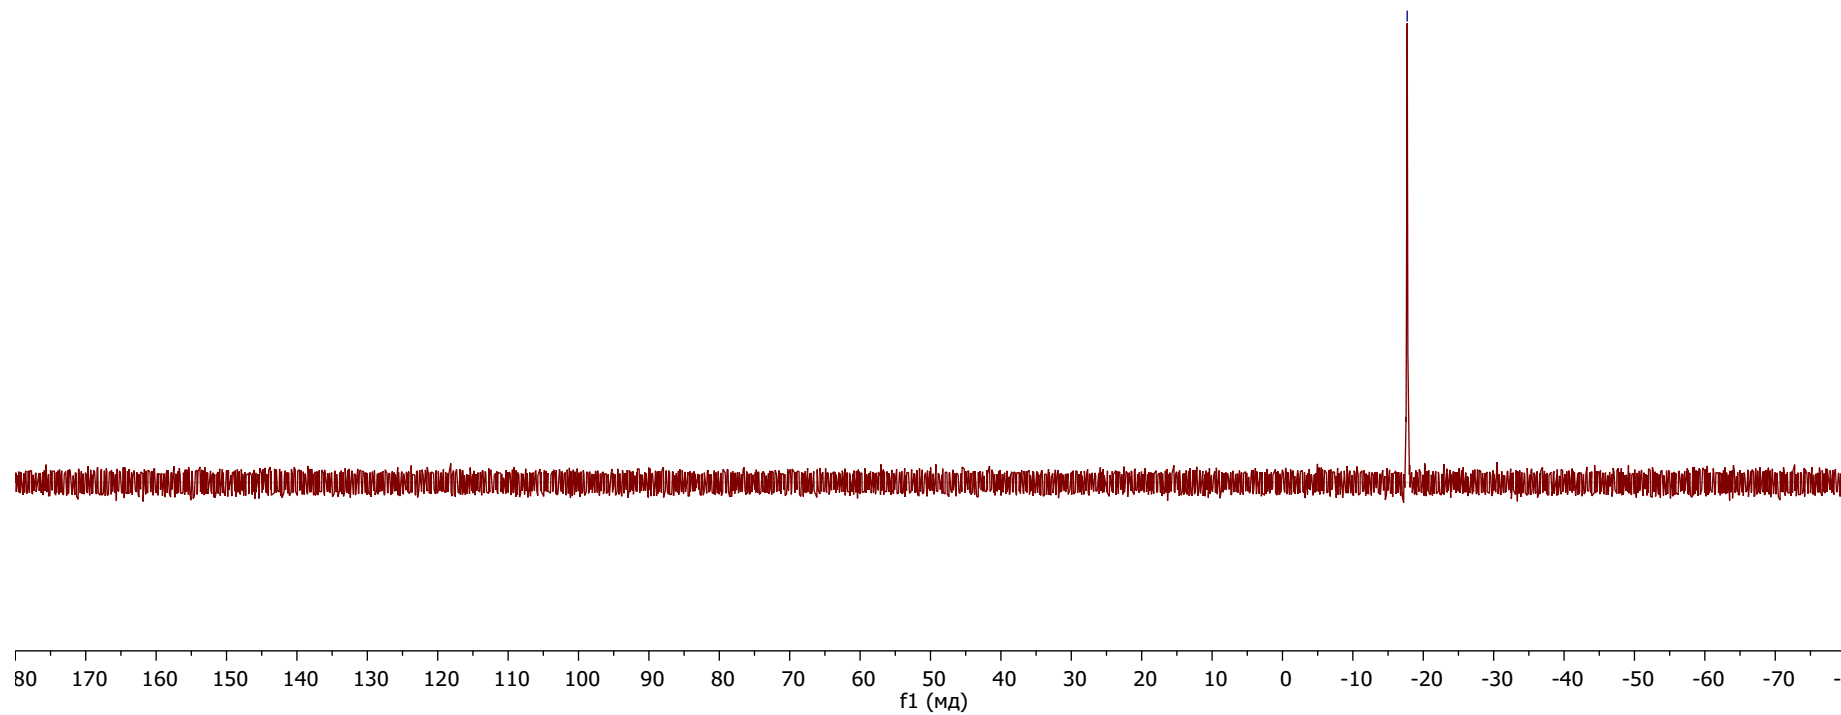

$^1\text{H}$  NMR ( $\text{CDCl}_3$ , 400 MHz) **2a**

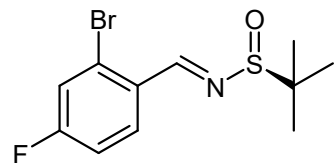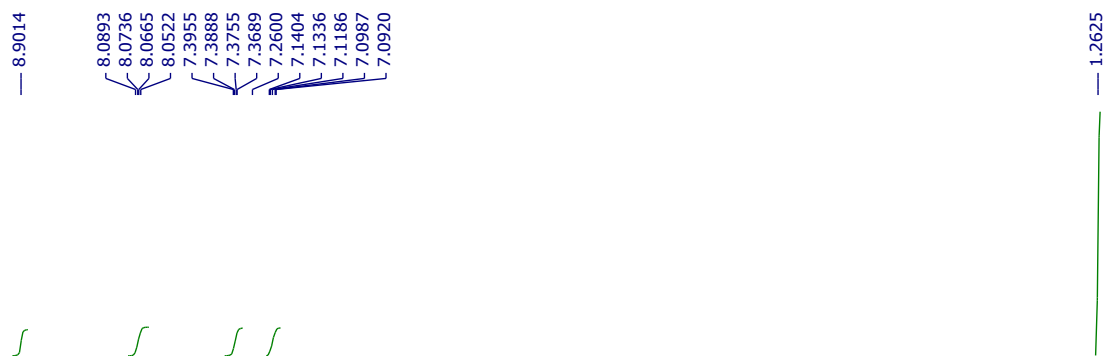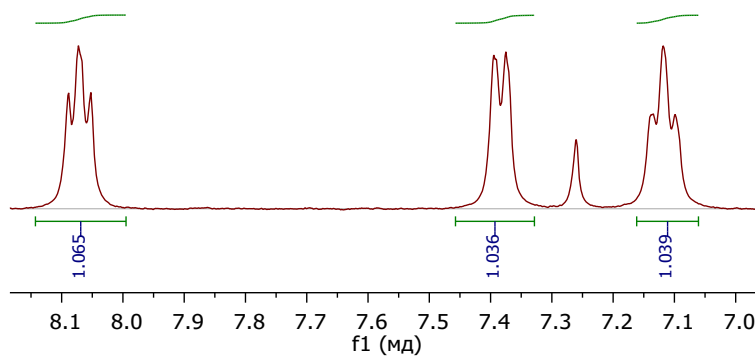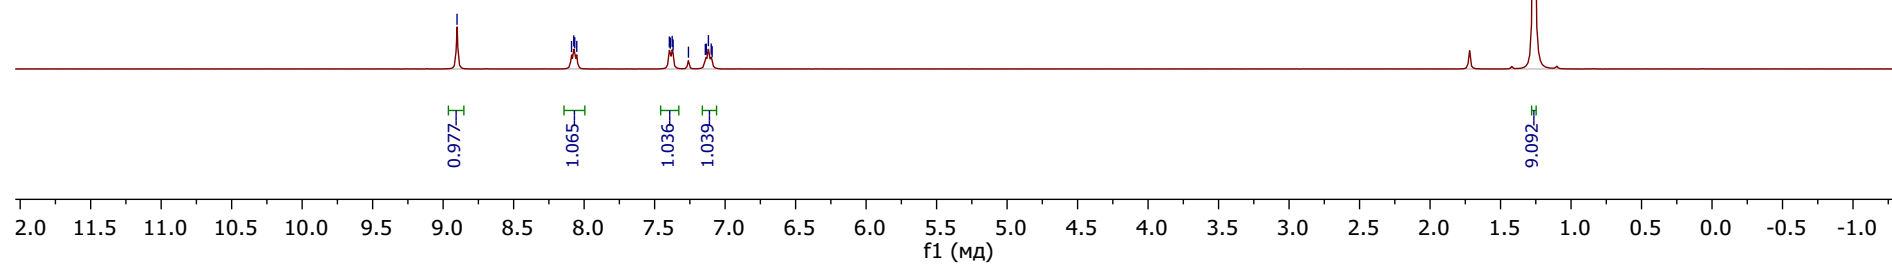



$^{13}\text{C}$  NMR (CDCl<sub>3</sub>, 101 MHz) **2a**

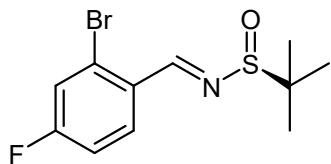

165.8777  
163.3072  
160.9851

131.4399  
131.3524  
129.5660  
129.5296  
127.1525  
127.0536  
121.0423  
120.7943  
115.7122  
115.5007

58.1312

22.7893

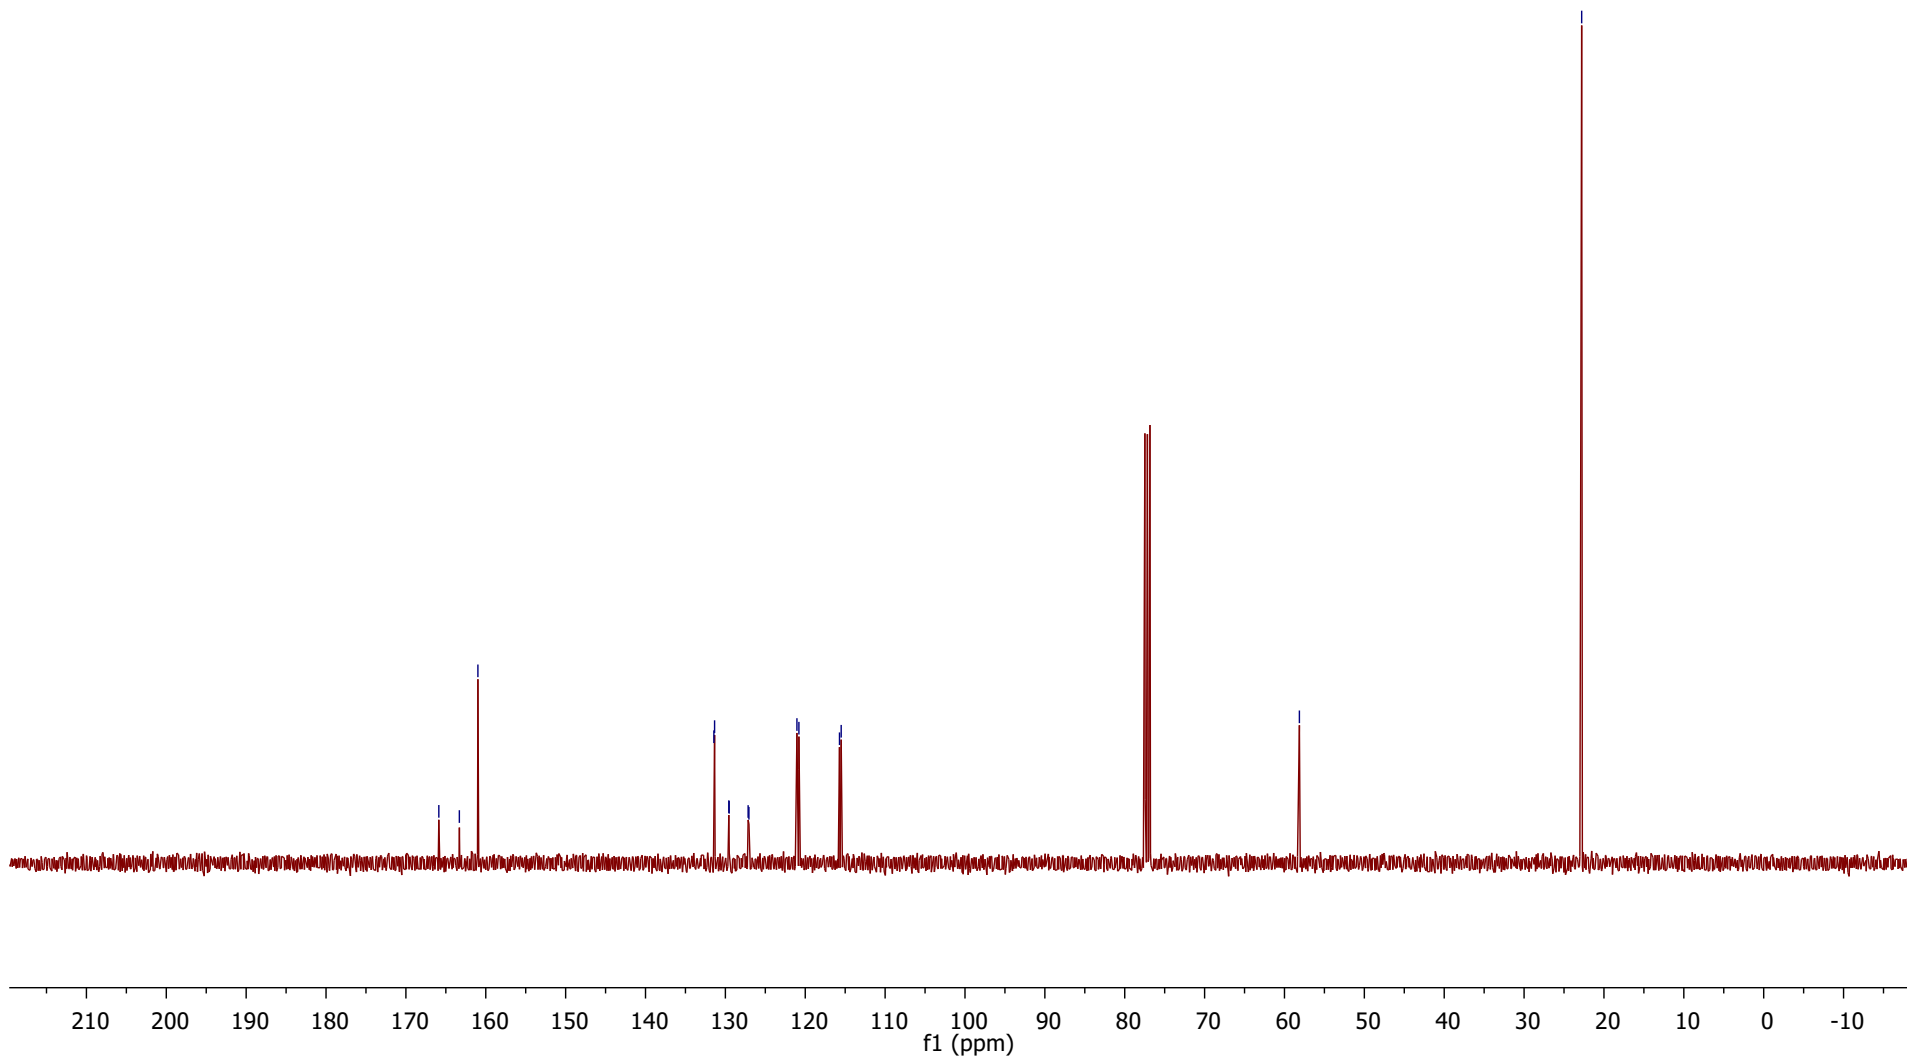

<sup>1</sup>H NMR (CDCl<sub>3</sub>, 400 MHz) **2b**

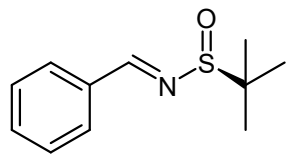

8.5734  
7.8462  
7.8291  
7.5180  
7.4390  
7.2599

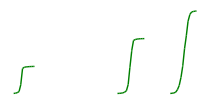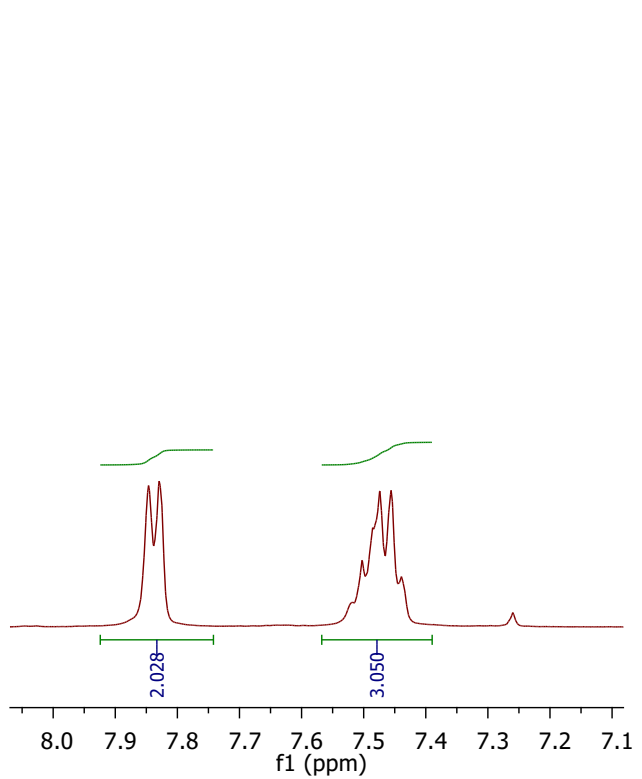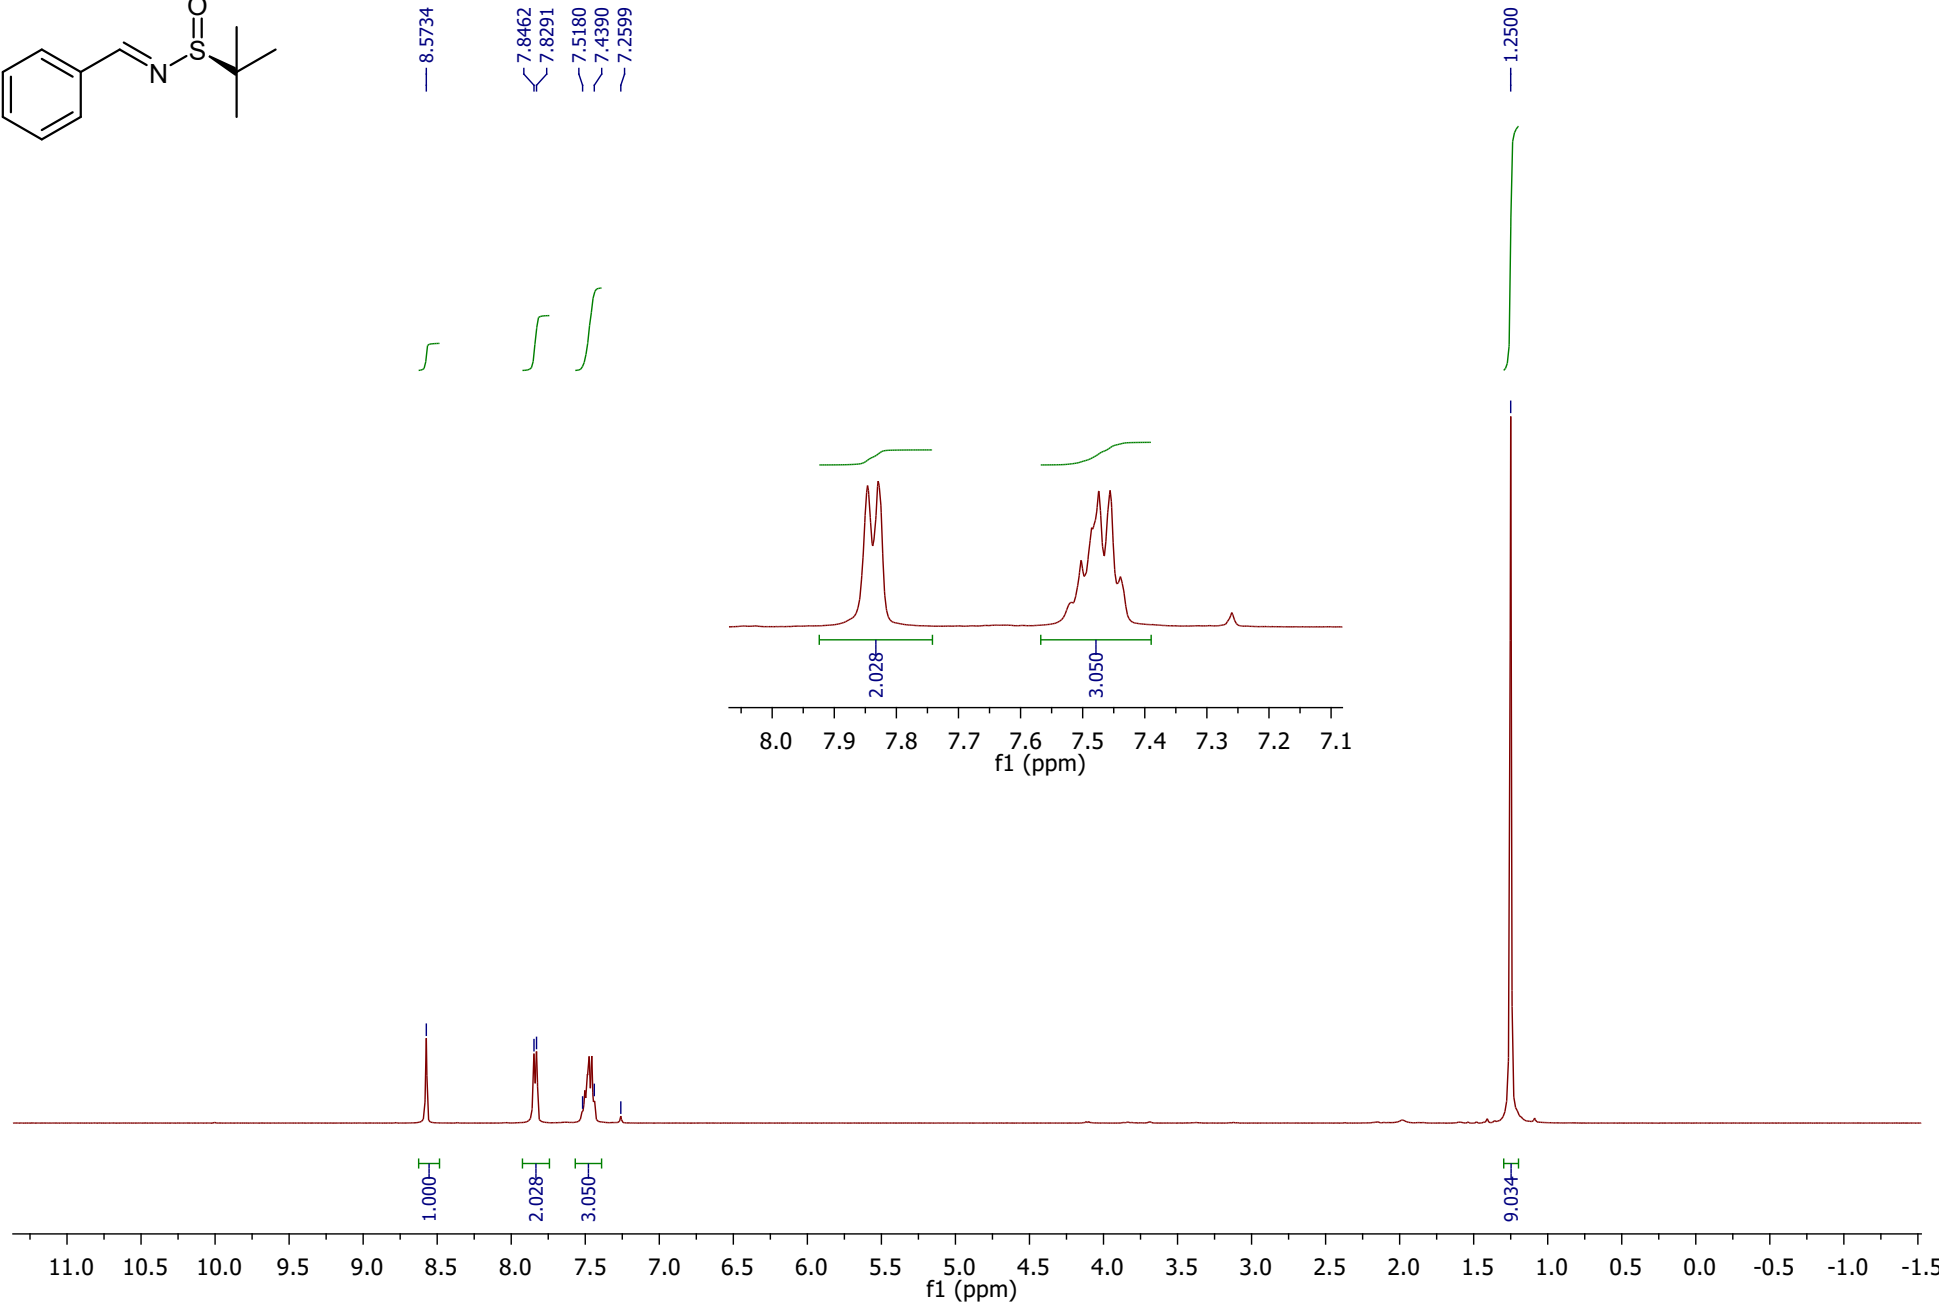

<sup>1</sup>H NMR (CDCl<sub>3</sub>, 400 MHz) **2c**

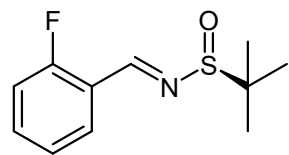

8.8939

8.0082  
7.9897  
7.9715  
7.5187  
7.5007  
7.4833  
7.4668  
7.2596  
7.2463  
7.2275  
7.2085  
7.1671  
7.1436  
7.1206

1.2610

s  
s  
s  
s

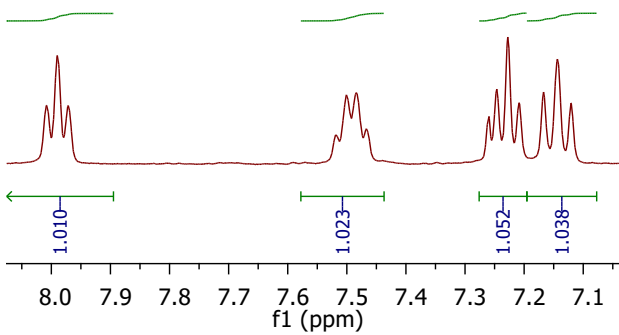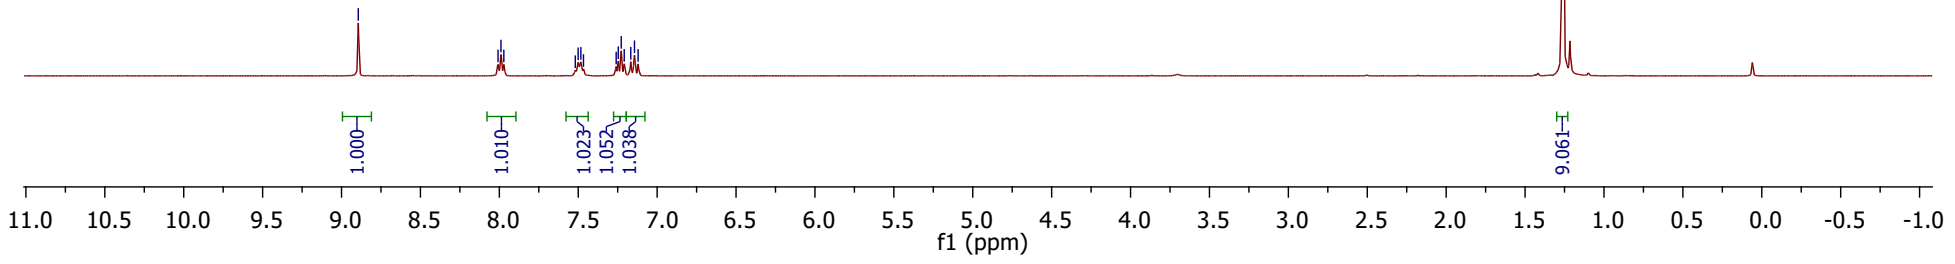

$^1\text{H}$  NMR ( $\text{CDCl}_3$ , 400 MHz) **2d**

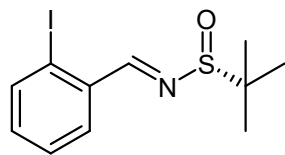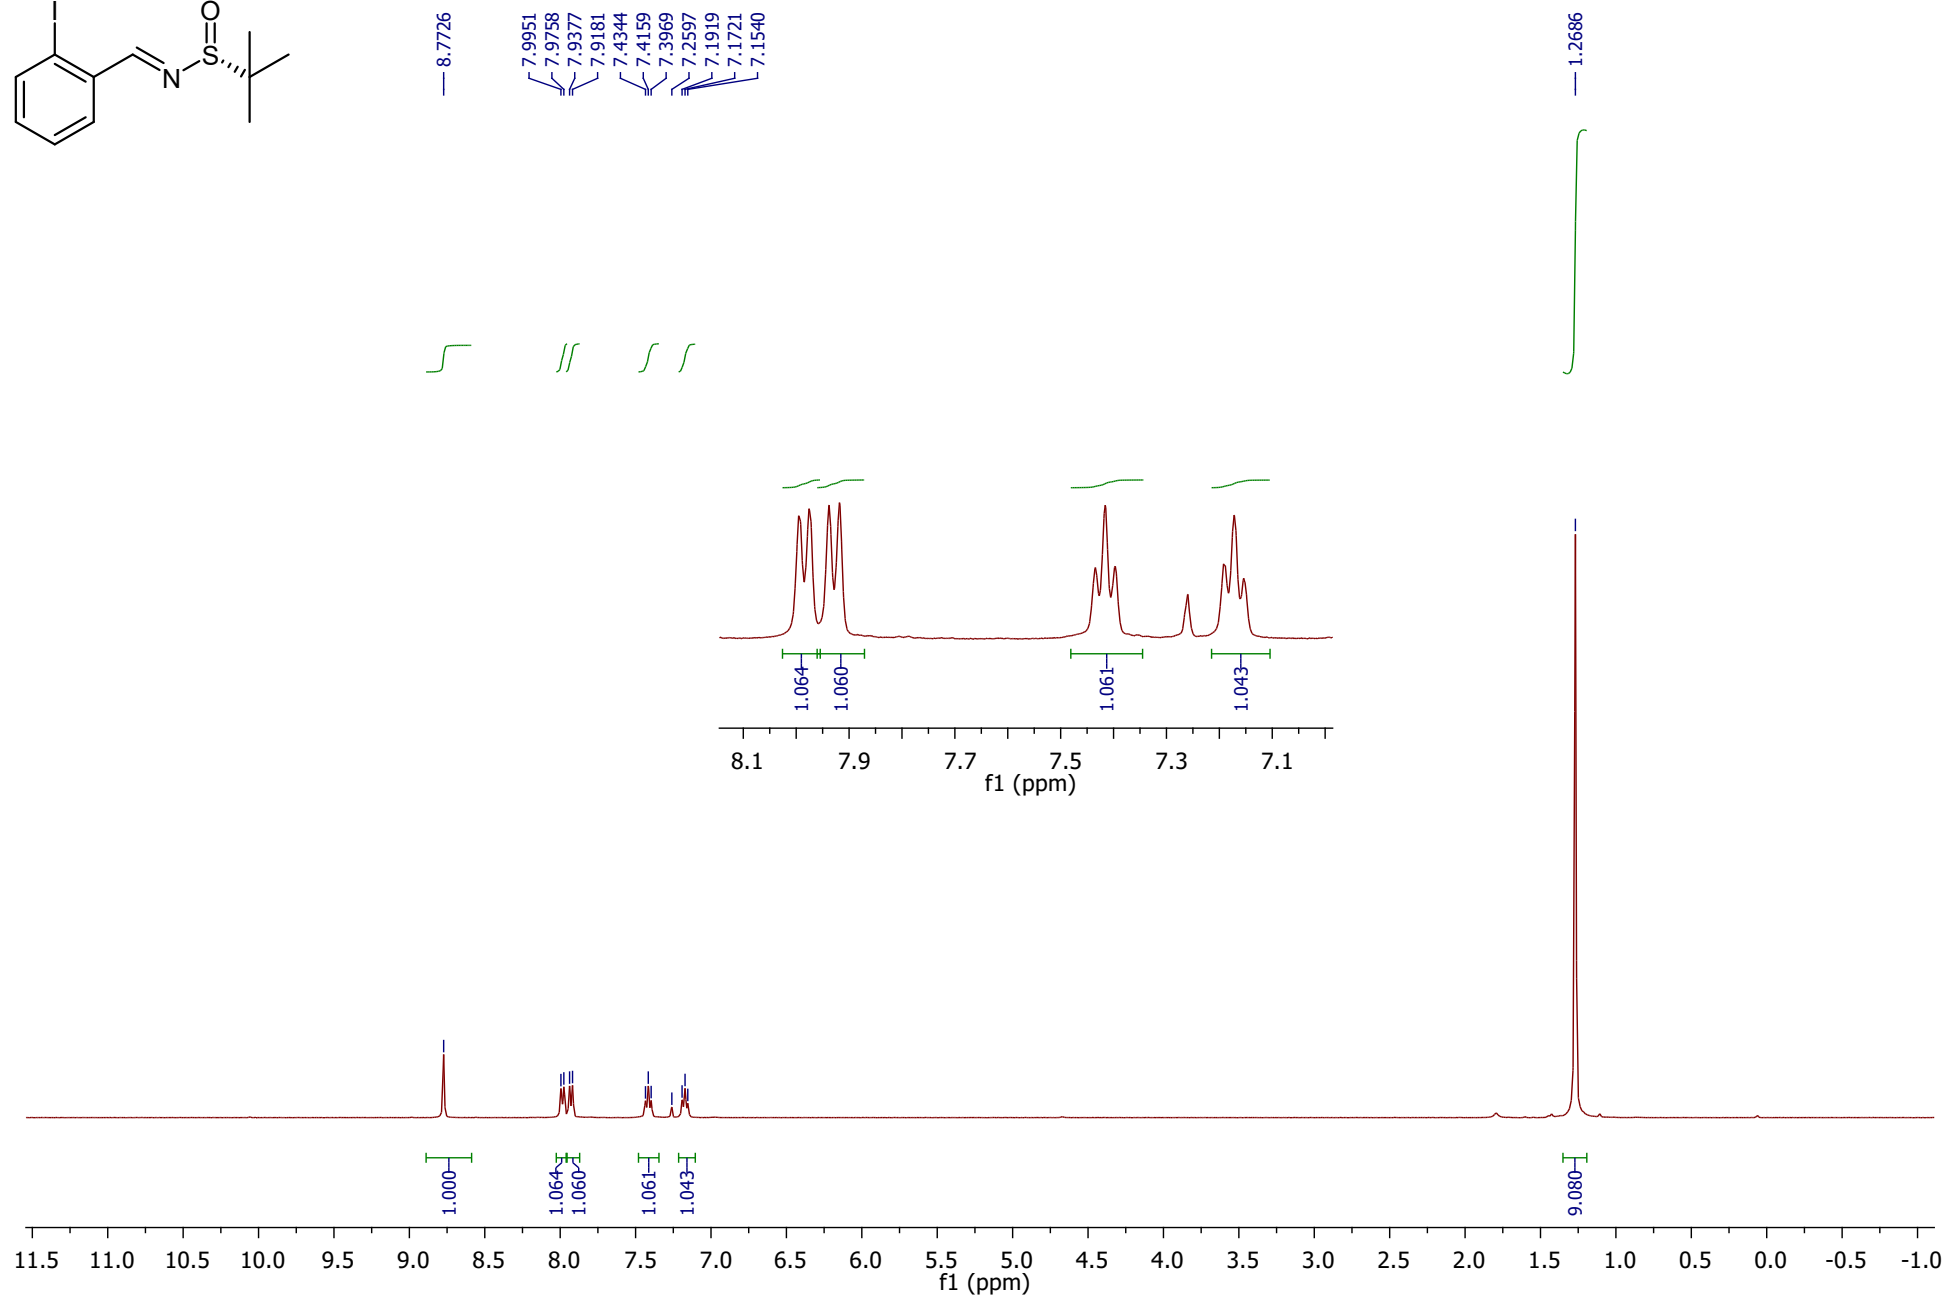

<sup>1</sup>H NMR (CDCl<sub>3</sub>, 400 MHz) 2e

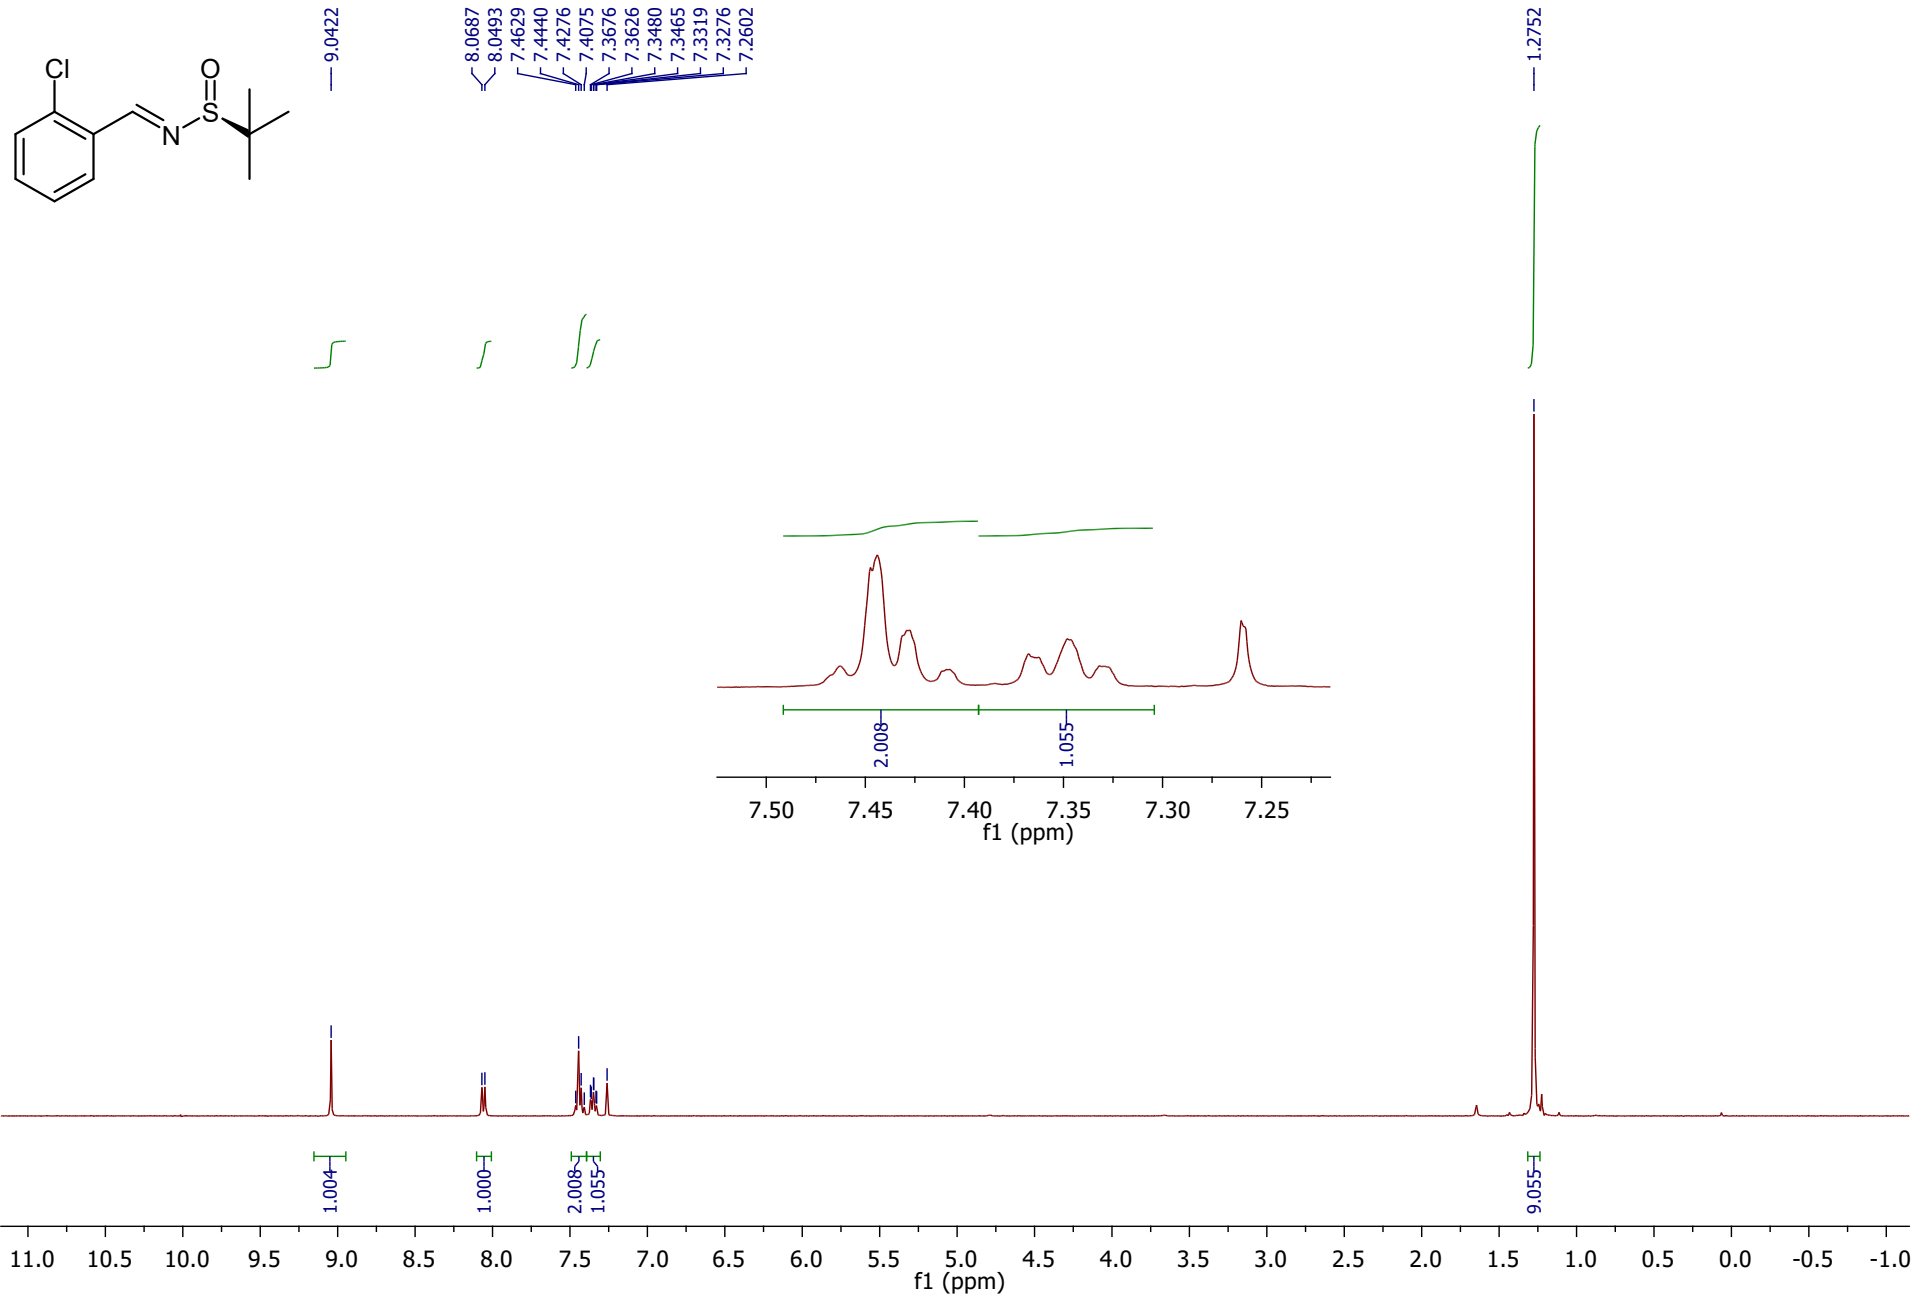

$^1\text{H}$  NMR ( $\text{CDCl}_3$ , 400 MHz) **2f**

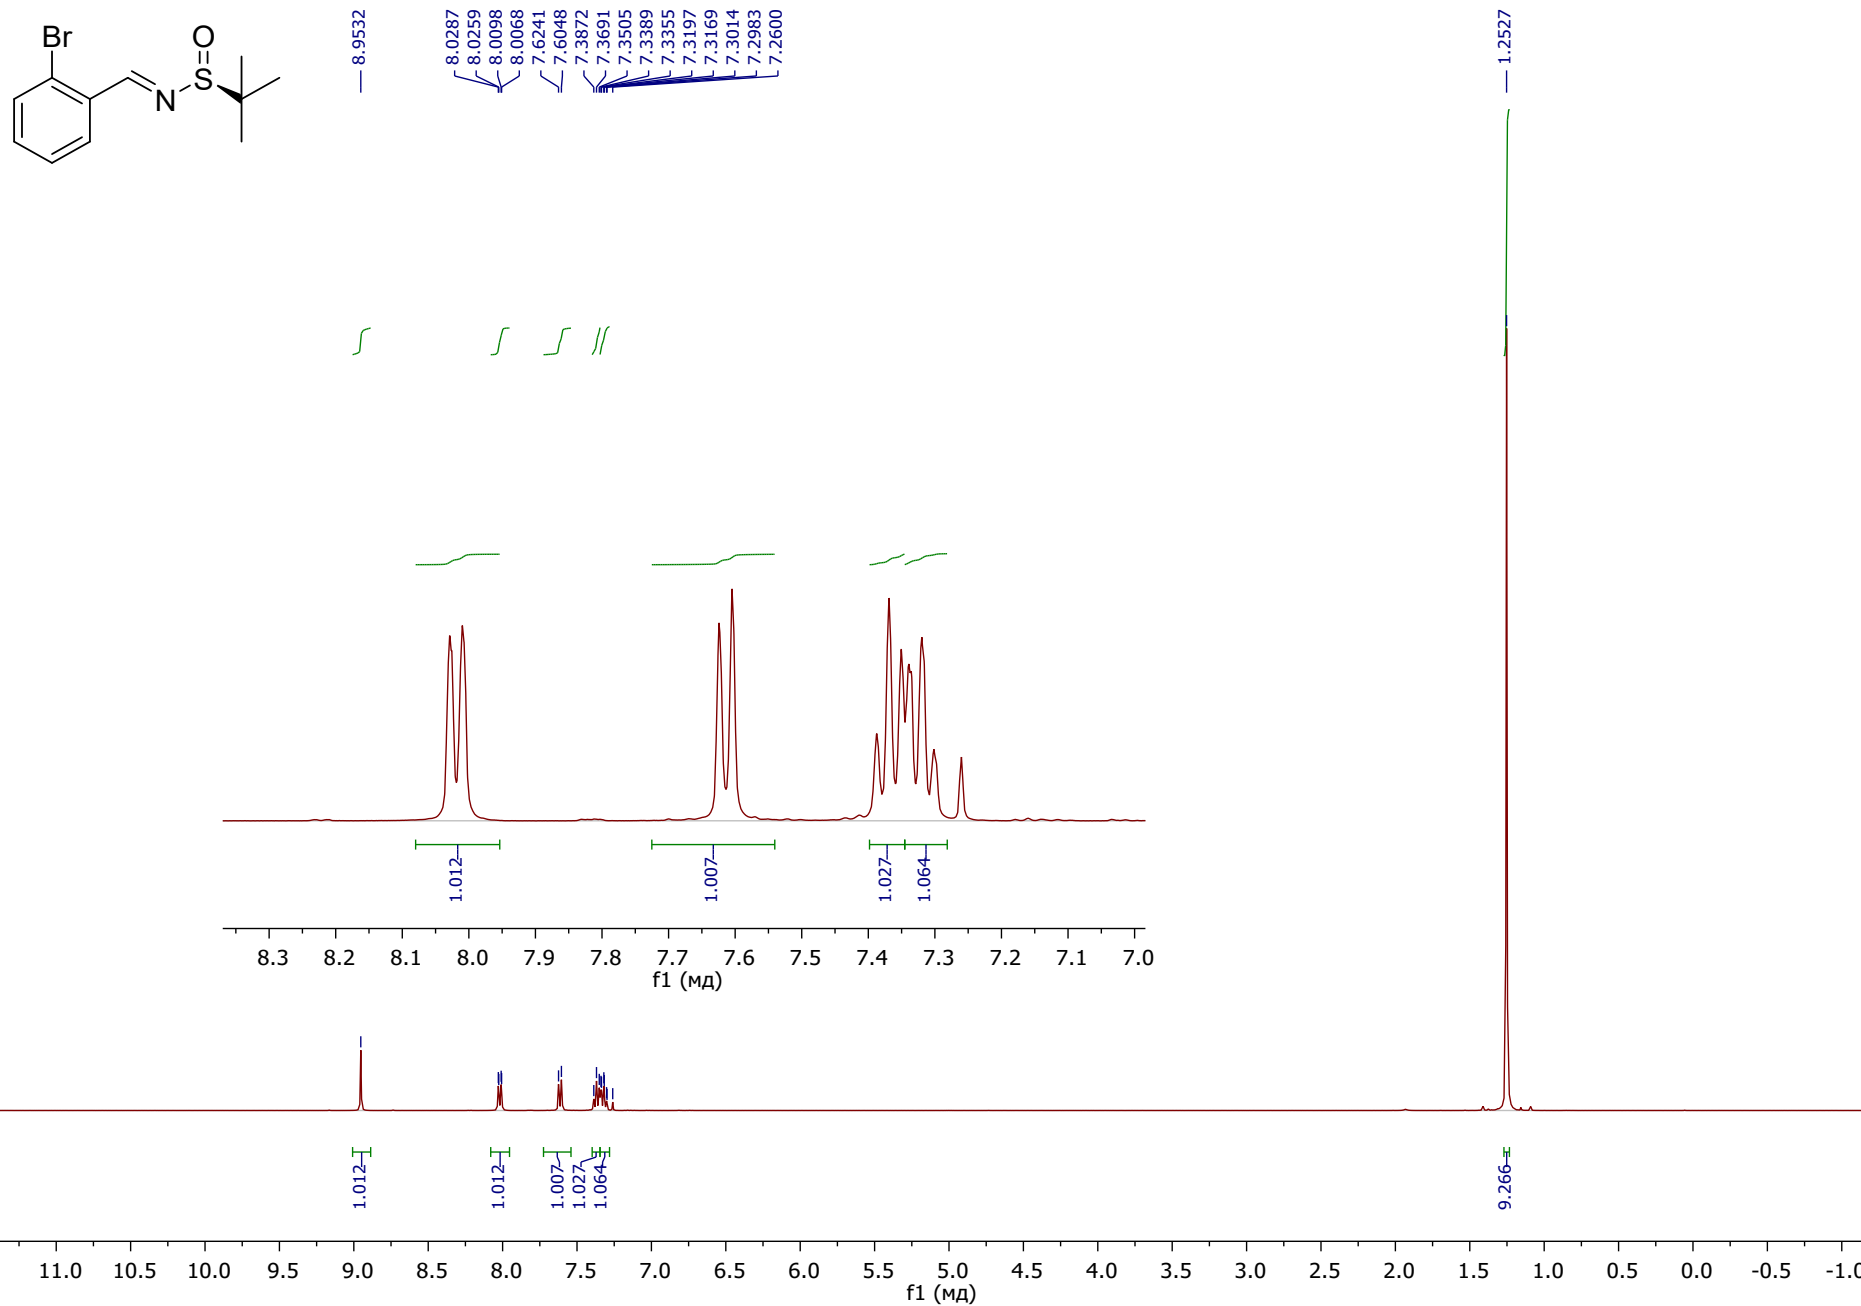

$^{13}\text{C}$  NMR (CDCl<sub>3</sub>, 101 MHz) **2f**

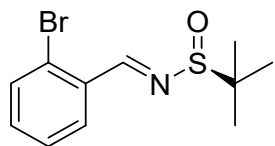

— 162.2003

133.7001  
133.3964  
132.8941  
129.6877  
127.7777  
126.4617

— 58.0619

— 22.7572

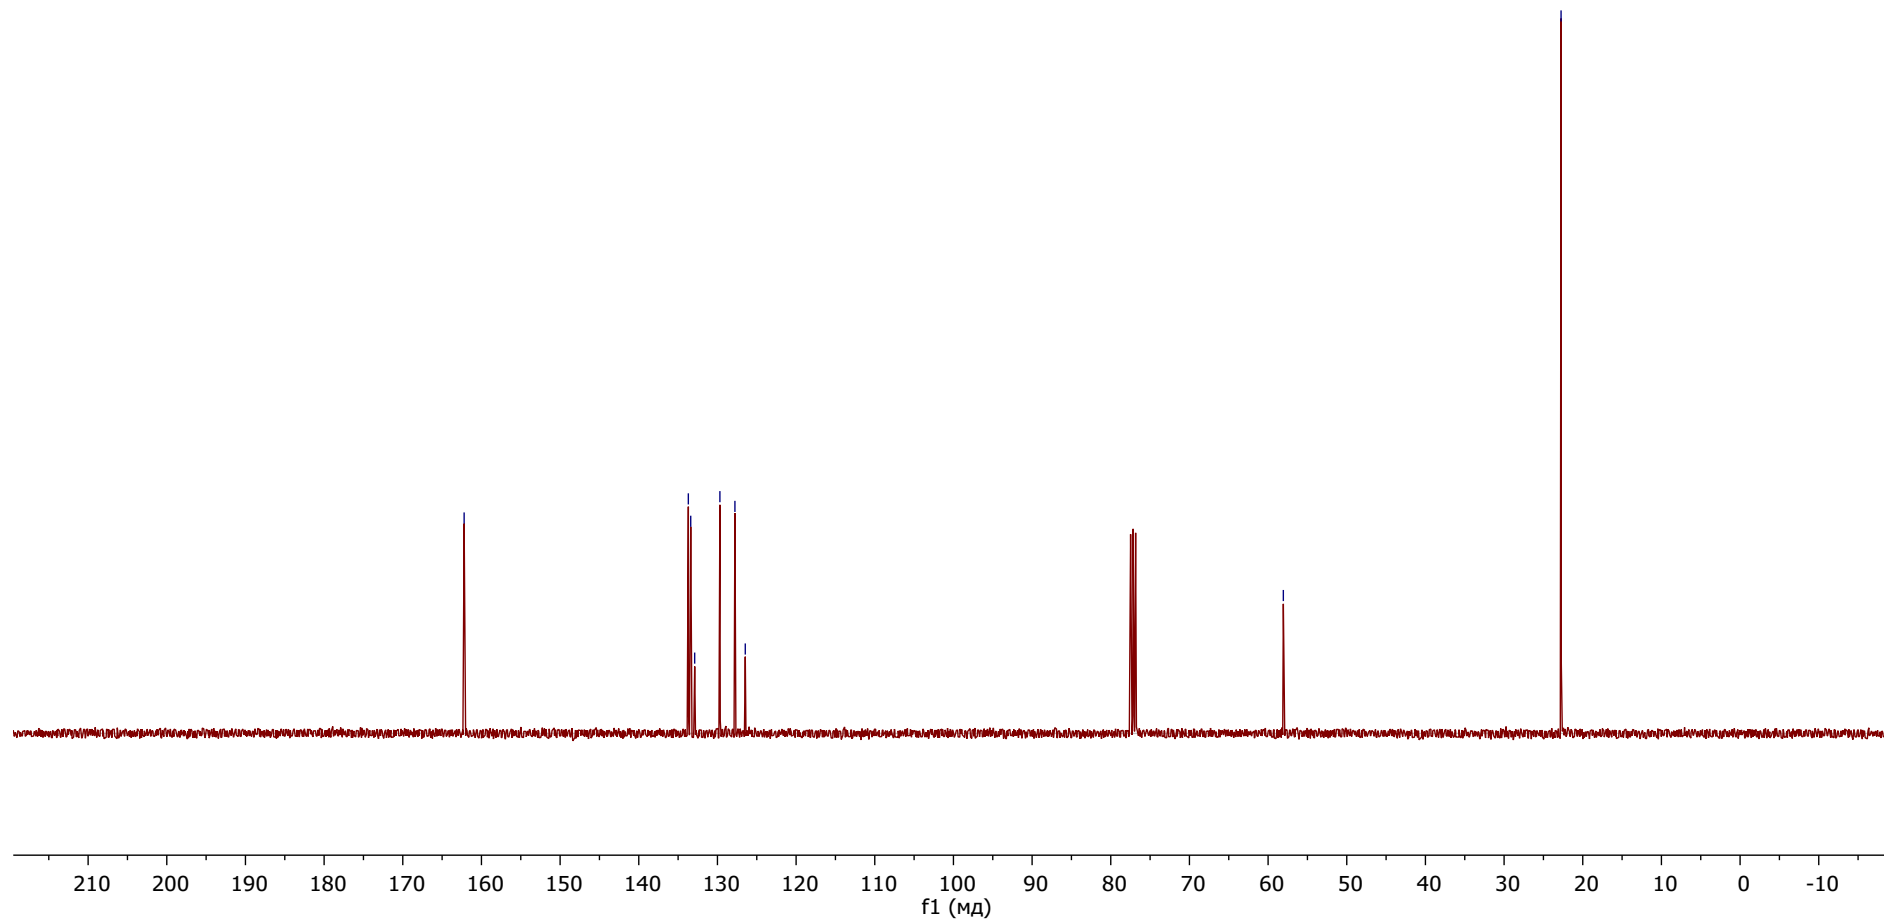

<sup>1</sup>H NMR (CDCl<sub>3</sub>, 400 MHz) **2g**

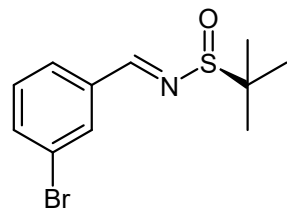

8.5030  
8.0010  
7.7271  
7.7080  
7.6281  
7.6082  
7.3581  
7.3386  
7.3191  
7.2598

s s s s s

1.2500

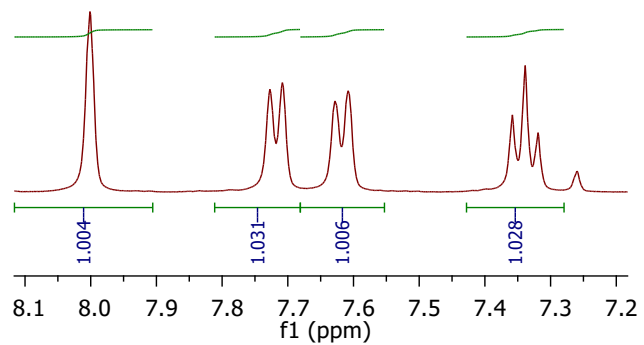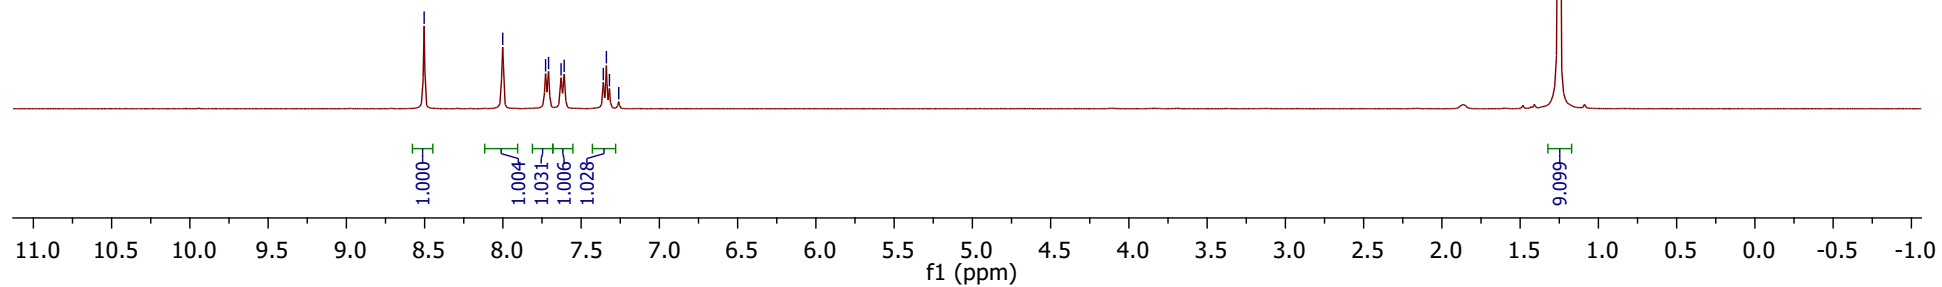



<sup>1</sup>H NMR (CDCl<sub>3</sub>, 400 MHz) **2h**

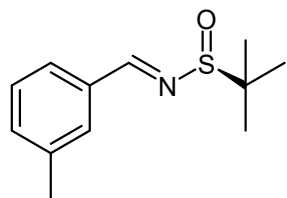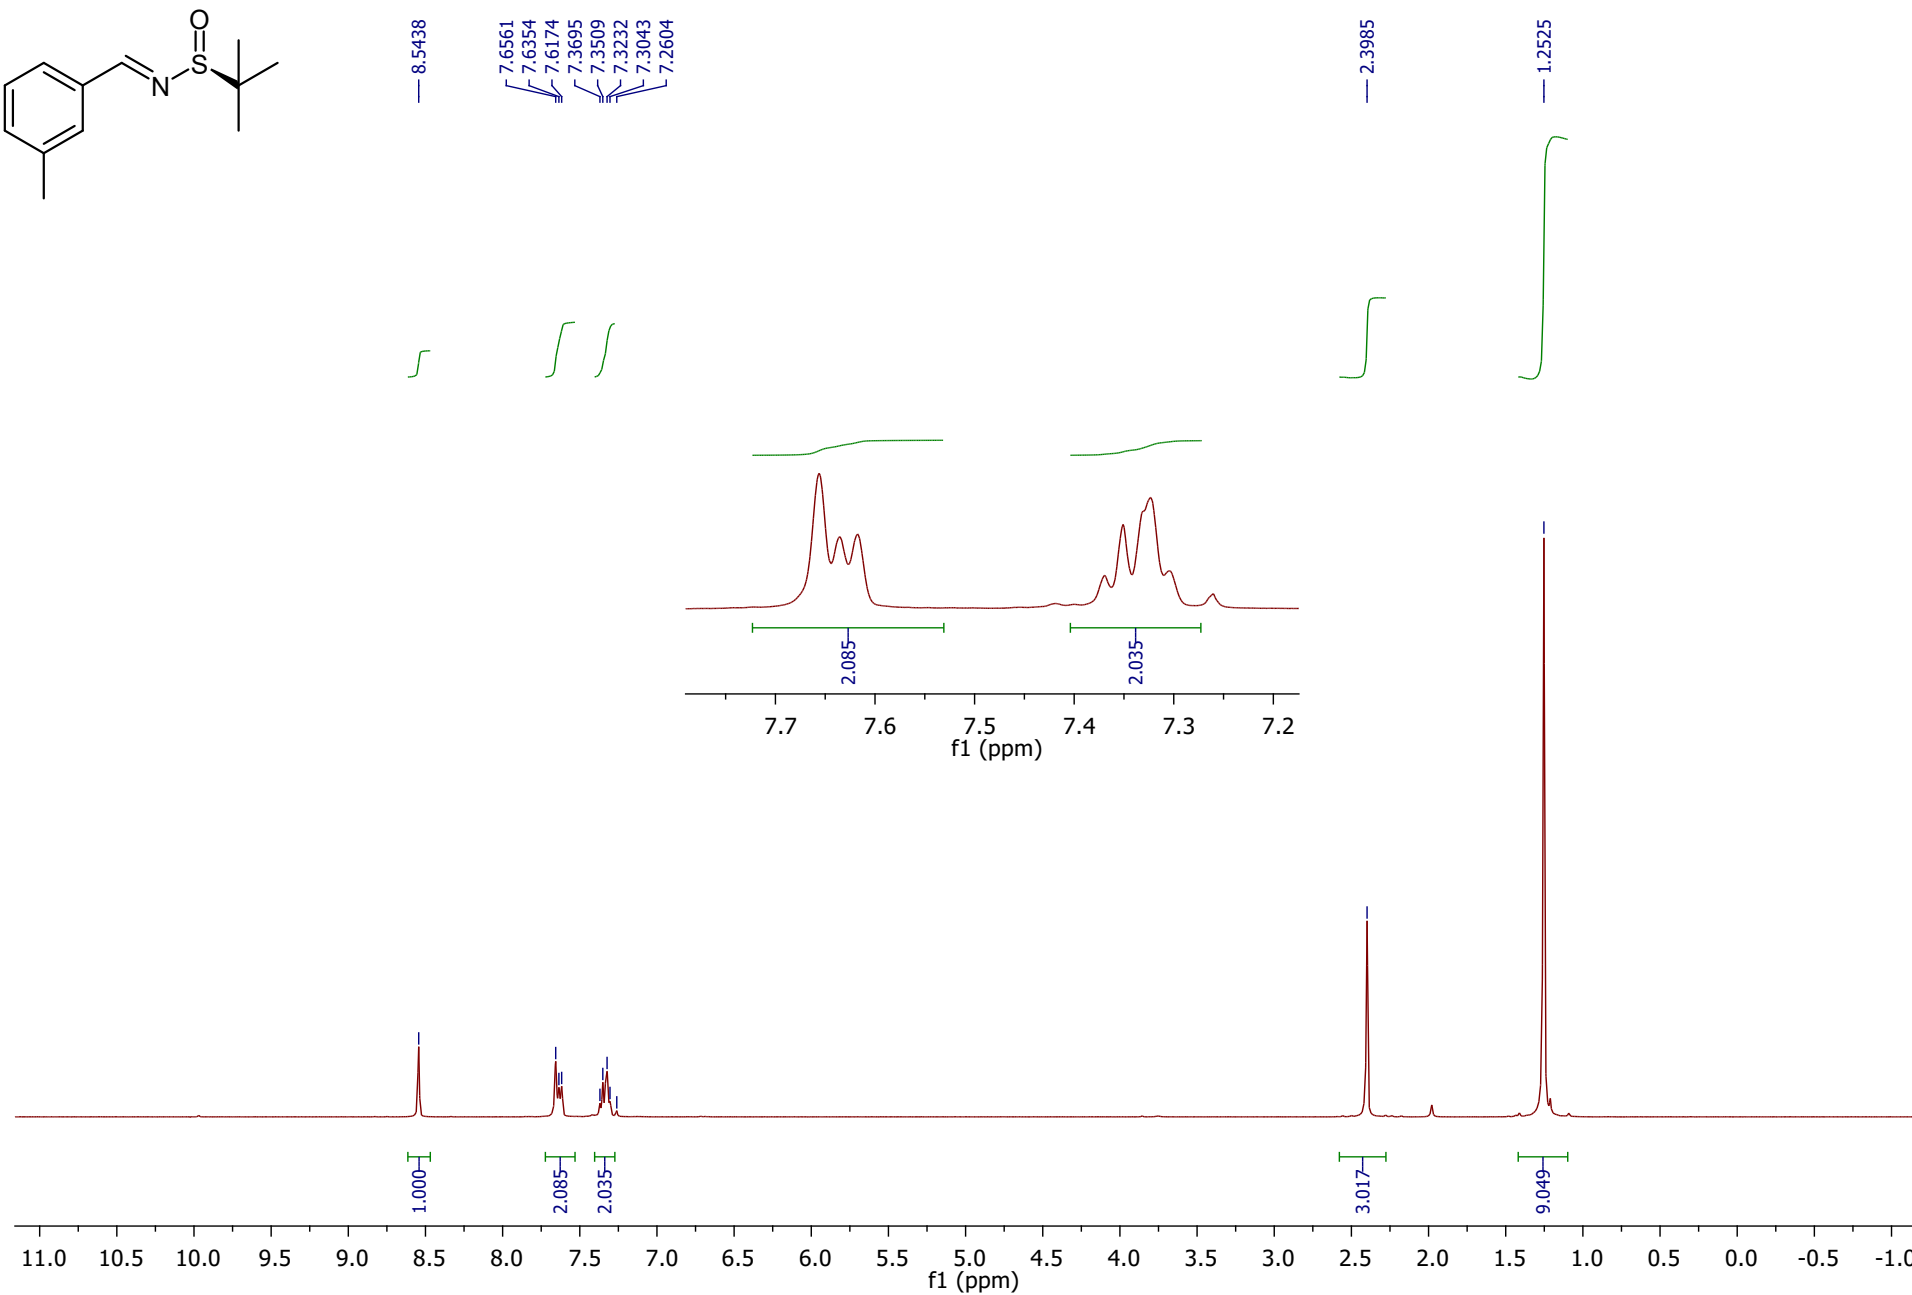

<sup>13</sup>C NMR (CDCl<sub>3</sub>, 101 MHz) **2h**

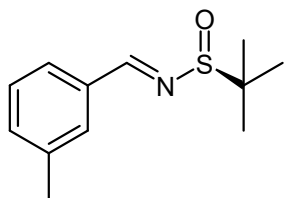

— 163.0398

~ 138.8641  
~ 134.1682  
~ 133.3965  
~ 129.7804  
~ 128.9463  
~ 126.9557

— 57.8444

~ 22.7161  
~ 21.4026

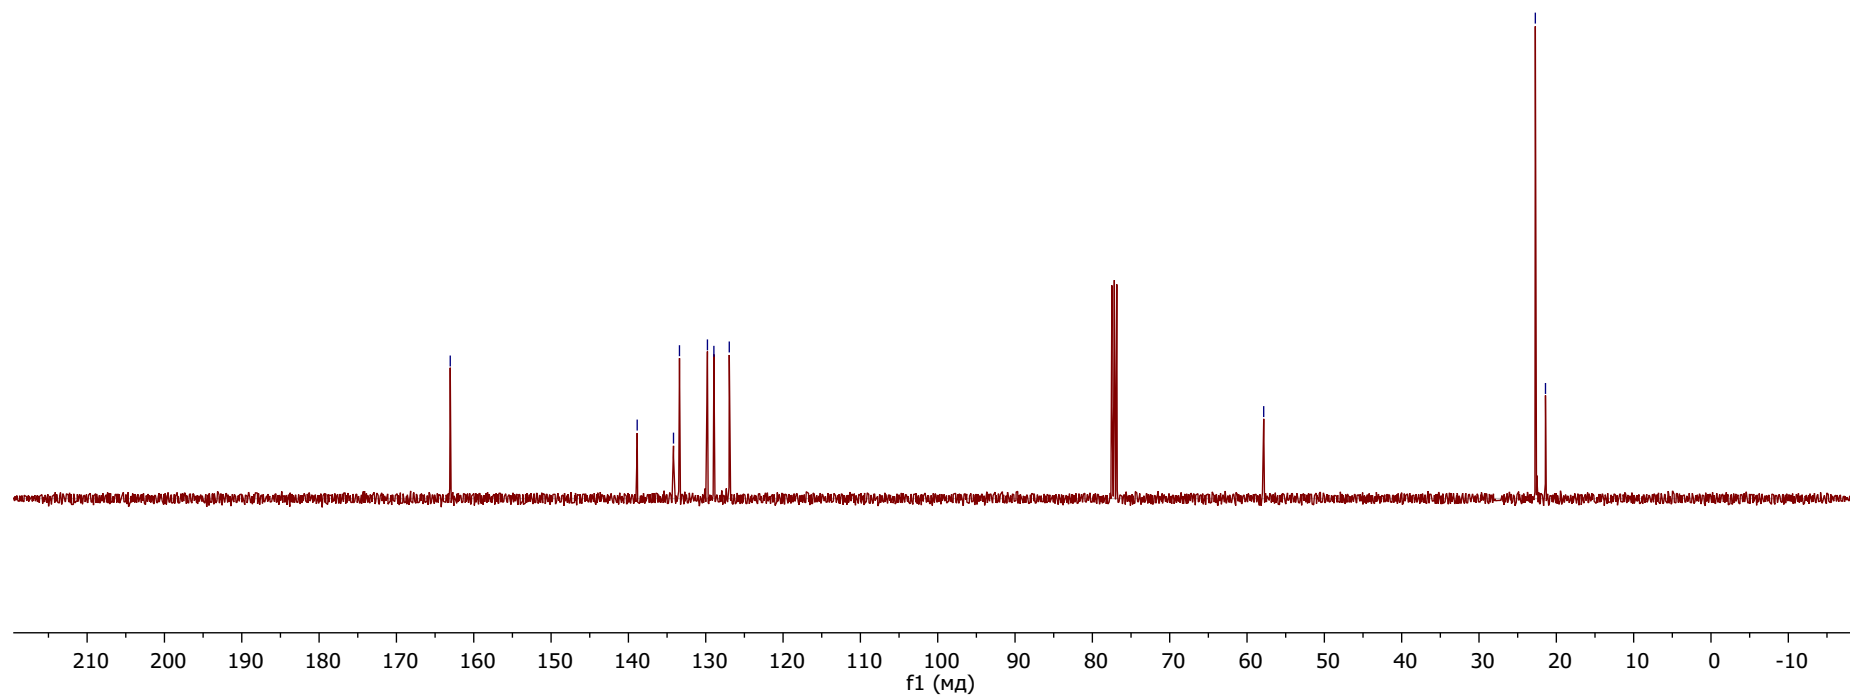

<sup>1</sup>H NMR (CDCl<sub>3</sub>, 400 MHz) **2i**

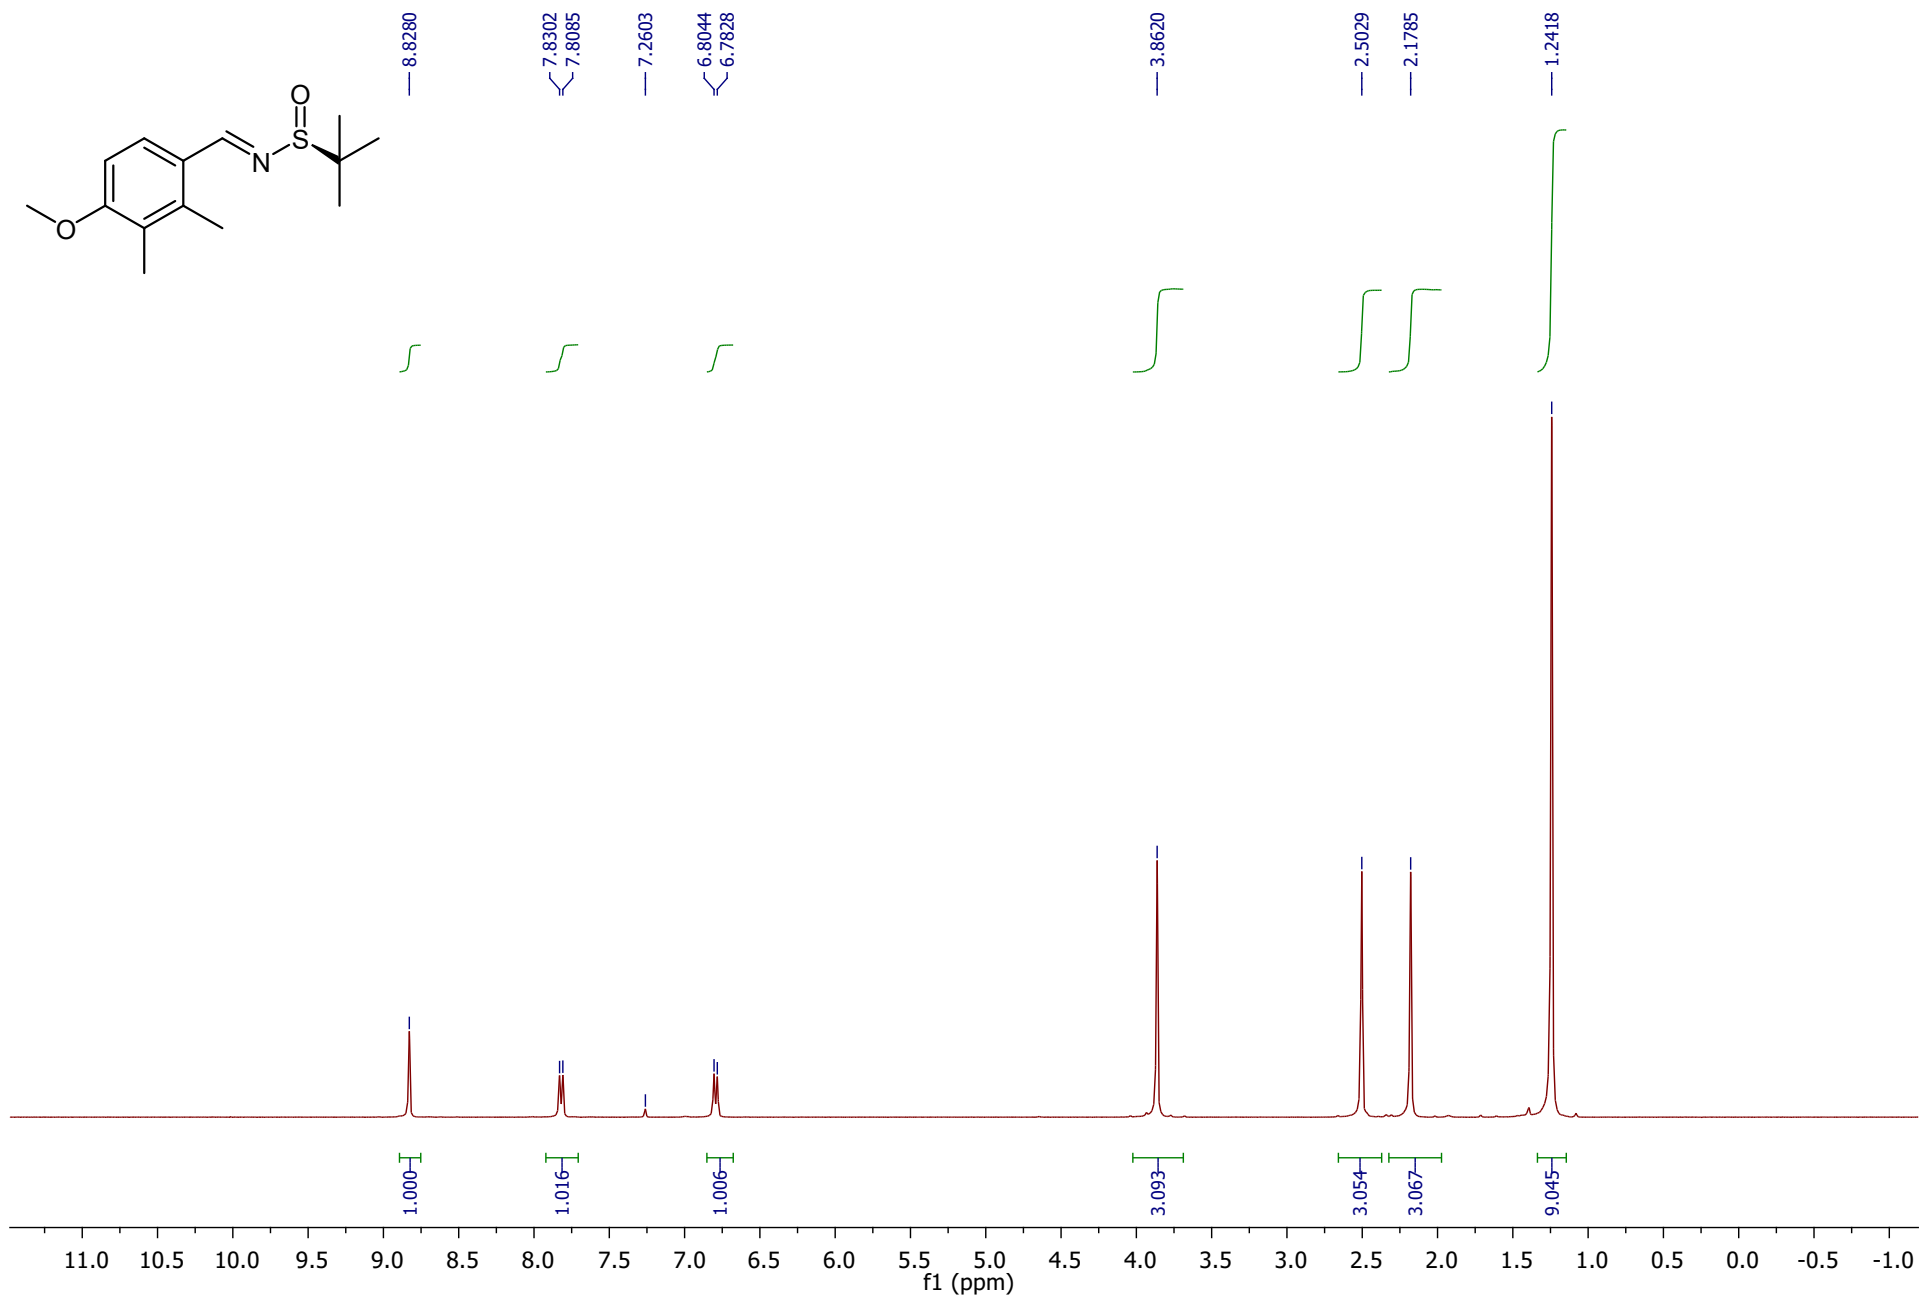

$^{13}\text{C}$  NMR (CDCl<sub>3</sub>, 101 MHz) **2i**

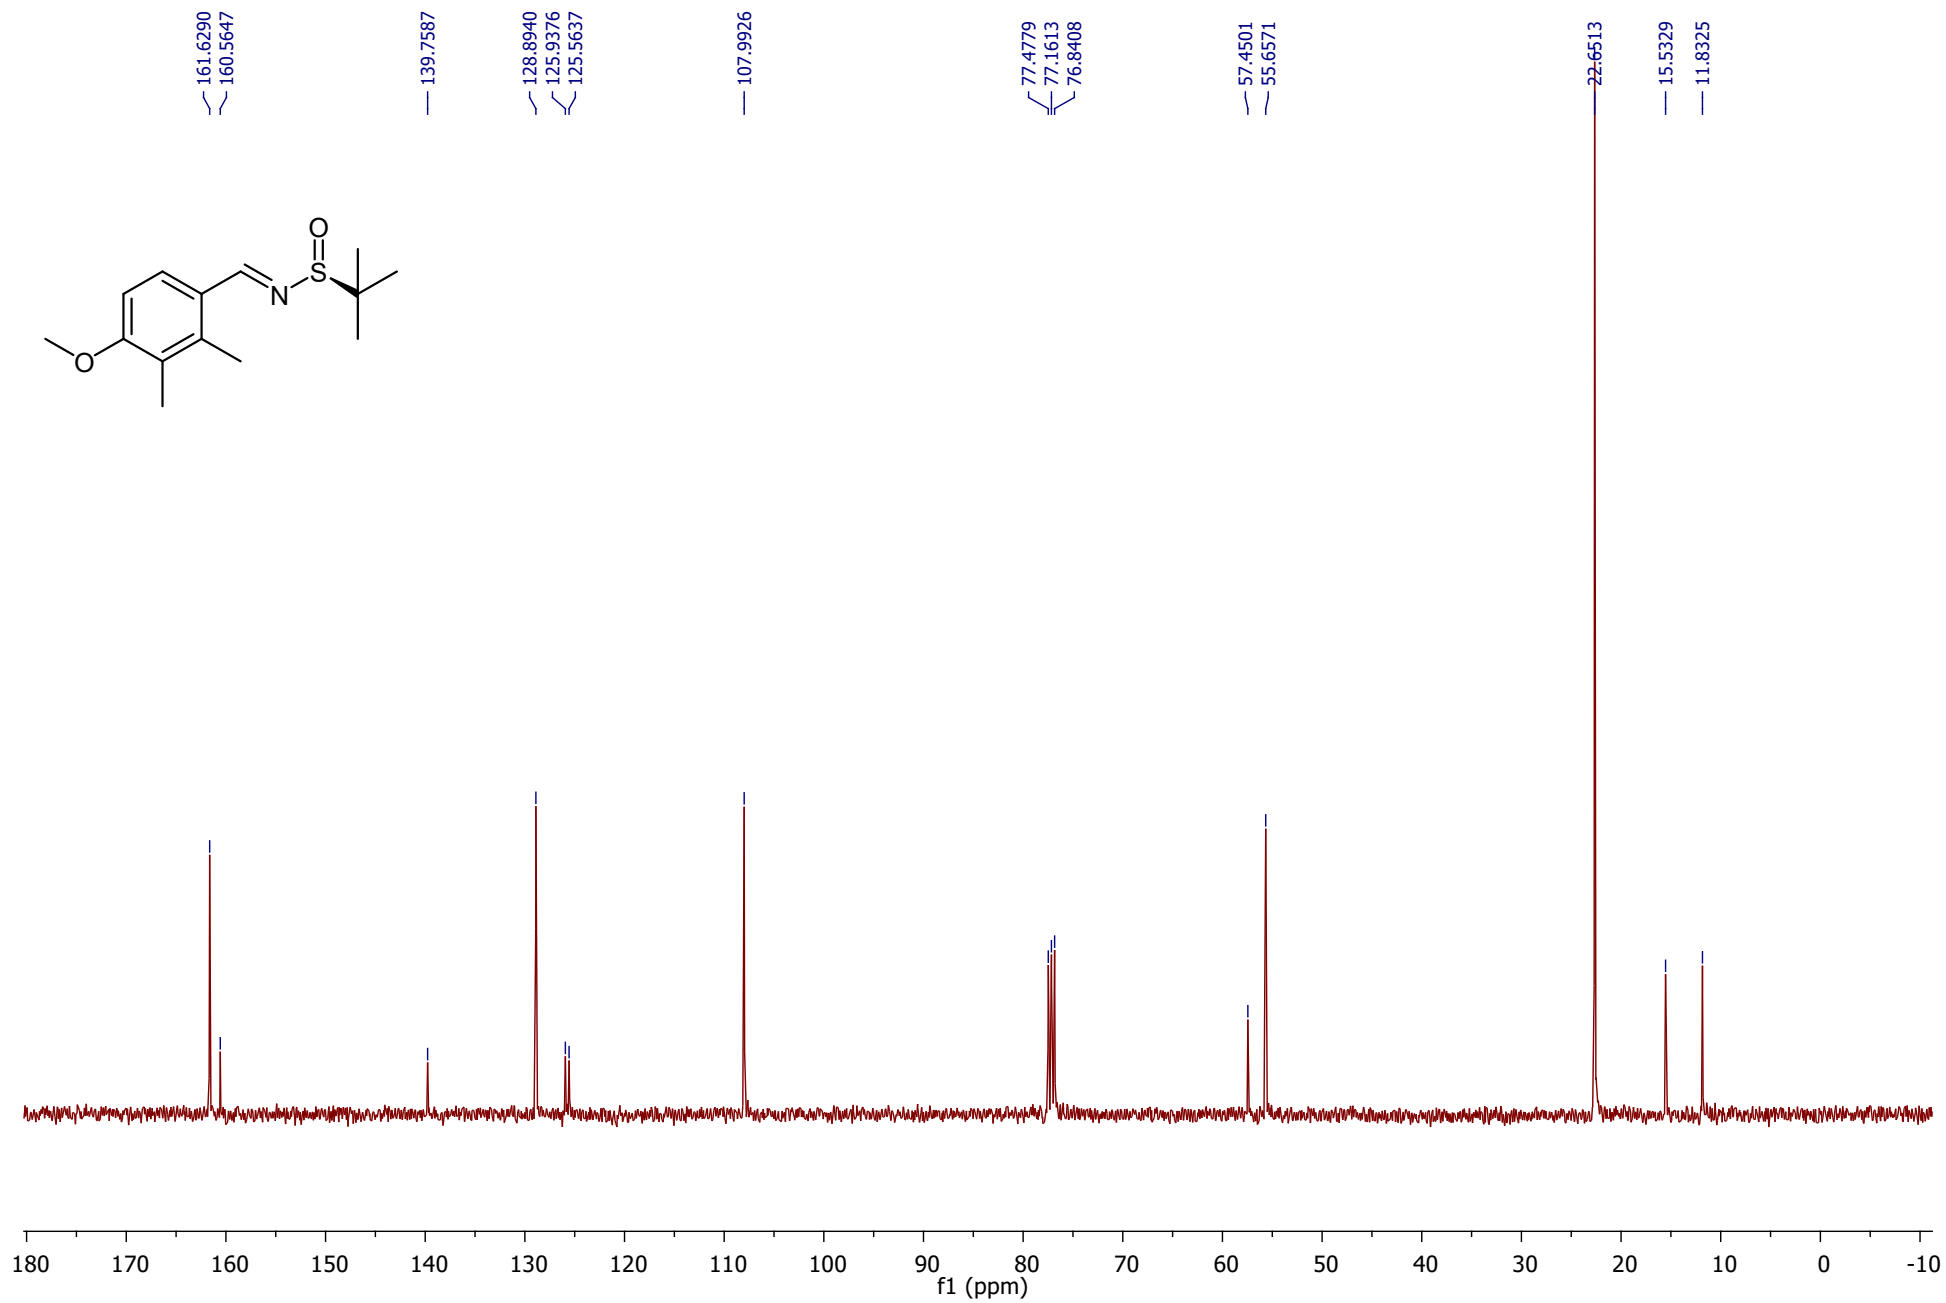

<sup>1</sup>H NMR (CDCl<sub>3</sub>, 400 MHz) **2j**

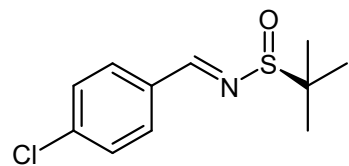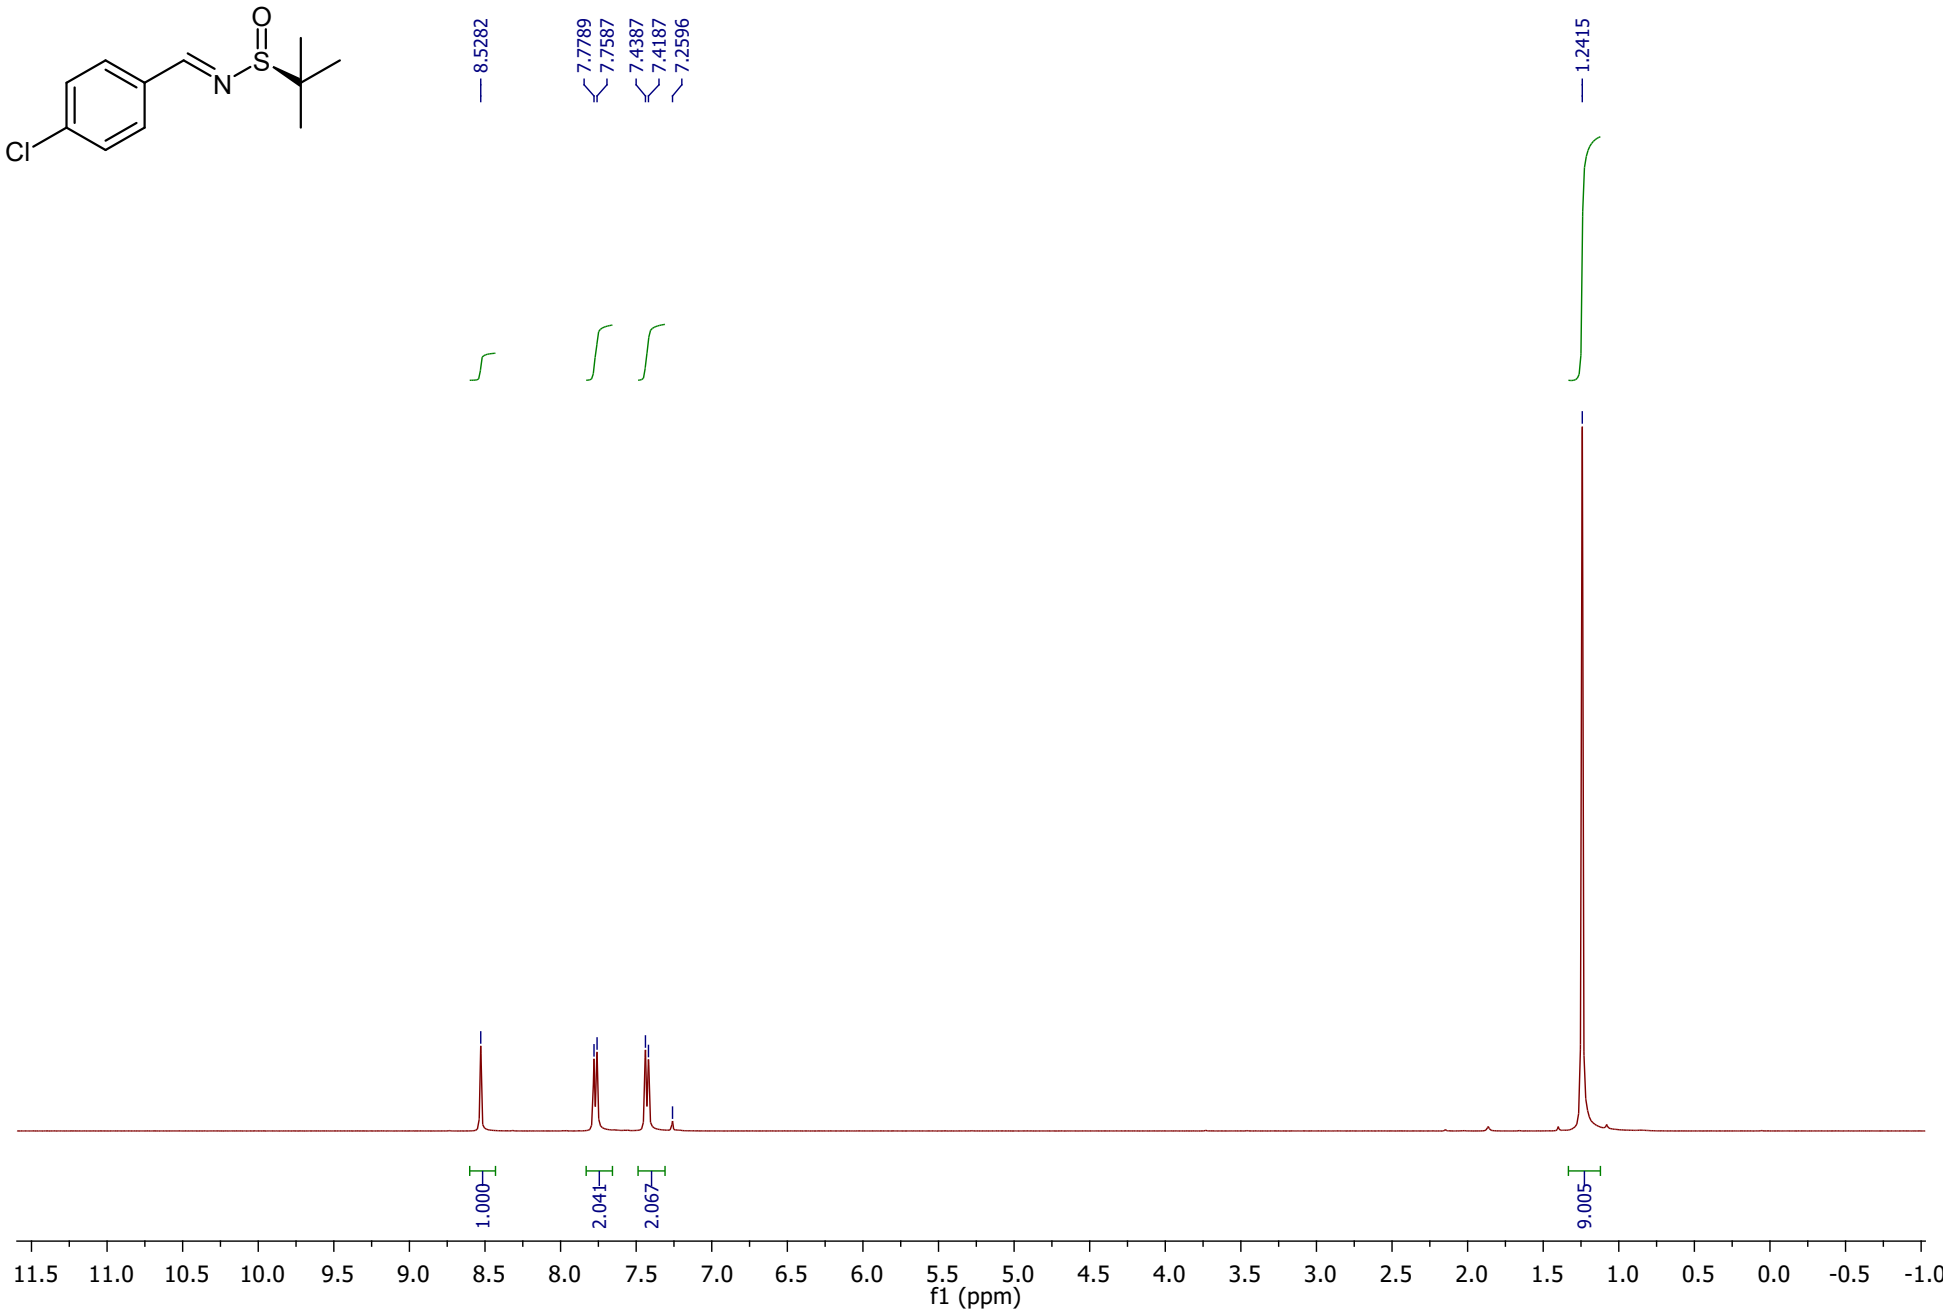

<sup>1</sup>H NMR (CDCl<sub>3</sub>, 400 MHz) **2k**

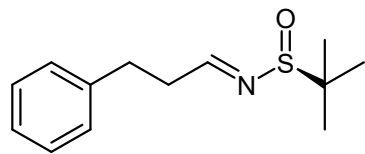

8.1210  
8.1104  
8.1000  
7.3059  
7.2868  
7.2686  
7.2604  
7.2162  
7.1976  
7.1767

2.9937  
2.9547  
2.8893  
2.8387

1.1252

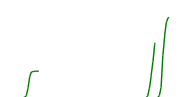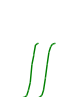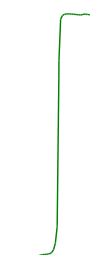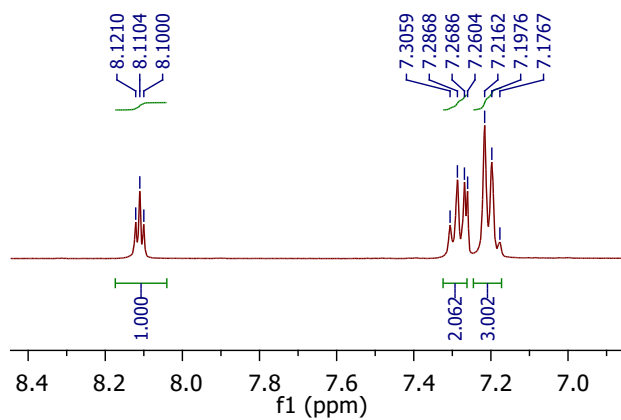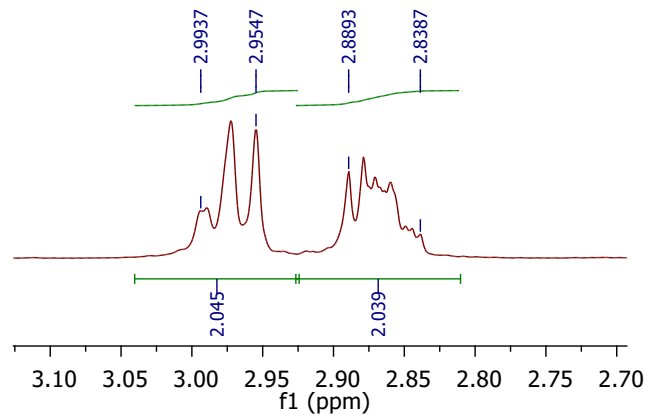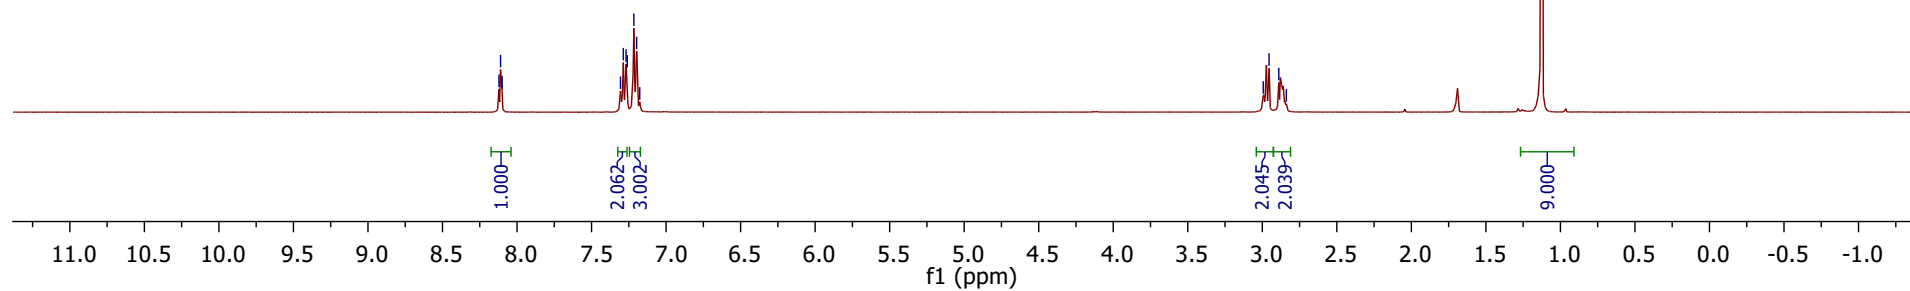

<sup>1</sup>H NMR (CDCl<sub>3</sub>, 400 MHz) **21**

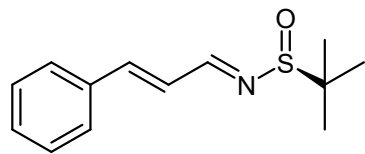

8.3860  
8.3630  
7.5528  
7.5482  
7.5340  
7.4050  
7.3894  
7.2600  
7.2218  
7.1167  
7.0936  
7.0769  
7.0540

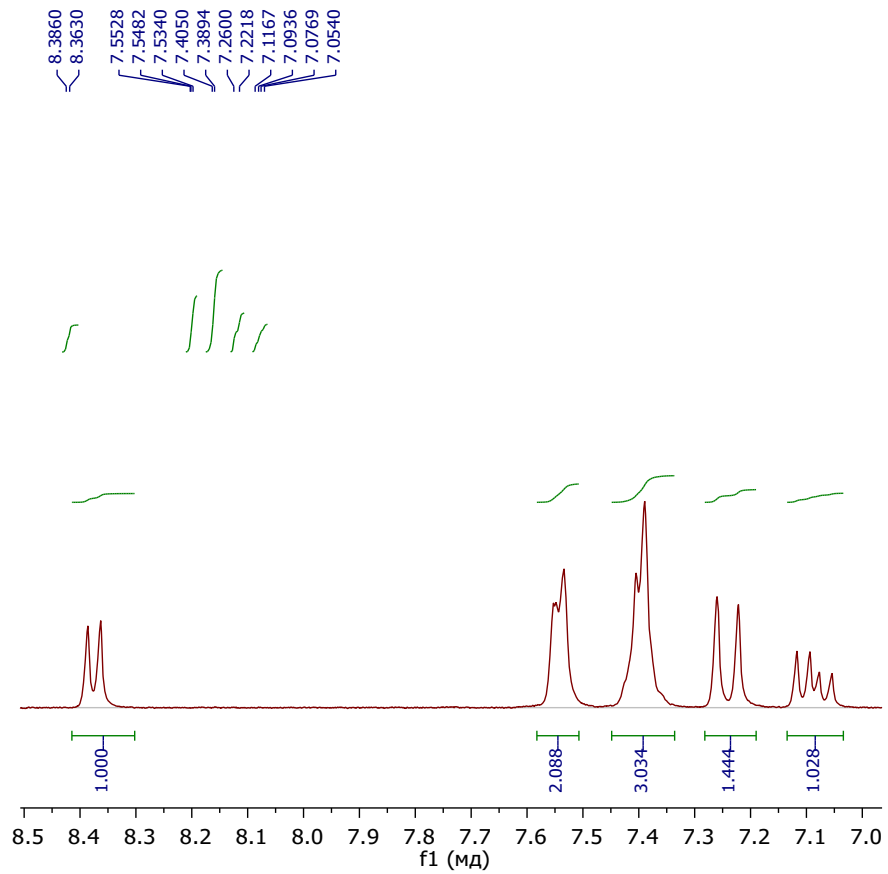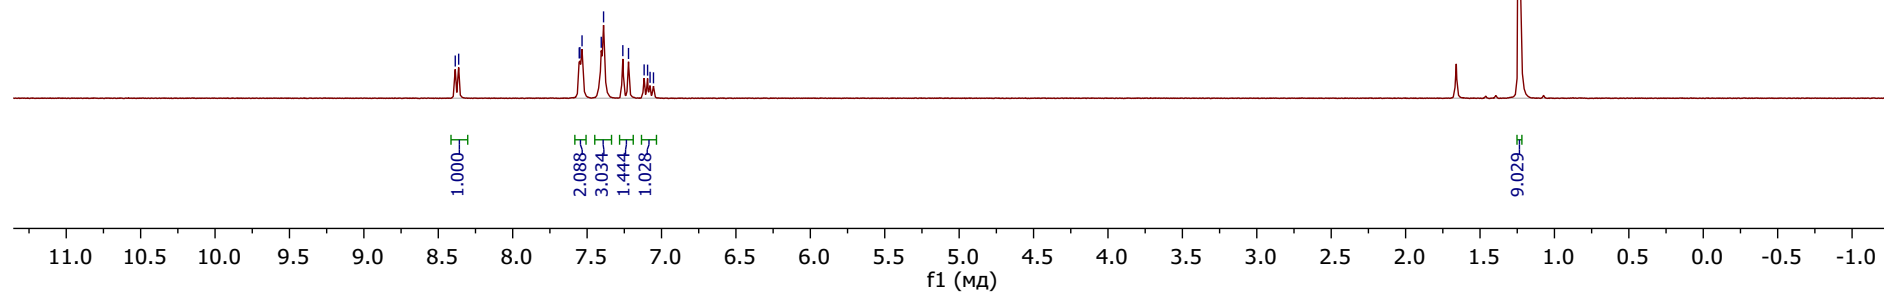

1.2349  
9.029

<sup>1</sup>H NMR (CDCl<sub>3</sub>, 400 MHz) **2m**

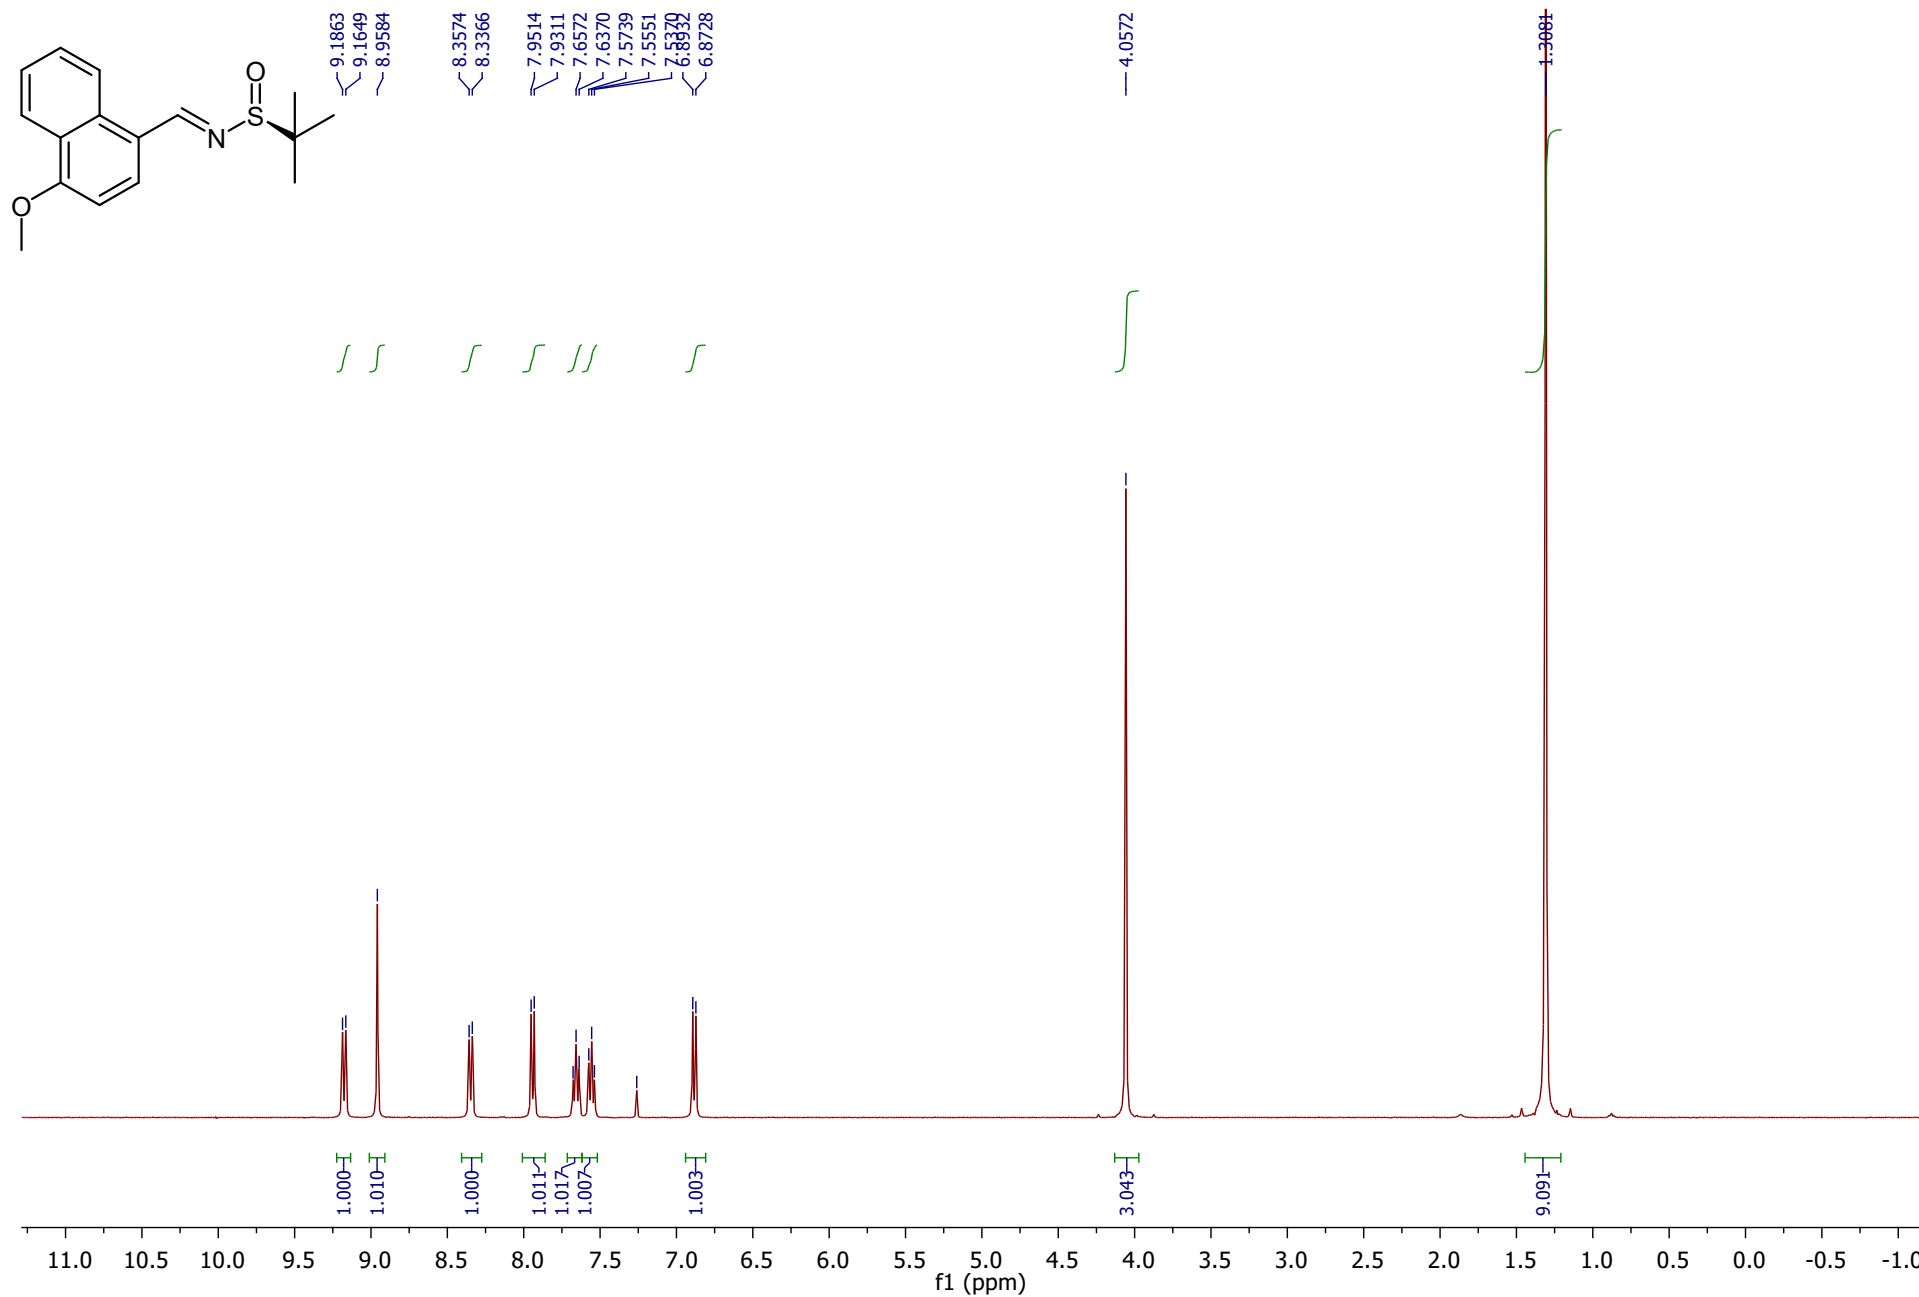



$^{13}\text{C}$  NMR (CDCl<sub>3</sub>, 101 MHz) **2m**

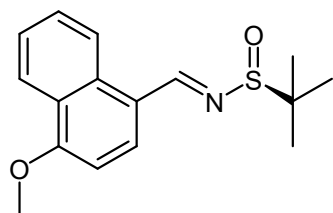

162.4004  
159.4618

135.2351  
132.3623  
128.7194  
126.0223  
125.8115  
124.7520  
122.7377  
122.5927

103.4767

77.4787  
77.1621  
76.8433

57.4814  
55.9517

22.6788

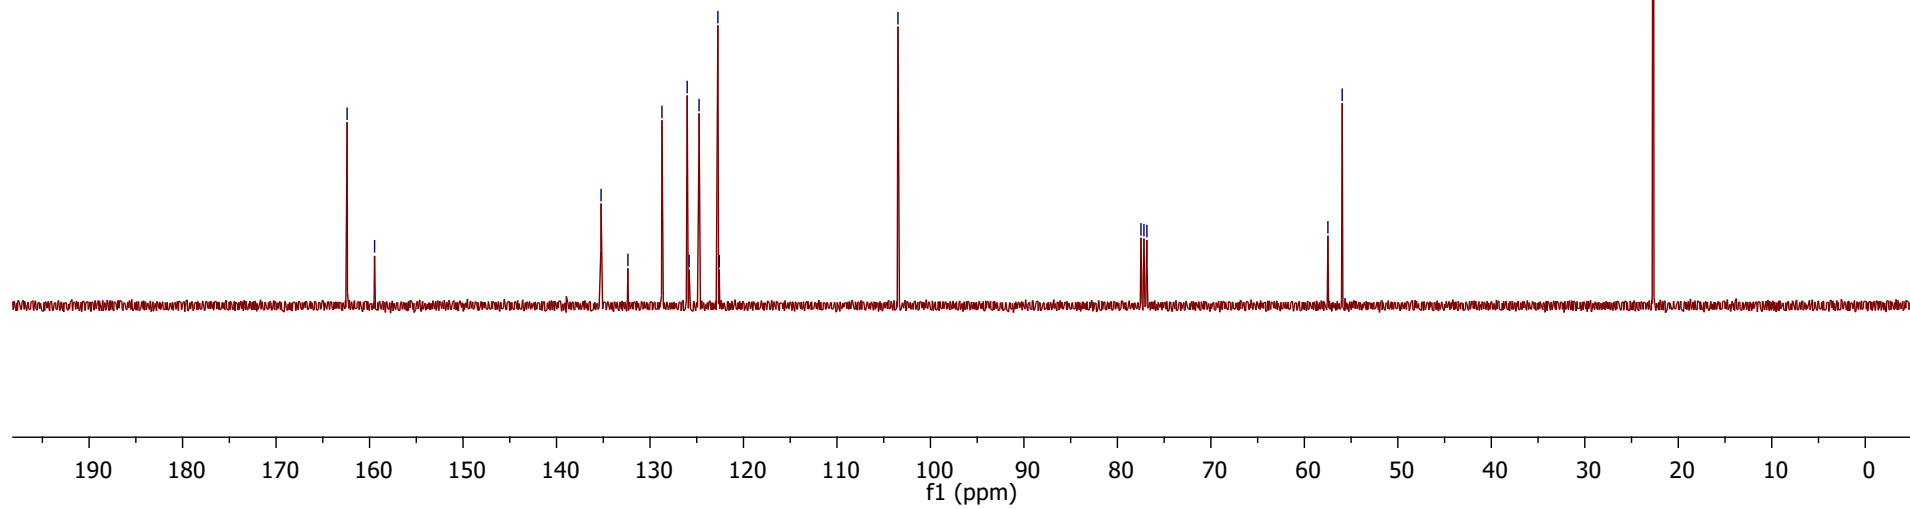

<sup>1</sup>H NMR (CDCl<sub>3</sub>, 400 MHz) **2n**

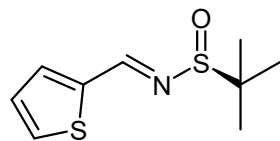

8.6713  
7.5932  
7.5908  
7.5805  
7.5789  
7.5384  
7.5356  
7.5296  
7.5287  
7.2603  
7.1538  
7.1527  
7.1443  
7.1413  
7.1340  
7.1316  
1.2436

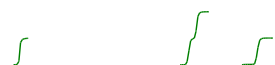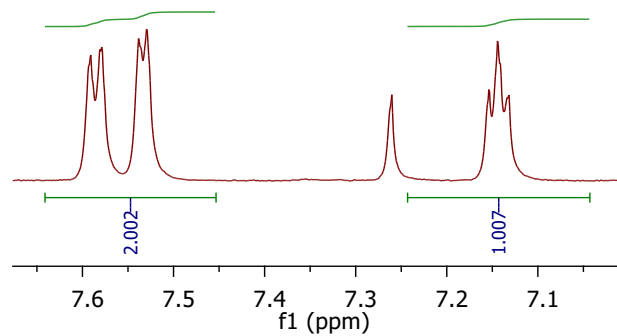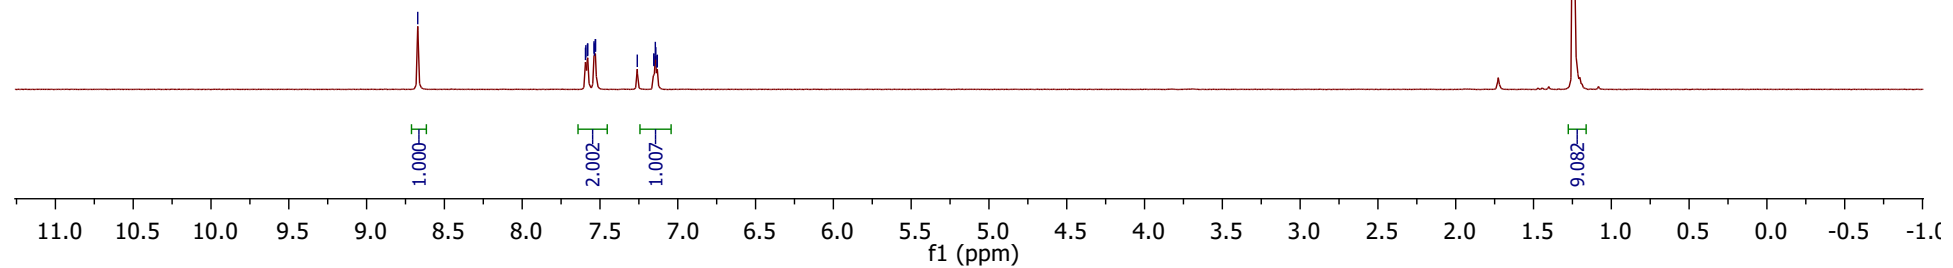

<sup>1</sup>H NMR (CDCl<sub>3</sub>, 400 MHz) **2o**

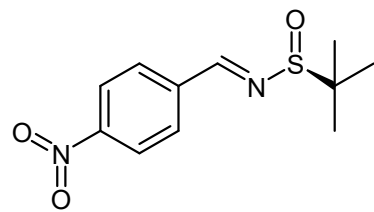

— 8.6707  
— 8.3474  
— 8.3259  
— 8.0359  
— 8.0145  
— 7.2605  
— 1.2899

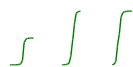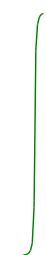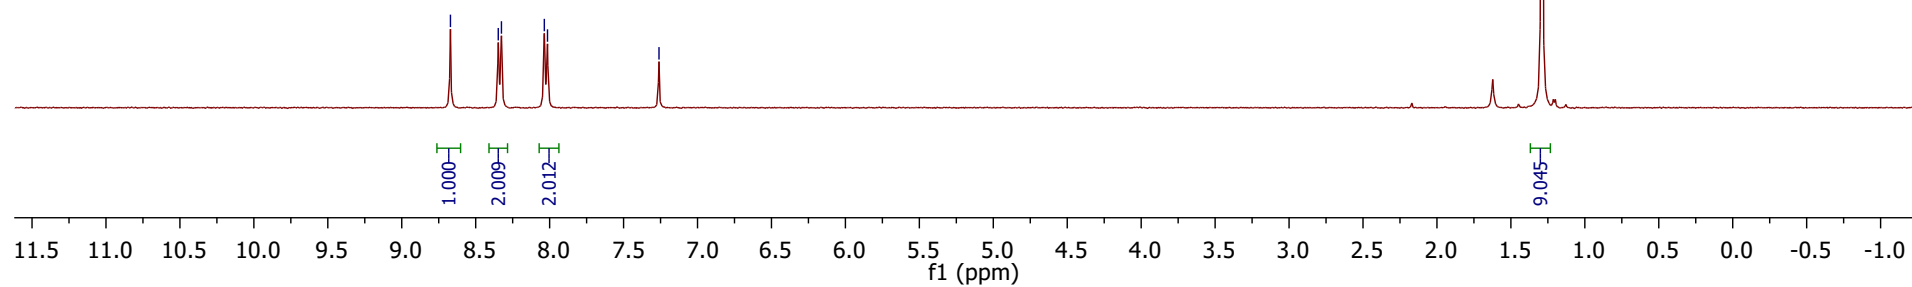

<sup>1</sup>H NMR (CDCl<sub>3</sub>, 400 MHz) **2p**

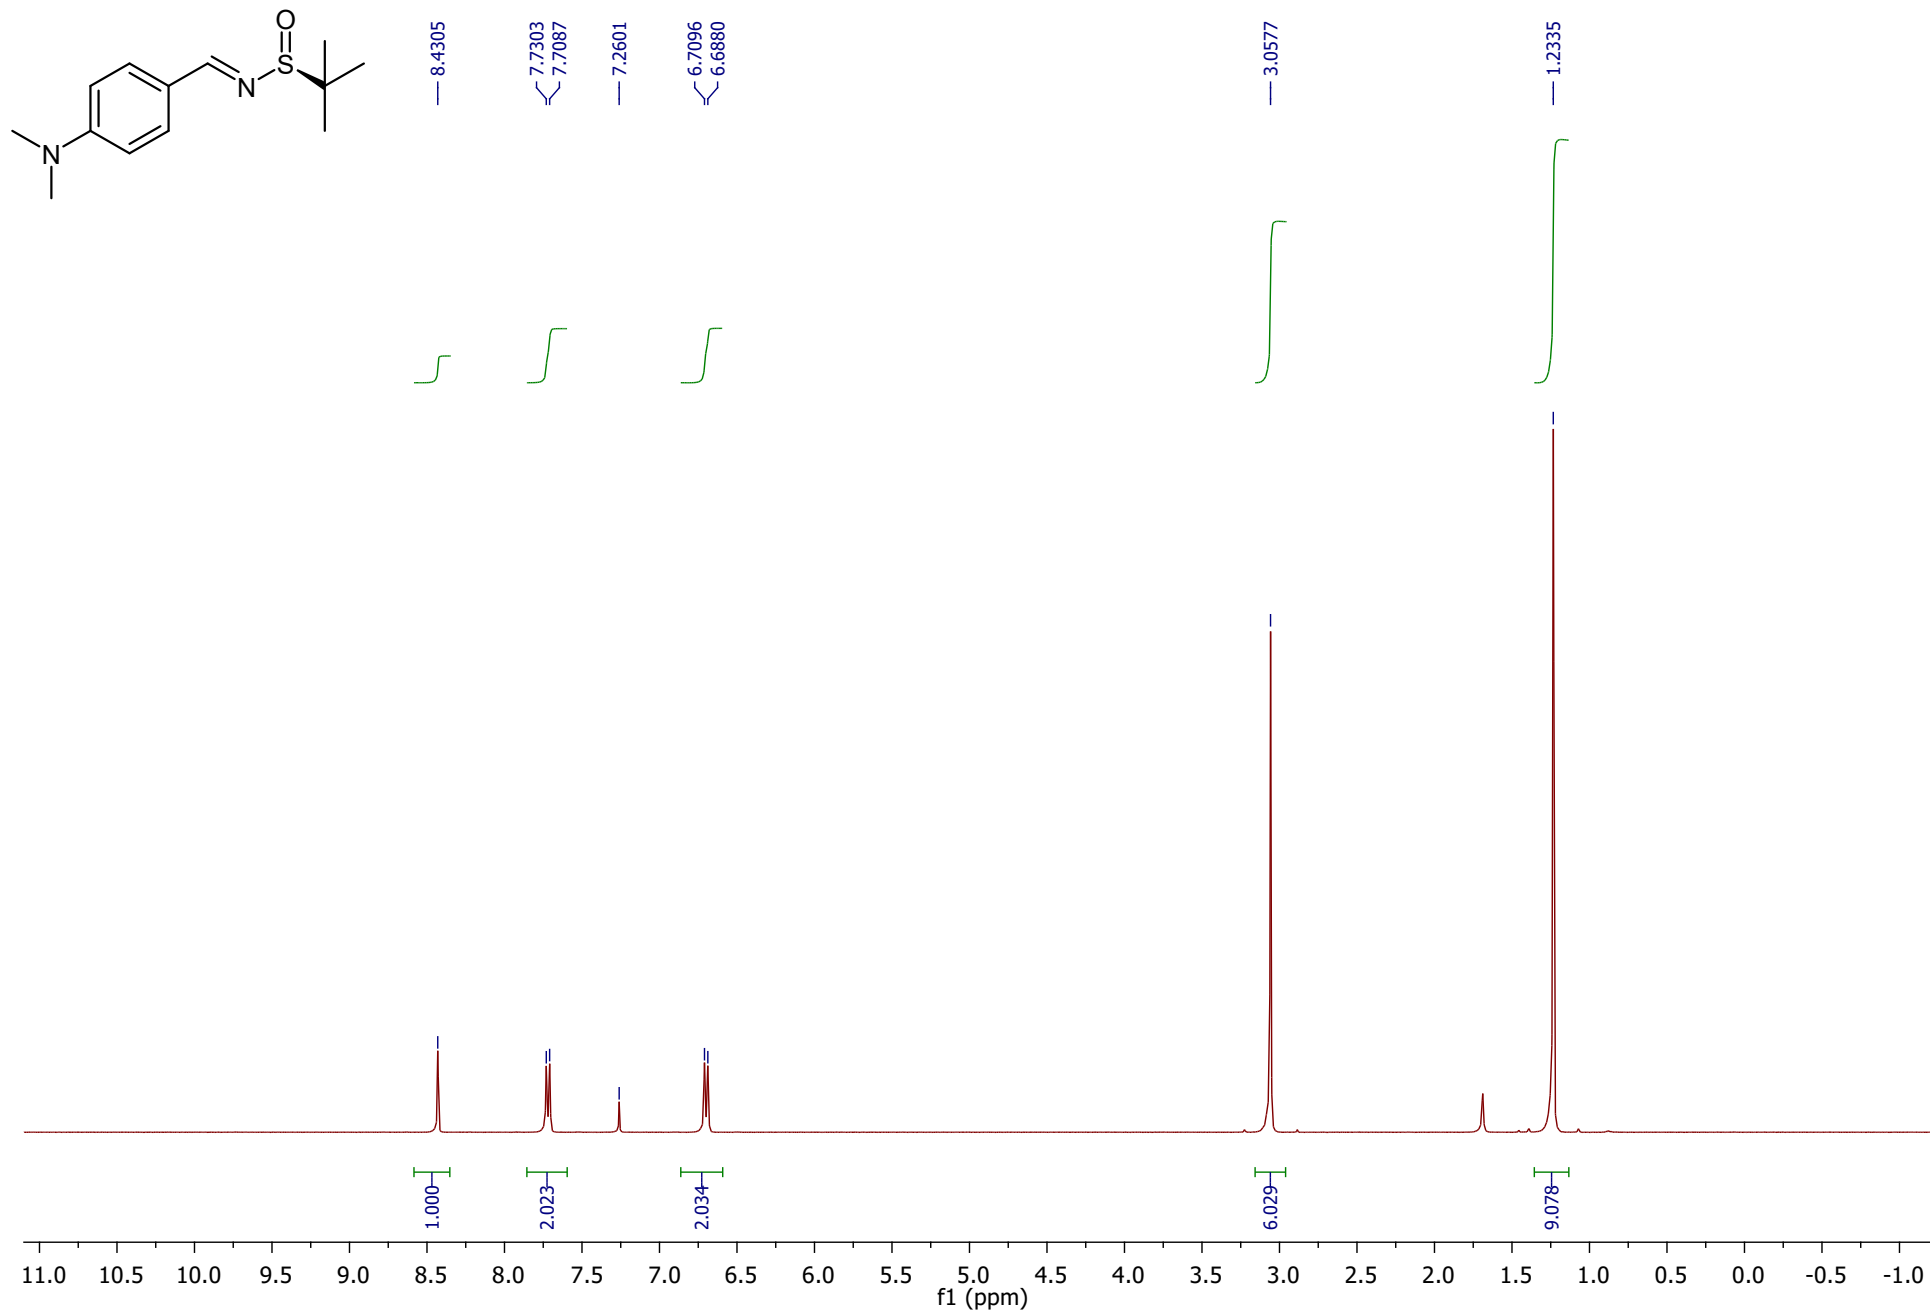

<sup>1</sup>H NMR (CDCl<sub>3</sub>, 400 MHz) **2q**

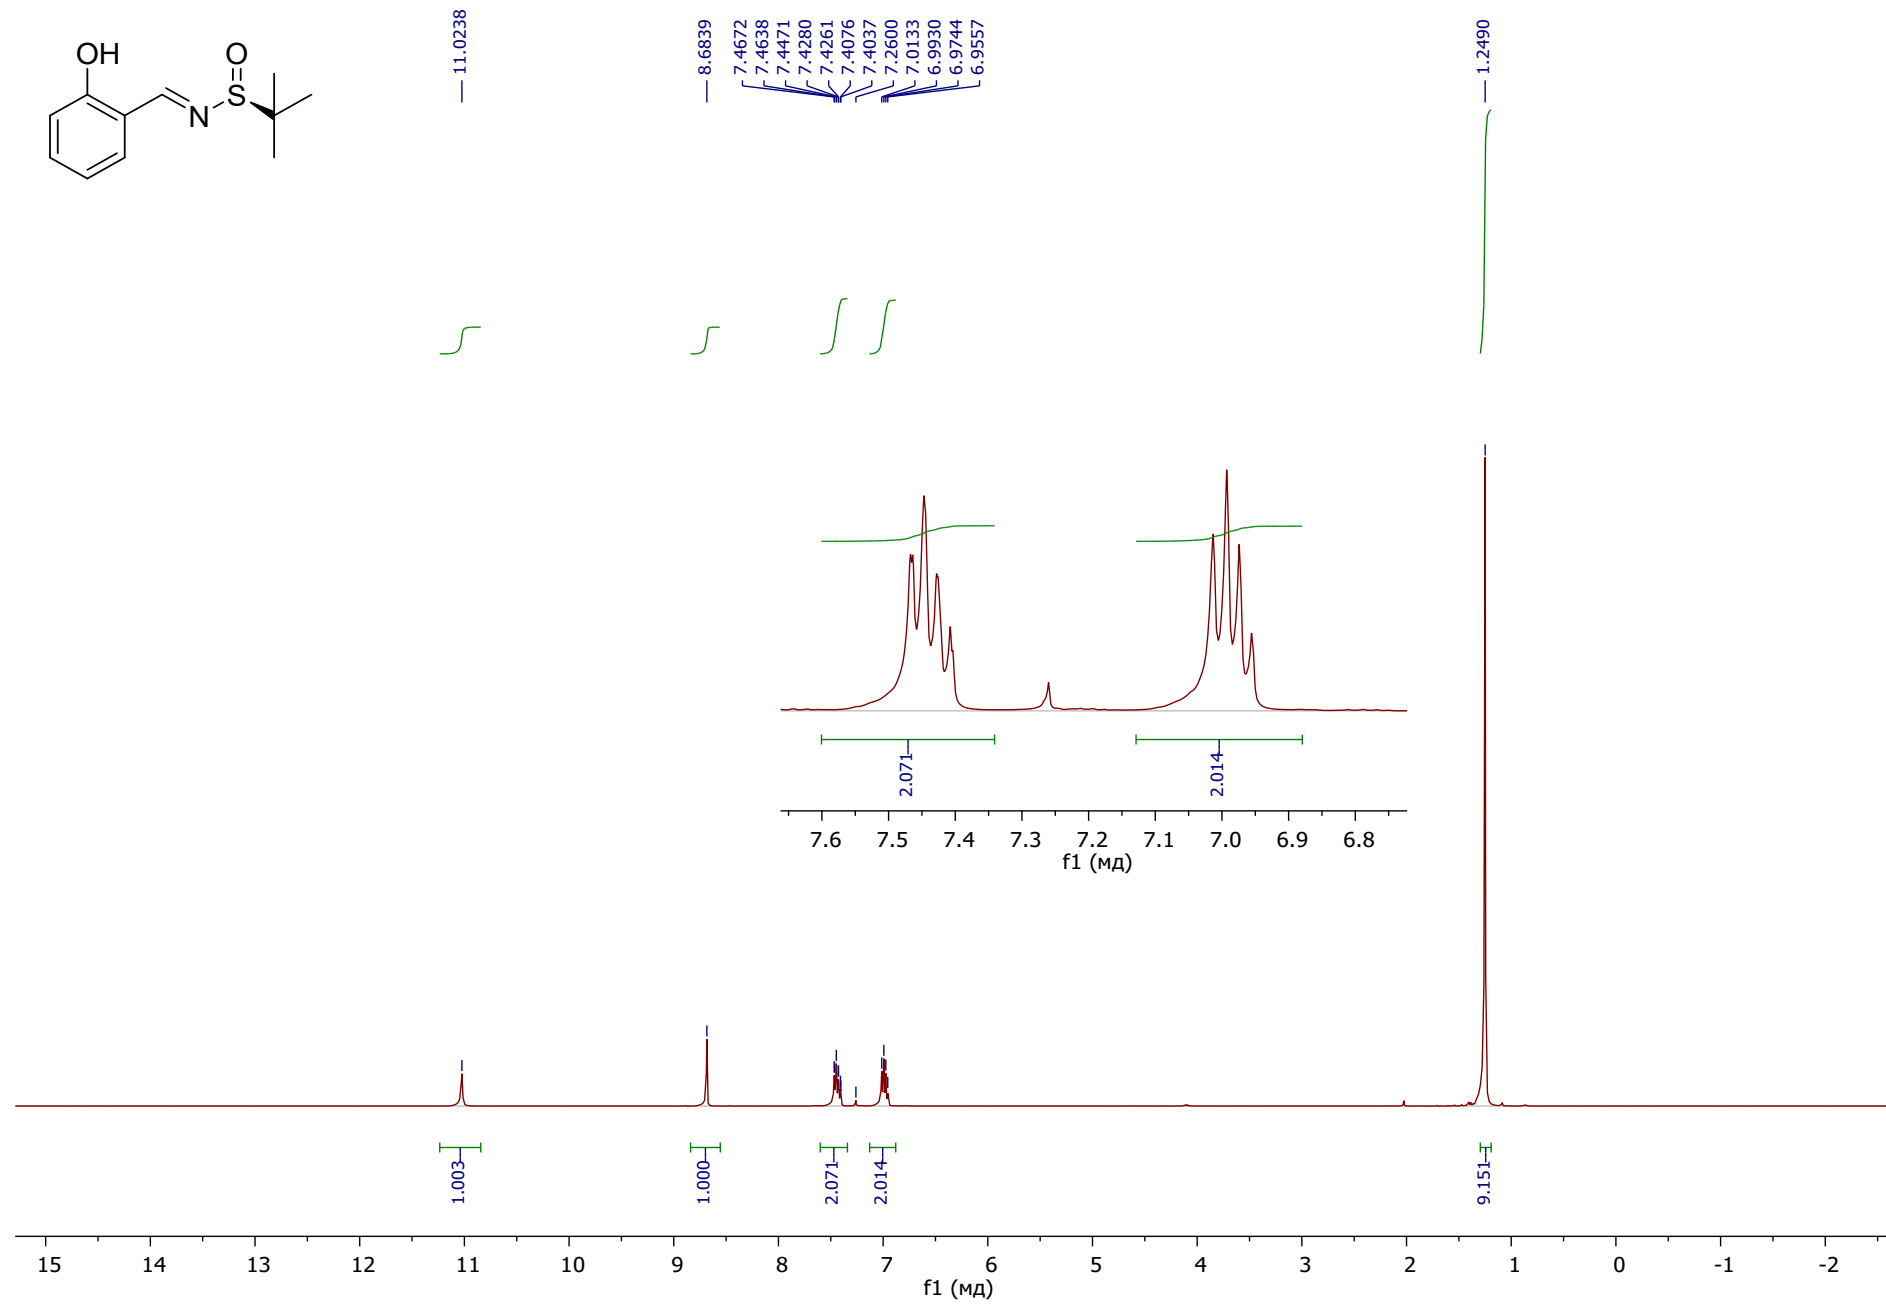

<sup>1</sup>H NMR (CDCl<sub>3</sub>, 400 MHz) **2r**

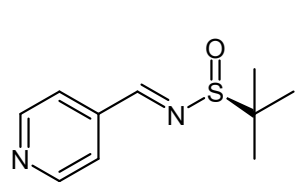

8.7746  
8.7709  
8.7635  
8.7603  
8.5664

∫ ∫

7.6758  
7.6717  
7.6647  
7.6615  
7.2603  
7.2603

∫

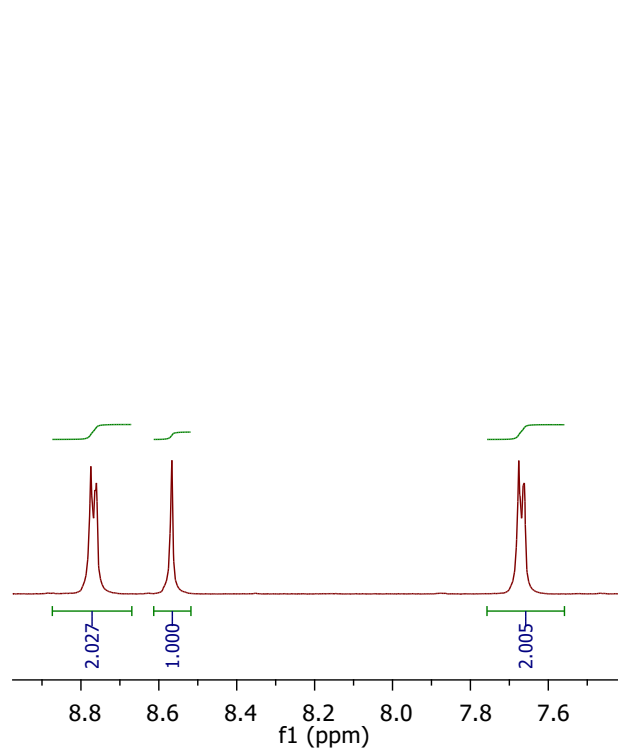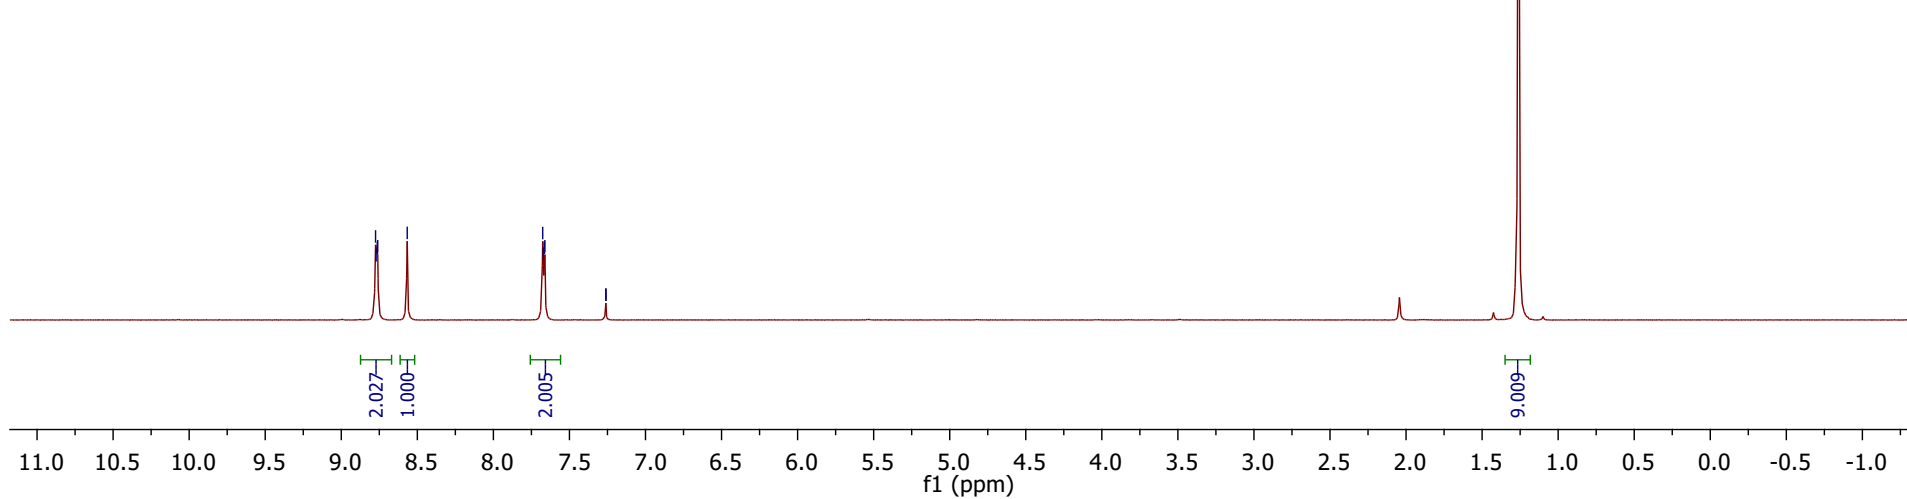

$^{13}\text{C}$  NMR ( $\text{CDCl}_3$ , 101 MHz) **2r**

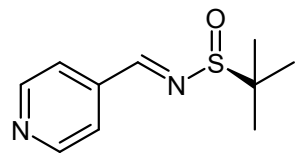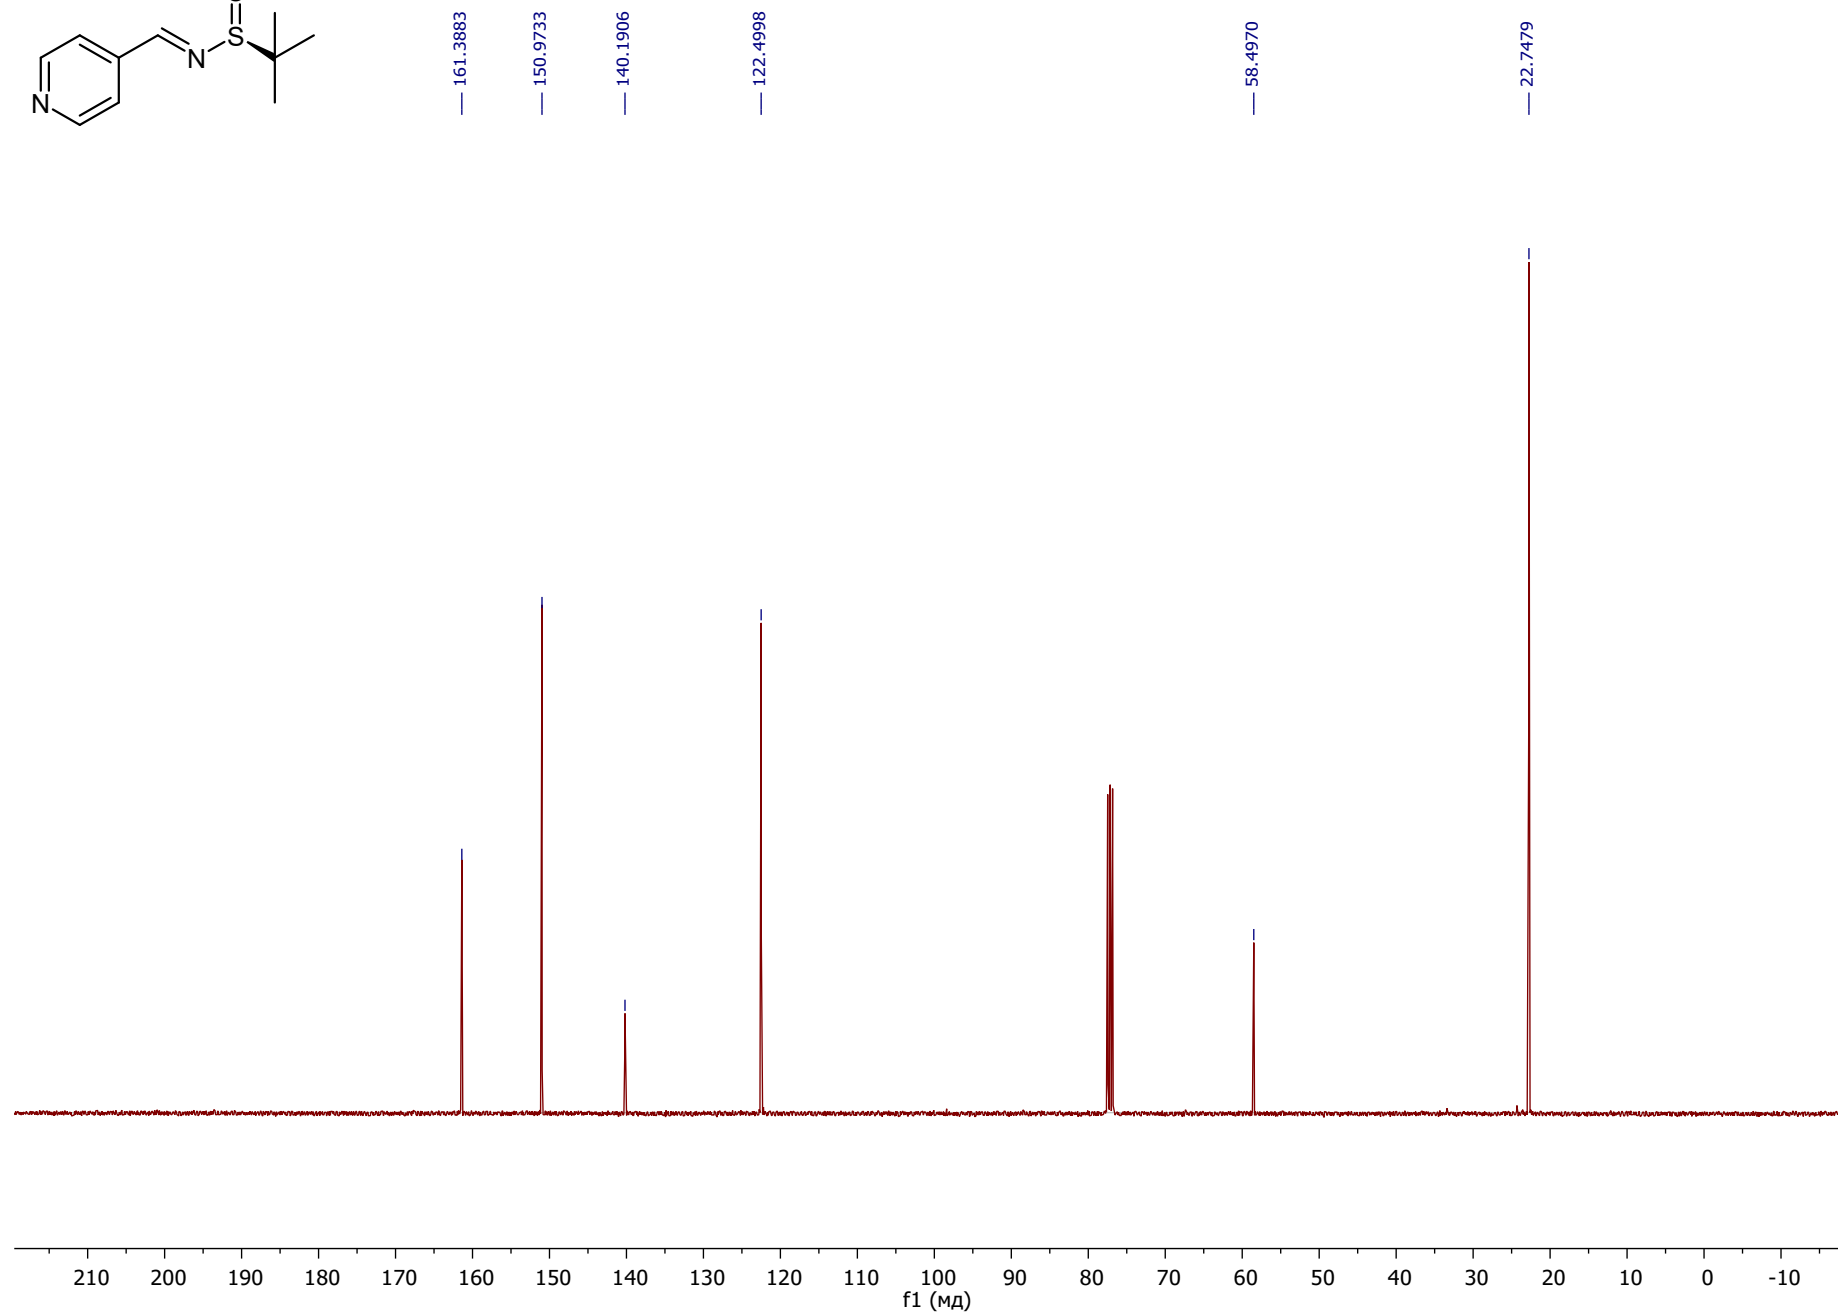

$^1\text{H}$  NMR ( $\text{CDCl}_3$ , 400 MHz) **2s**

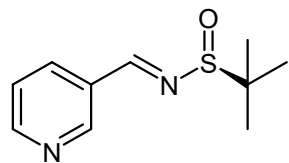

8.9597  
8.9565  
8.6732  
8.6694  
8.6612  
8.6574  
8.5752  
8.1169  
8.1128  
8.0971  
9.9588  
7.3667  
7.3592  
7.3470  
7.2603

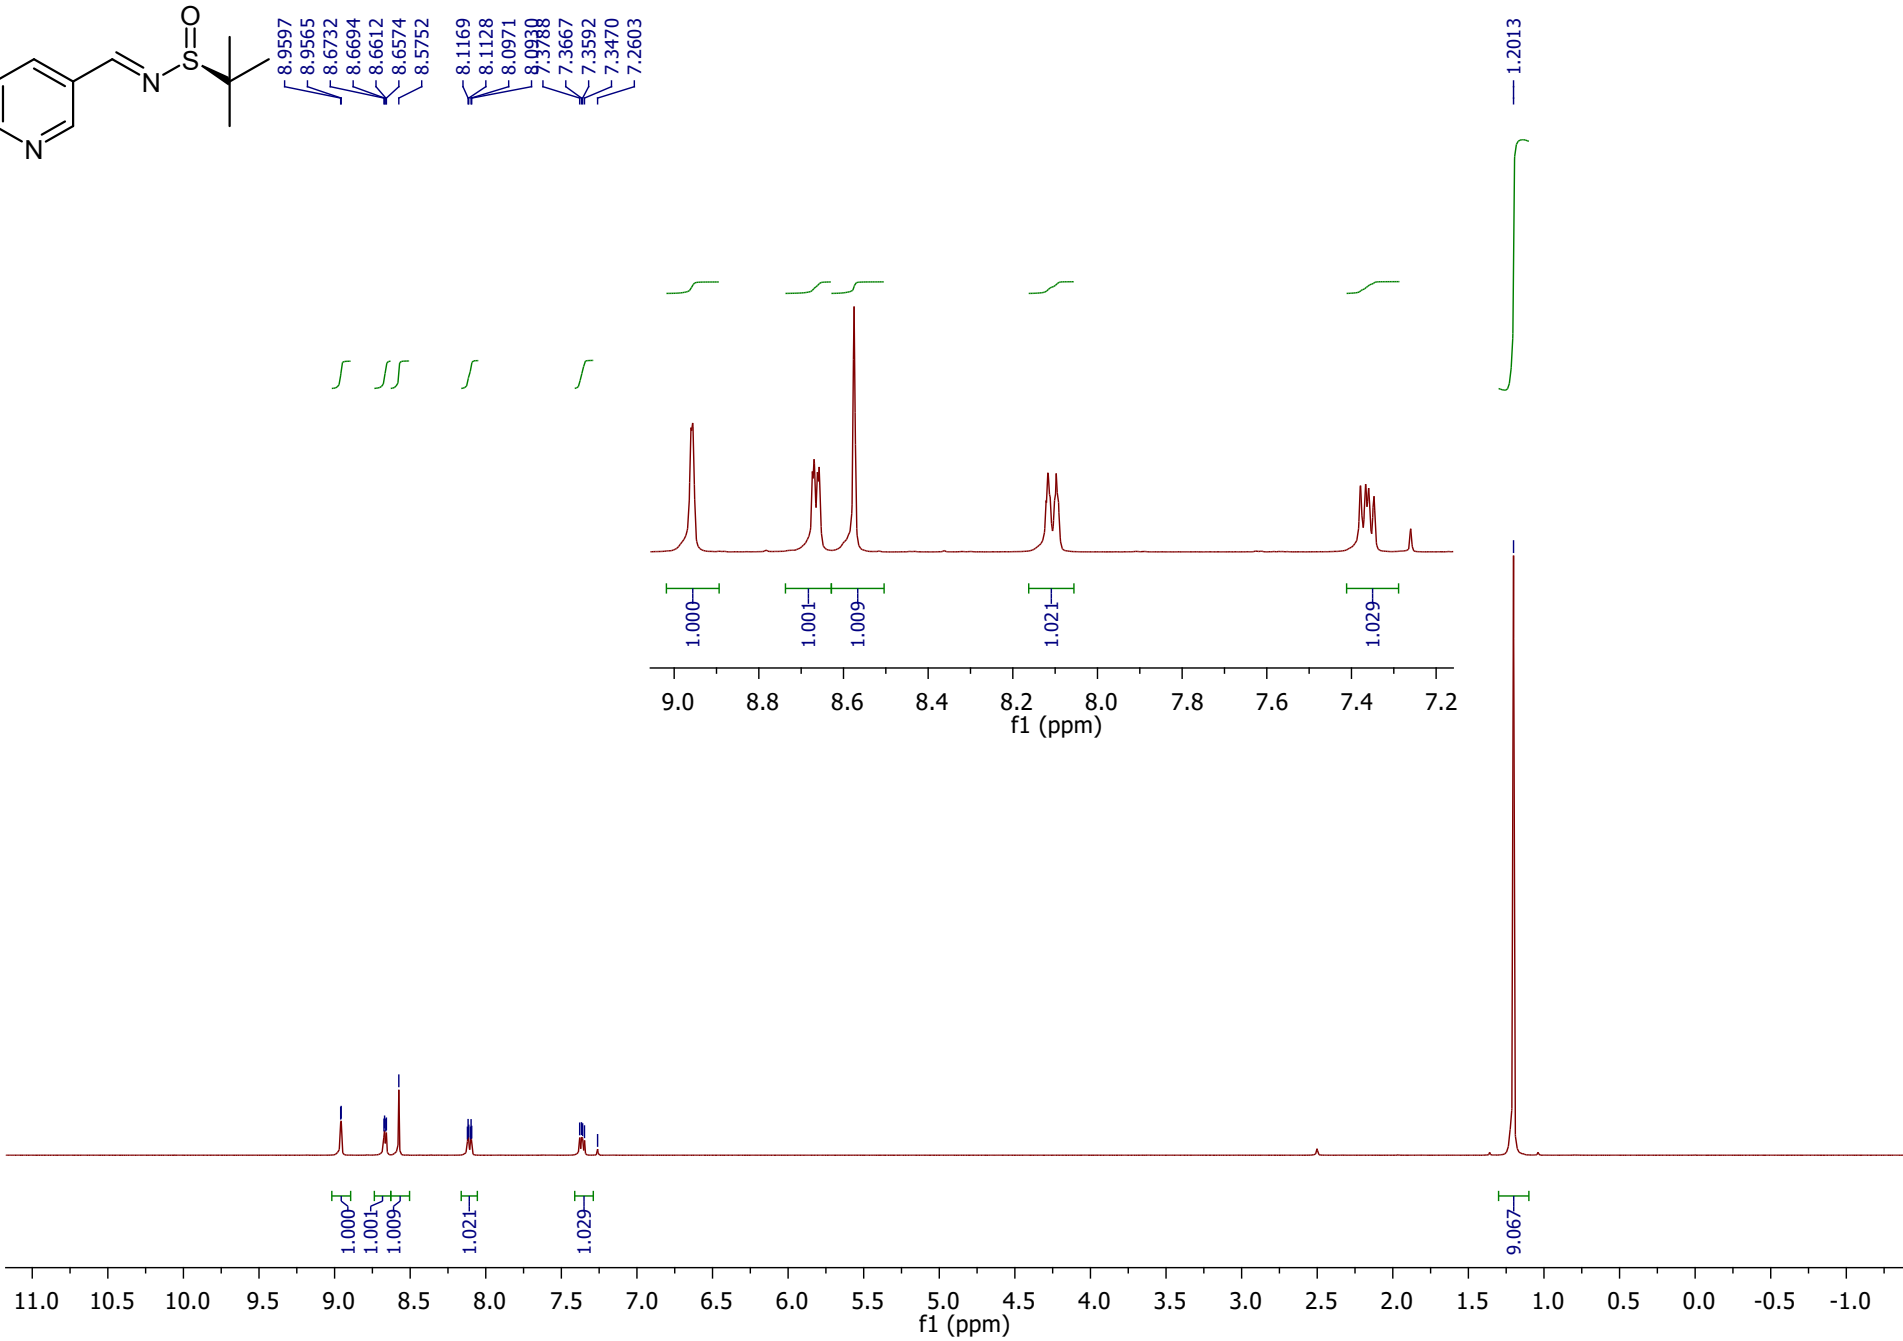



<sup>1</sup>H NMR (CDCl<sub>3</sub>, 400 MHz) **2t**

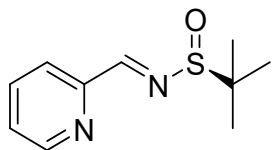

8.7230  
8.7122  
8.6683  
8.0016  
7.9820  
7.8134  
7.7942  
7.3815  
7.3789  
7.3734  
7.3608  
7.2599

1.2527

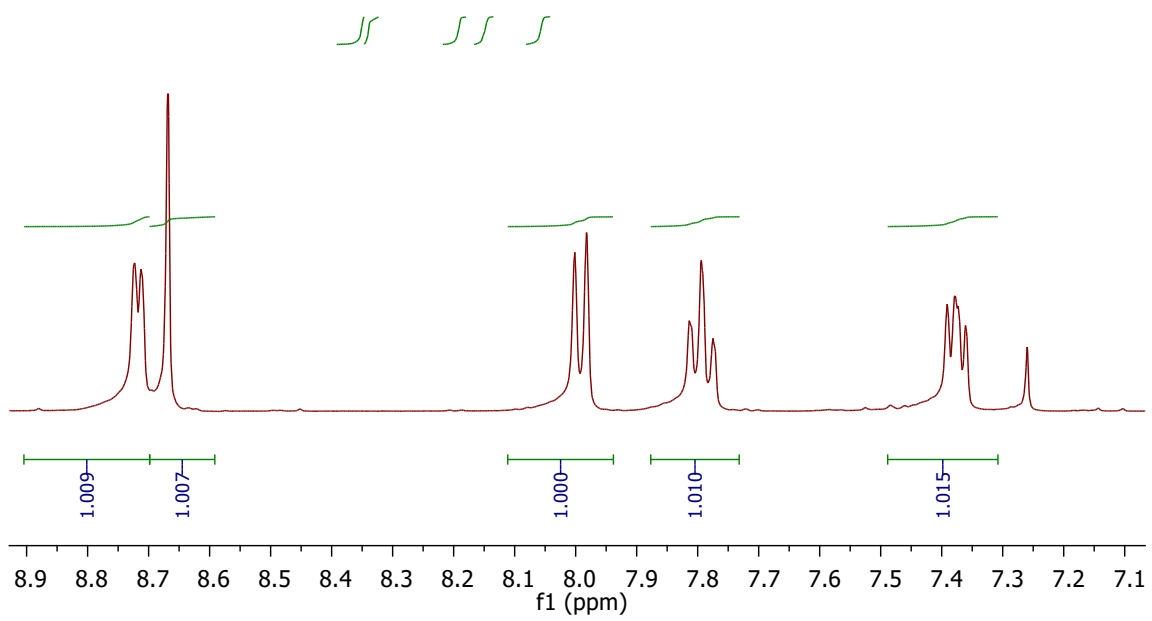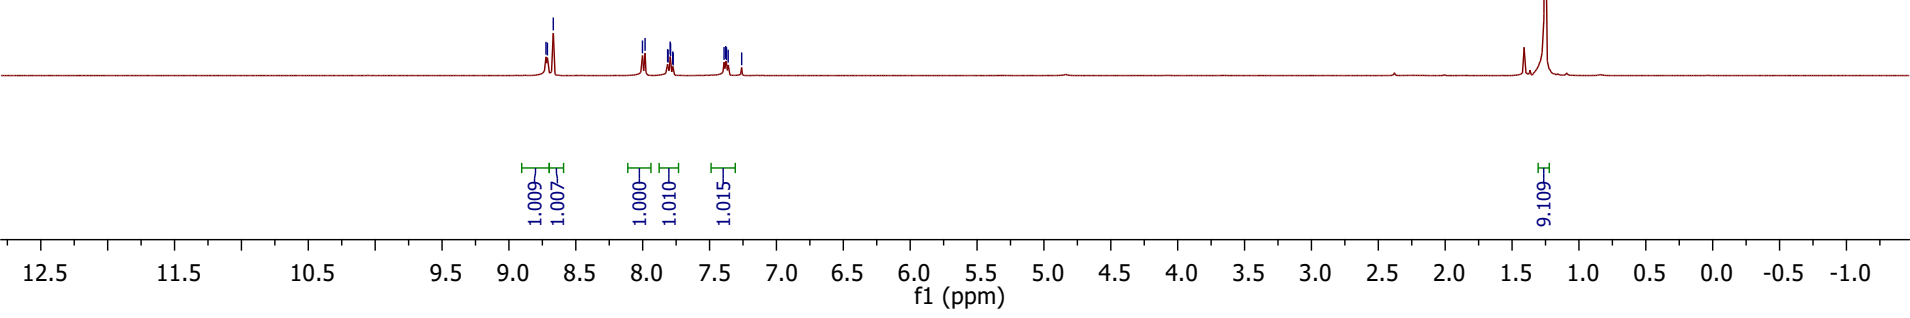

<sup>1</sup>H NMR (CDCl<sub>3</sub>, 400 MHz) **2u**

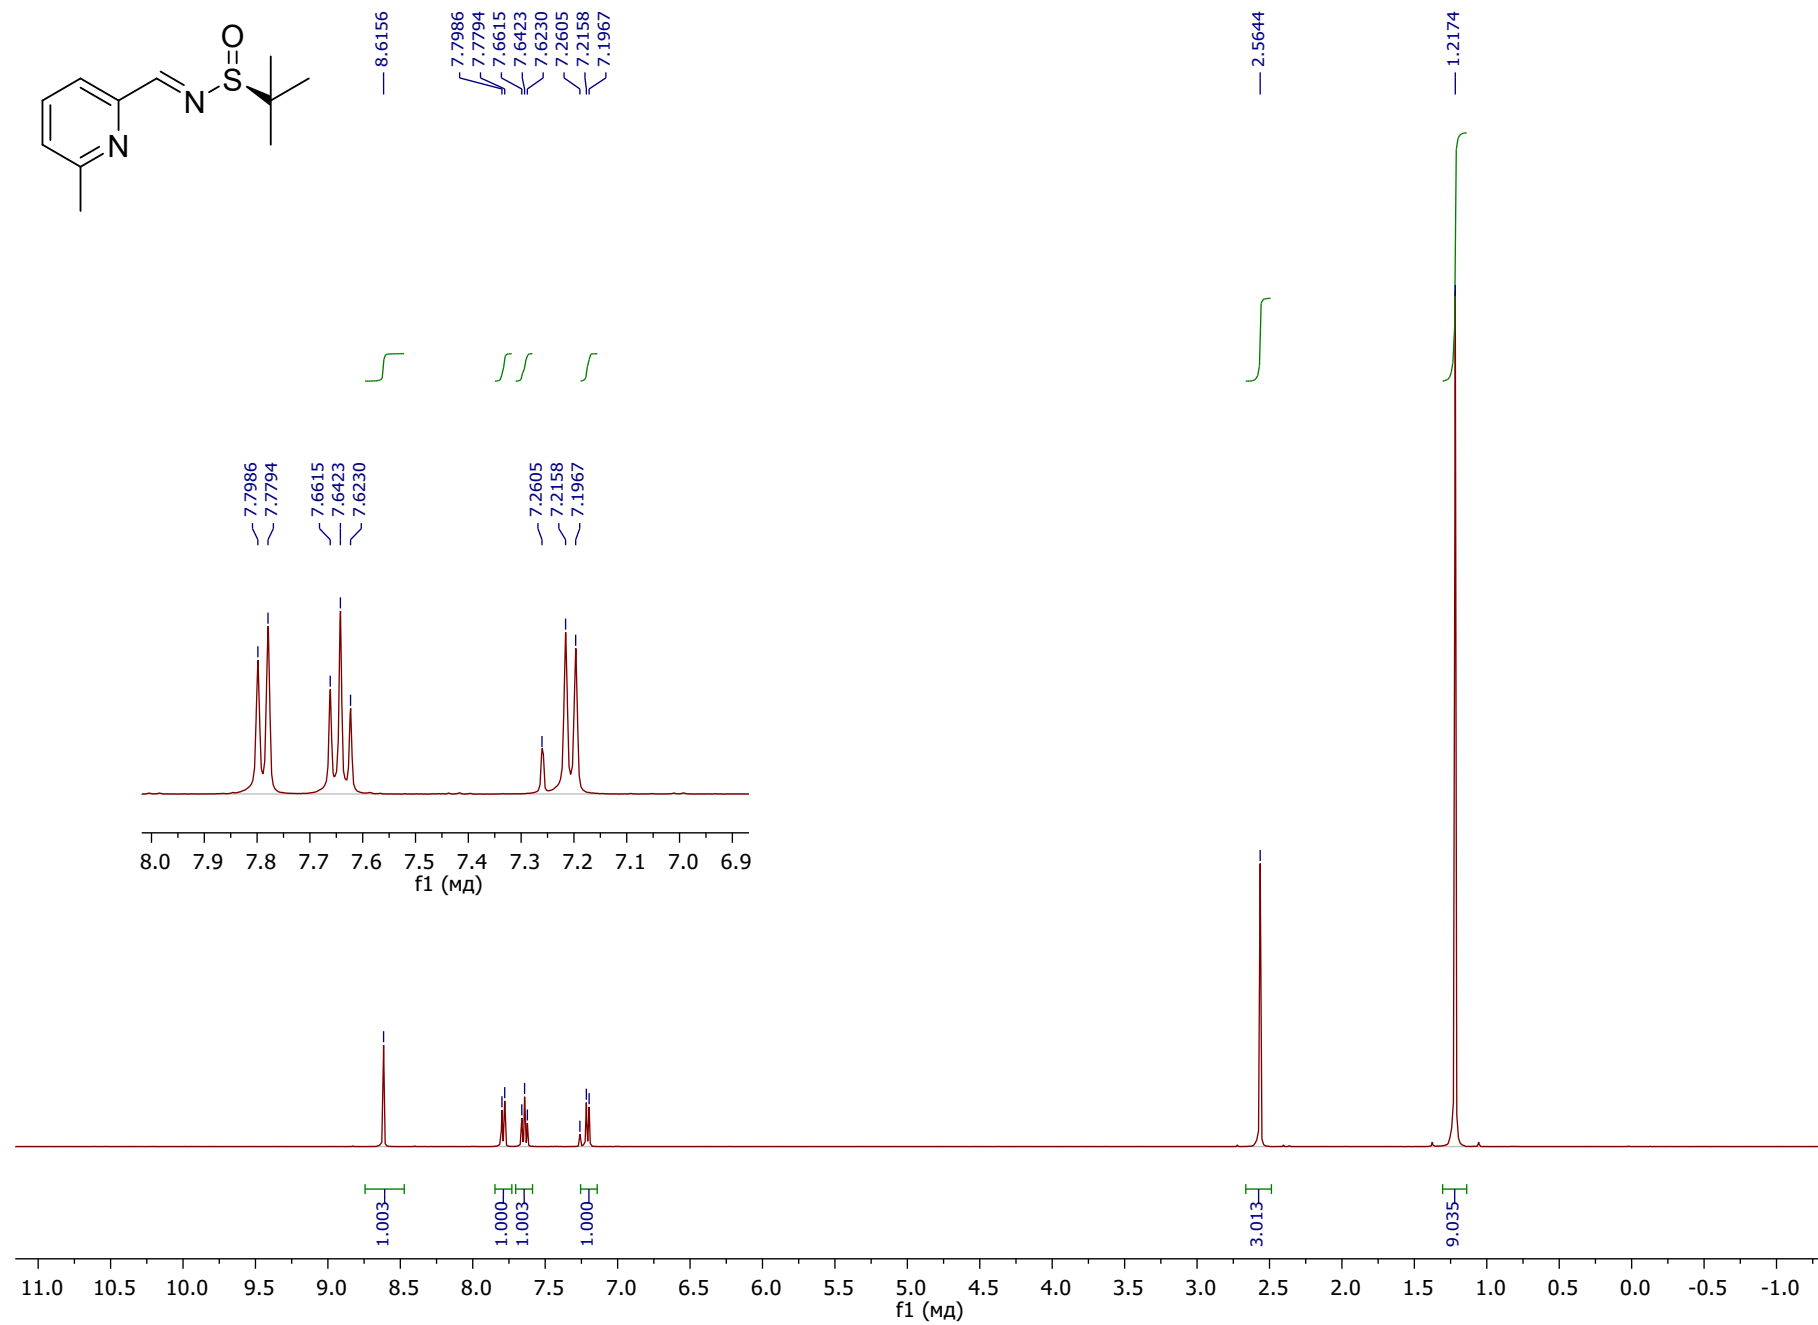

$^{13}\text{C}$  NMR ( $\text{CDCl}_3$ , 101 MHz) **2u**

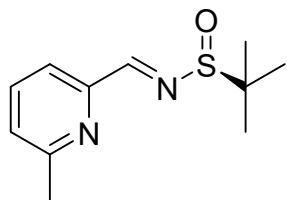

— 164.0411

— 159.0504

— 151.9434

— 136.9498

— 125.6925

— 120.0818

— 57.9970

— 24.4015

— 22.6985

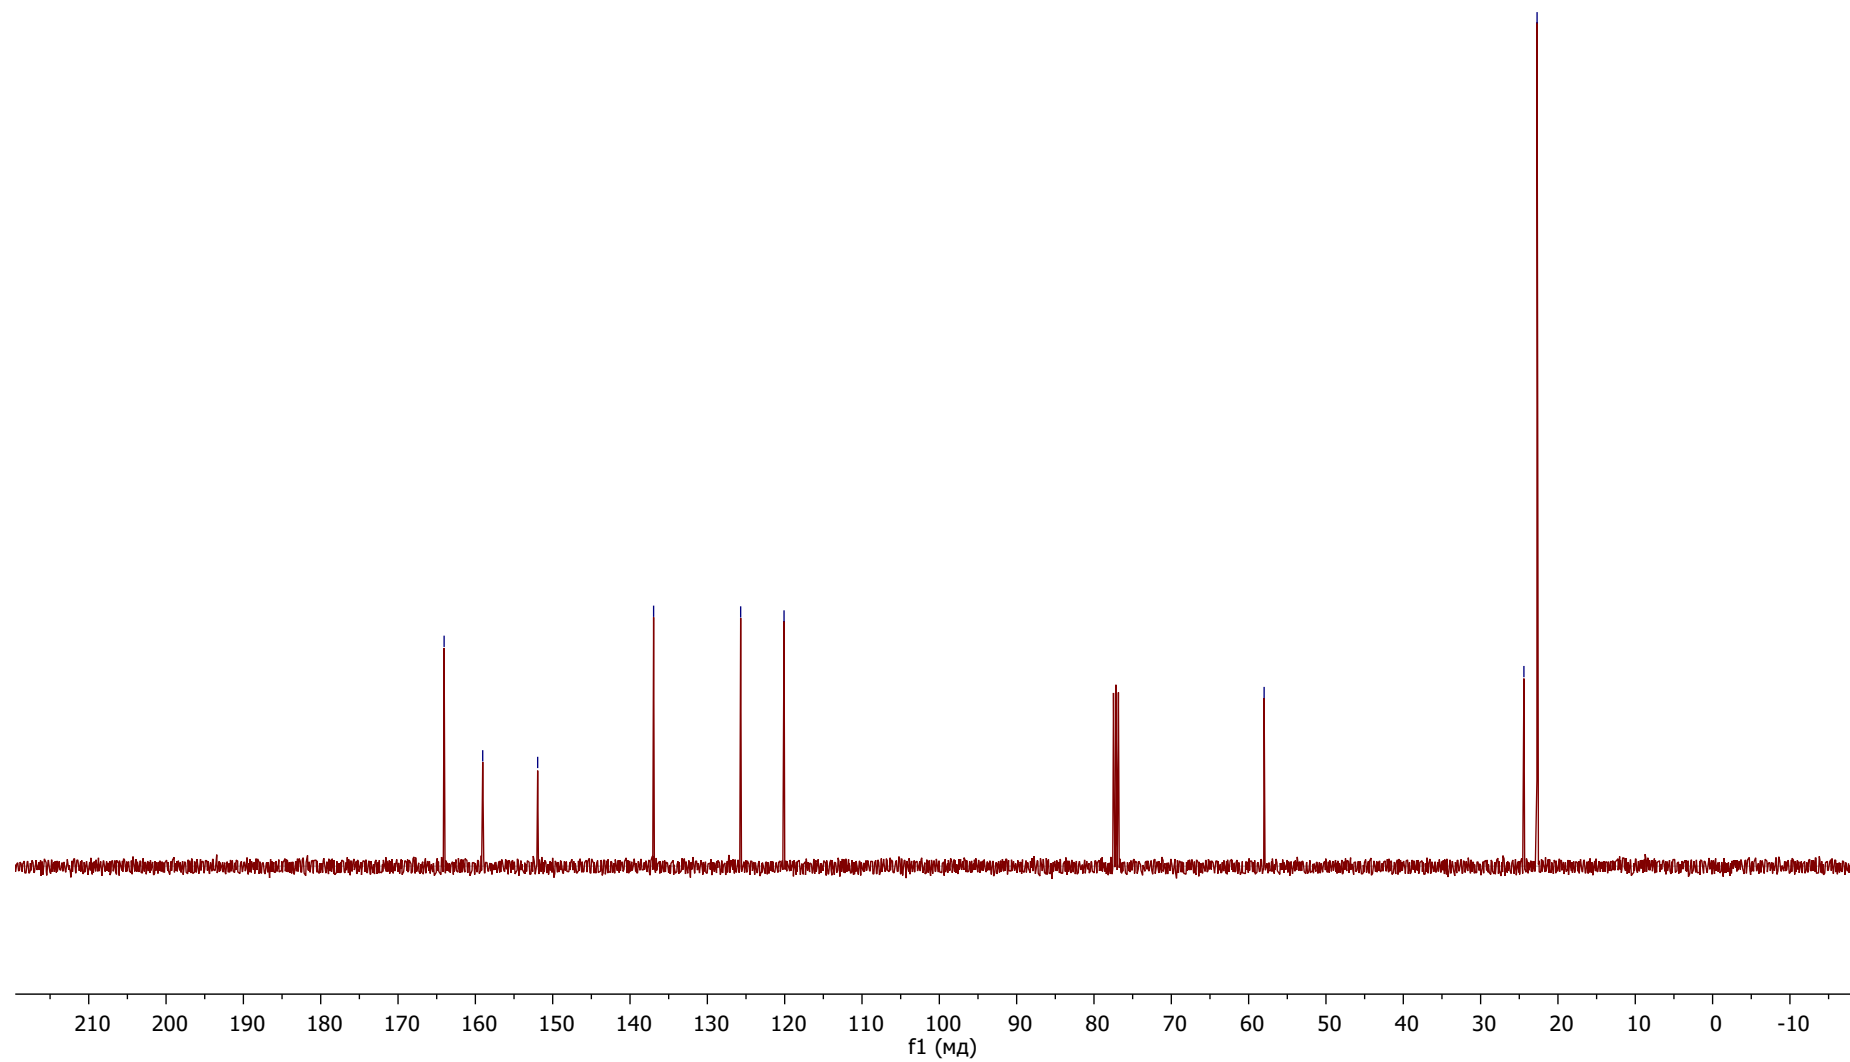

<sup>1</sup>H NMR (CDCl<sub>3</sub>, 400 MHz) **2v**

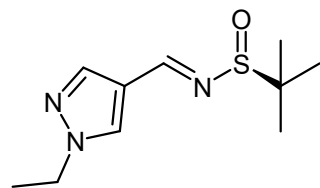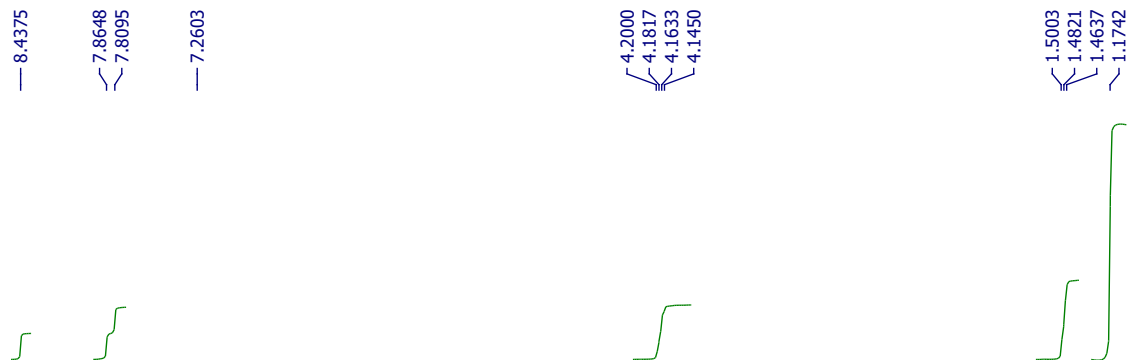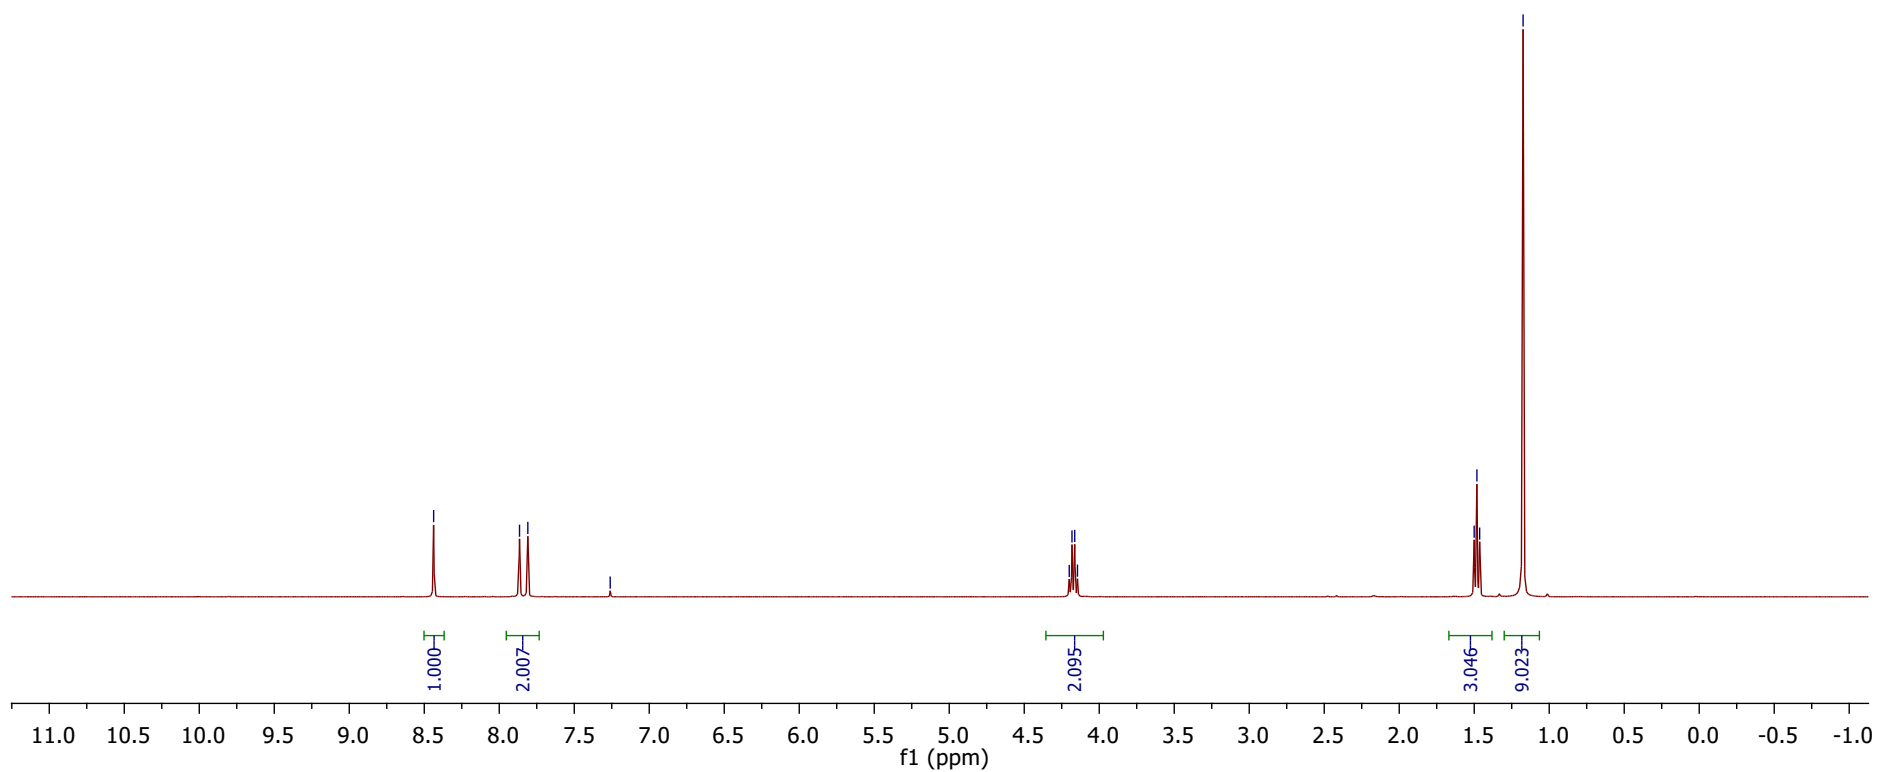

<sup>1</sup>H NMR (CDCl<sub>3</sub>, 400 MHz) **2w**

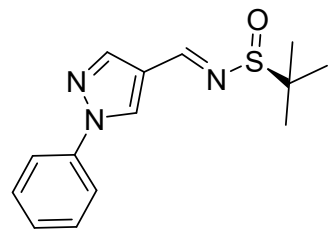

8.5718  
8.3290  
8.1143  
7.7217  
7.7005  
7.4971  
7.4783  
7.4577  
7.3663  
7.3479  
7.3294  
7.2600

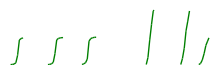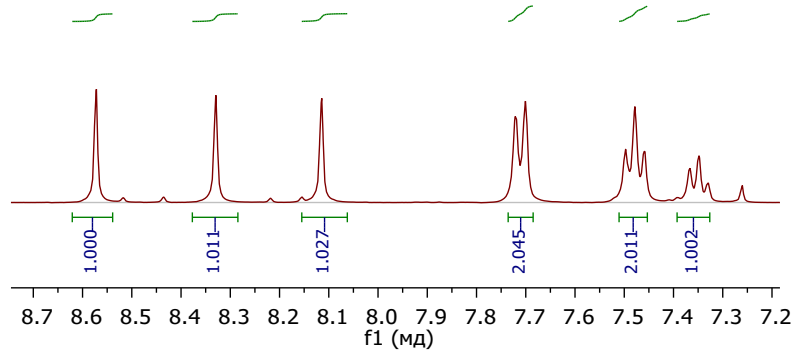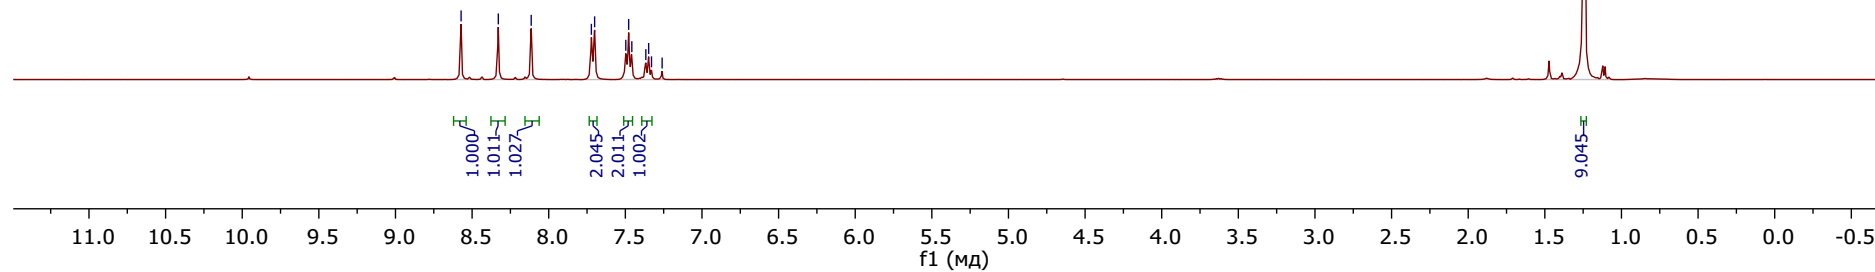

1.2428

$^1\text{H}$  NMR ( $\text{CDCl}_3$ , 400 MHz) **3a**

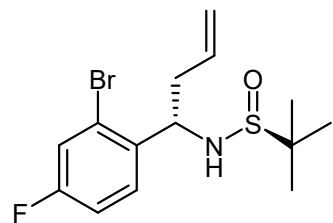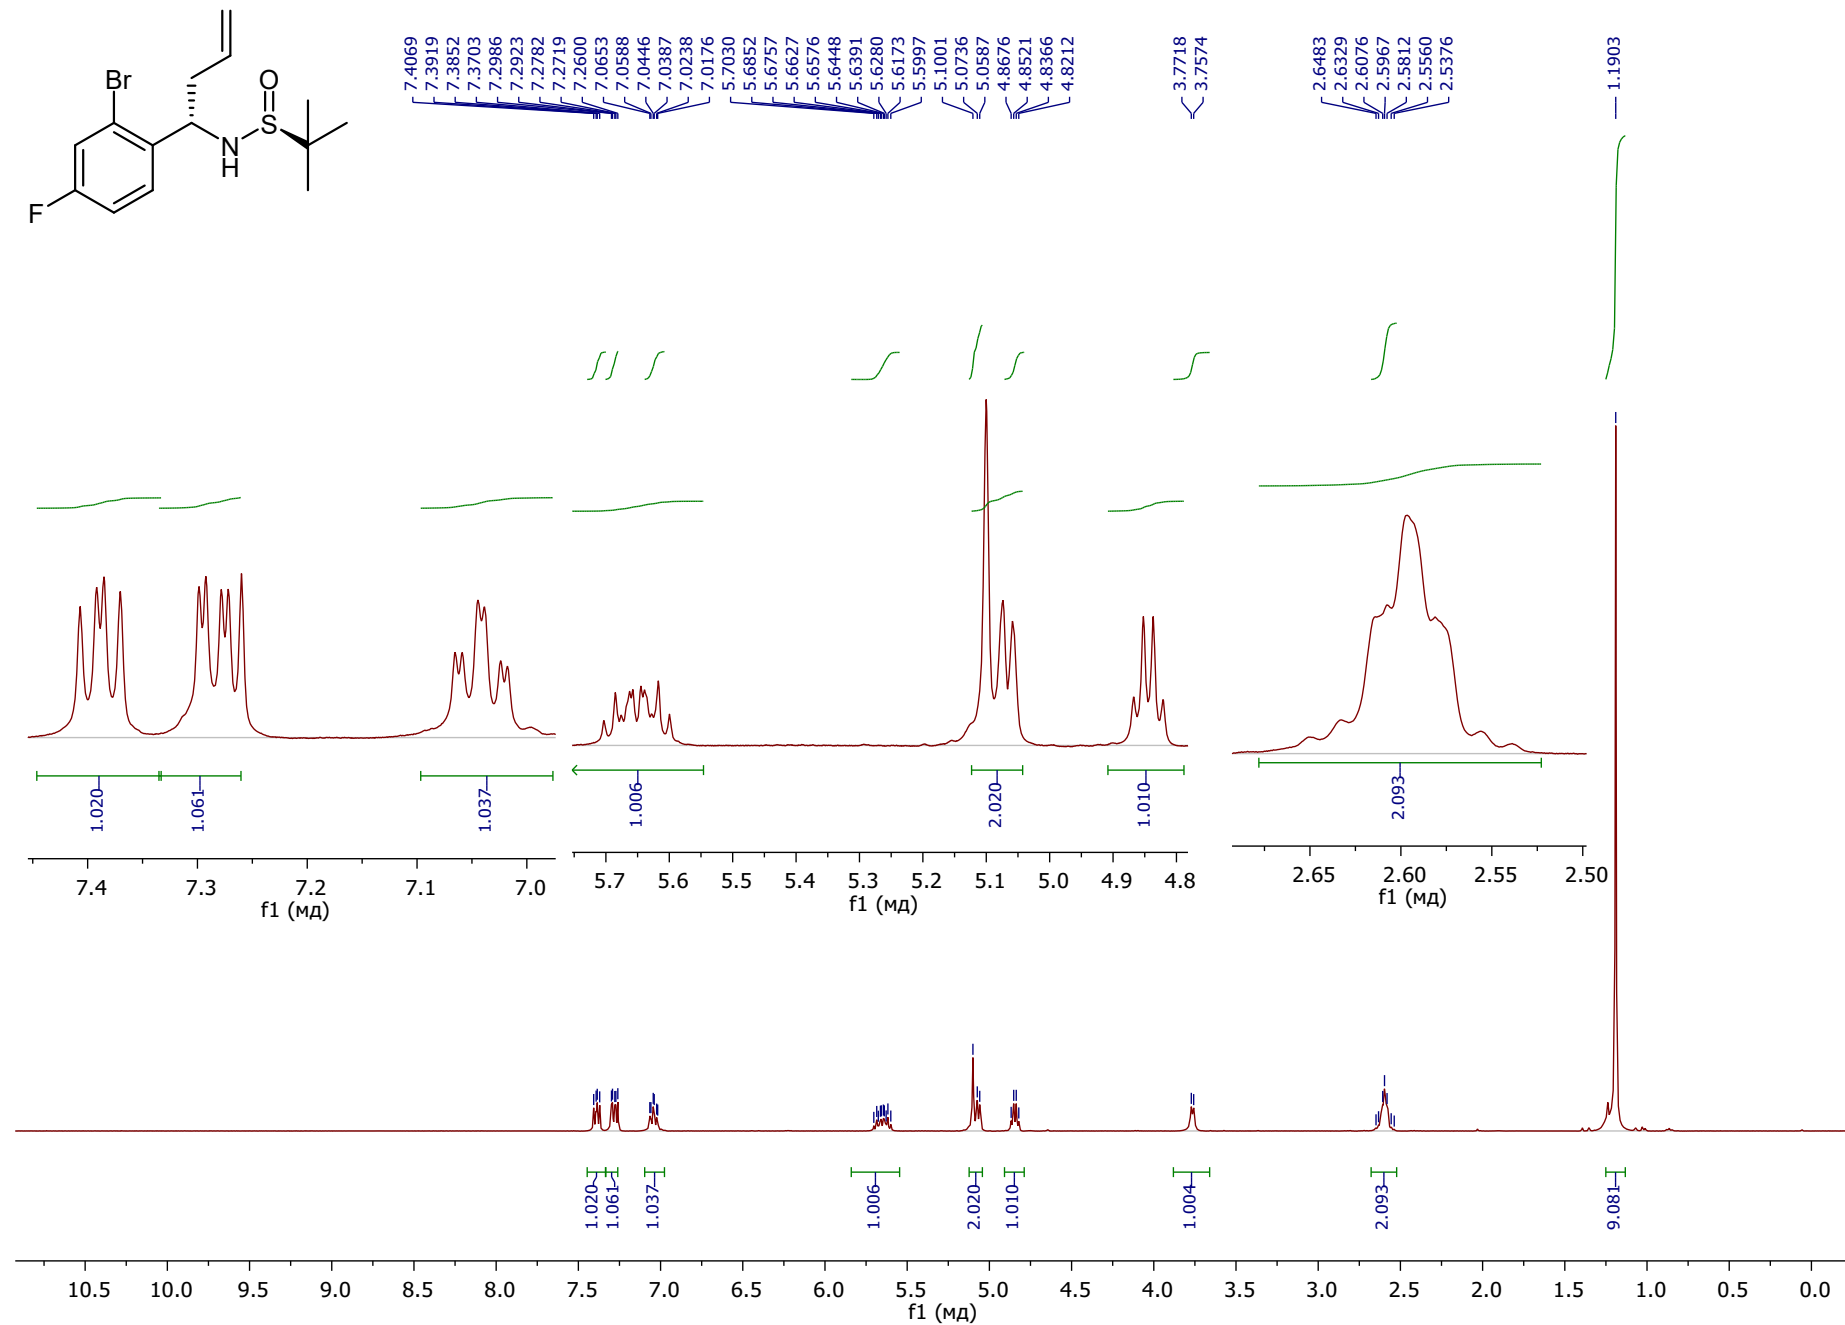

$^{13}\text{C}$  NMR (CDCl<sub>3</sub>, 101 MHz) **3a**

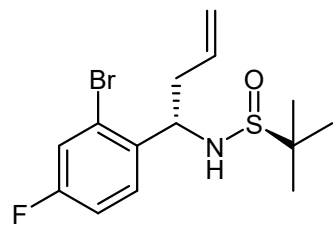

162.8357  
160.3424

136.9131  
136.8789  
133.2324  
129.8754  
129.7900  
123.3207  
123.2278  
120.4370  
120.1954  
119.1642  
115.0267  
114.8169

56.7987  
56.5252

40.5192

22.6755

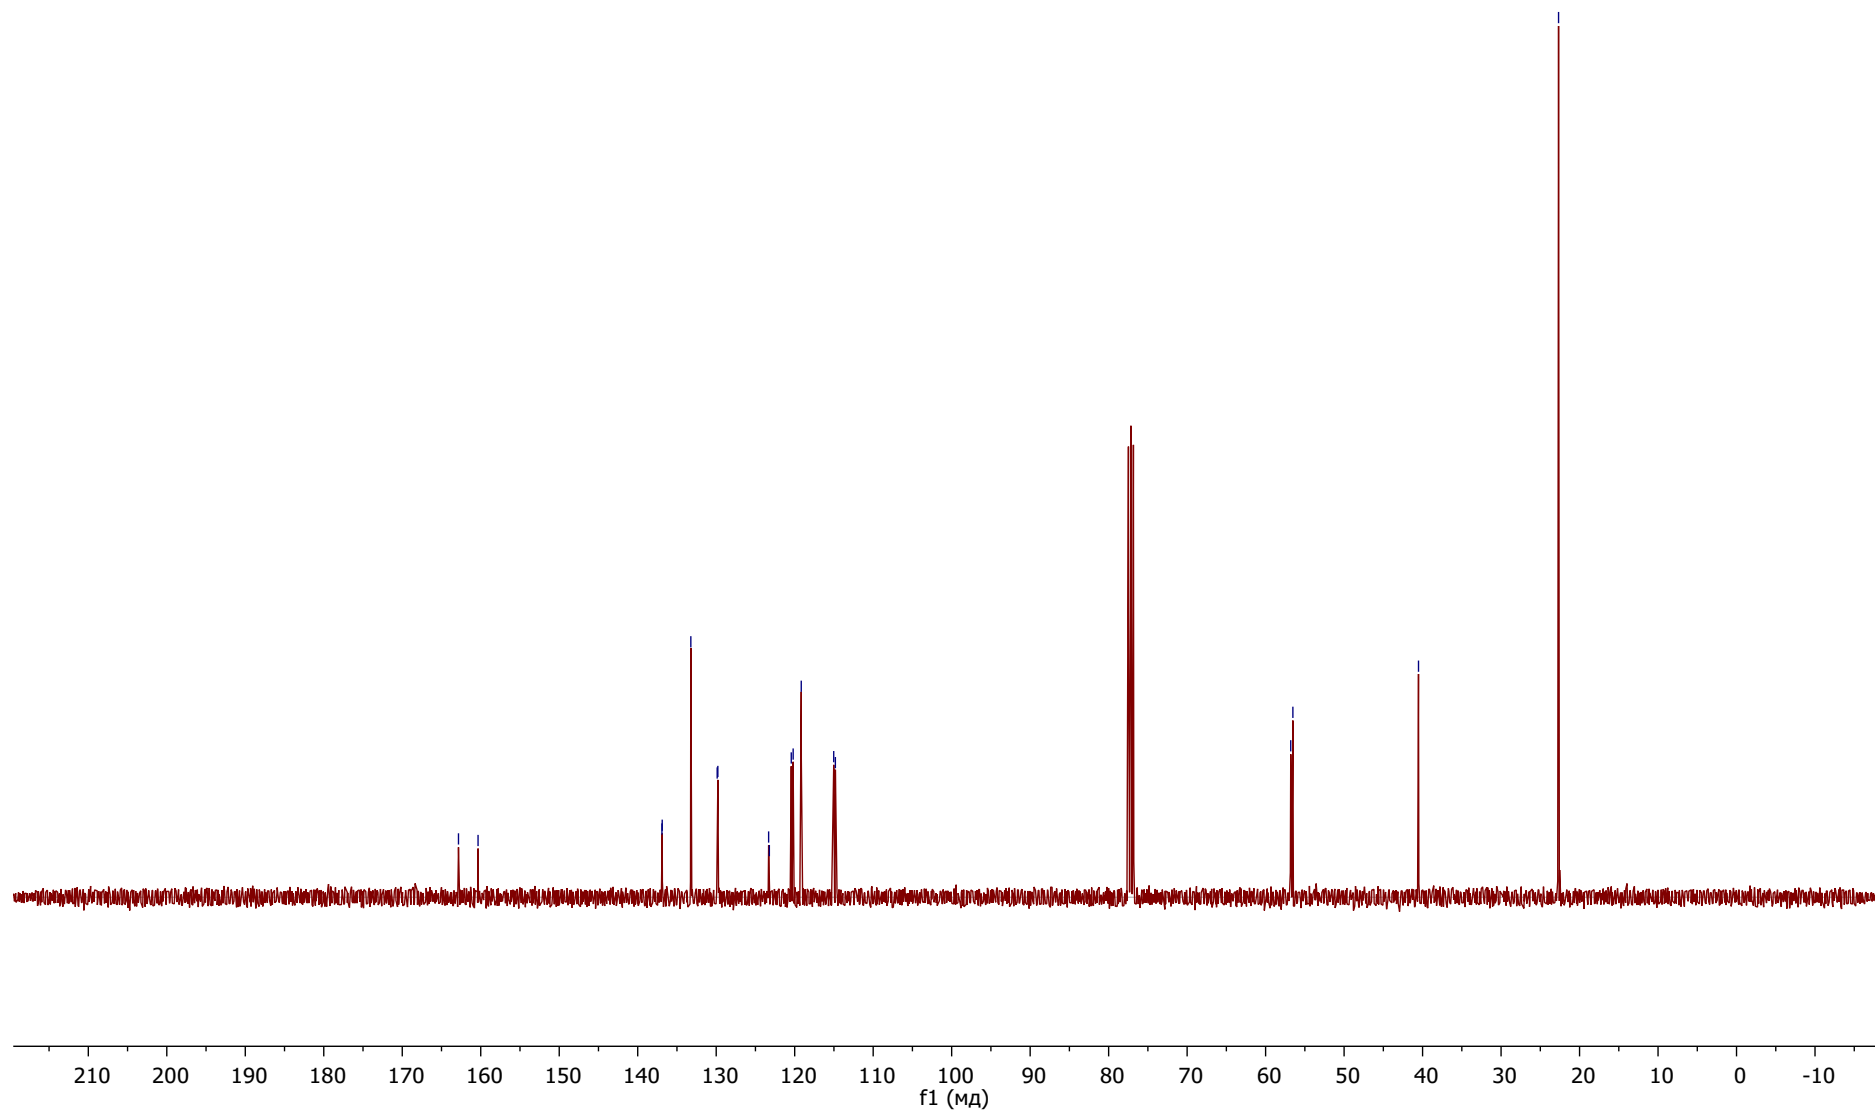

<sup>1</sup>H NMR (CDCl<sub>3</sub>, 400 MHz) **3b**

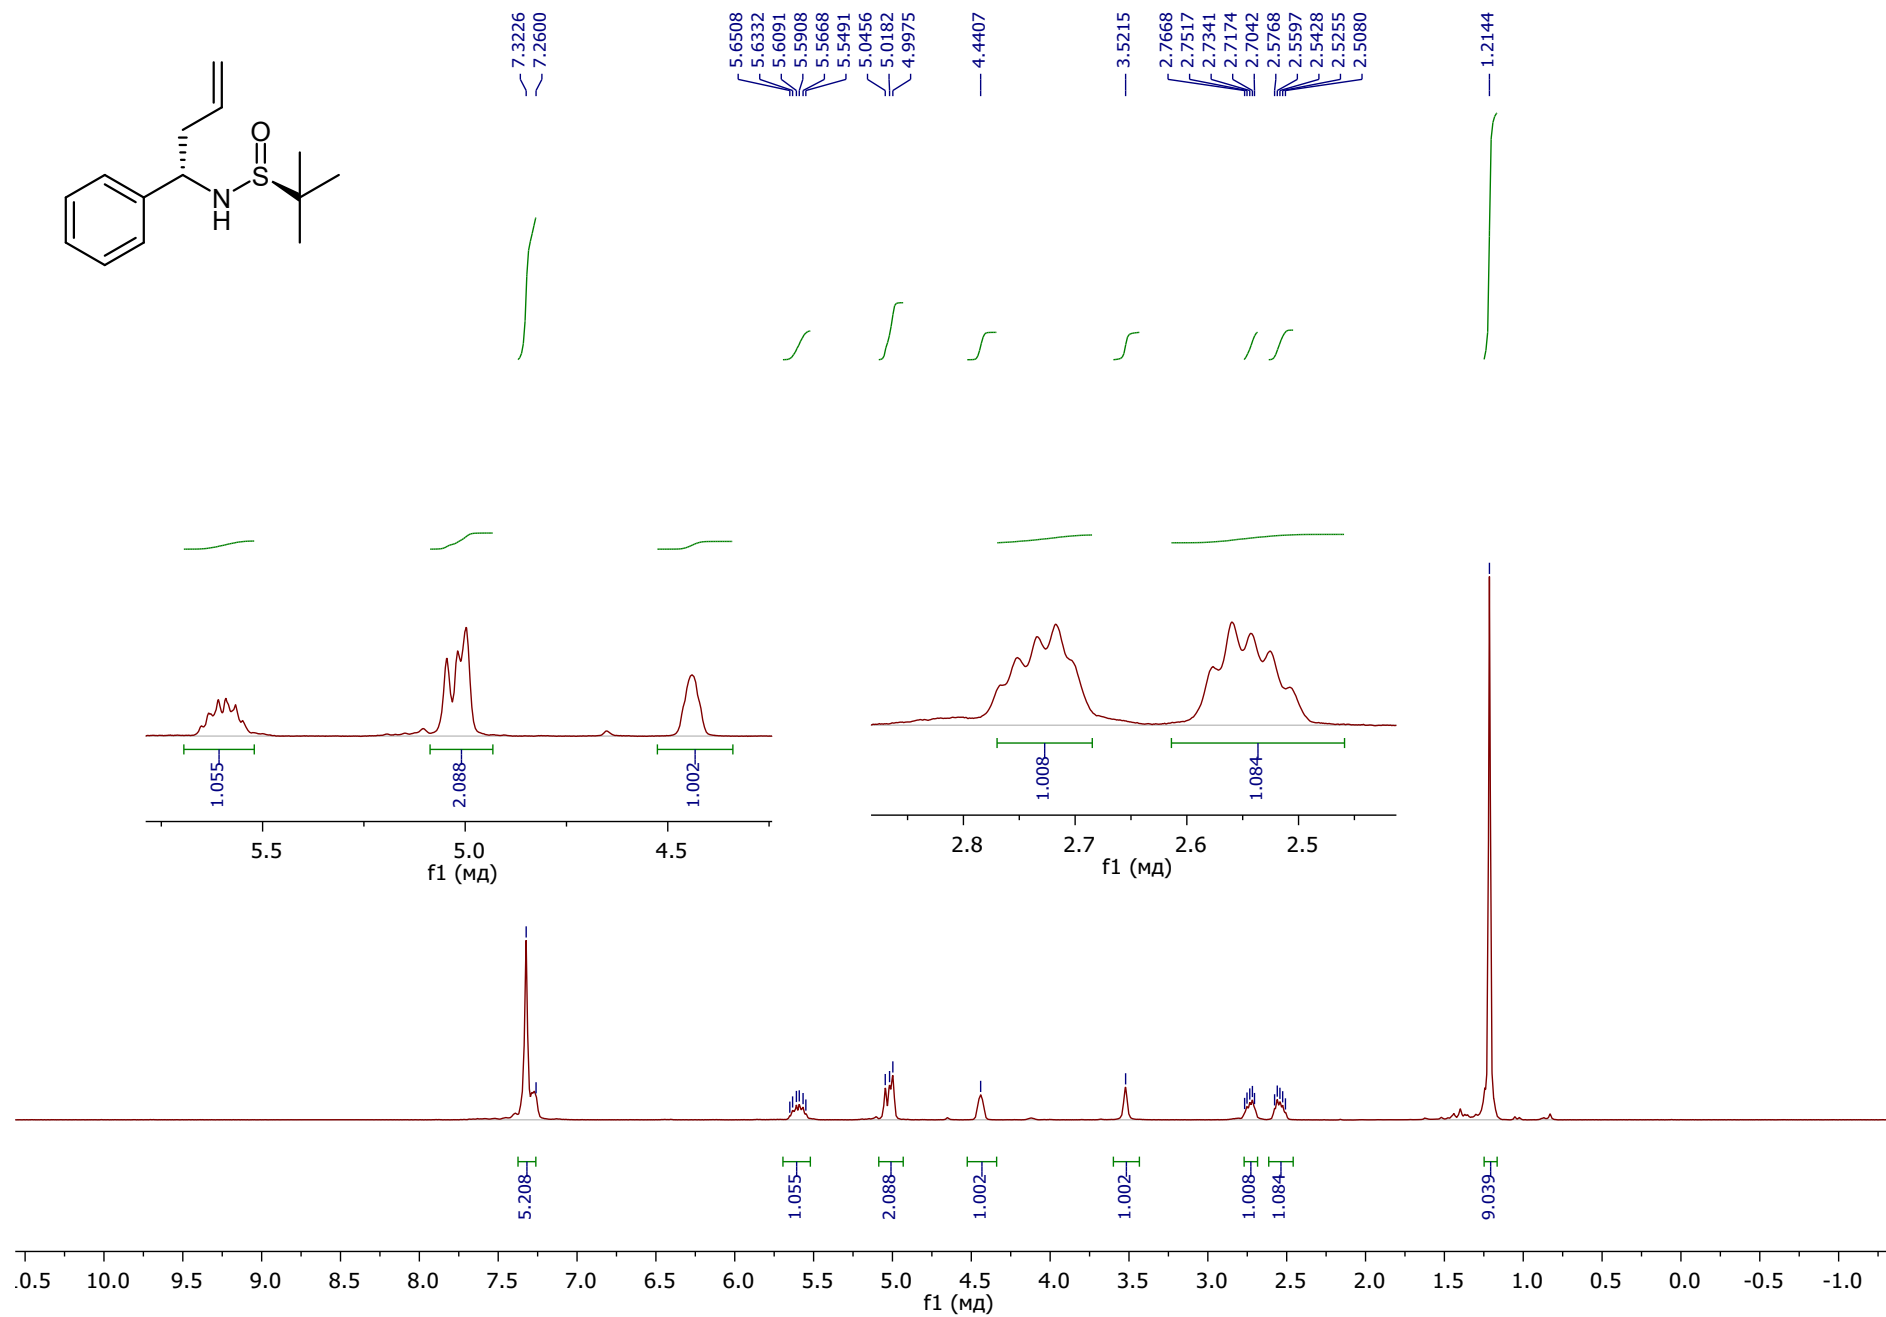



<sup>1</sup>H NMR (CDCl<sub>3</sub>, 400 MHz) **3c**

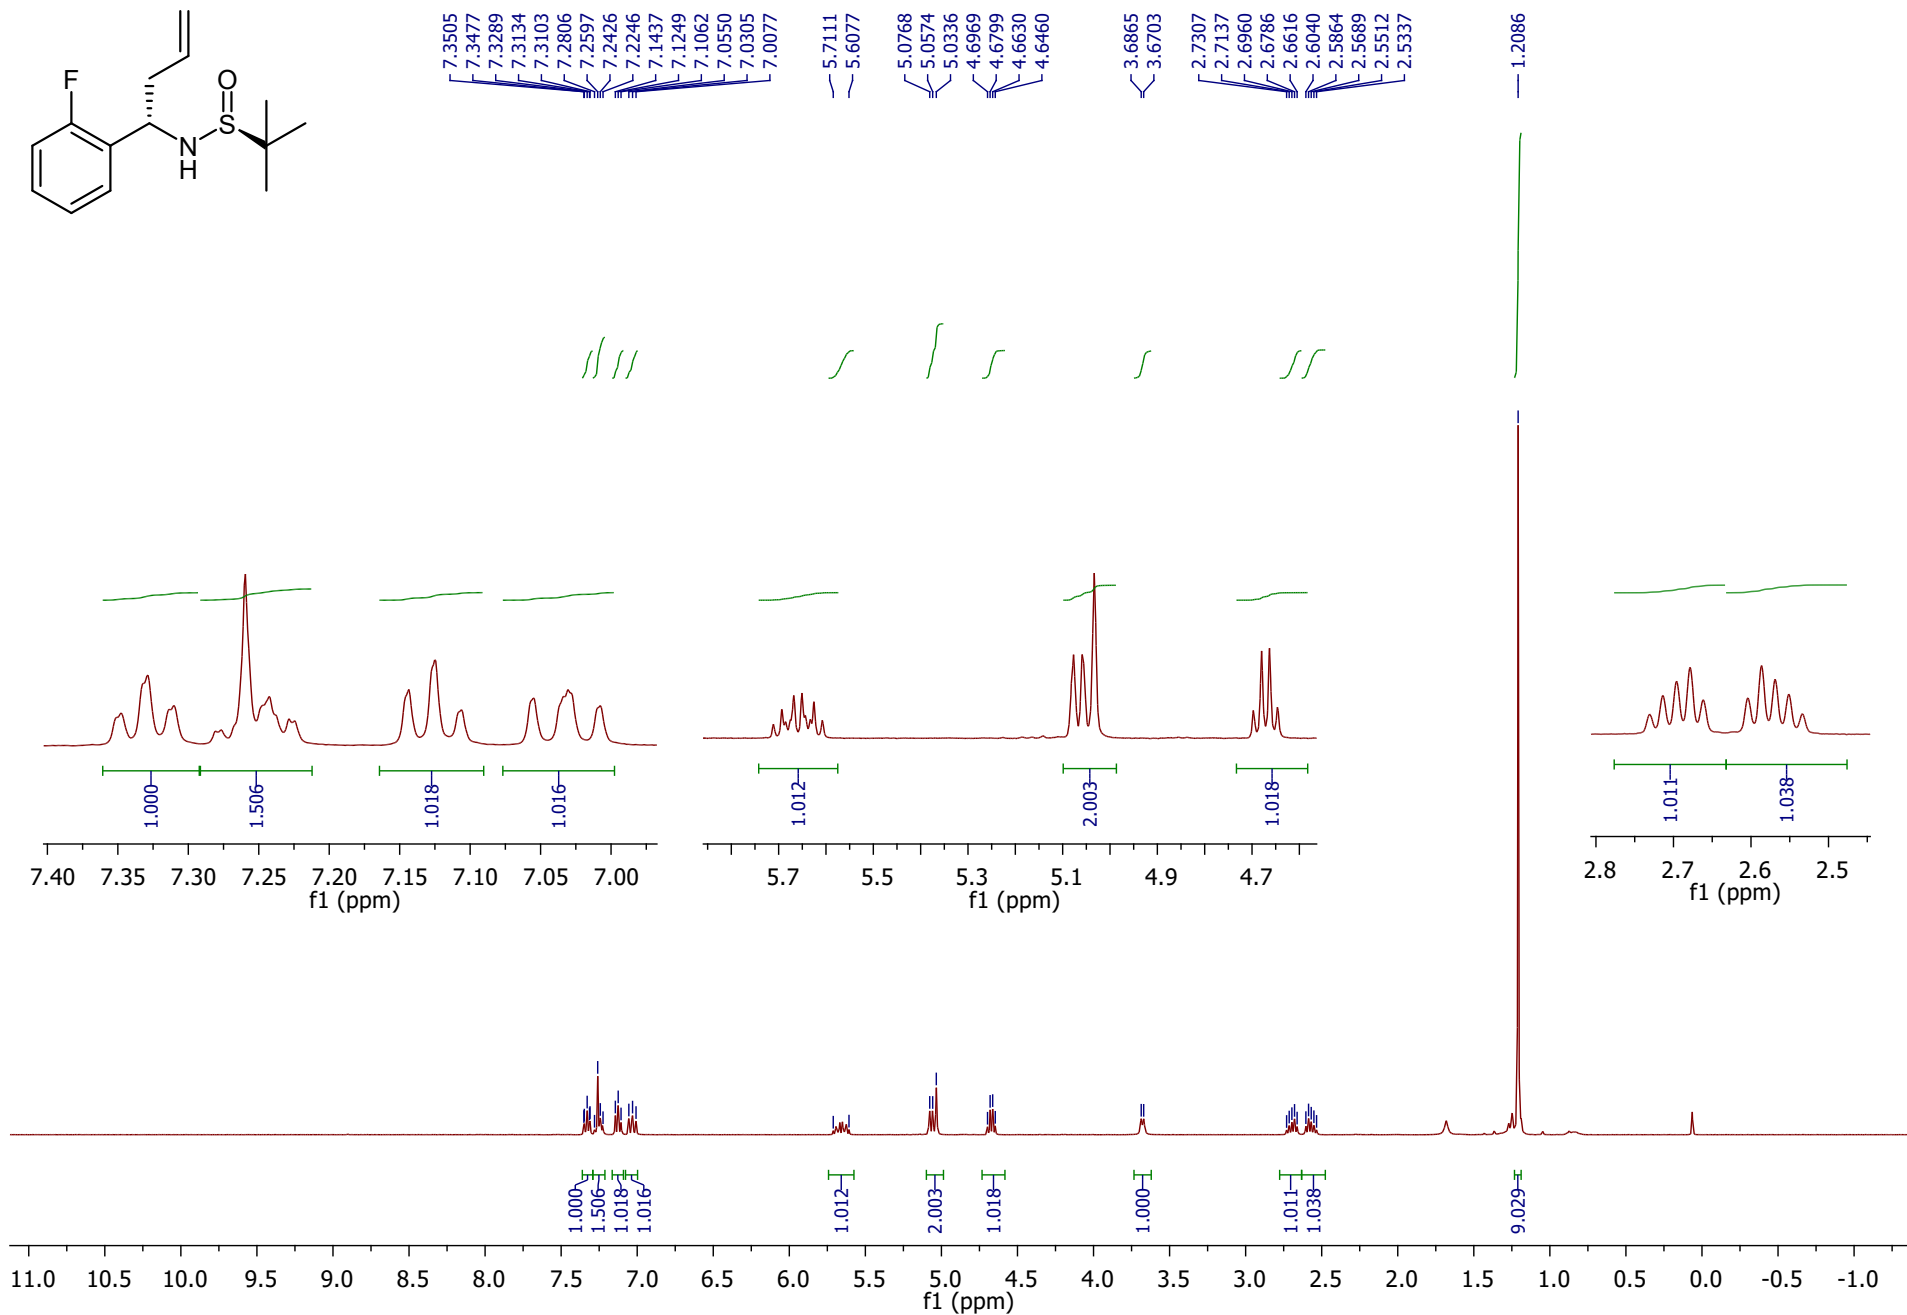

<sup>1</sup>H NMR (CDCl<sub>3</sub>, 400 MHz) **3d**

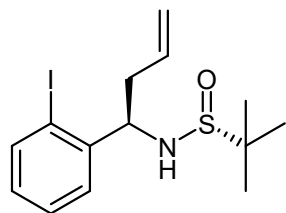

7.8349  
7.8156  
7.3735  
7.3274  
7.2603  
6.9814  
6.9393

5.7368  
5.6332  
5.1125  
5.1038  
5.0746  
4.7567  
4.7415  
4.7268  
4.7115

3.7725  
3.7597

2.6134  
2.5965  
2.5806

1.1943

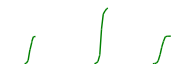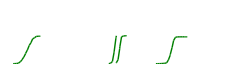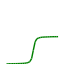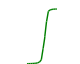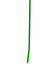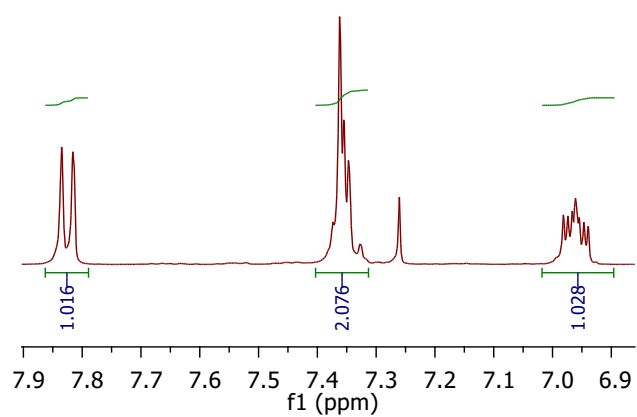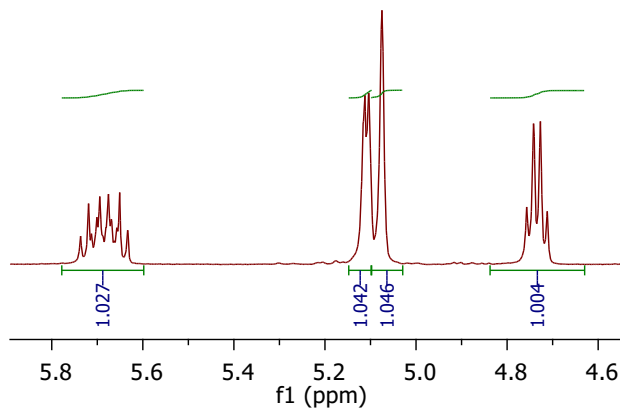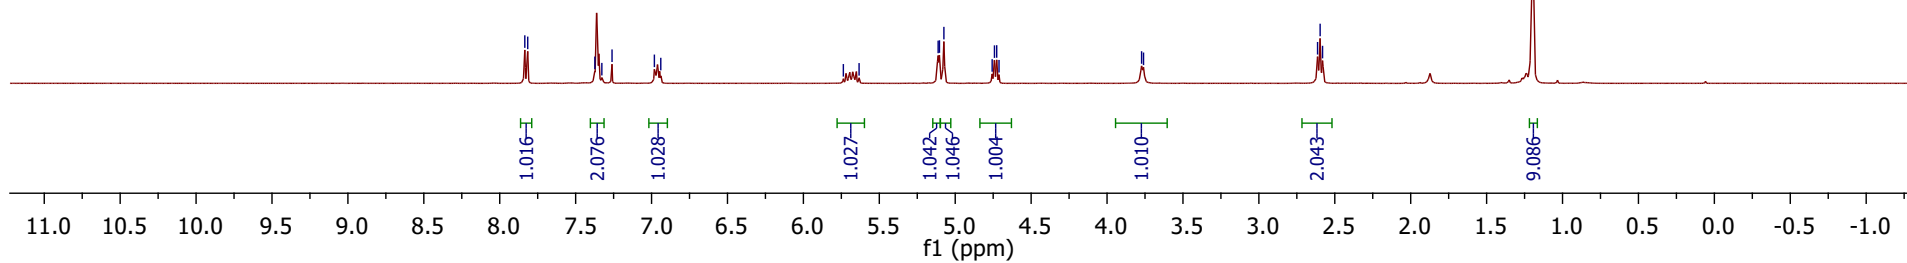

<sup>13</sup>C NMR (CDCl<sub>3</sub>, 101 MHz) **3d**

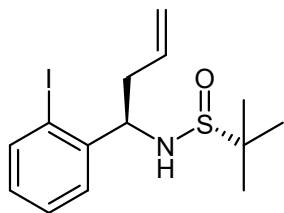

— 143.6136  
— 139.8150  
— 133.3622  
— 129.3878  
— 128.4733  
— 128.3344  
— 118.9434

— 99.5343

— 61.4971  
— 56.4170

— 40.5988

— 22.6514

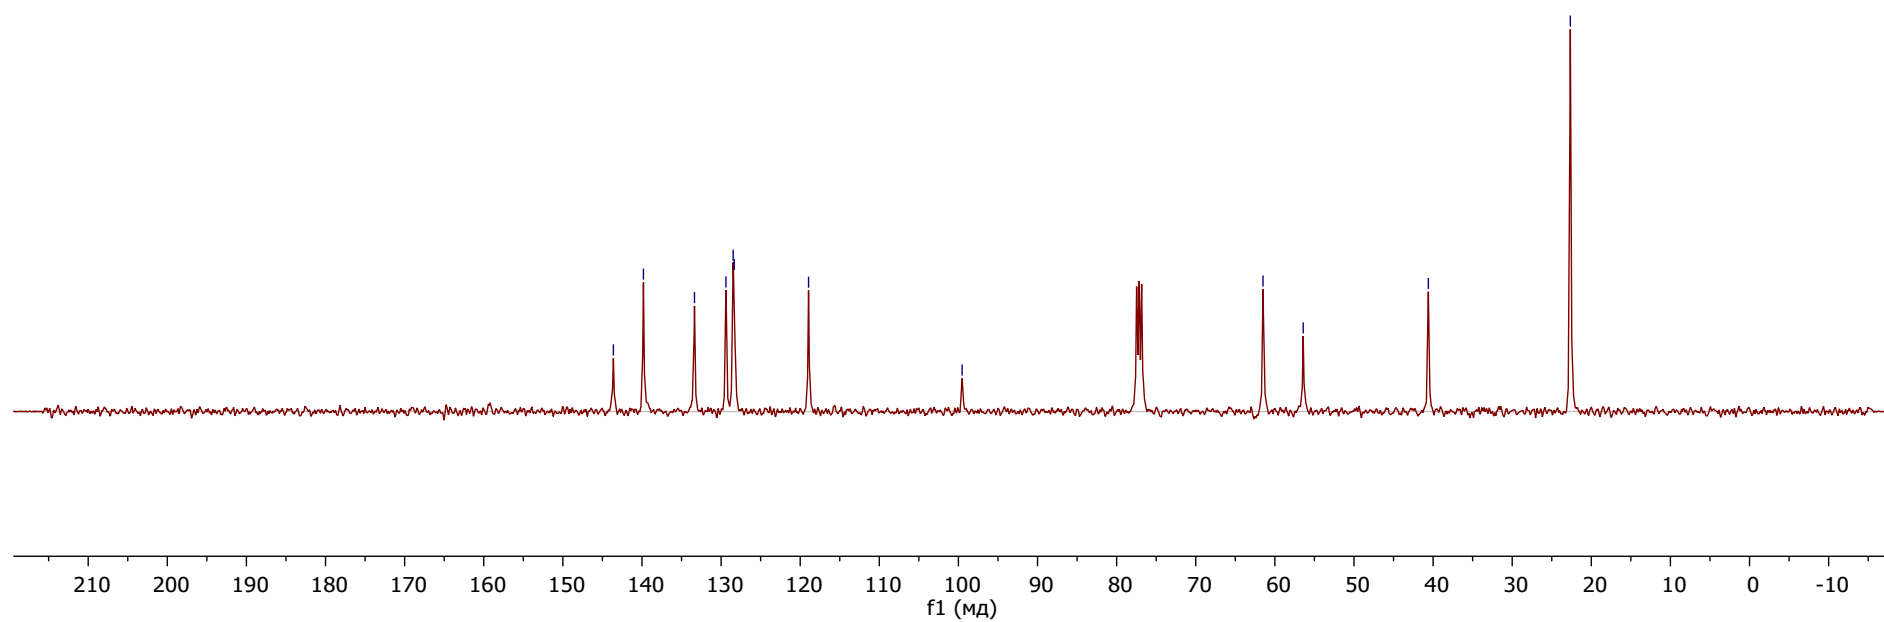

$^1\text{H}$  NMR ( $\text{CDCl}_3$ , 400 MHz) **3e**

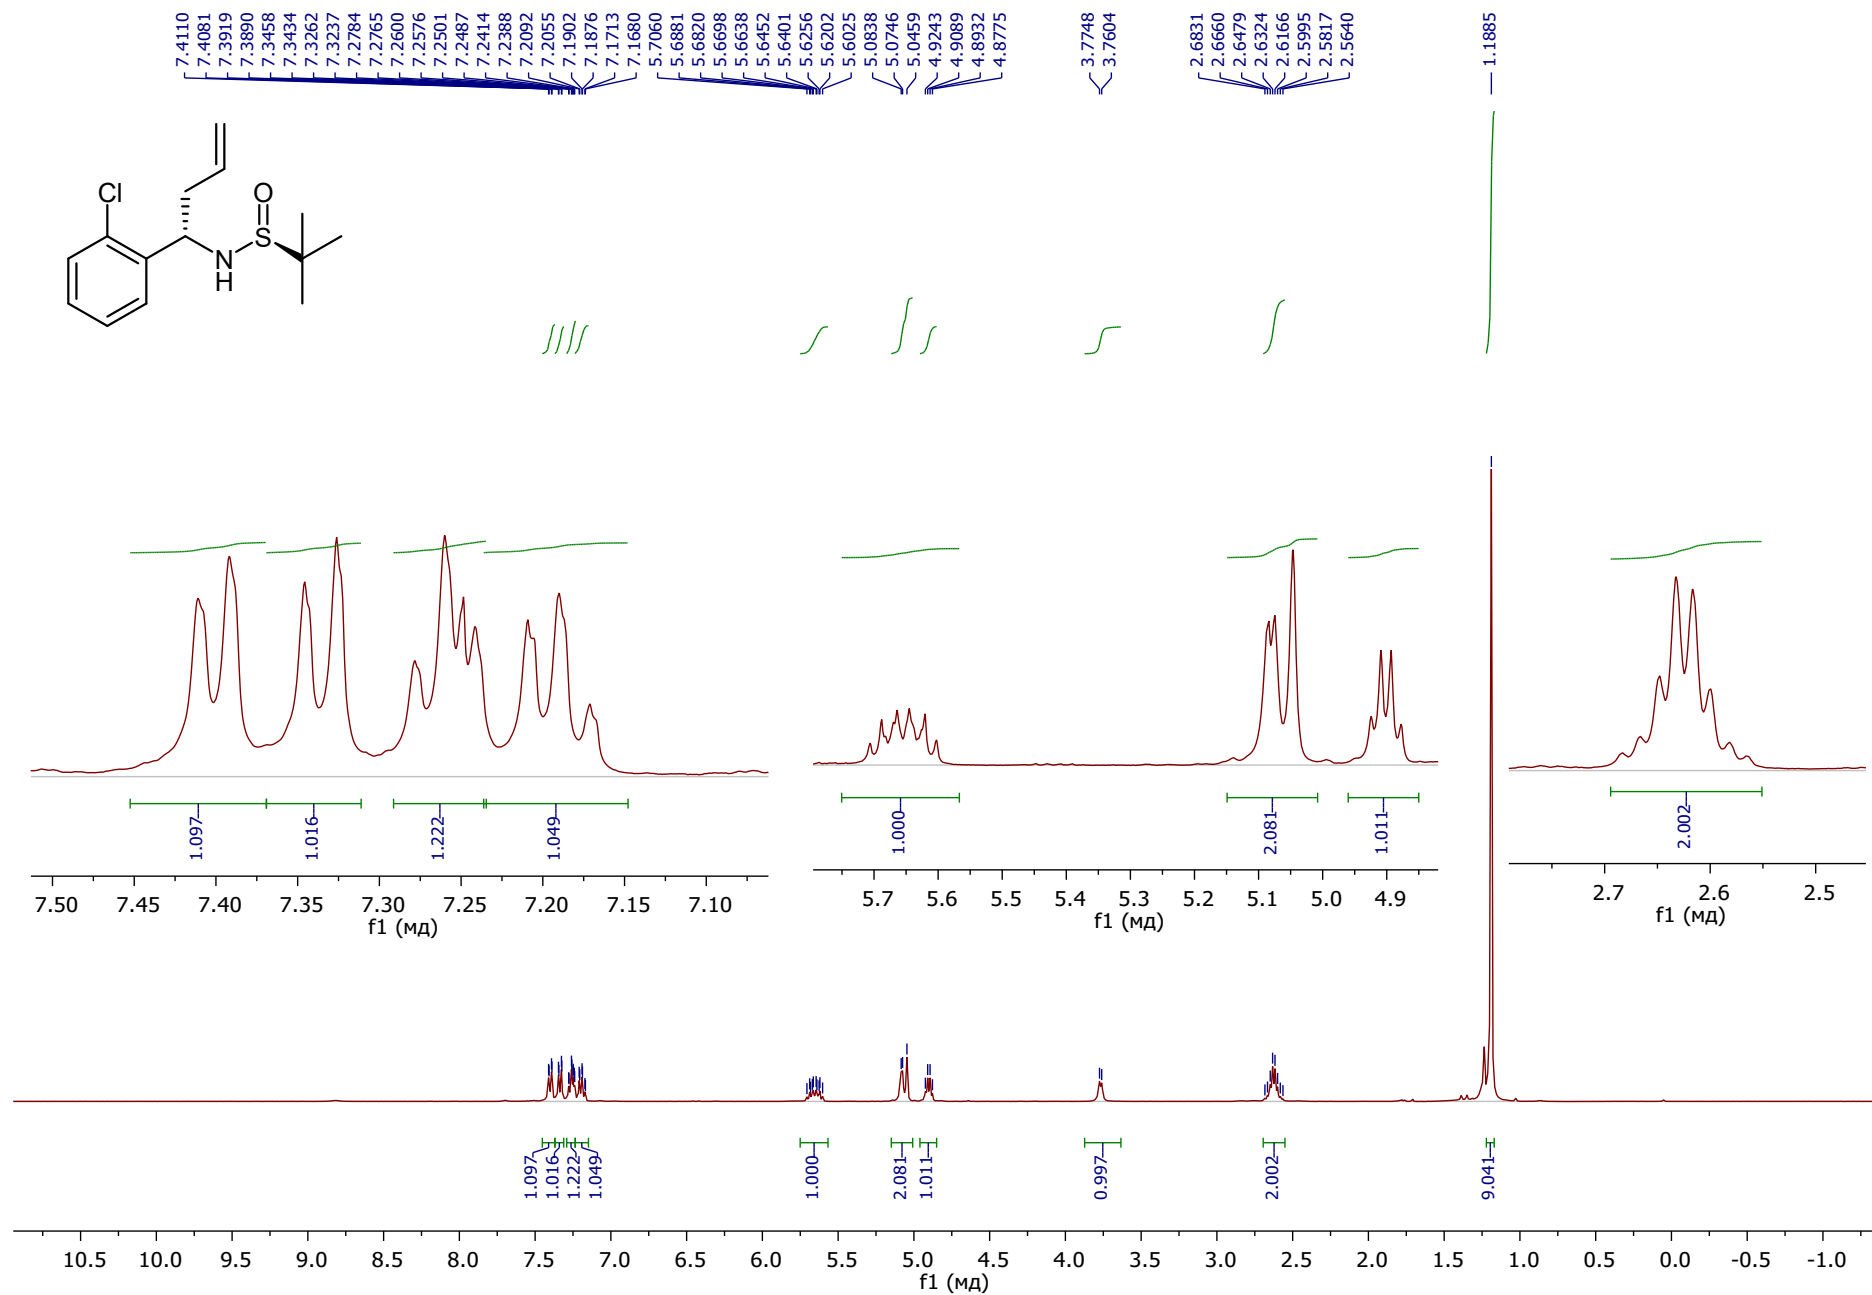

<sup>1</sup>H NMR (CDCl<sub>3</sub>, 400 MHz) **3f**

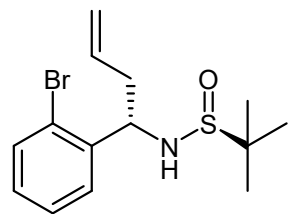

7.5476  
7.5277  
7.4170  
7.3977  
7.3359  
7.3175  
7.2984  
7.1450  
7.1262  
7.1069

3.8059  
3.7924

2.6424  
2.6257  
2.6089

1.1981

|||||

|||

||

||

|||

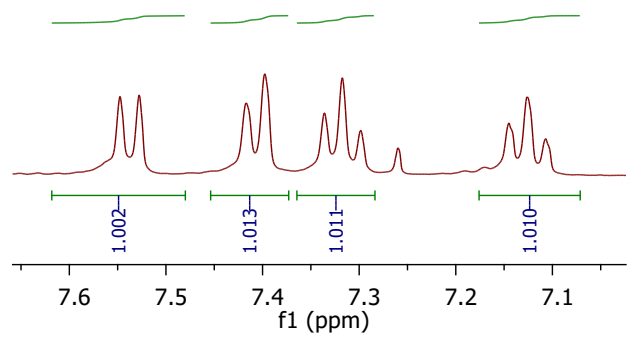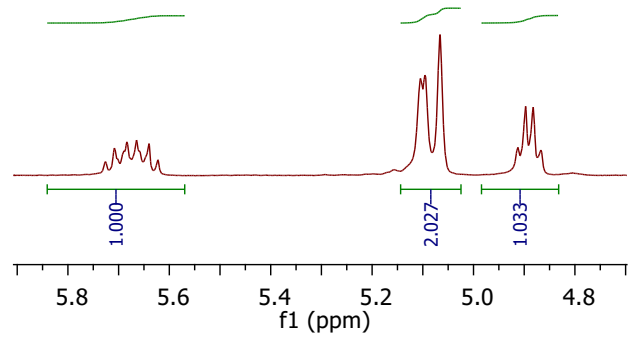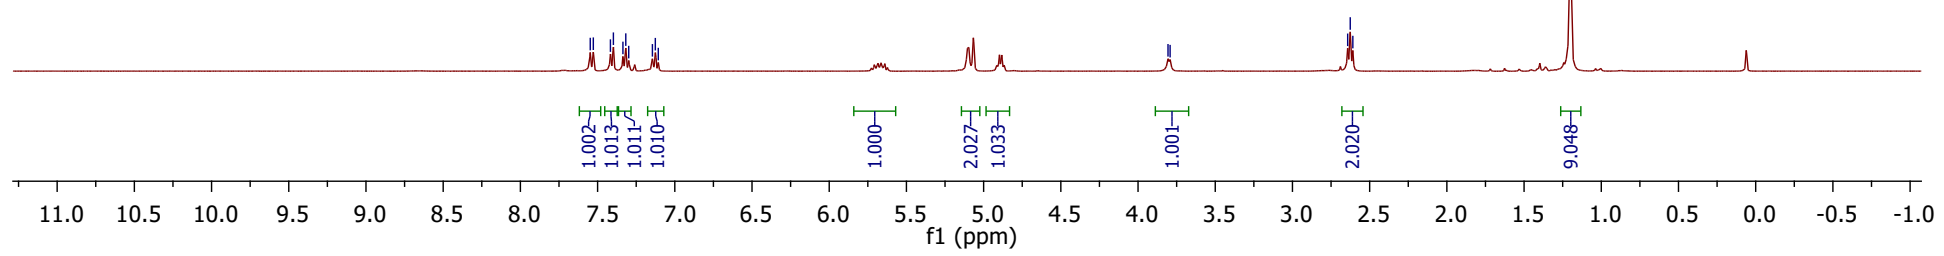

<sup>13</sup>C NMR (CDCl<sub>3</sub>, 101 MHz) **3f**

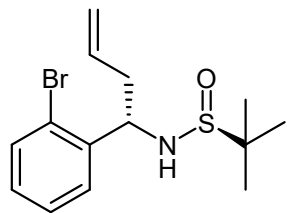

— 140.9129  
133.5024  
133.2472  
129.1640  
128.8140  
127.7276  
123.3477  
118.9194

57.3104  
56.5180

— 40.4483

— 22.7154

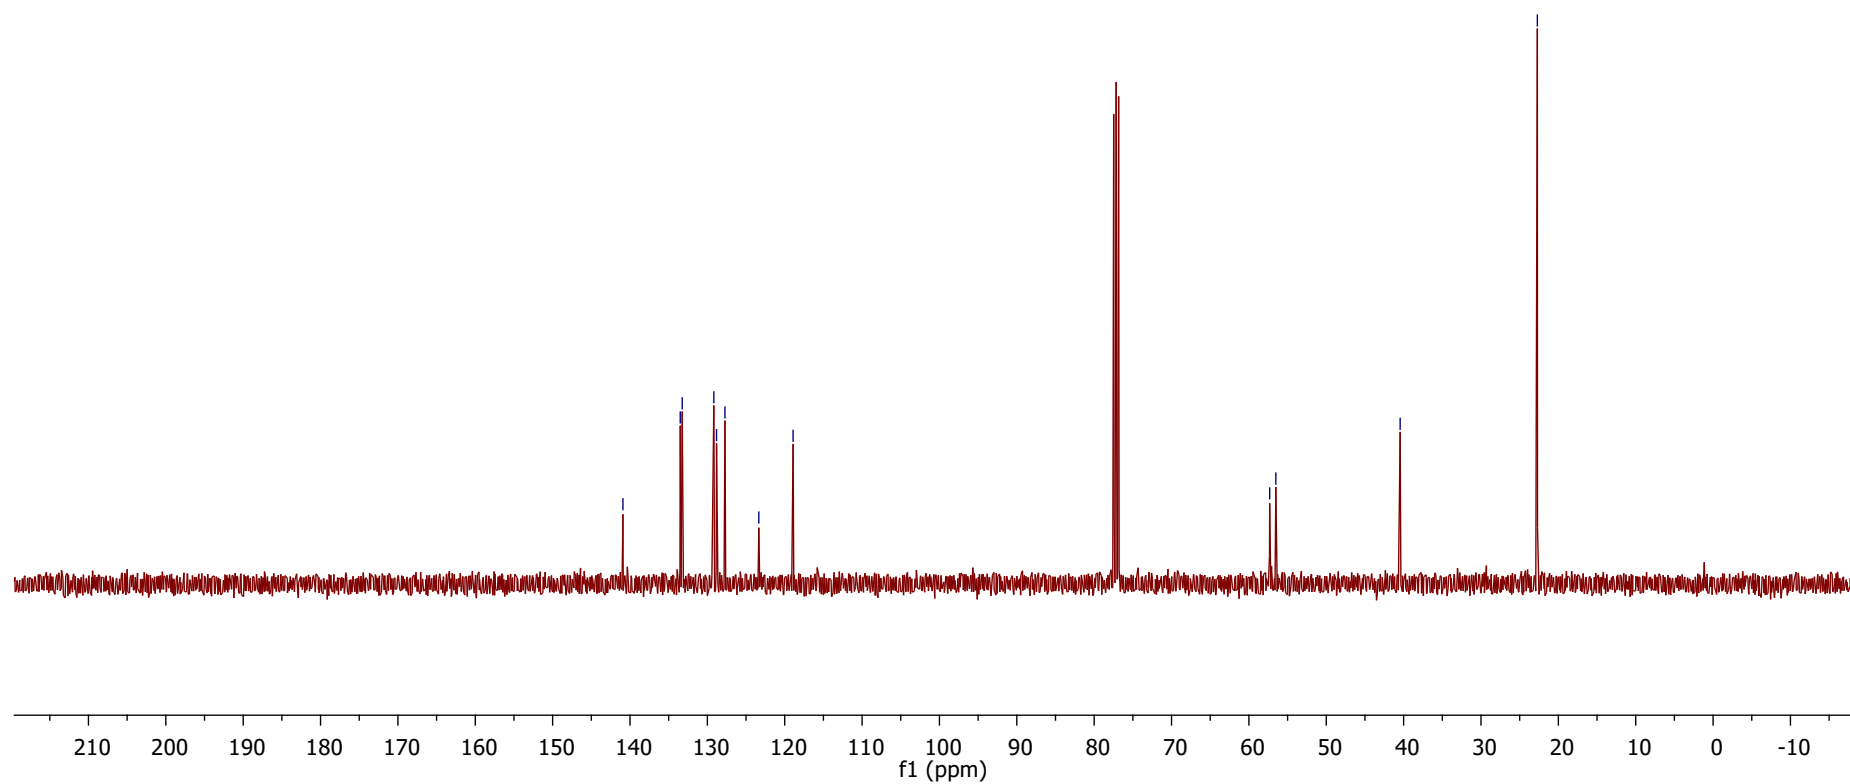

<sup>1</sup>H NMR (CDCl<sub>3</sub>, 400 MHz) **3g**

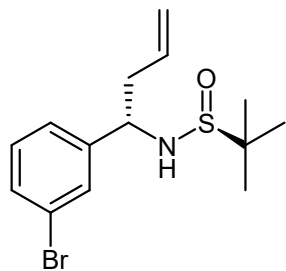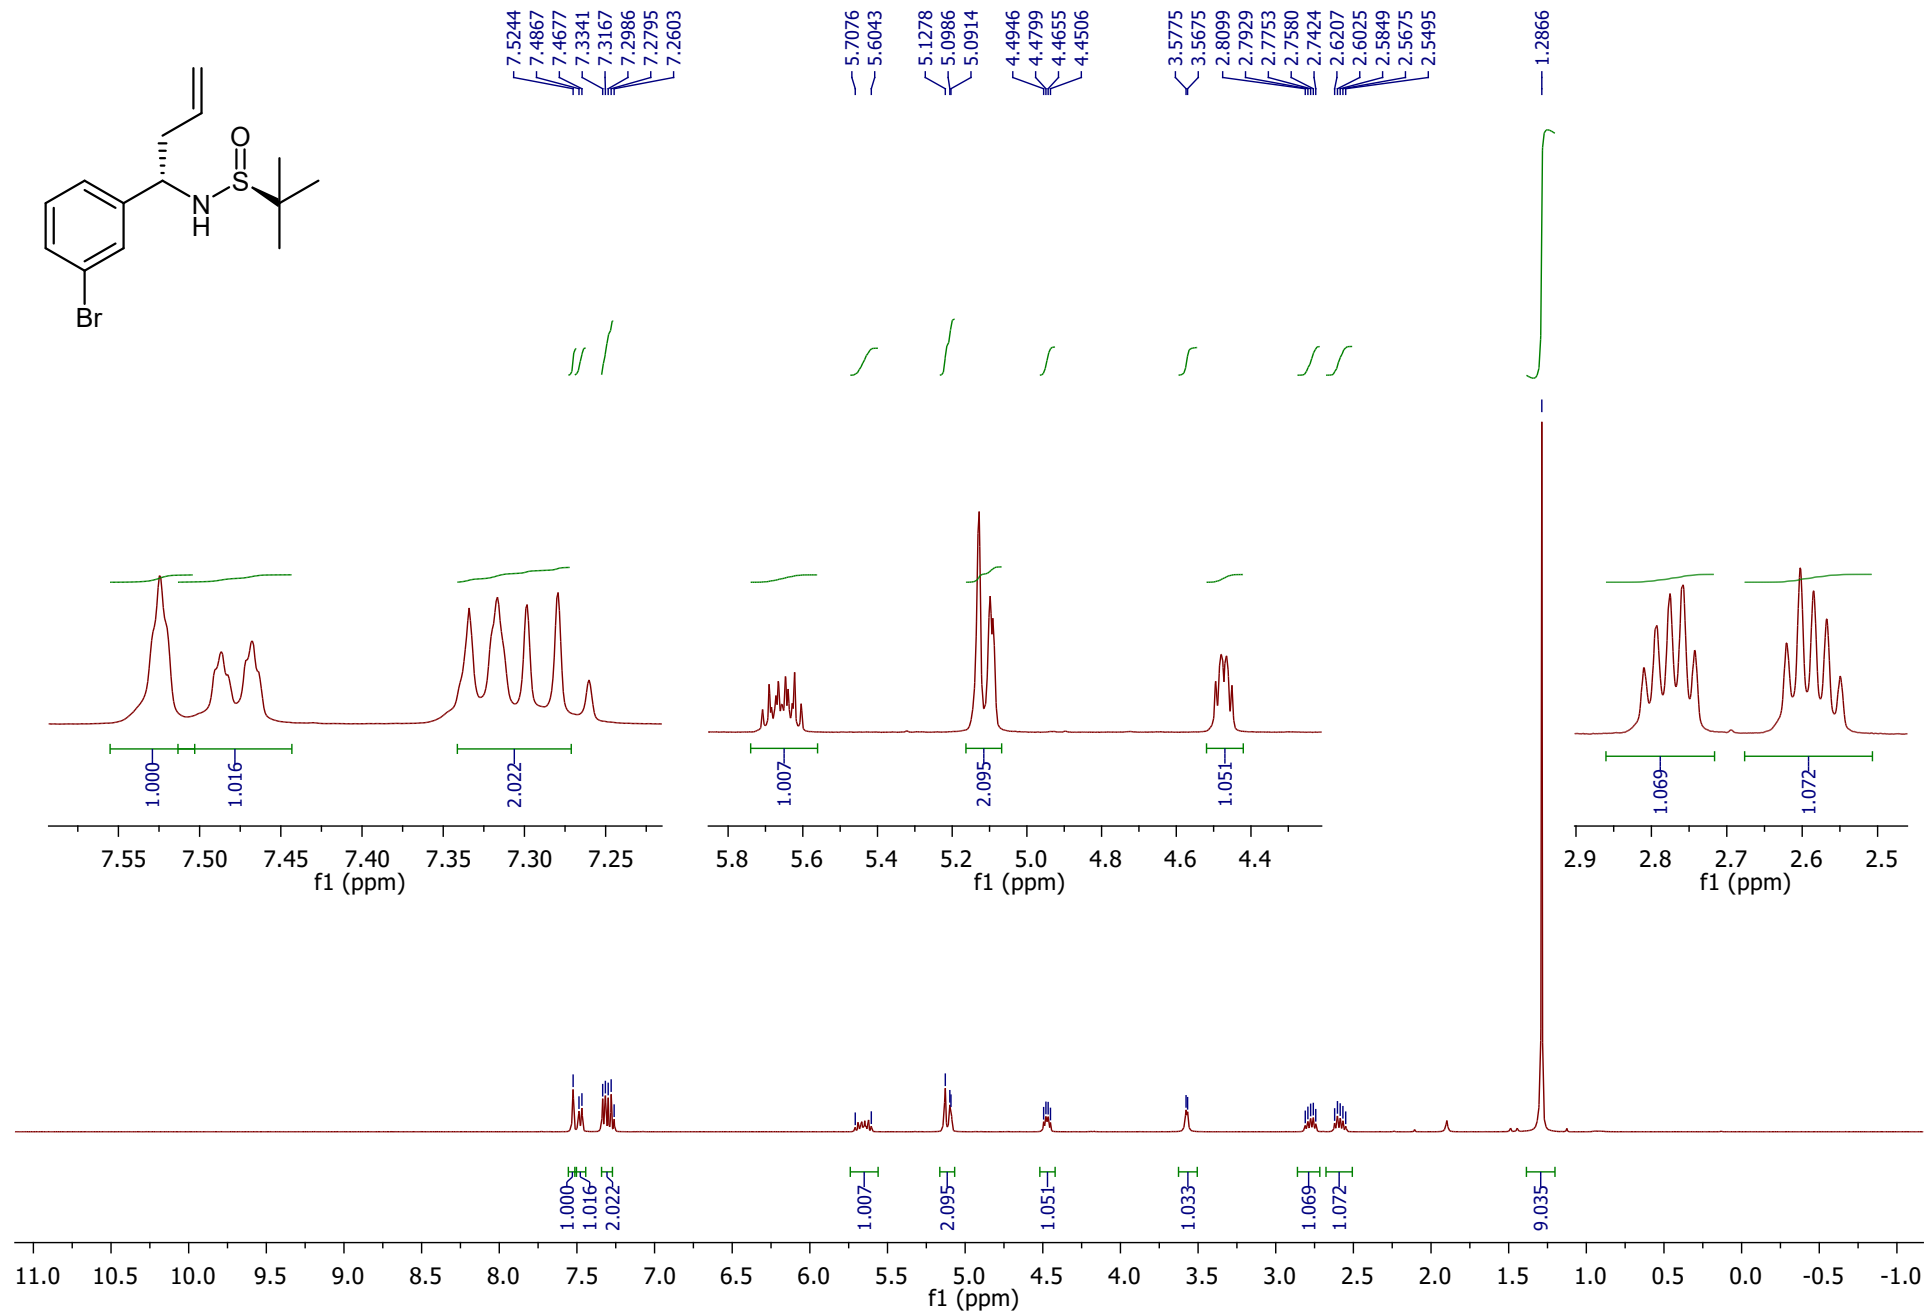

<sup>1</sup>H NMR (CDCl<sub>3</sub>, 400 MHz) **3h**

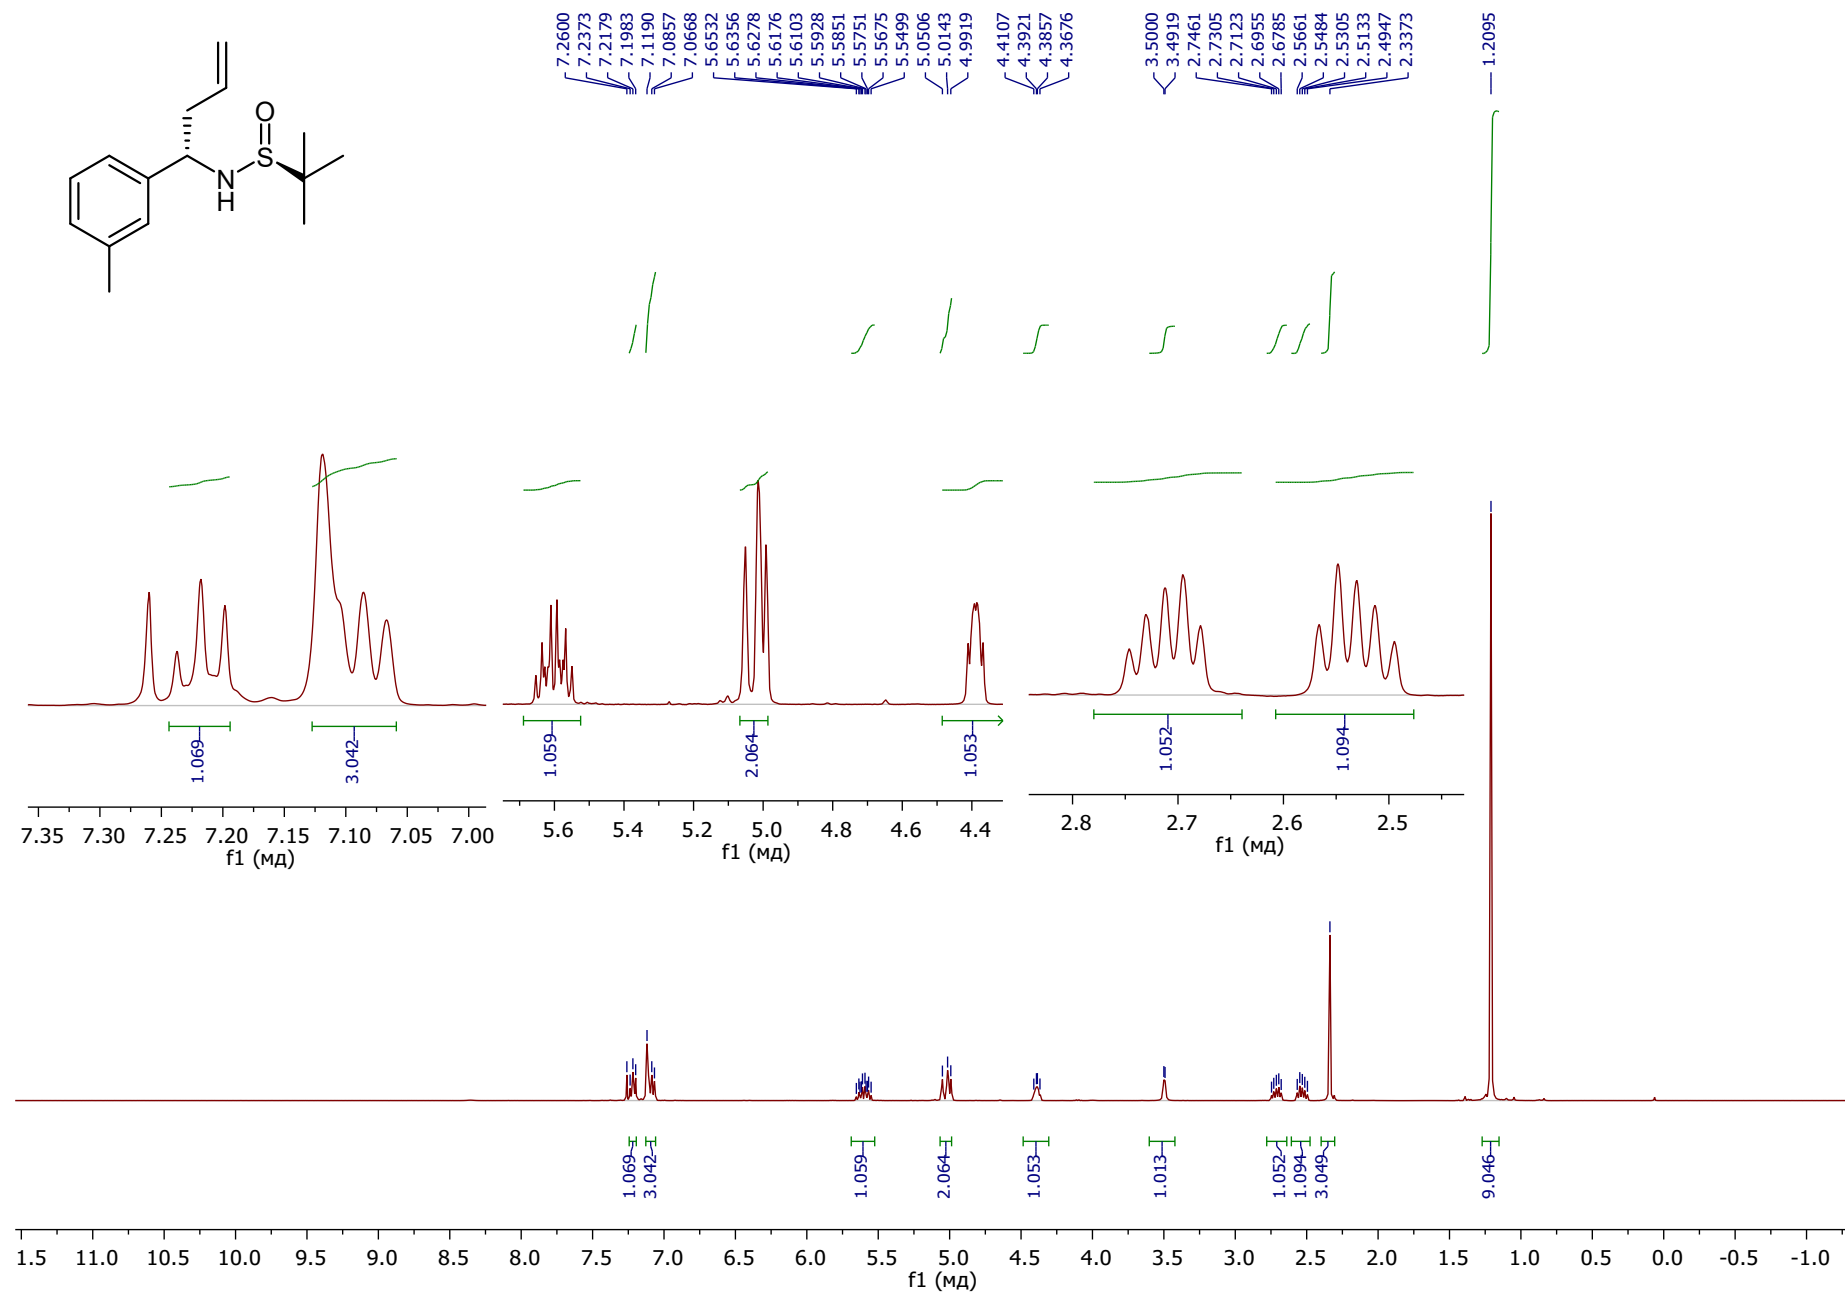



<sup>1</sup>H NMR (CDCl<sub>3</sub>, 400 MHz) **3i**

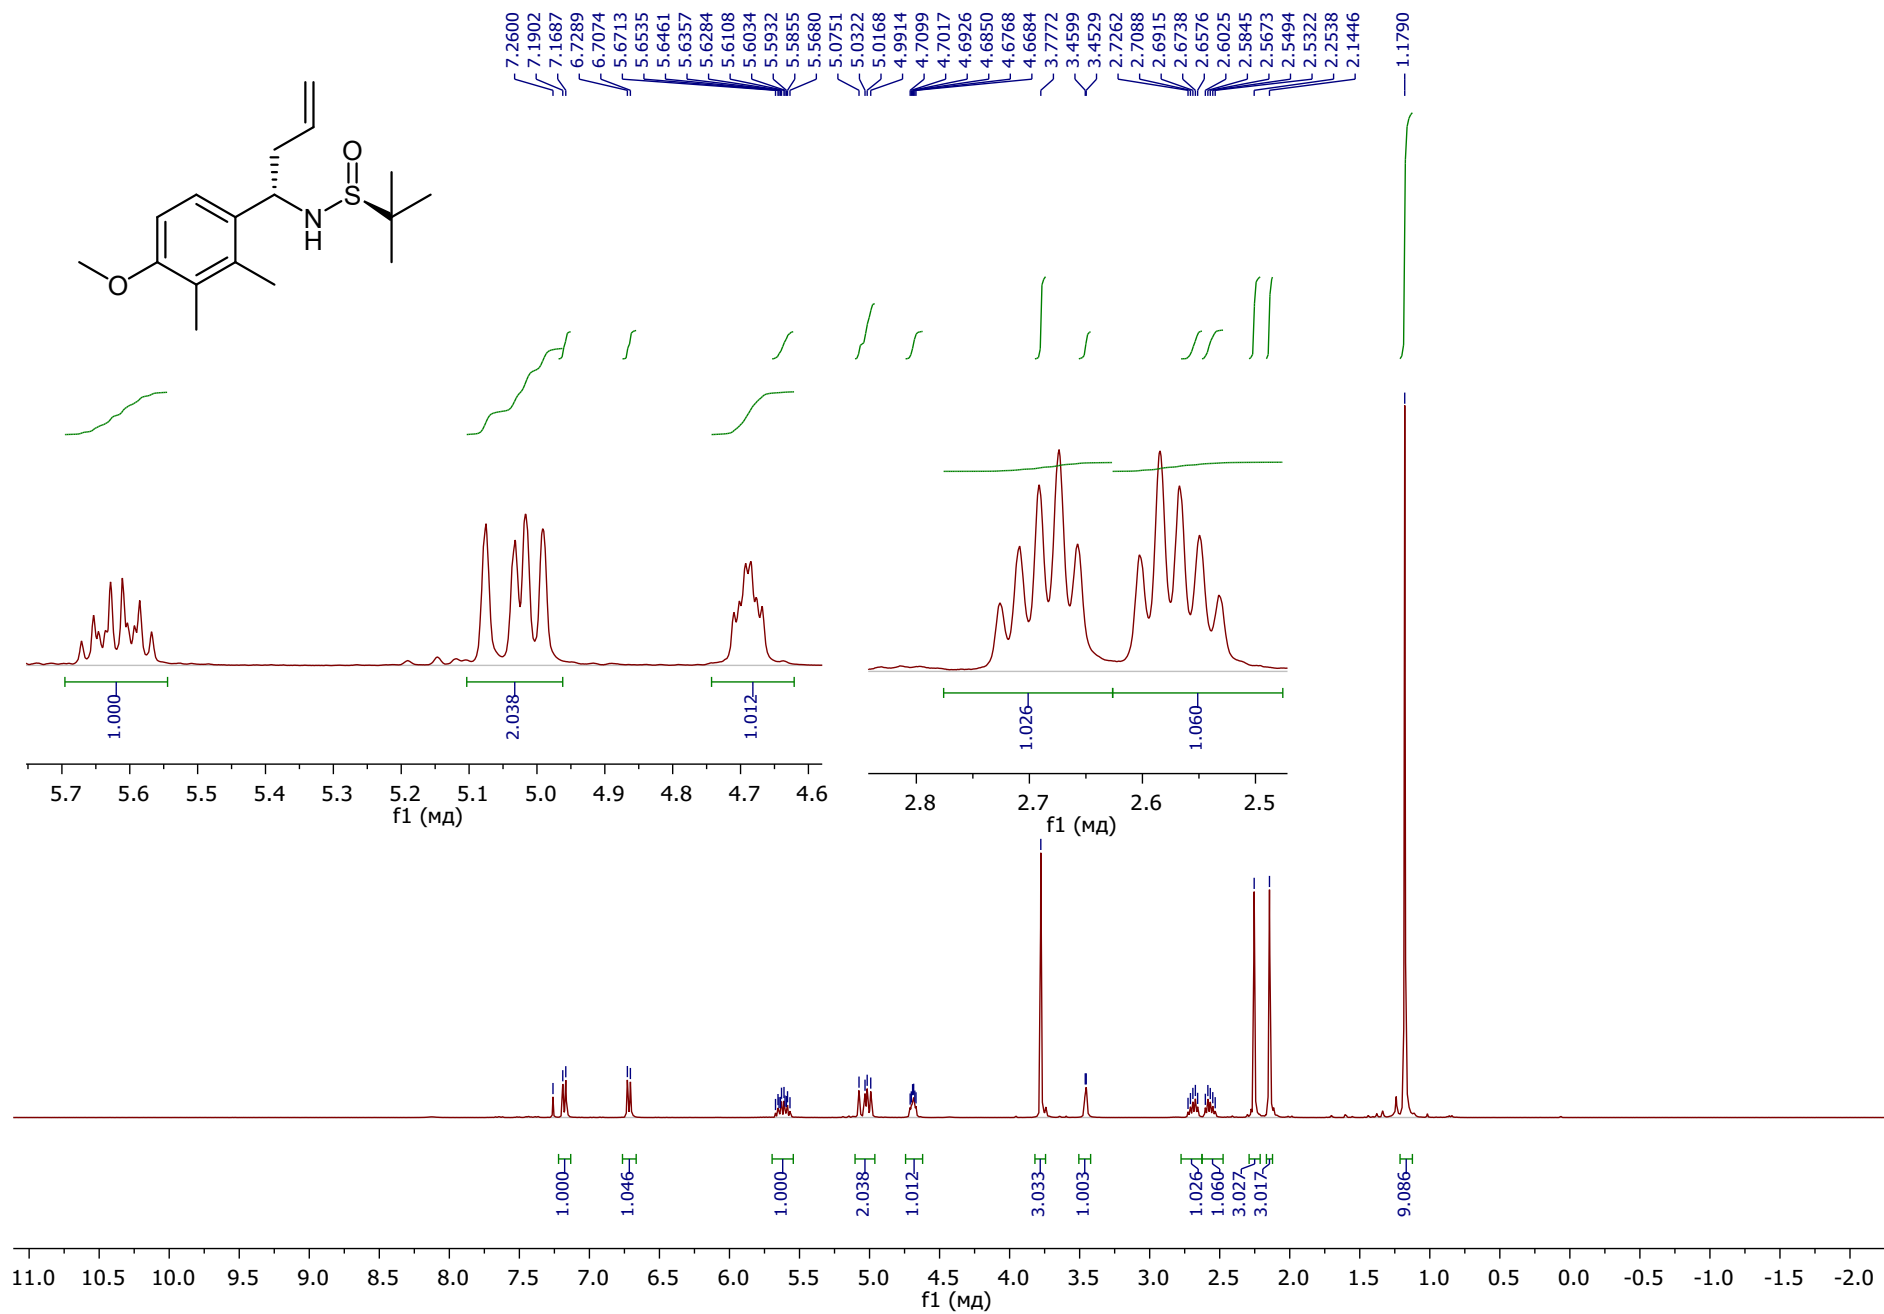

$^{13}\text{C}$  NMR (CDCl<sub>3</sub>, 101 MHz) **3i**

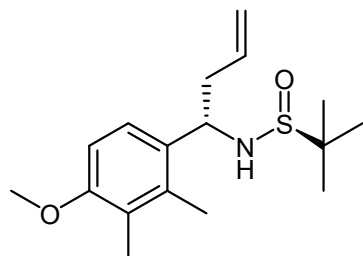

— 156.7171

— 135.7263

— 134.3072

— 131.6415

— 125.3433

— 124.6273

— 117.9995

— 107.6940

— 55.7357

— 55.3700

— 54.1343

— 40.7089

— 22.6486

— 15.2802

— 12.1559

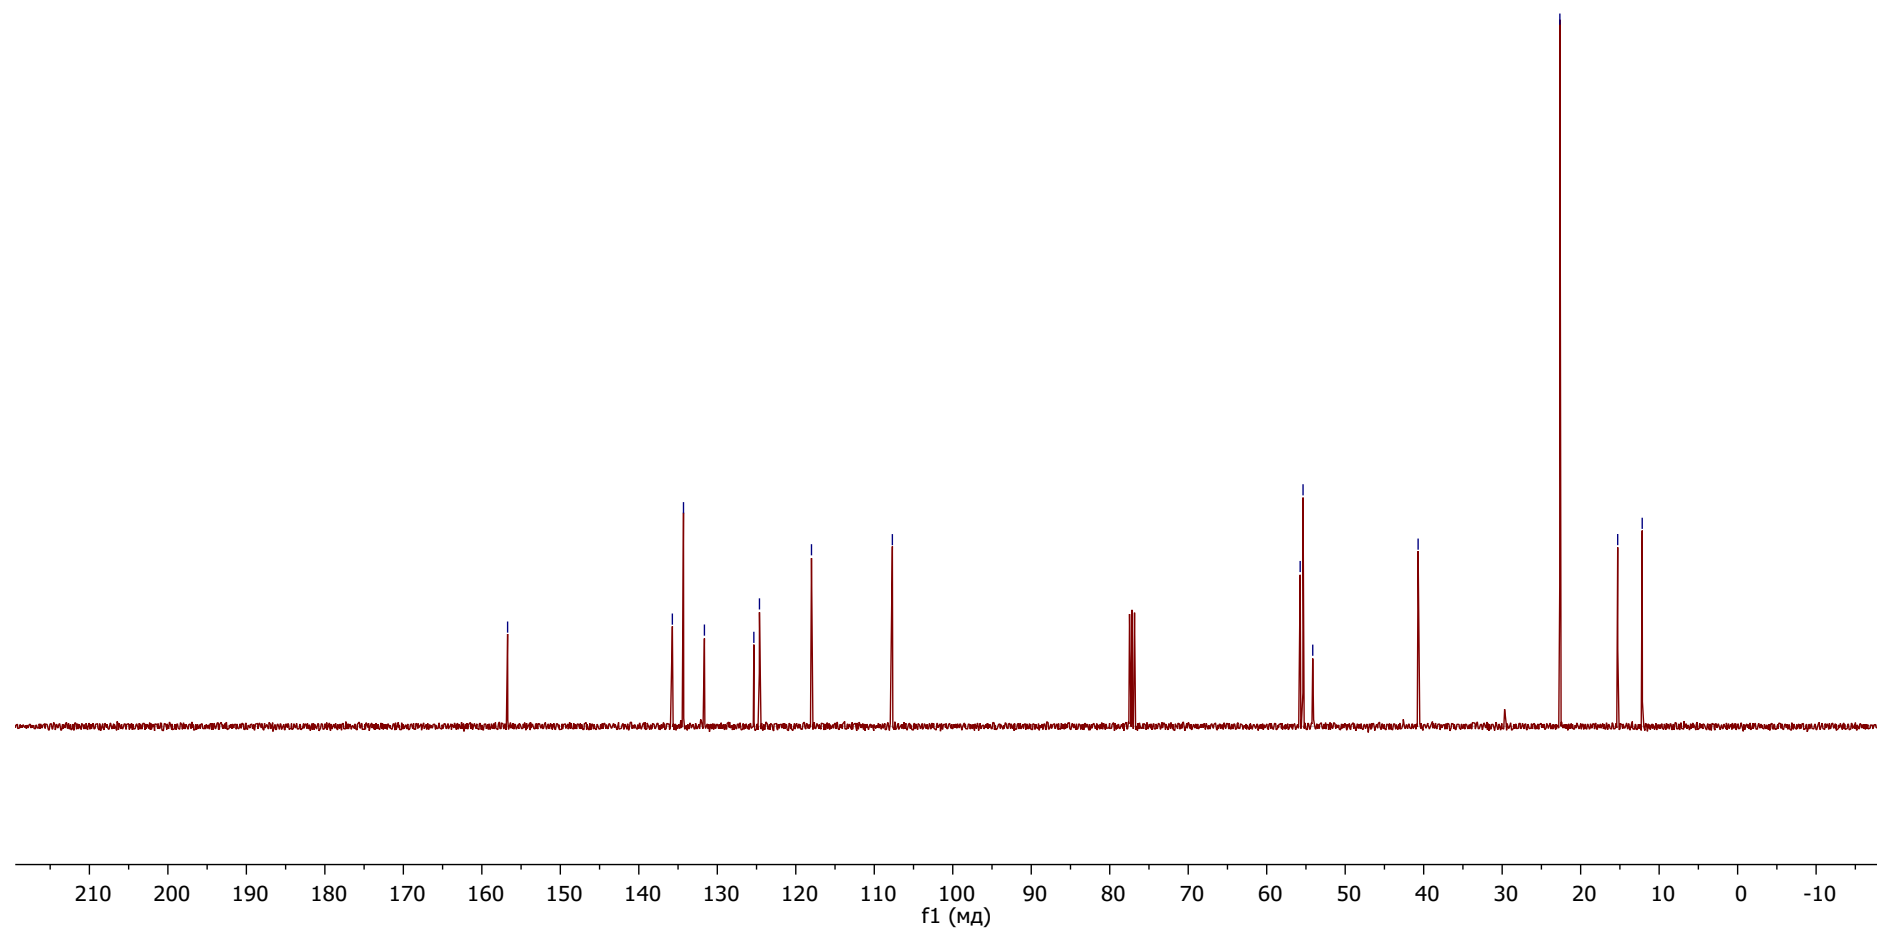

<sup>1</sup>H NMR (CDCl<sub>3</sub>, 400 MHz) 3j

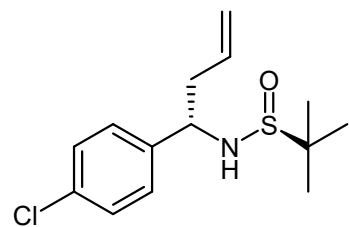

7.3092  
7.2888  
7.2600  
7.2390

5.6266  
5.6089  
5.5850  
5.5657  
5.5418  
5.5239

5.0363  
5.0036

4.4272  
4.4120  
4.4040  
4.3885

3.5110  
3.5053

2.7282  
2.7148  
2.6971  
2.6806  
2.6654

2.5329  
2.5161  
2.4989  
2.4820  
2.4641

1.2004

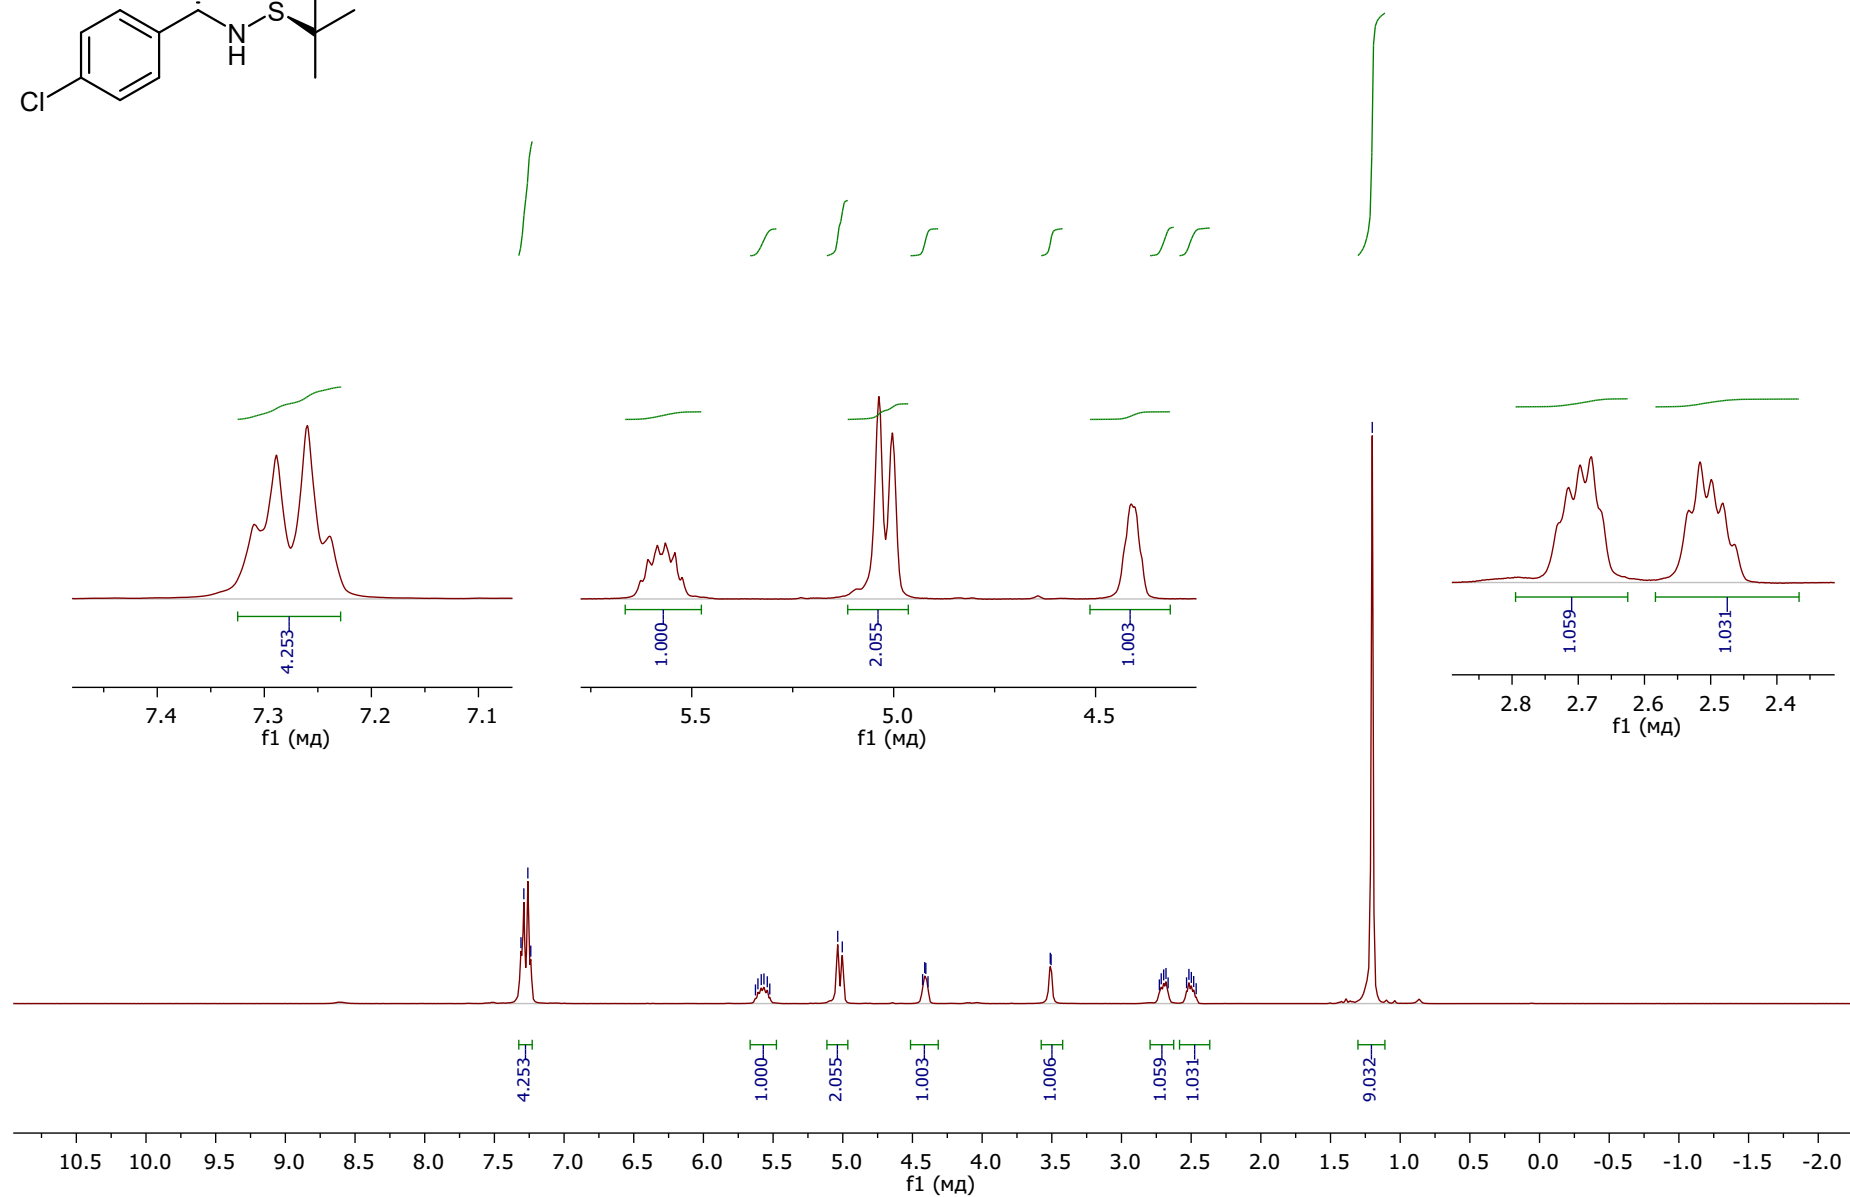

<sup>1</sup>H NMR (CDCl<sub>3</sub>, 400 MHz) **3k**

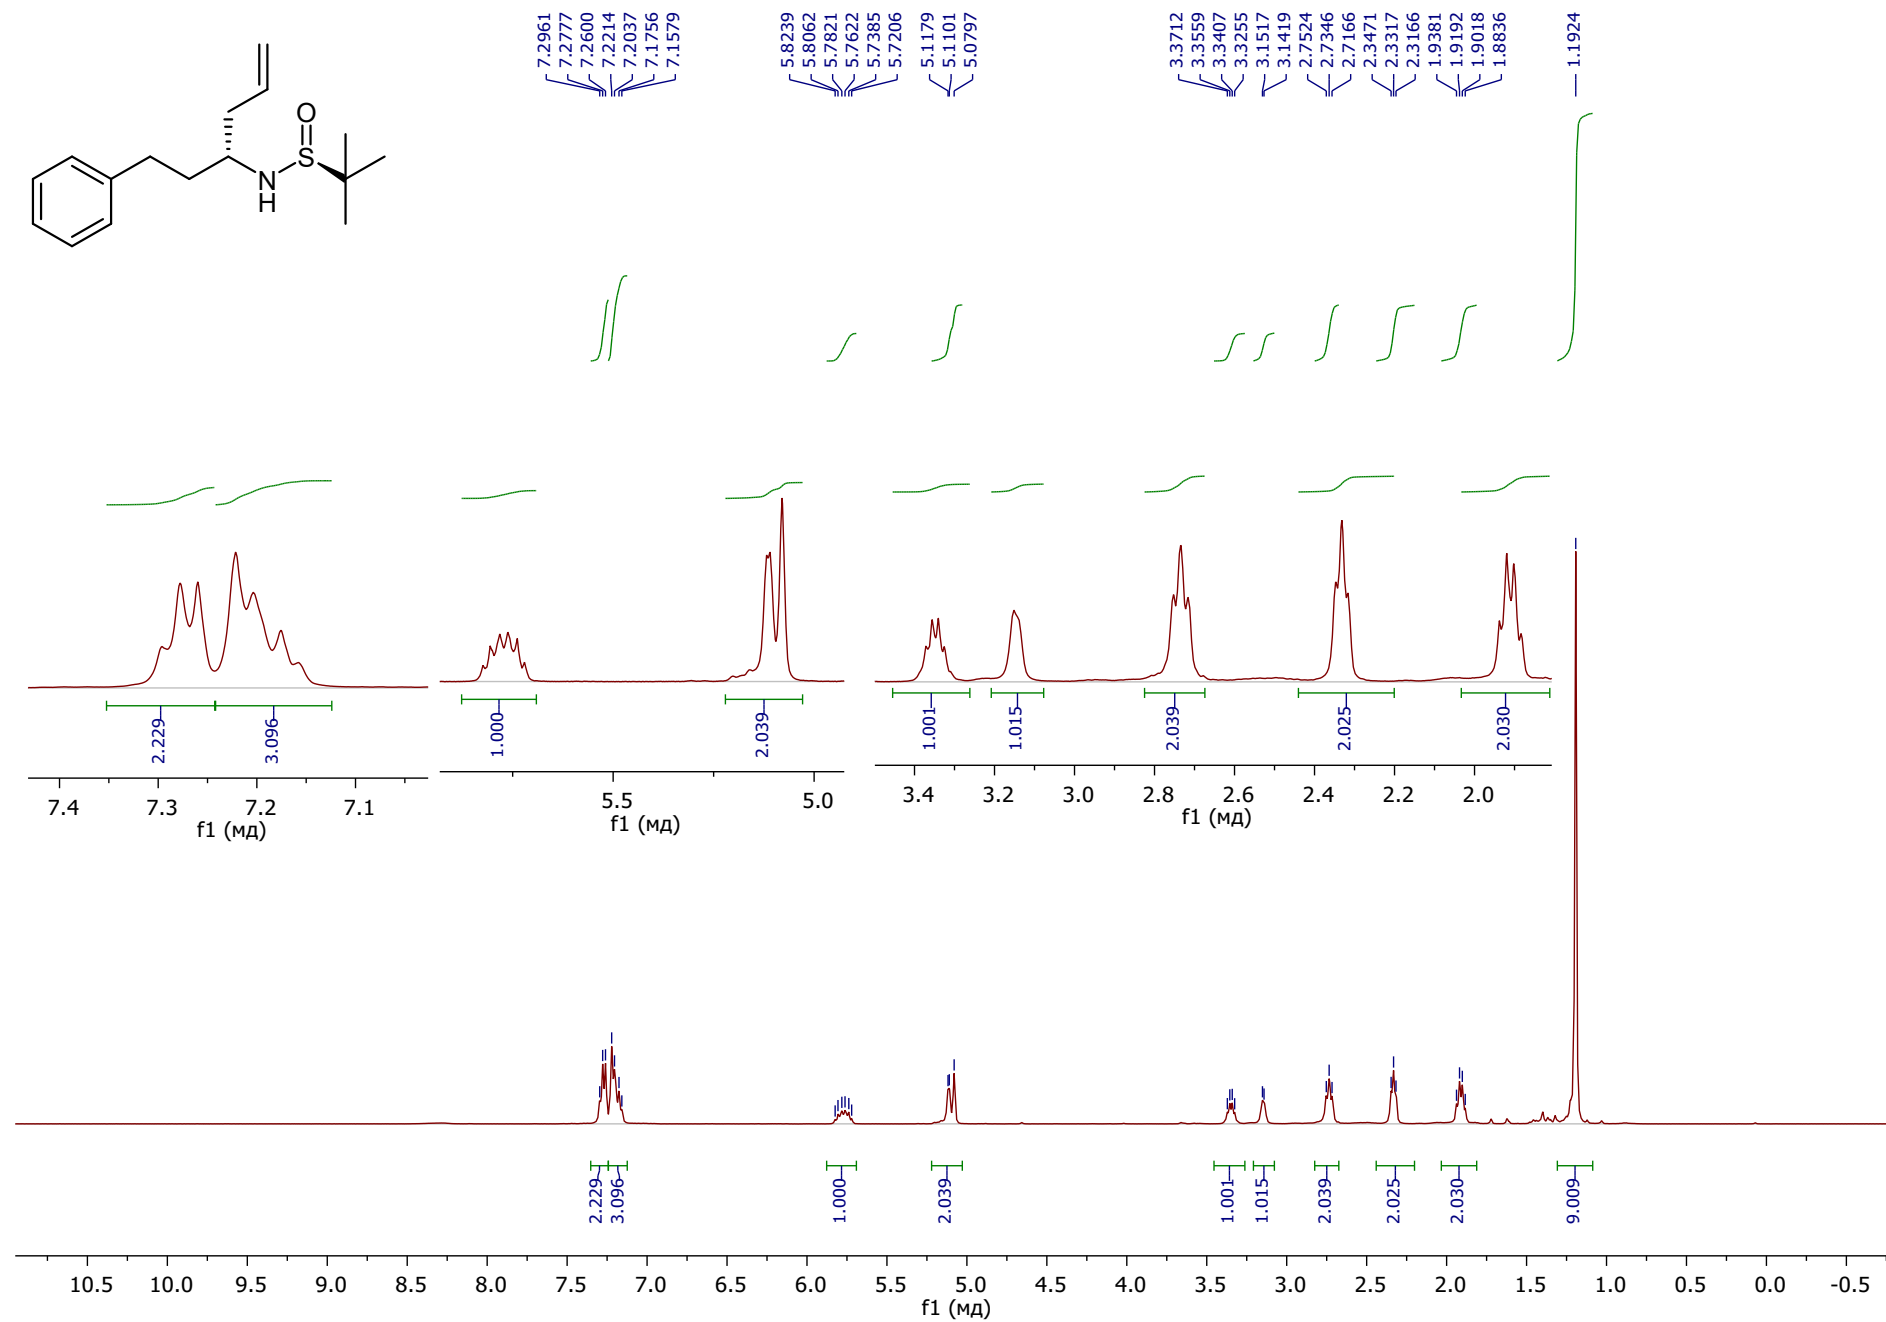

<sup>1</sup>H NMR (CDCl<sub>3</sub>, 400 MHz) 31

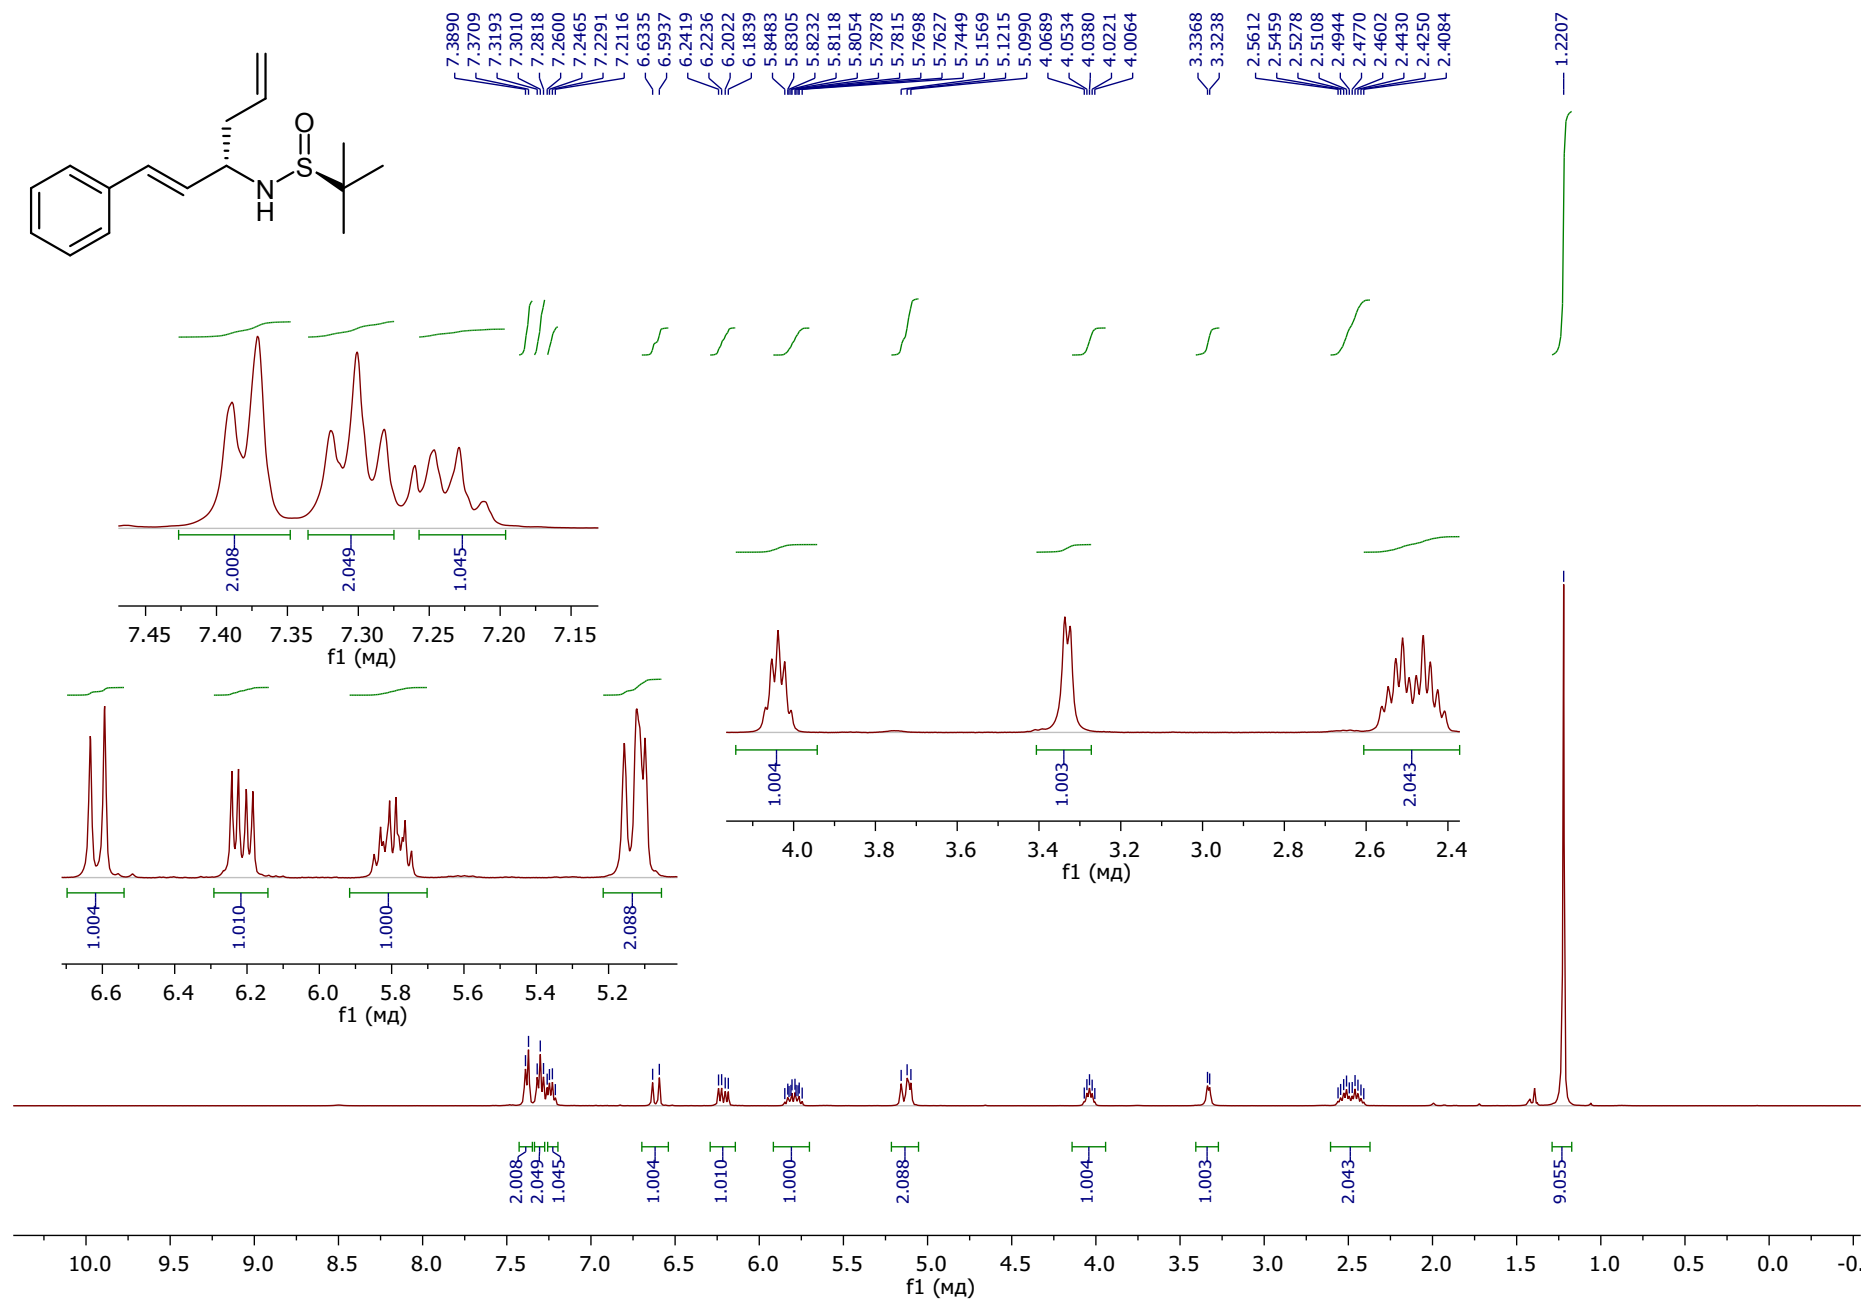

<sup>1</sup>H NMR (CDCl<sub>3</sub>, 400 MHz) **3m**

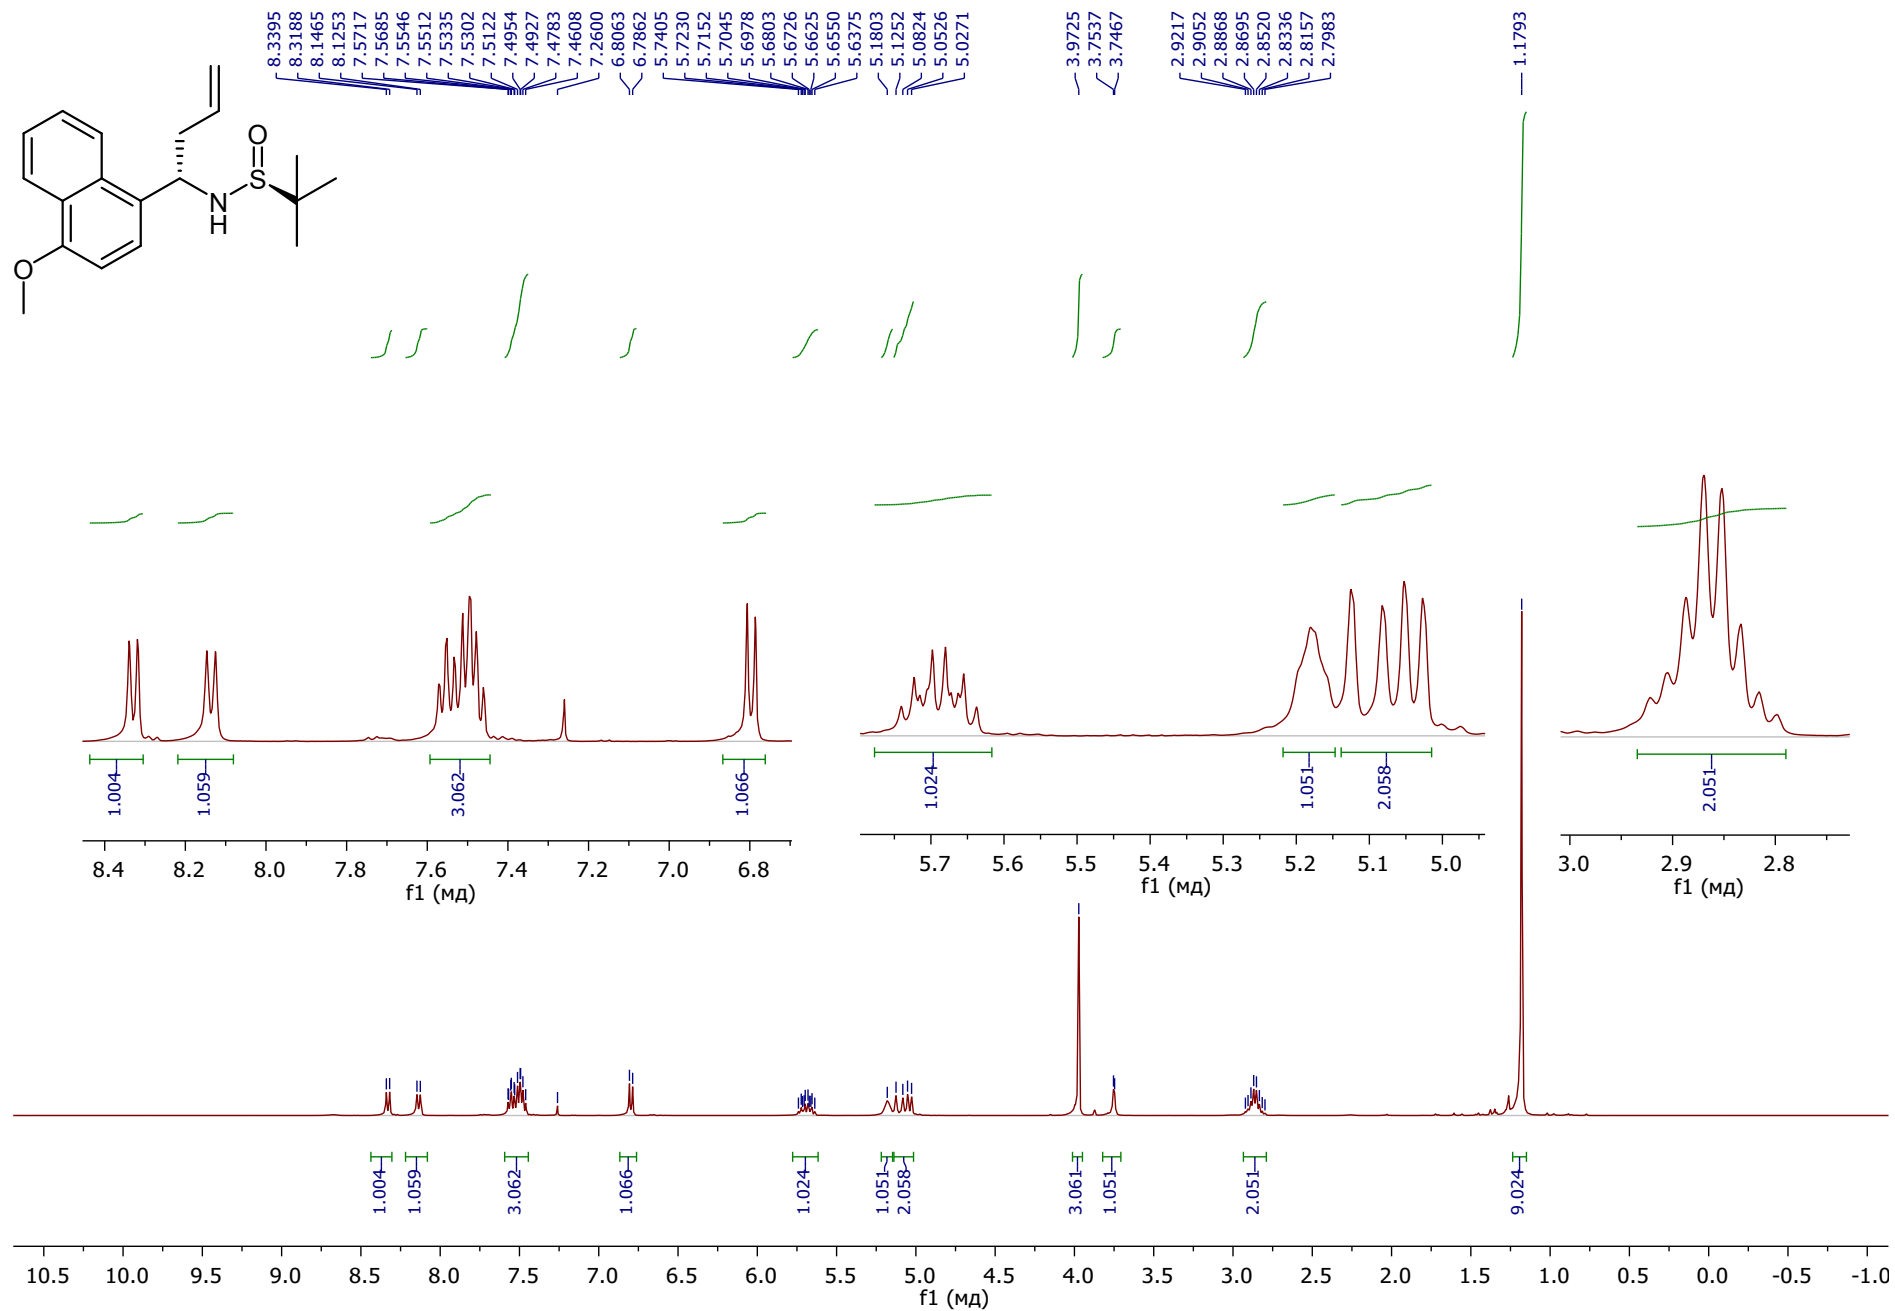

$^{13}\text{C}$  NMR ( $\text{CDCl}_3$ , 101 MHz) **3m**

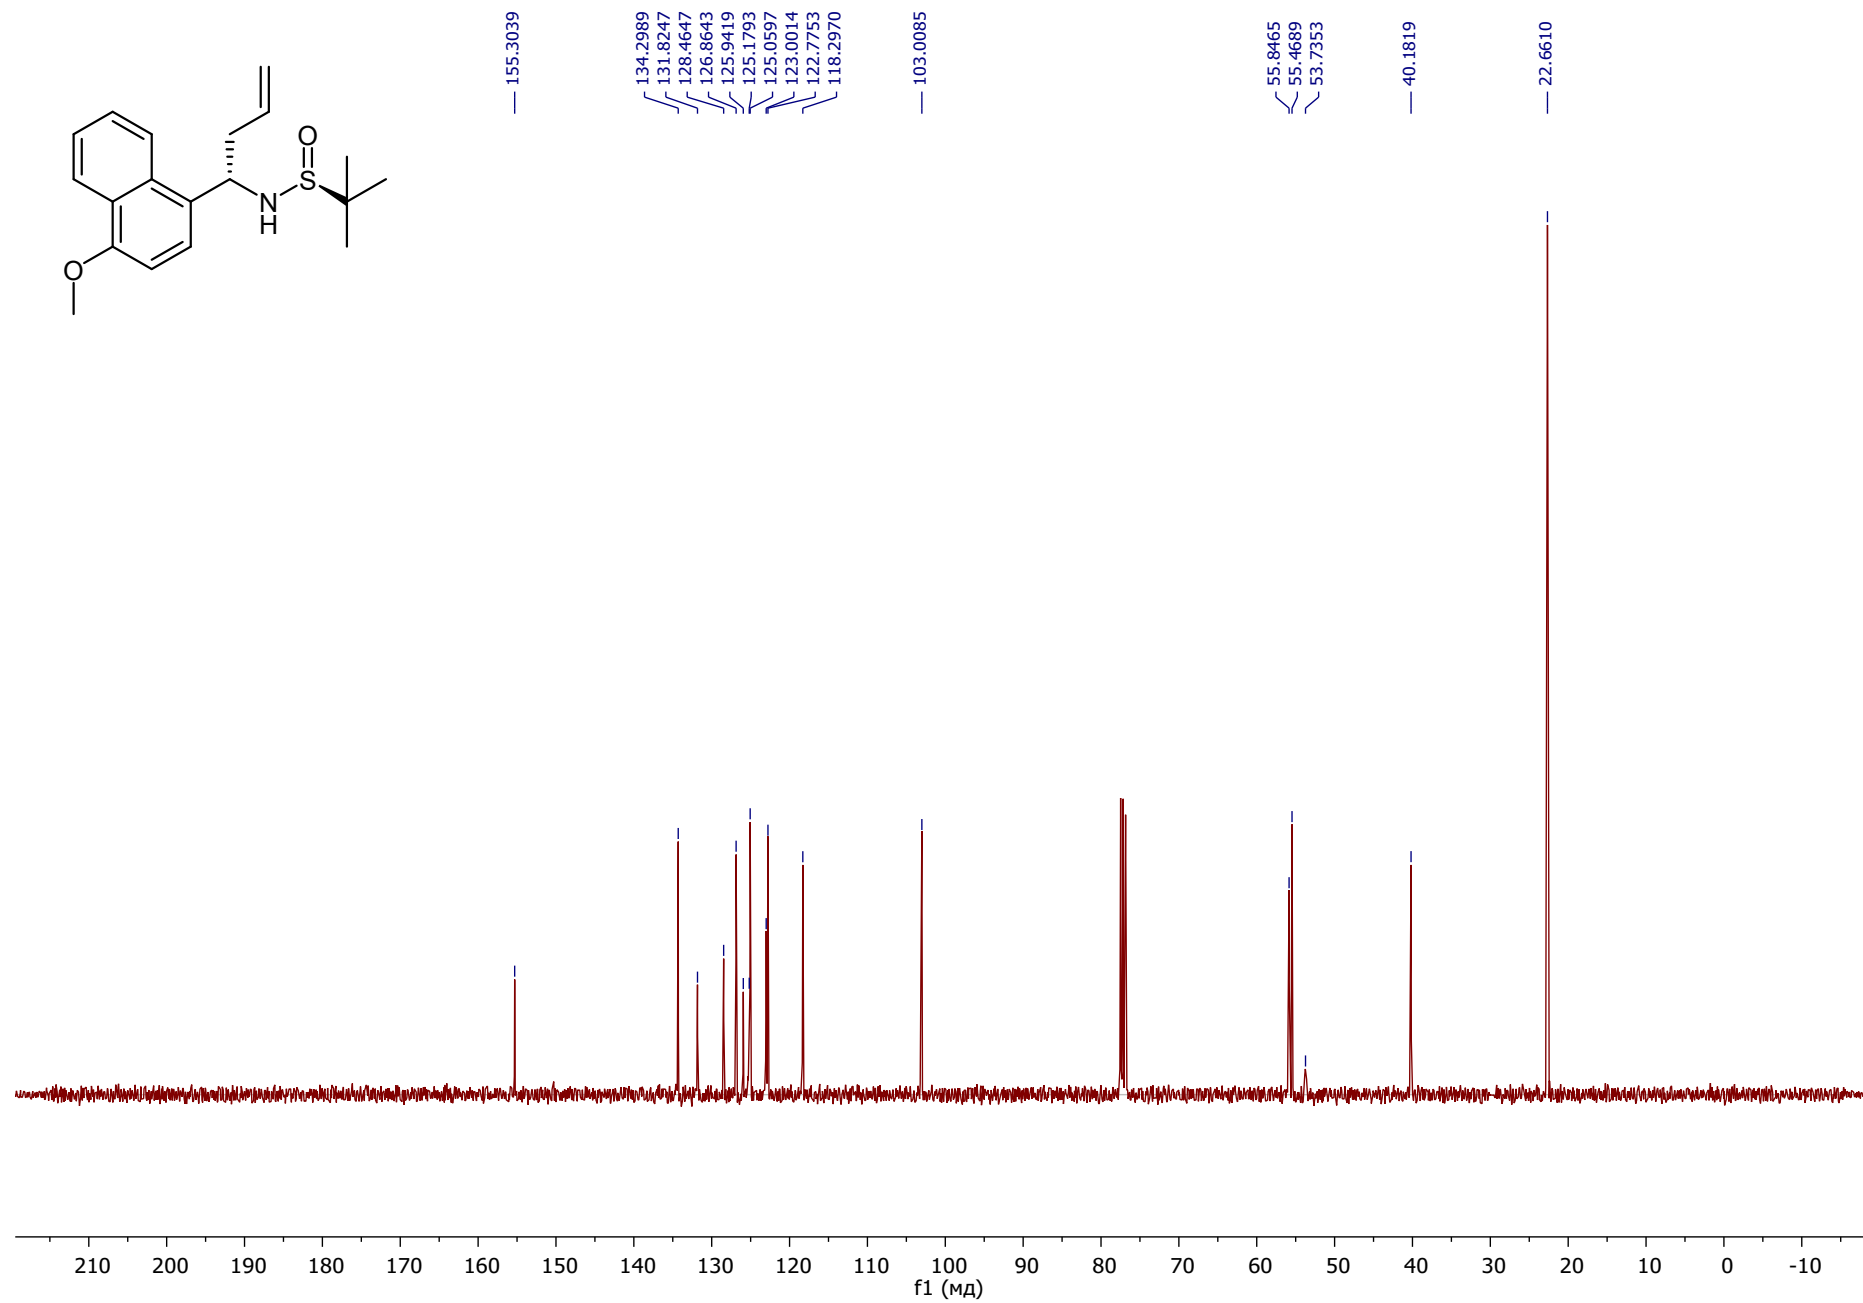

<sup>1</sup>H NMR (CDCl<sub>3</sub>, 400 MHz) **3n**

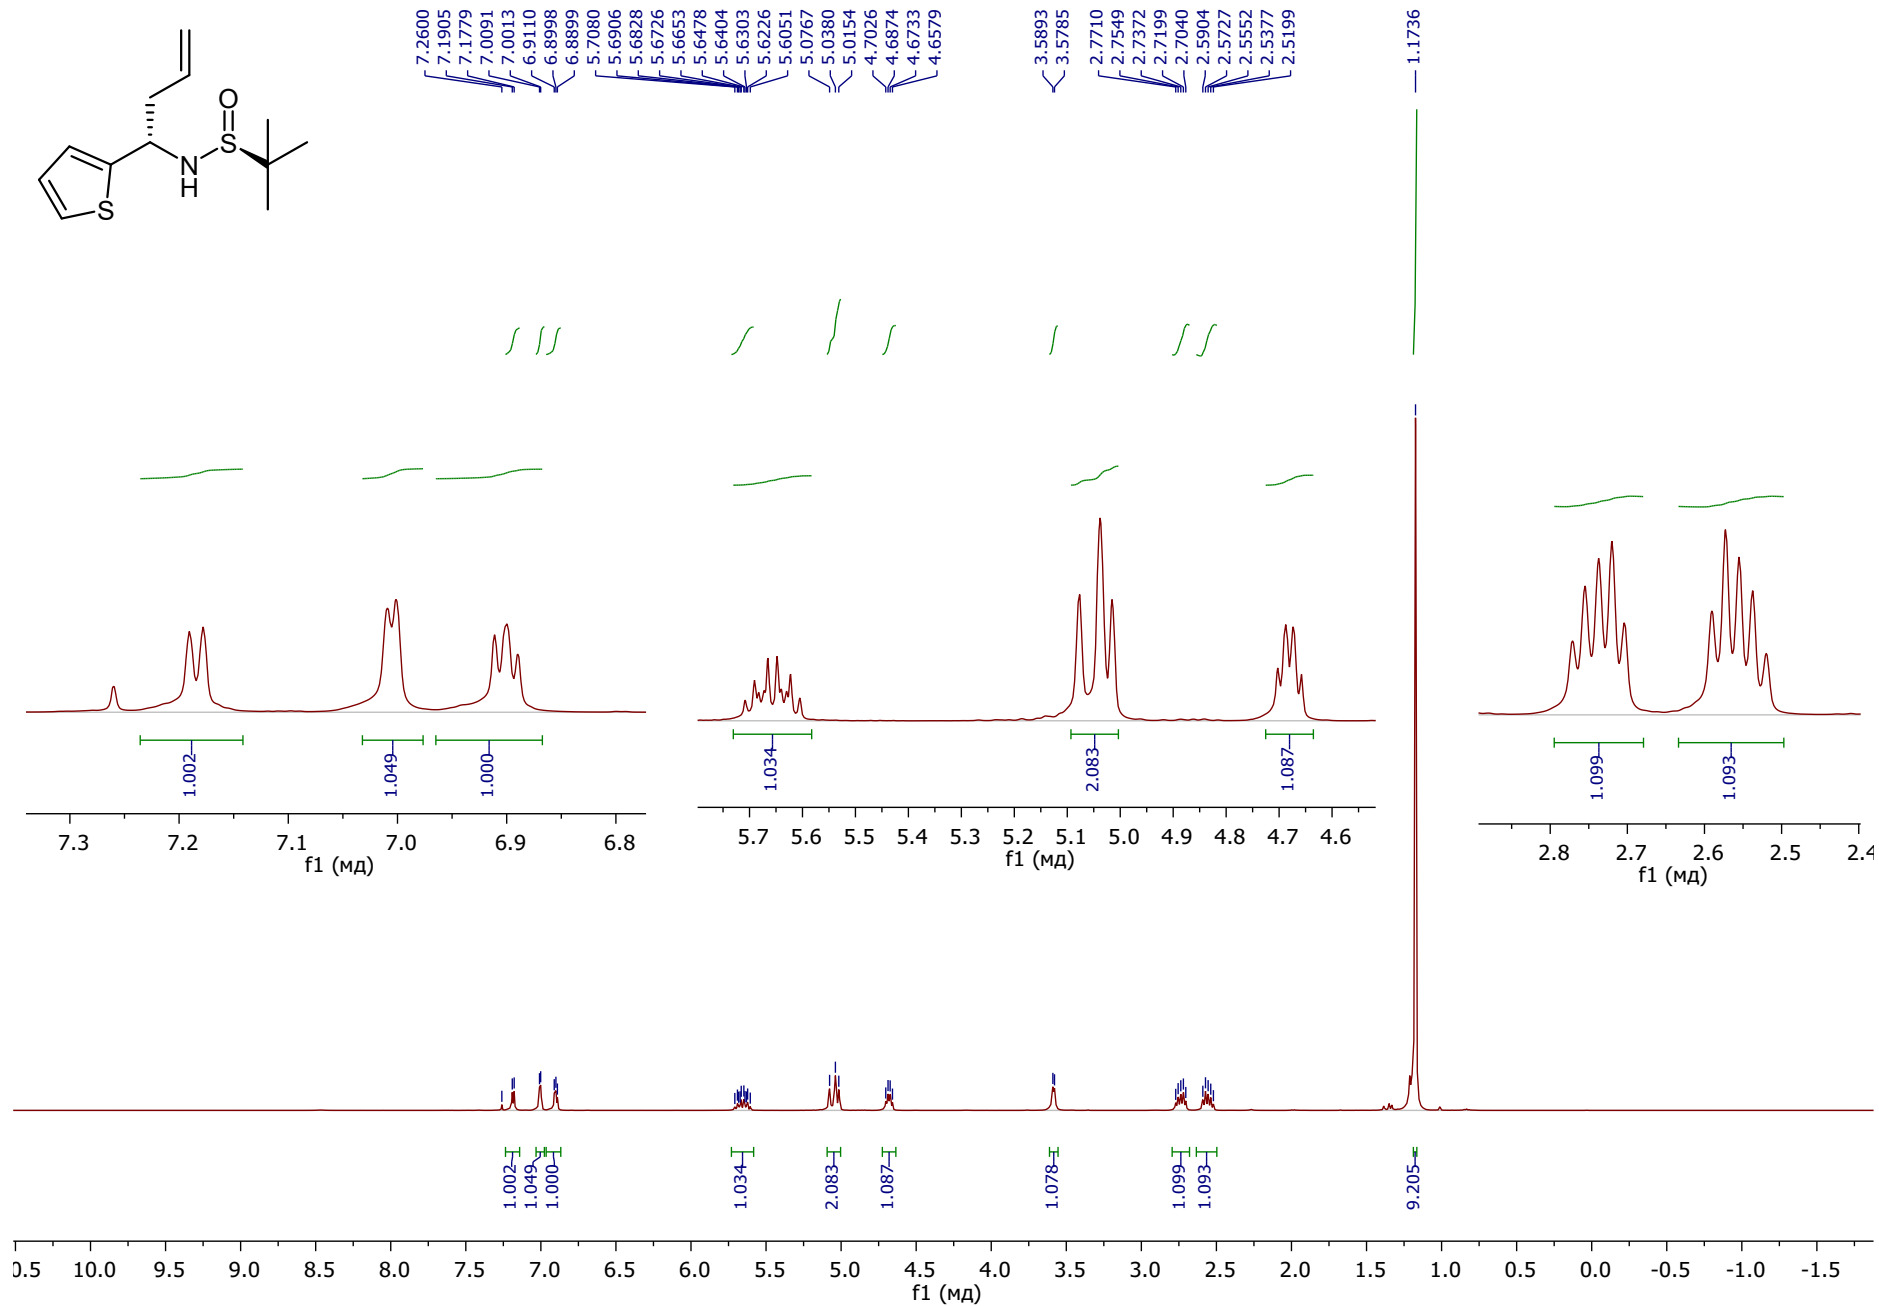



$^{13}\text{C}$  NMR ( $\text{CDCl}_3$ , 101 MHz) **3n**

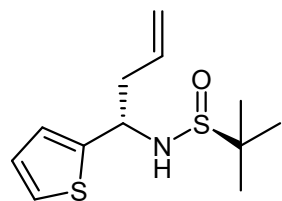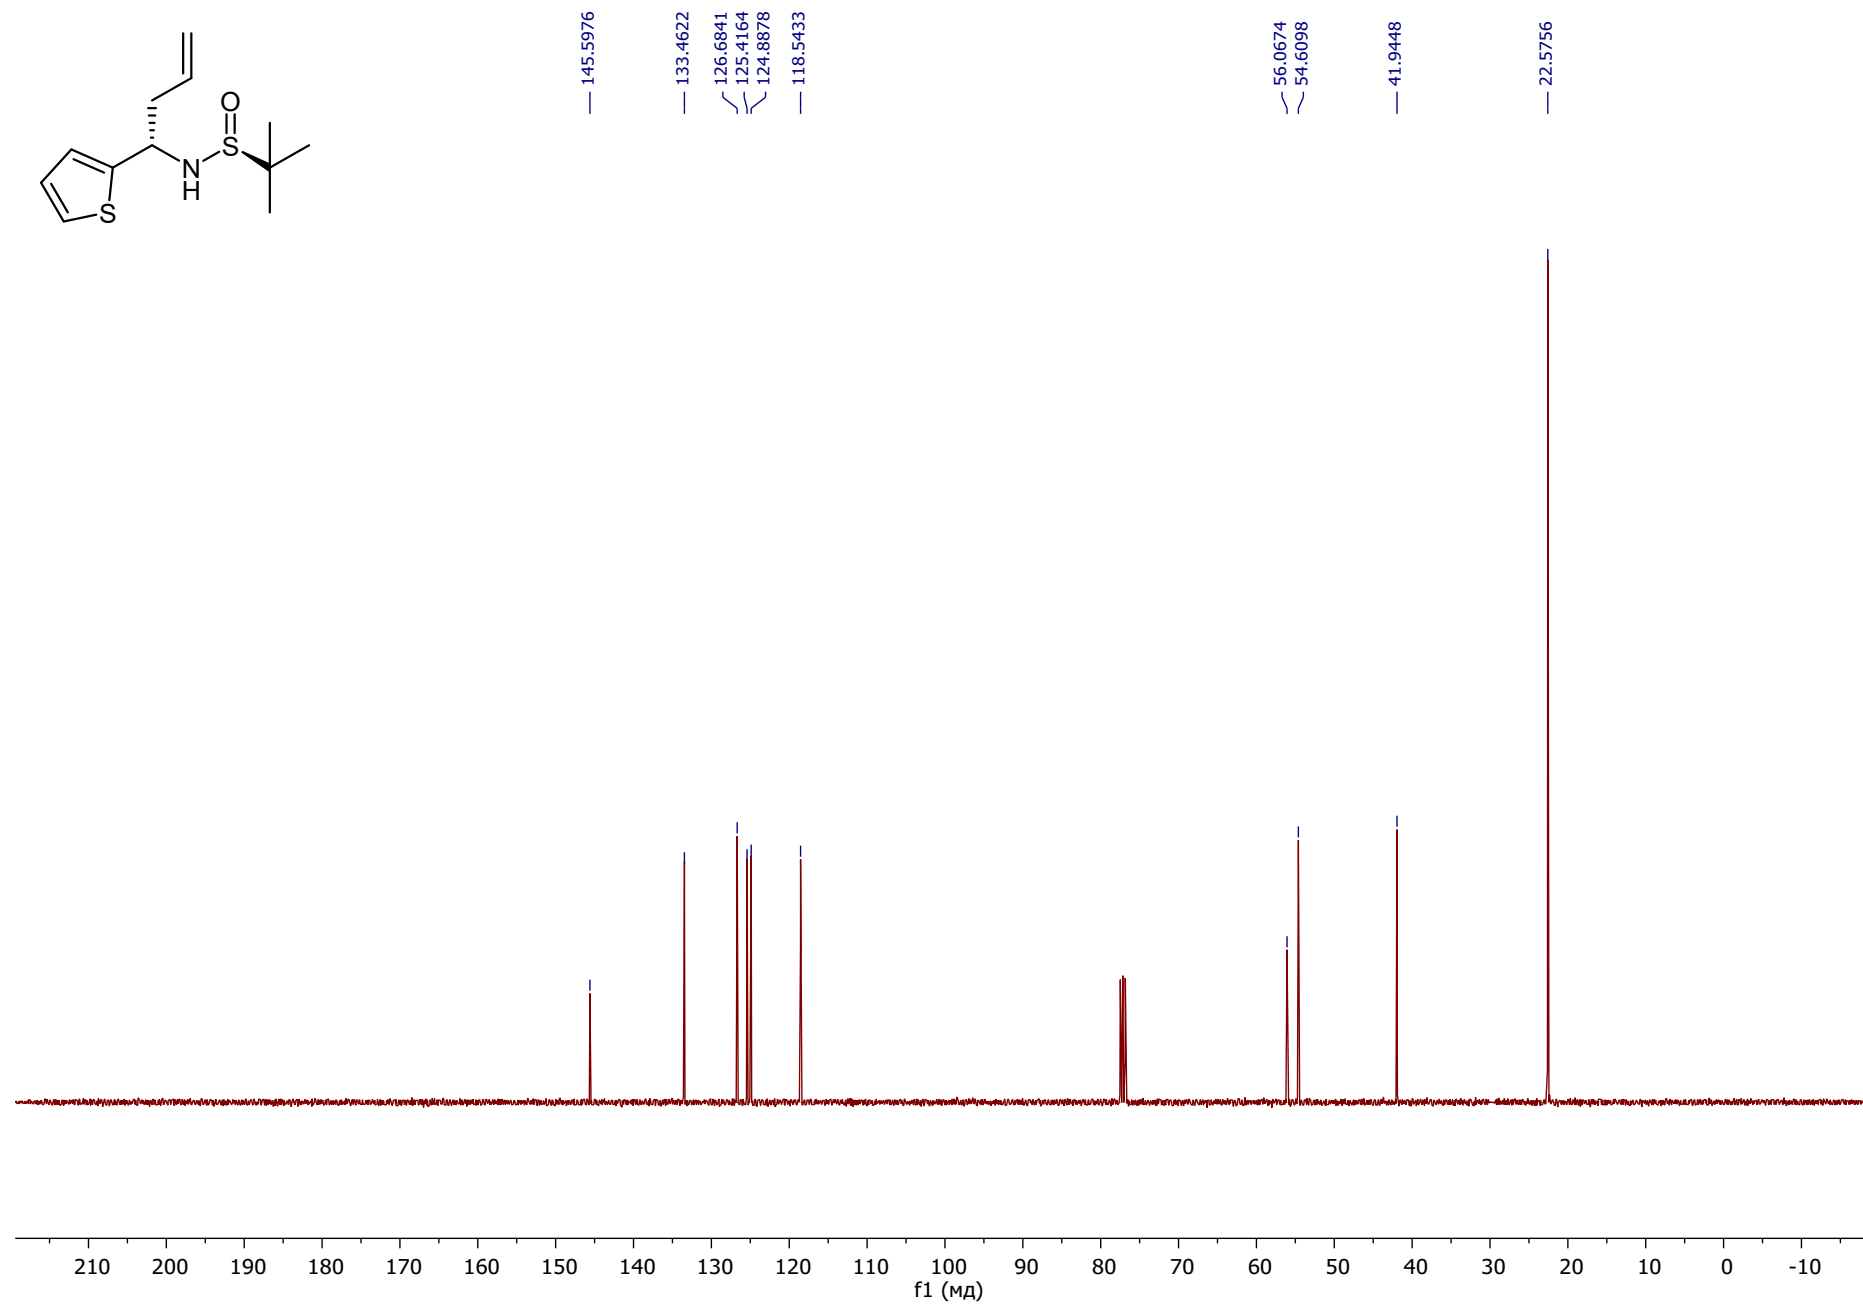

$^1\text{H}$  NMR ( $\text{CDCl}_3$ , 400 MHz) **3o**

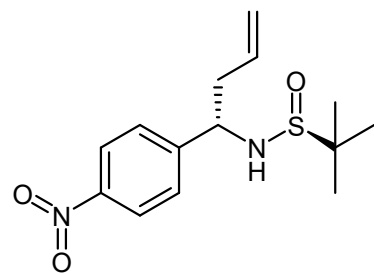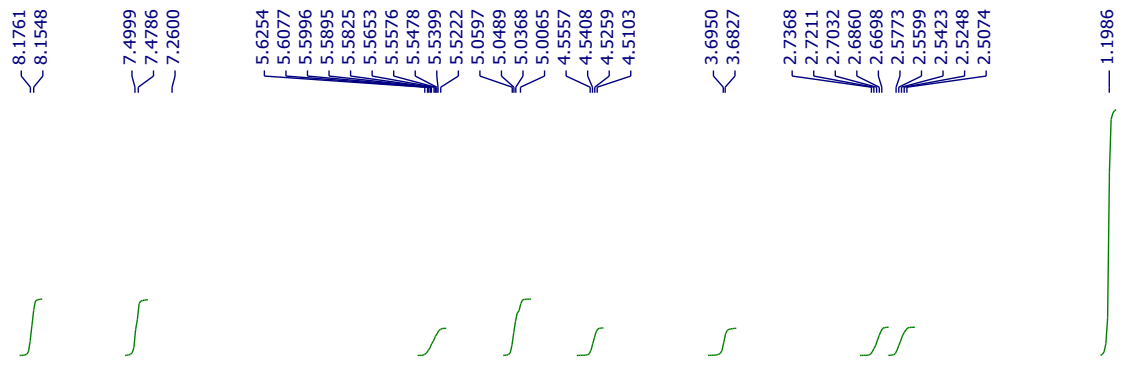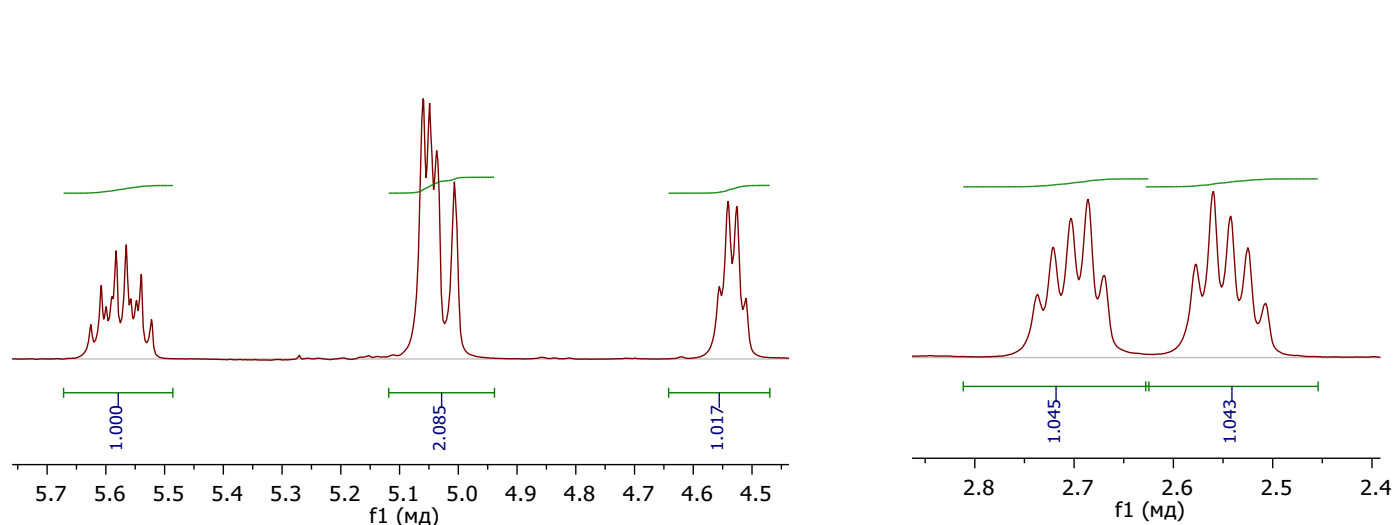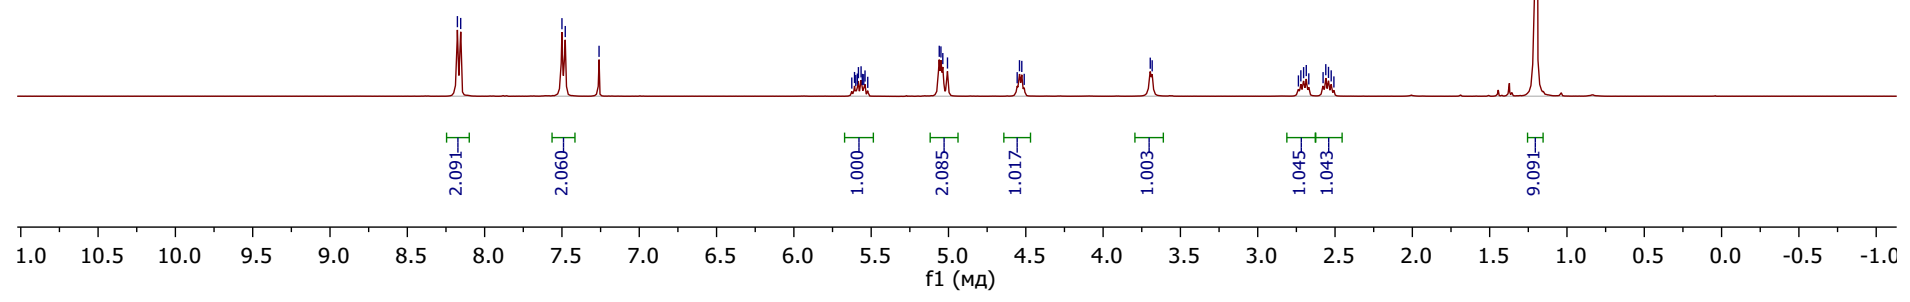

<sup>13</sup>C NMR (CDCl<sub>3</sub>, 101 MHz) **3o**

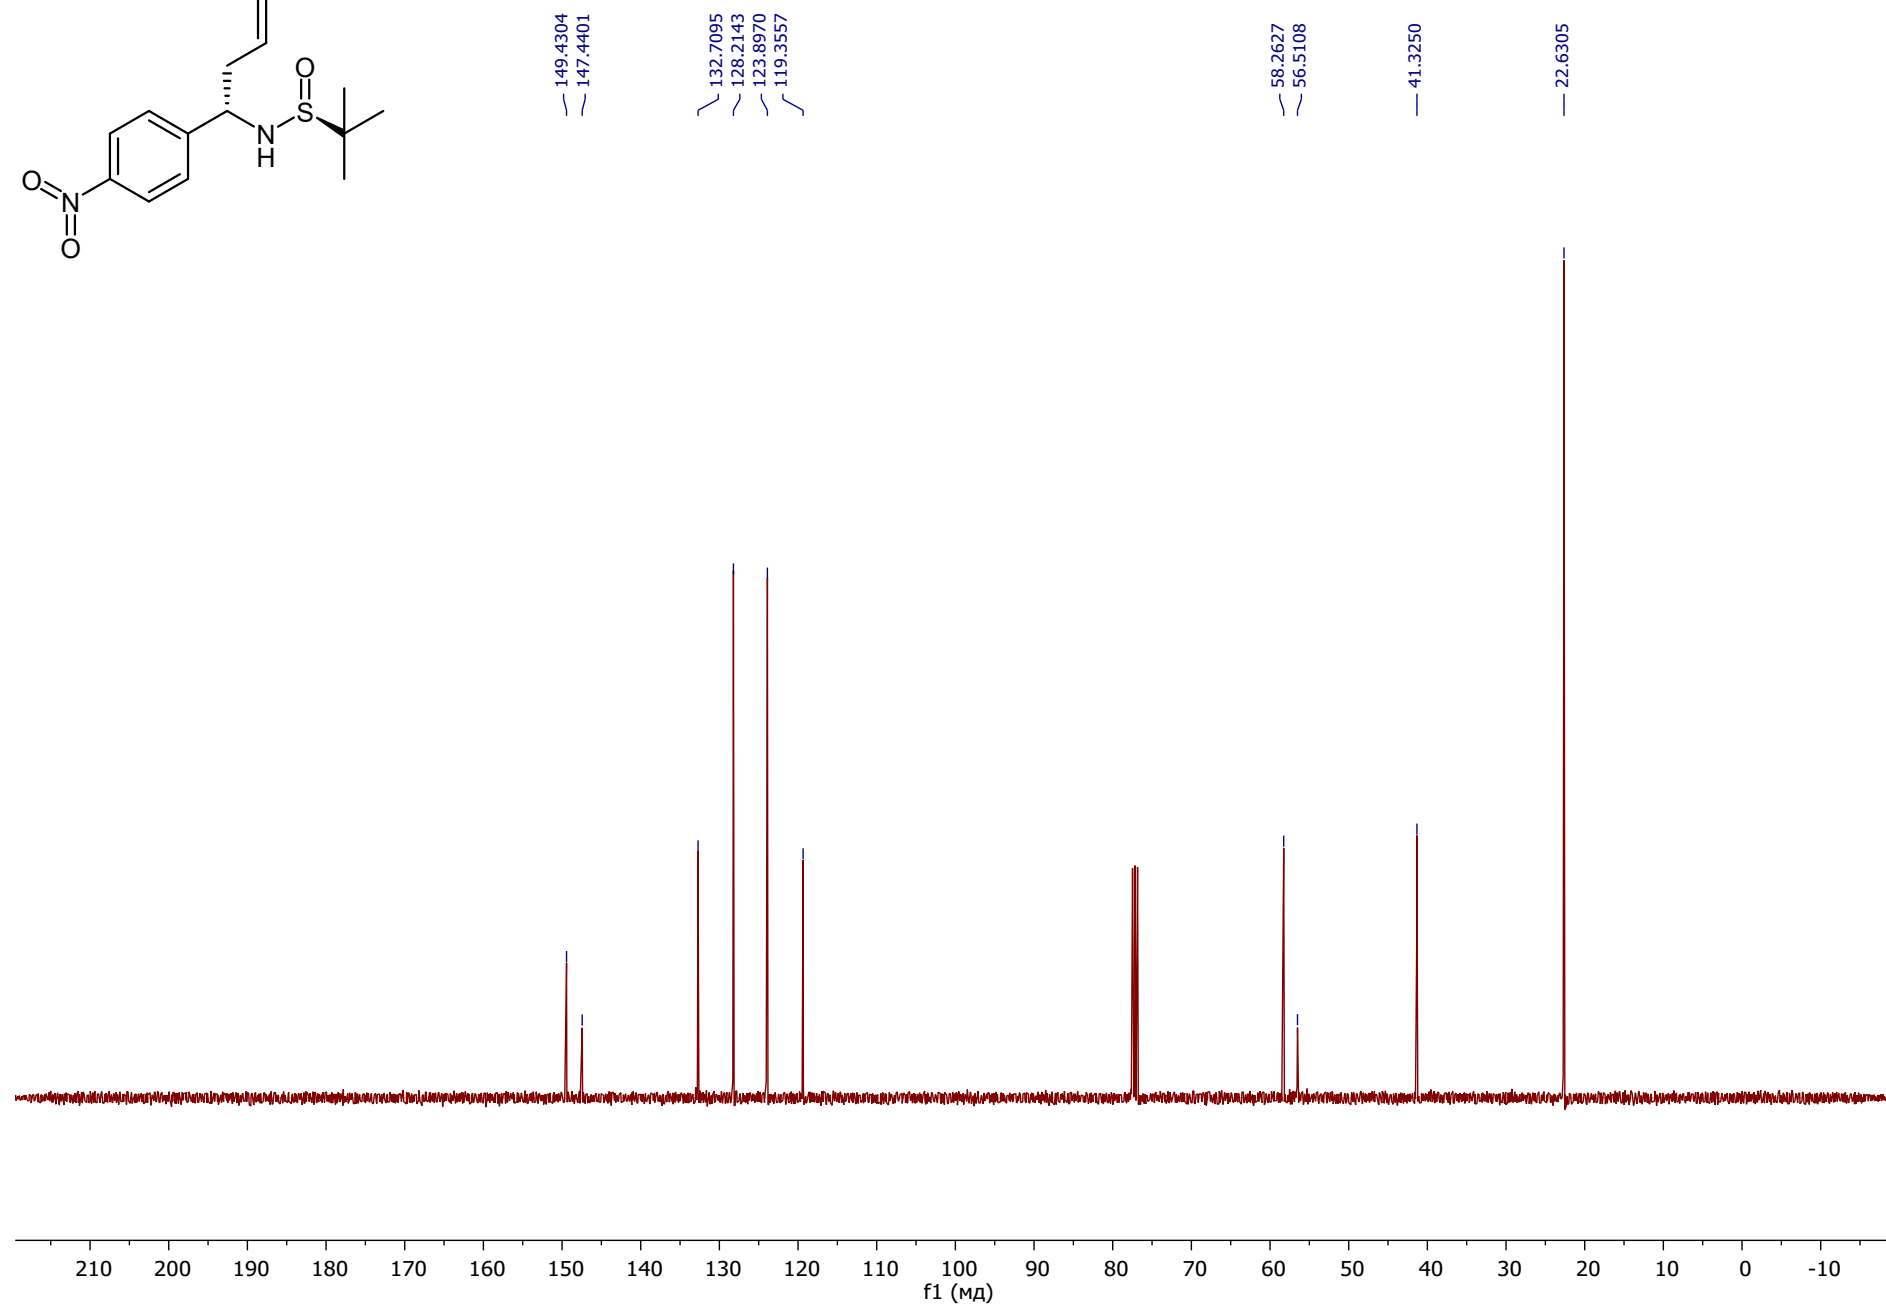

<sup>1</sup>H NMR (CDCl<sub>3</sub>, 400 MHz) **3p**

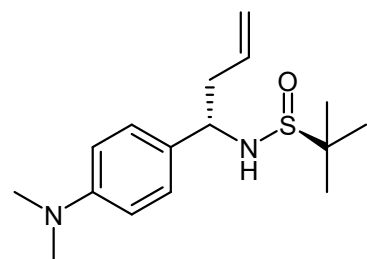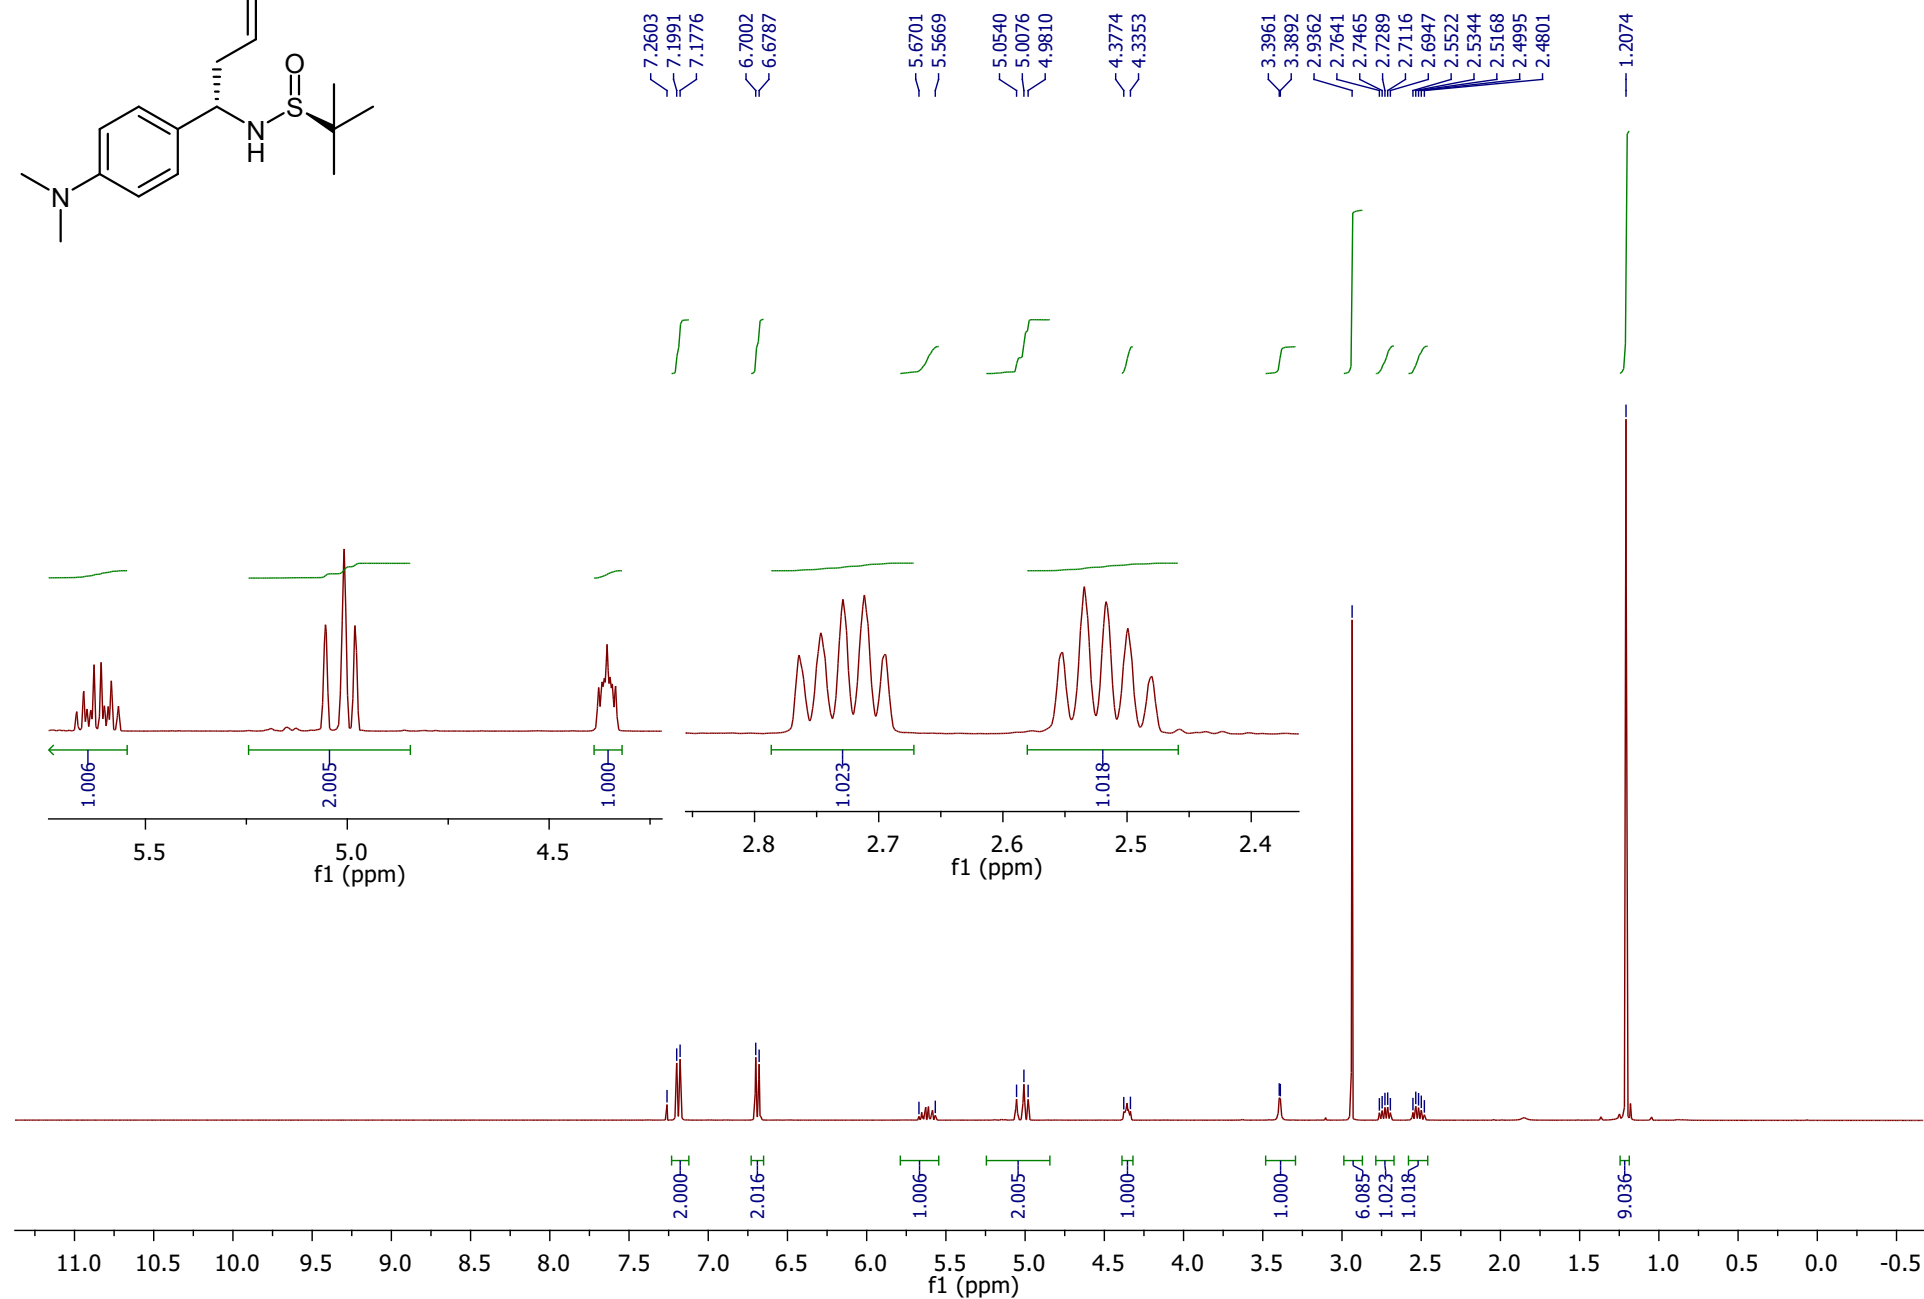

$^{13}\text{C}$  NMR (CDCl<sub>3</sub>, 101 MHz) **3p**

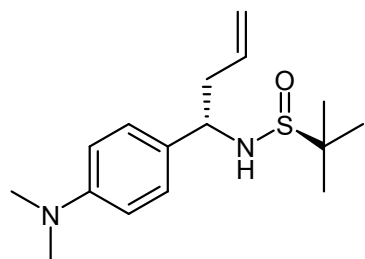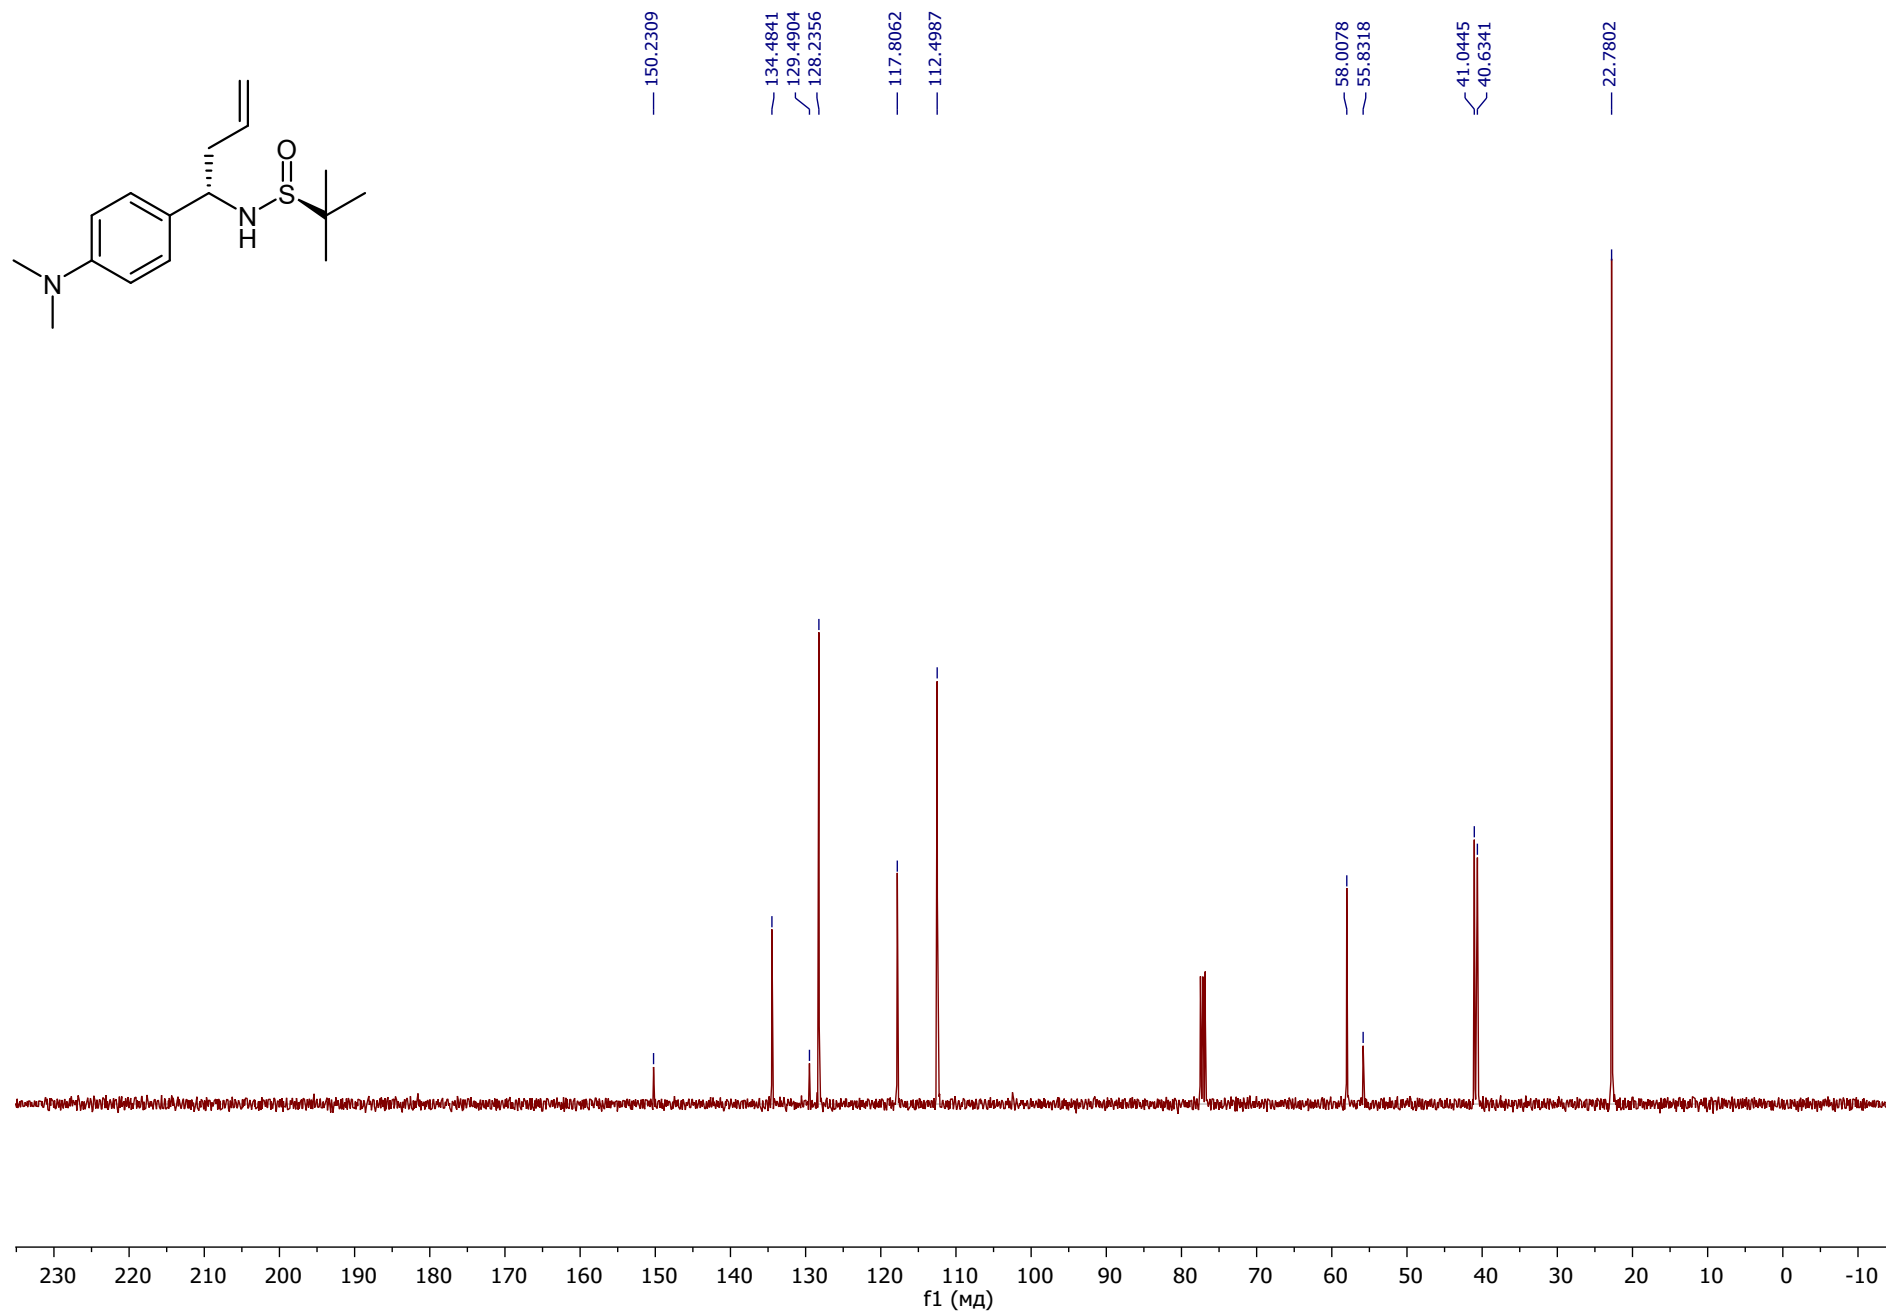

<sup>1</sup>H NMR (CDCl<sub>3</sub>, 400 MHz) **3q**

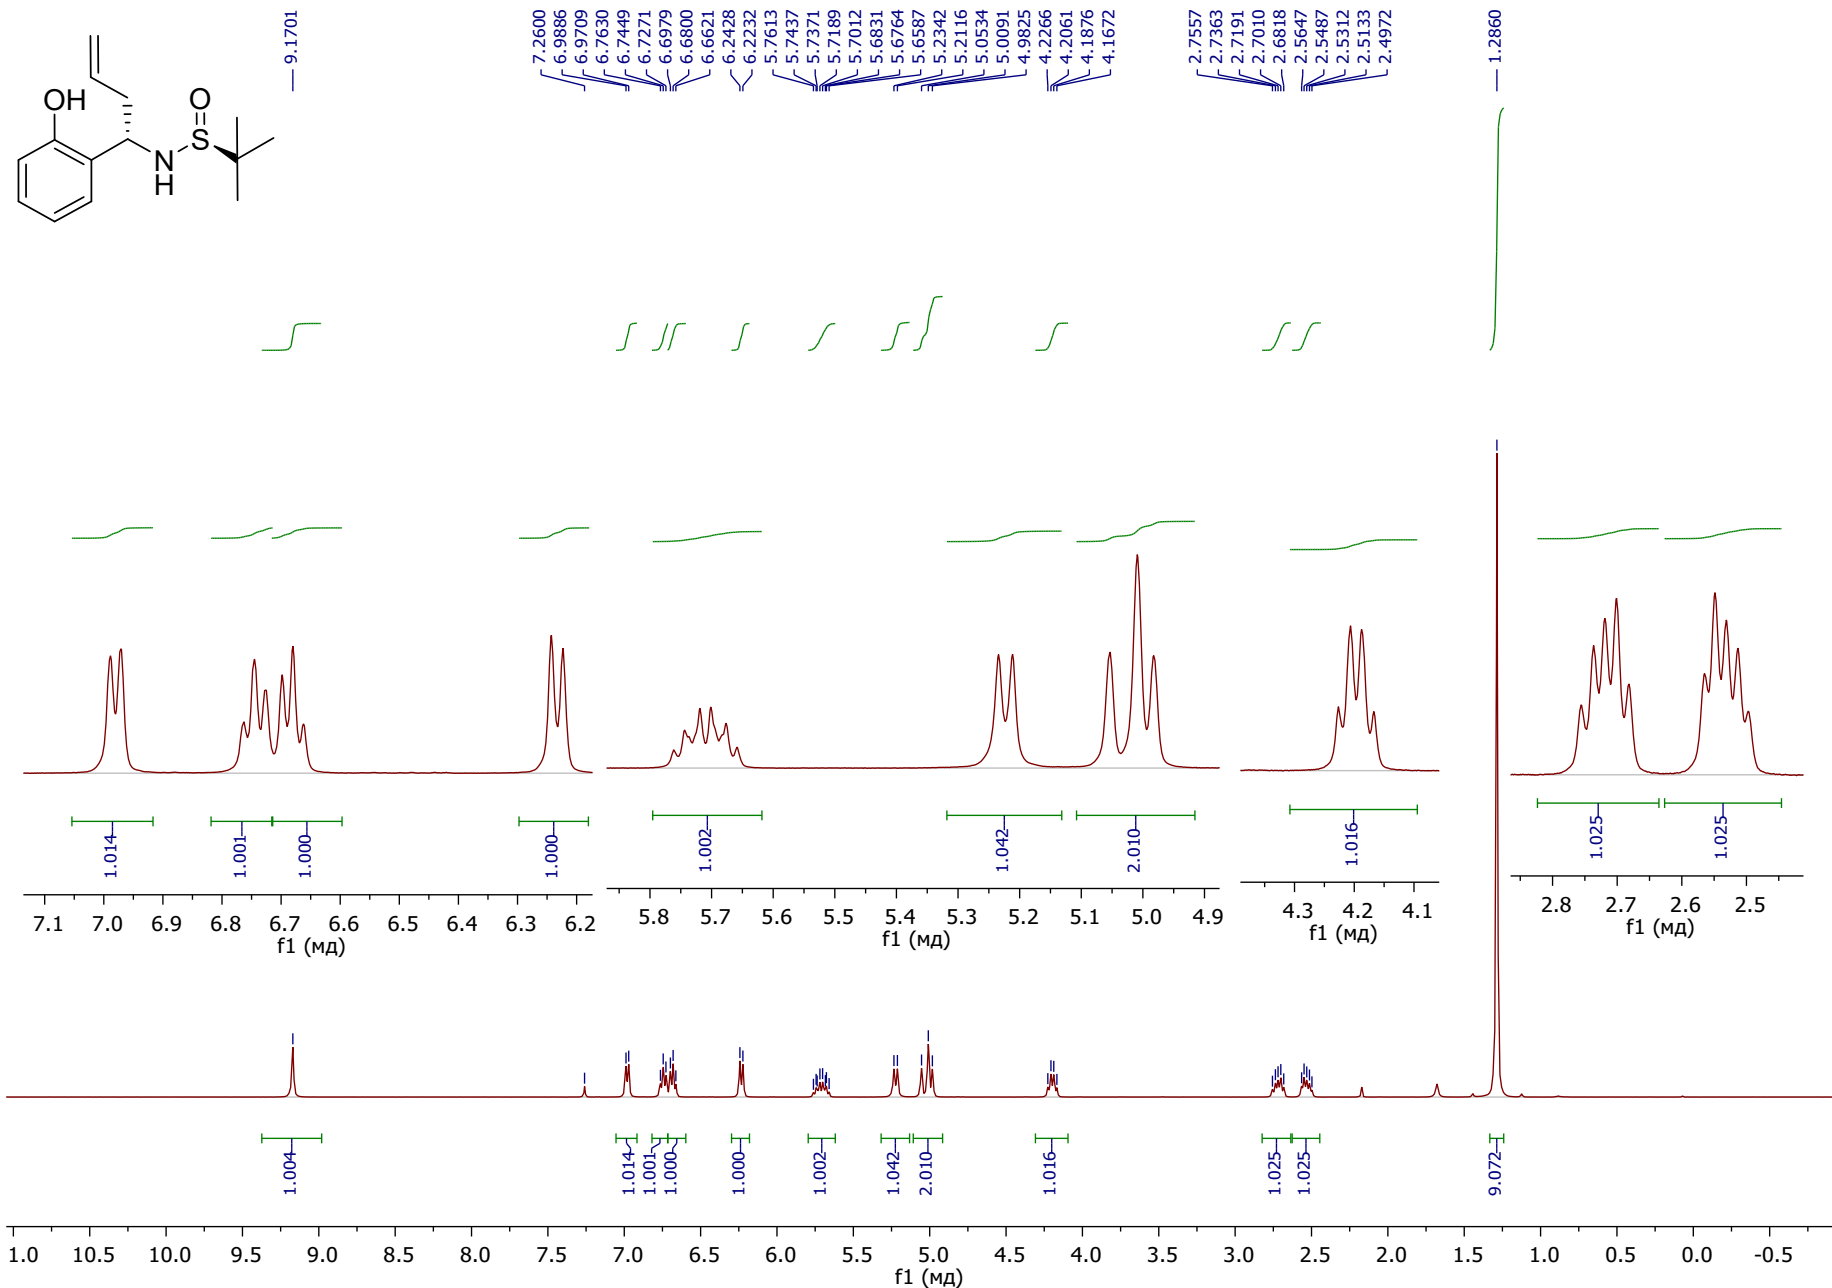

<sup>13</sup>C NMR (CDCl<sub>3</sub>, 101 MHz) **3q**

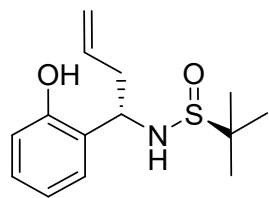

— 154.9018

— 135.7310

128.9426

127.8166

127.2893

118.9095

116.9971

116.7151

— 62.7854

— 56.7347

— 40.9554

— 22.9417

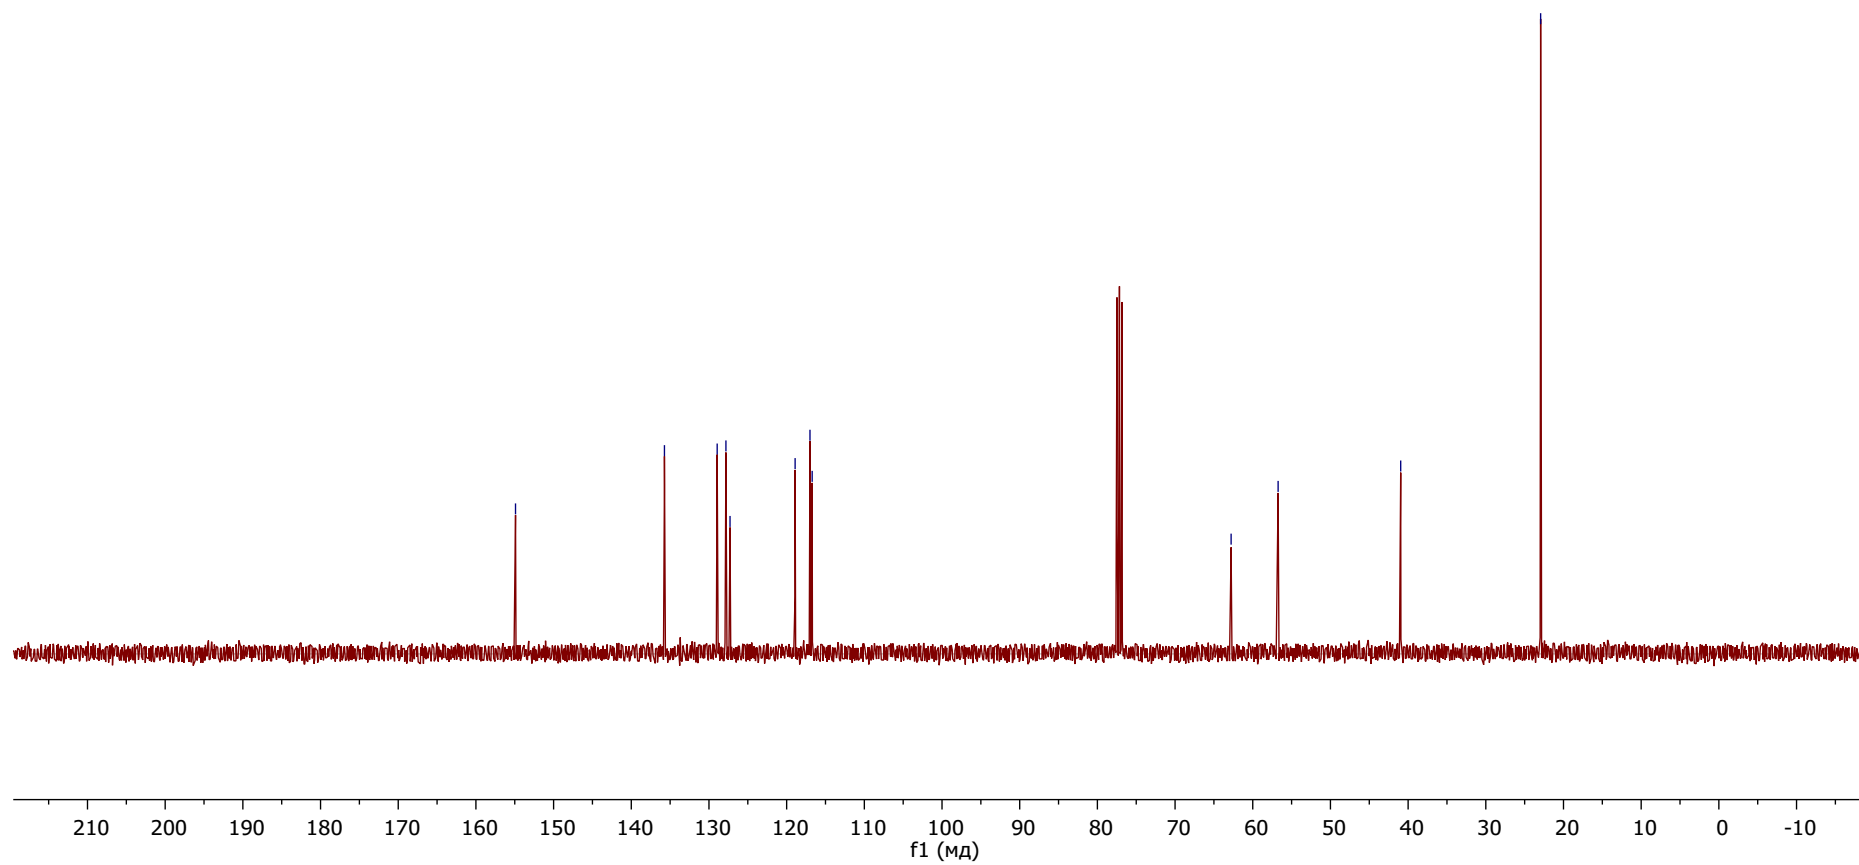

<sup>1</sup>H NMR (CDCl<sub>3</sub>, 400 MHz) **3r**

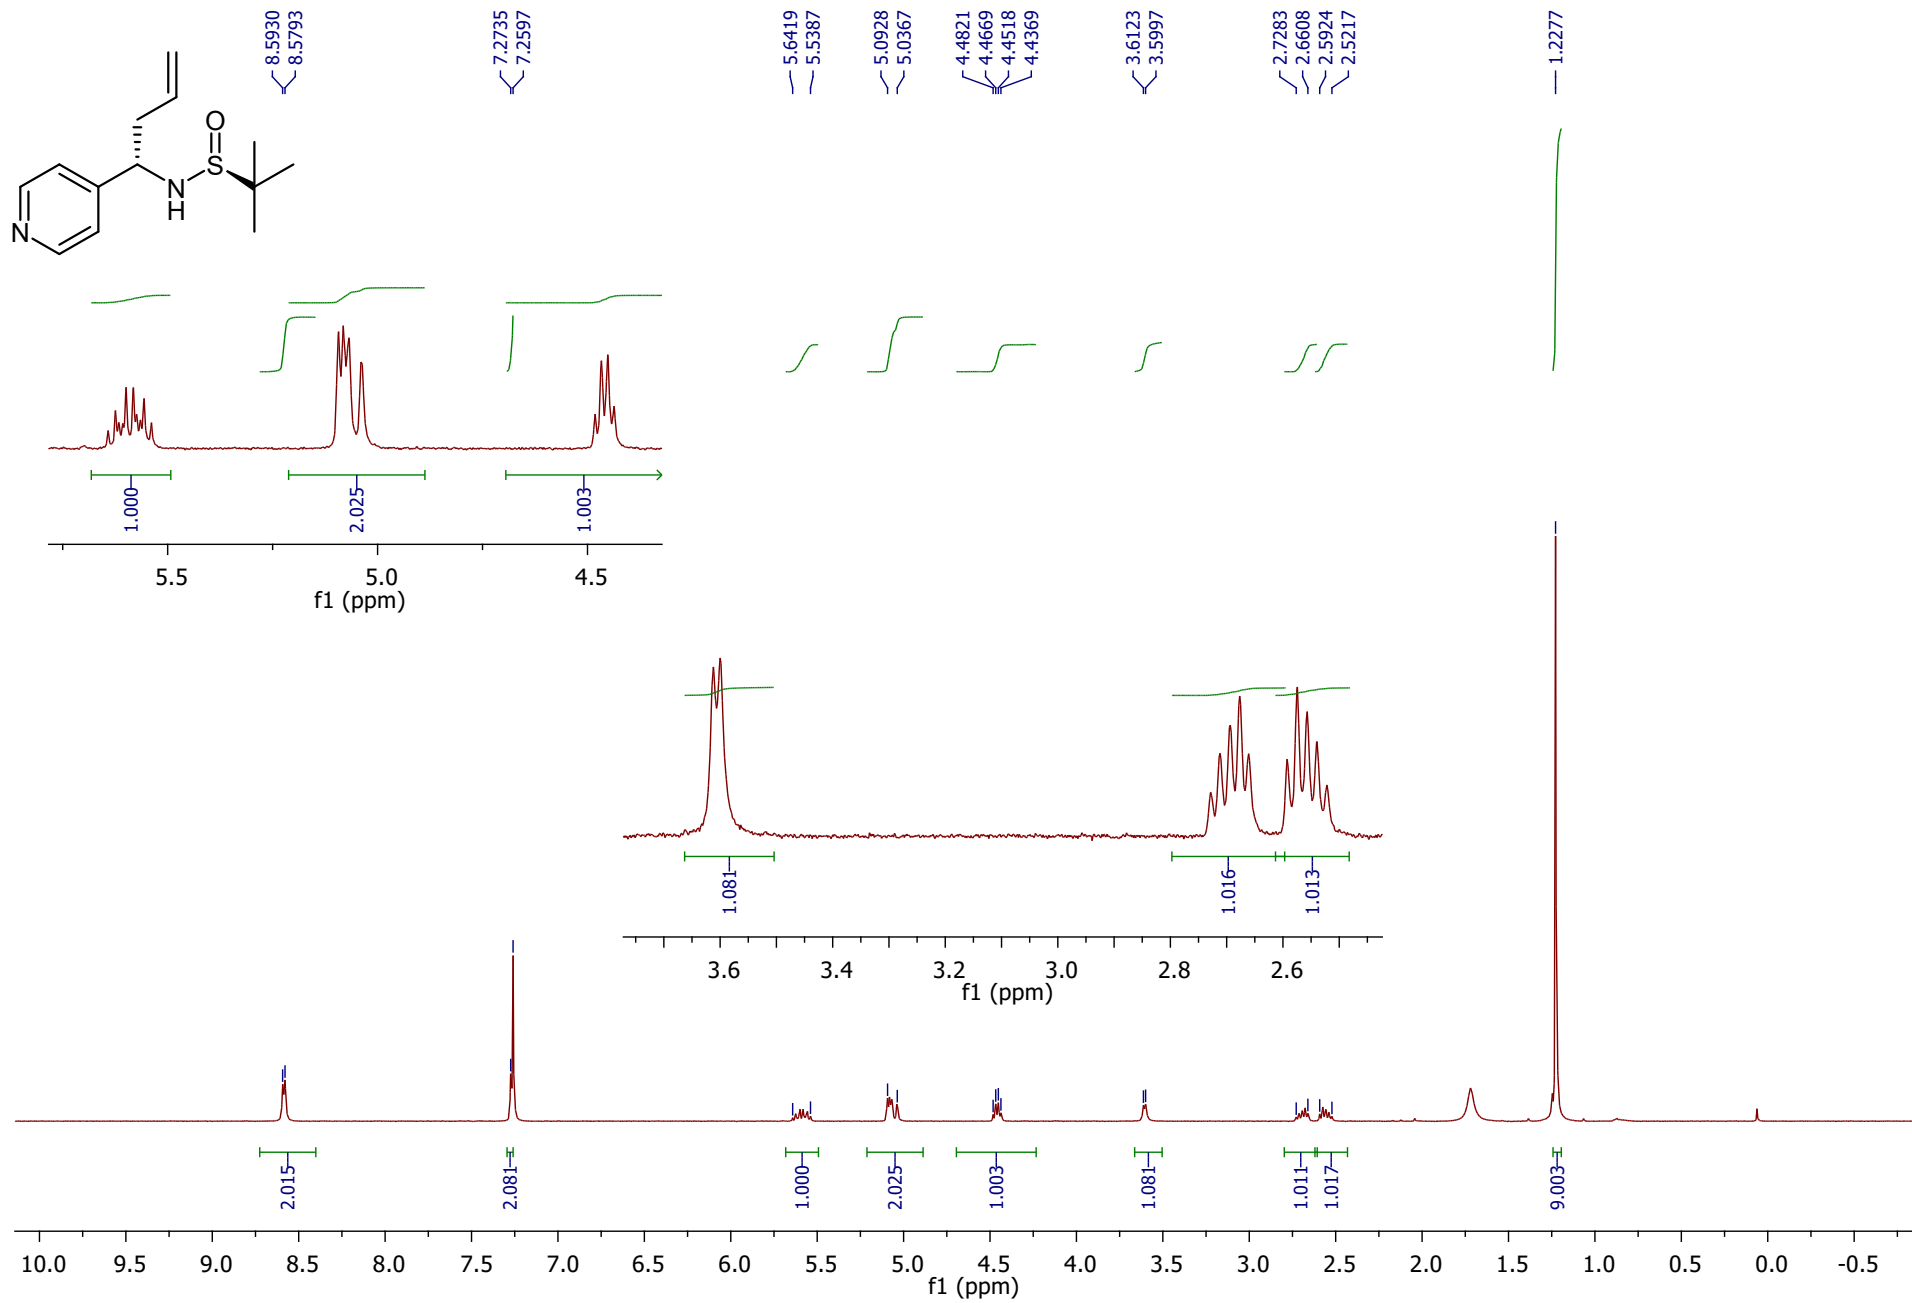



<sup>1</sup>H NMR (CDCl<sub>3</sub>, 400 MHz) **3s**

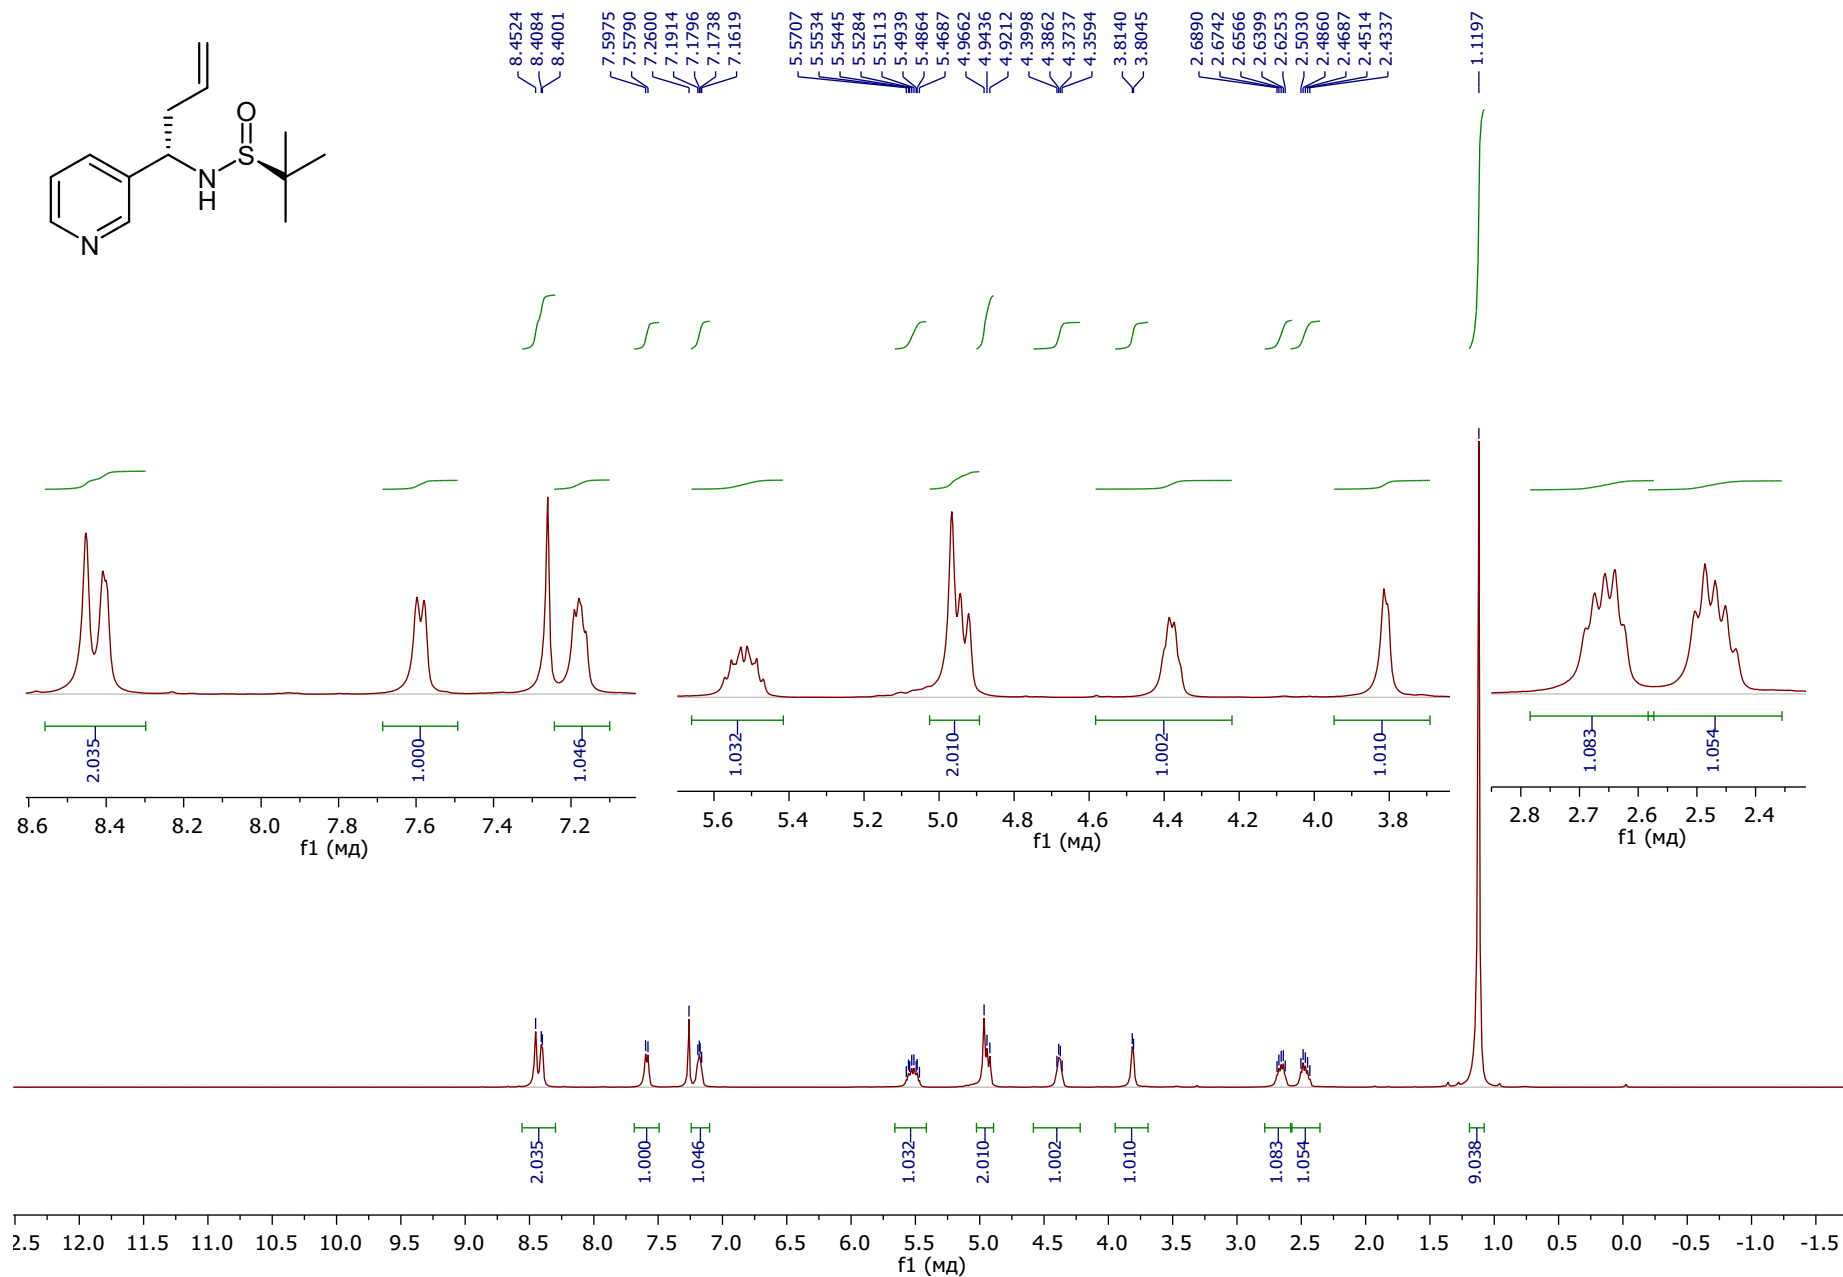

$^{13}\text{C}$  NMR ( $\text{CDCl}_3$ , 101 MHz) **3s**

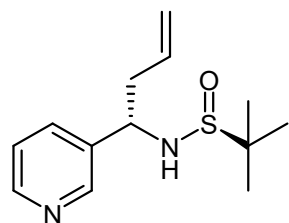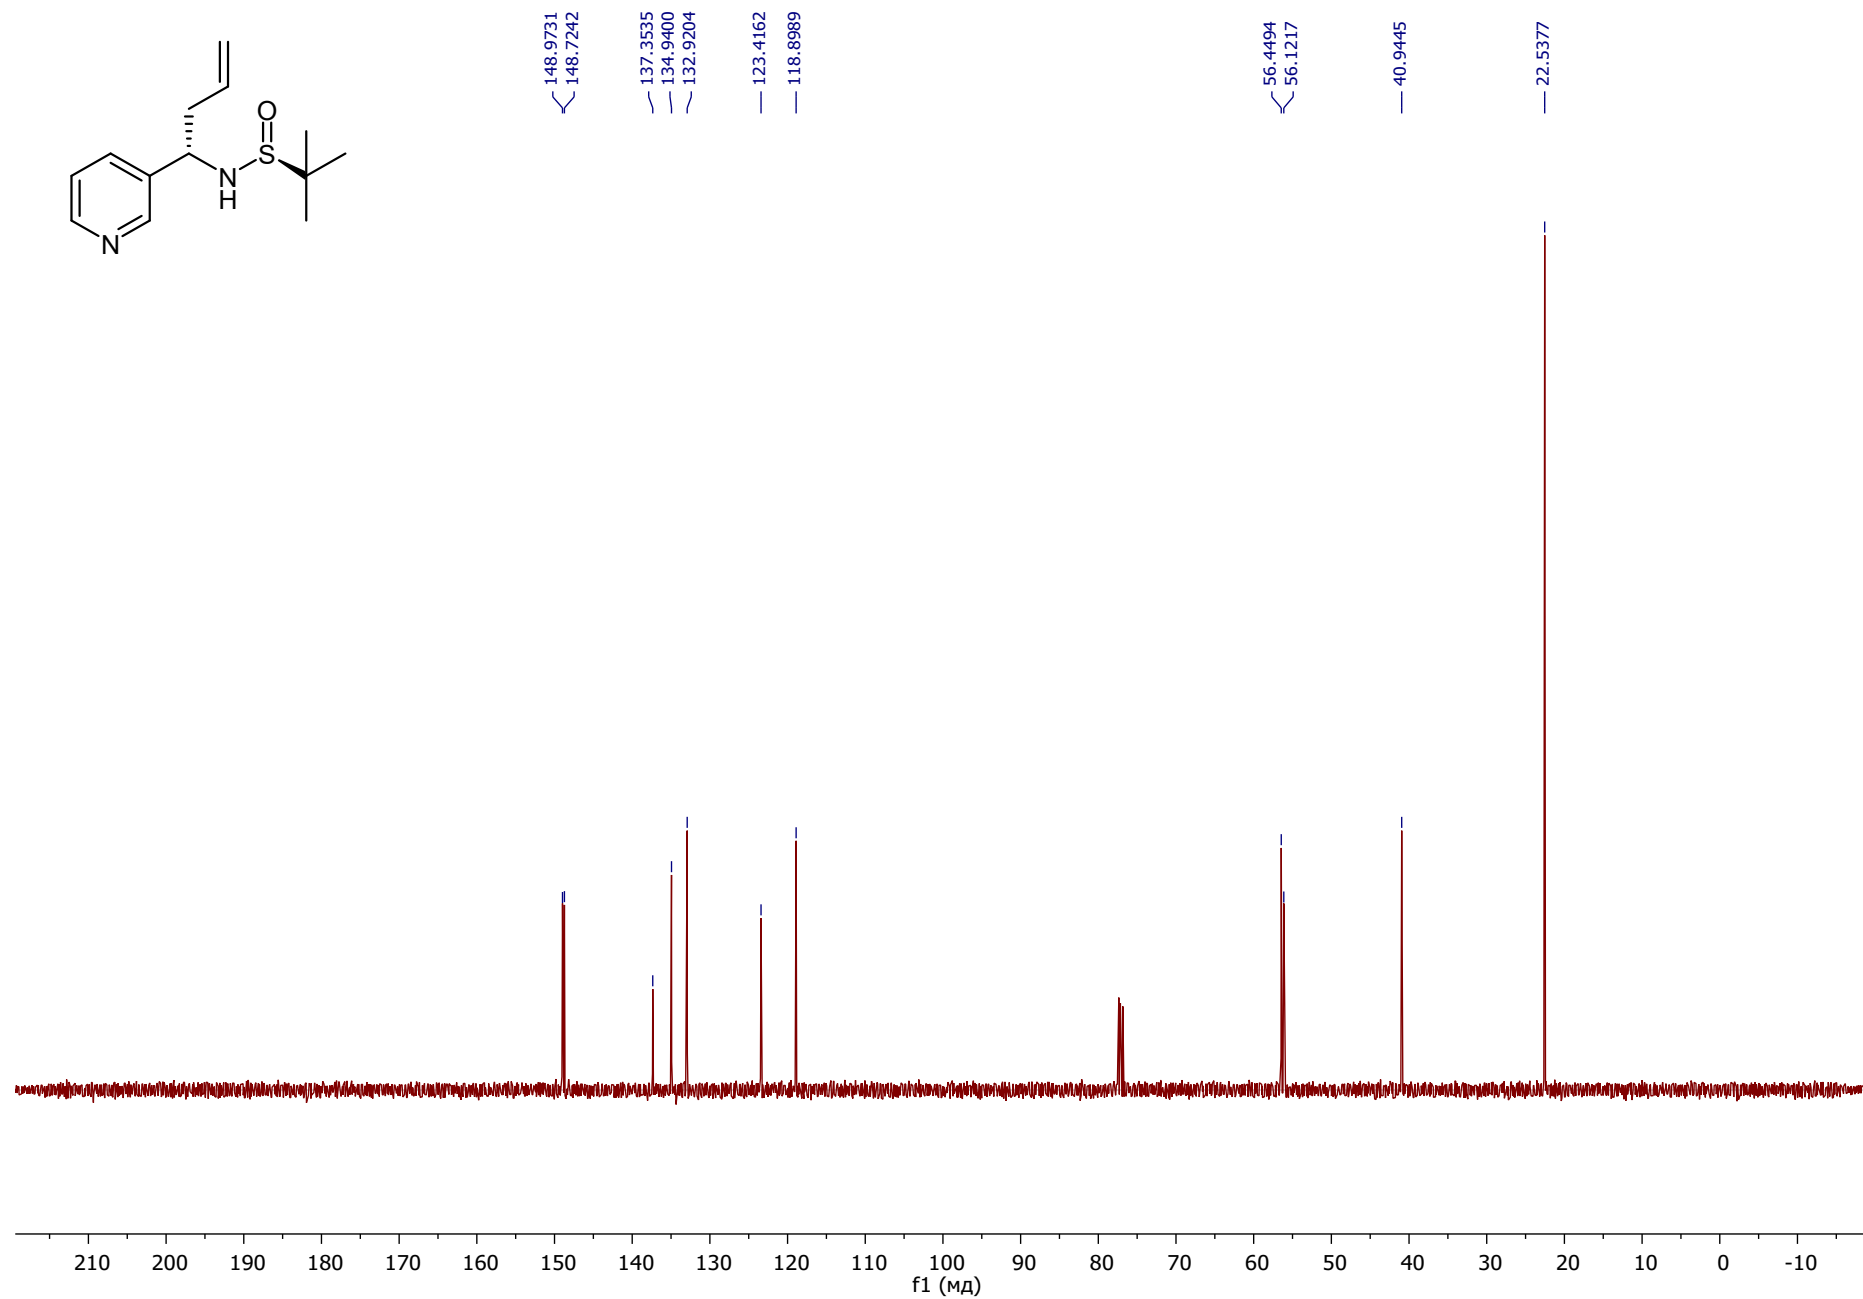

$^1\text{H}$  NMR ( $\text{CDCl}_3$ , 400 MHz) (*S,S*)-**3t**

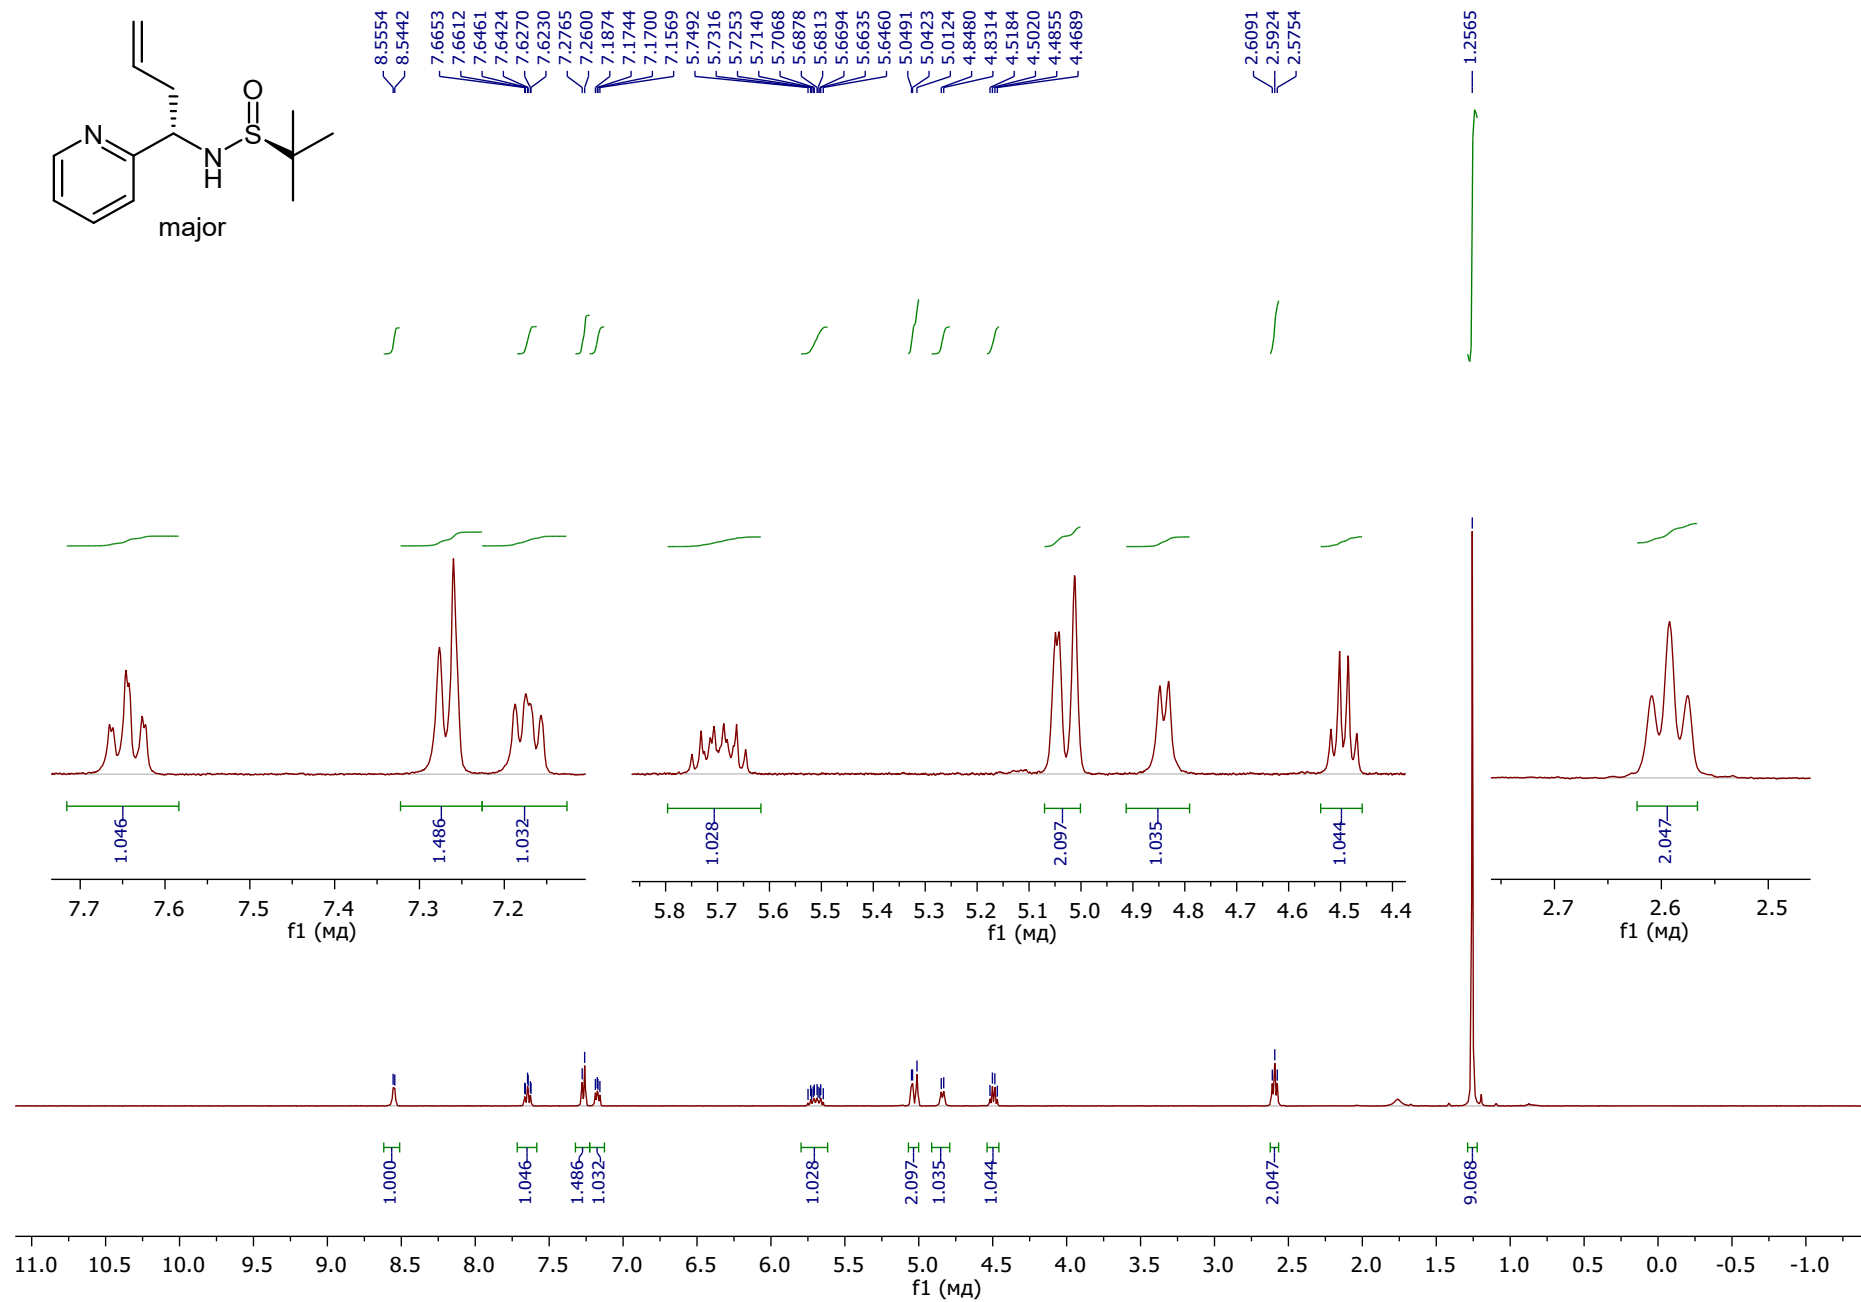

$^{13}\text{C}$  NMR ( $\text{CDCl}_3$ , 101 MHz) (*S,S*)-3t

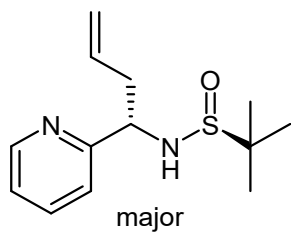

- 160.5474
- 149.1978
- 136.7200
- 134.1176
- 122.5294
- 121.9803
- 118.1023
- 60.1136
- 56.2497
- 42.2792
- 22.8942

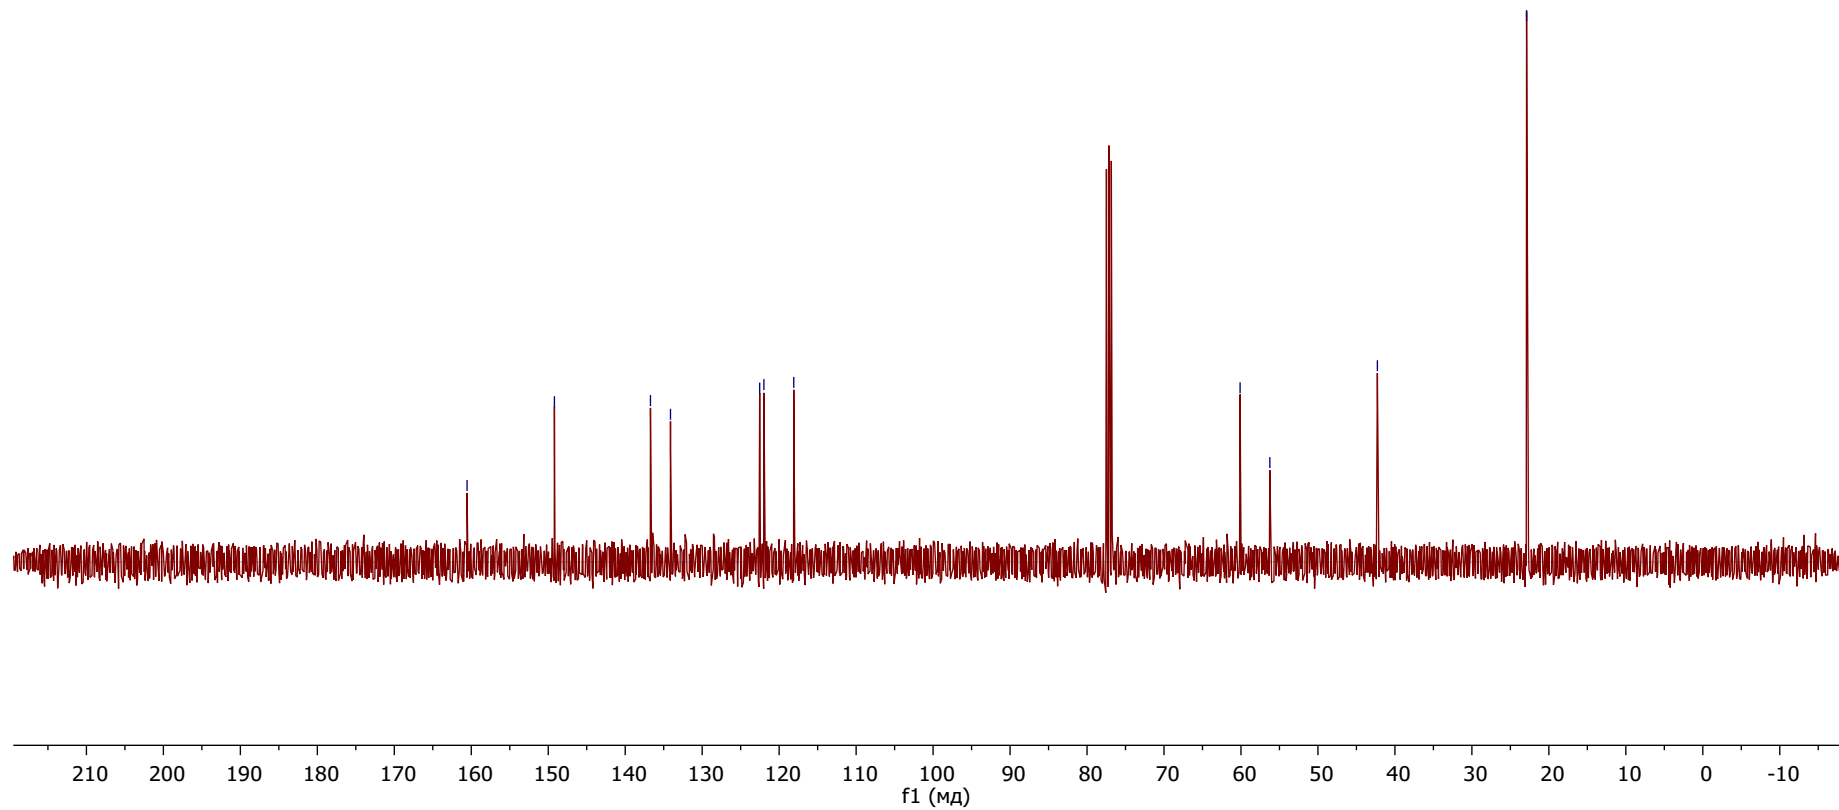

$^1\text{H}$  NMR ( $\text{CDCl}_3$ , 400 MHz) (*S*,*R*)-3t

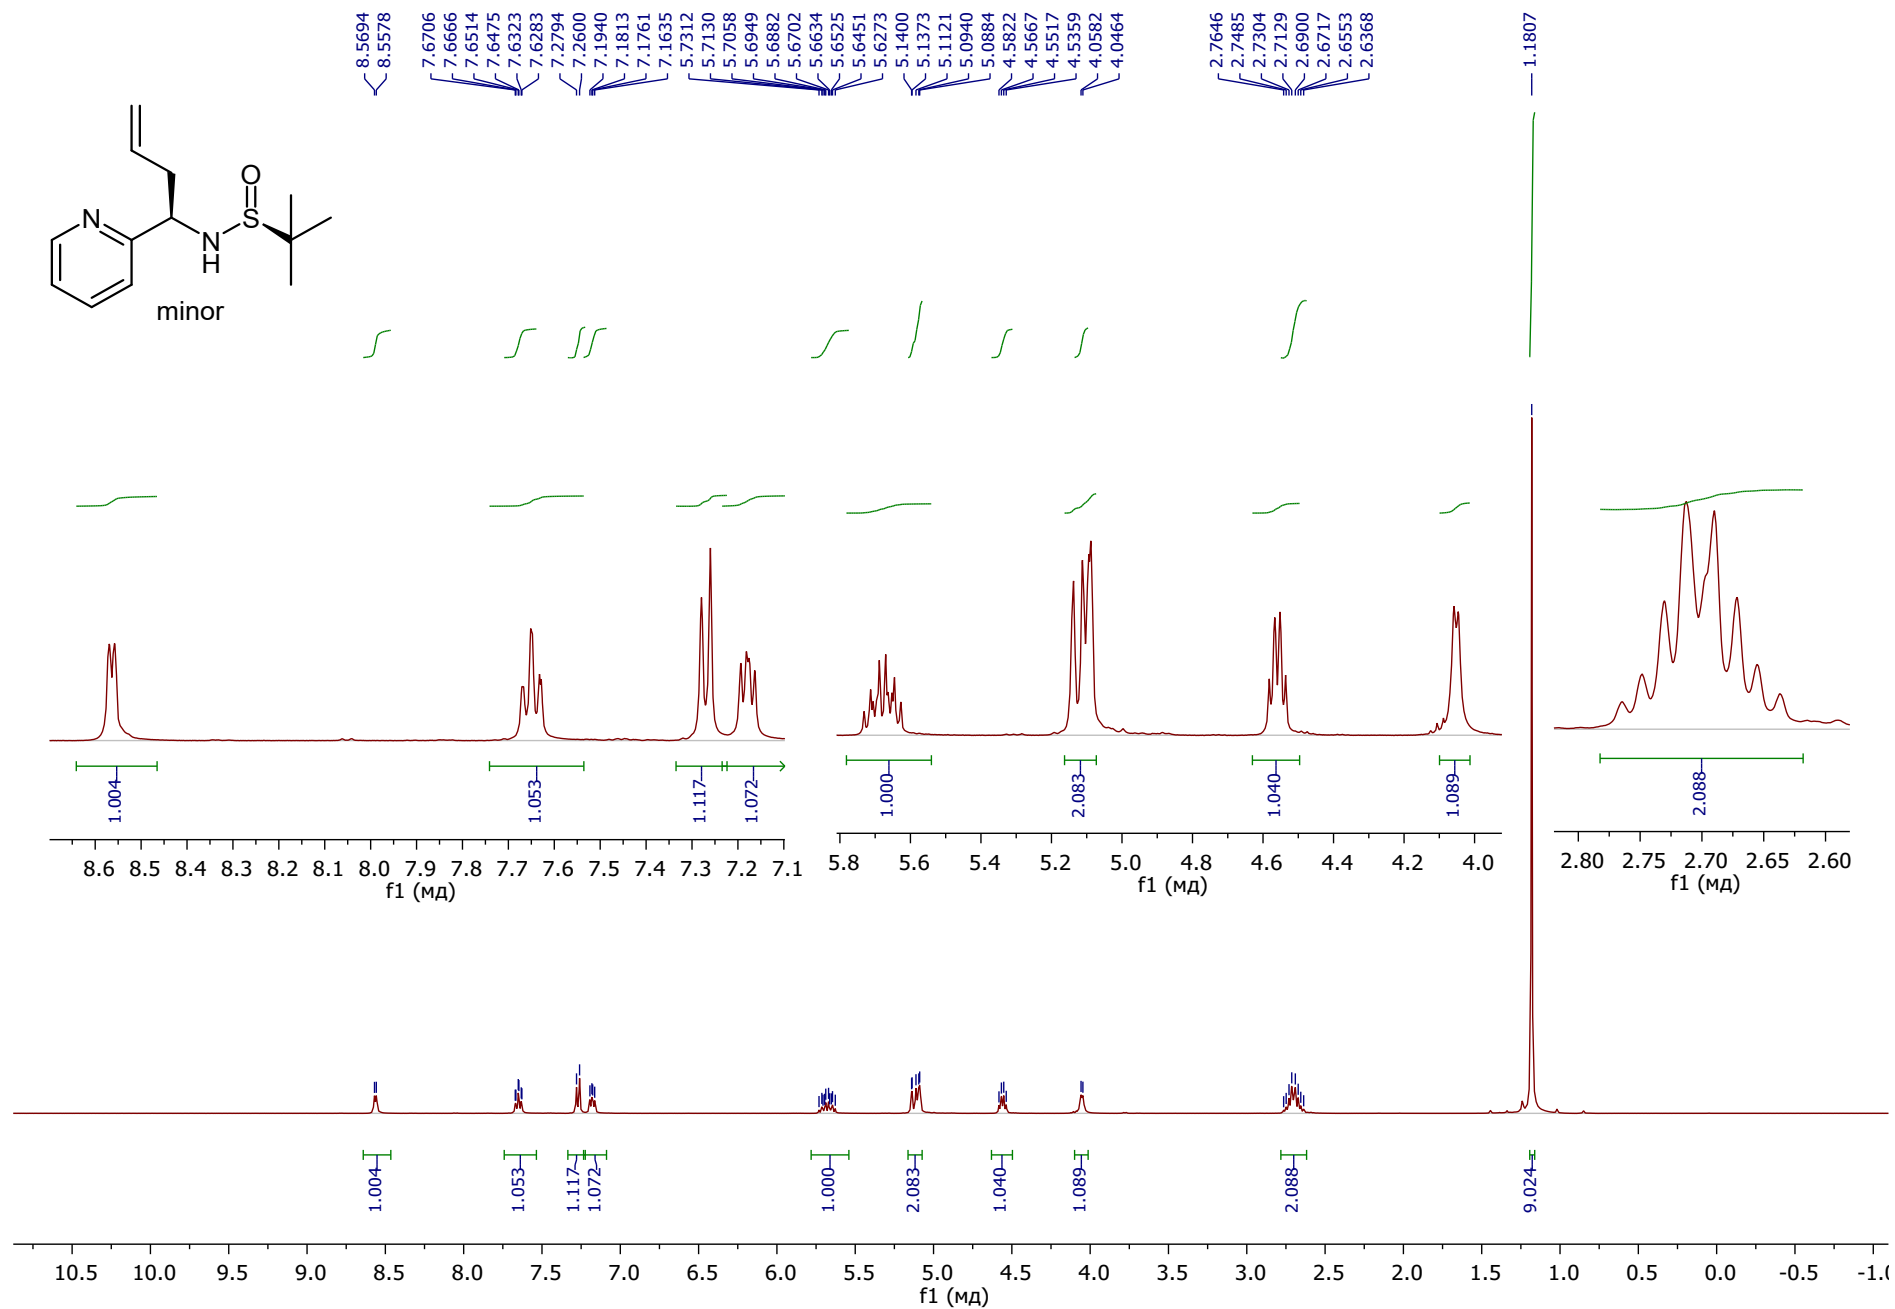

$^{13}\text{C}$  NMR ( $\text{CDCl}_3$ , 101 MHz) (*S,S*)-**3t**

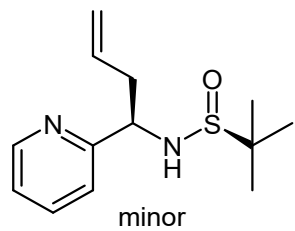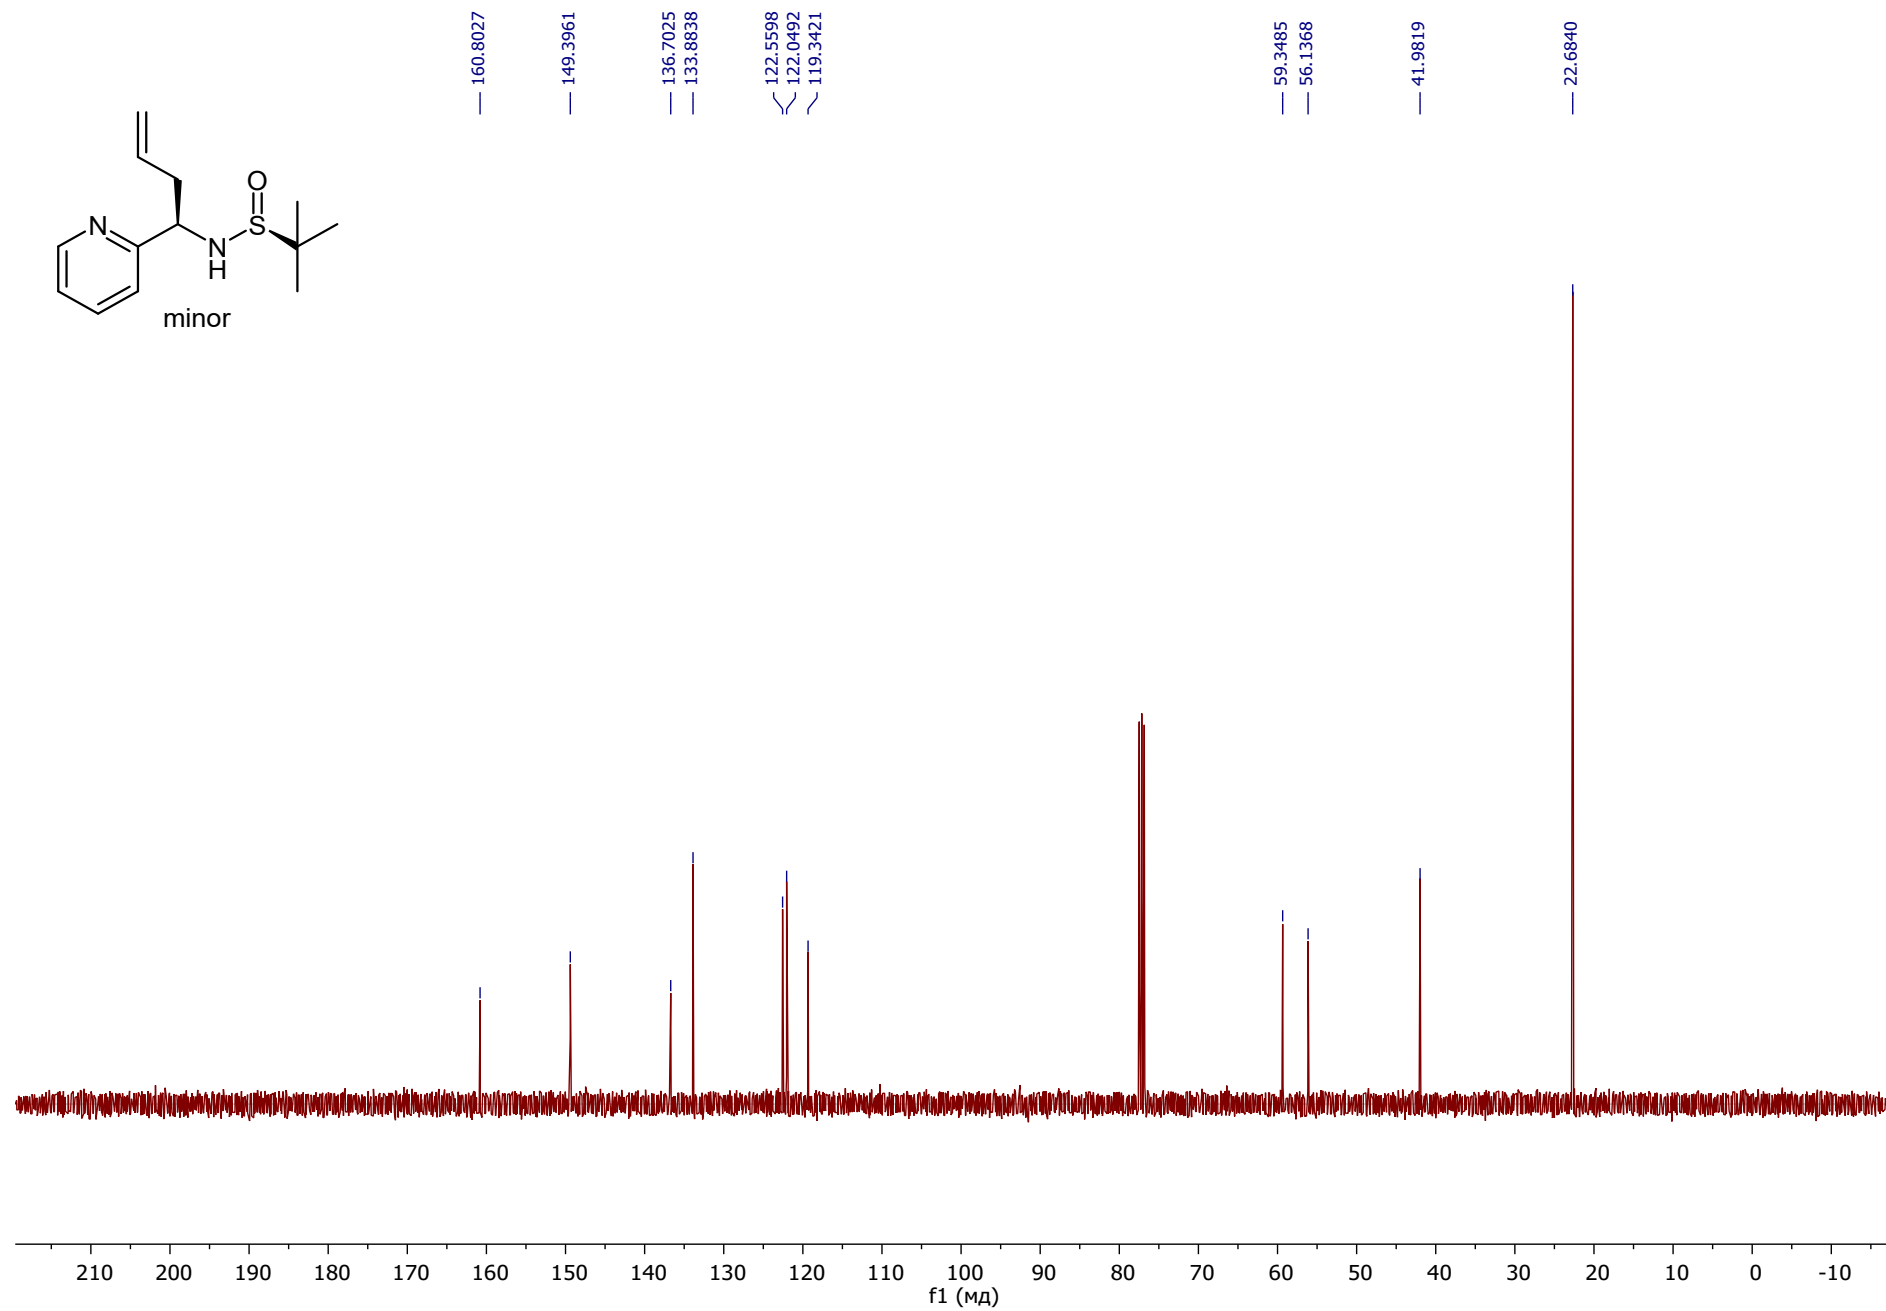

$^1\text{H}$  NMR ( $\text{CDCl}_3$ , 400 MHz) (*S,S*)-**3u**

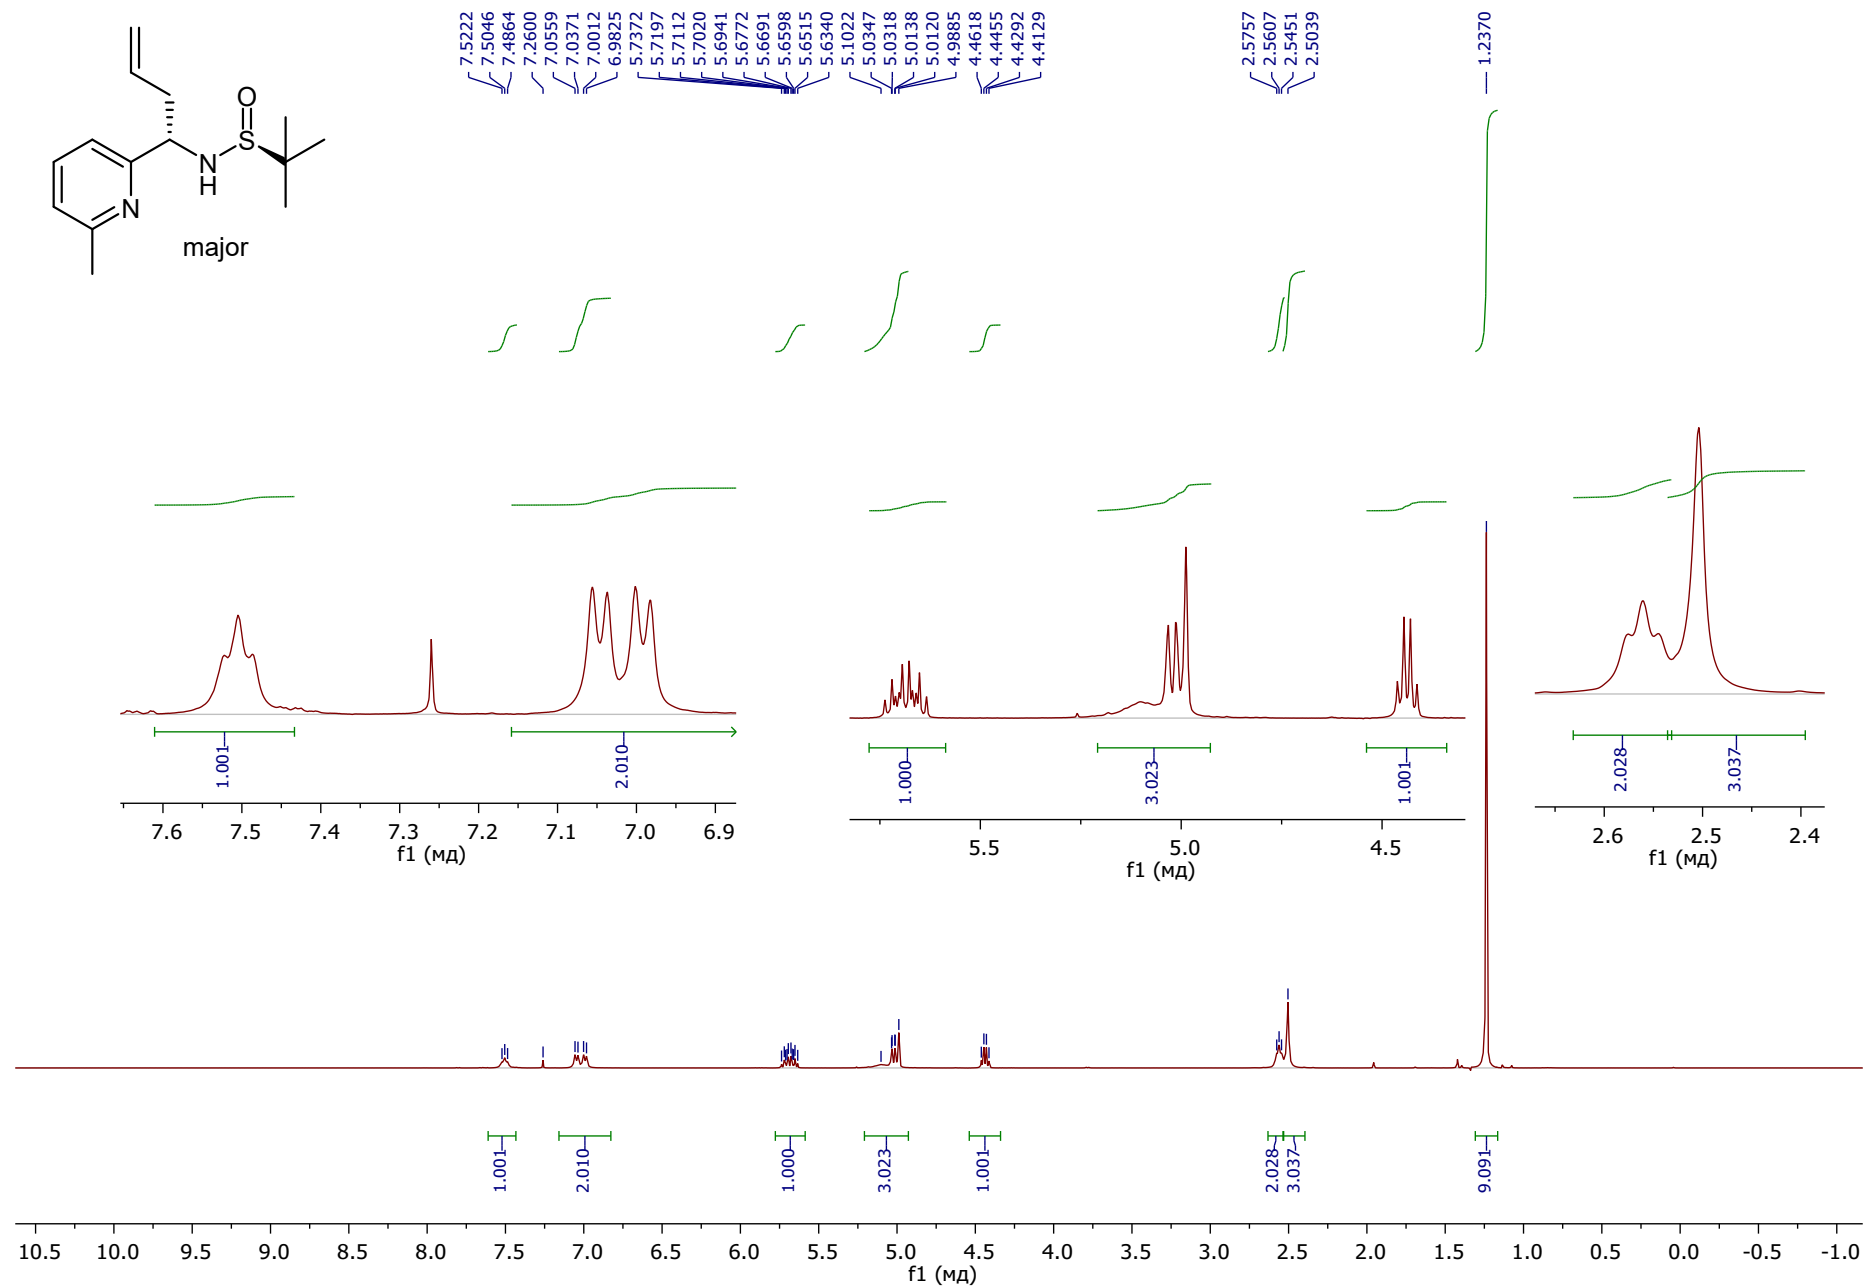

$^{13}\text{C}$  NMR ( $\text{CDCl}_3$ , 101 MHz) (*S,S*)-**3u**

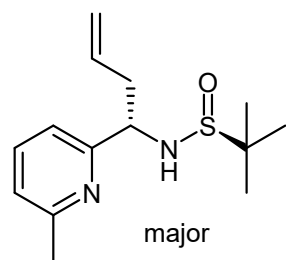

159.5641  
157.6302

136.9541  
134.3023

122.0212  
118.7573  
117.8995

59.6643  
56.1969

42.2319

24.4074  
22.8892

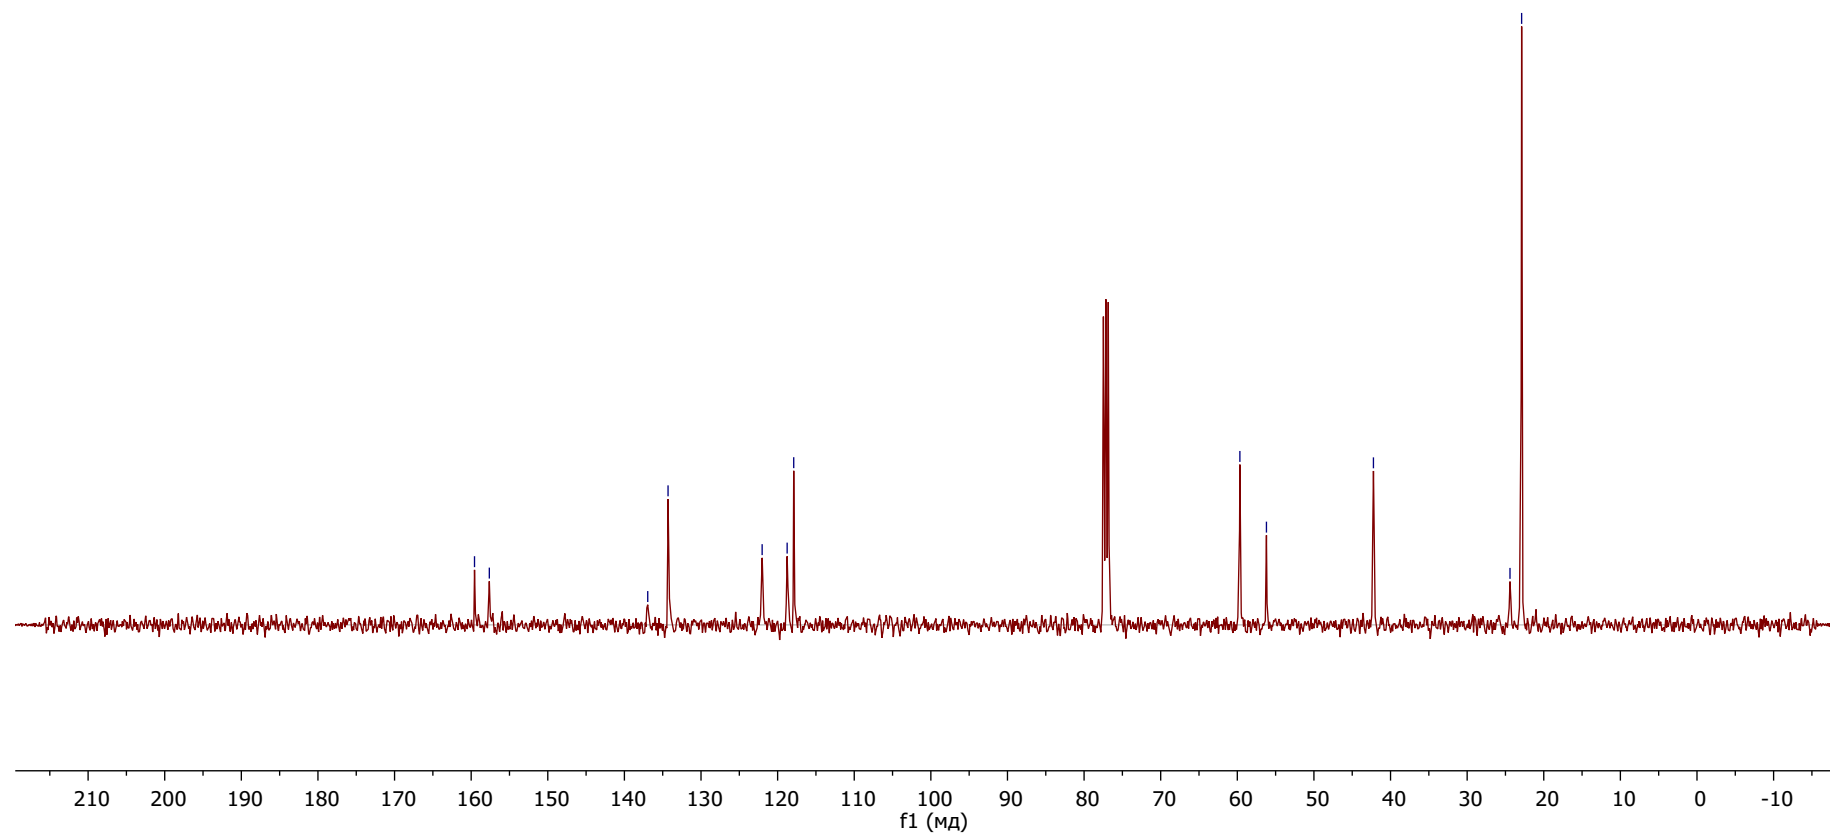



<sup>1</sup>H NMR (CDCl<sub>3</sub>, 400 MHz) (*S,S*,*R*)-3u

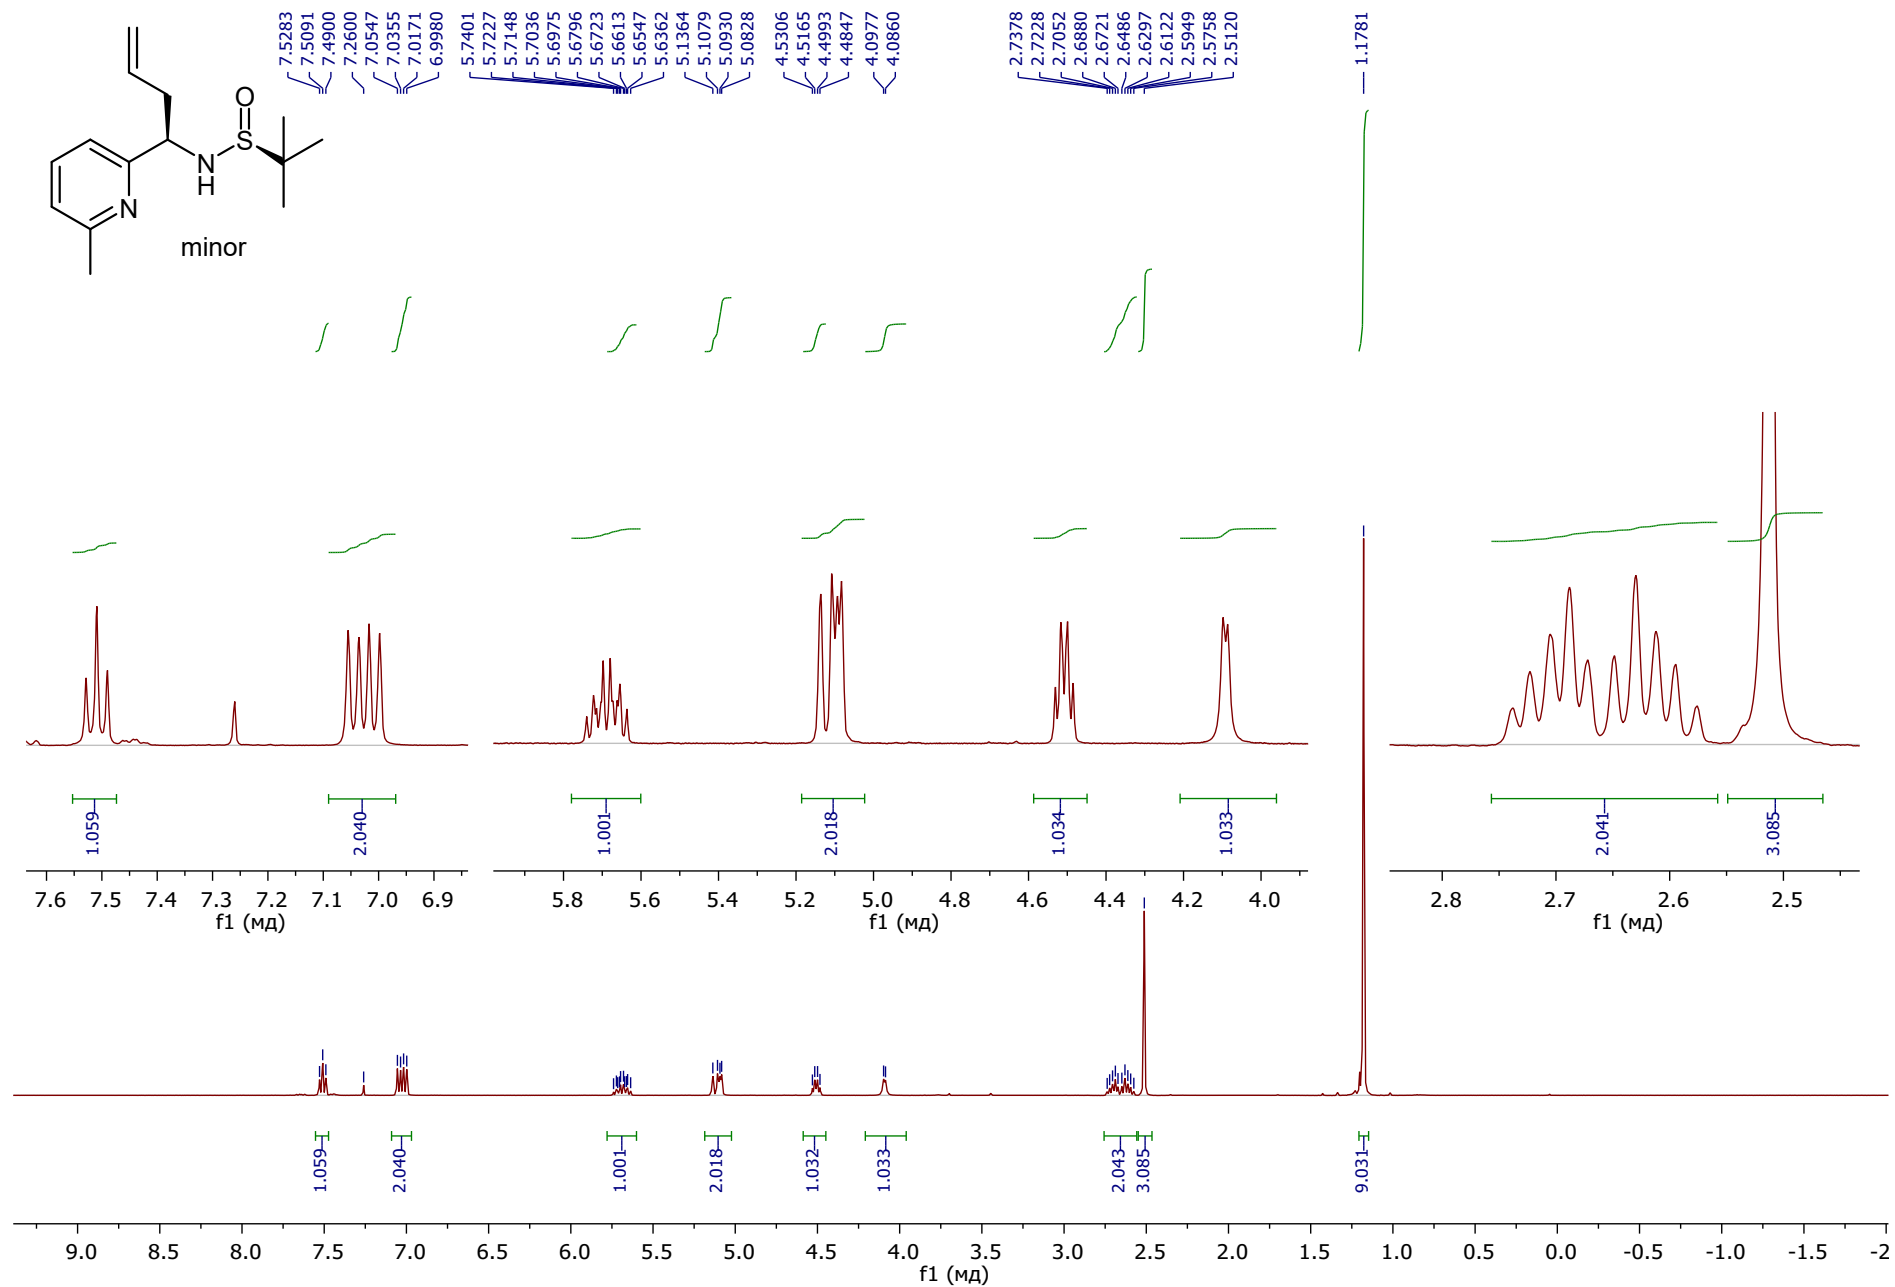

<sup>13</sup>C NMR (CDCl<sub>3</sub>, 101 MHz) (*S,R*)-**3u**

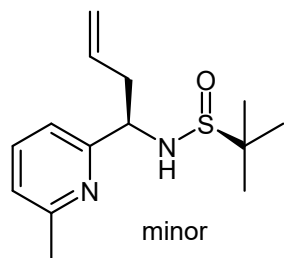

160.2069  
158.1596

136.6990  
134.1622

122.0211  
119.1330  
118.6763

59.3060  
56.1042

42.1714

24.5124  
22.6695

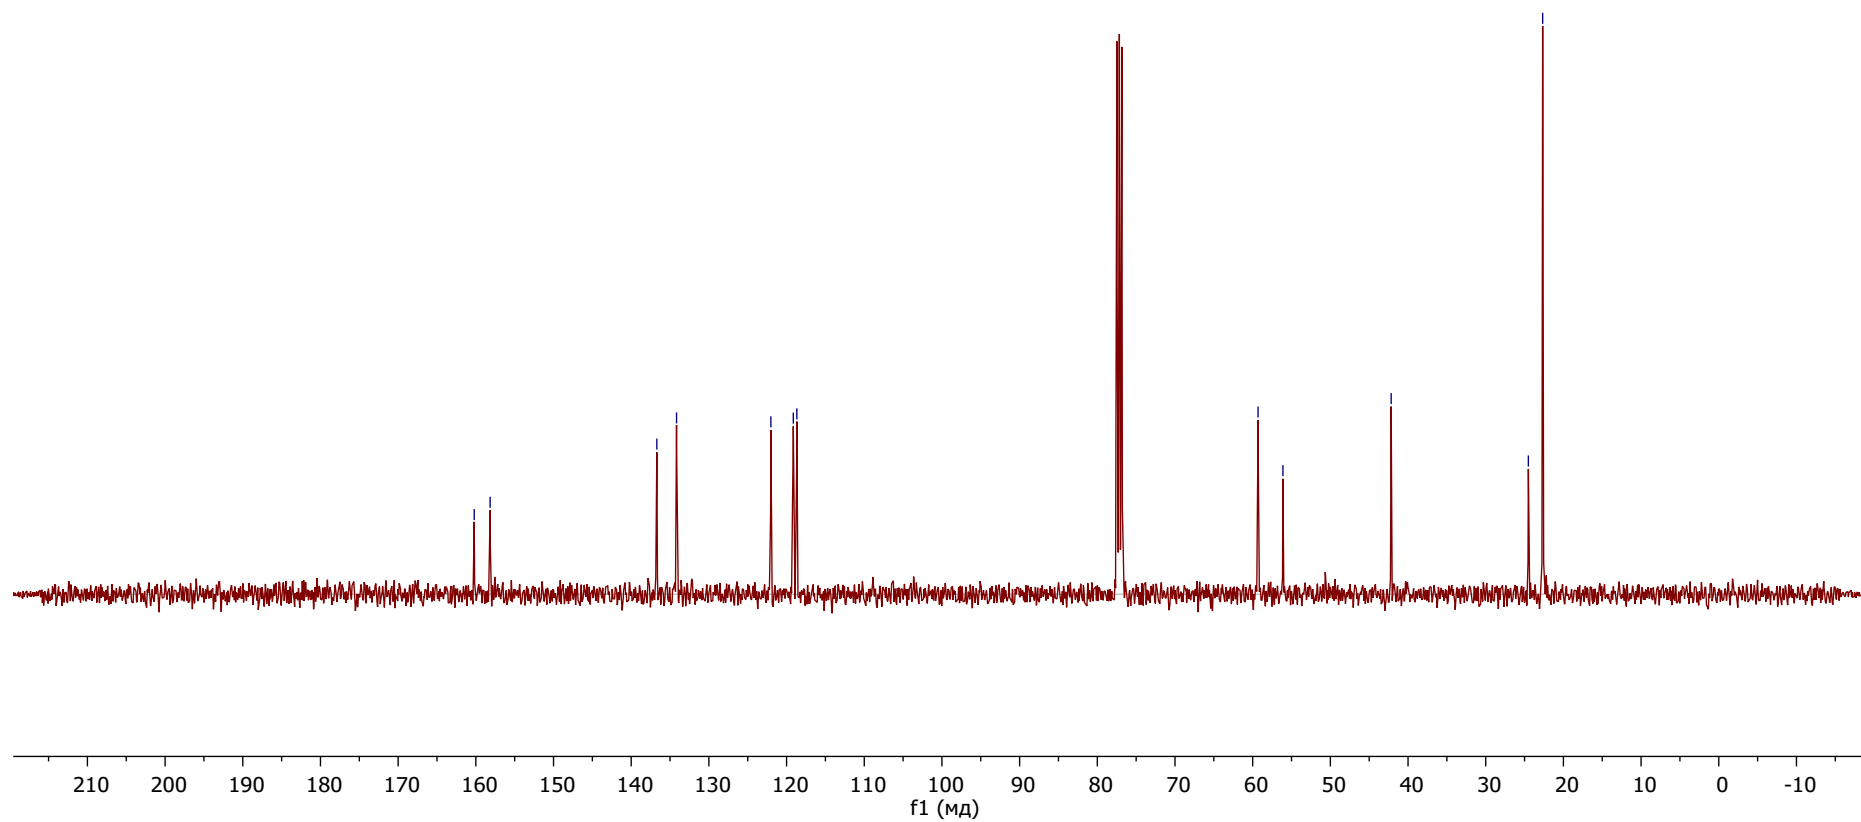

<sup>1</sup>H NMR (CDCl<sub>3</sub>, 400 MHz) **3v**

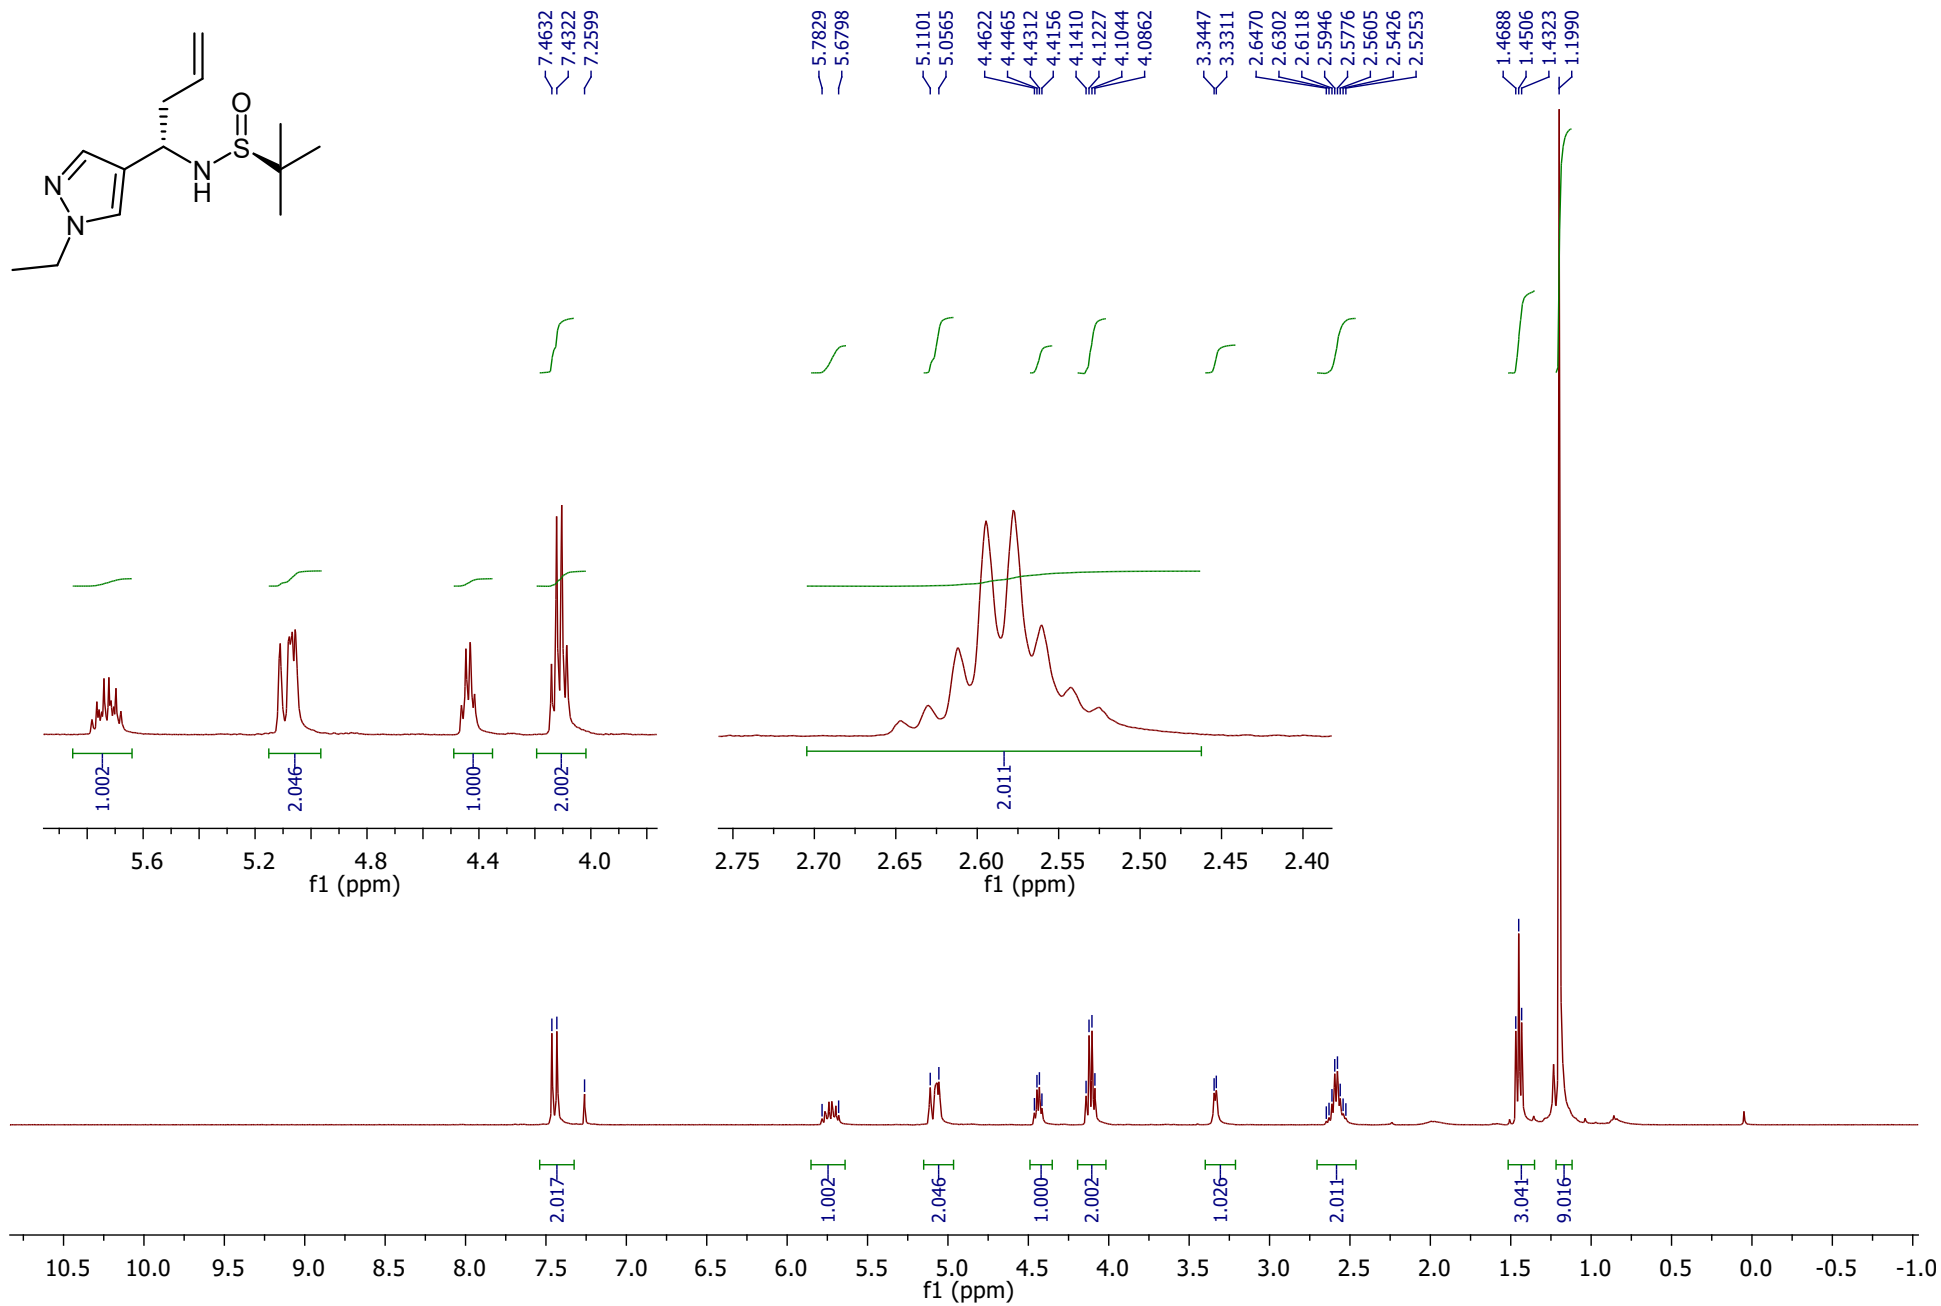

<sup>1</sup>H NMR (CDCl<sub>3</sub>, 400 MHz) **3w**

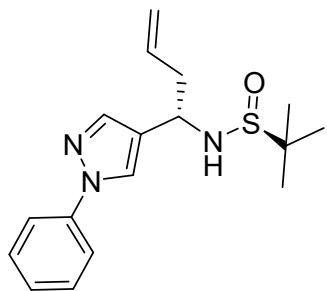

8.0360  
7.6808  
7.6630  
7.4495  
7.4309  
7.4121  
7.2908  
7.2722  
7.2600  
5.8371  
5.8195  
5.7951  
5.7773  
5.7528  
5.7354  
5.1694  
5.1314  
5.1112  
— 4.5475  
3.4264  
2.7320  
2.7158  
2.6978  
2.6801  
2.6627  
2.6451  
2.6274  
2.6113  
— 1.2368

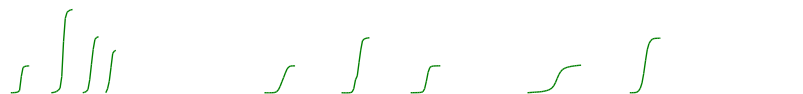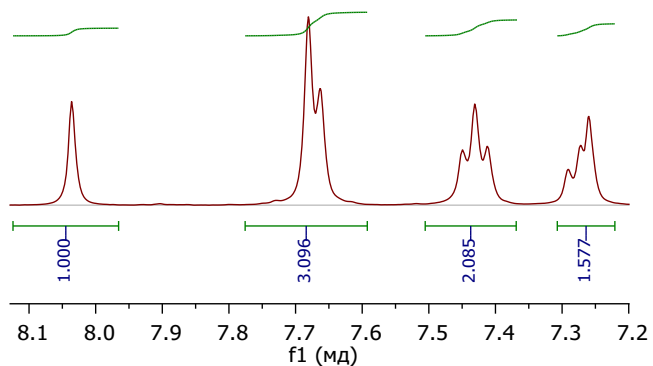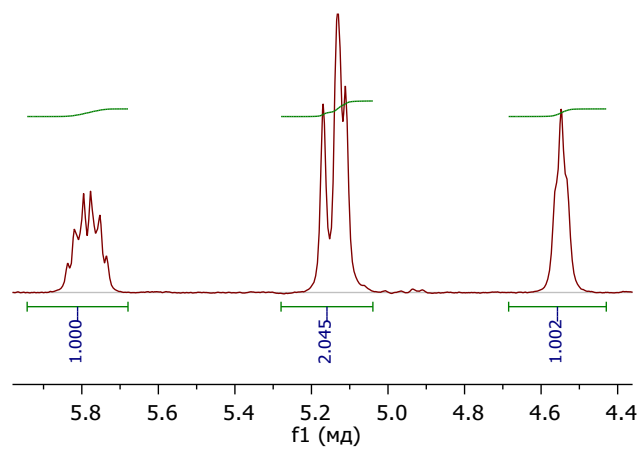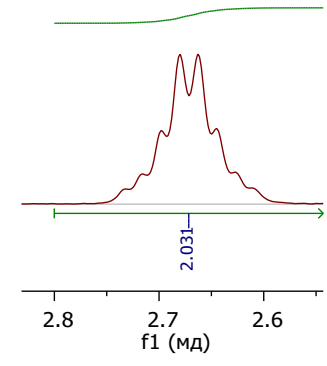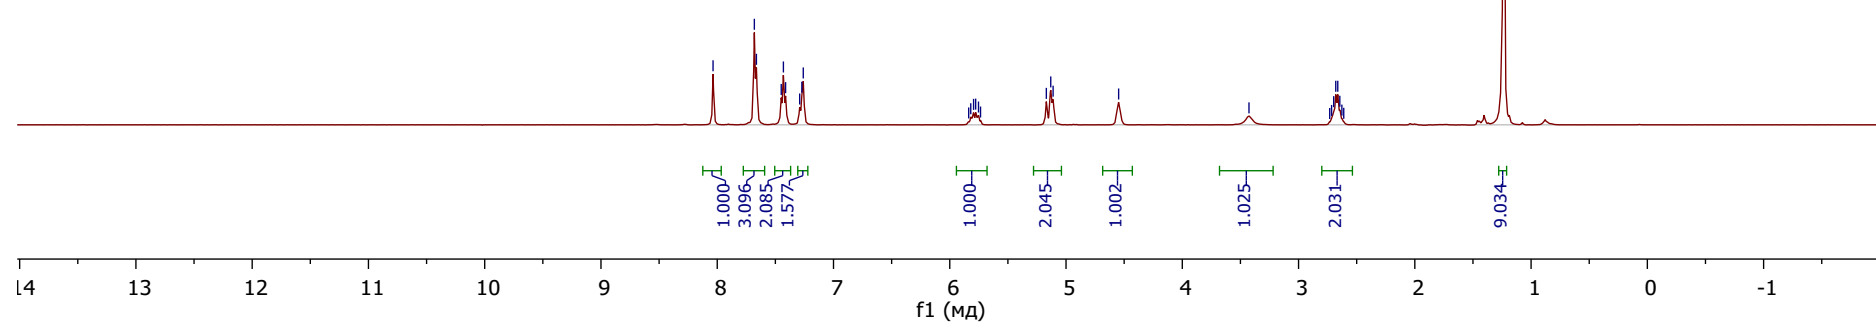

$^1\text{H}$  NMR ( $\text{CDCl}_3$ , 400 MHz) **6a**

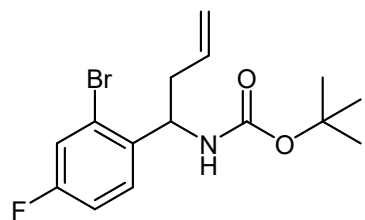

7.2937  
7.2874  
7.2732  
7.2669  
7.2598  
7.2441  
7.0283  
7.0223  
7.0076  
7.0022  
6.9870  
6.9811  
5.7293  
5.7117  
5.6867  
5.6691  
5.6444  
5.6267  
5.1643  
5.1458  
5.1211  
5.0246  
2.5222  
2.3940  
1.4027  
1.2680

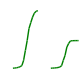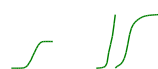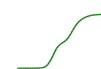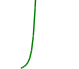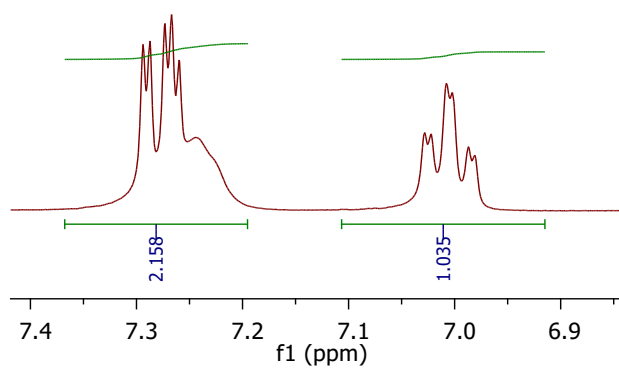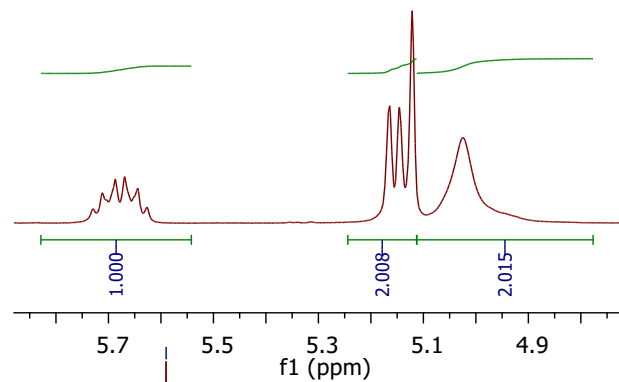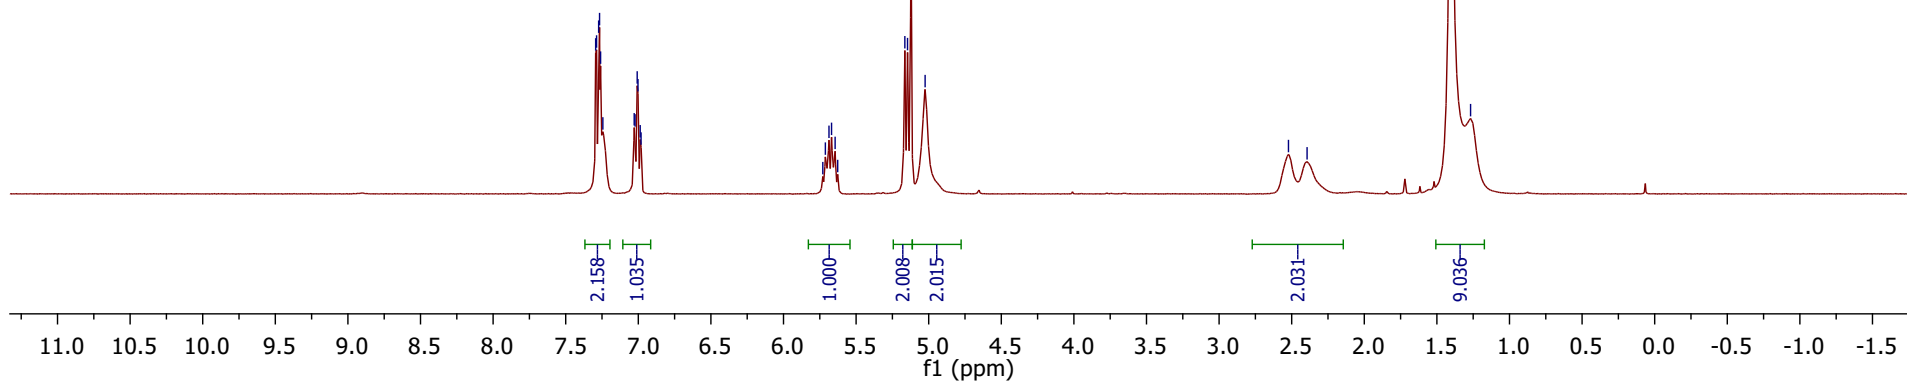

$^{13}\text{C}$  NMR (CDCl<sub>3</sub>, 101 MHz) **6a**

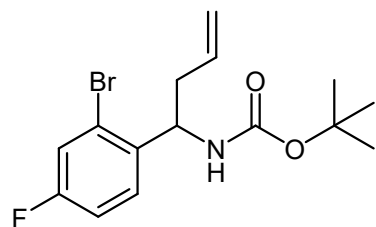

162.5673  
160.0955  
155.0425

137.5812  
137.5199  
133.4086  
128.1952  
128.1077  
122.6464  
122.5975  
120.5246  
120.2996  
119.0152  
114.8080  
114.5966

79.9547

53.0417

39.6254

28.4183

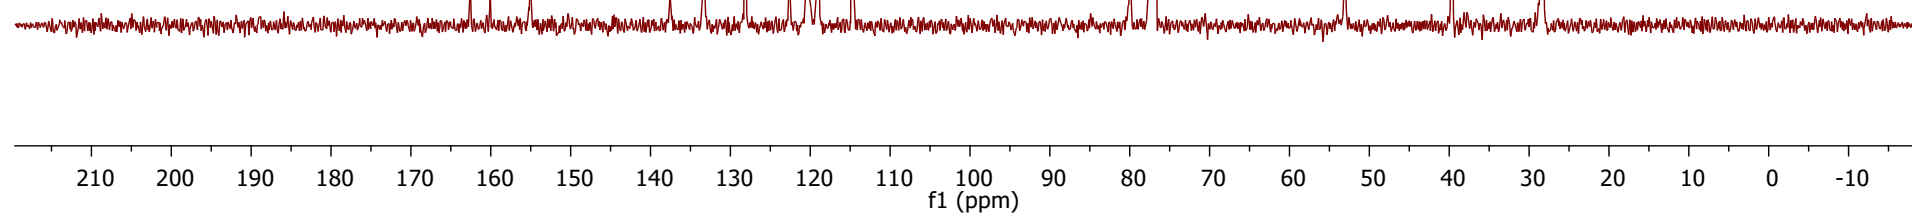

<sup>1</sup>H NMR (CDCl<sub>3</sub>, 400 MHz) **6b**

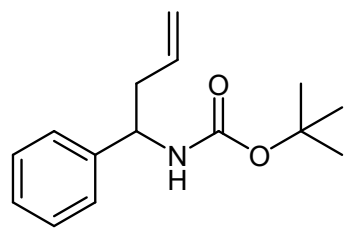

7.3449  
7.3261  
7.3079  
7.2676  
7.2596  
7.2476  
7.2416

5.7283  
5.6250

5.1304  
5.1270  
5.0878  
5.0632  
4.8644  
4.7344

2.5155

1.4085

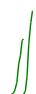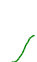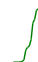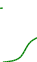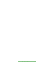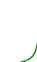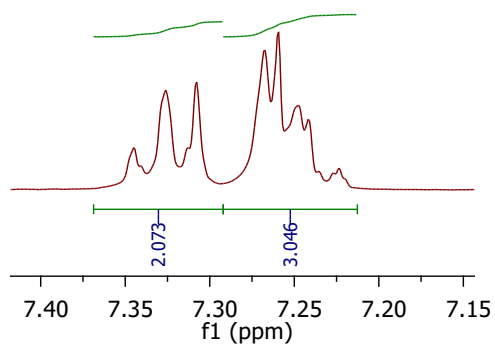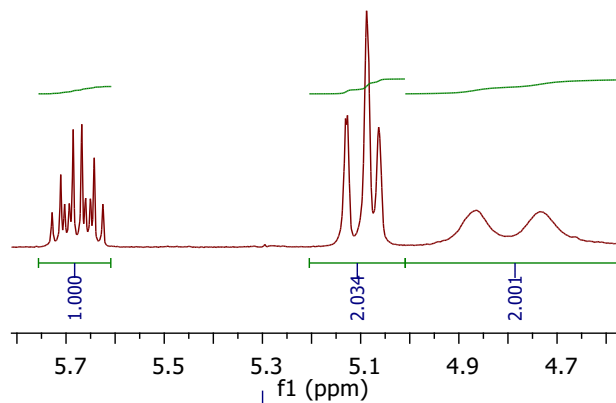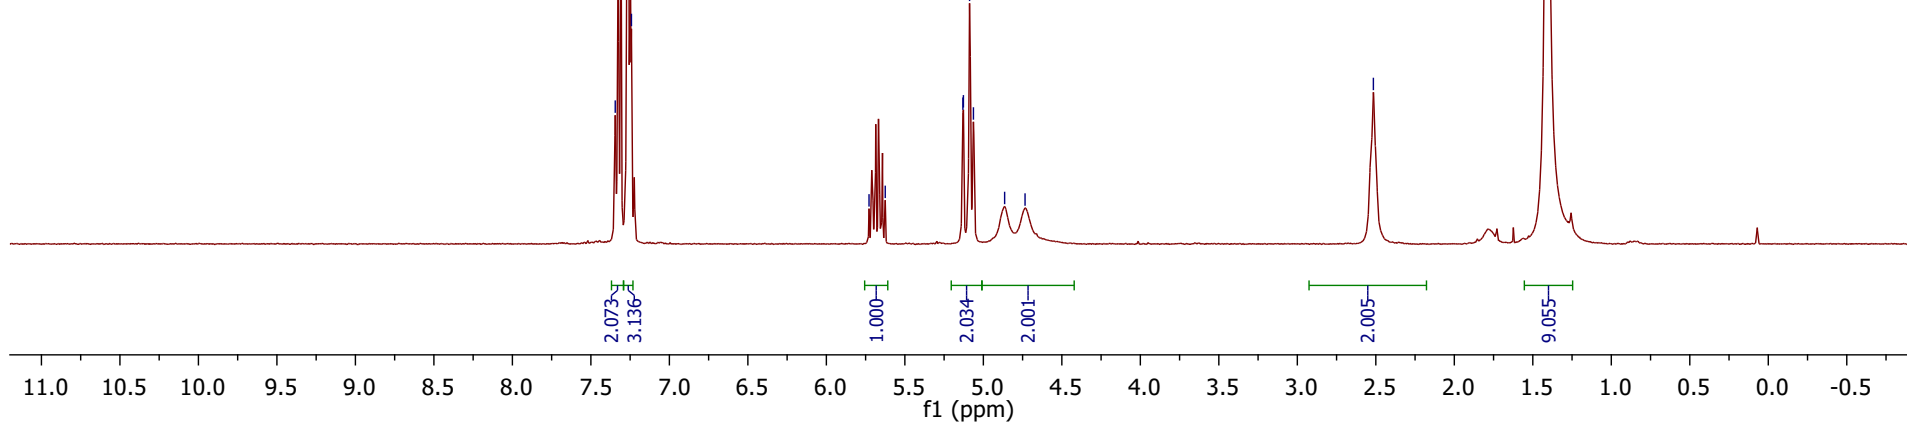

$^1\text{H}$  NMR ( $\text{CDCl}_3$ , 400 MHz) **6c**

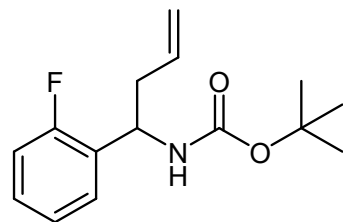

7.2600  
7.2419  
7.1899  
7.1020  
7.0833  
7.0649  
7.0394  
7.0183  
7.0129  
6.9921  
5.7156  
5.6979  
5.6908  
5.6730  
5.6553  
5.6373  
5.6303  
5.6126  
5.1051  
5.0653  
5.0431  
4.9575  
4.9440

*br*

*s* *br*

*s*

*s*

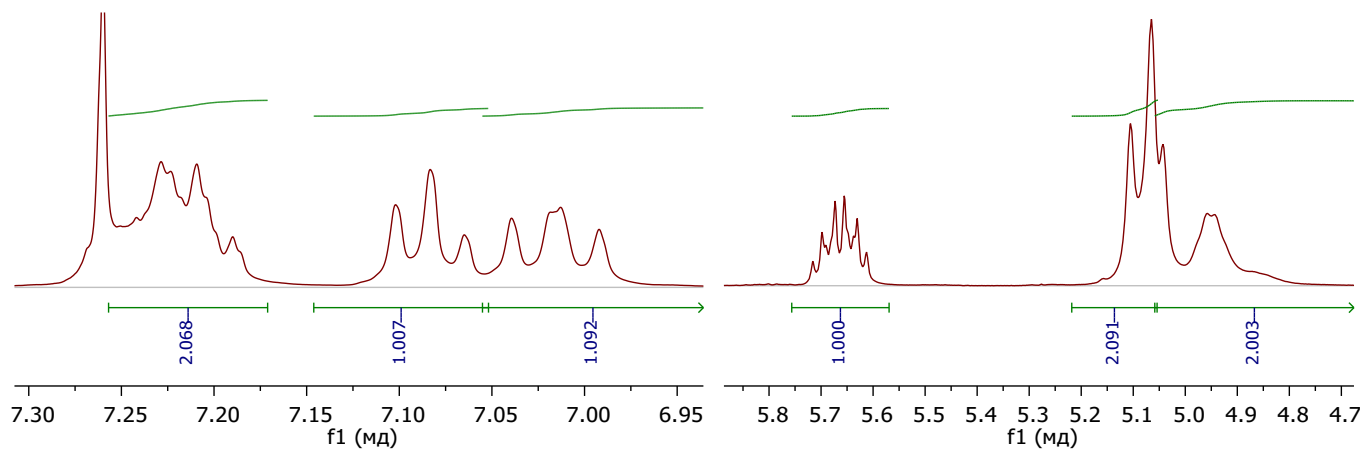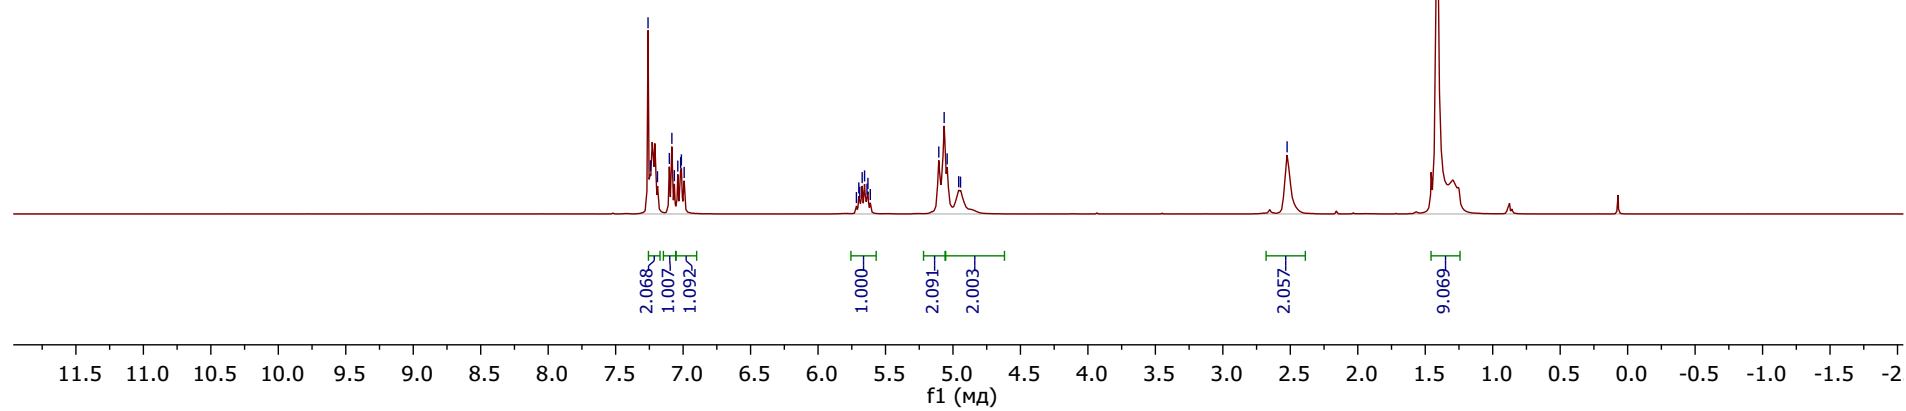



<sup>1</sup>H NMR (CDCl<sub>3</sub>, 400 MHz) **6d**

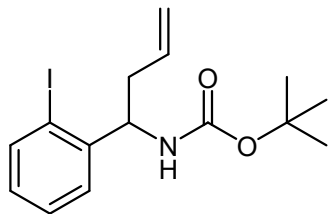

7.8248  
7.8052  
7.3319  
7.3129  
7.2947  
7.2600  
7.2335  
6.9516  
6.9327  
6.9138  
5.7742  
5.7556  
5.7319  
5.7135  
5.6898  
5.6719  
5.1834  
5.1449  
5.1249  
5.0511  
5.0369  
4.9342  
4.8130

2.5267  
2.3626

1.4110  
1.2545

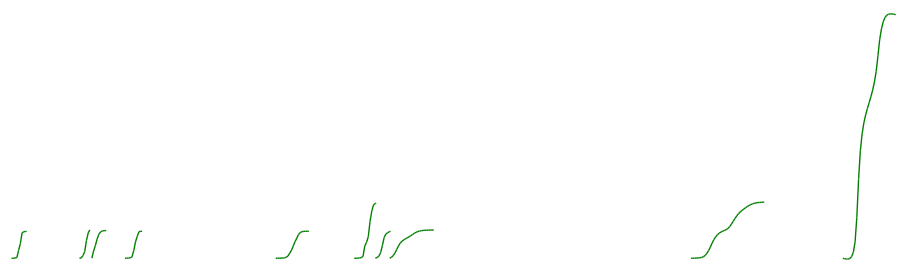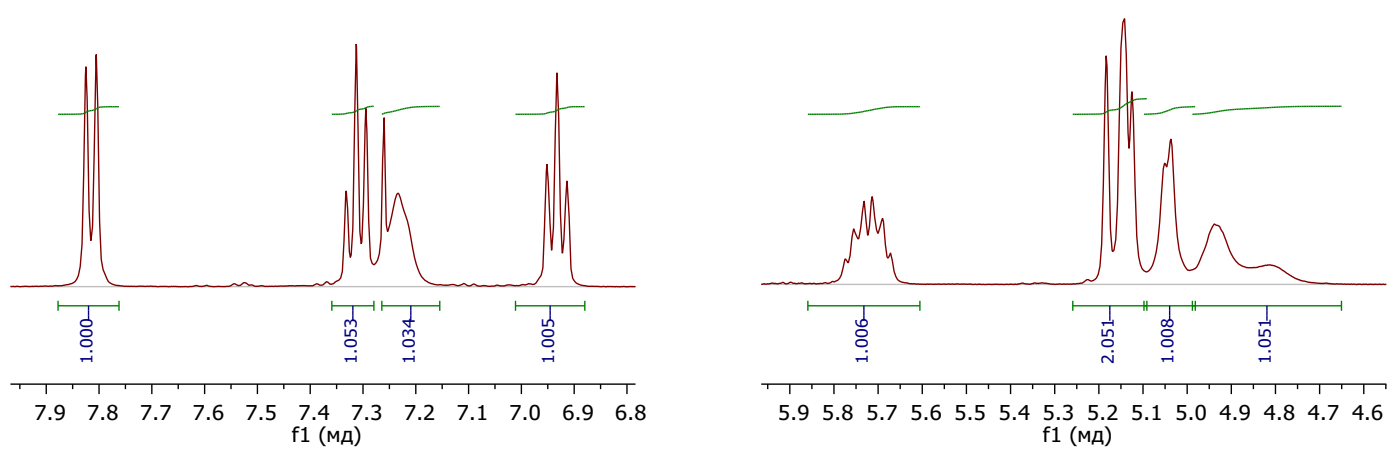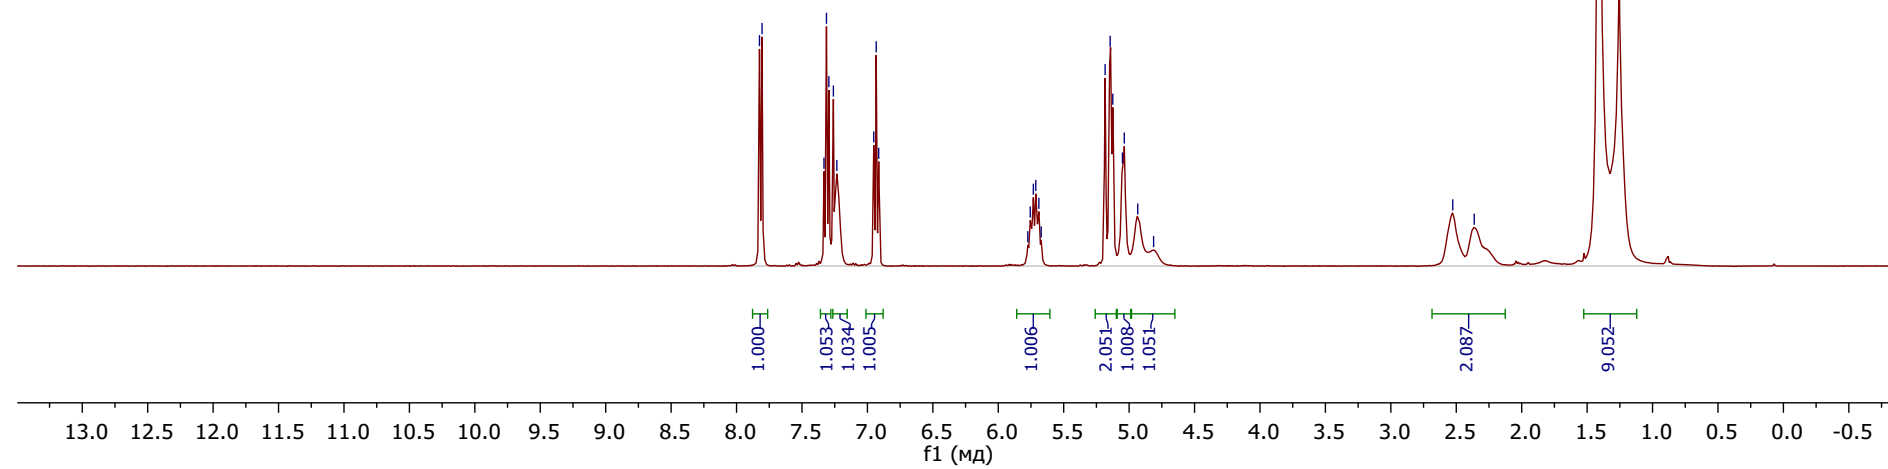

$^{13}\text{C}$  NMR ( $\text{CDCl}_3$ , 101 MHz) **6d**

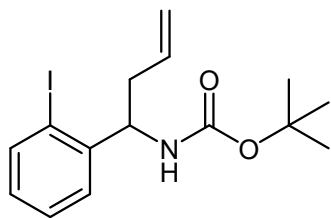

- 155.0348
- 145.4098
- 144.4688
- 140.0025
- 139.6723
- 133.6281
- 128.8790
- 128.4178
- 126.6172
- 118.8136
- 98.5932
- 79.7808
- 59.2061
- 57.7547
- 39.8800
- 28.4230

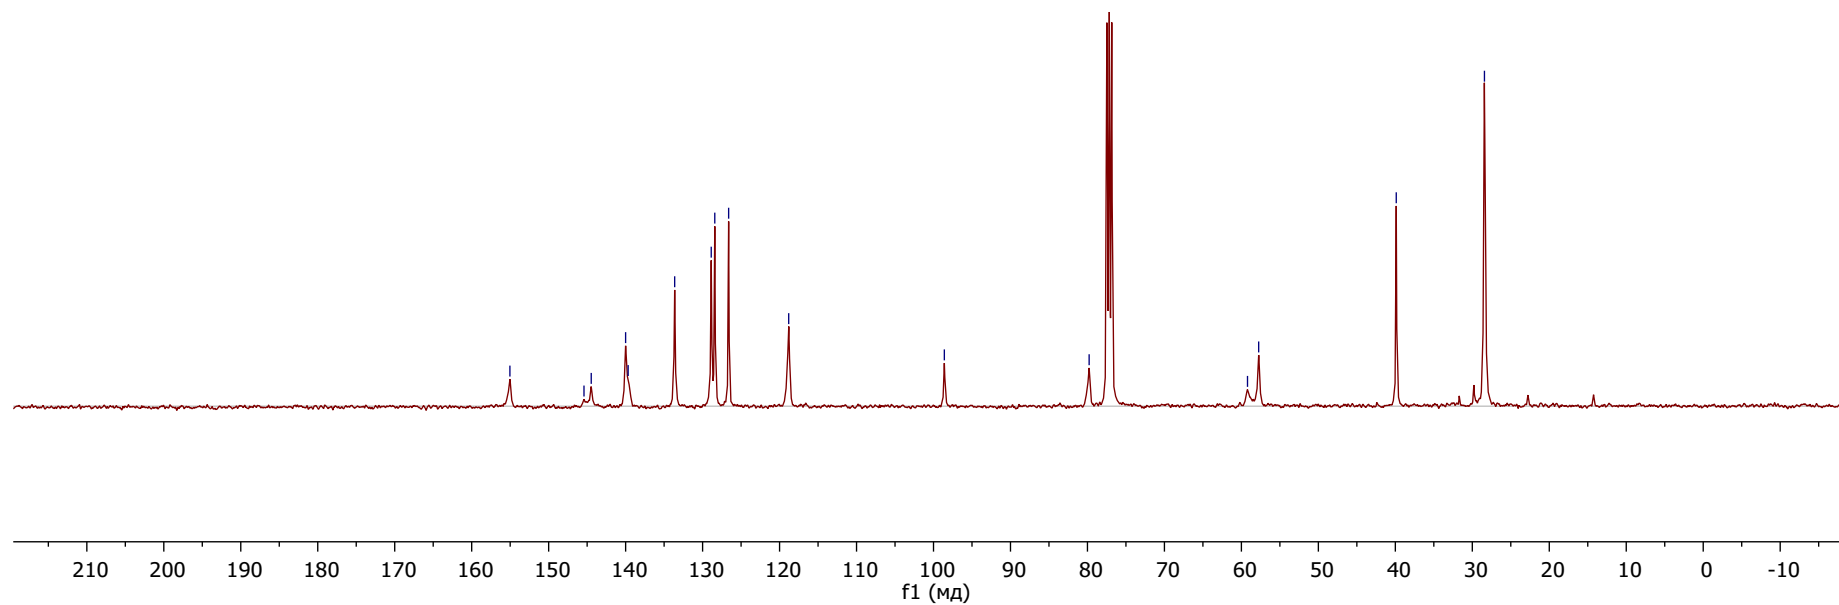

<sup>1</sup>H NMR (CDCl<sub>3</sub>, 400 MHz) **6e**

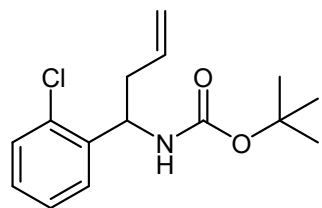

7.3787  
7.3533  
7.2946  
7.2845  
7.2600  
7.2264  
7.2002  
7.1762  
5.7896  
5.7658  
5.7340  
5.7097  
5.6780  
5.6541  
5.1903  
5.1554  
5.1291

2.5794  
2.5065

1.4460  
1.2864

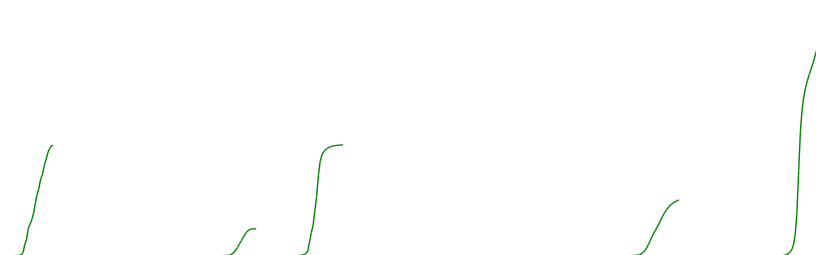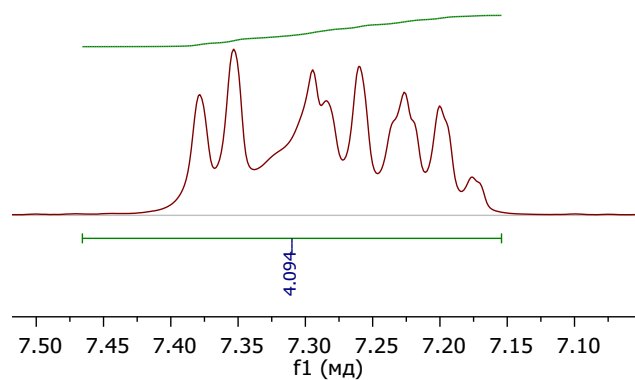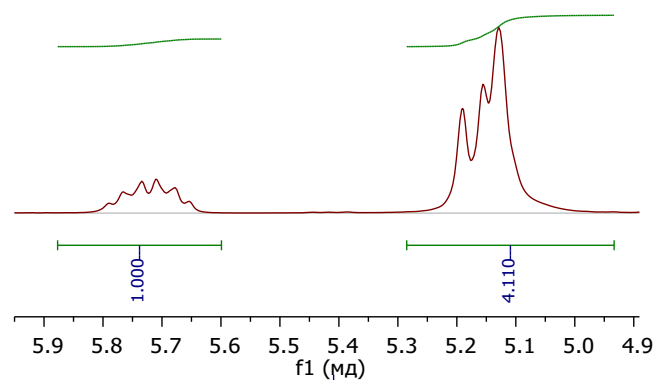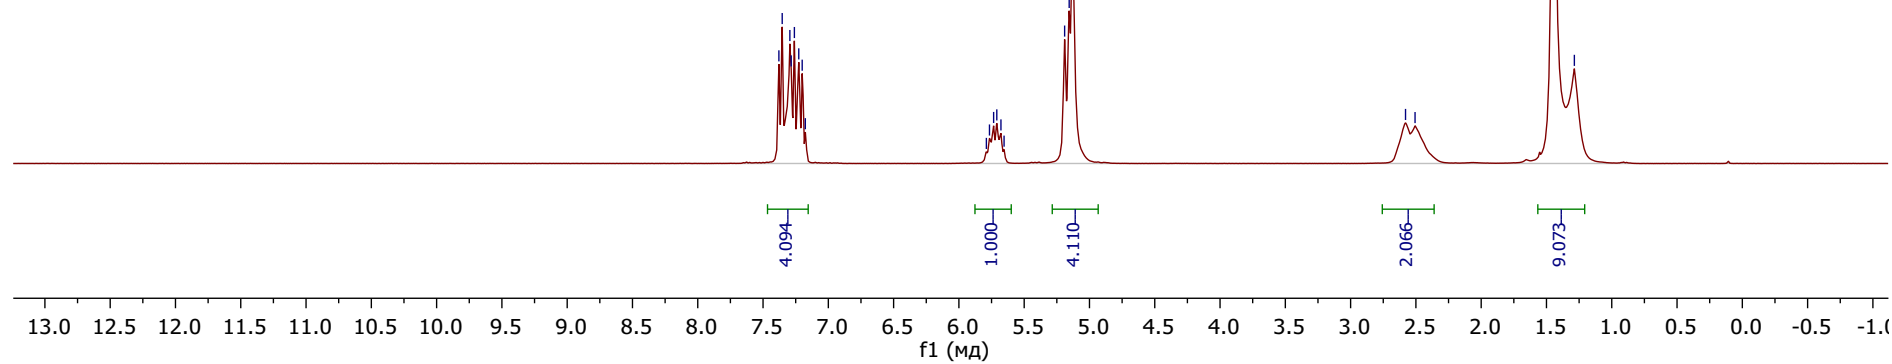

<sup>1</sup>H NMR (CDCl<sub>3</sub>, 400 MHz) **6f**

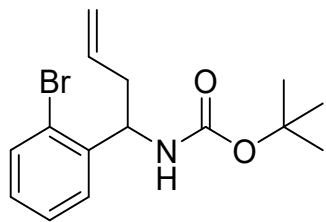

7.5502  
7.5319  
7.2777  
7.1095

5.7665  
5.6698

5.1800  
5.1387  
5.1261  
5.0533

2.5702  
2.4372

1.4237  
1.2655

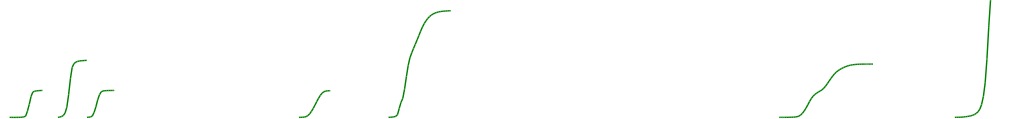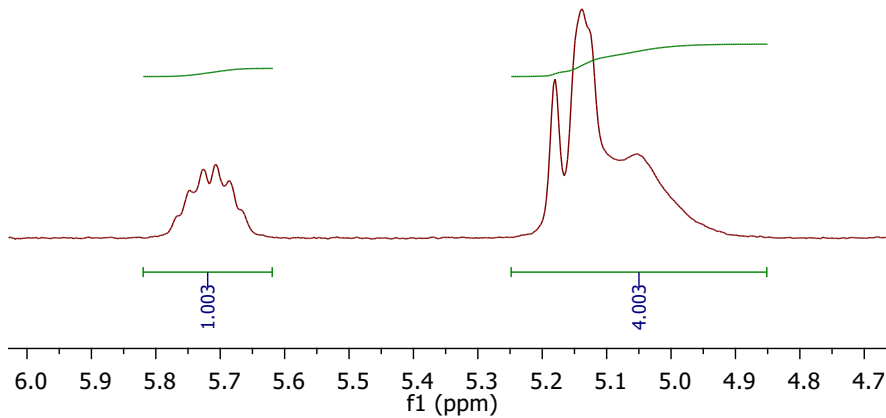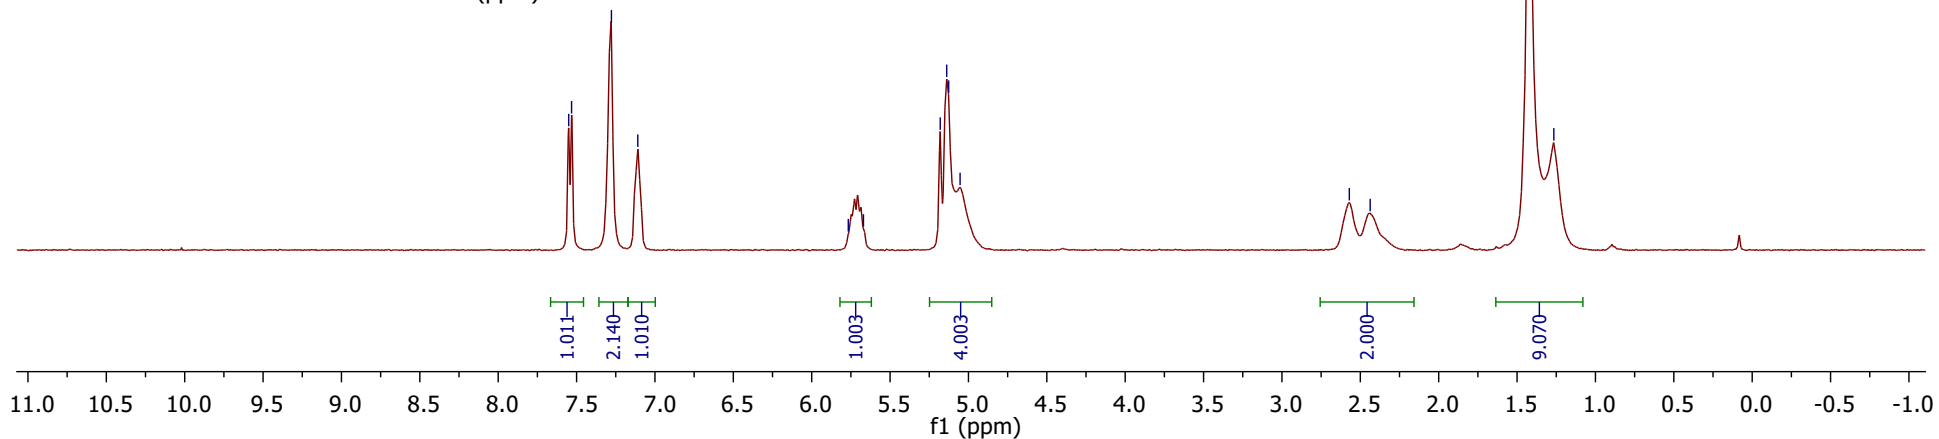

<sup>1</sup>H NMR (CDCl<sub>3</sub>, 400 MHz) **6g**

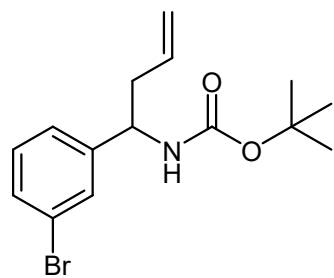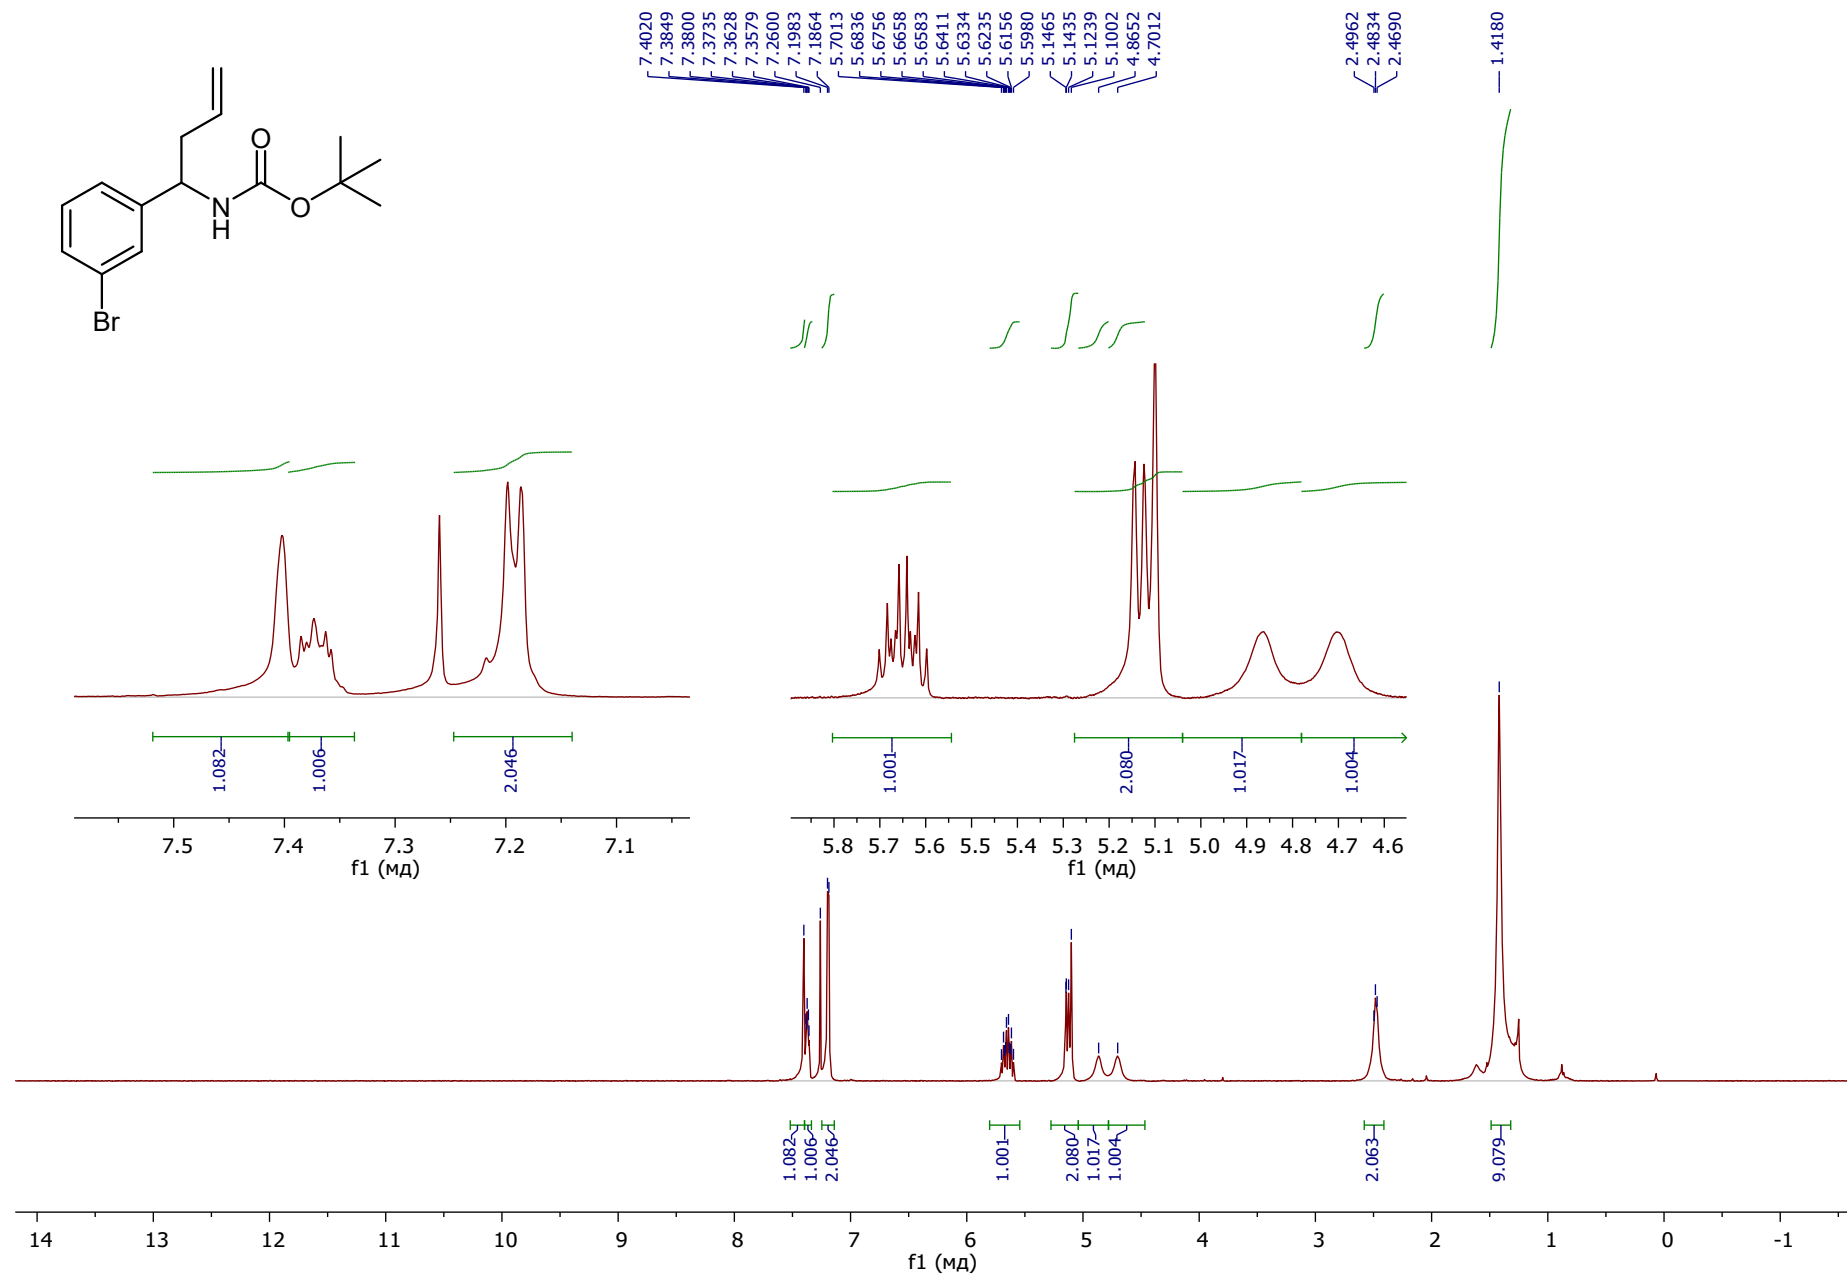

<sup>1</sup>H NMR (CDCl<sub>3</sub>, 400 MHz) **6h**

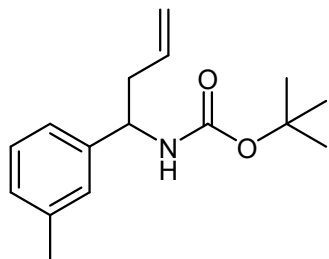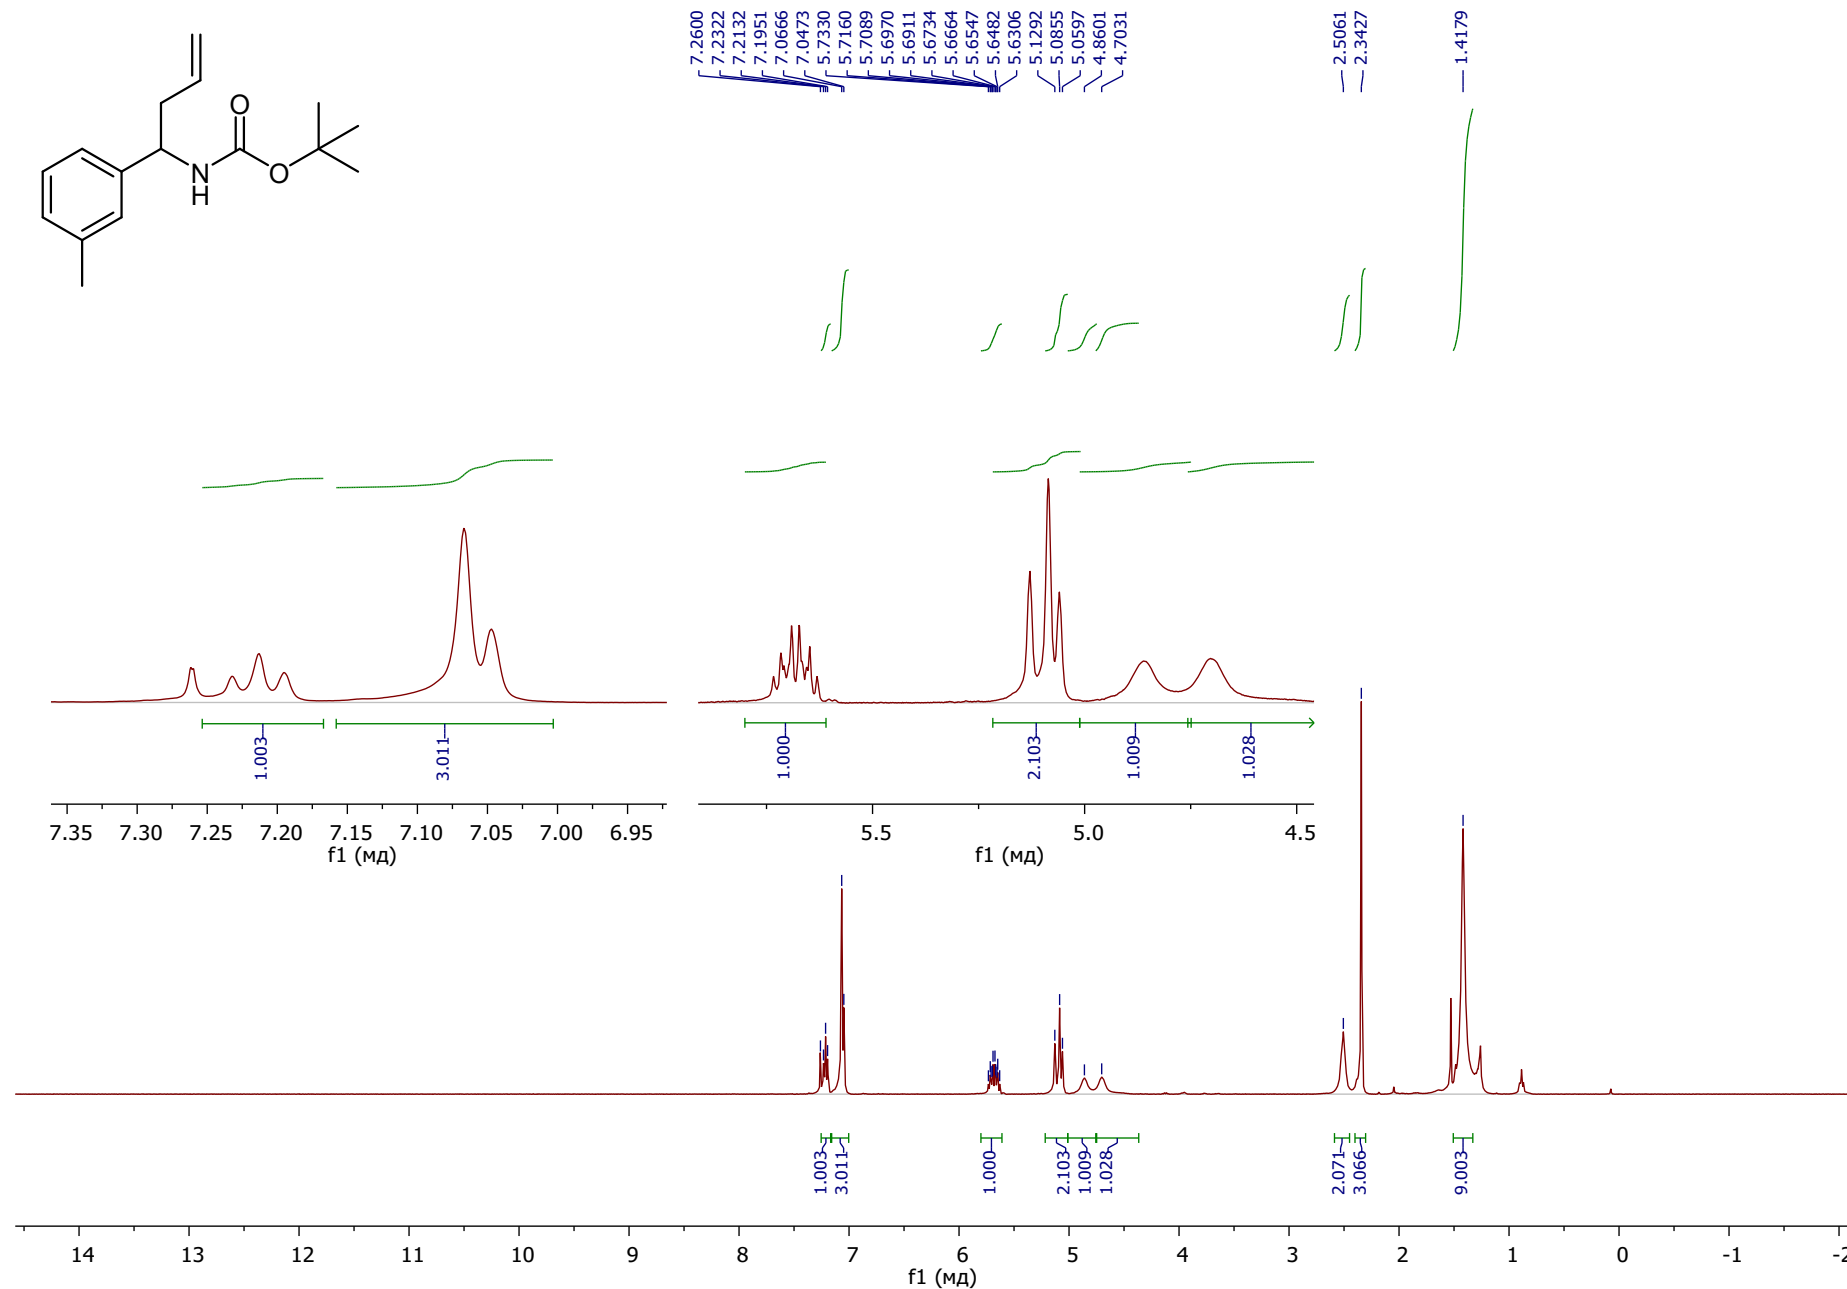

<sup>13</sup>C NMR (CDCl<sub>3</sub>, 101 MHz) **6h**

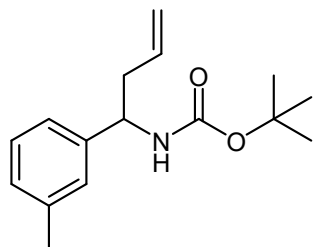

— 155.3375

— 142.4830

— 138.2116

— 134.2674

— 128.5204

— 128.0289

— 127.1799

— 123.3281

— 118.1791

— 79.5534

— 54.1724

— 41.4283

— 28.4906

— 21.6202

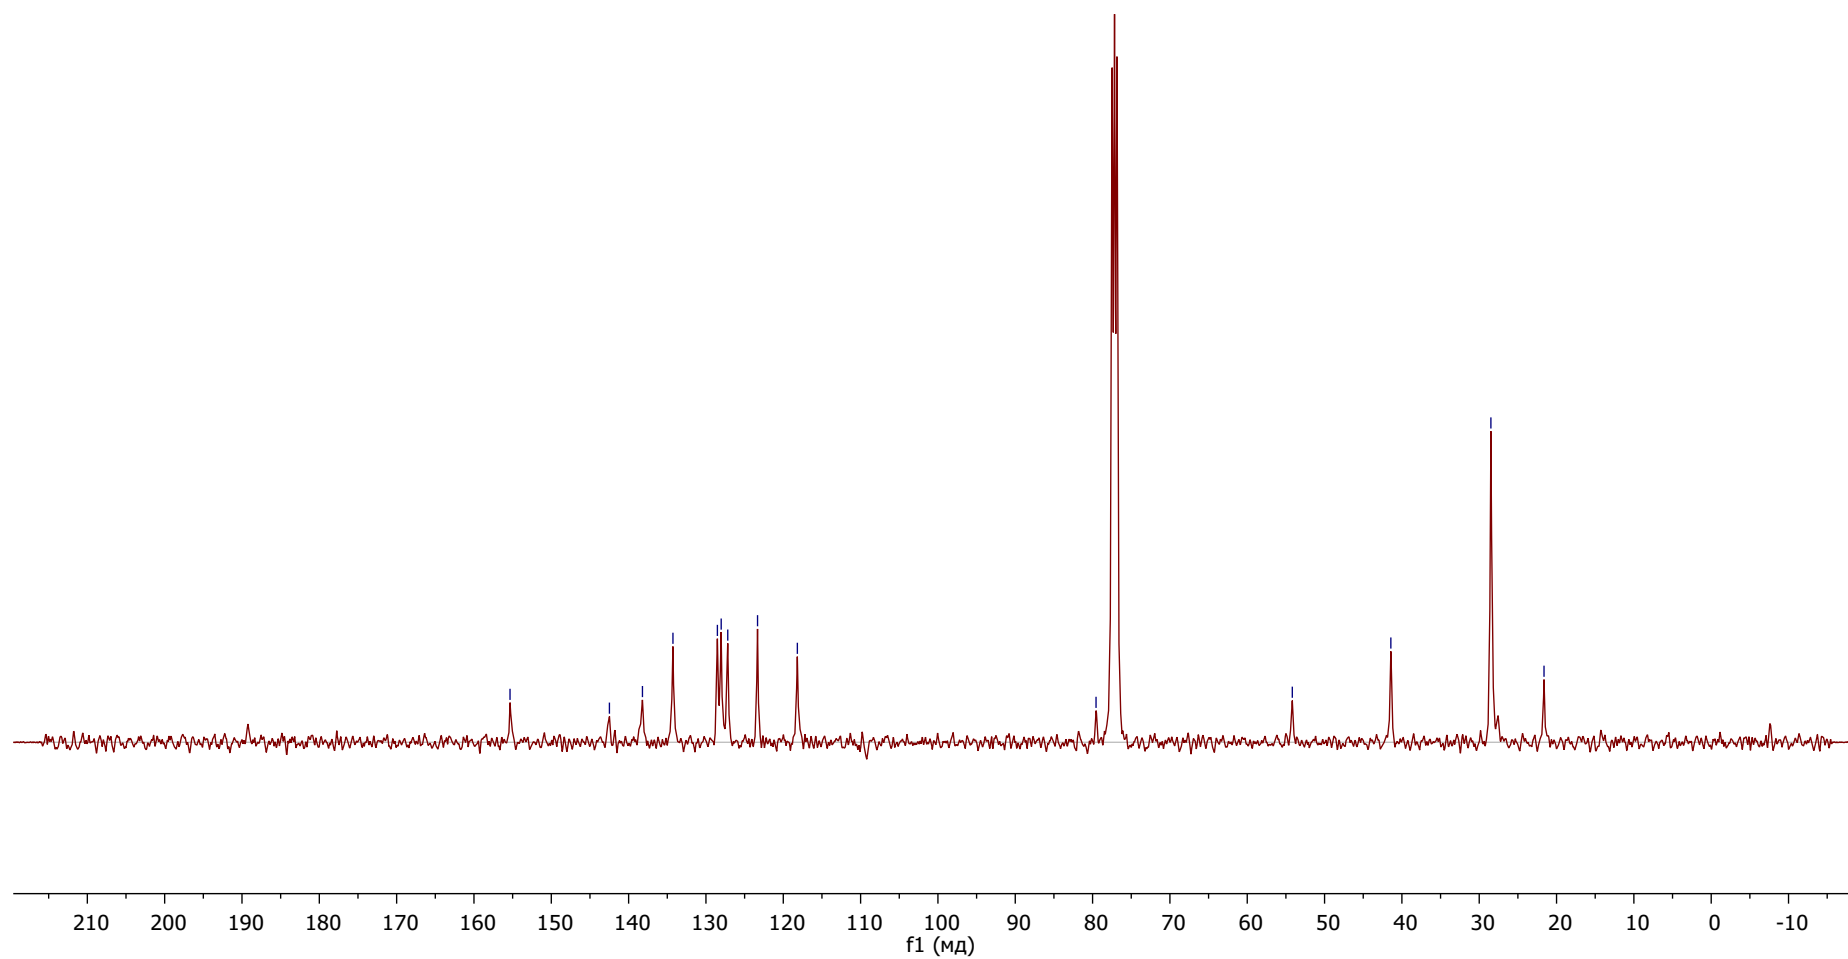

<sup>1</sup>H NMR (CDCl<sub>3</sub>, 400 MHz) **6i**

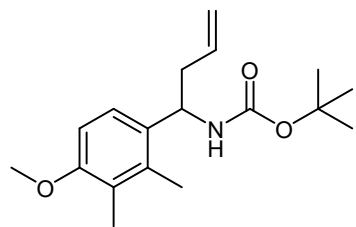

7.2595  
7.0481  
7.0267  
6.7139  
6.6926

5.7590  
5.6561  
5.1398  
5.0969  
5.0761  
5.0506  
4.9791  
4.9654  
4.7908  
4.7765

3.7970

2.4856  
2.4686  
2.2628  
2.1619

1.4125

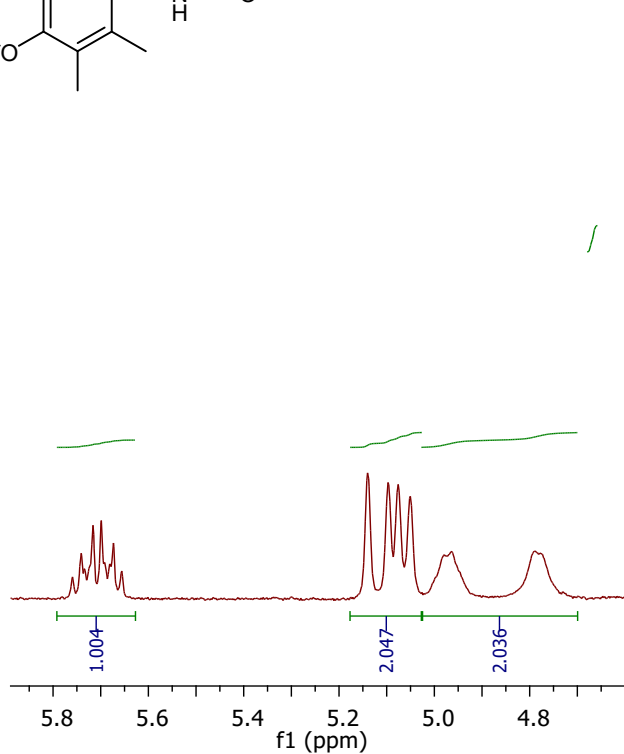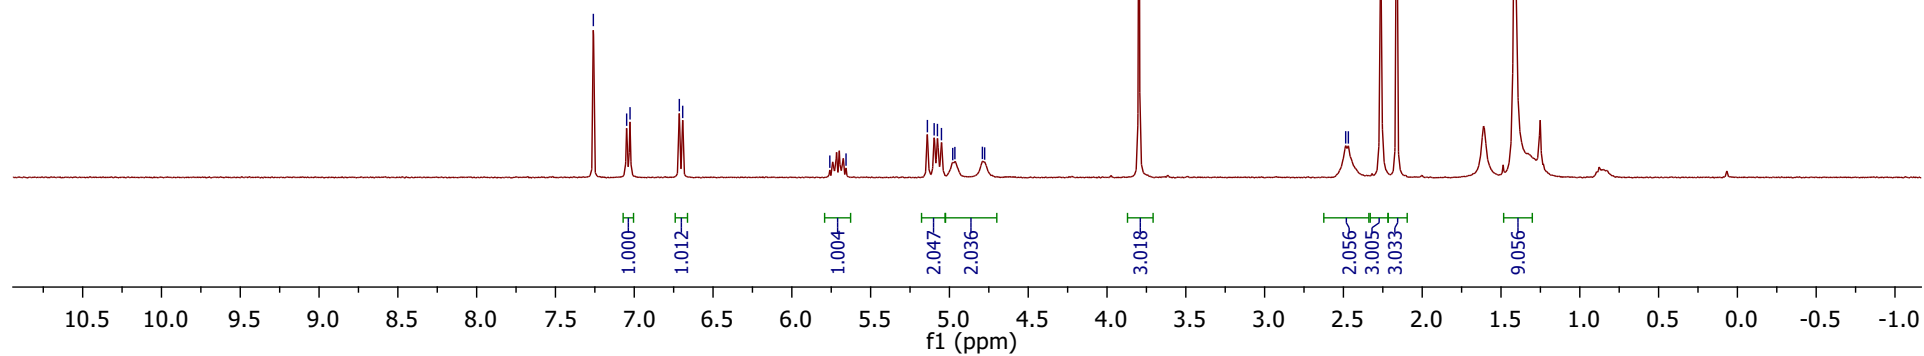



<sup>13</sup>C NMR (CDCl<sub>3</sub>, 101 MHz) **6i**

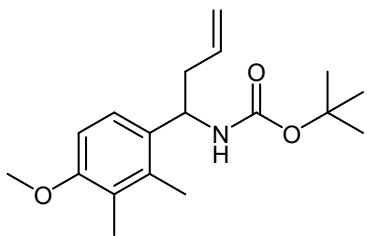

156.5514  
155.2022

135.5787  
134.6474  
132.5744

125.6727  
123.0100  
117.8480

107.7135

79.3467

55.5991  
50.5229

40.6337

28.5178

15.2401  
12.2378

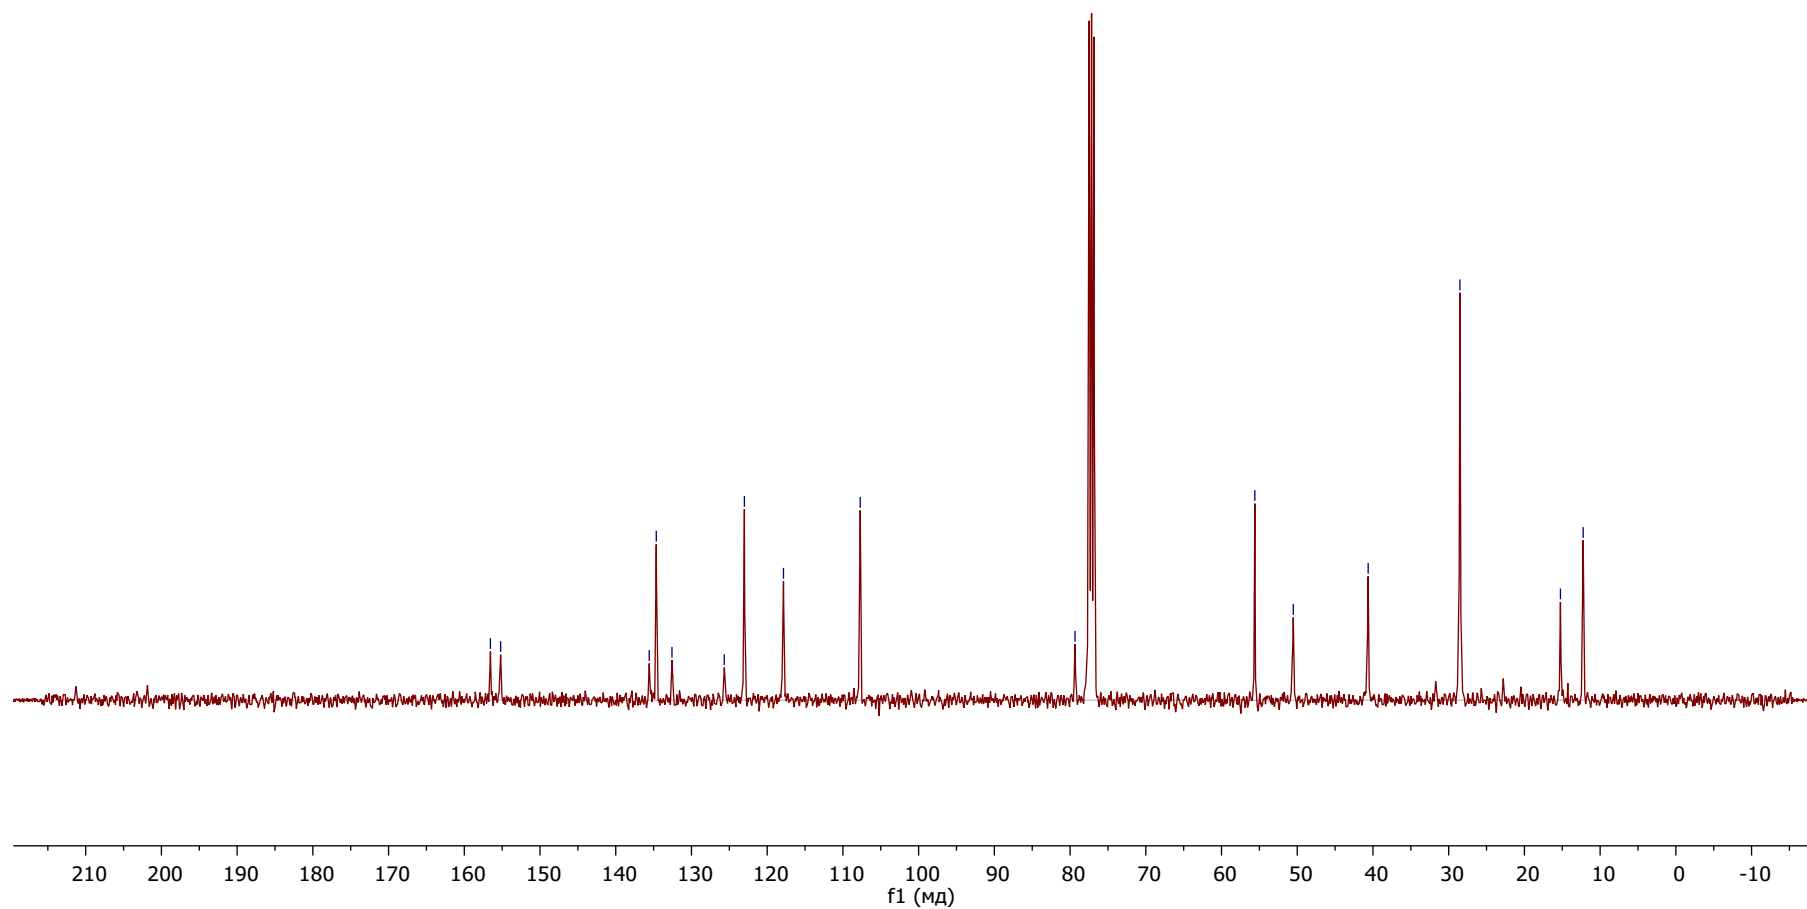

<sup>1</sup>H NMR (CDCl<sub>3</sub>, 400 MHz) 6j

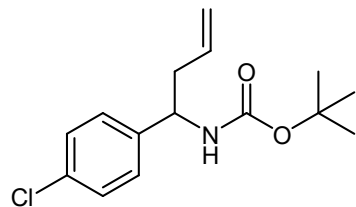

7.3018  
7.2815  
7.2600  
7.2031  
7.1824  
5.6944  
5.6768  
5.6689  
5.6589  
5.6516  
5.6340  
5.6270  
5.6168  
5.6089  
5.5913  
5.1283  
5.1058  
5.0828  
4.8498  
4.6967

2.4711

1.4039

//

s

]

s

s

s

s

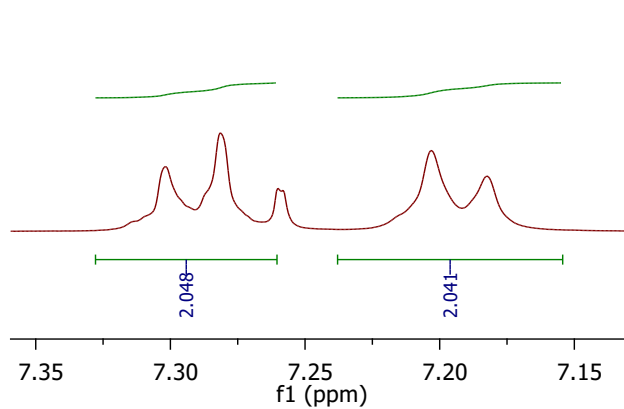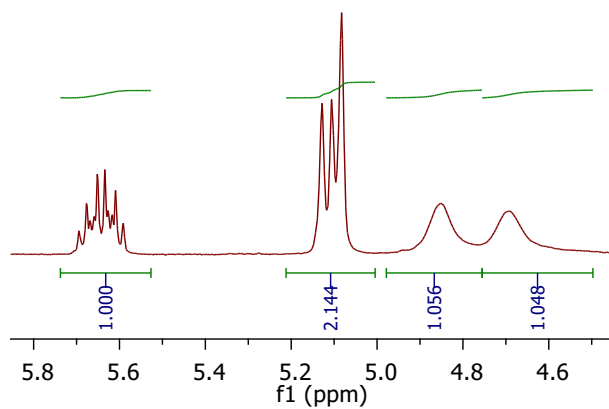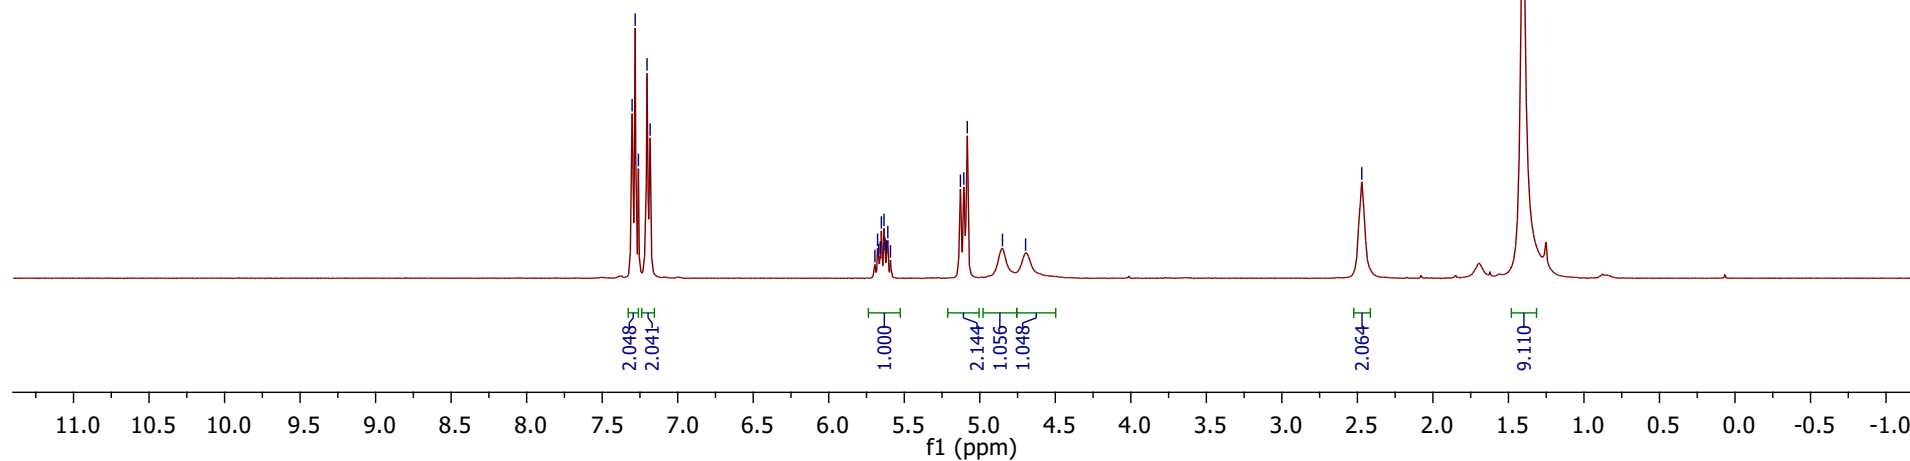

<sup>1</sup>H NMR (CDCl<sub>3</sub>, 400 MHz) **6k**

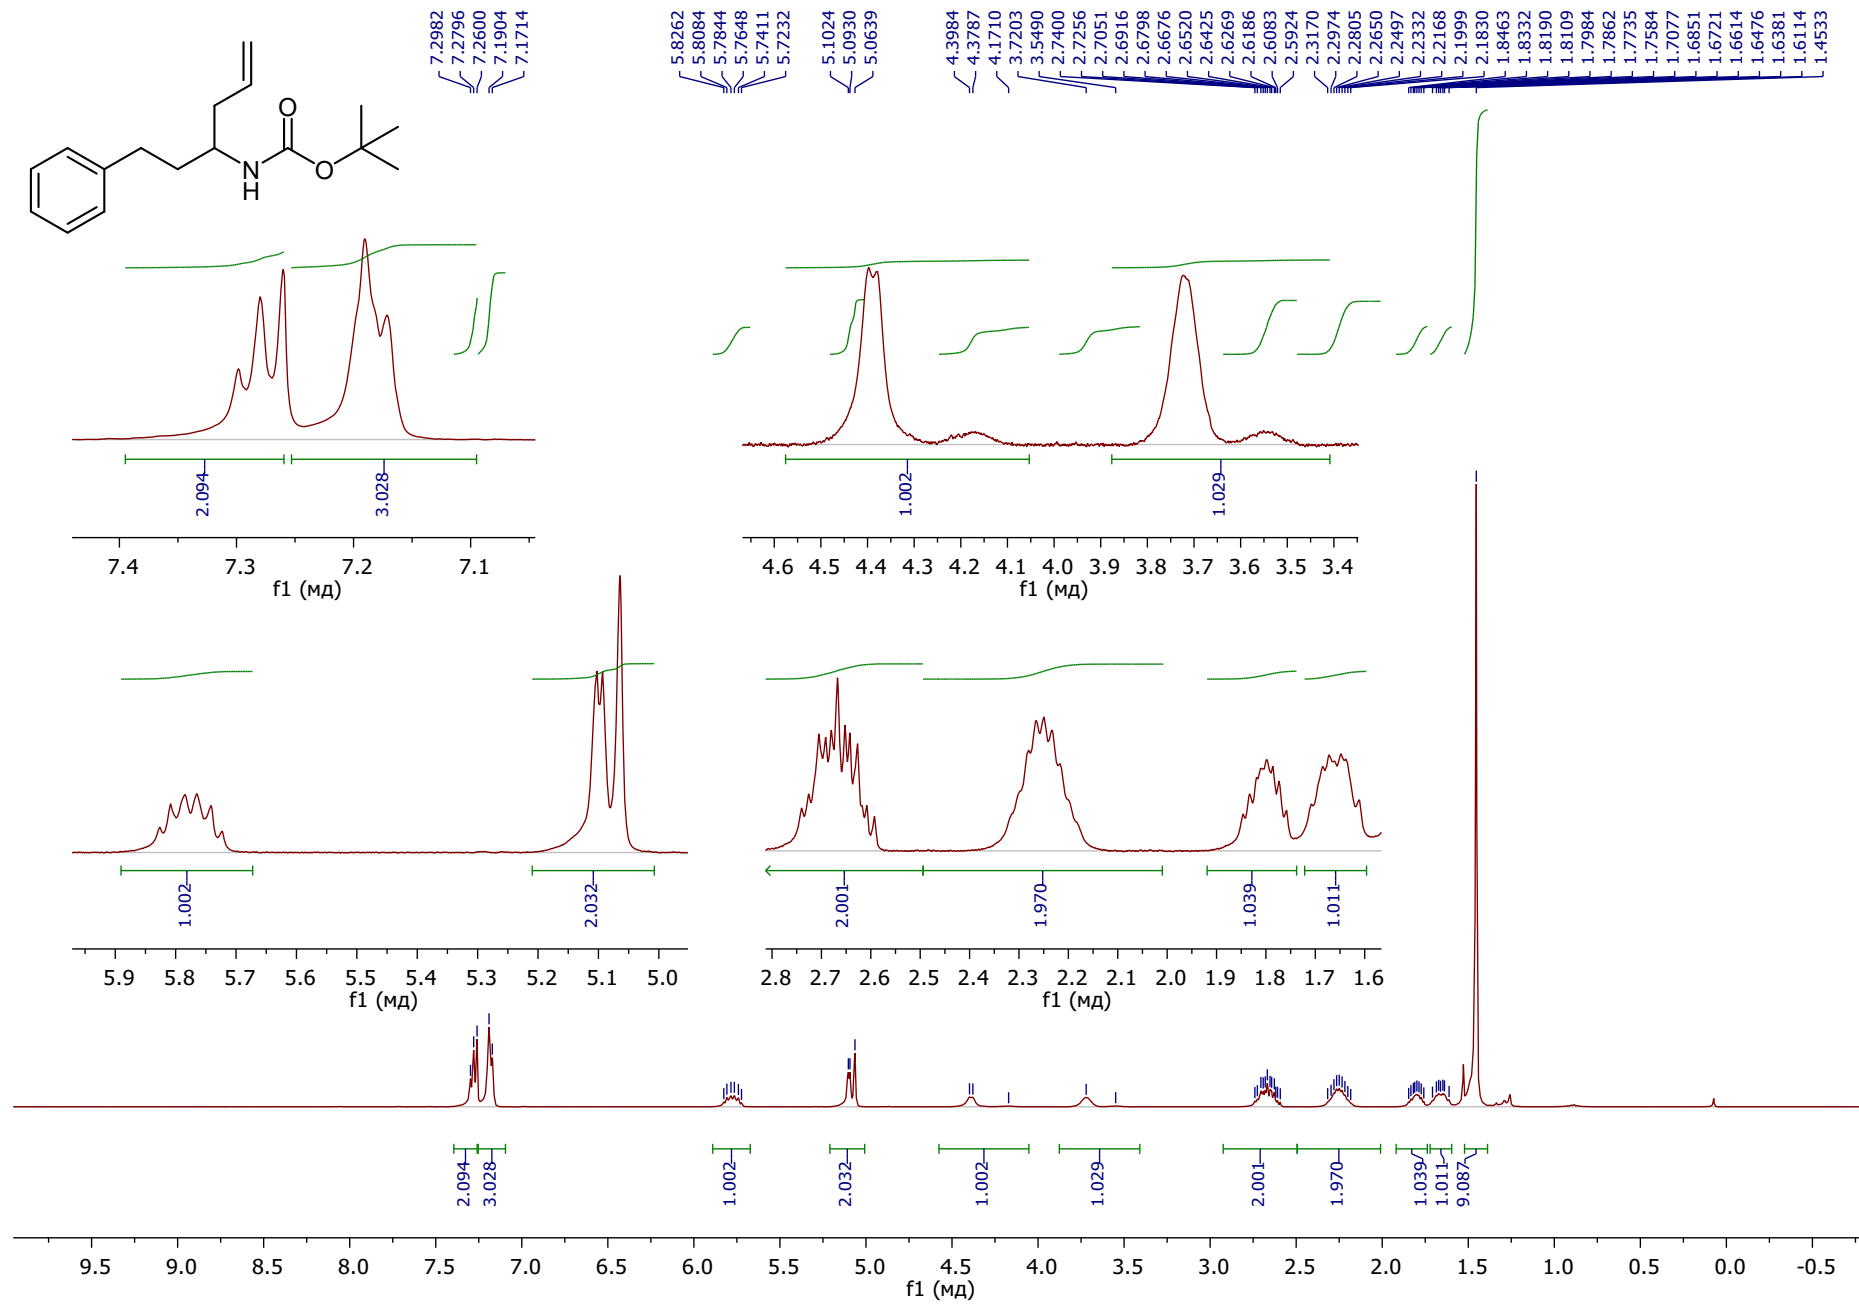

<sup>1</sup>H NMR (CDCl<sub>3</sub>, 400 MHz) **6l**

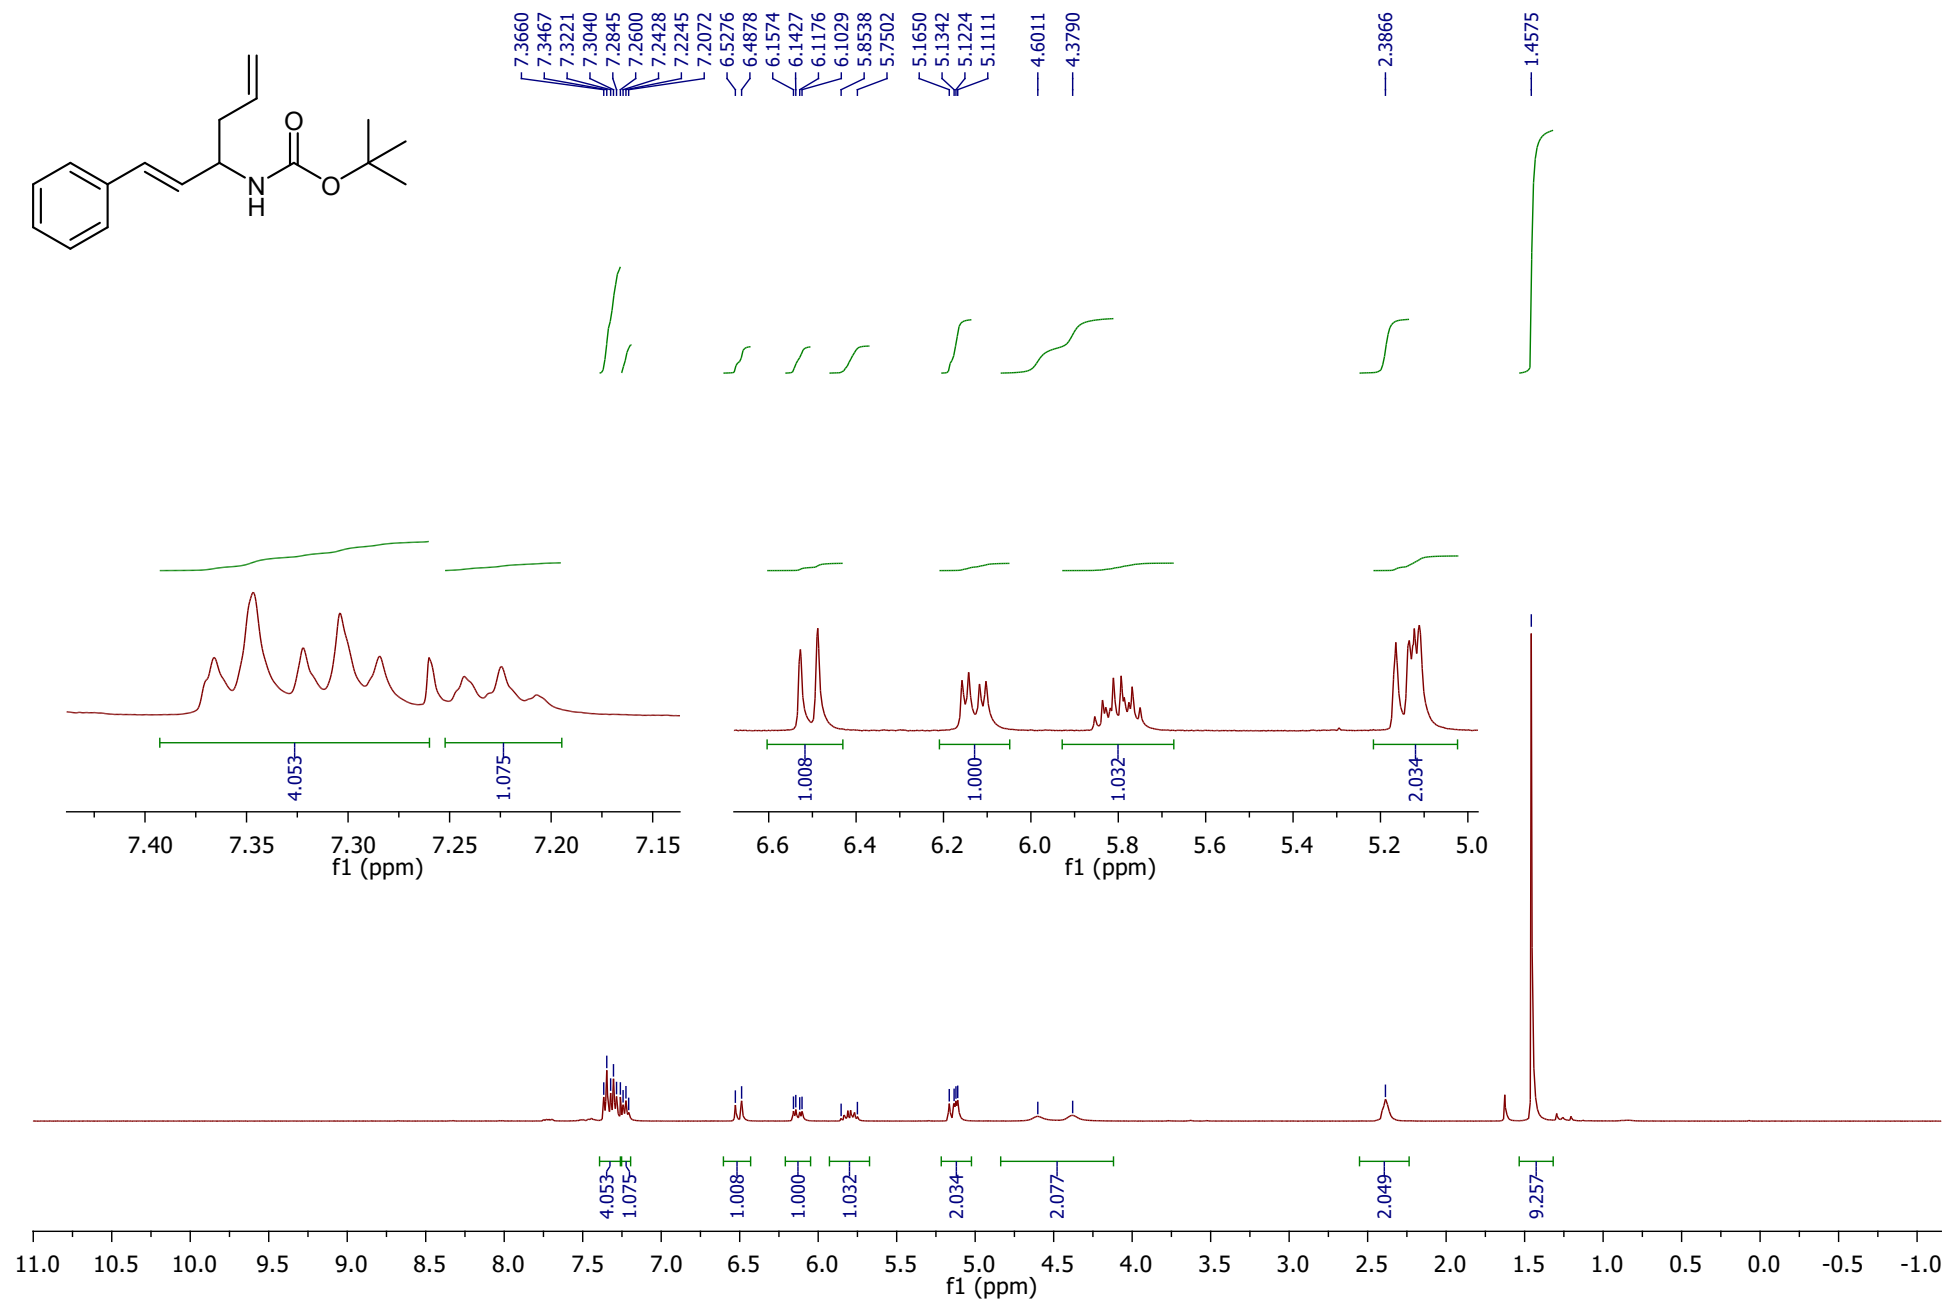

<sup>1</sup>H NMR (CDCl<sub>3</sub>, 400 MHz) **6m**

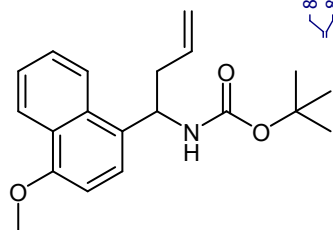

8.3220  
8.3015  
8.0784  
8.0593  
7.5539  
7.5041  
7.4846  
7.3435  
7.3234  
7.2595  
6.7814  
6.7619  
5.8147  
5.7986  
5.7740  
5.7560  
5.7314  
5.7140  
5.4840  
5.1775  
5.1349  
5.0954  
5.0695  
4.8878  
3.9951  
2.7258  
2.6830  
1.4295

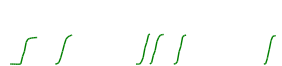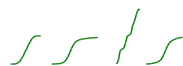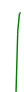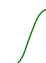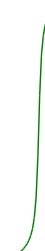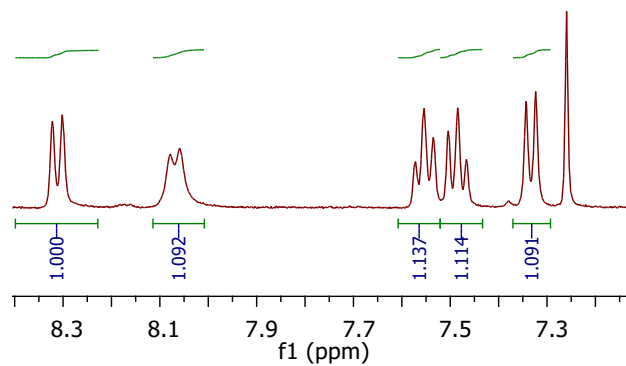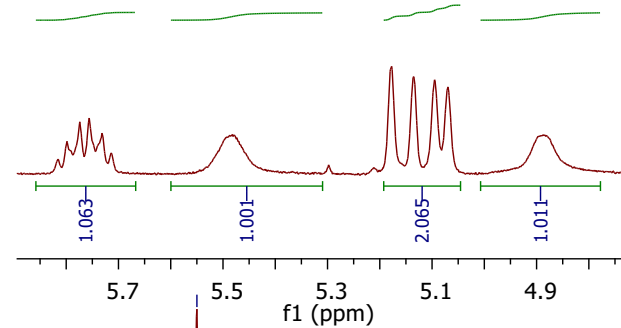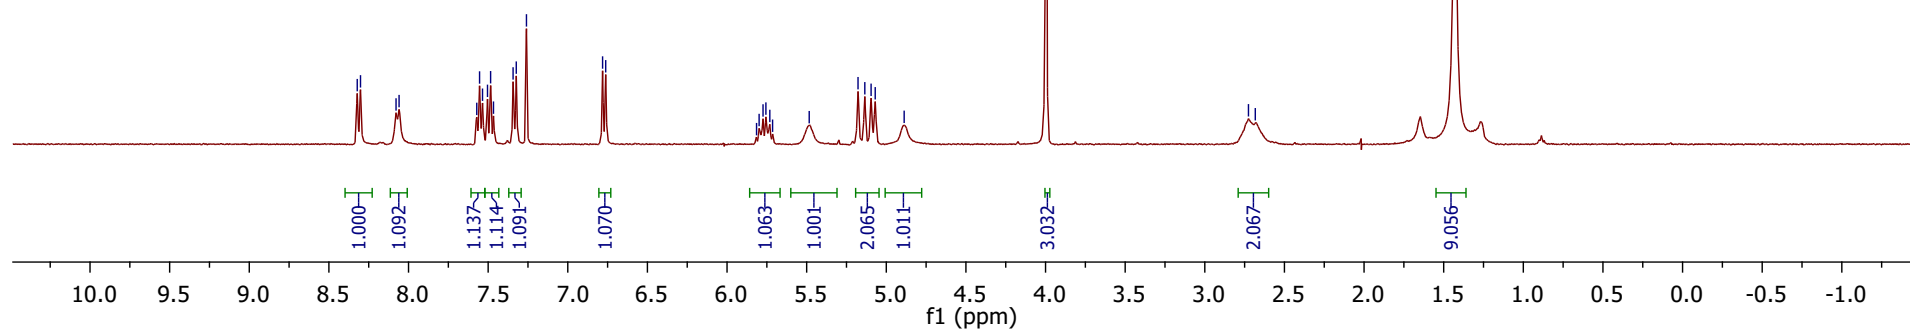

<sup>13</sup>C NMR (CDCl<sub>3</sub>, 101 MHz) **6m**

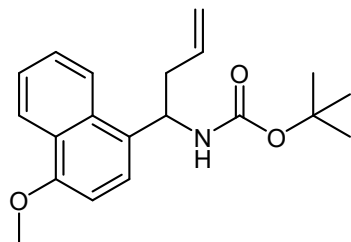

155.2932  
155.0890

134.6335  
131.9647  
131.4582  
129.6918  
126.9374  
126.1204  
125.1423  
123.0120  
122.7940  
117.9284

103.0377

79.5003

55.5959

49.7884

40.2646

28.5040

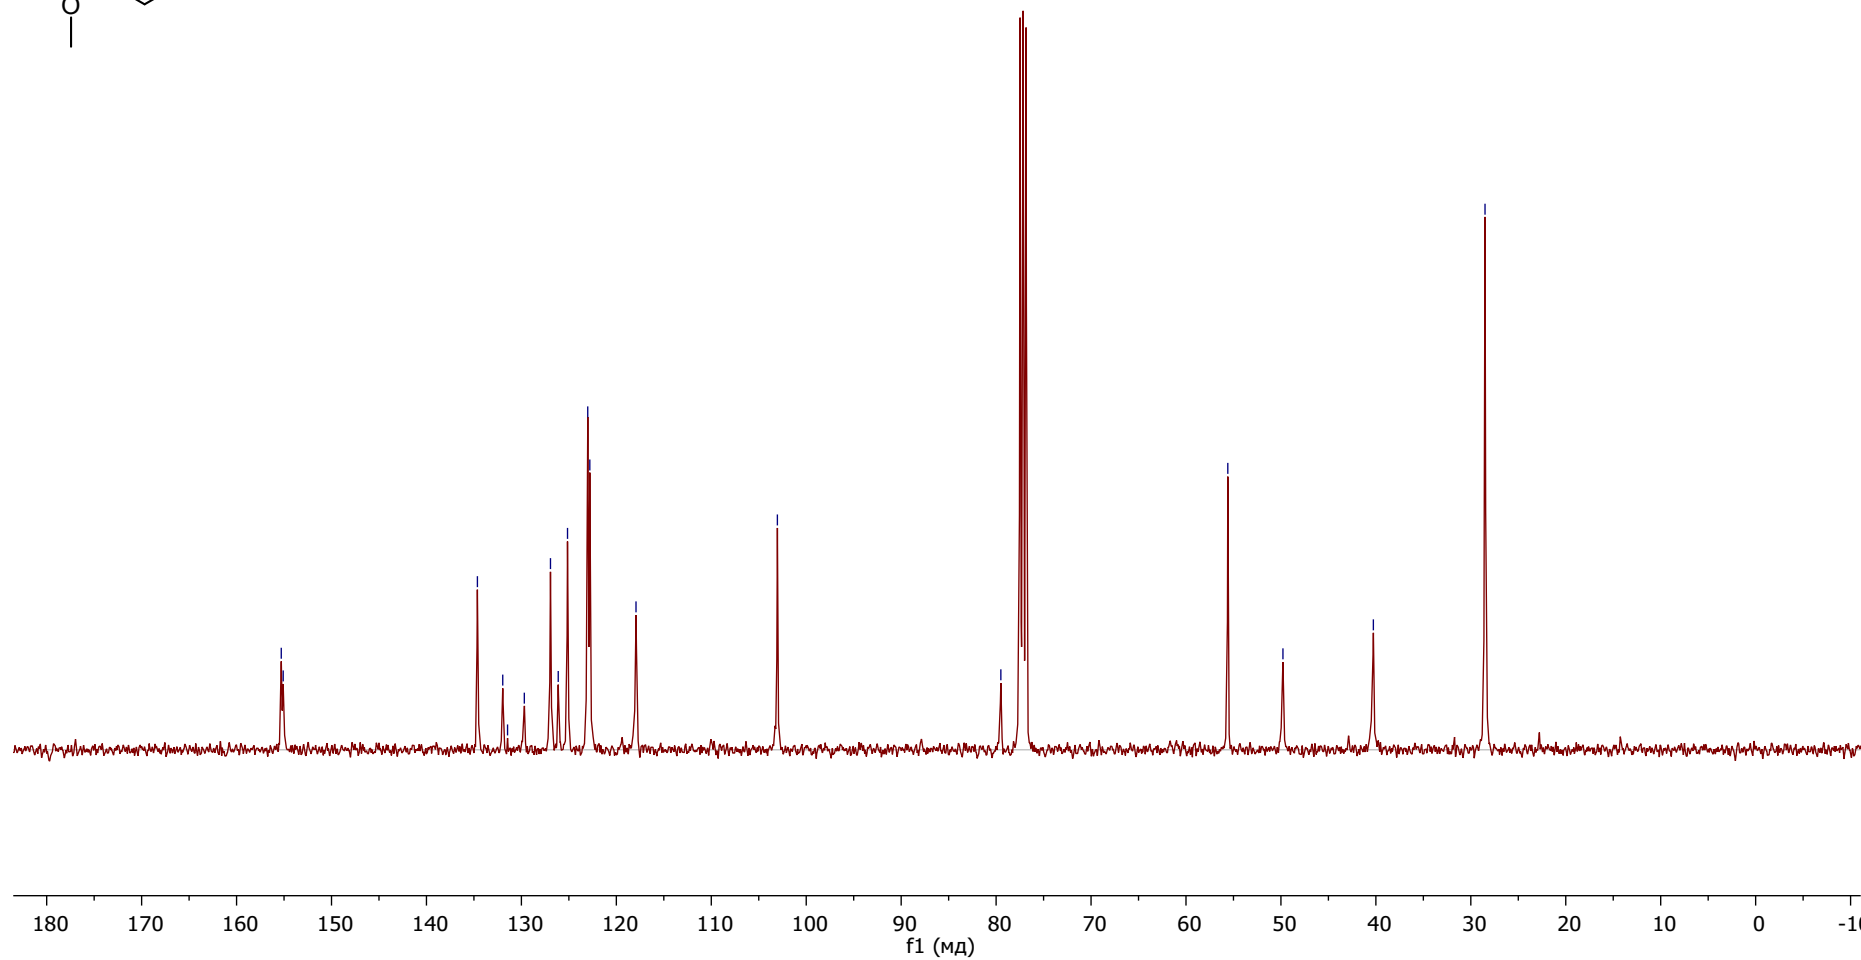

<sup>1</sup>H NMR (CDCl<sub>3</sub>, 400 MHz) **6n**

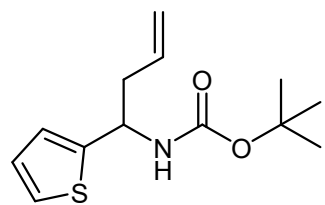

7.1954  
6.9360  
5.8217  
5.7970  
5.7695  
5.7431  
5.7156  
5.6884  
5.1758  
5.1240  
5.0952  
5.0343  
4.8409  
2.6155  
1.4389

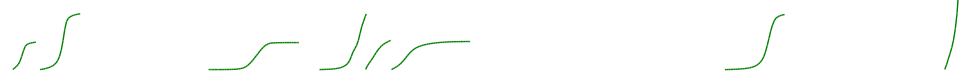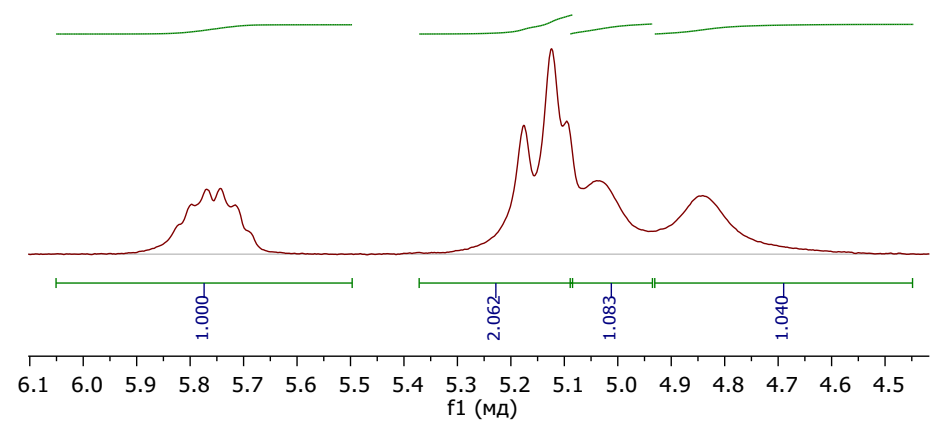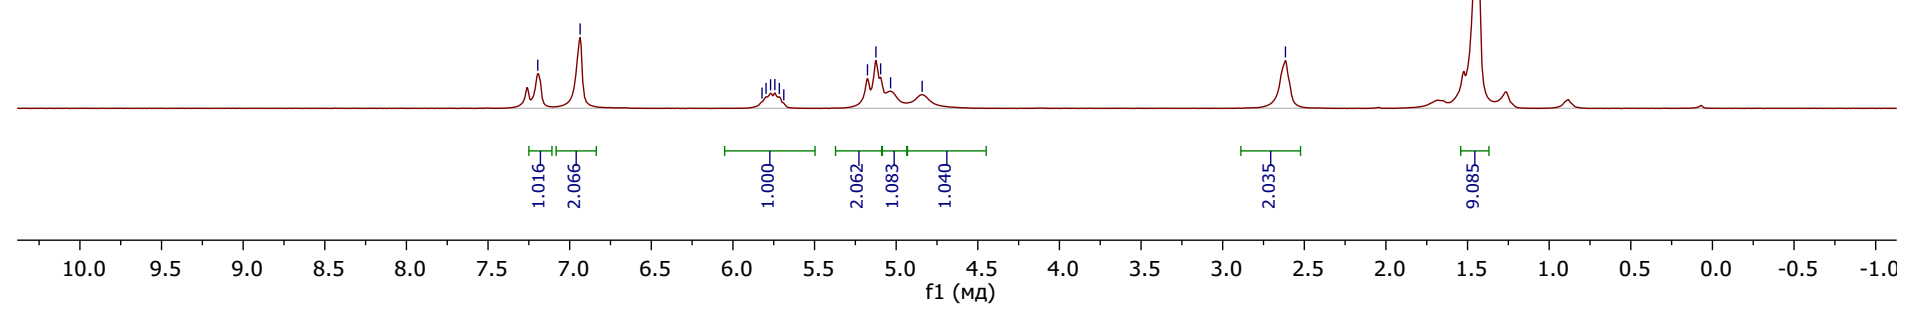

<sup>1</sup>H NMR (CDCl<sub>3</sub>, 400 MHz) **6o**

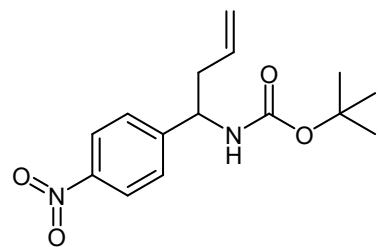

8.1998  
8.1797

7.4411  
7.4208  
7.2595

5.6841  
5.6664  
5.6415  
5.6230  
5.5992  
5.5814  
5.1553  
5.1272  
5.1154  
4.9670  
4.7914

2.4940

1.4034

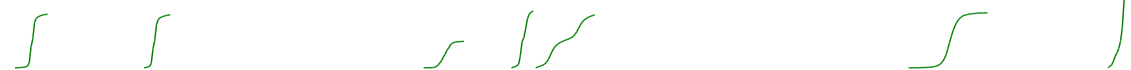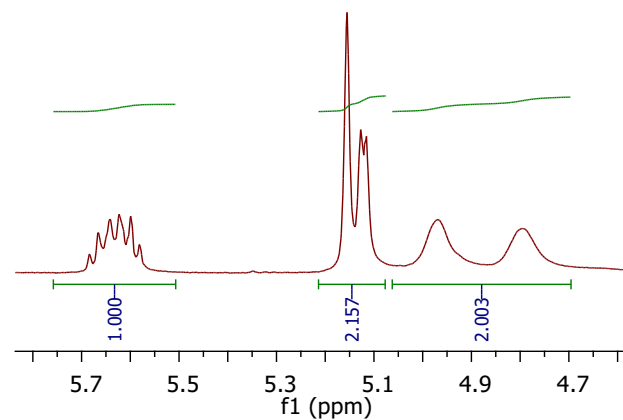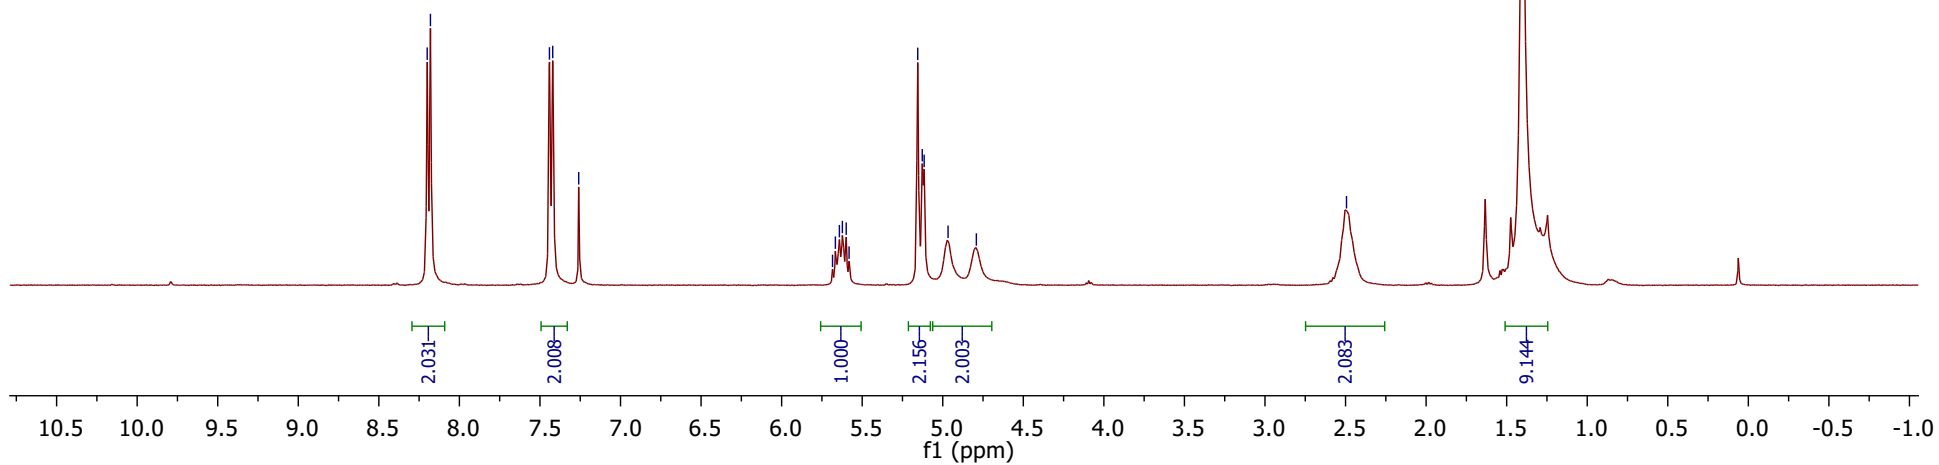



<sup>1</sup>H NMR (CDCl<sub>3</sub>, 400 MHz) **6p**

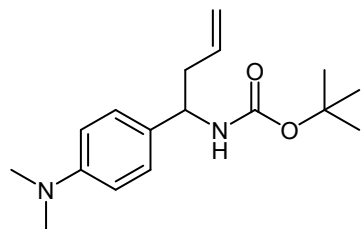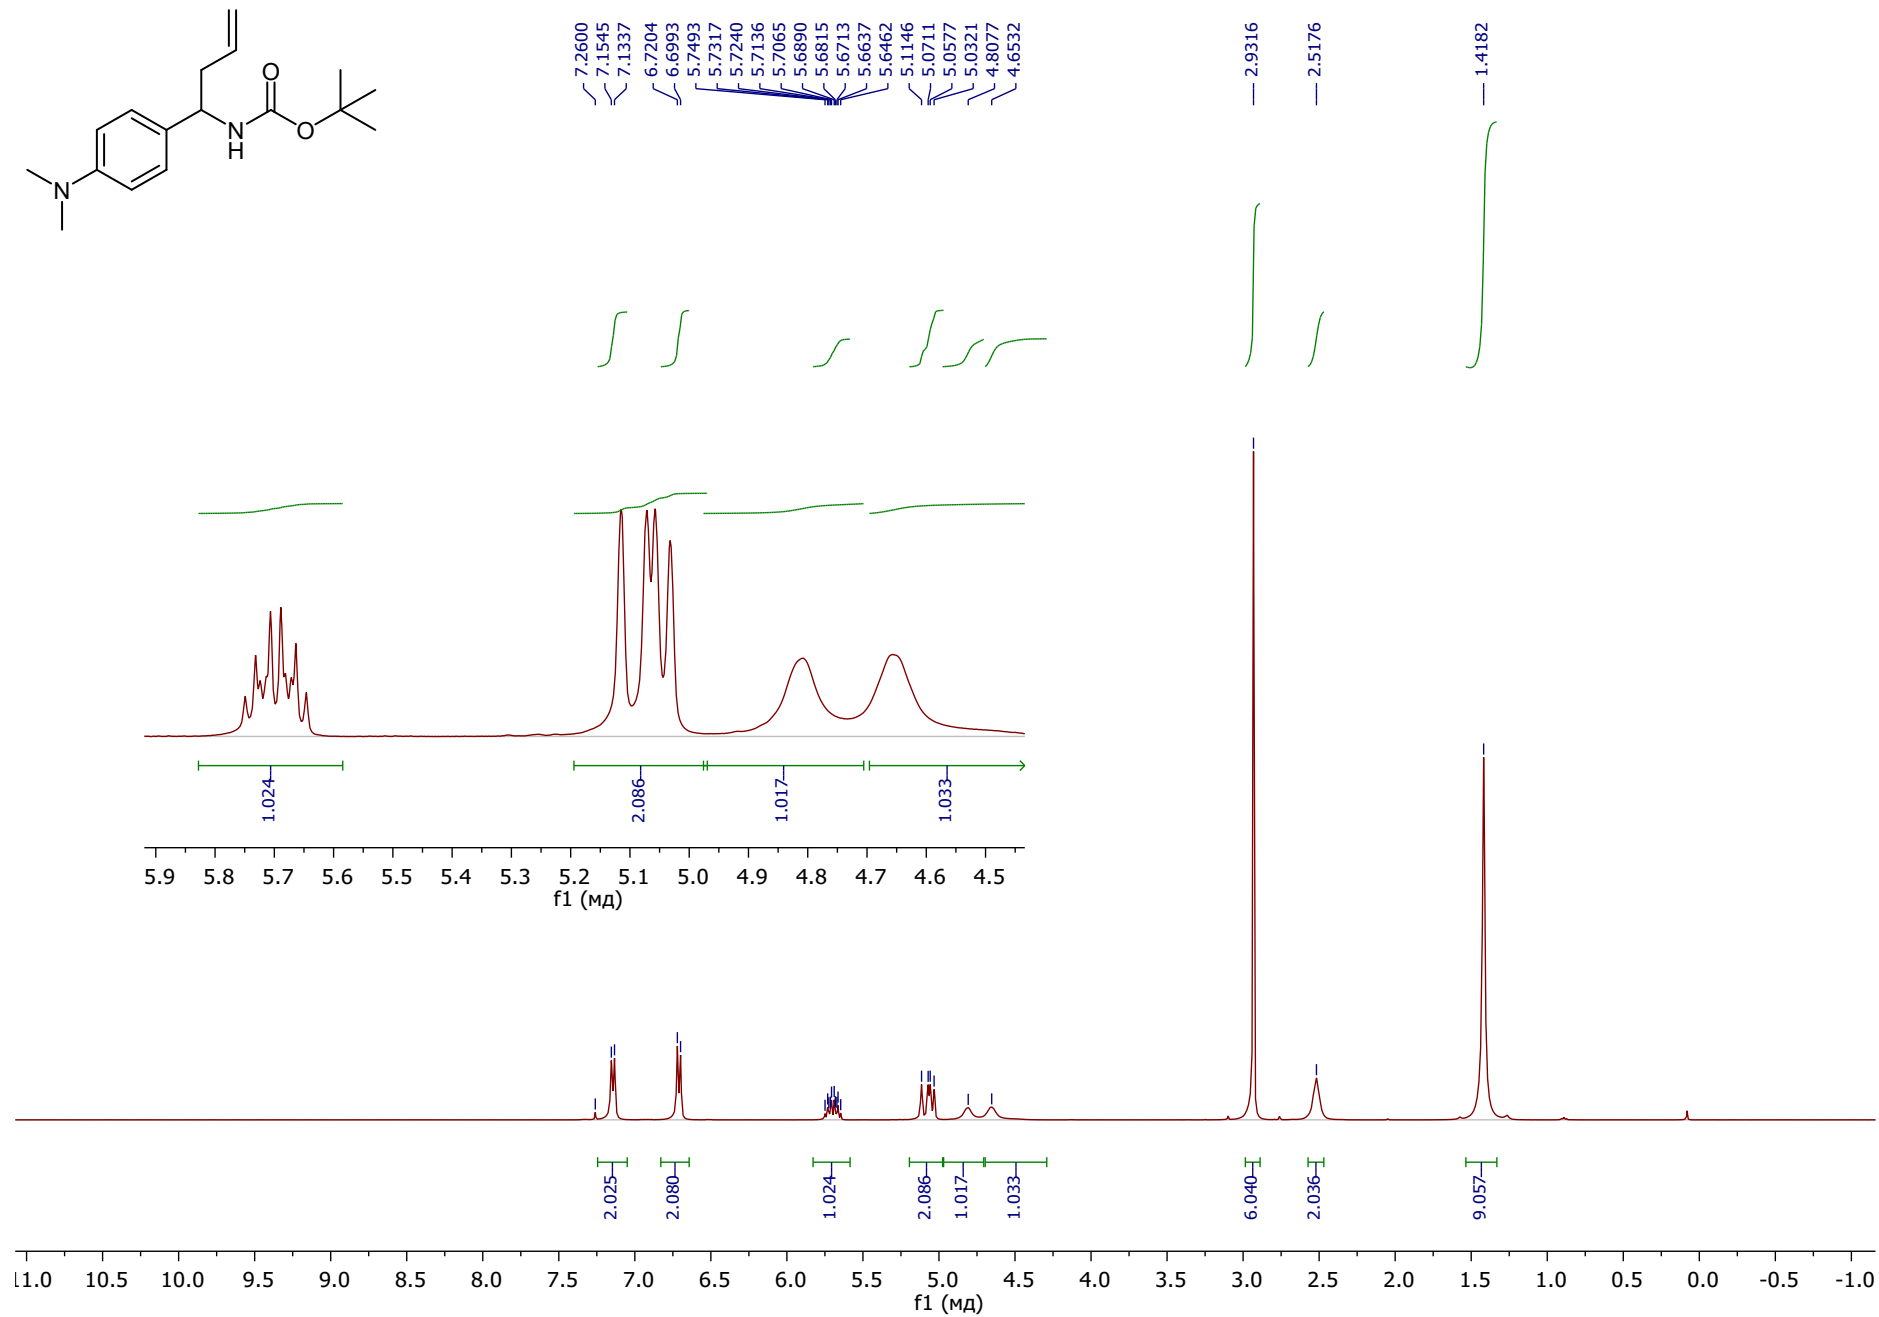

<sup>13</sup>C NMR (CDCl<sub>3</sub>, 101 MHz) **6p**

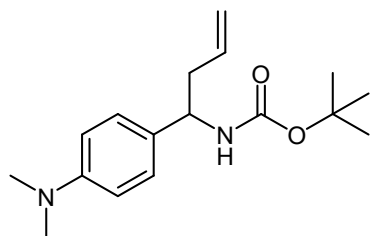

- 155.2962
- 149.8289
- 134.6779
- 130.3398
- 127.2556
- 117.7355
- 112.7665
- 79.2686
- 53.6644
- 41.1612
- 40.8125
- 28.5012

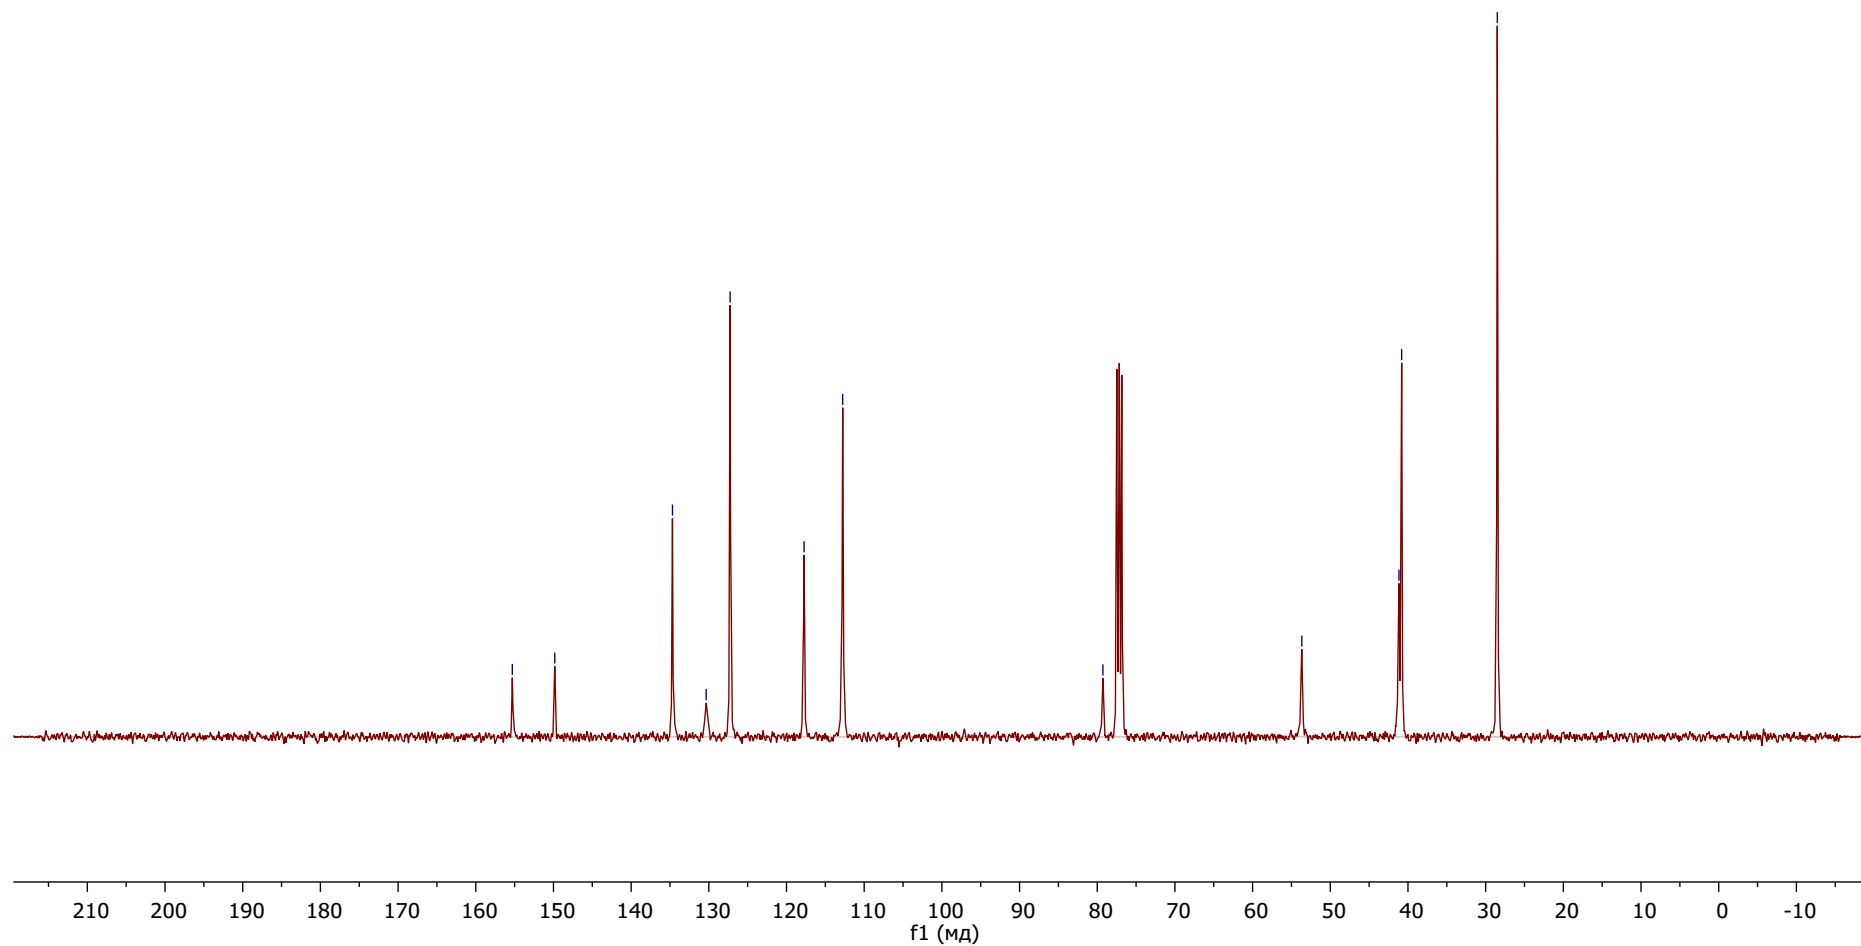

<sup>1</sup>H NMR (CDCl<sub>3</sub>, 400 MHz) 6q

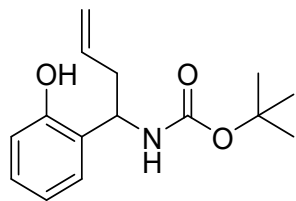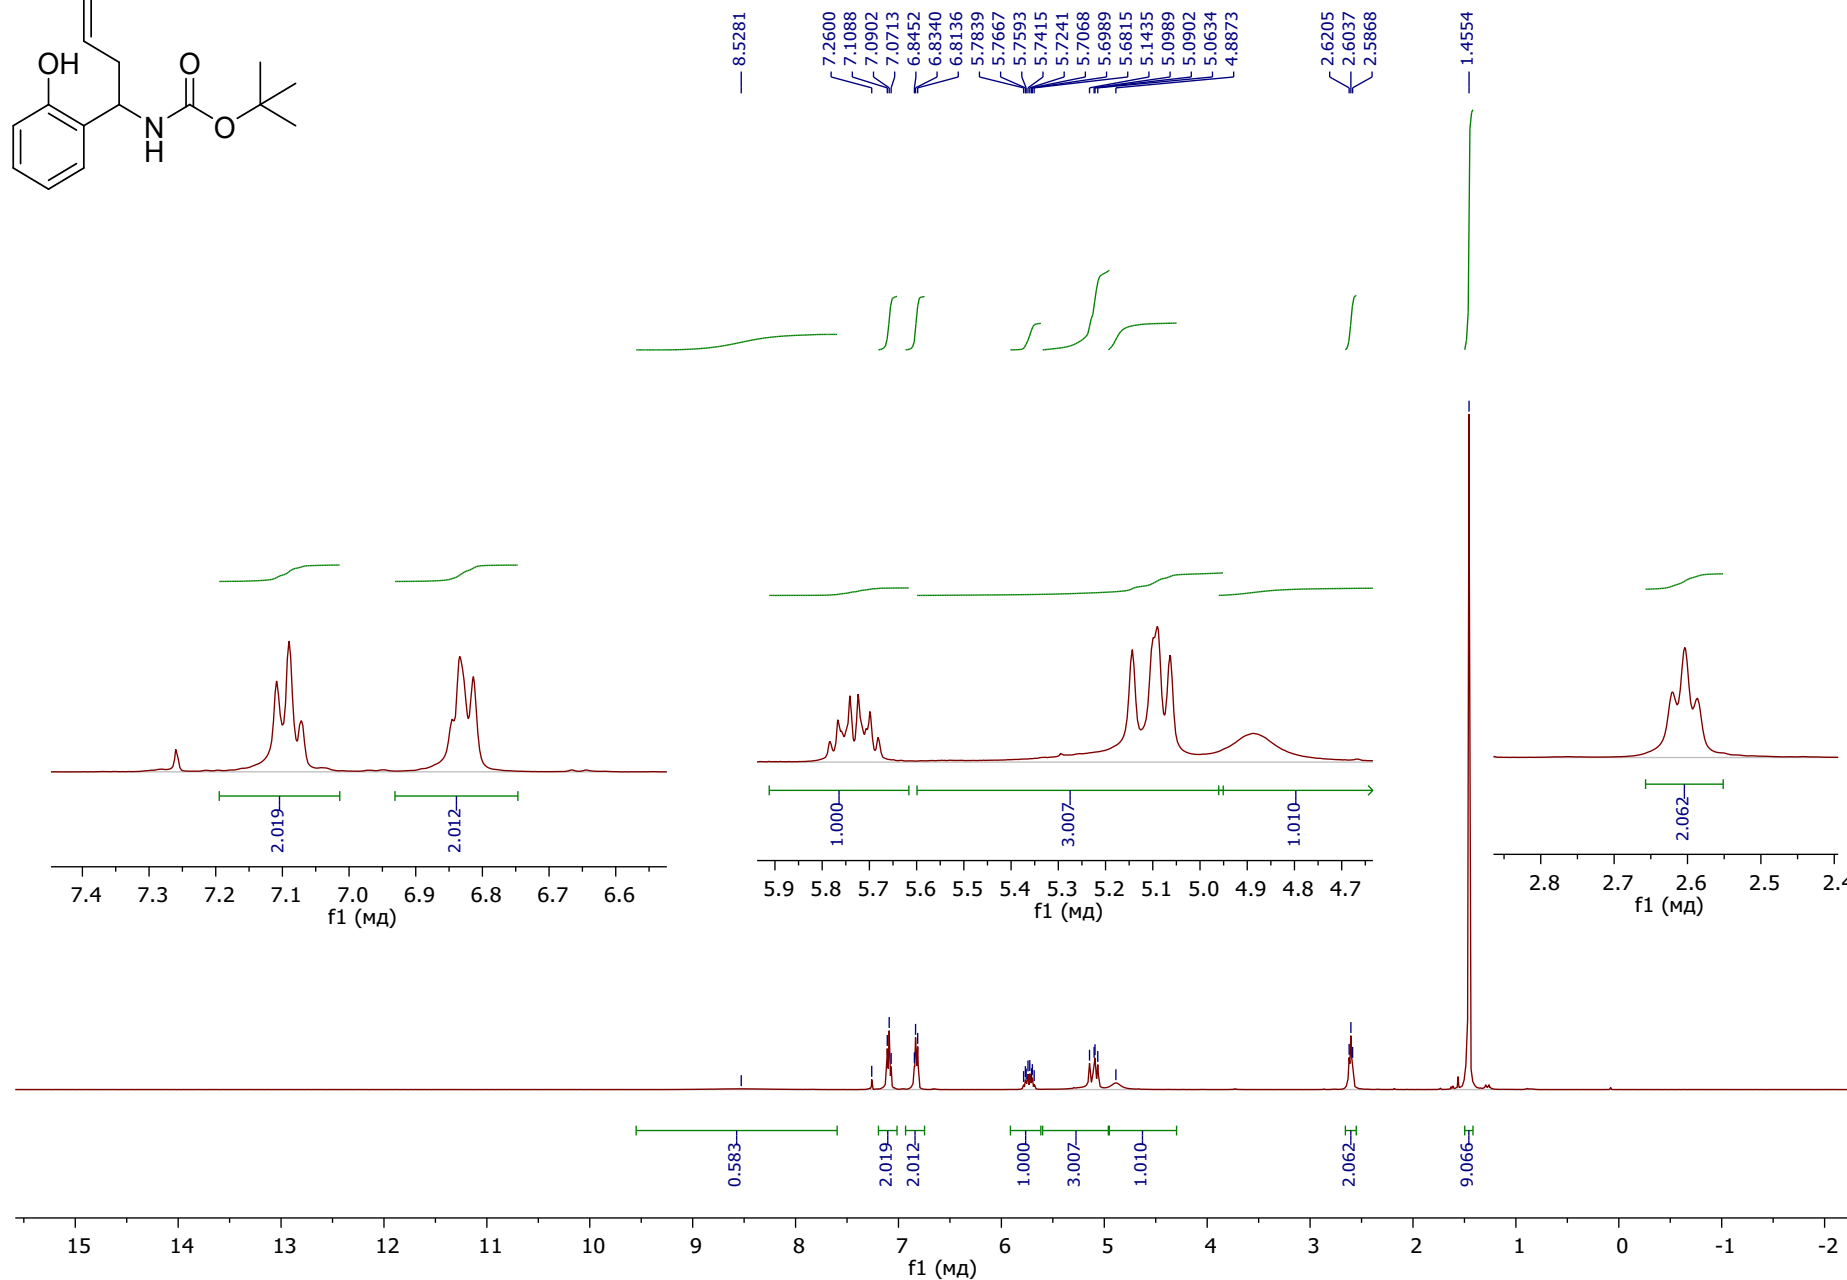

<sup>13</sup>C NMR (CDCl<sub>3</sub>, 101 MHz) **6q**

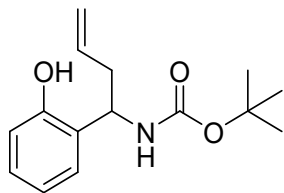

— 157.1716  
— 154.8307

— 134.7262  
— 128.6732  
— 128.0371  
— 126.6285  
— 119.9581  
— 117.9232  
— 117.1275

— 80.8348

— 48.9488

— 38.7242

— 28.4959

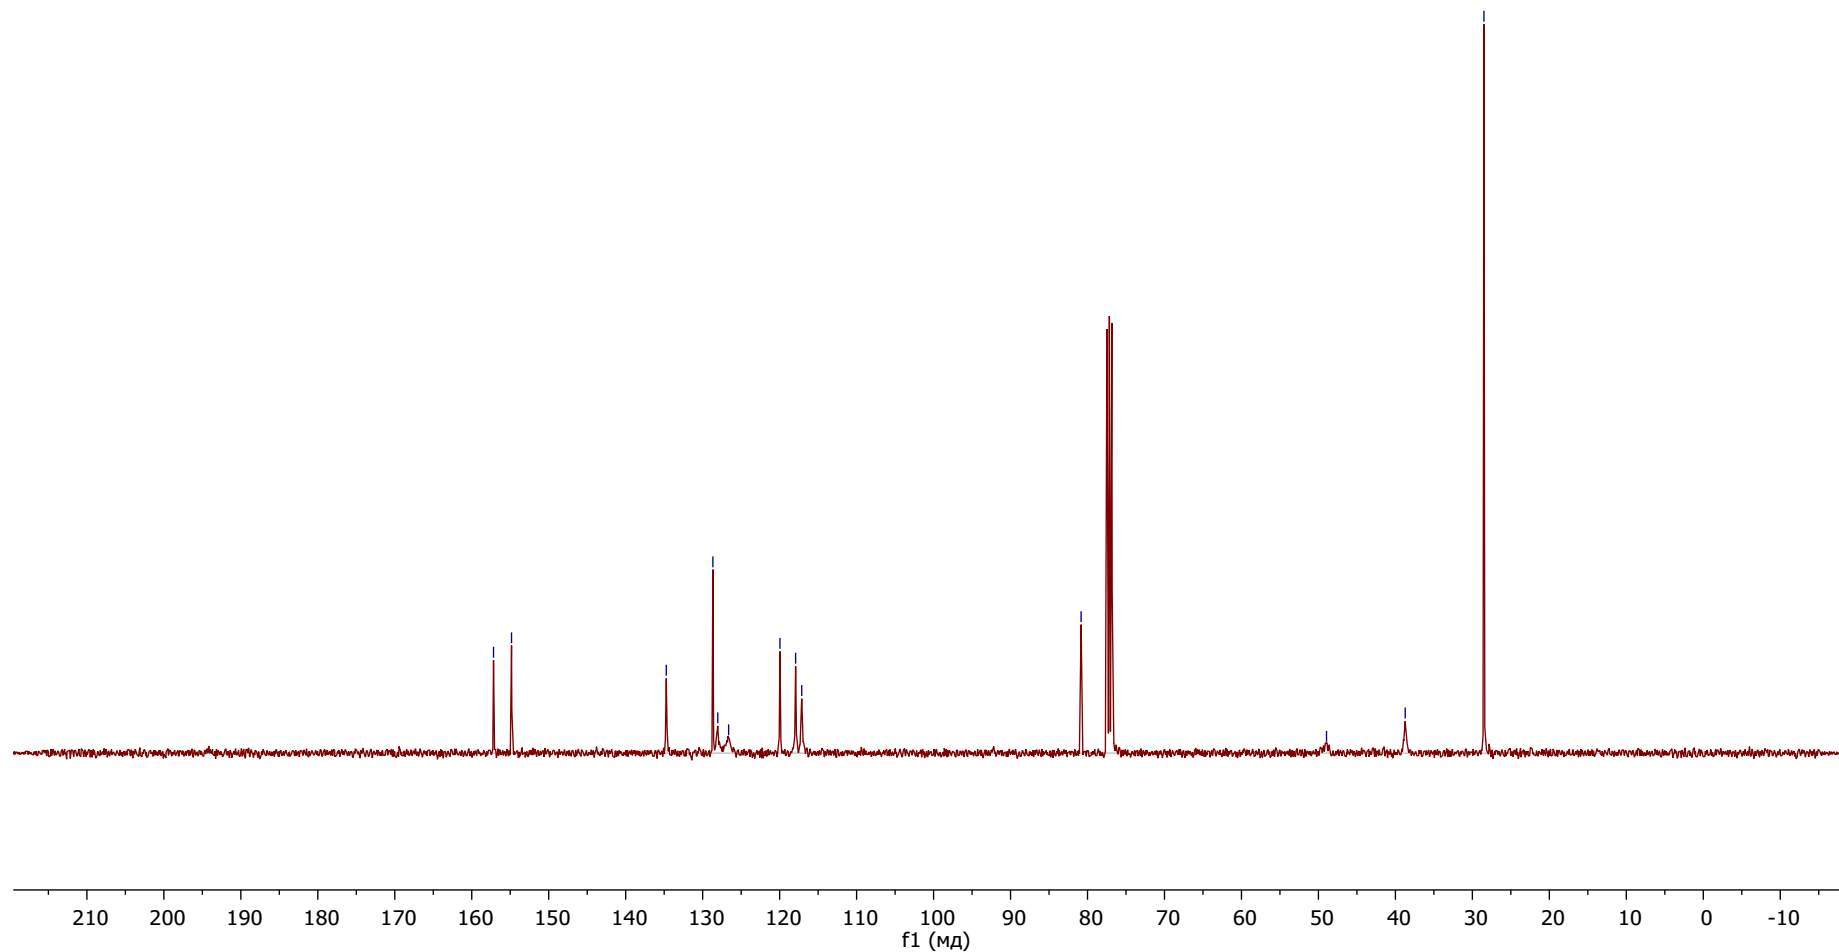

<sup>1</sup>H NMR (CDCl<sub>3</sub>, 400 MHz) **6r**

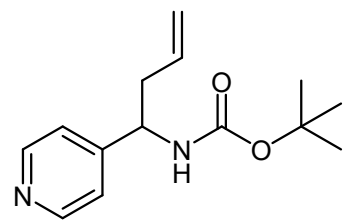

8.5383

7.2603  
7.2176  
7.2061

5.6603  
5.5570

5.1149  
5.1122  
5.0832  
4.9764

2.4620

1.3865

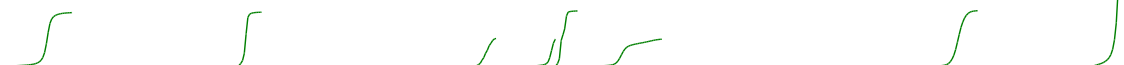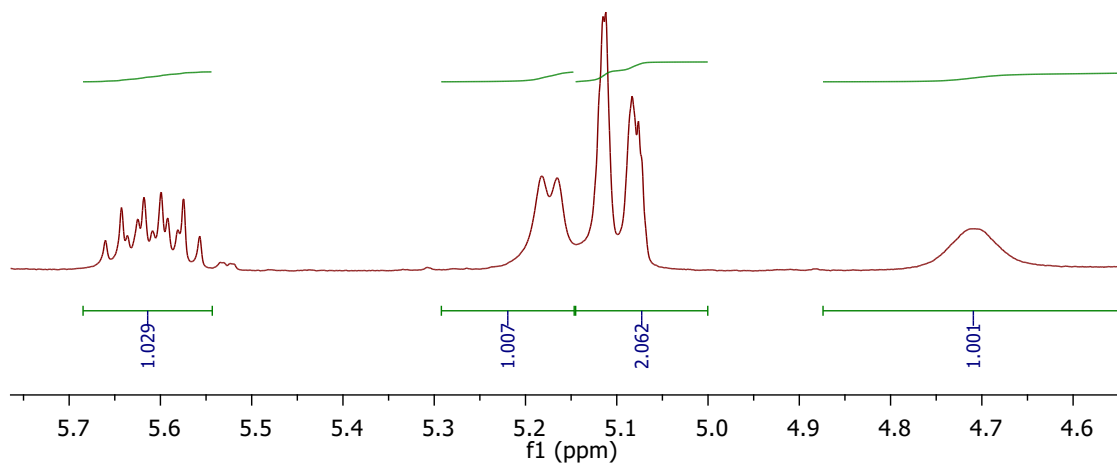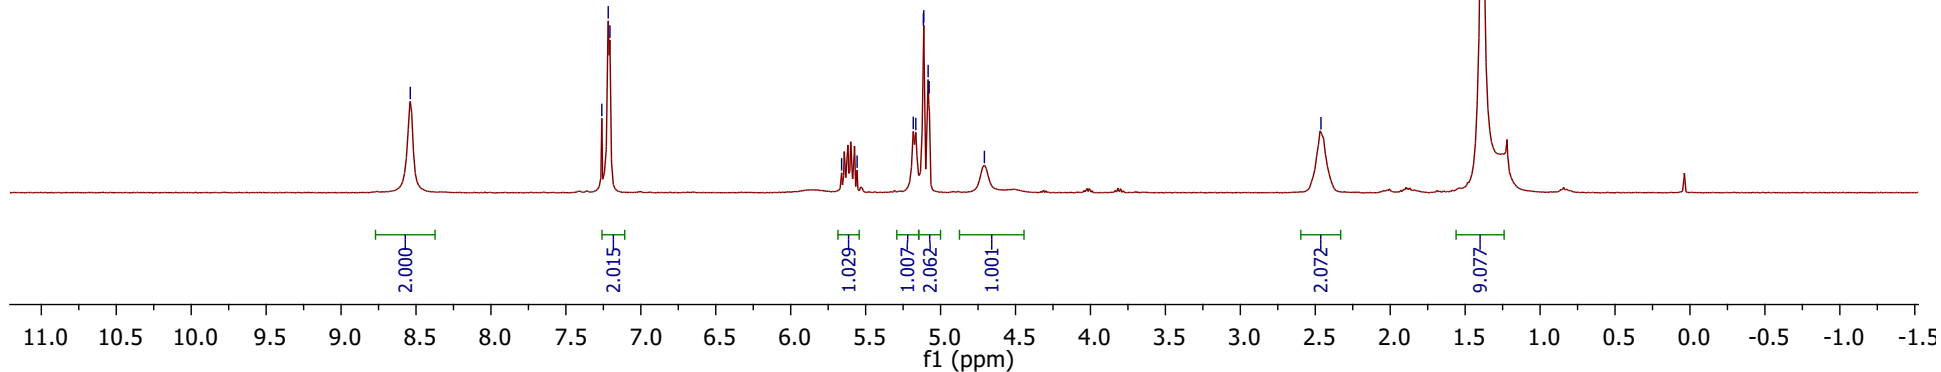

<sup>13</sup>C NMR (CDCl<sub>3</sub>, 101 MHz) **6r**

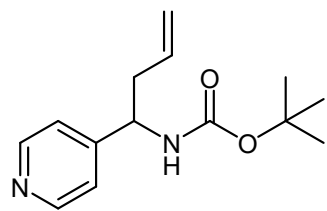

— 155.2187  
— 152.5184  
— 149.3417

— 132.8411

— 121.6340  
— 119.3445

— 80.0944

— 53.2762

— 40.5015

— 28.3685

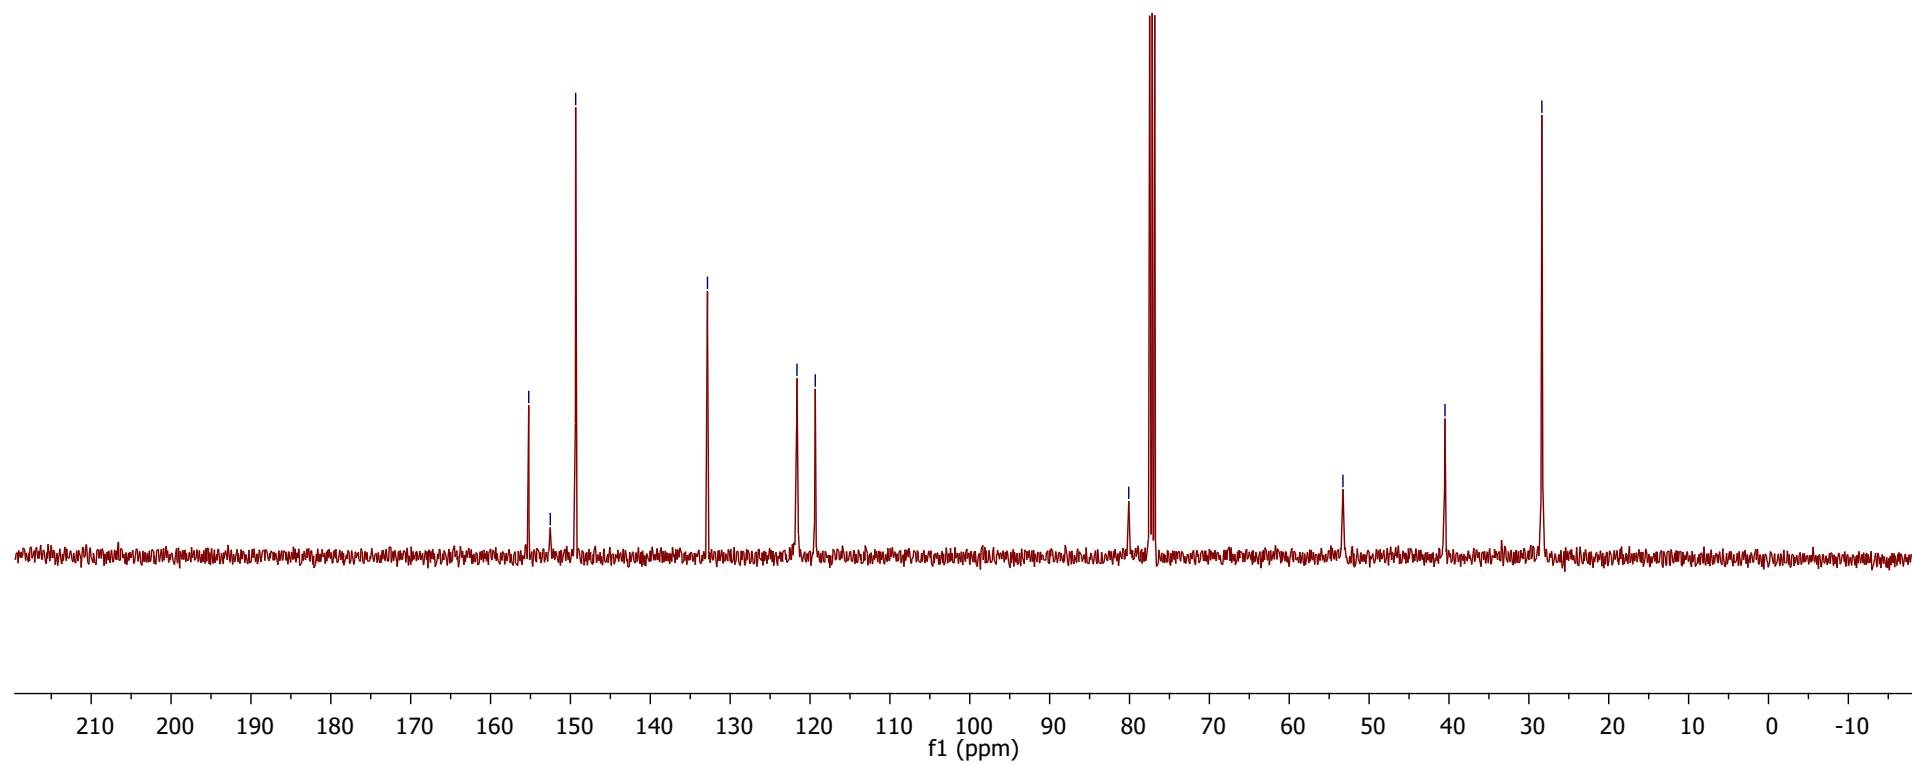

<sup>1</sup>H NMR (CDCl<sub>3</sub>, 400 MHz) 6s

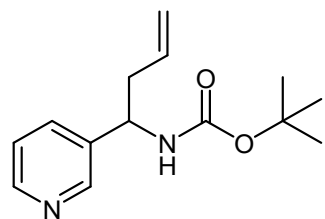

8.5221  
8.4476

7.5948  
7.5752  
7.2443  
7.2321  
7.2251  
7.2130

5.6583  
5.5552  
5.3413  
5.0659  
5.0546  
5.0264  
4.7121

2.4632

1.3386

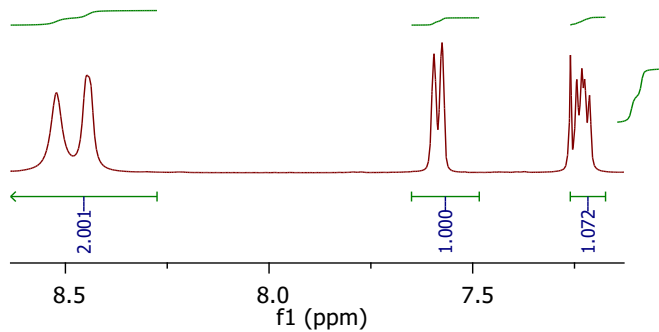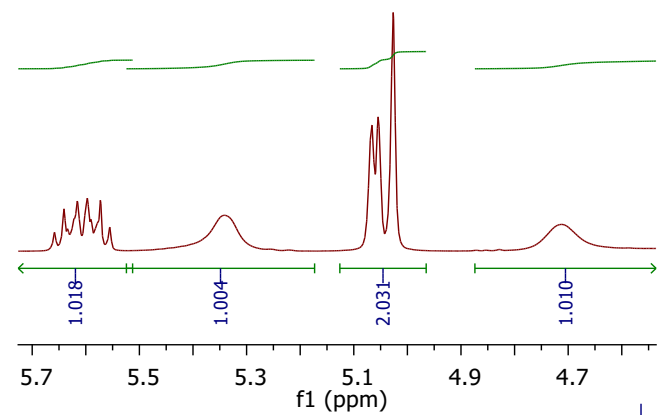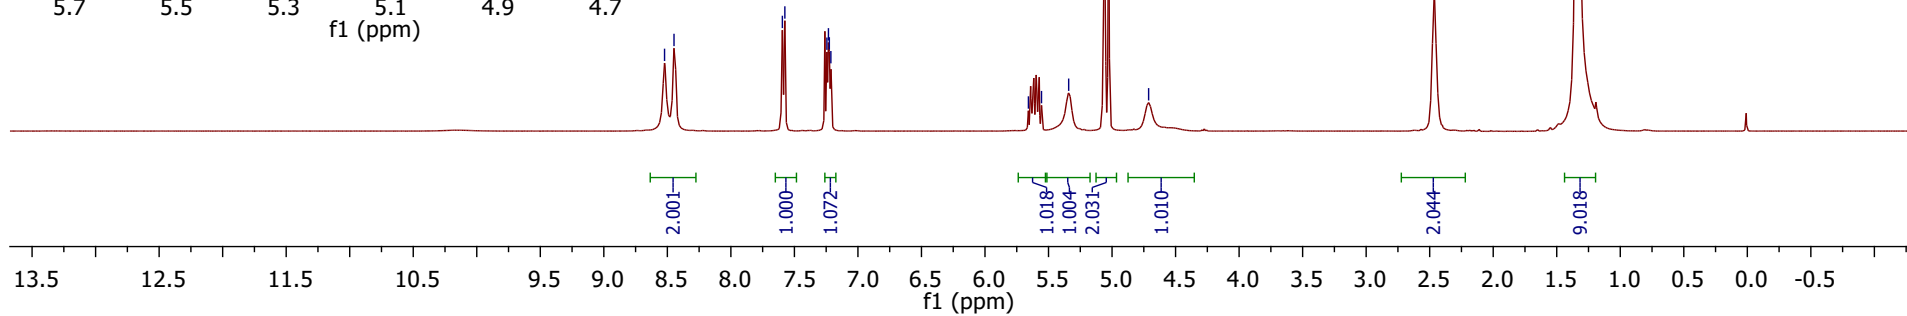

<sup>13</sup>C NMR (CDCl<sub>3</sub>, 101 MHz) **6s**

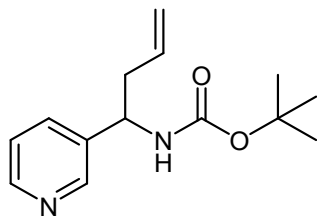

- 155.1786
- 147.7850
- 147.5516
- 138.4864
- 134.6821
- 133.1218
- 123.5480
- 118.9835
- 79.7844
- 52.1278
- 40.7676
- 28.2992

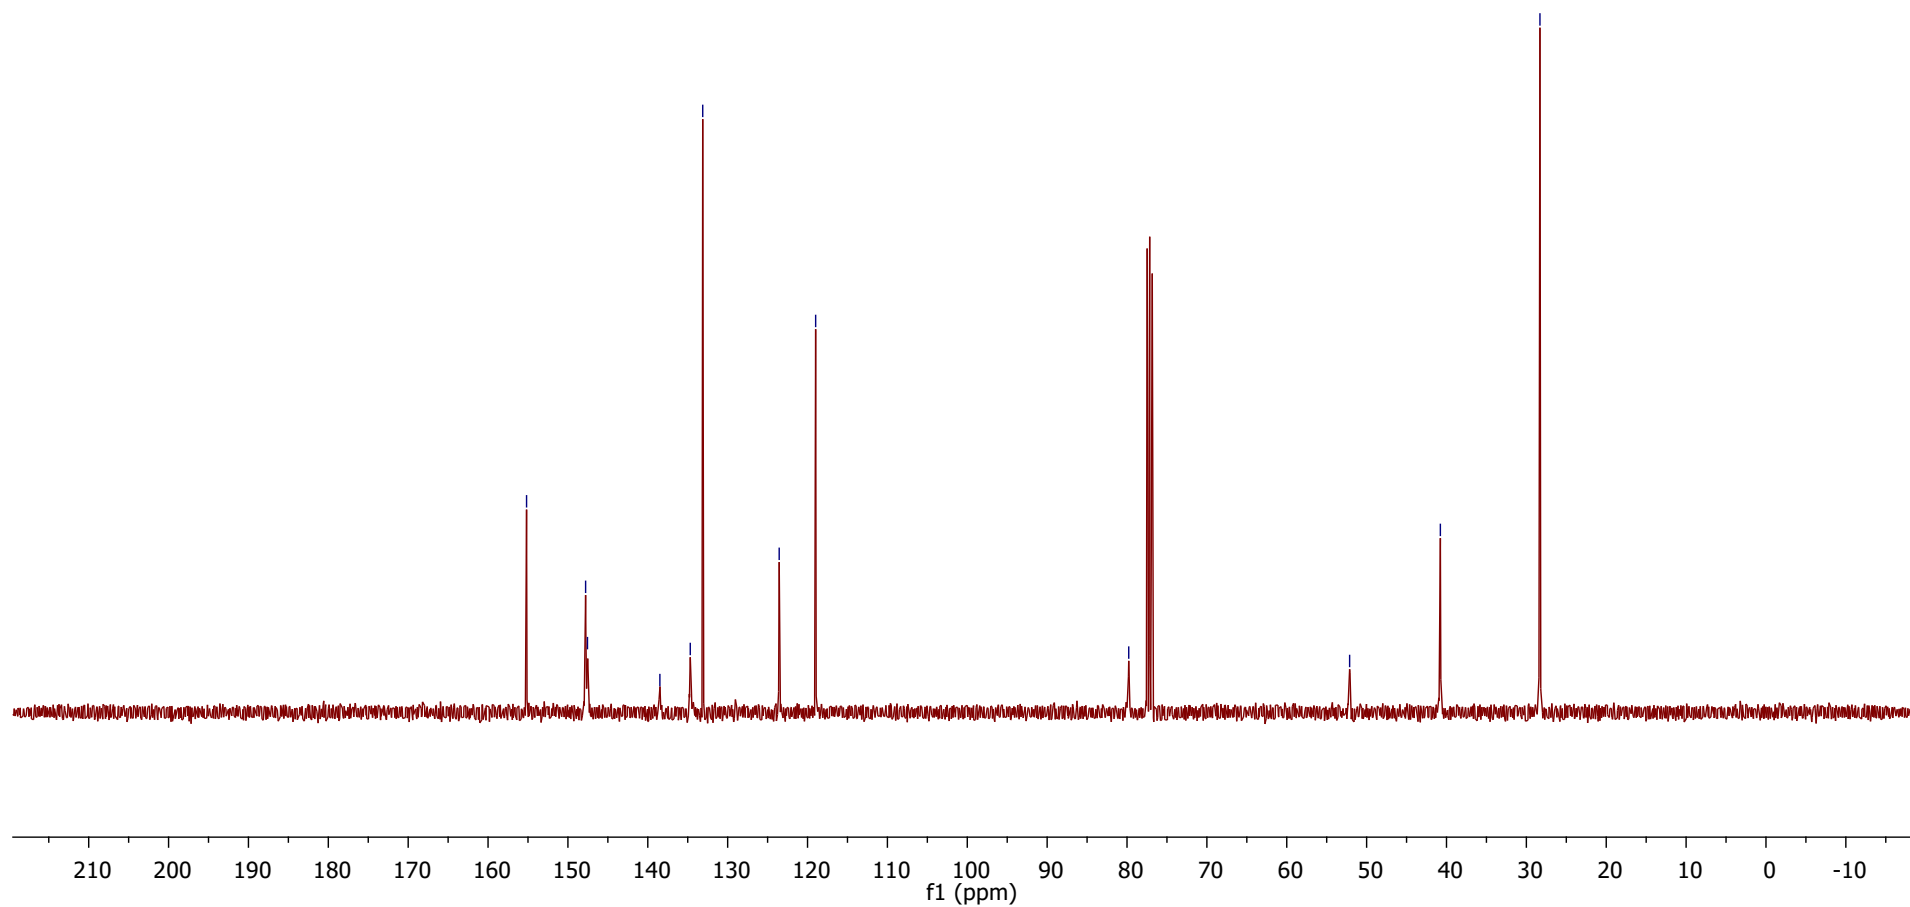



<sup>1</sup>H NMR (CDCl<sub>3</sub>, 400 MHz) **6t**

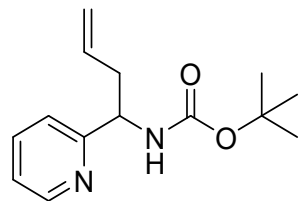

8.4897  
8.4779  
7.5855  
7.5825  
7.5665  
7.5638  
7.5475  
7.5447  
7.1592  
7.1398  
7.1121  
7.0997  
7.0938  
7.0813

5.7326  
5.7155  
5.6573  
5.5536  
5.3299  
4.9800  
4.9654  
4.9390  
4.7826  
4.7663  
4.7490  
4.7326  
4.6184

2.5448  
2.5284  
2.5121

1.3634  
1.3123

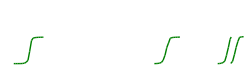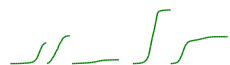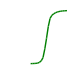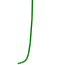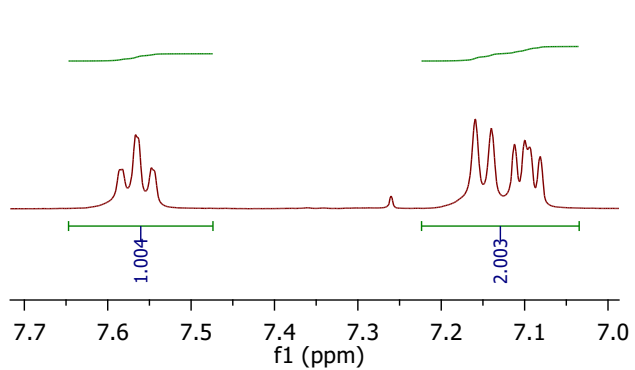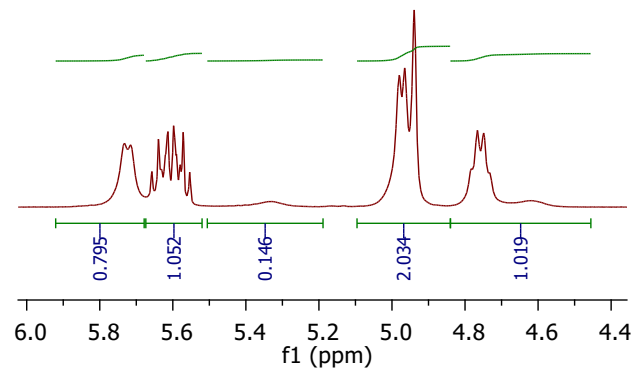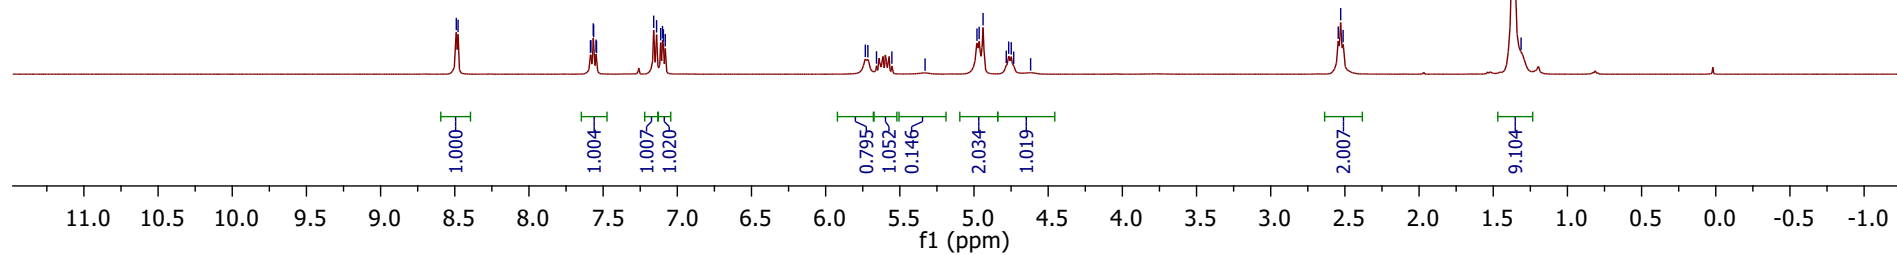

<sup>13</sup>C NMR (CDCl<sub>3</sub>, 101 MHz) **6t**

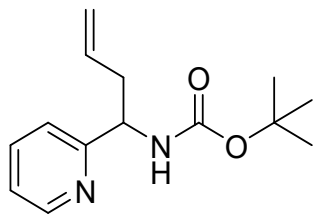

— 160.0758  
— 155.3548  
{ 149.1301  
{ 149.0881  
{ 136.5297  
{ 136.3829  
{ 133.8403  
{ 122.2013  
{ 121.8465  
{ 118.2024  
{ 118.0050  
{ 117.8074

— 79.1942

{ 55.0337  
{ 54.8649

{ 40.8928  
{ 40.7816  
{ 40.6656

— 28.3796

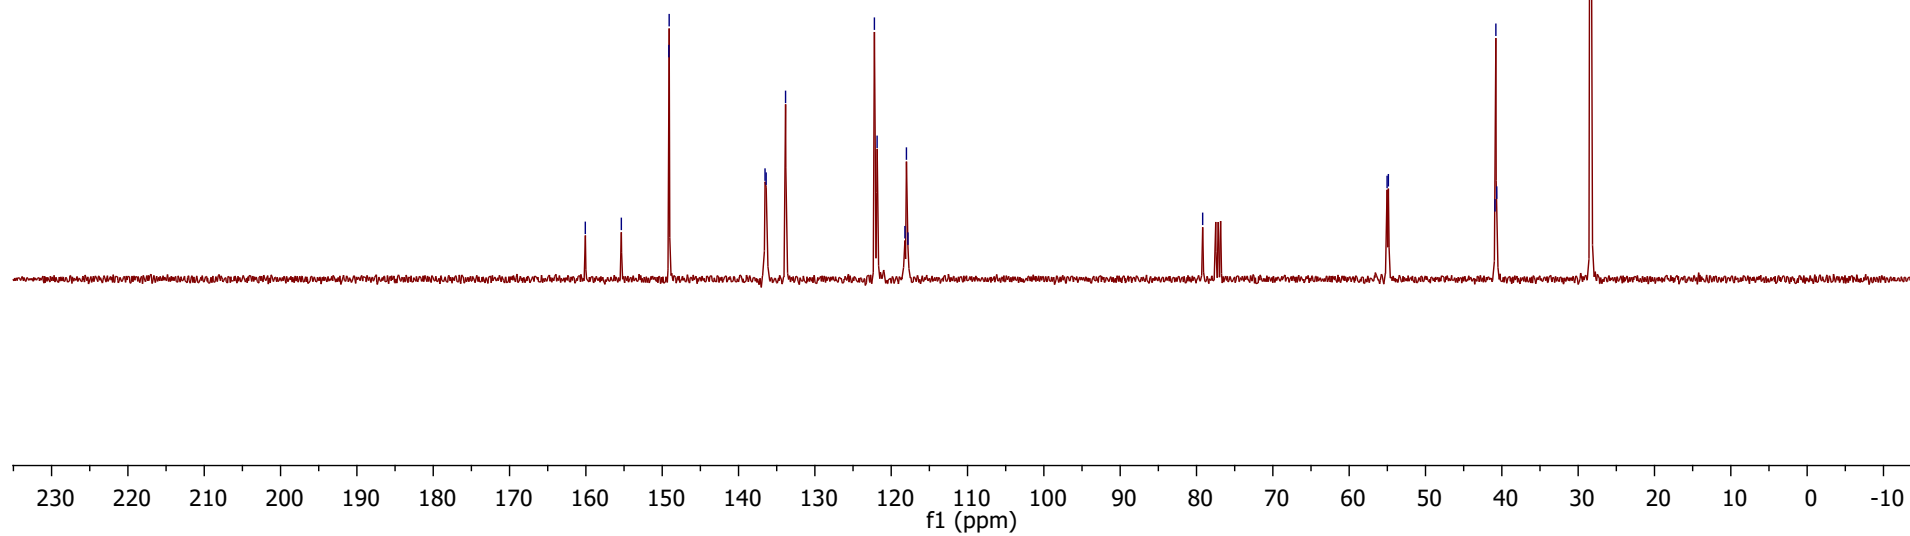

<sup>1</sup>H NMR (CDCl<sub>3</sub>, 400 MHz) **6u**

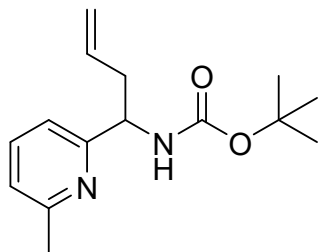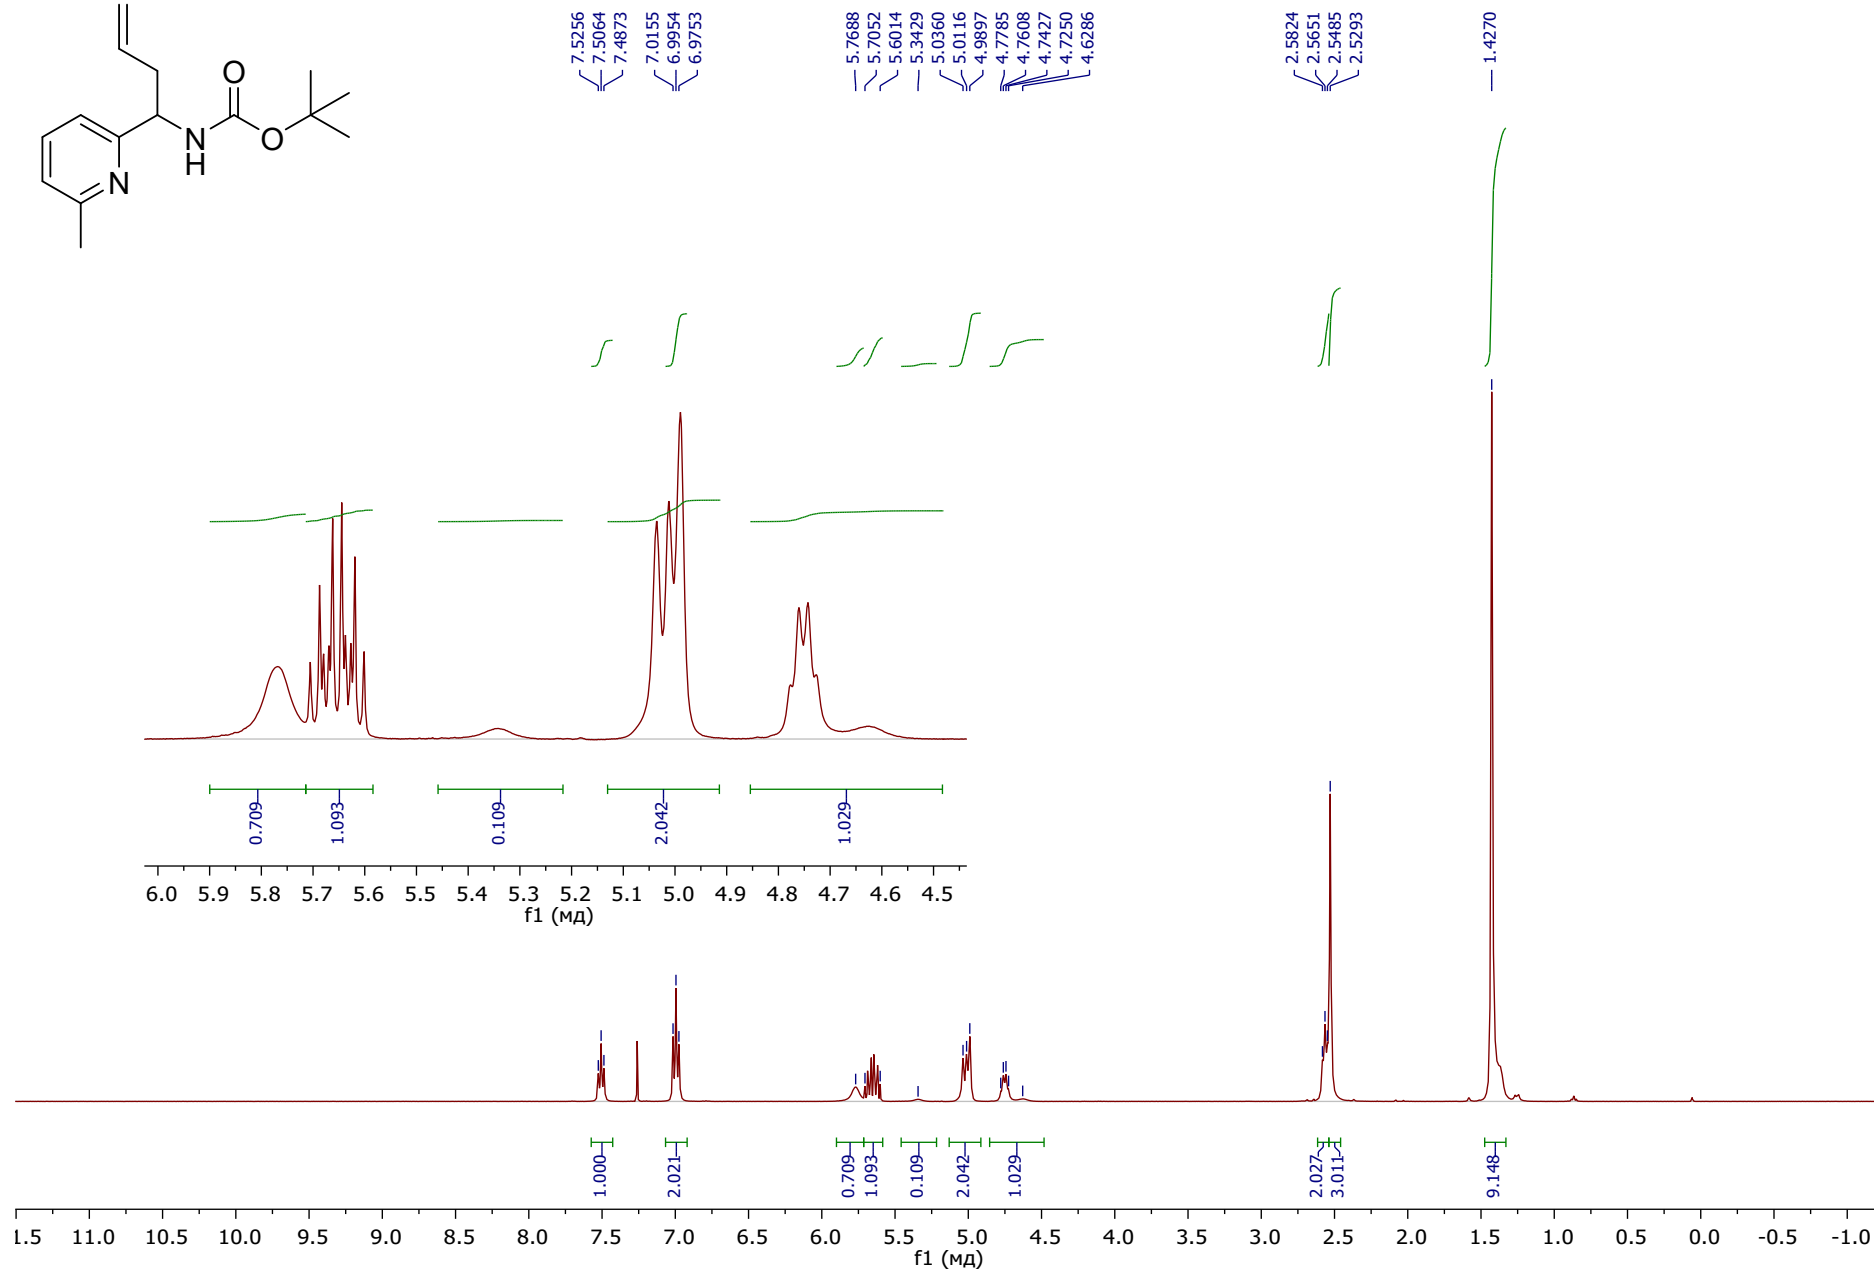

$^{13}\text{C}$  NMR ( $\text{CDCl}_3$ , 101 MHz) **6u**

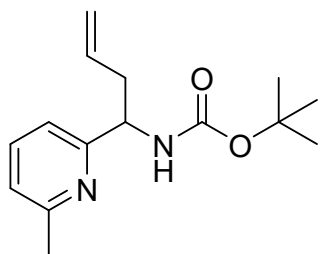

159.1873  
157.9616  
155.4481

136.8648  
134.1642

121.9218  
118.8375  
117.9479

79.2910

54.9786

41.0955

28.5104  
24.4053

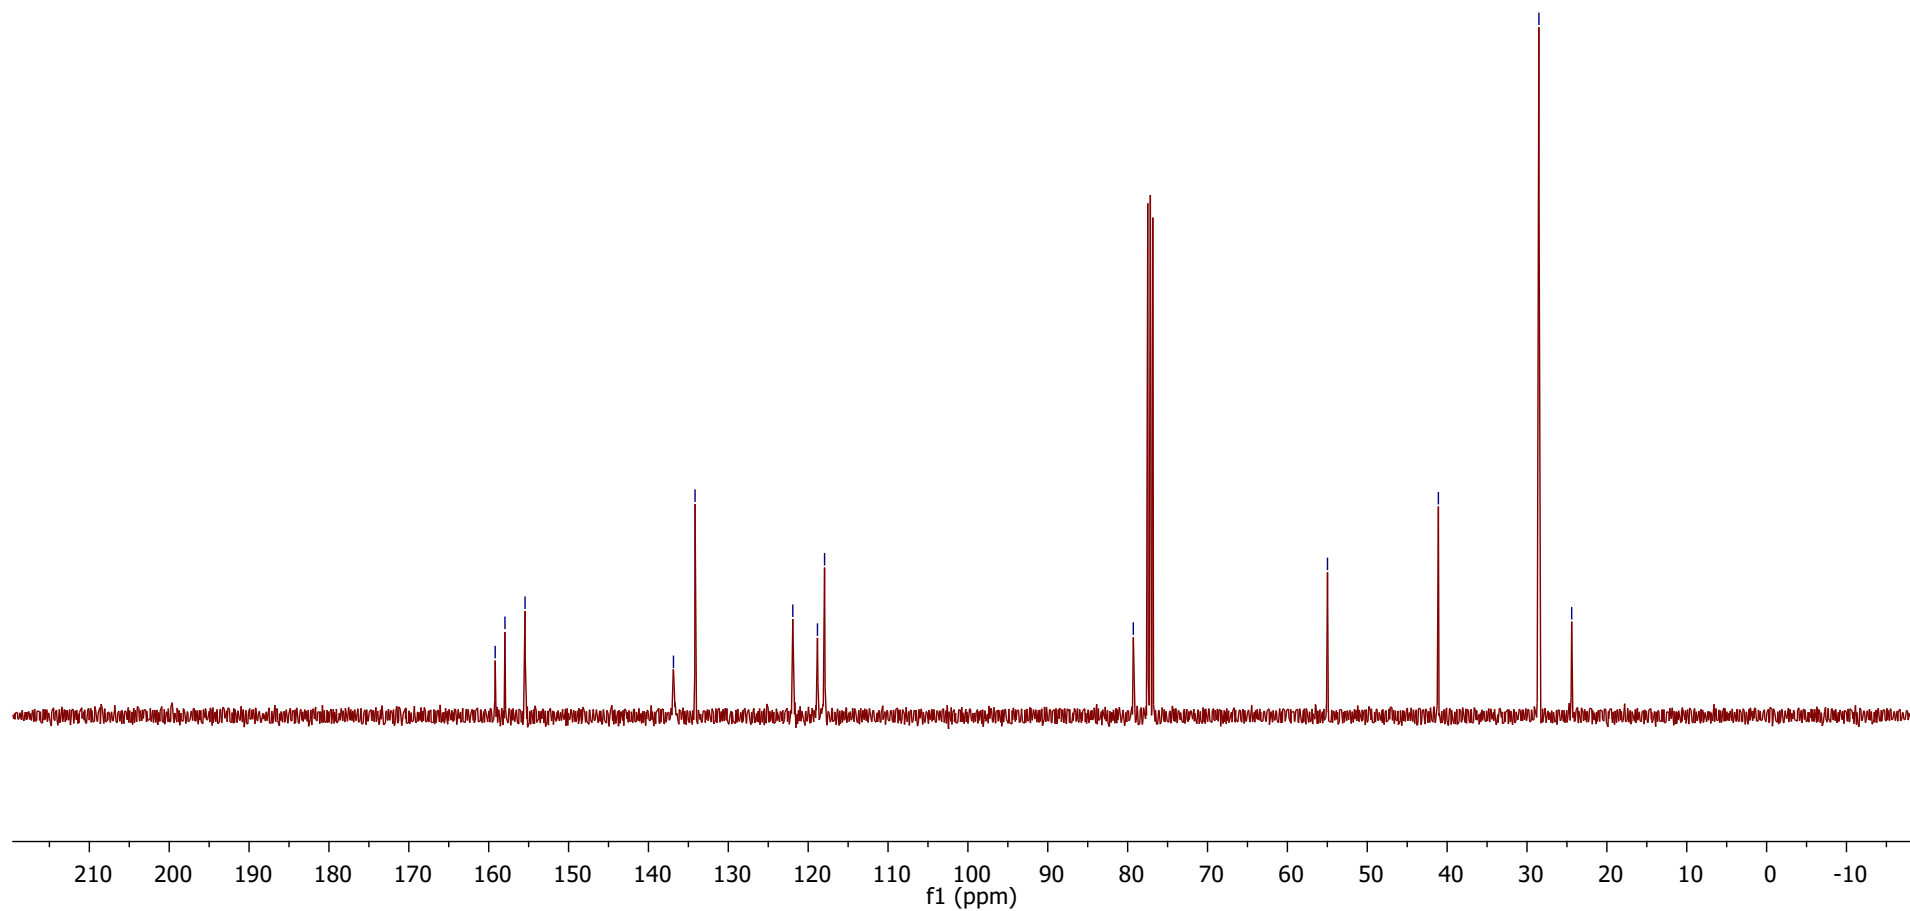

<sup>1</sup>H NMR (CDCl<sub>3</sub>, 400 MHz) **6v**

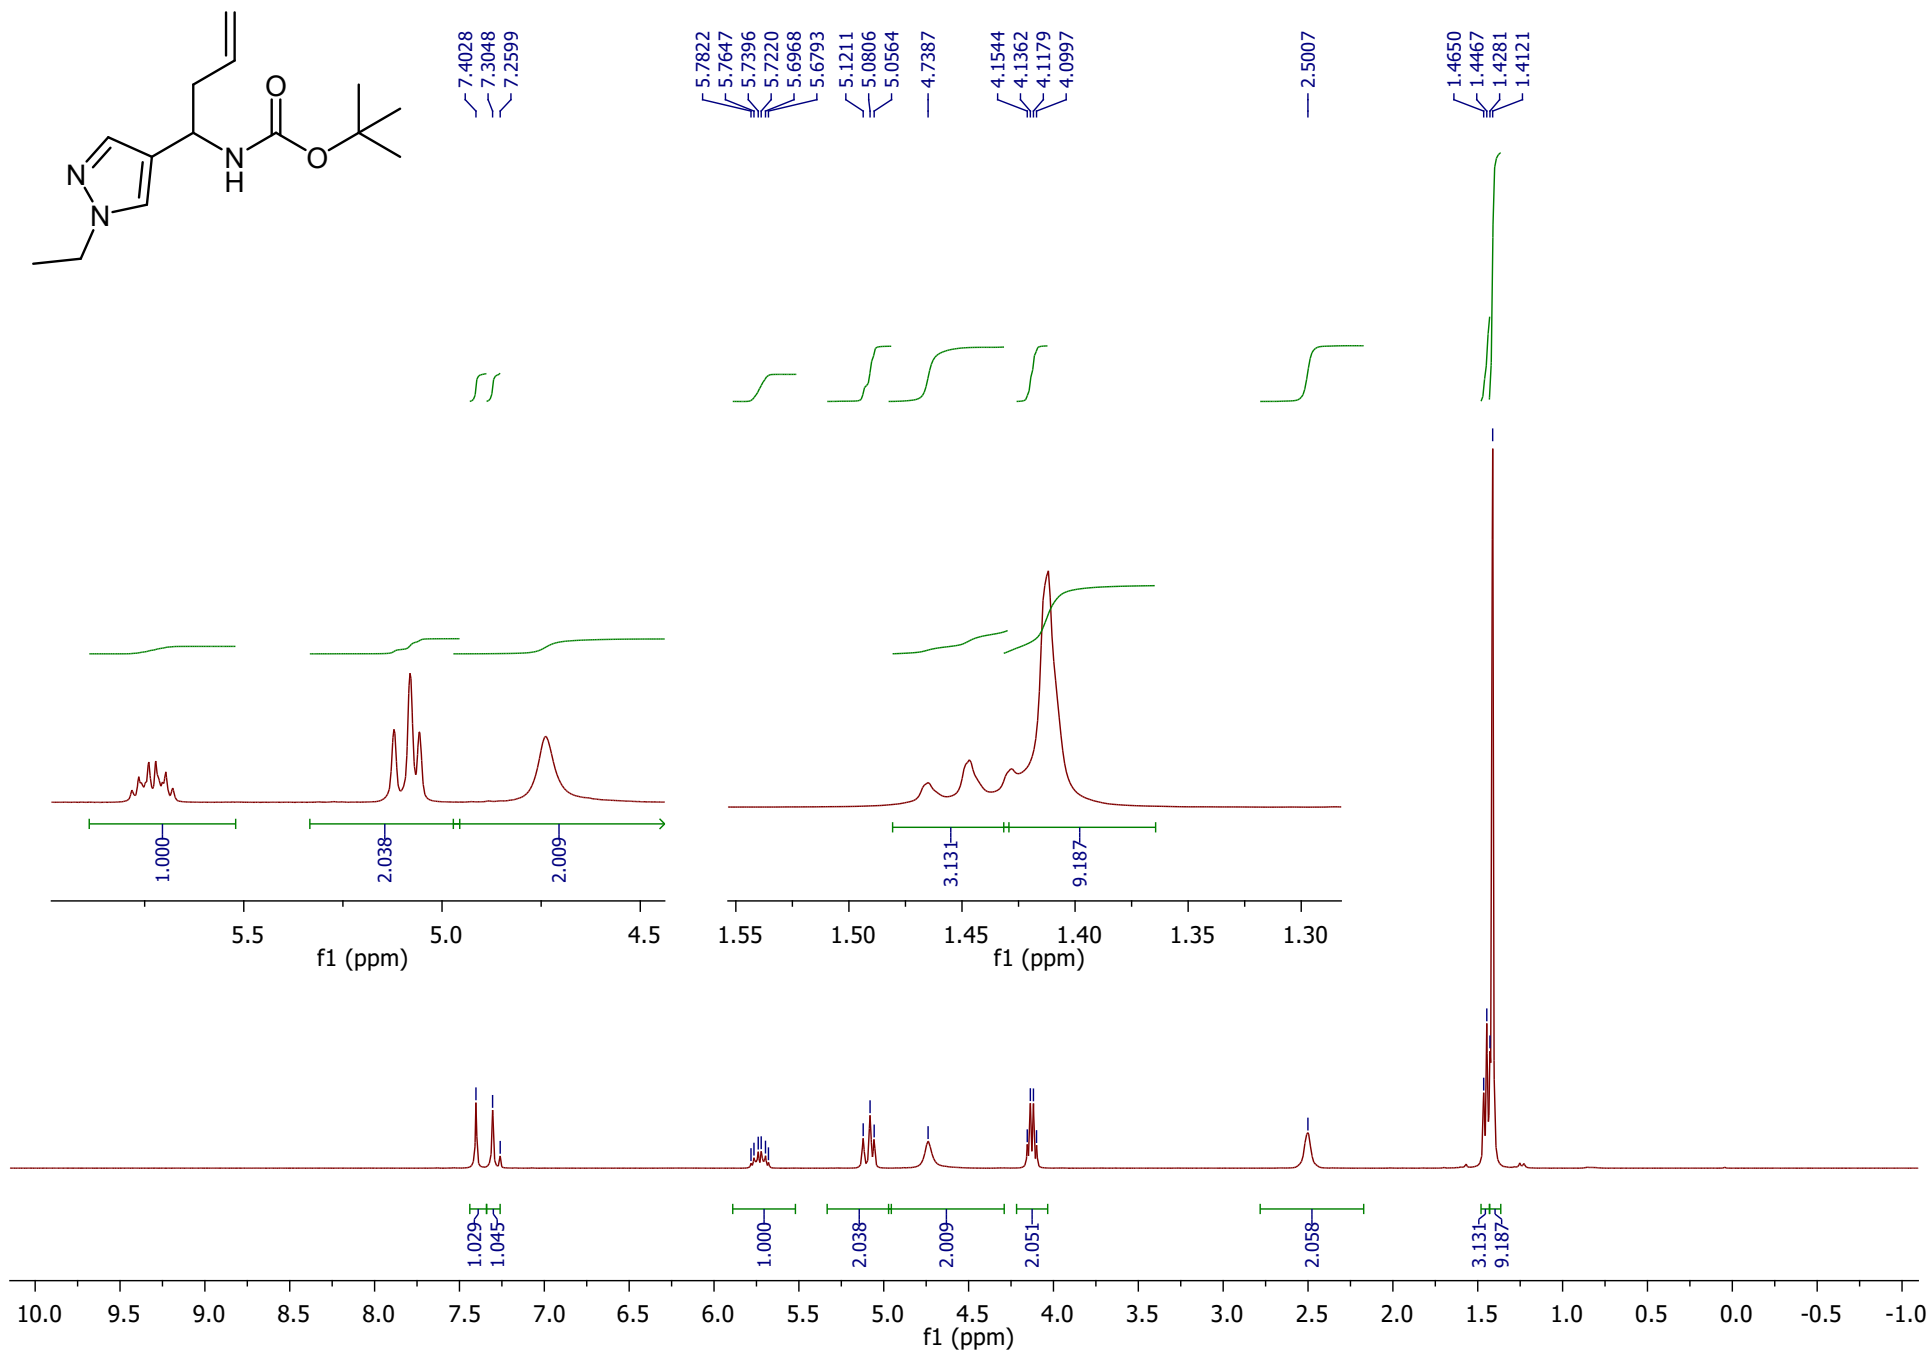

<sup>1</sup>H NMR (CDCl<sub>3</sub>, 400 MHz) **6w**

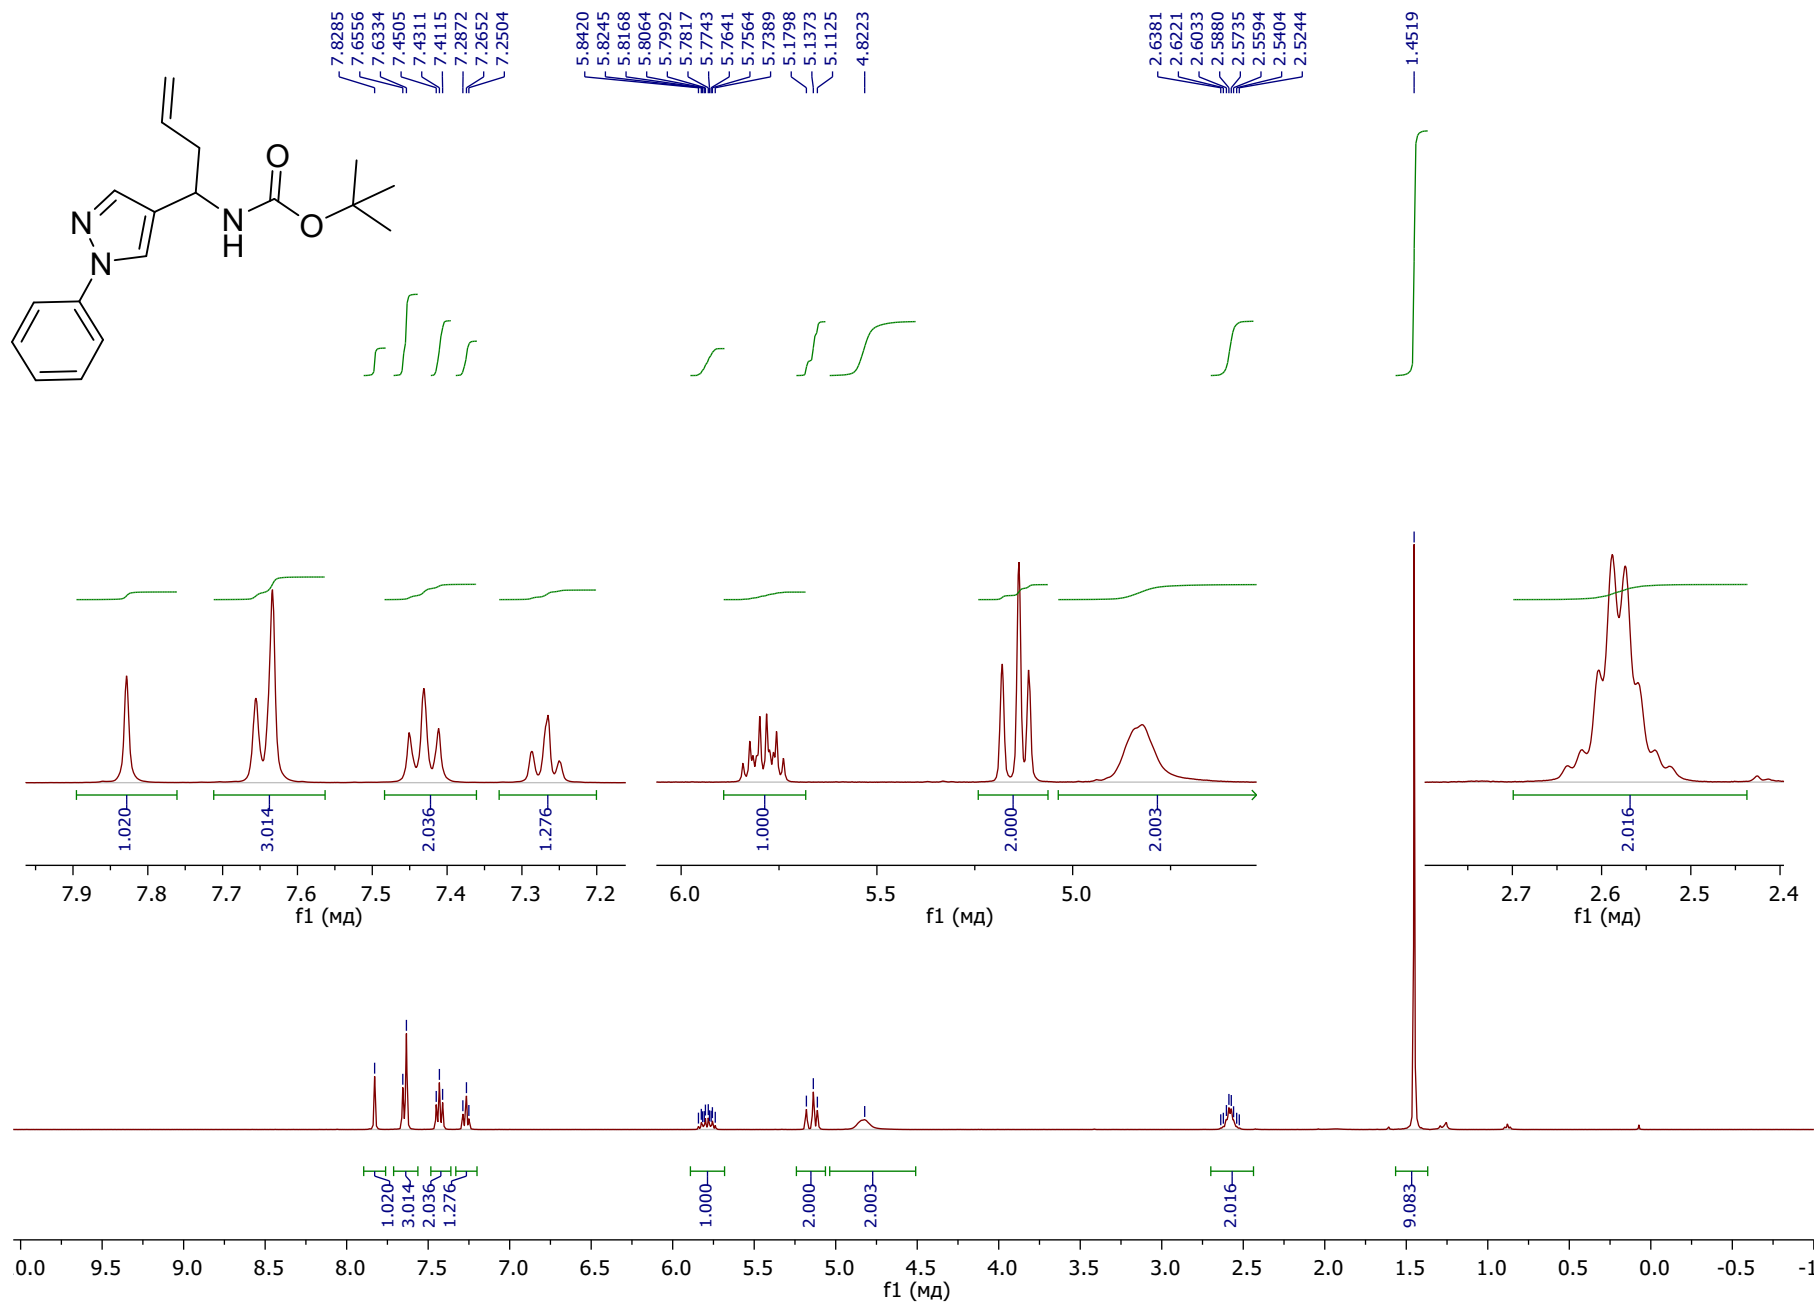

$^1\text{H}$  NMR ( $\text{CDCl}_3$ , 400 MHz) 7

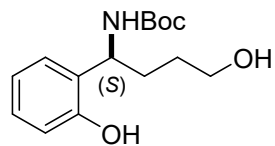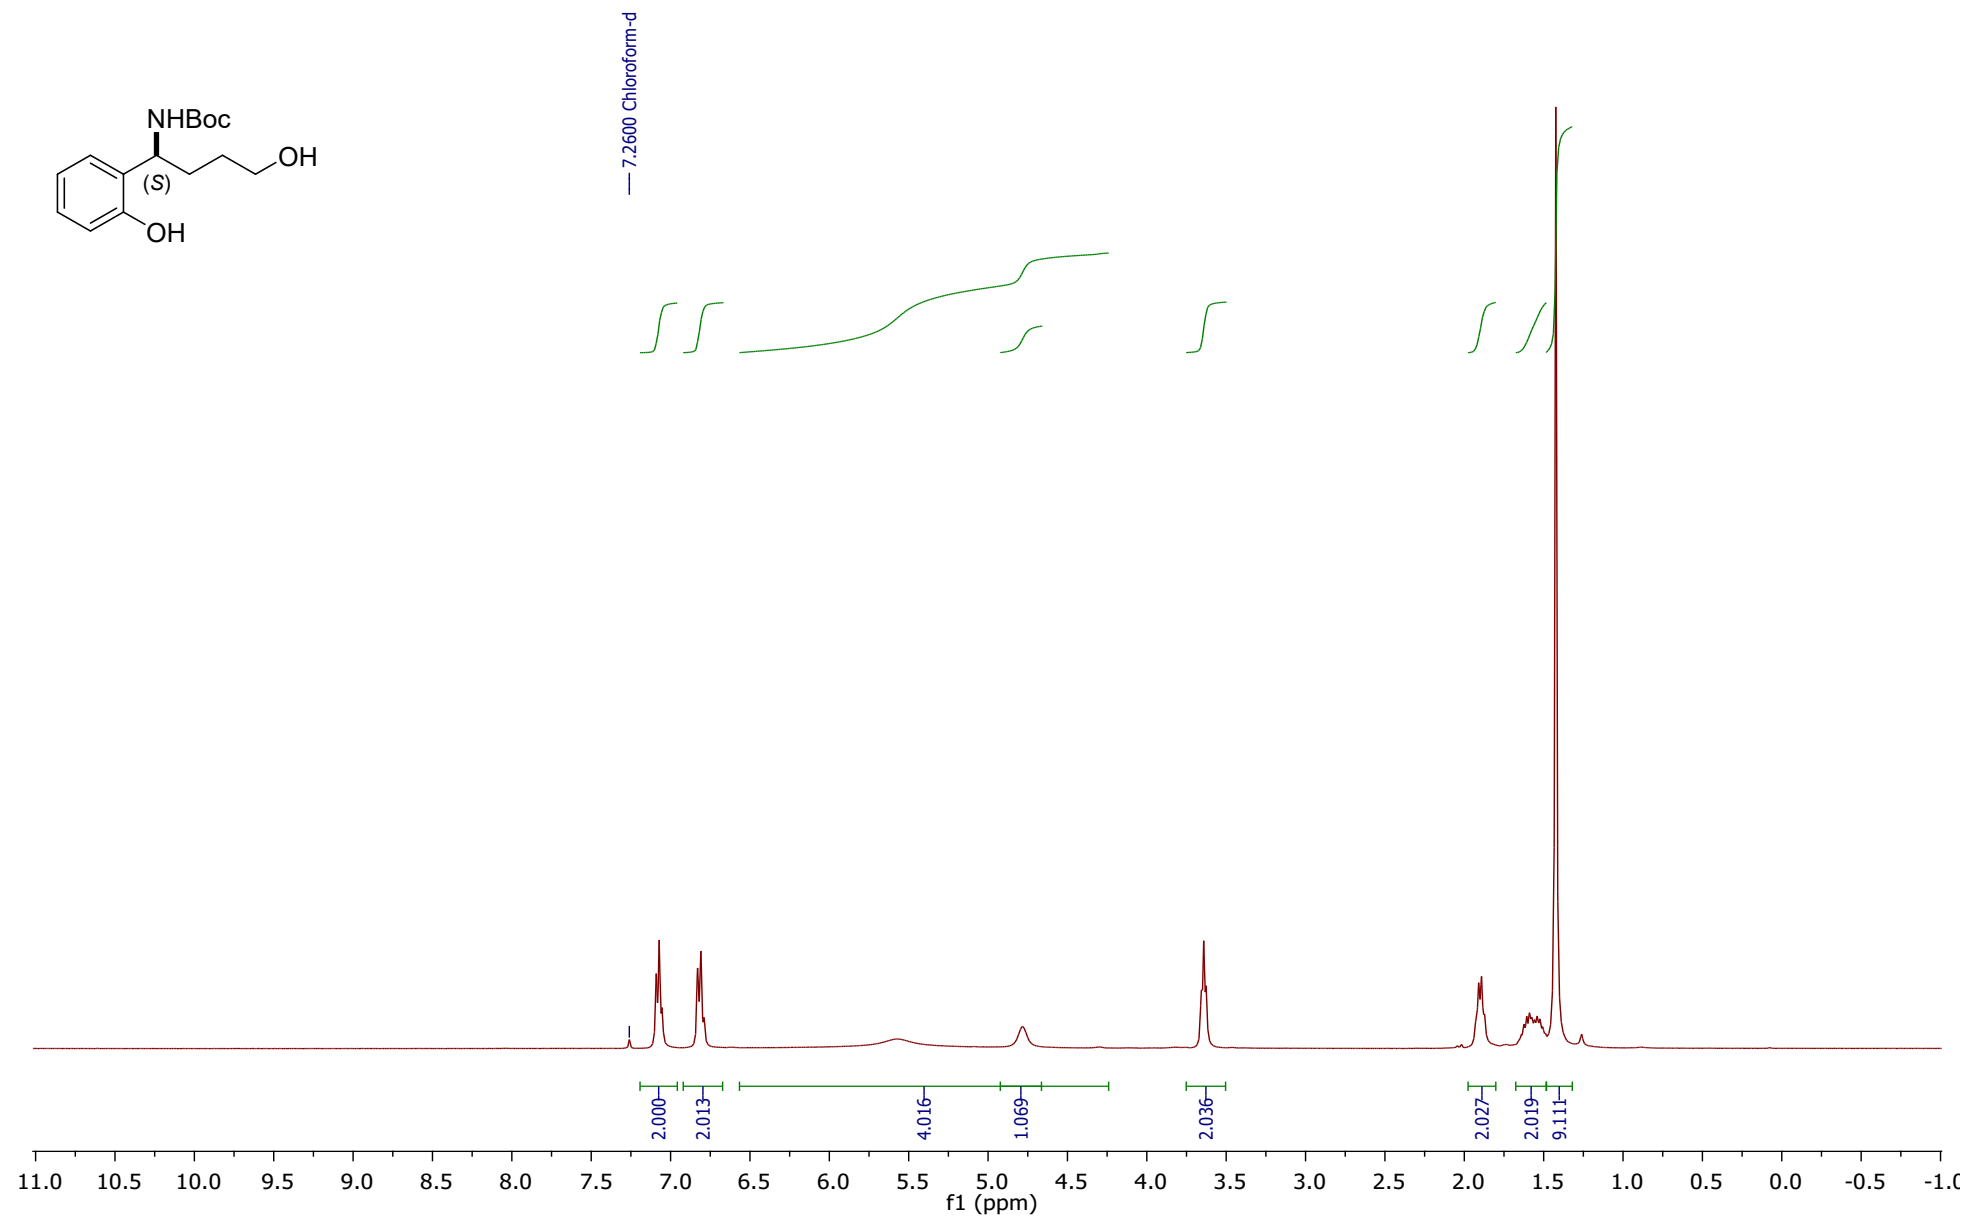

$^1\text{H}$ - $^1\text{H}$  COSY NMR 7

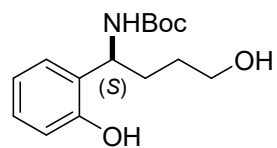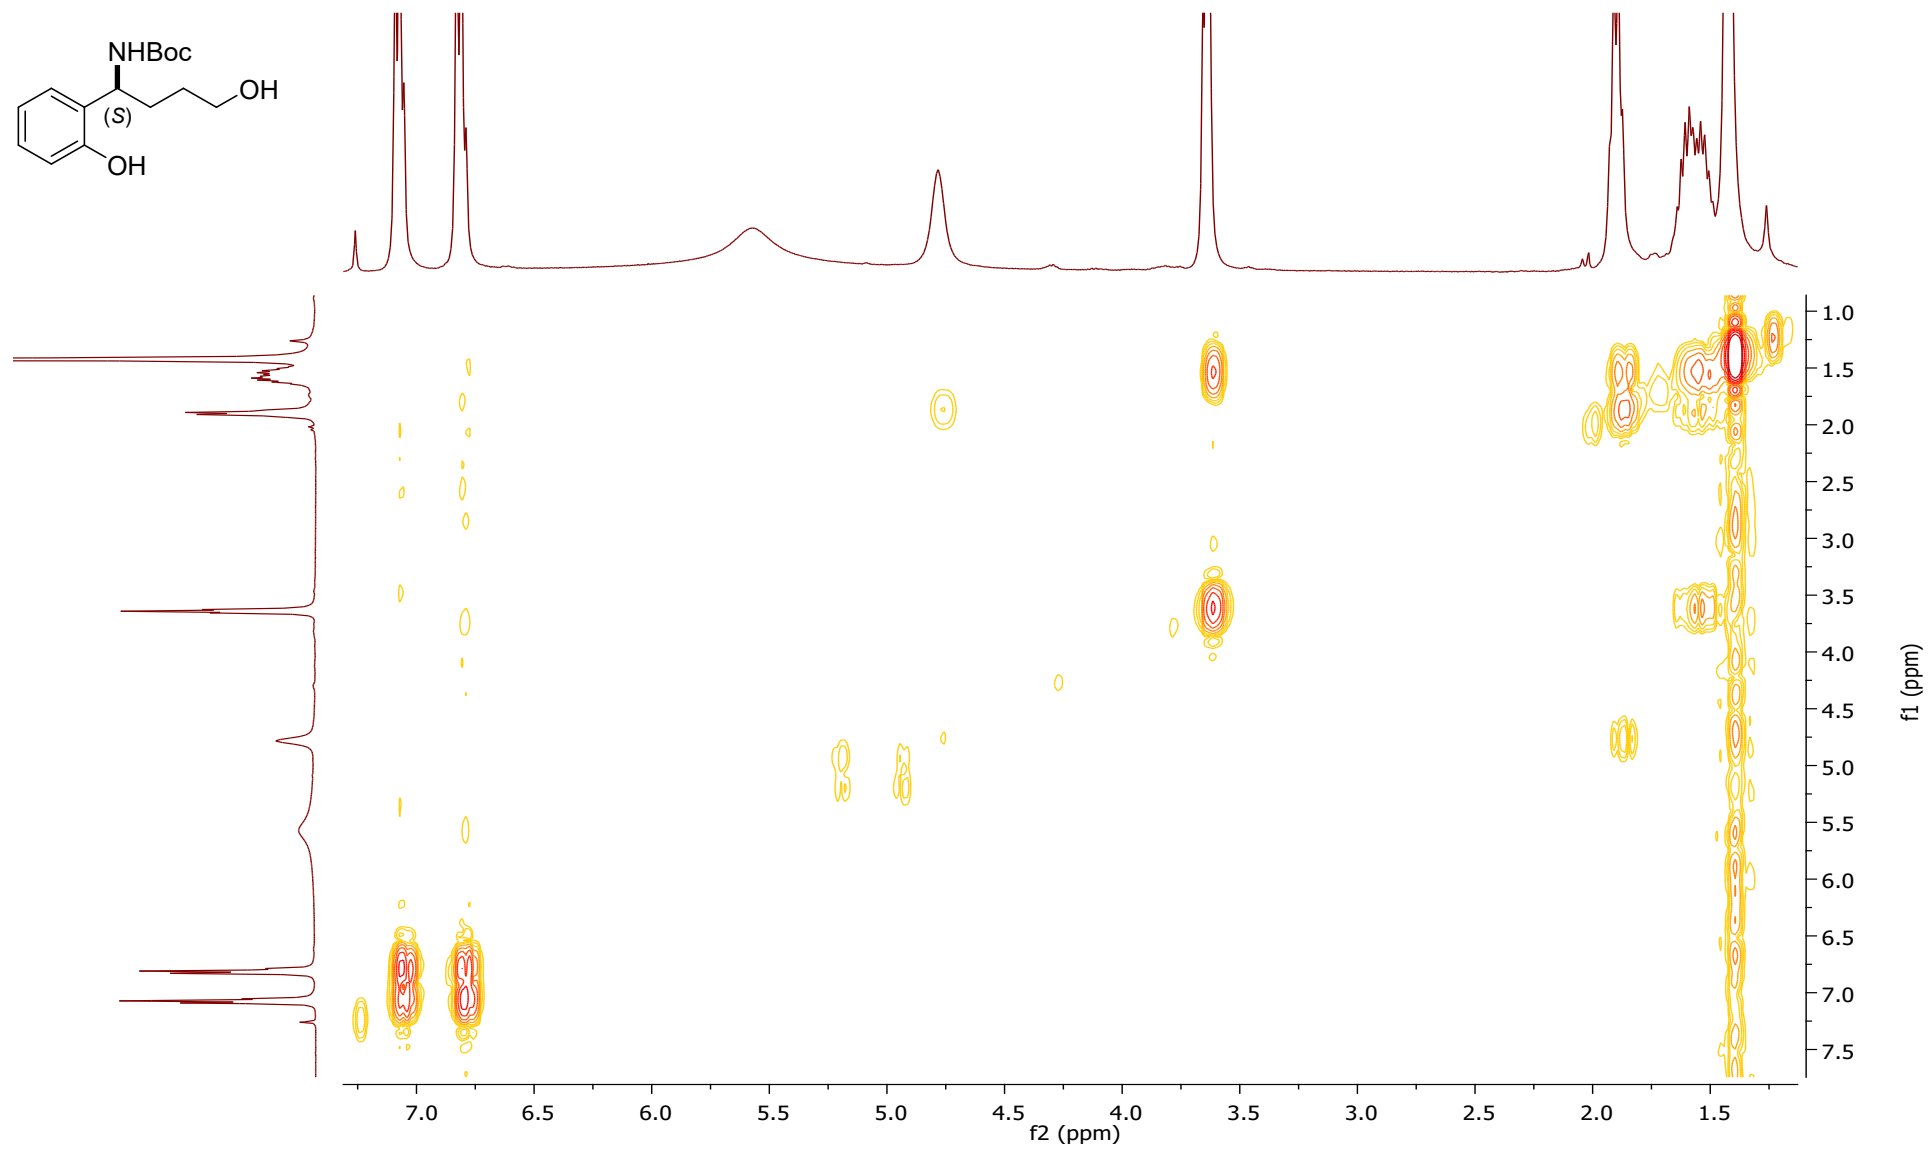



$^{13}\text{C}$  NMR ( $\text{CDCl}_3$ , 101 MHz) 7

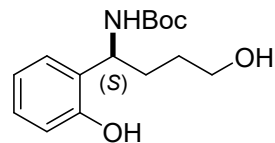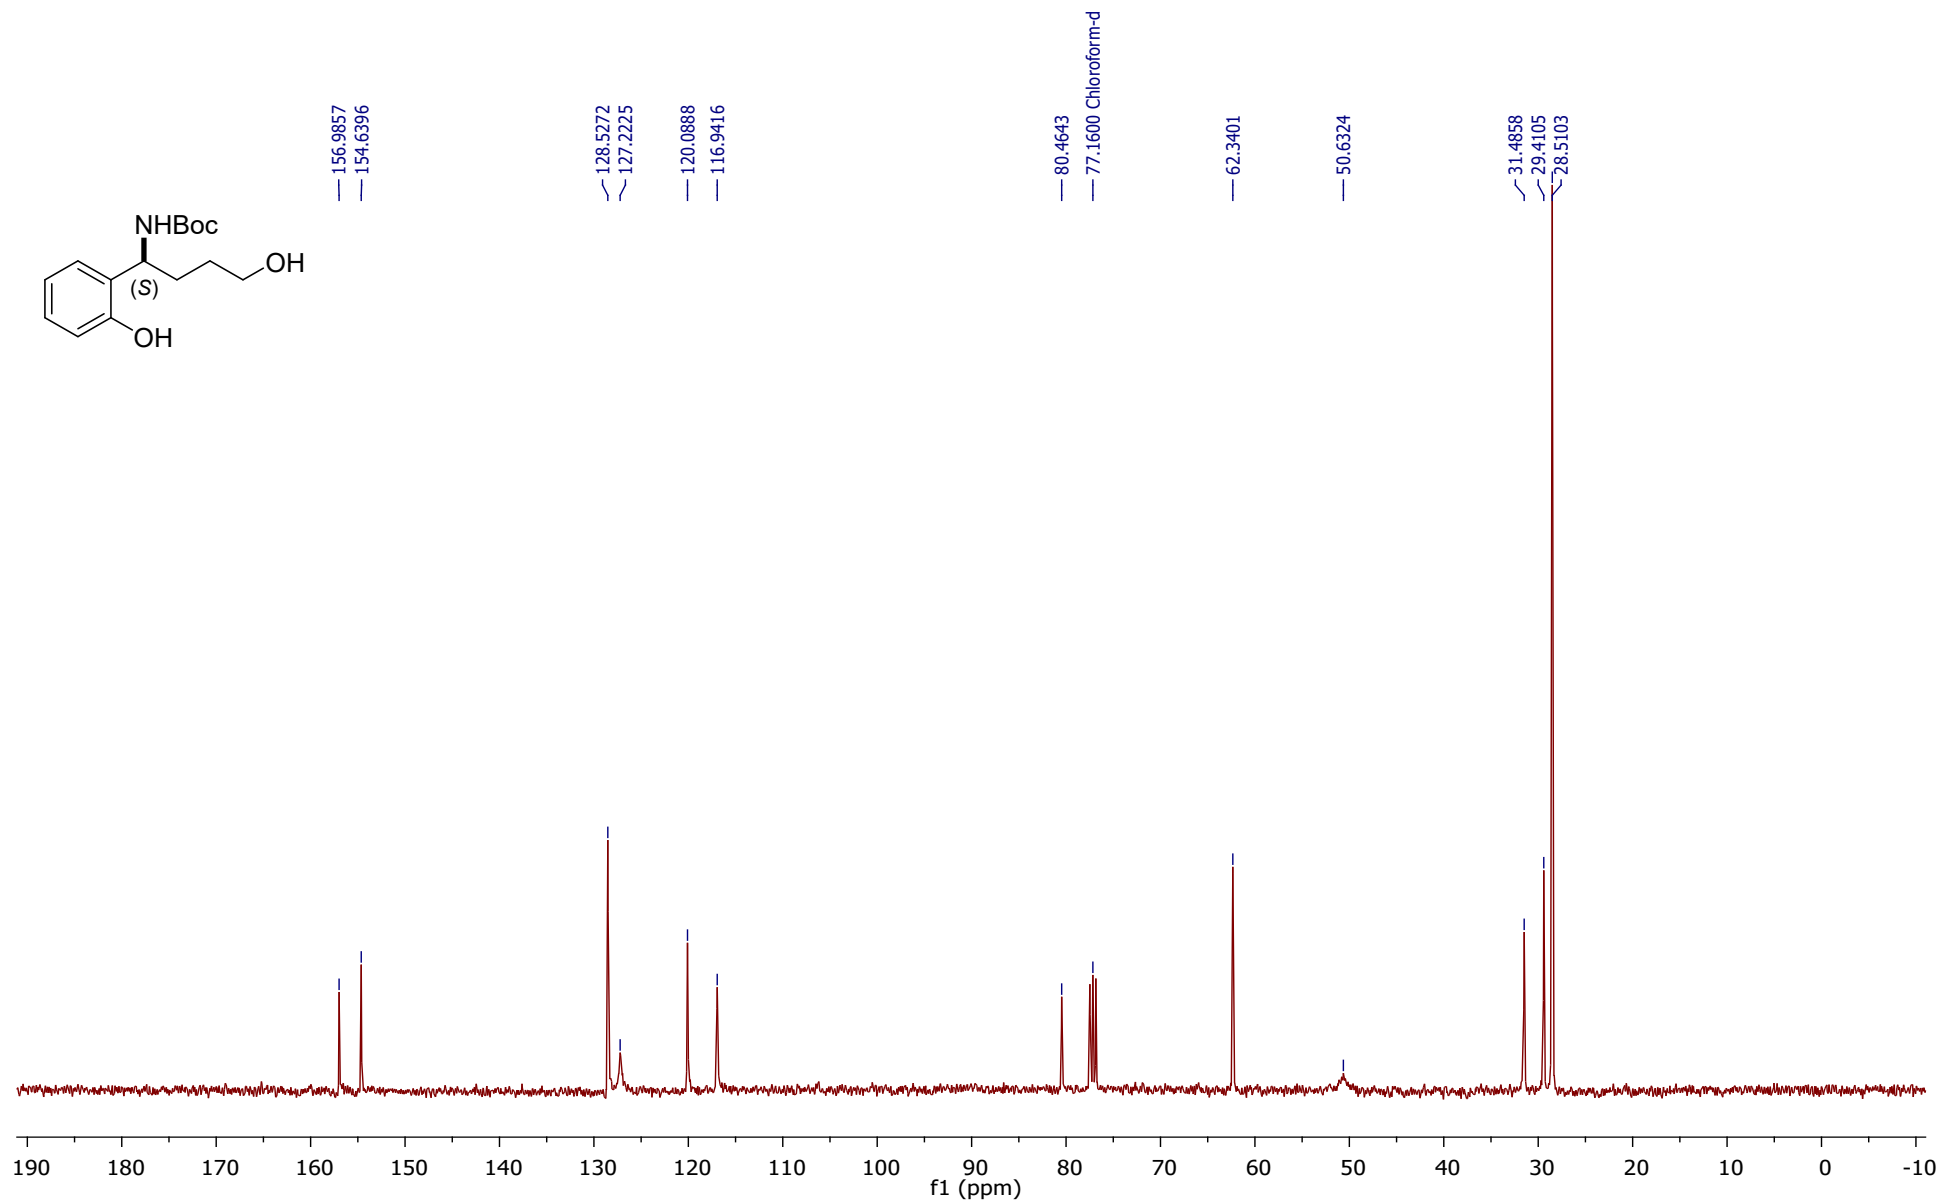

HSQC ( $^{13}\text{C}$ - $^1\text{H}$ ) 7

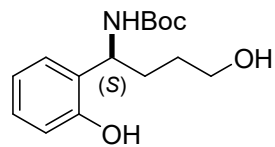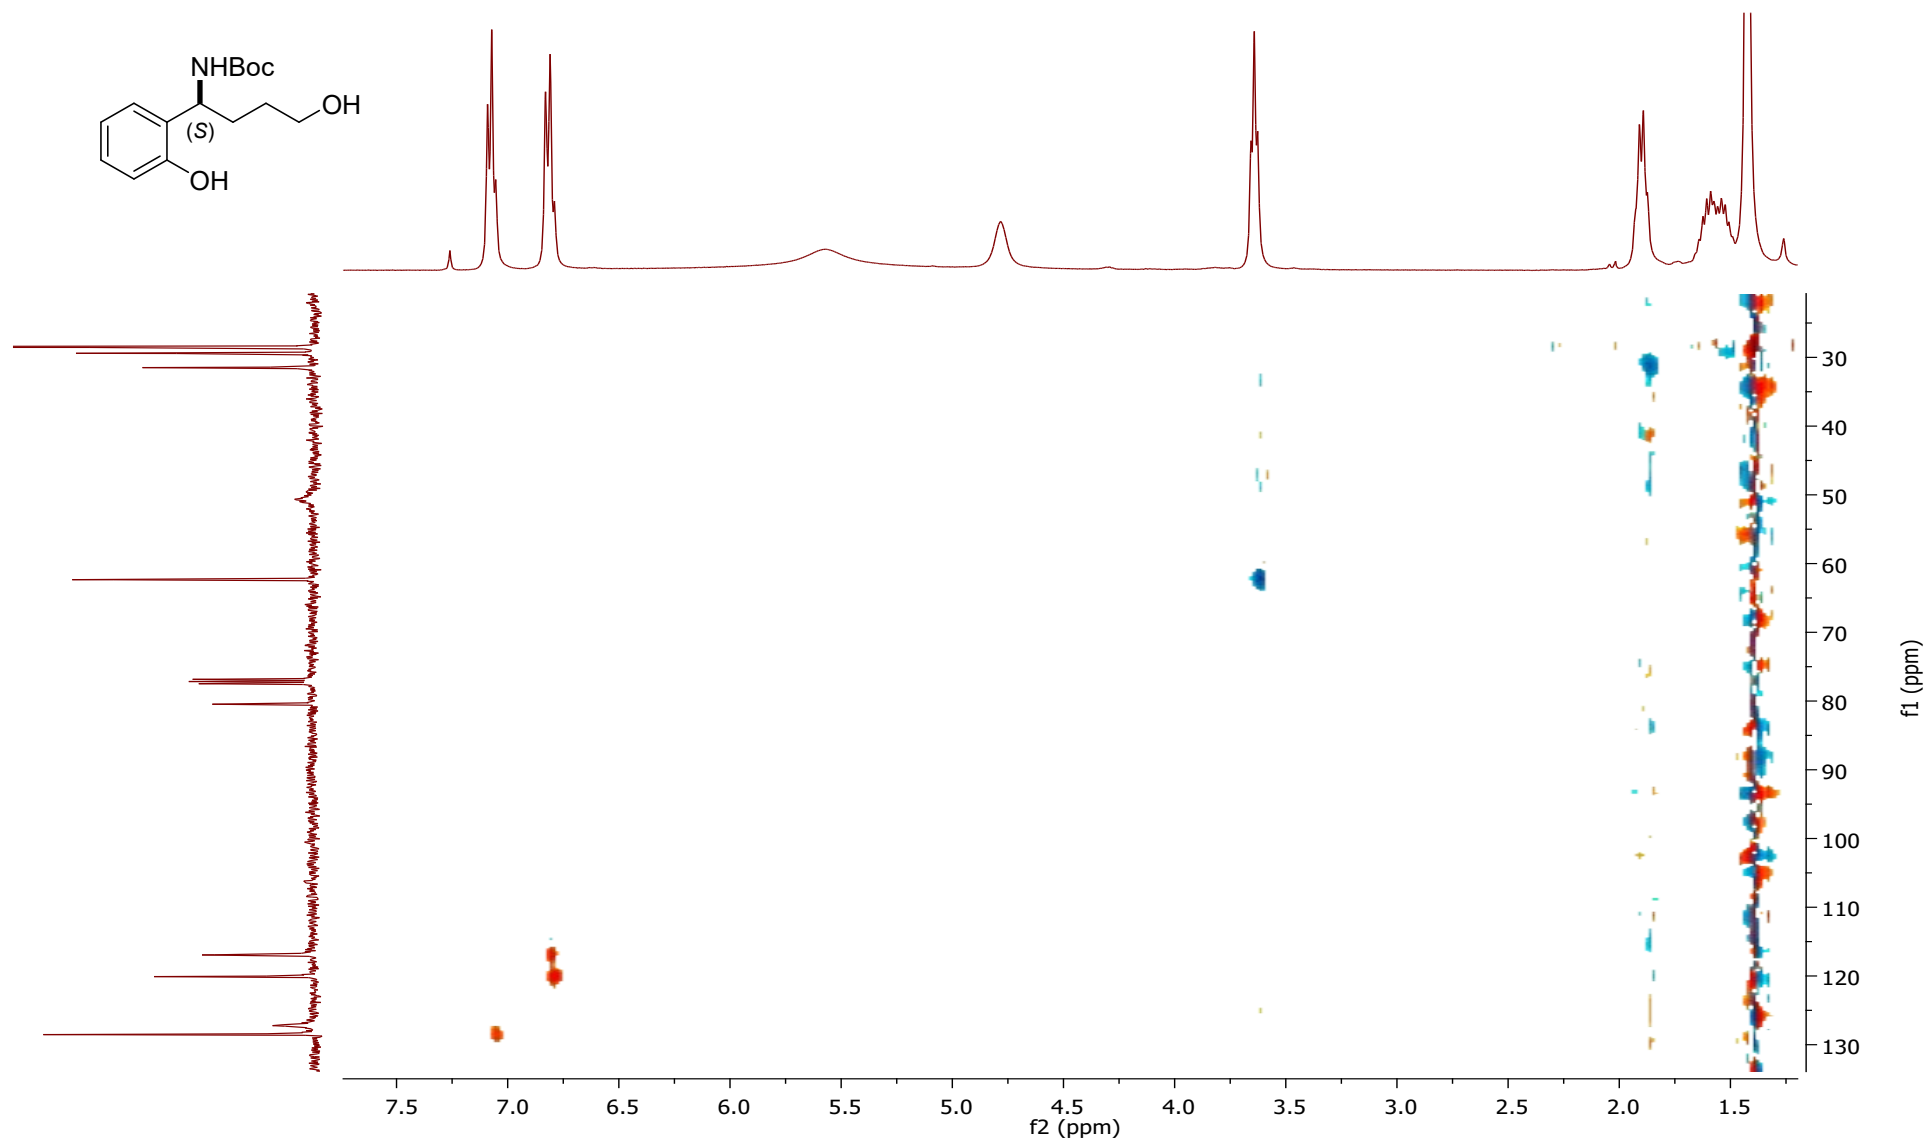

UV absorbance (MeCN,  $1.0 \times 10^{-5} \text{M}$ ) [Cu-1]

$\text{Cu}(\text{PPh}_3)_3\text{F} \cdot 2\text{EtOH}$

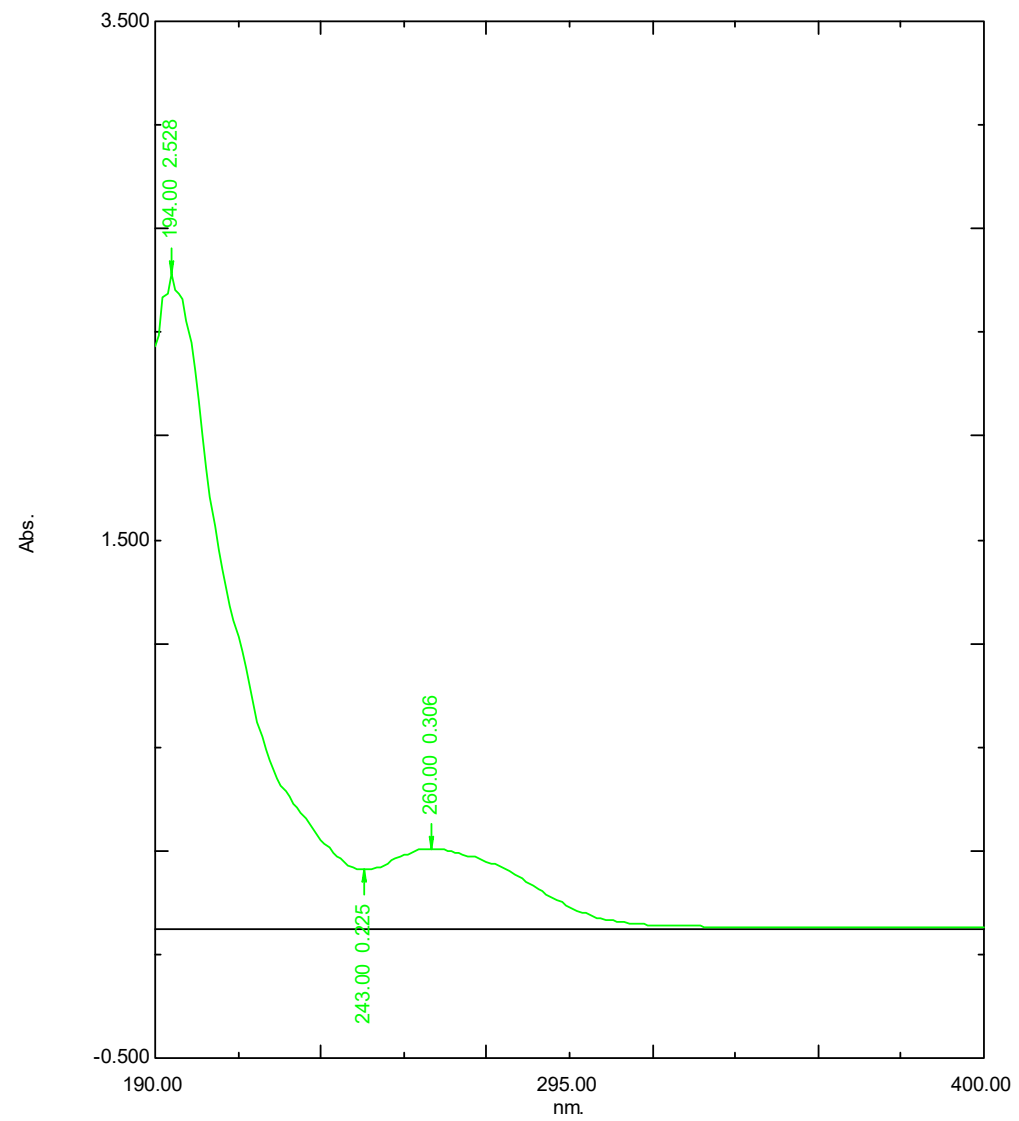

UV absorbance (MeCN,  $1.0 \times 10^{-5} \text{M}$ ) [Cu-2]

$(\text{PPh}_3)_2\text{Cu}(\text{OEt})_2\text{BF}_2$

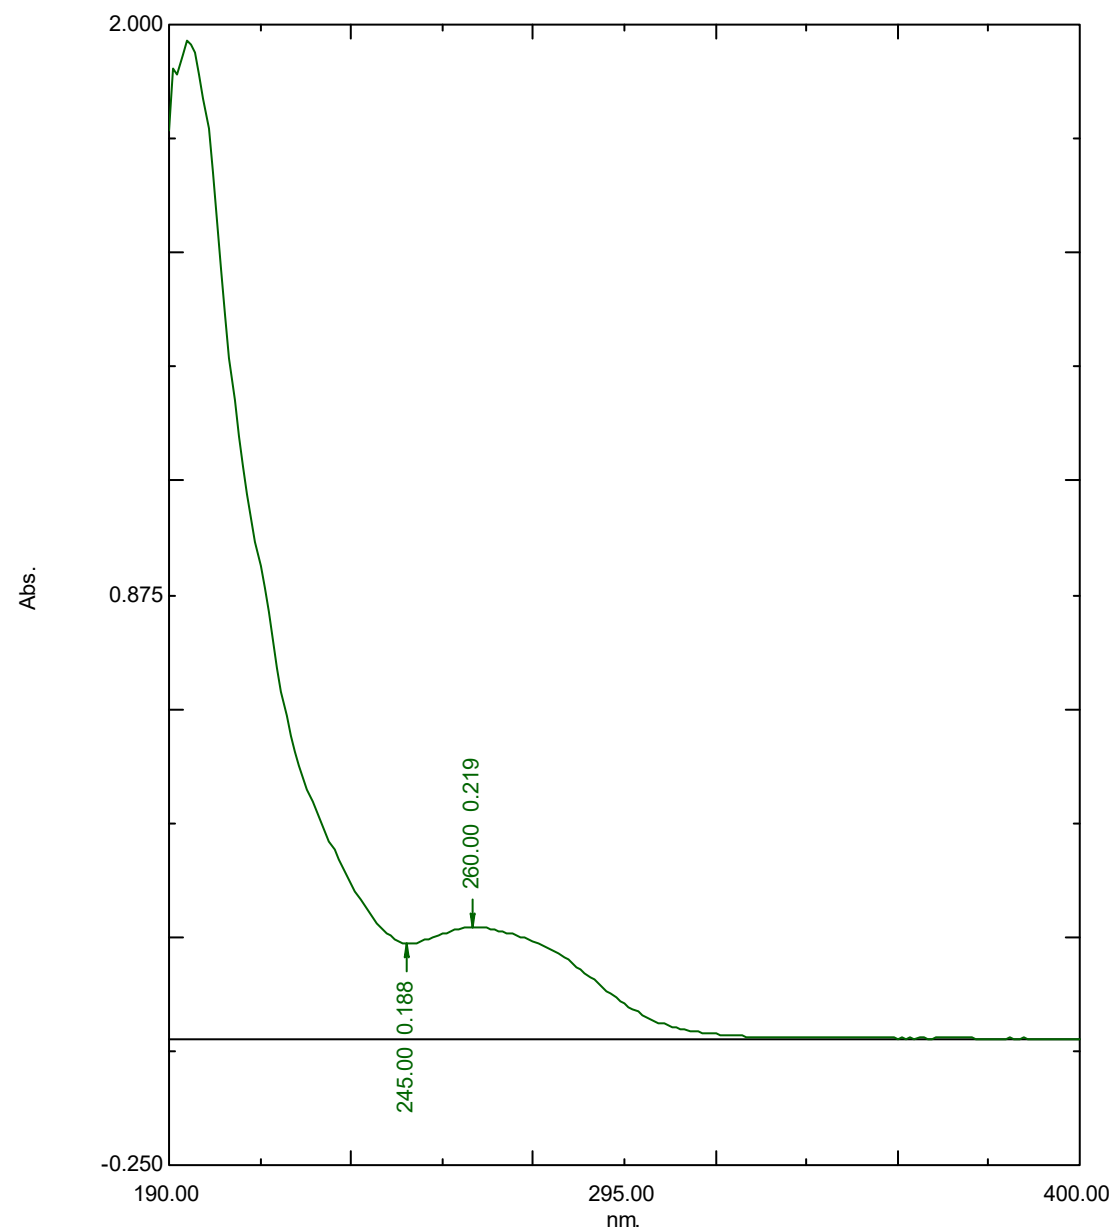

UV absorbance (MeCN,  $1.0 \times 10^{-5} \text{M}$ ) [Cu-3]

$\text{Cu}(\text{PPh}_3)_3\text{Cl} \cdot \text{MeCN}$

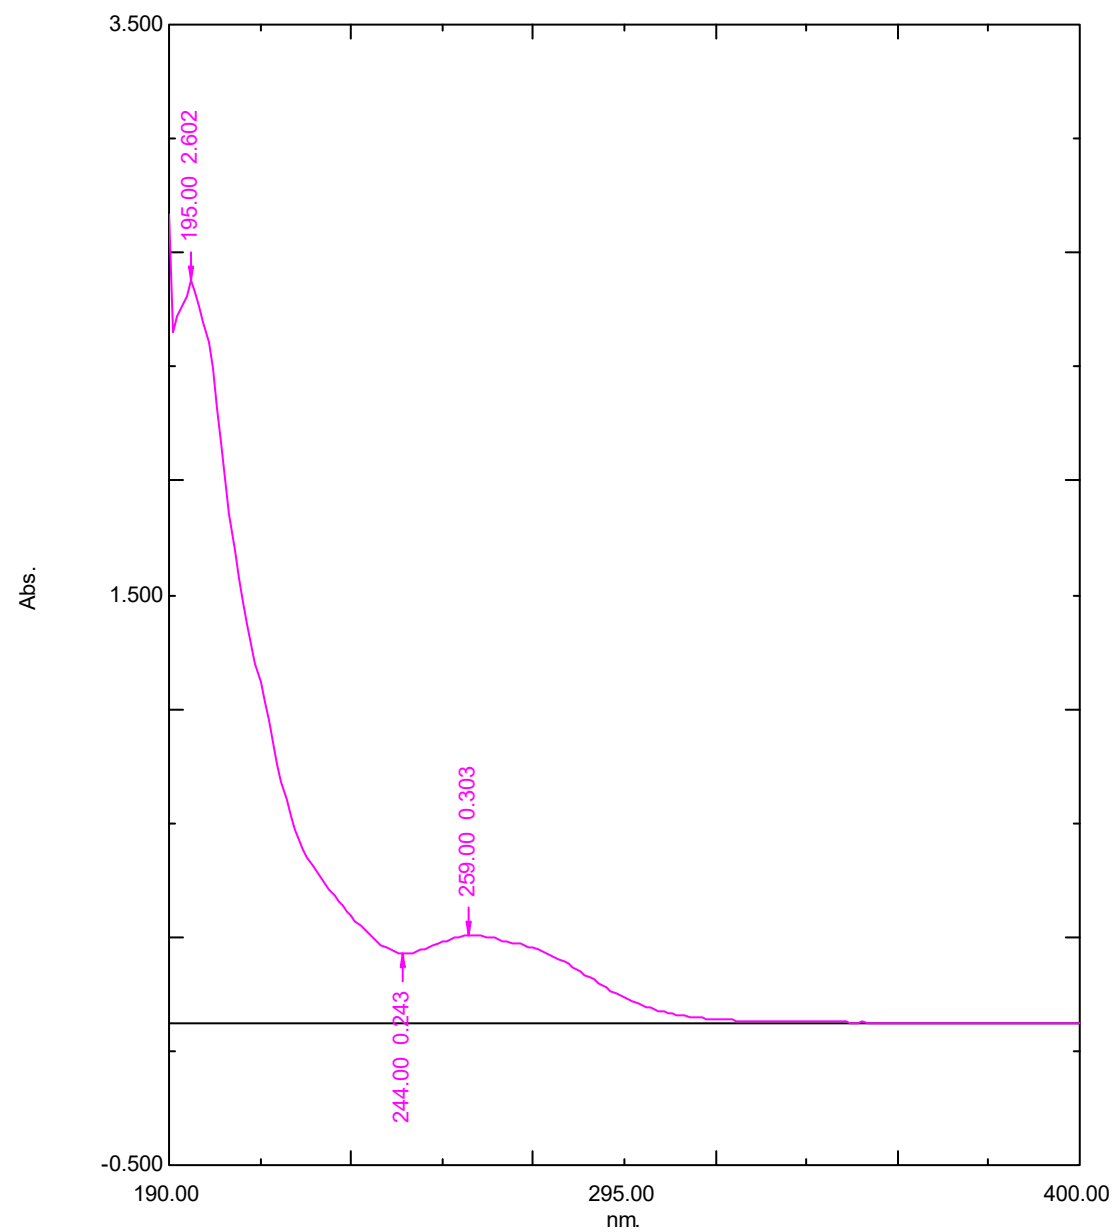

UV absorbance (MeCN,  $1.0 \times 10^{-5} \text{M}$ ) [Cu-4]

Cu(SiMes)Cl

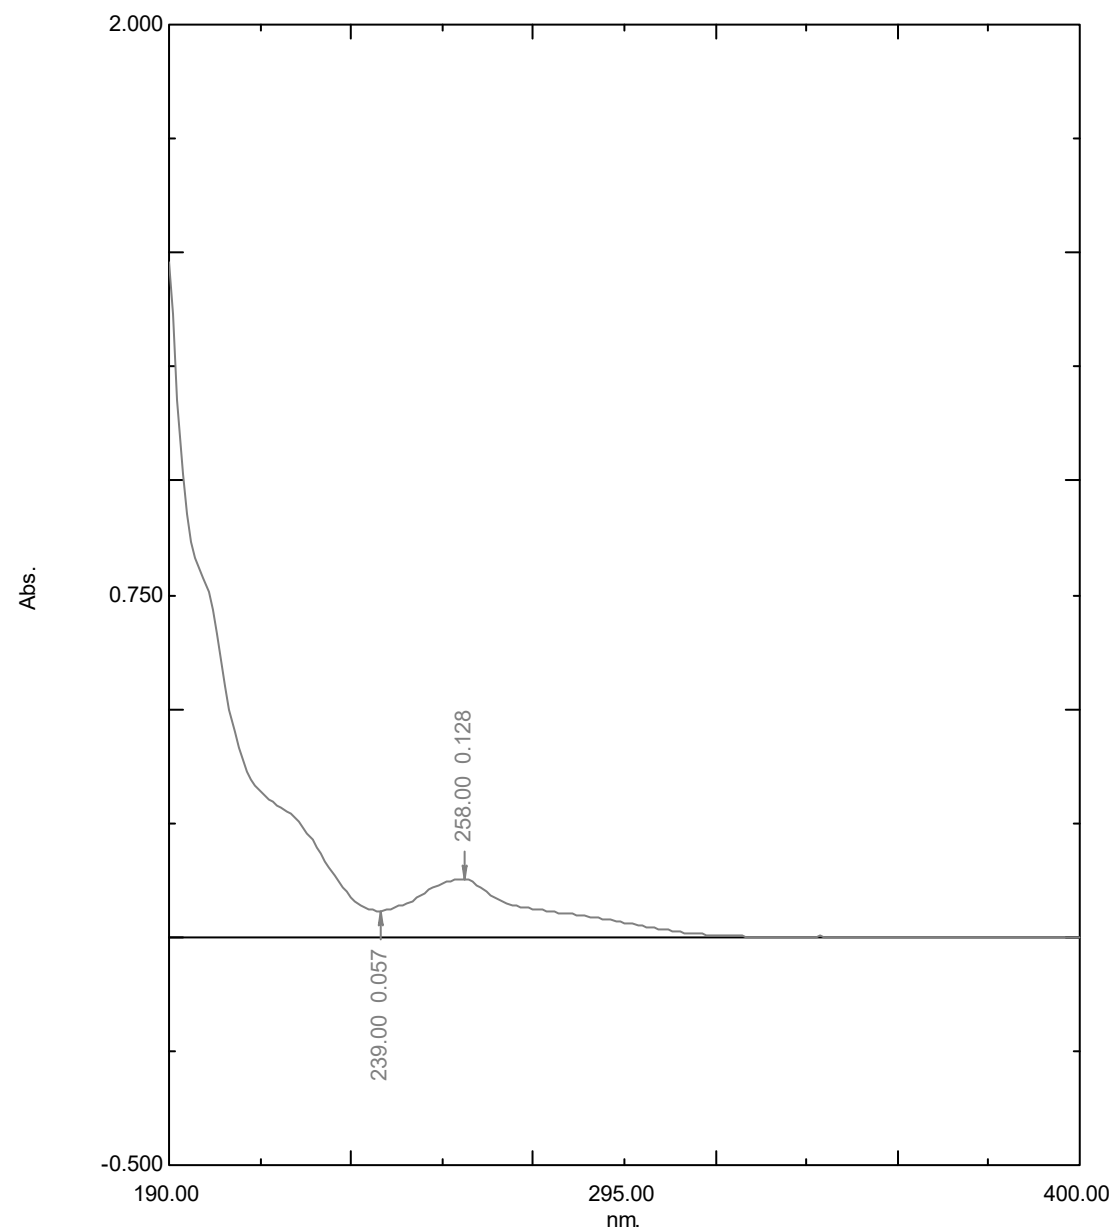

UV absorbance (MeCN,  $2.0 \times 10^{-5} \text{M}$ ) [Cu-5]

$\text{Cu}(\text{dppe})_2\text{BF}_4$

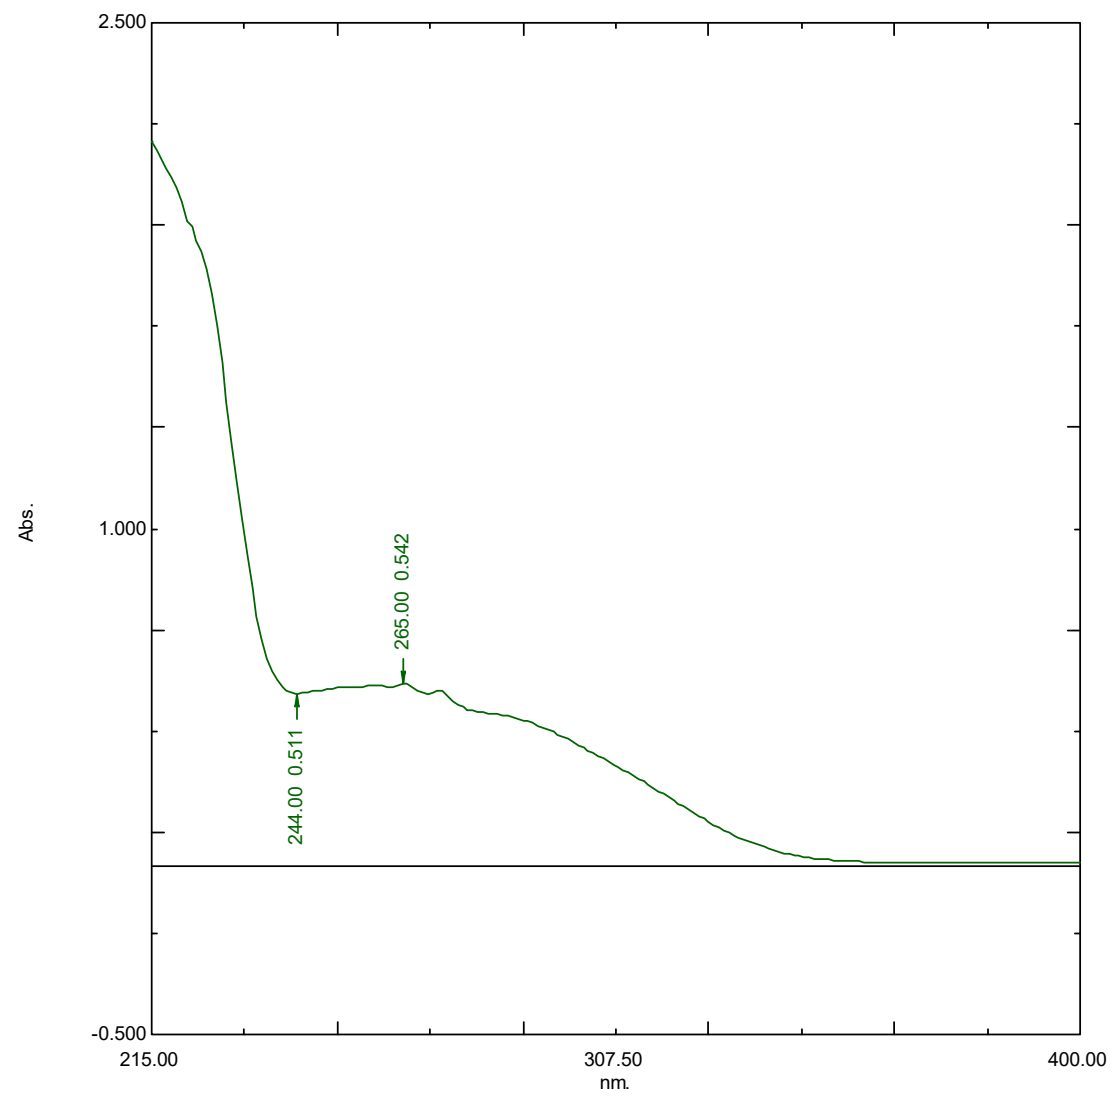

UV absorbance (MeCN,  $0.5 \times 10^{-5} \text{M}$ ) [Cu-6]

[Cu(dppf)Cl]<sub>2</sub>

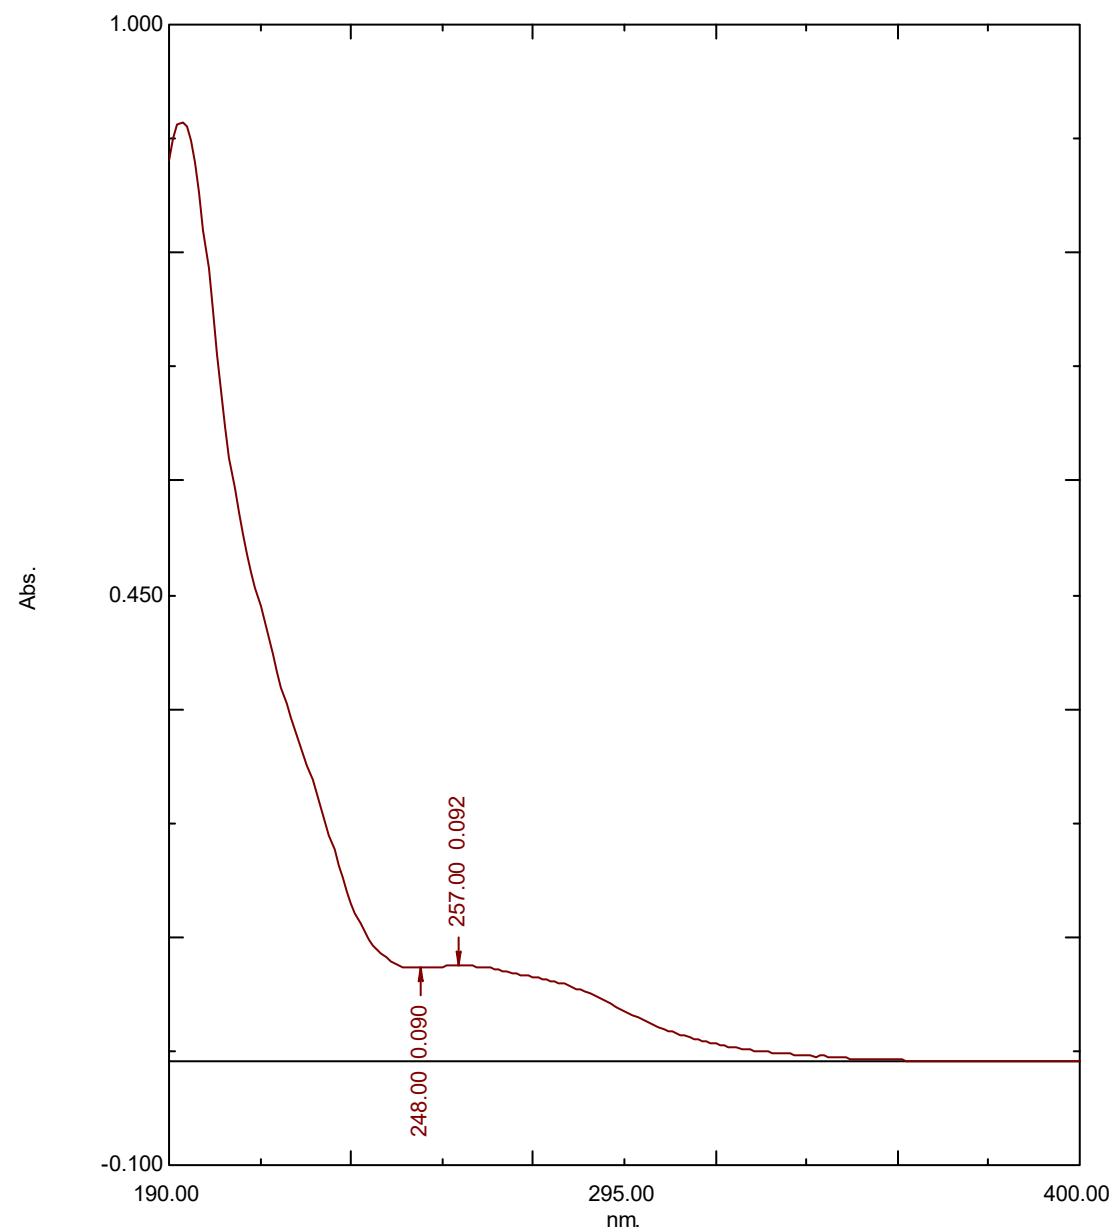



UV absorbance (MeCN,  $1.0 \times 10^{-5} \text{M}$ ) [Cu-7]

$\text{Cu}(\text{oTol}_3\text{P})_3\text{Cl}$

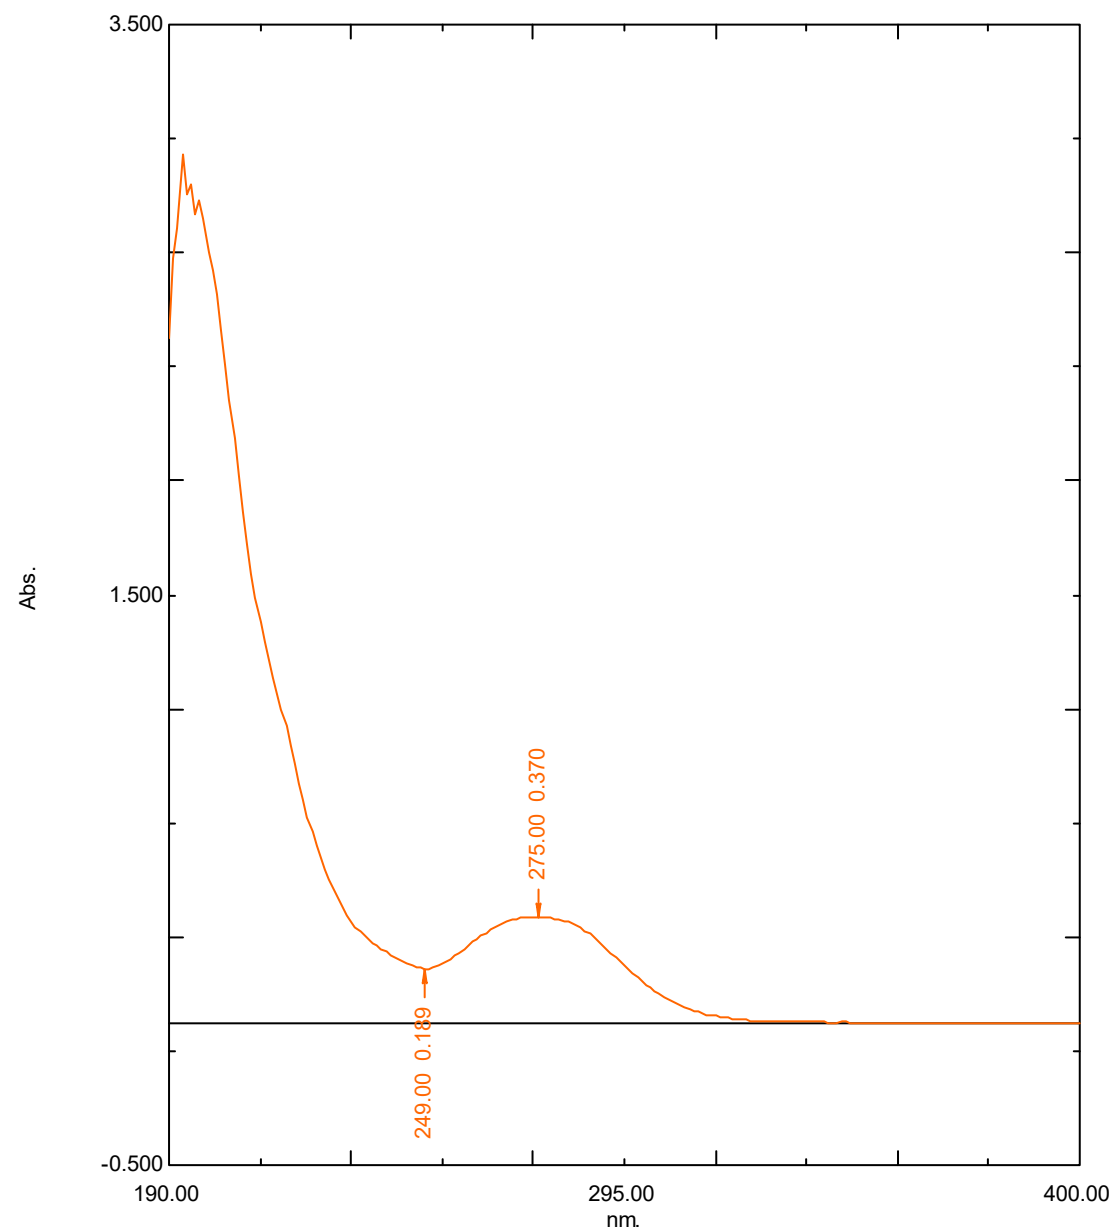

UV absorbance (MeCN,  $1.0 \times 10^{-5} \text{M}$ ) [Cu-8]

$\text{Cu}(\text{Ph}_2\text{MeP})_3\text{Cl}$

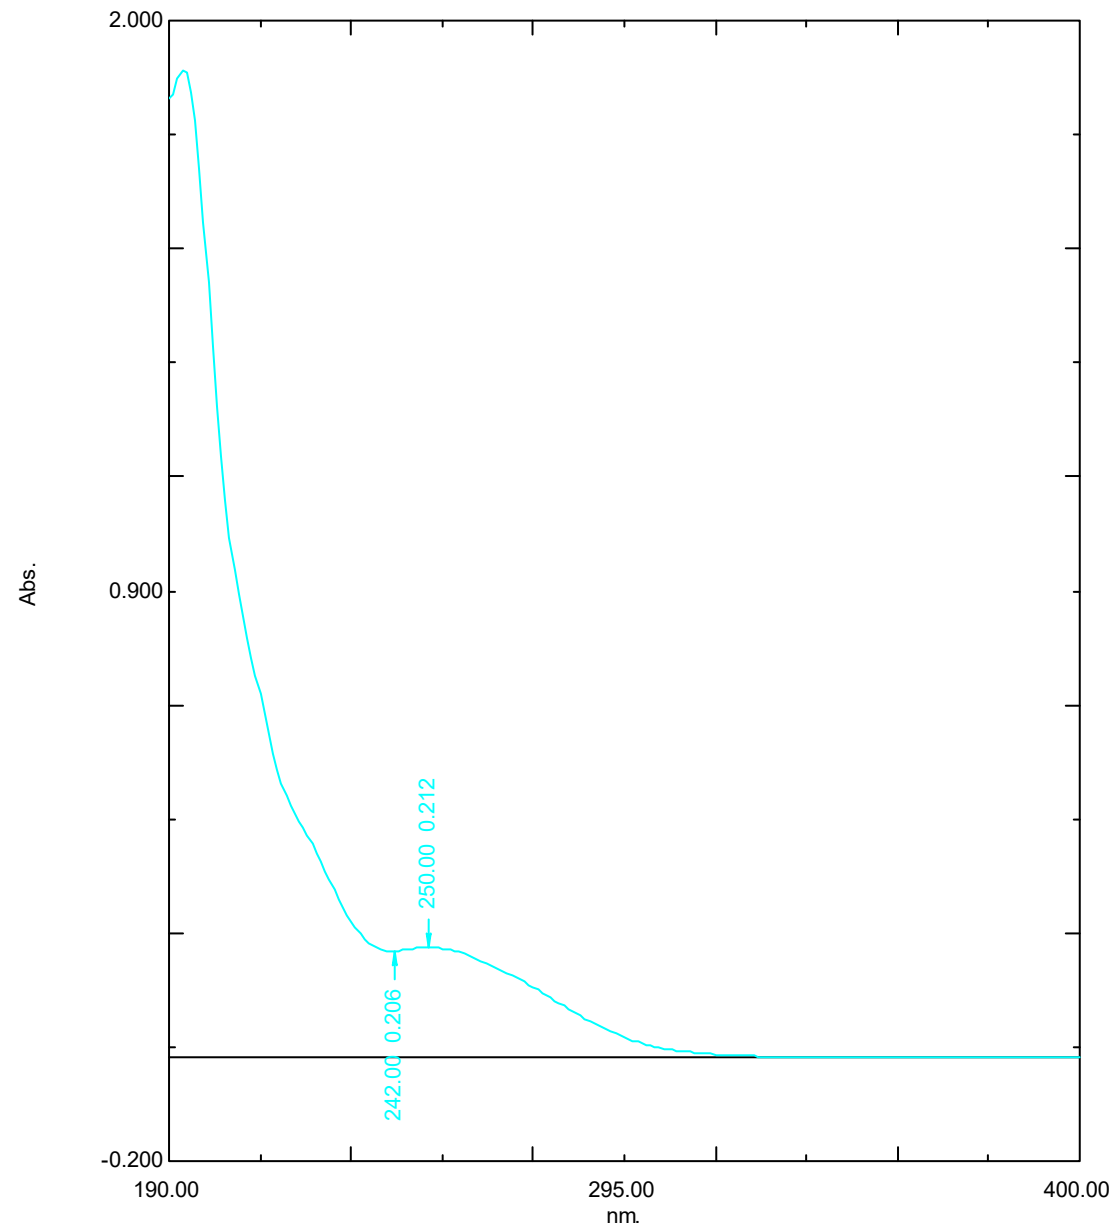

UV absorbance (MeCN,  $1.0 \times 10^{-5} \text{M}$ ) [Cu-9]

Cu(XantPhos)Cl

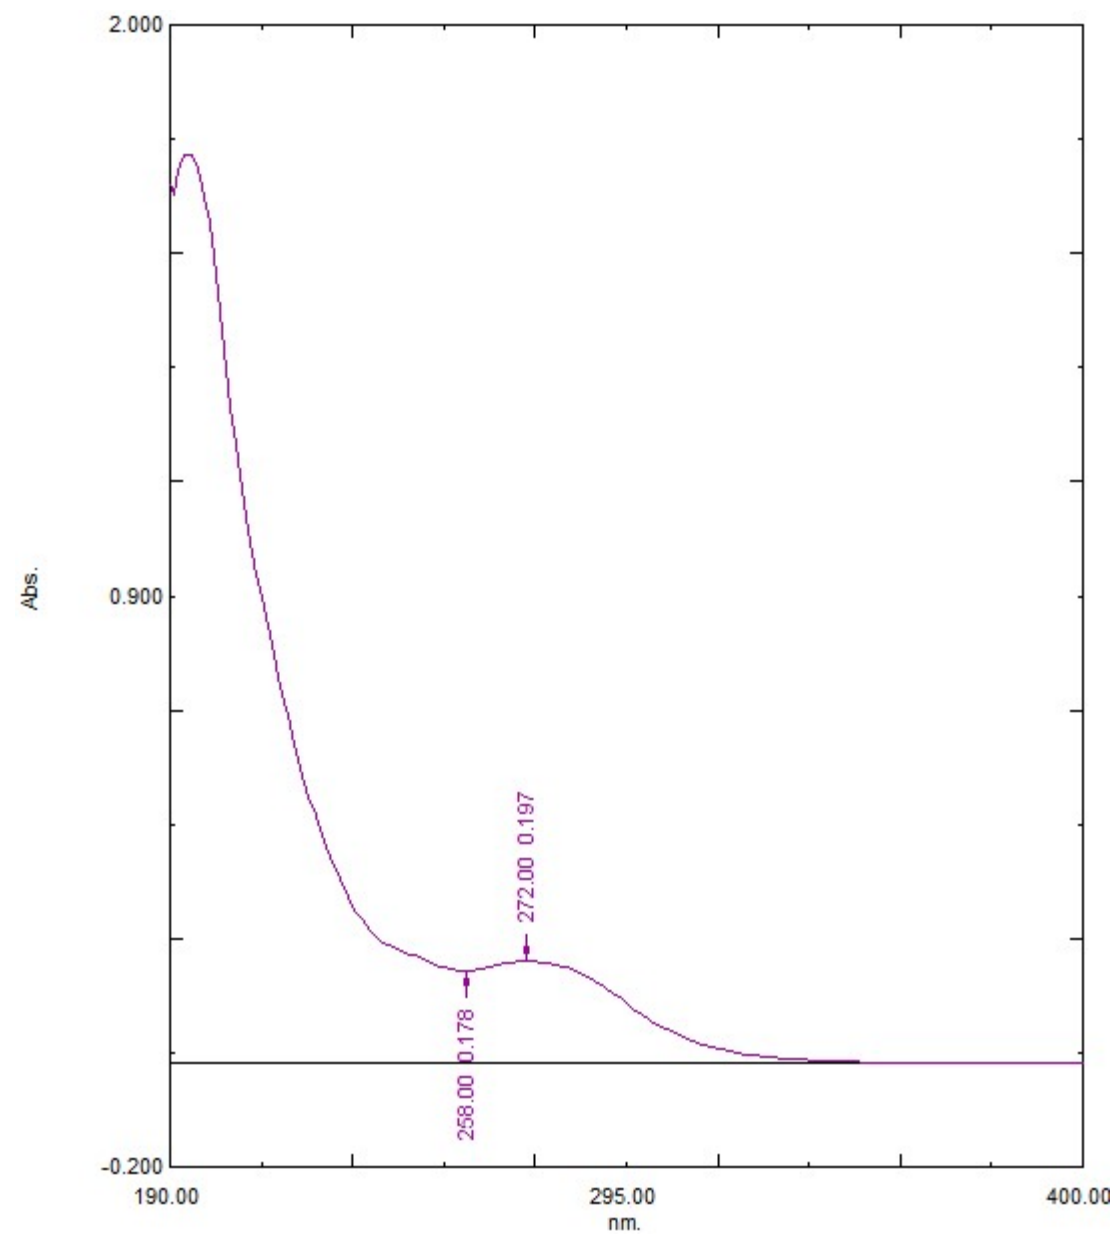

UV absorbance (MeCN,  $1.0 \times 10^{-4} \text{M}$ ) **2a**

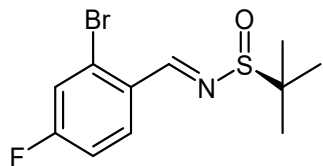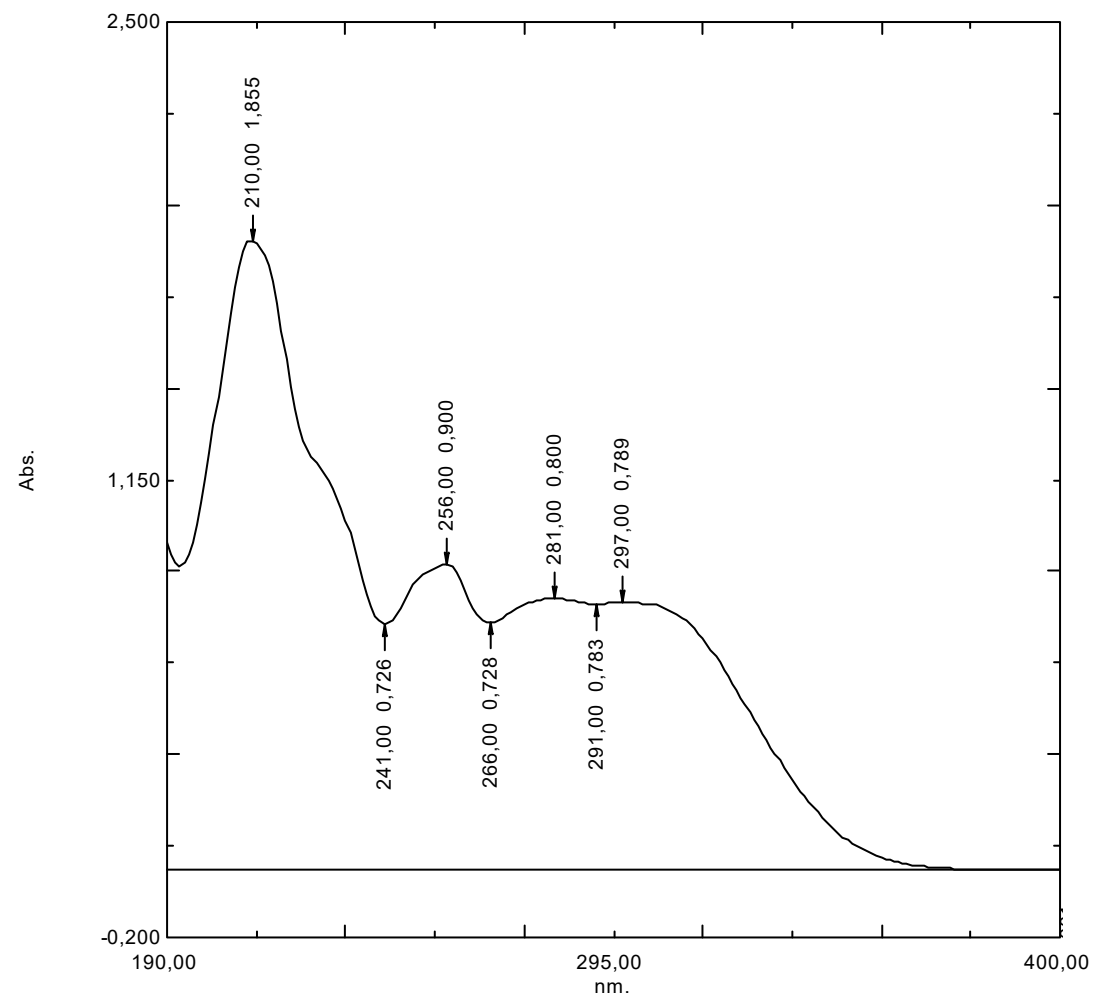

UV absorbance (MeCN,  $1.0 \times 10^{-4} \text{M}$ ) **2b**

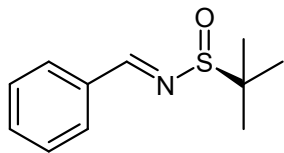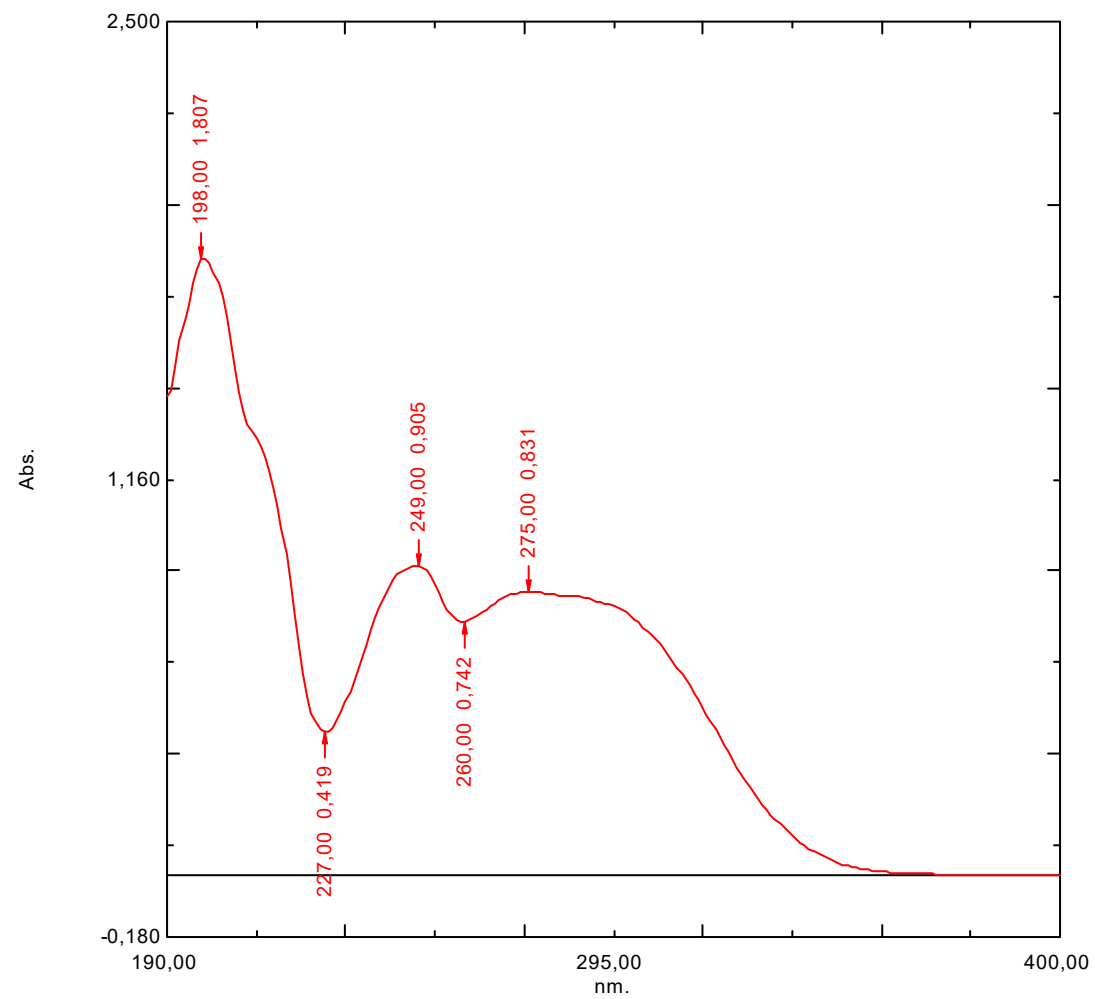

UV absorbance (MeCN,  $1.0 \times 10^{-4} \text{M}$ ) **2c**

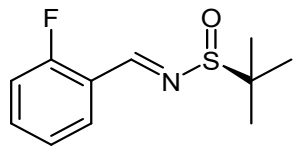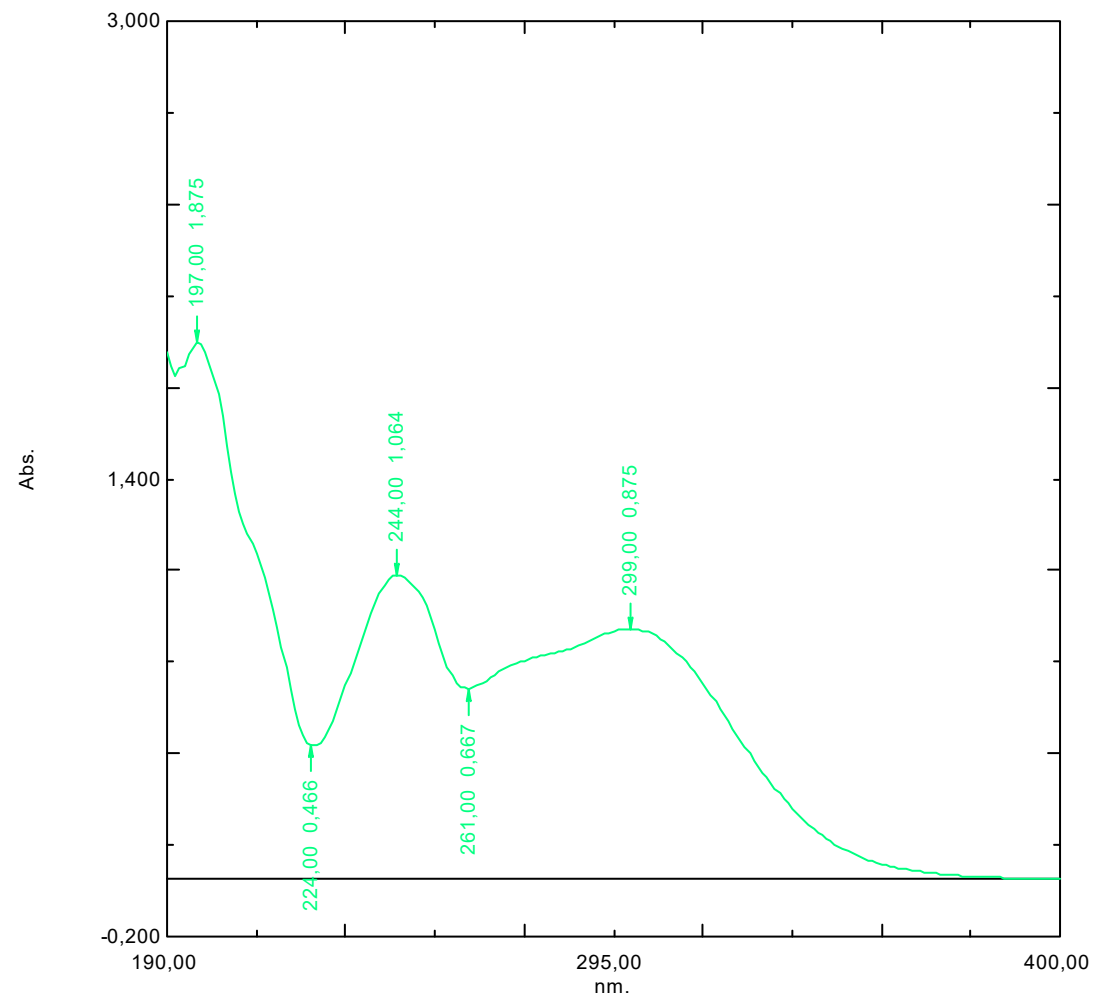

UV absorbance (MeCN,  $1.0 \times 10^{-4} \text{M}$ ) **2d**

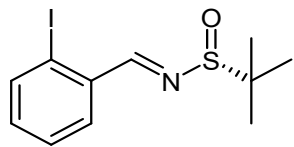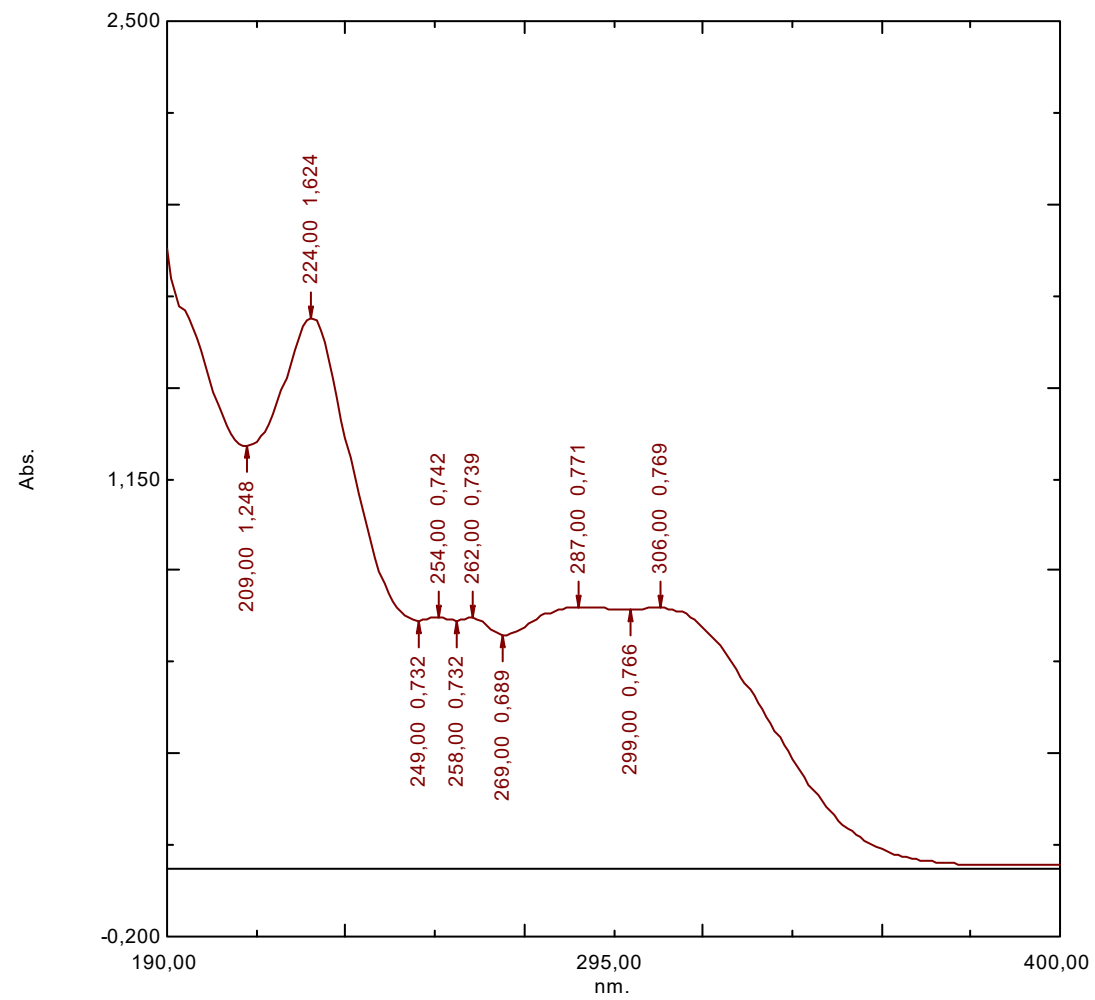

UV absorbance (MeCN,  $1.0 \times 10^{-4} \text{M}$ ) **2e**

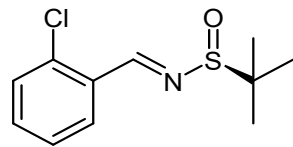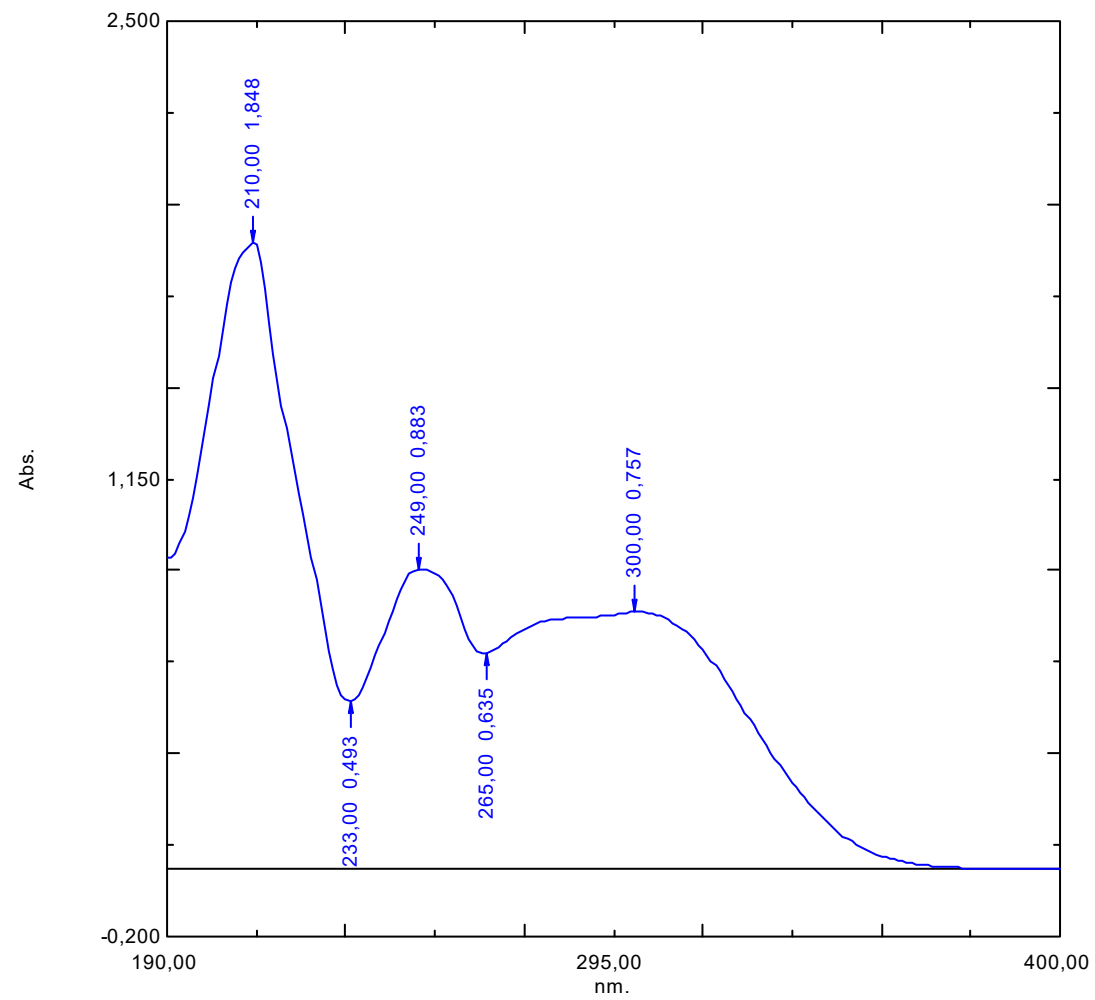



UV absorbance (MeCN,  $1.0 \times 10^{-4} \text{M}$ ) **2f**

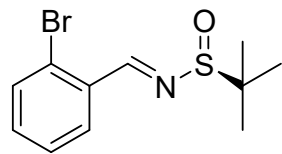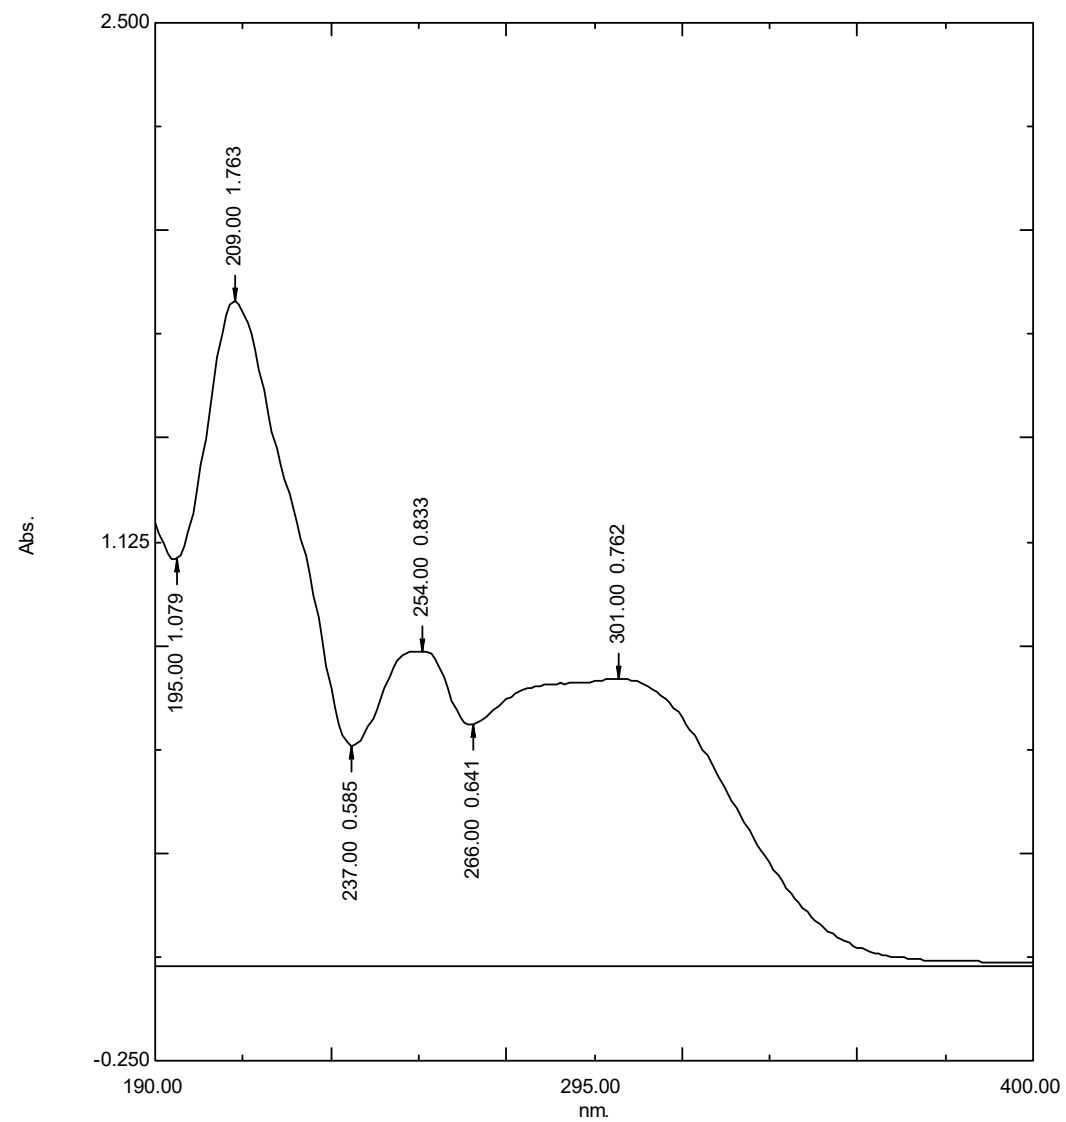

UV absorbance (MeCN,  $1.0 \times 10^{-4} \text{M}$ ) **2g**

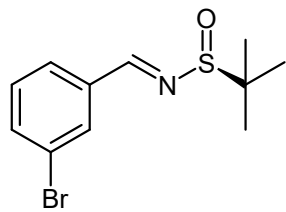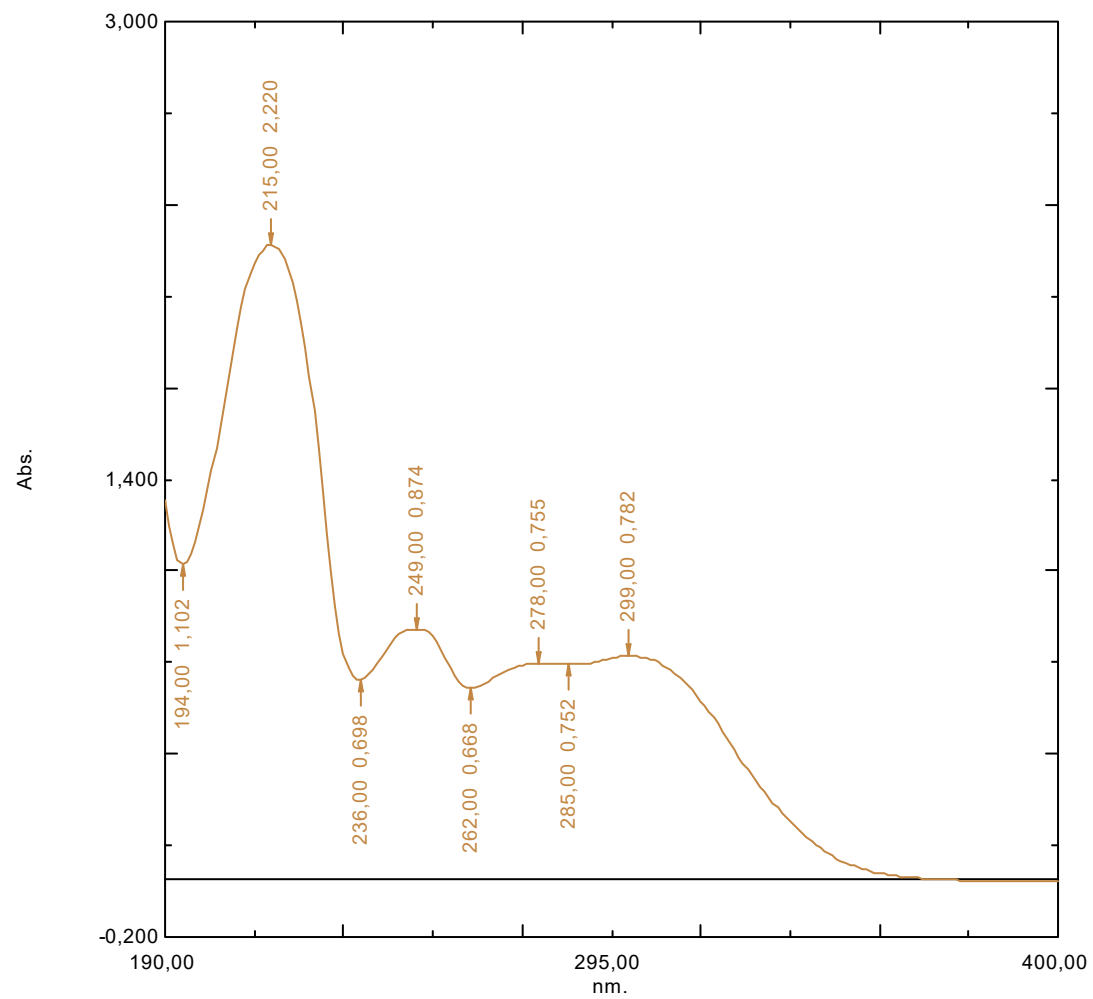

UV absorbance (MeCN,  $1.0 \times 10^{-4} \text{M}$ ) **2h**

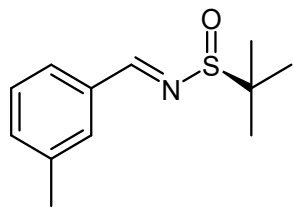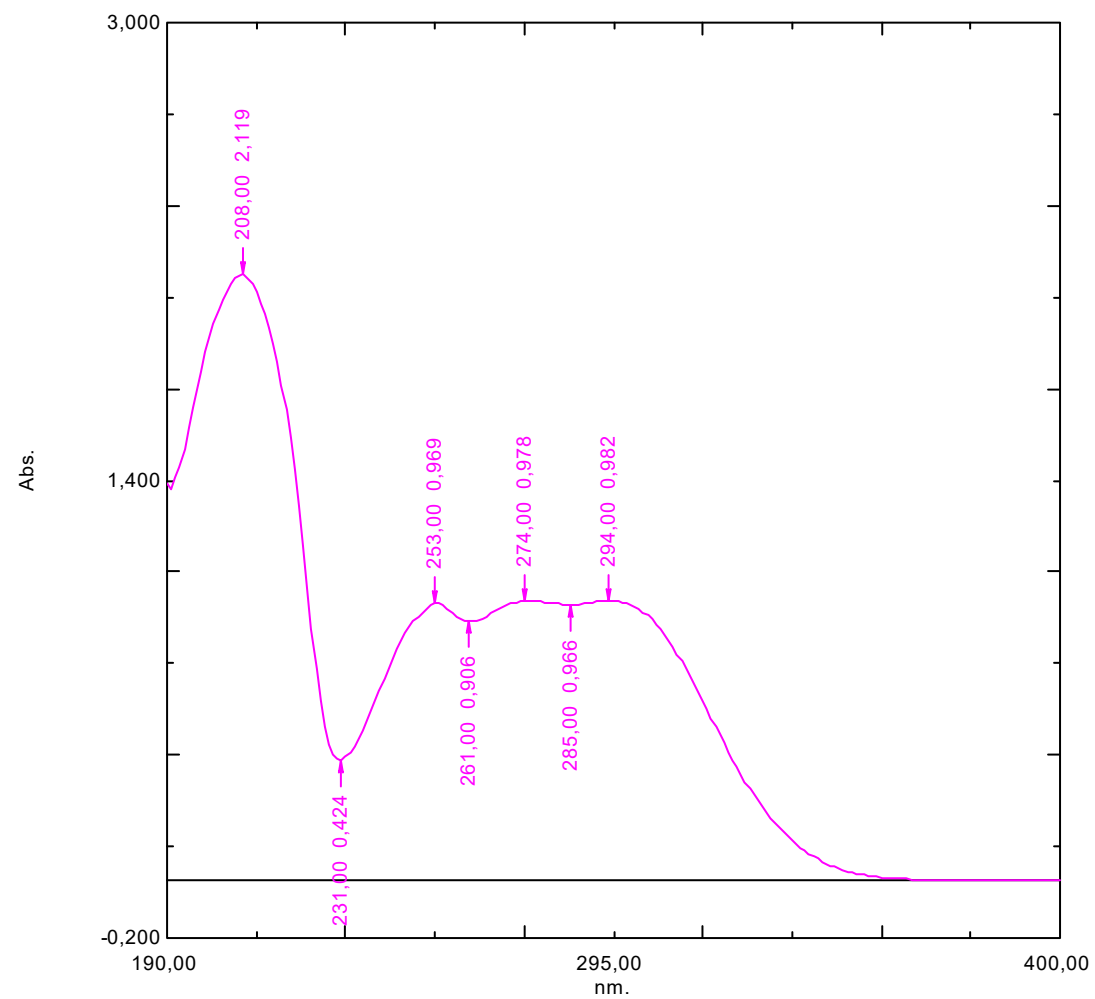

UV absorbance (MeCN,  $1.0 \times 10^{-4} \text{M}$ ) **2i**

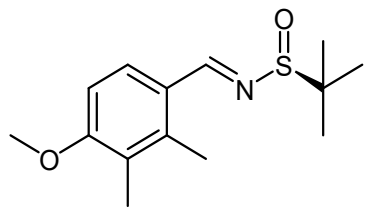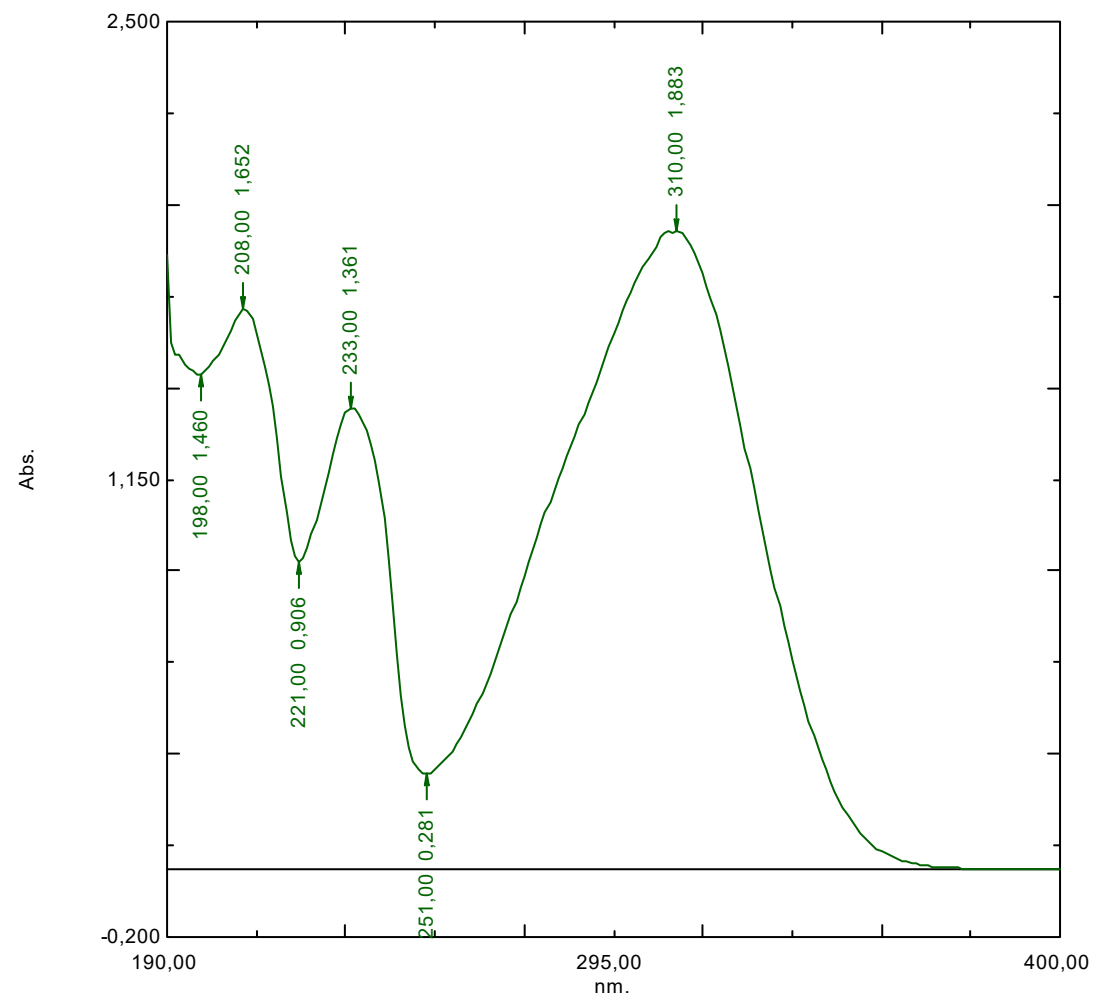

UV absorbance (MeCN,  $1.0 \times 10^{-4} \text{M}$ ) **2j**

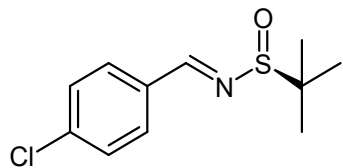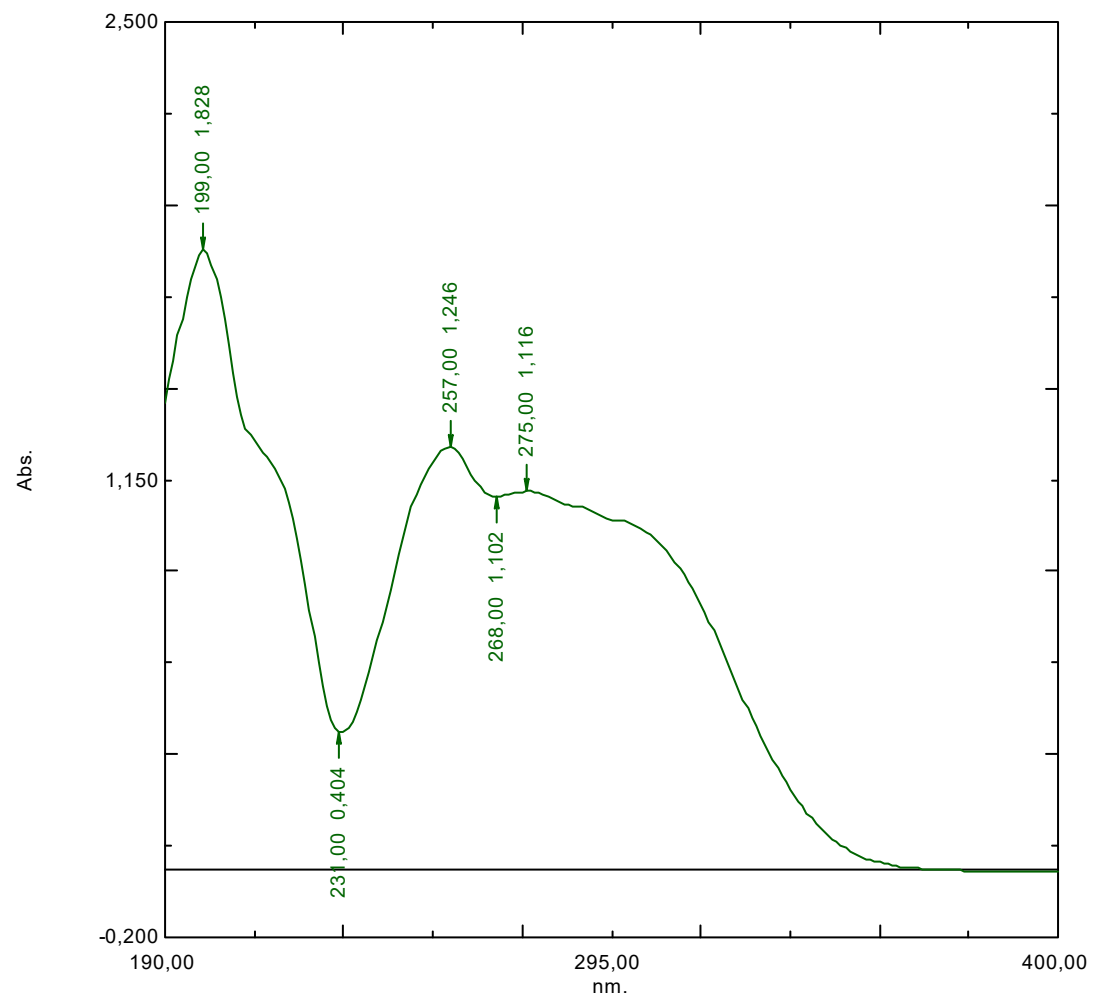

UV absorbance (MeCN,  $1.0 \times 10^{-4} \text{M}$ ) **2k**

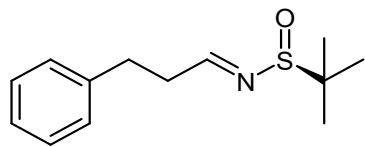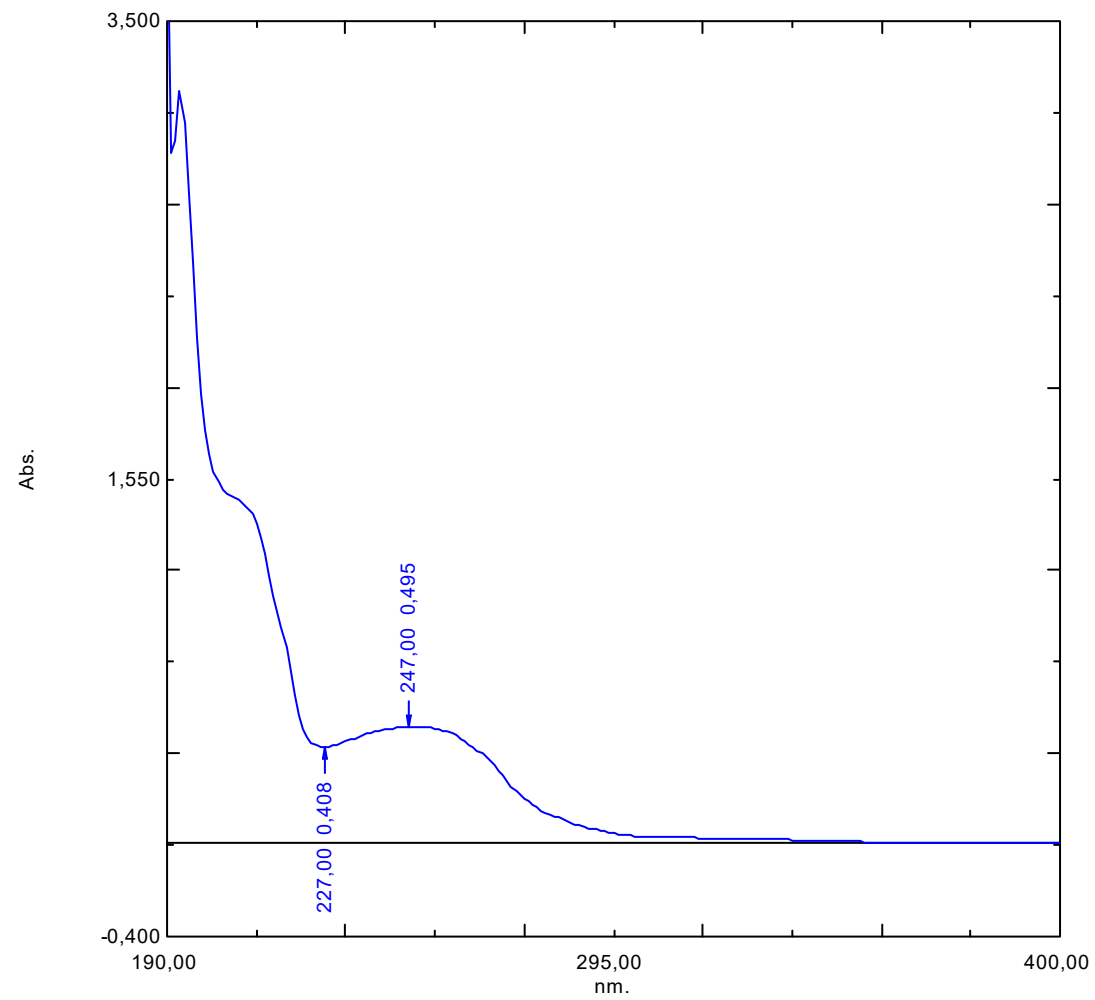

UV absorbance (MeCN,  $0.5 \times 10^{-4} \text{M}$ ) **21**

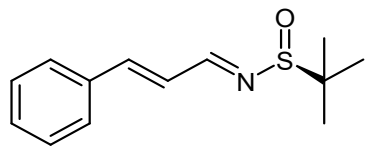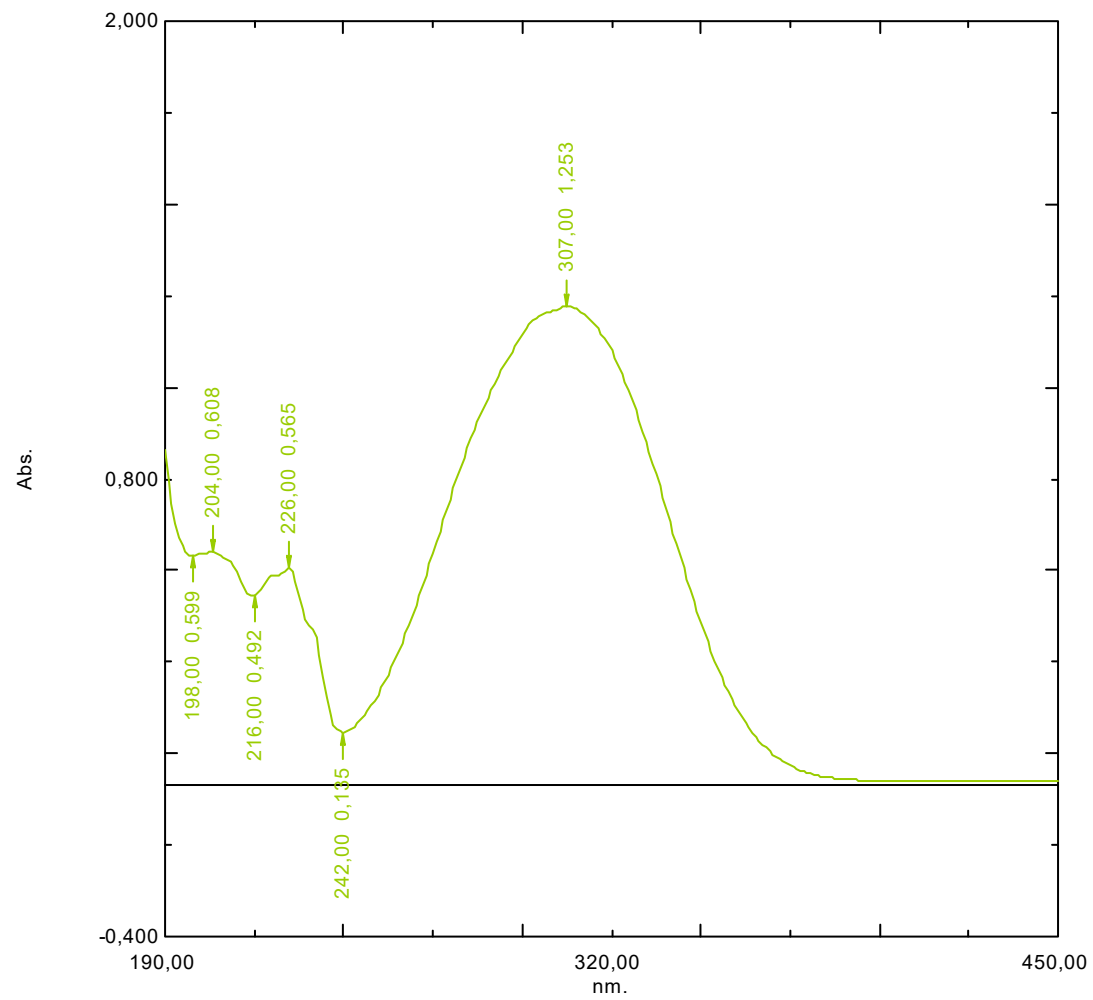

UV absorbance (MeCN,  $0.5 \times 10^{-4} \text{M}$ ) **2m**

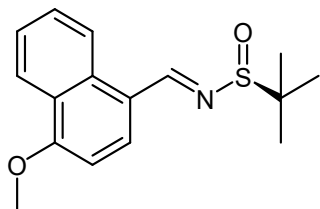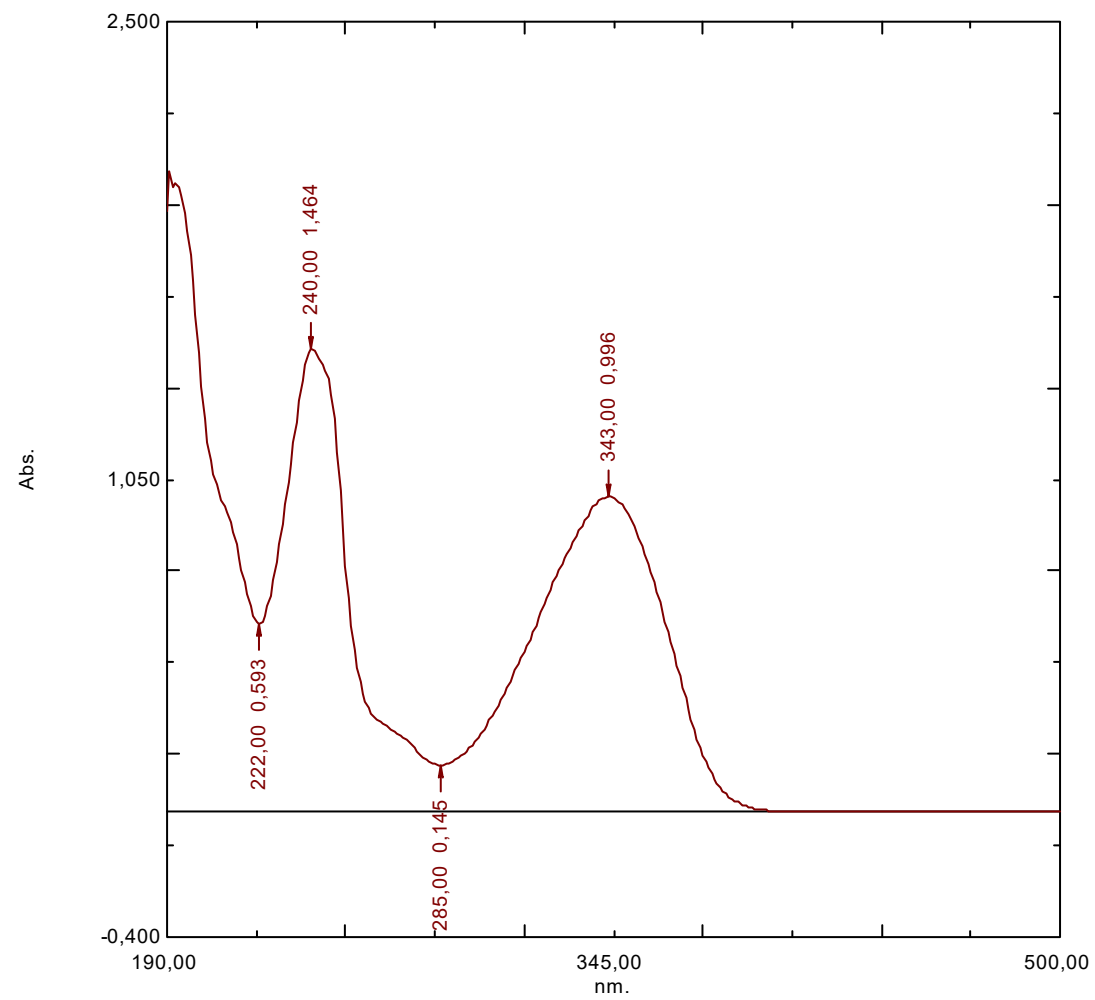



UV absorbance (MeCN,  $1.0 \times 10^{-4} \text{M}$ ) **2n**

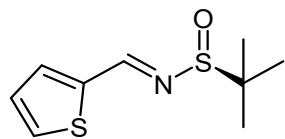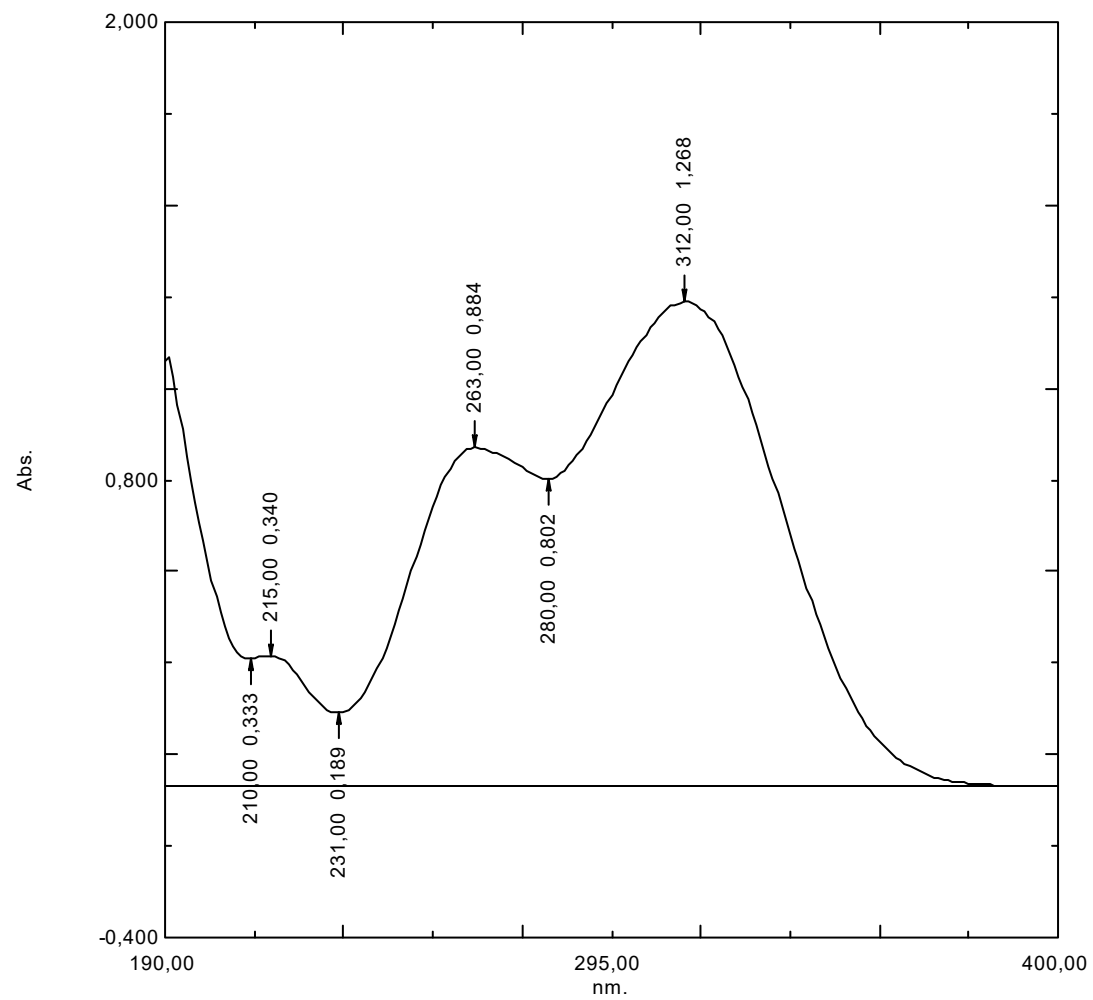

UV absorbance (MeCN,  $1.0 \times 10^{-4} \text{M}$ ) **2o**

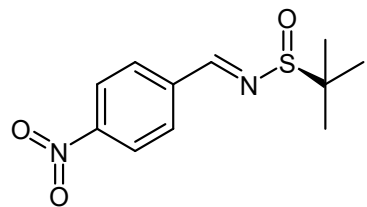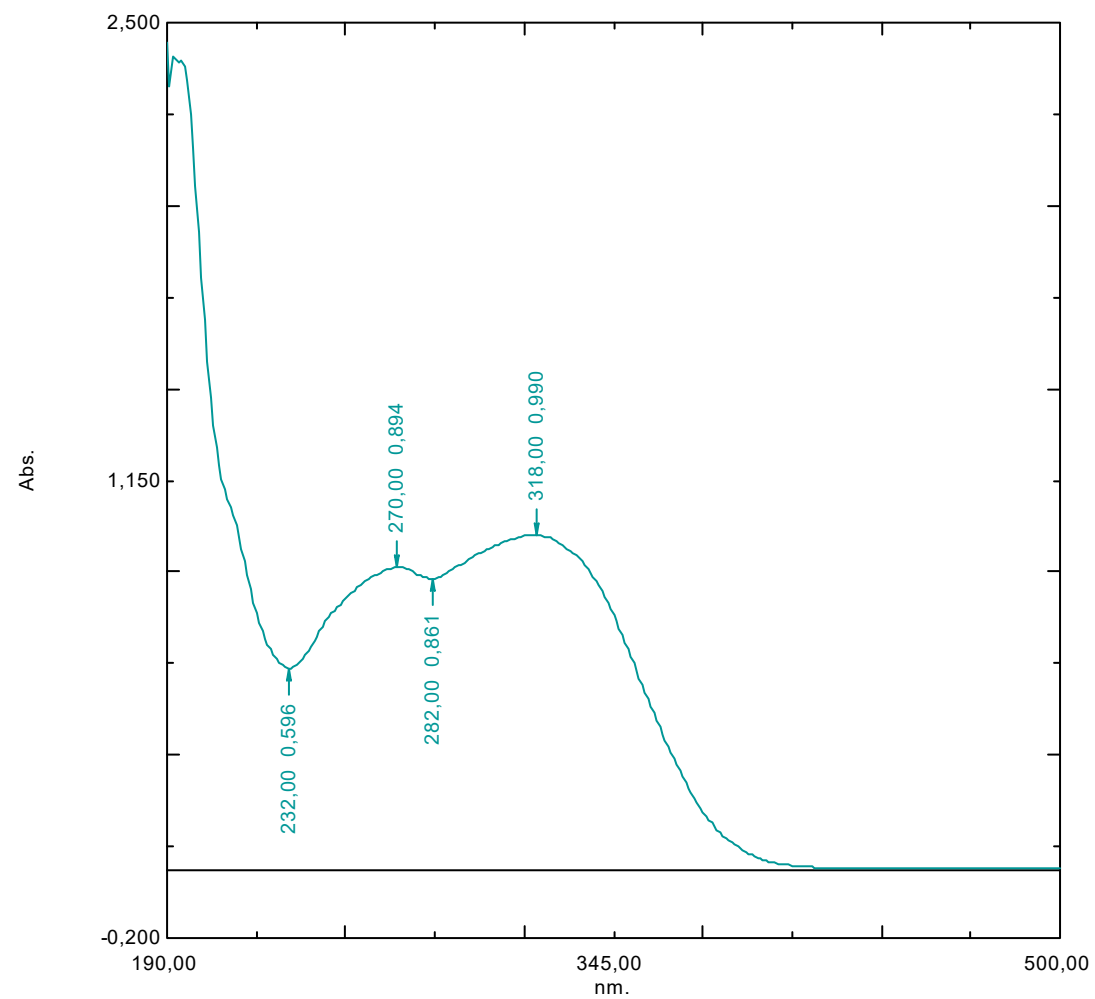

UV absorbance (MeCN,  $0.5 \times 10^{-4} \text{M}$ ) **2p**

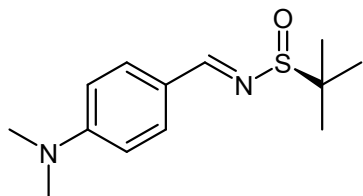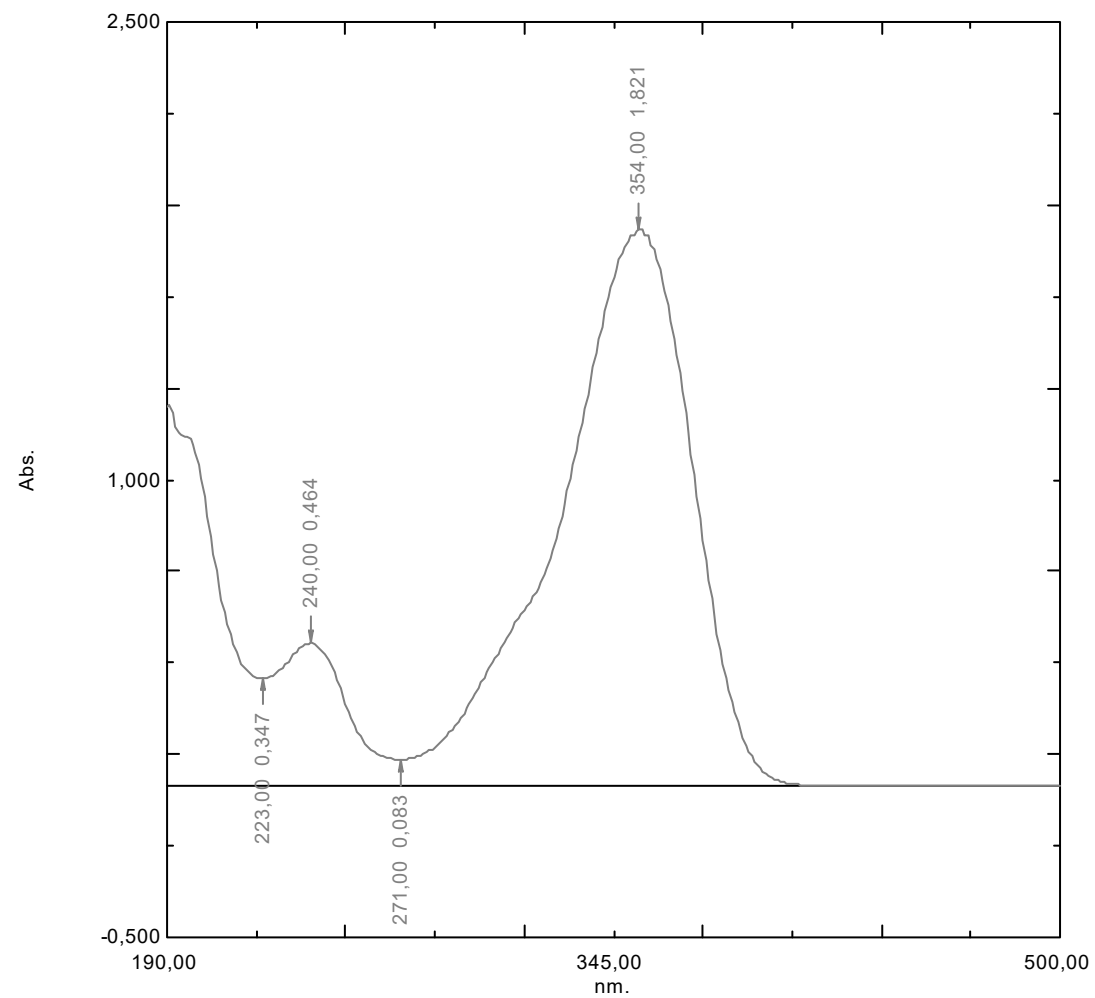

UV absorbance (MeCN,  $1.0 \times 10^{-4} \text{M}$ ) **2q**

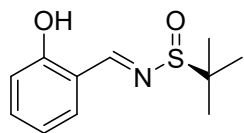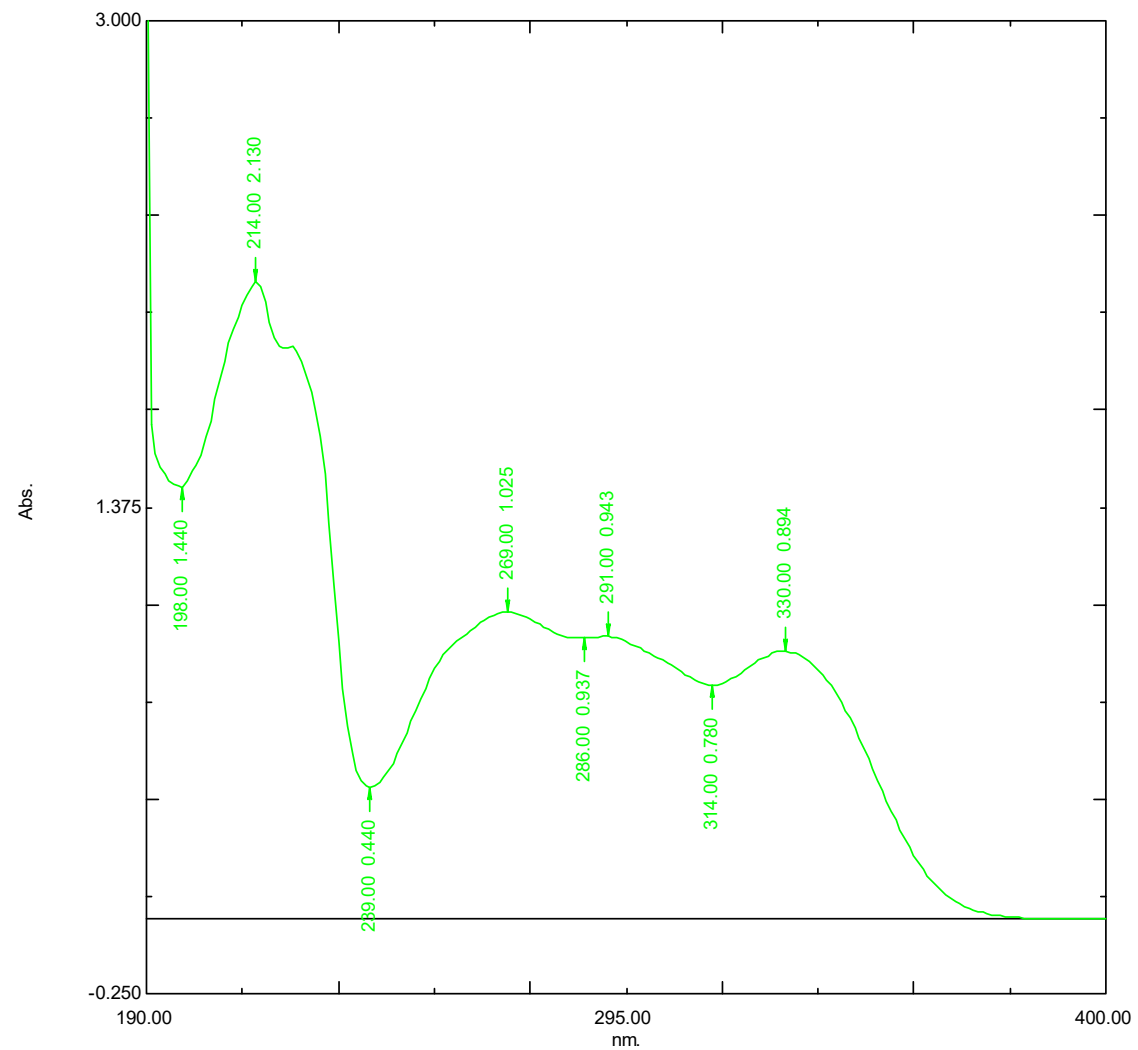

UV absorbance (MeCN,  $1.0 \times 10^{-4} \text{M}$ ) **2r**

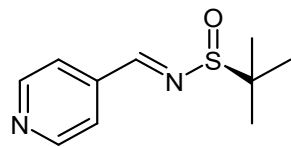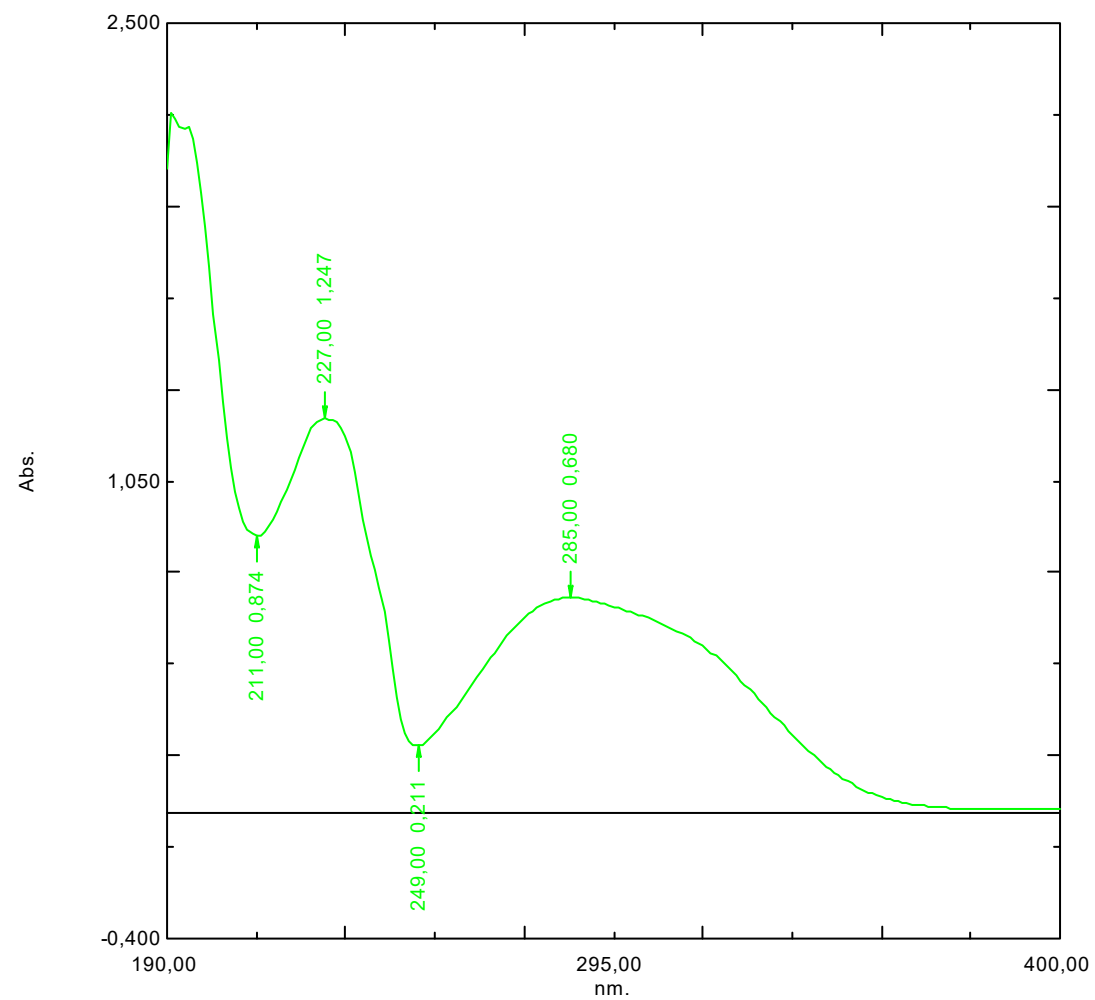

UV absorbance (MeCN,  $1.0 \times 10^{-4} \text{M}$ ) **2s**

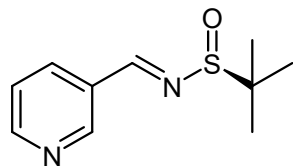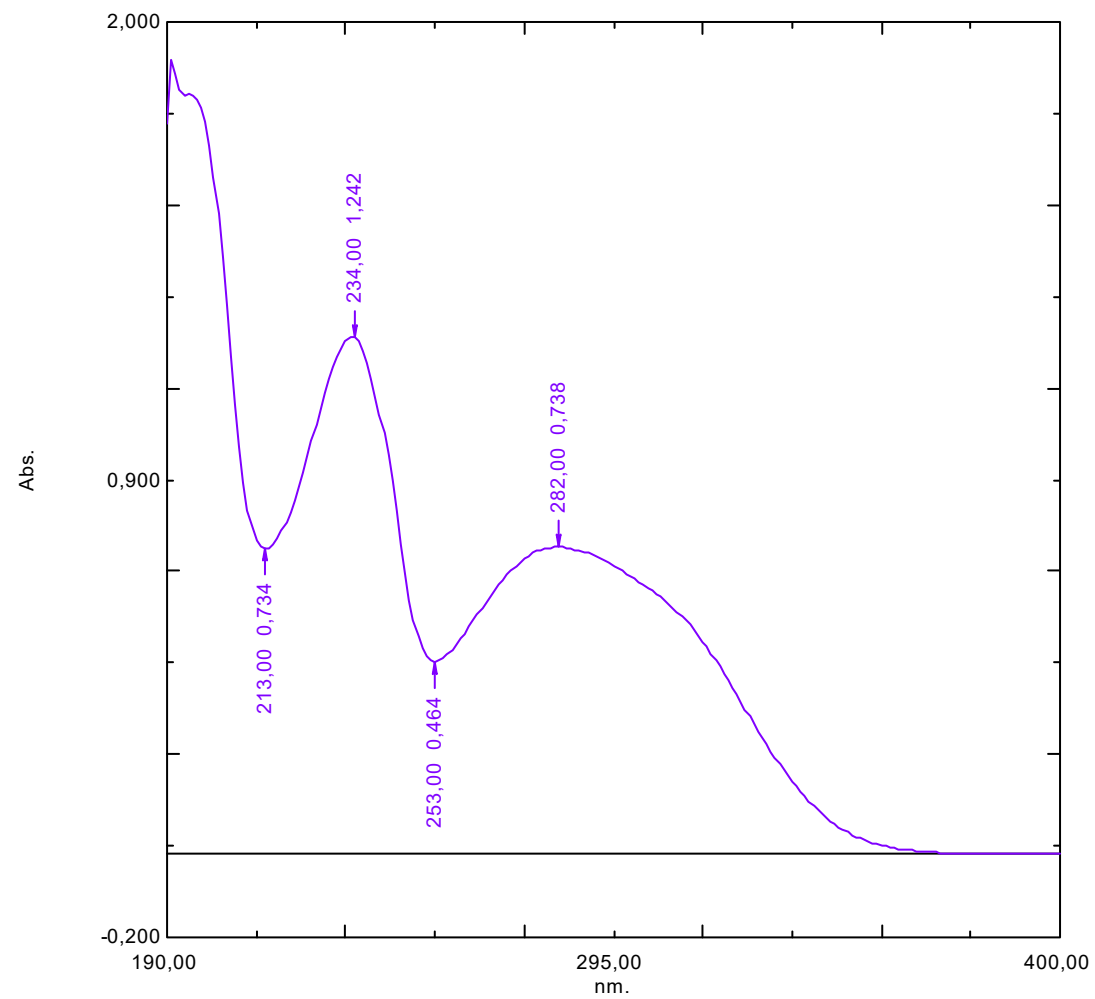

UV absorbance (MeCN,  $1.0 \times 10^{-4} \text{M}$ ) **2t**

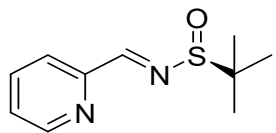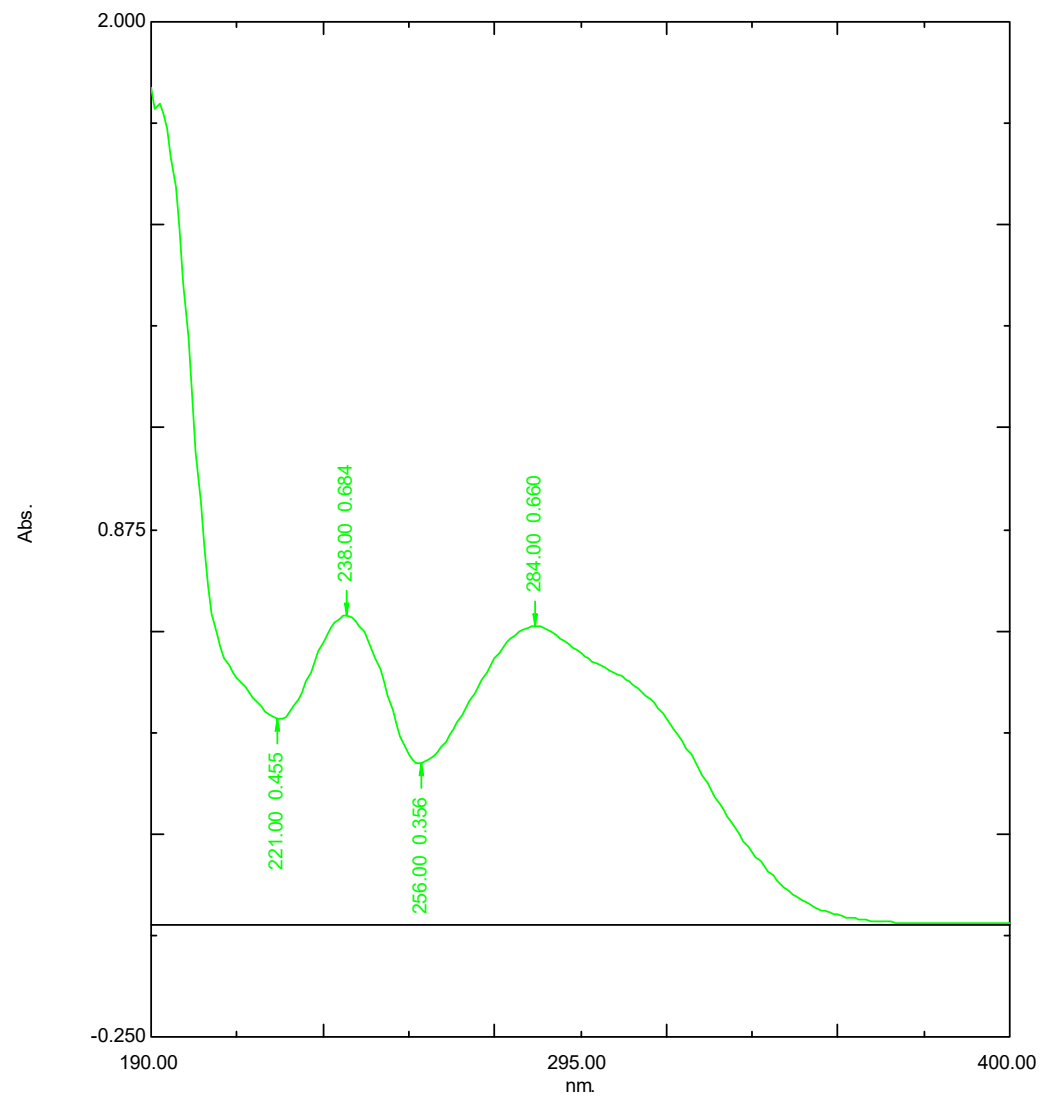

UV absorbance (MeCN,  $1.0 \times 10^{-4} \text{M}$ ) **2u**

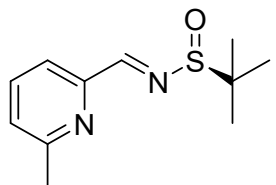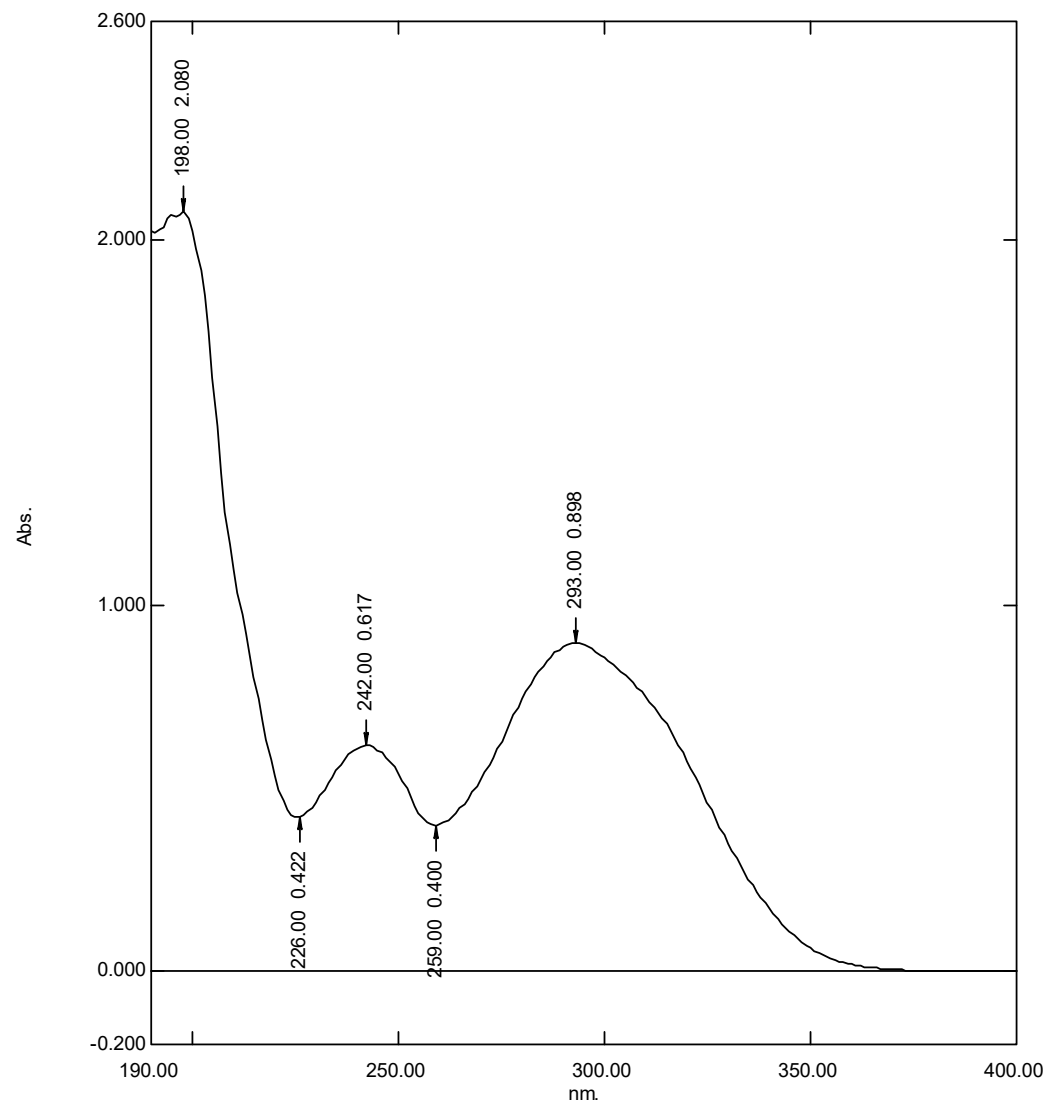



UV absorbance (MeCN,  $1.0 \times 10^{-4} \text{M}$ ) **2v**

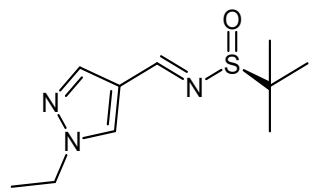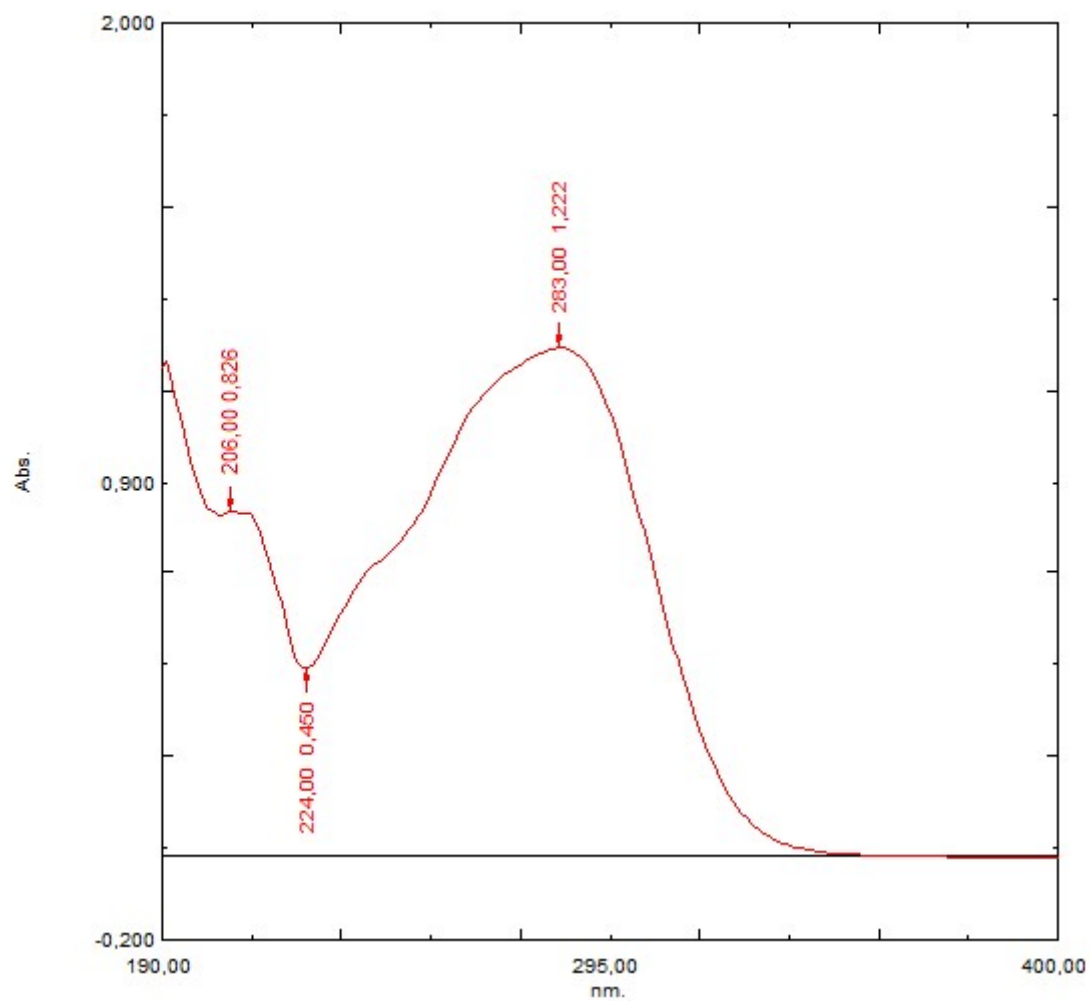

UV absorbance (MeCN,  $0.5 \times 10^{-4} \text{M}$ ) **2w**

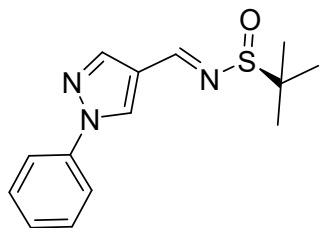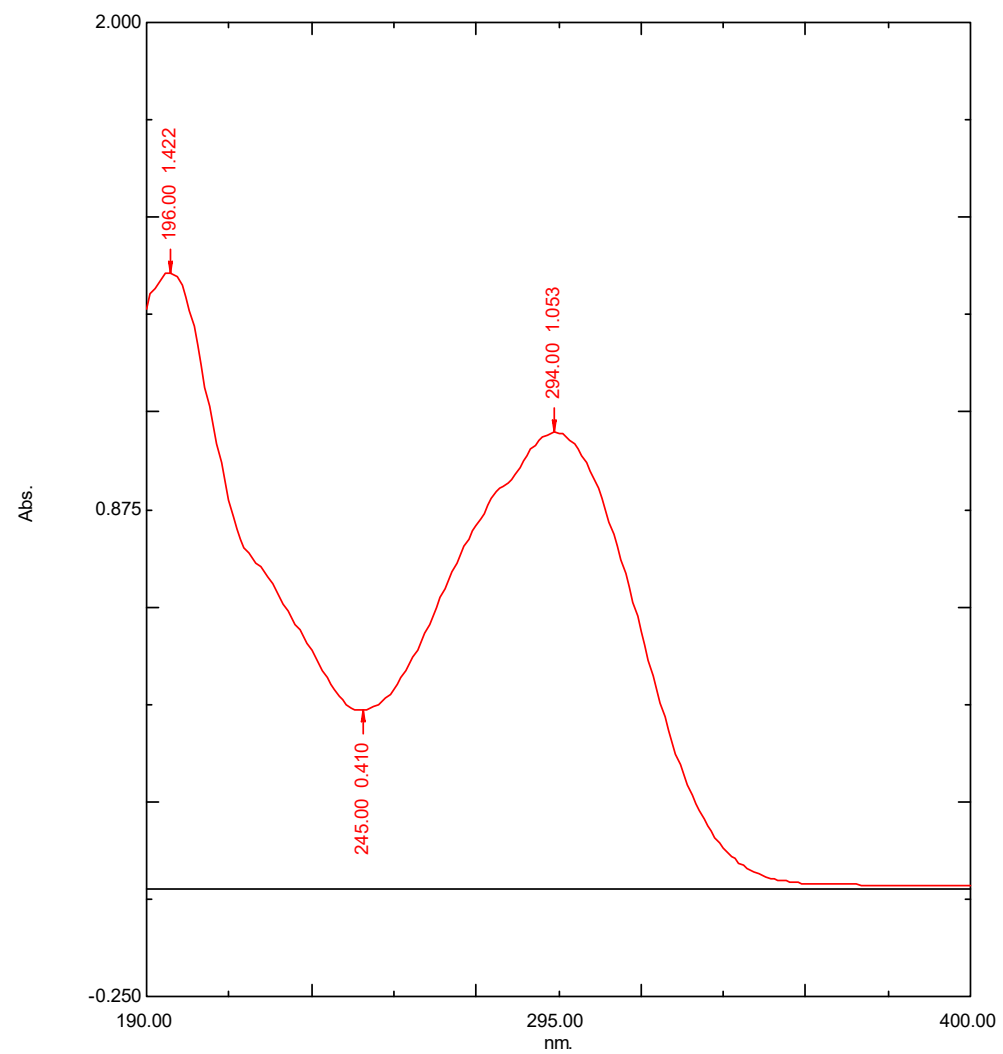

UV absorbance (MeCN,  $1.0 \times 10^{-3} \text{M}$ ) **3a**

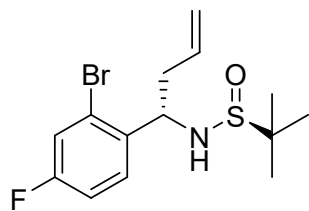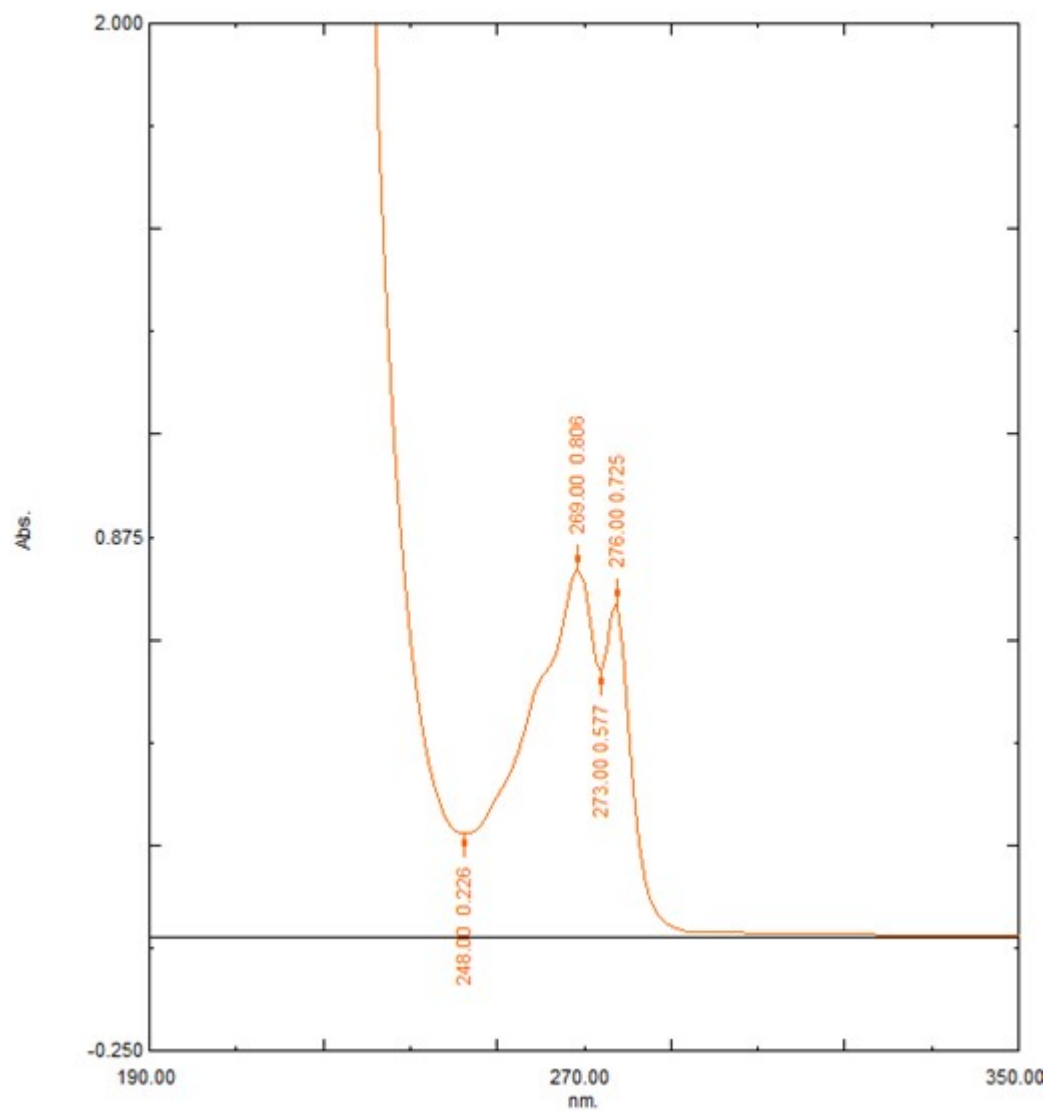

UV absorbance (MeCN,  $1.0 \times 10^{-3} \text{M}$ ) **3b**

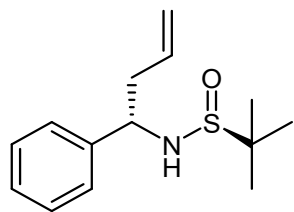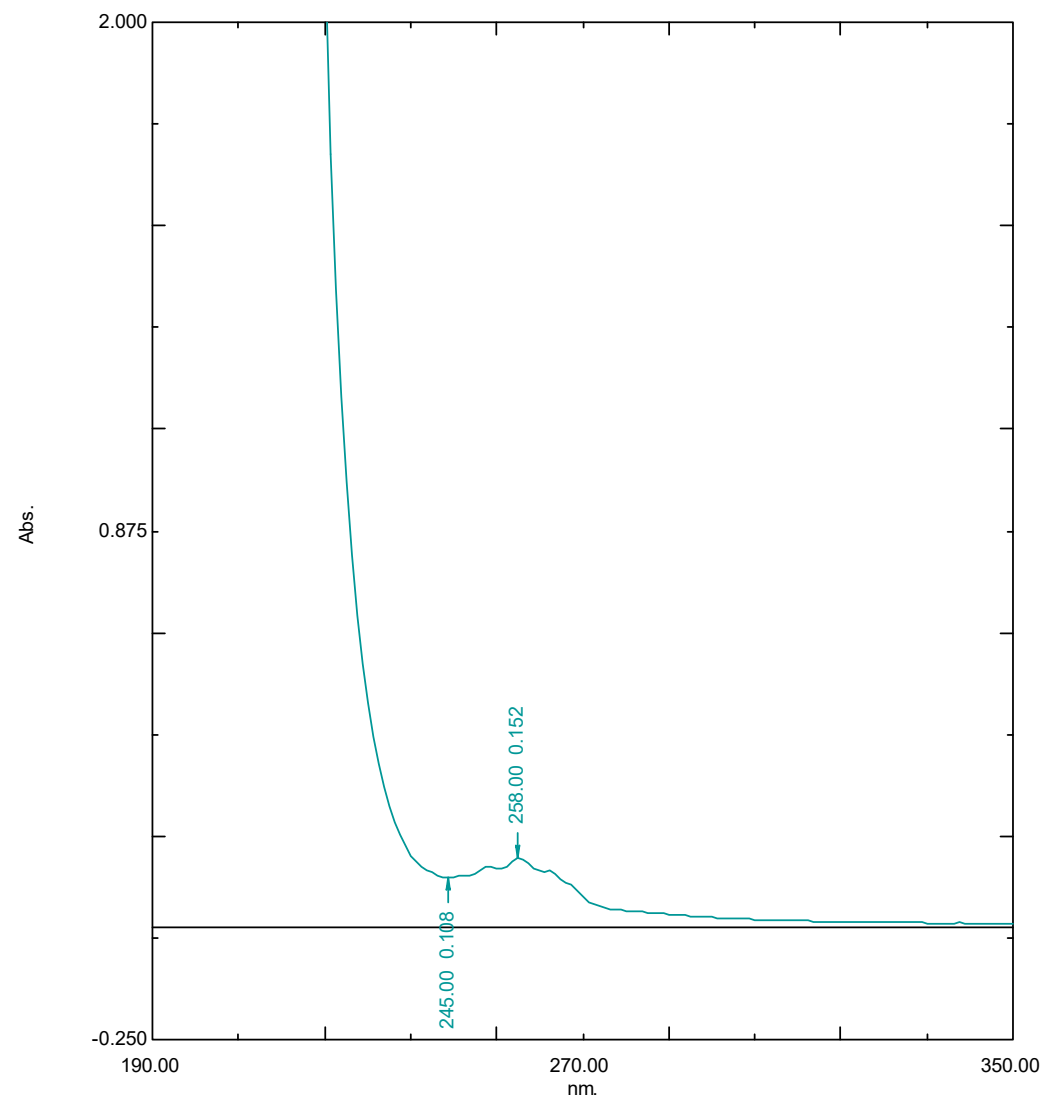

UV absorbance (MeCN,  $1.0 \times 10^{-3} \text{M}$ ) **3c**

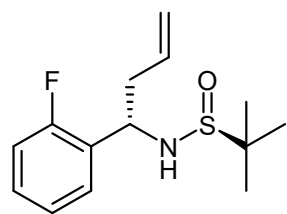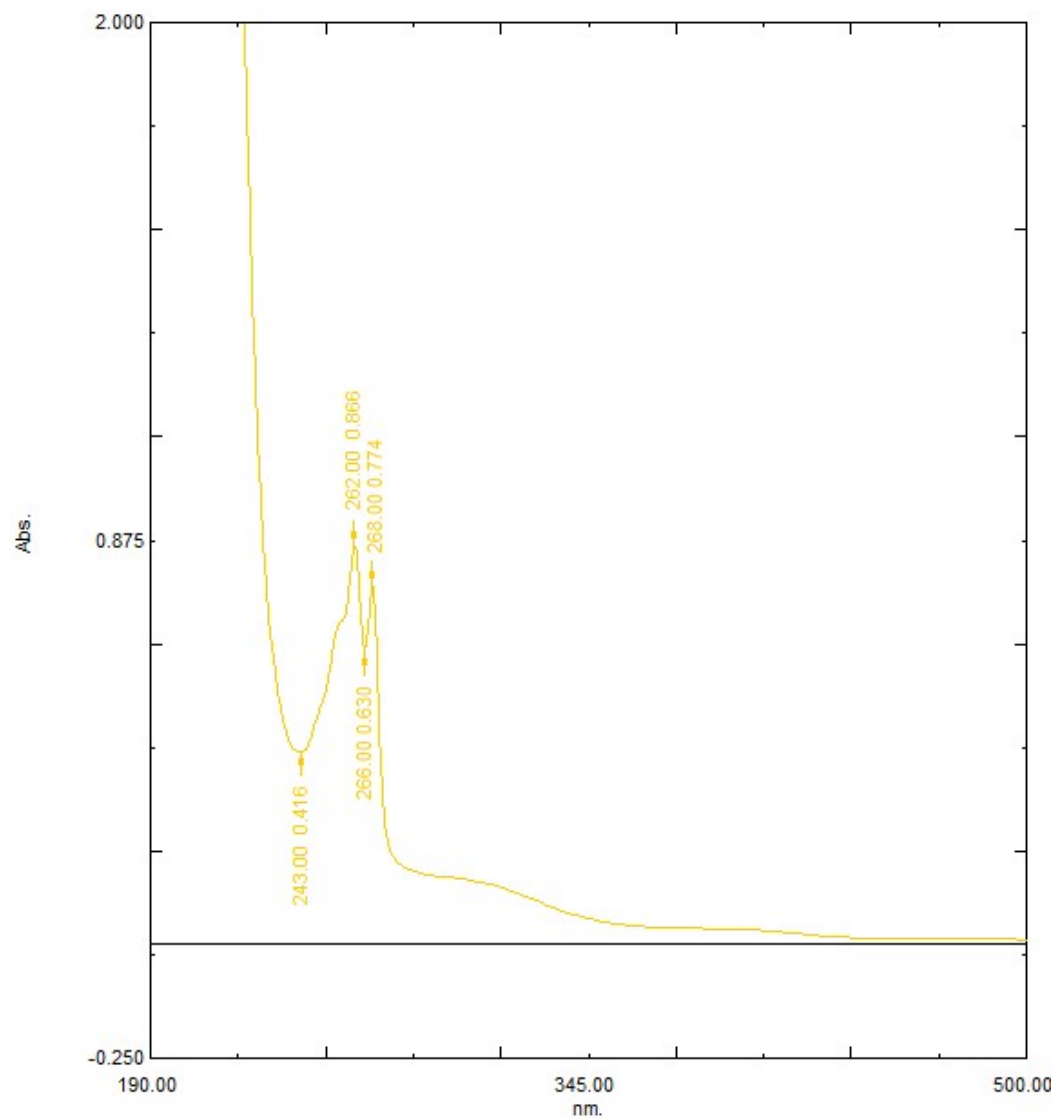

UV absorbance (MeCN,  $1.0 \times 10^{-3} \text{M}$ ) **3d**

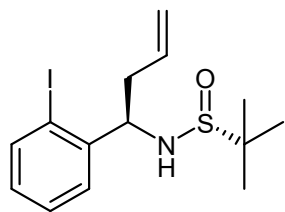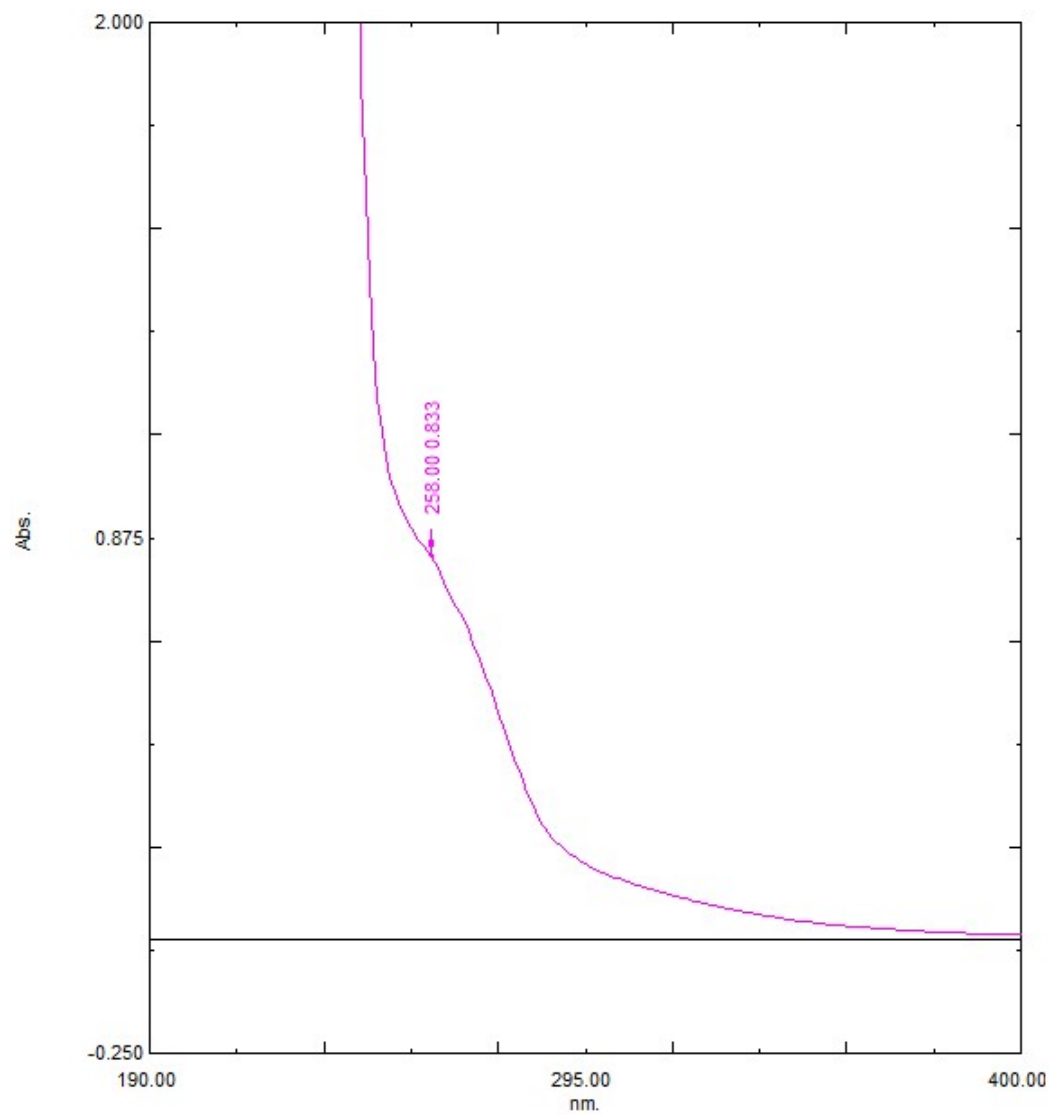

UV absorbance (MeCN,  $1.0 \times 10^{-3} \text{M}$ ) **3e**

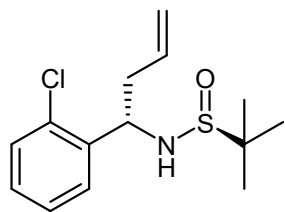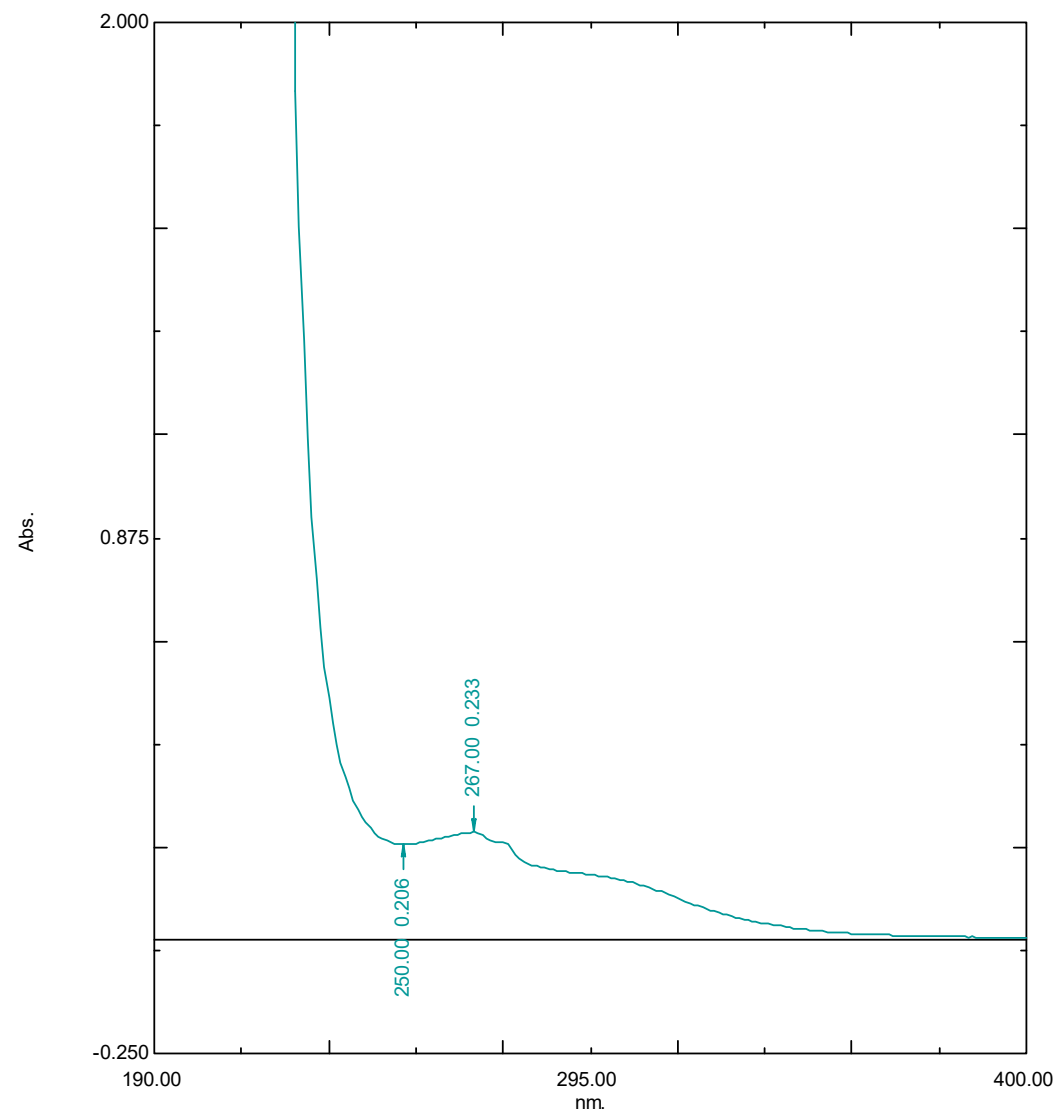

UV absorbance (MeCN,  $1.0 \times 10^{-3} \text{M}$ ) **3f**

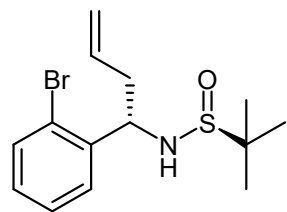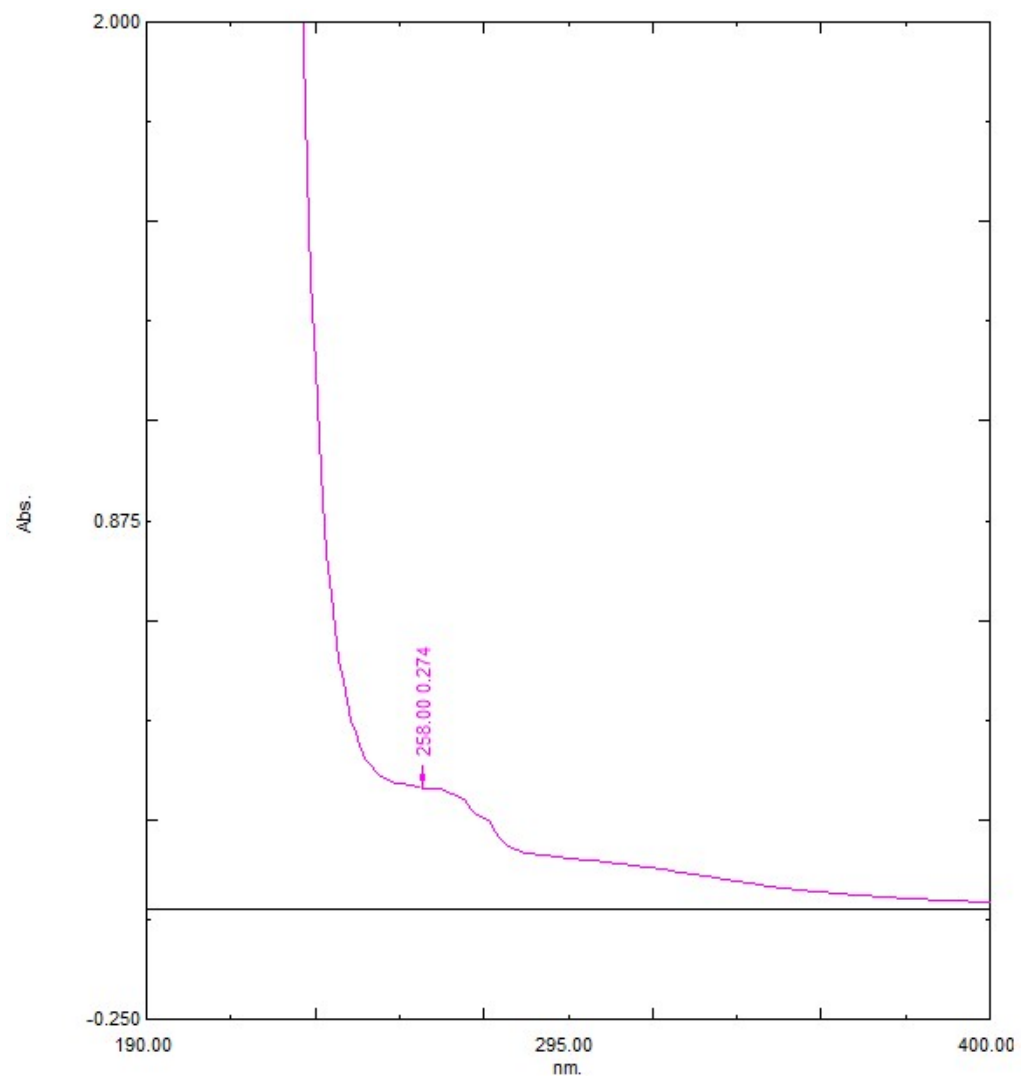



UV absorbance (MeCN,  $1.0 \times 10^{-3} \text{M}$ ) **3g**

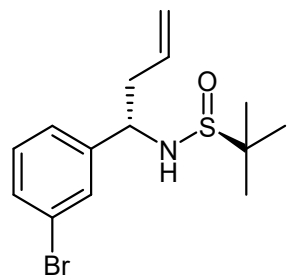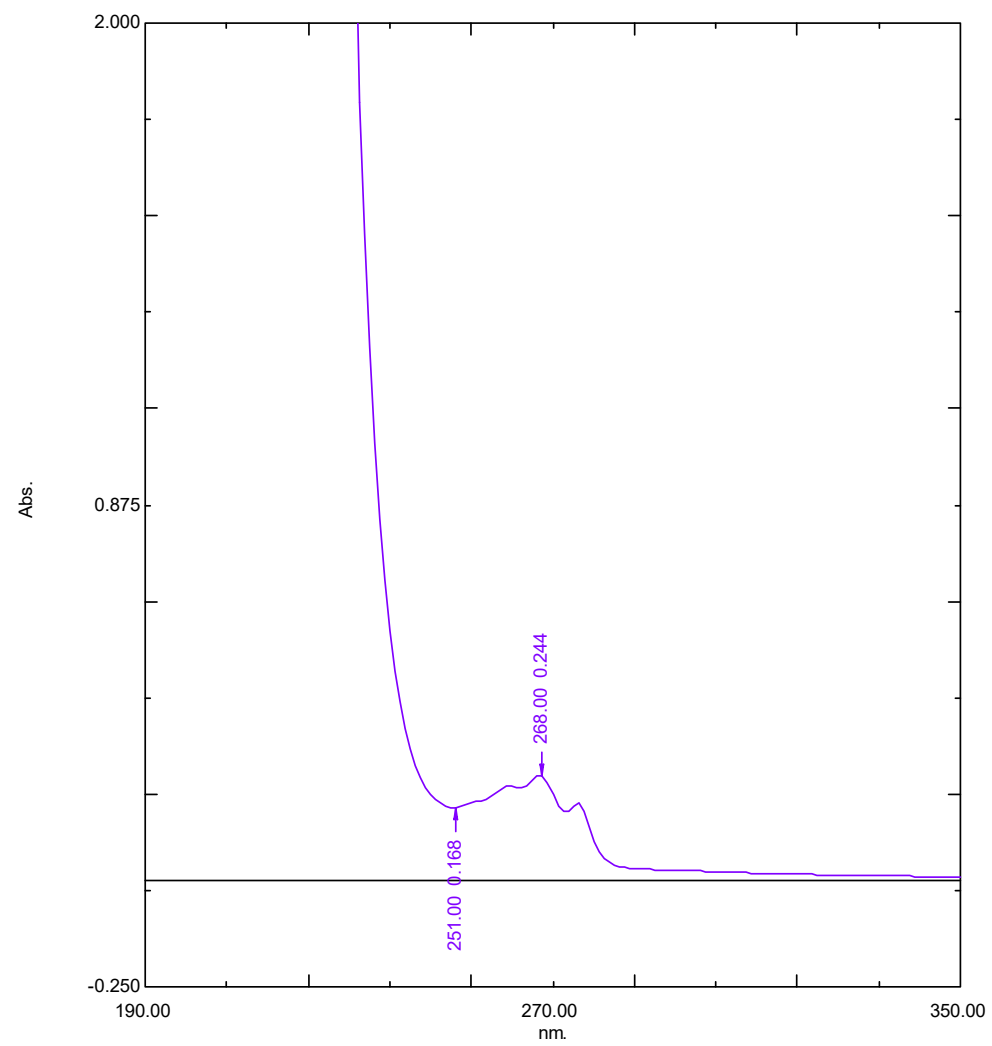

UV absorbance (MeCN,  $1.0 \times 10^{-3} \text{M}$ ) **3h**

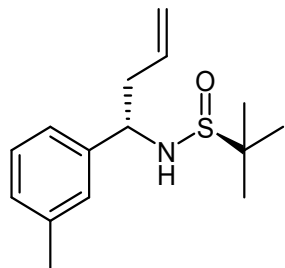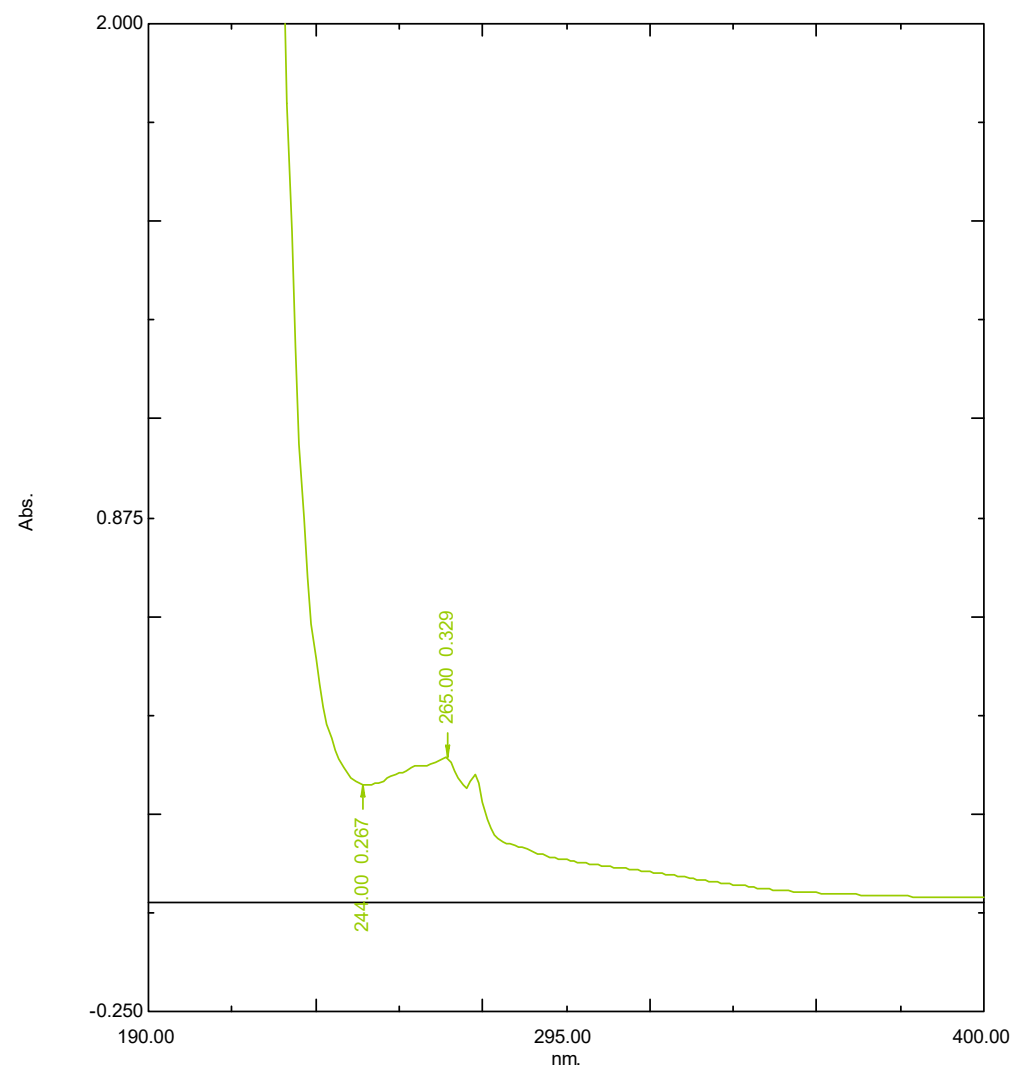

UV absorbance (MeCN,  $1.0 \times 10^{-3} \text{M}$ ) **3i**

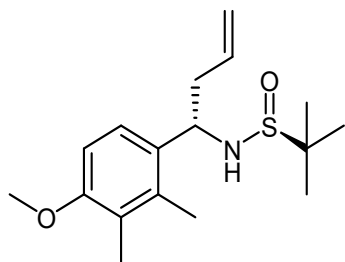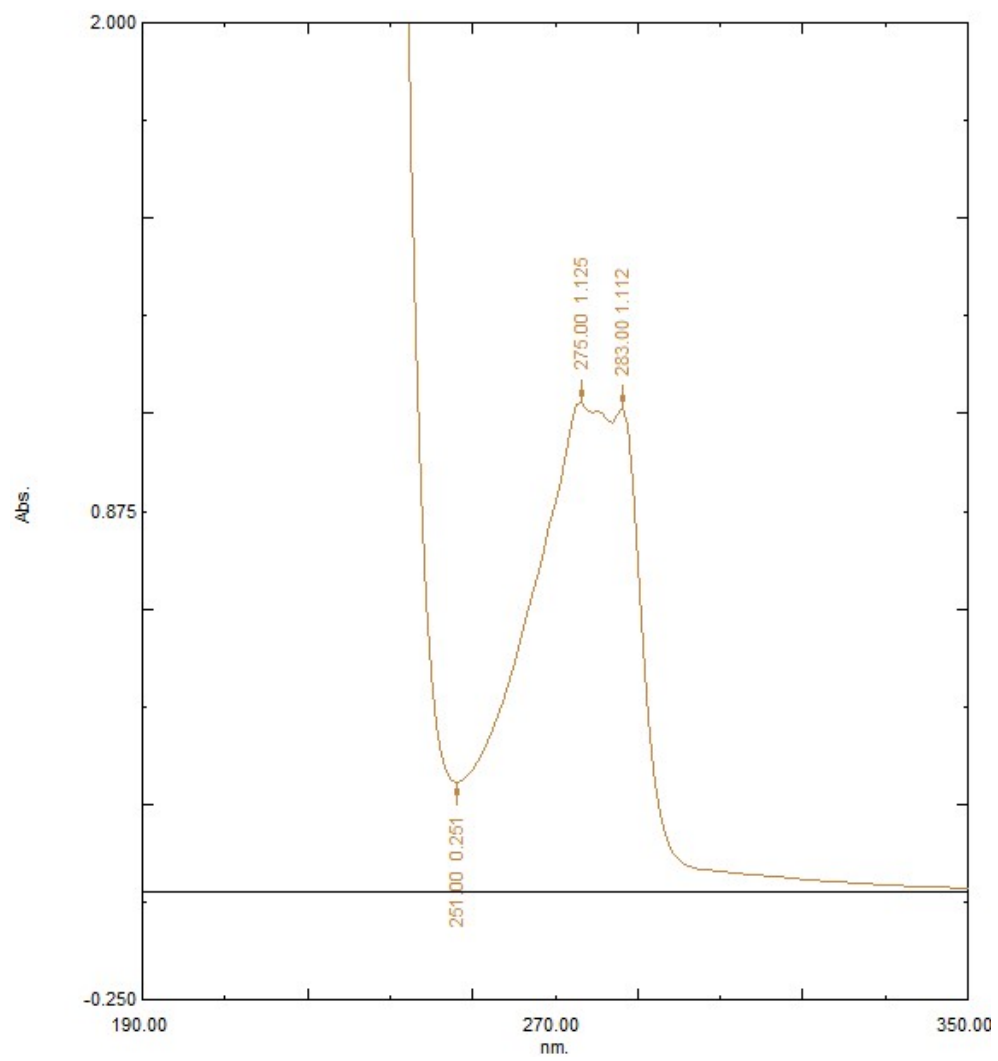

UV absorbance (MeCN,  $1.0 \times 10^{-3} \text{M}$ ) **3j**

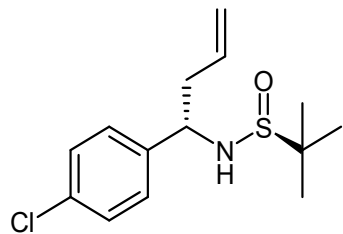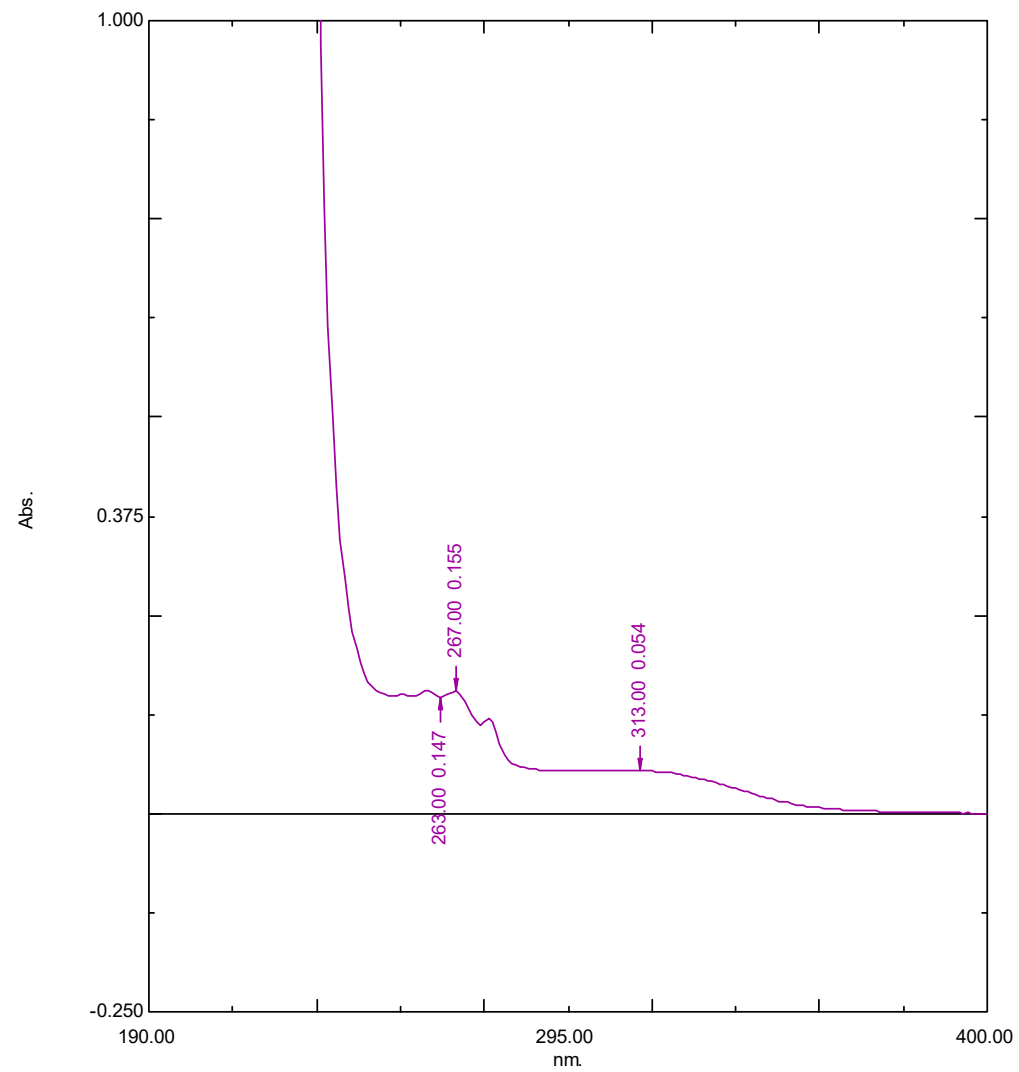

UV absorbance (MeCN,  $1.0 \times 10^{-3} \text{M}$ ) **3k**

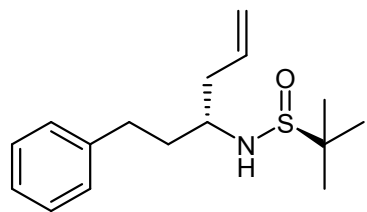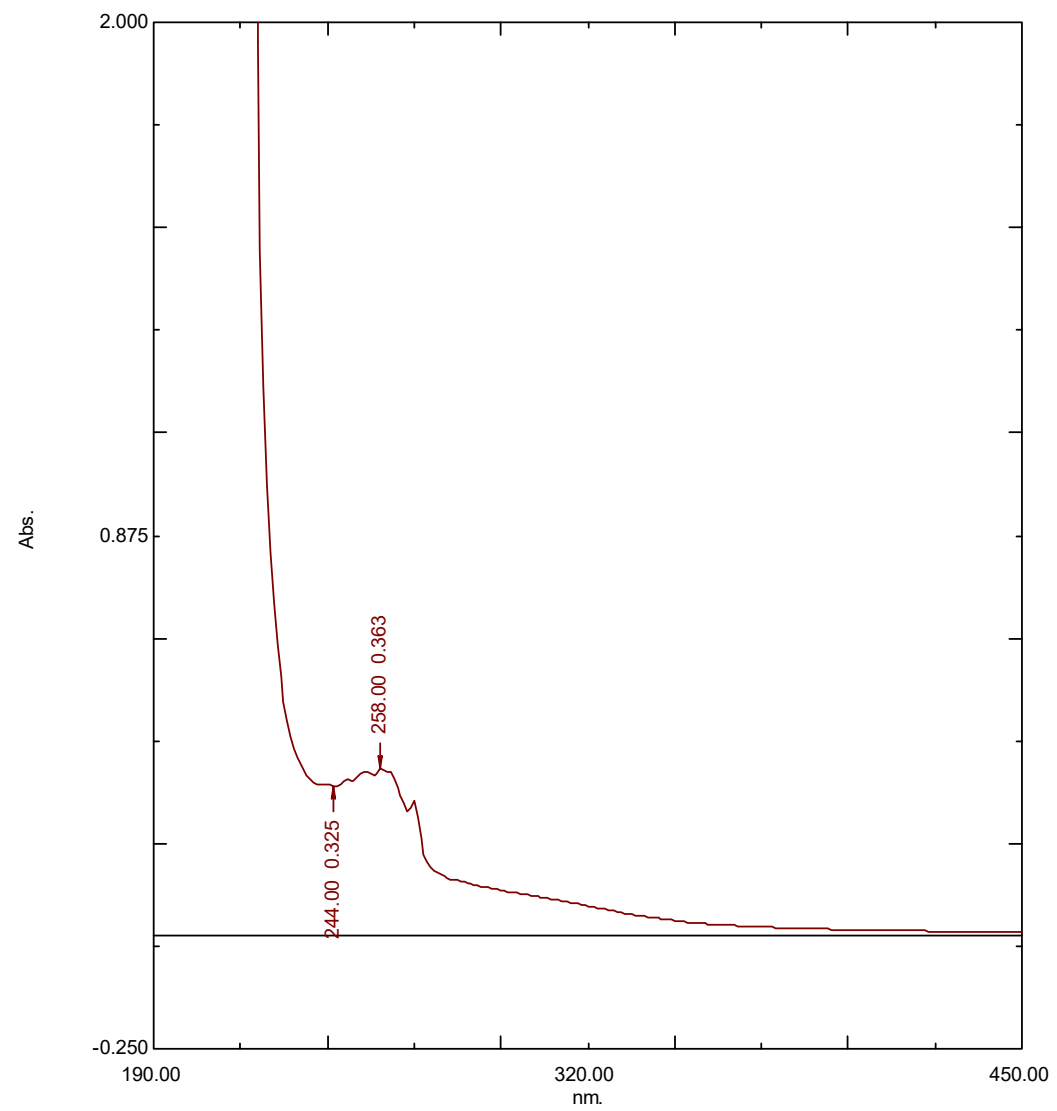

UV absorbance (MeCN,  $1.0 \times 10^{-4} \text{M}$ ) **31**

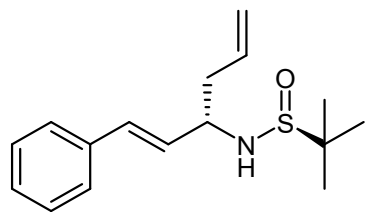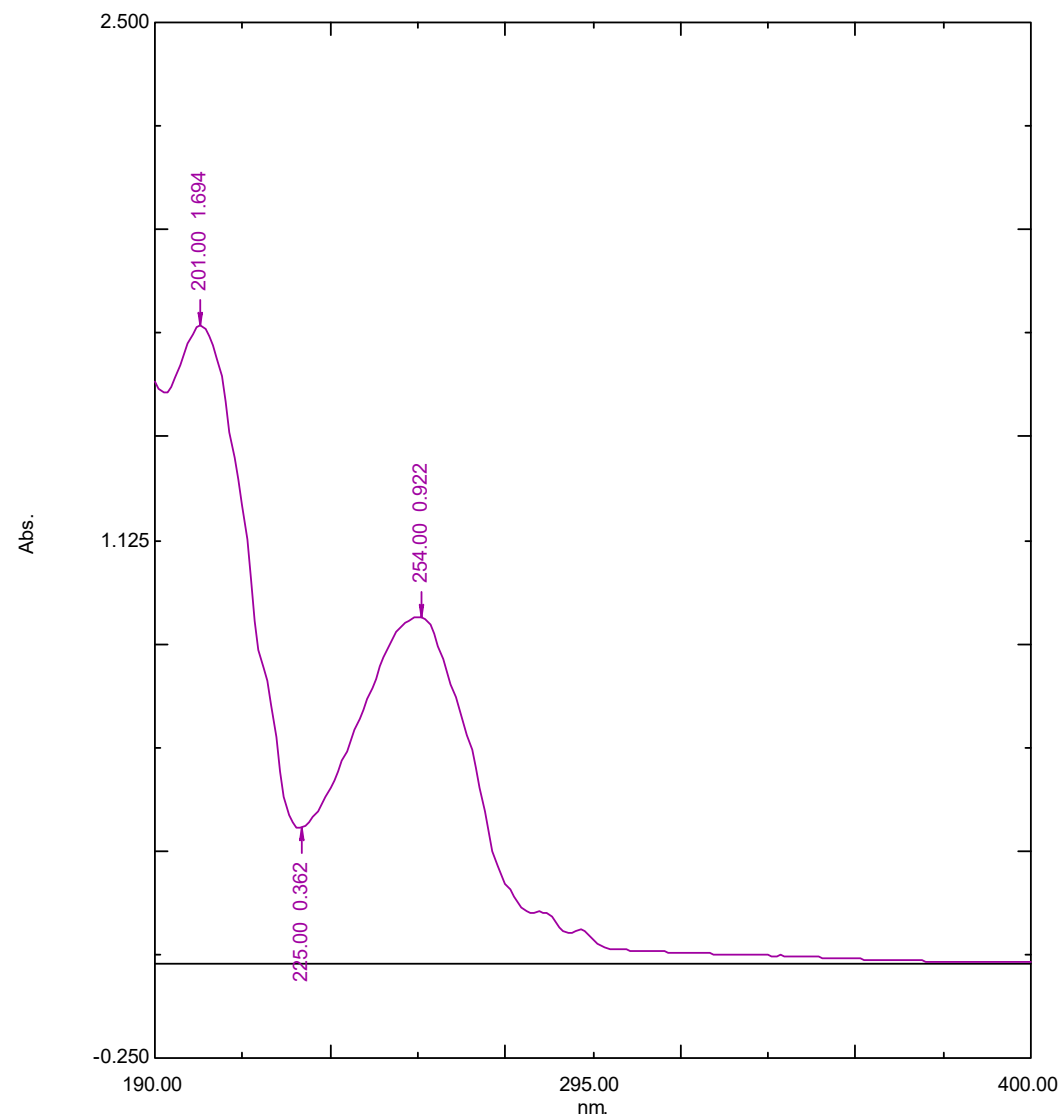

UV absorbance (MeCN,  $1.0 \times 10^{-4} \text{M}$ ) **3m**

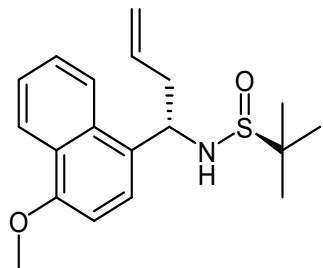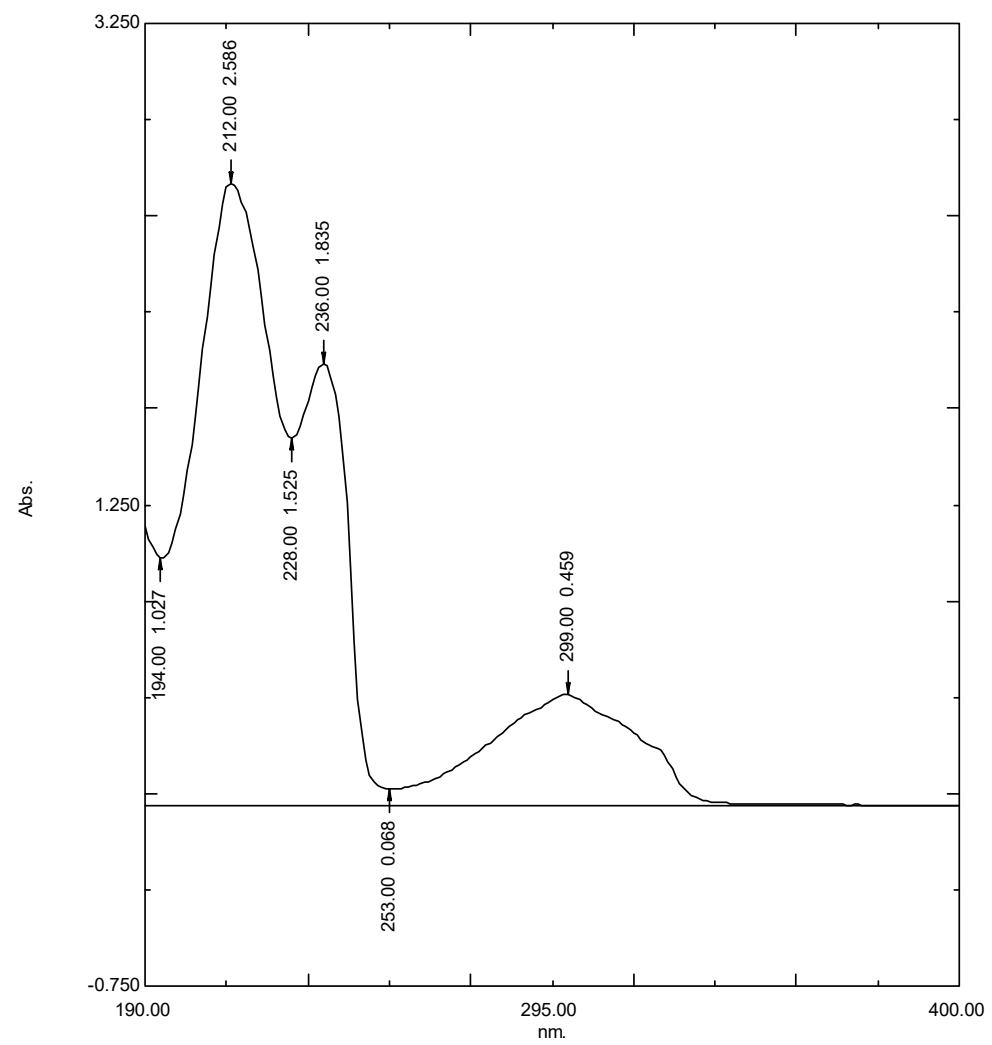

UV absorbance (MeCN,  $1.0 \times 10^{-4} \text{M}$ ) **3s**

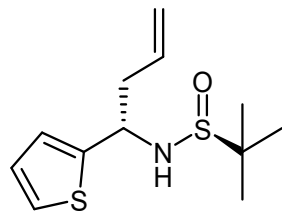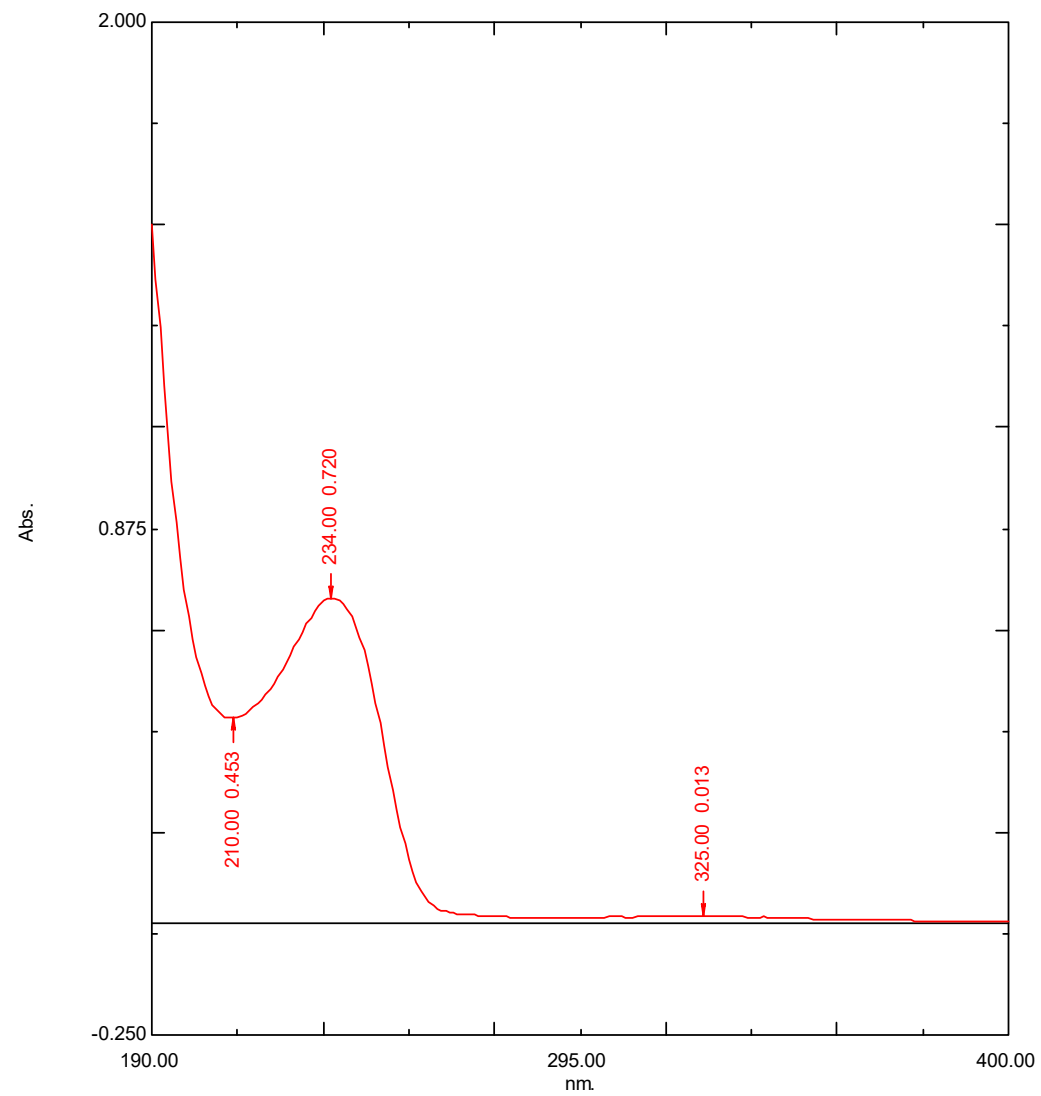



UV absorbance (MeCN,  $1.0 \times 10^{-4} \text{M}$ ) **3o**

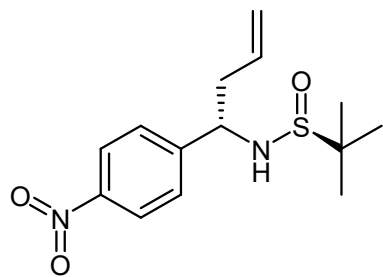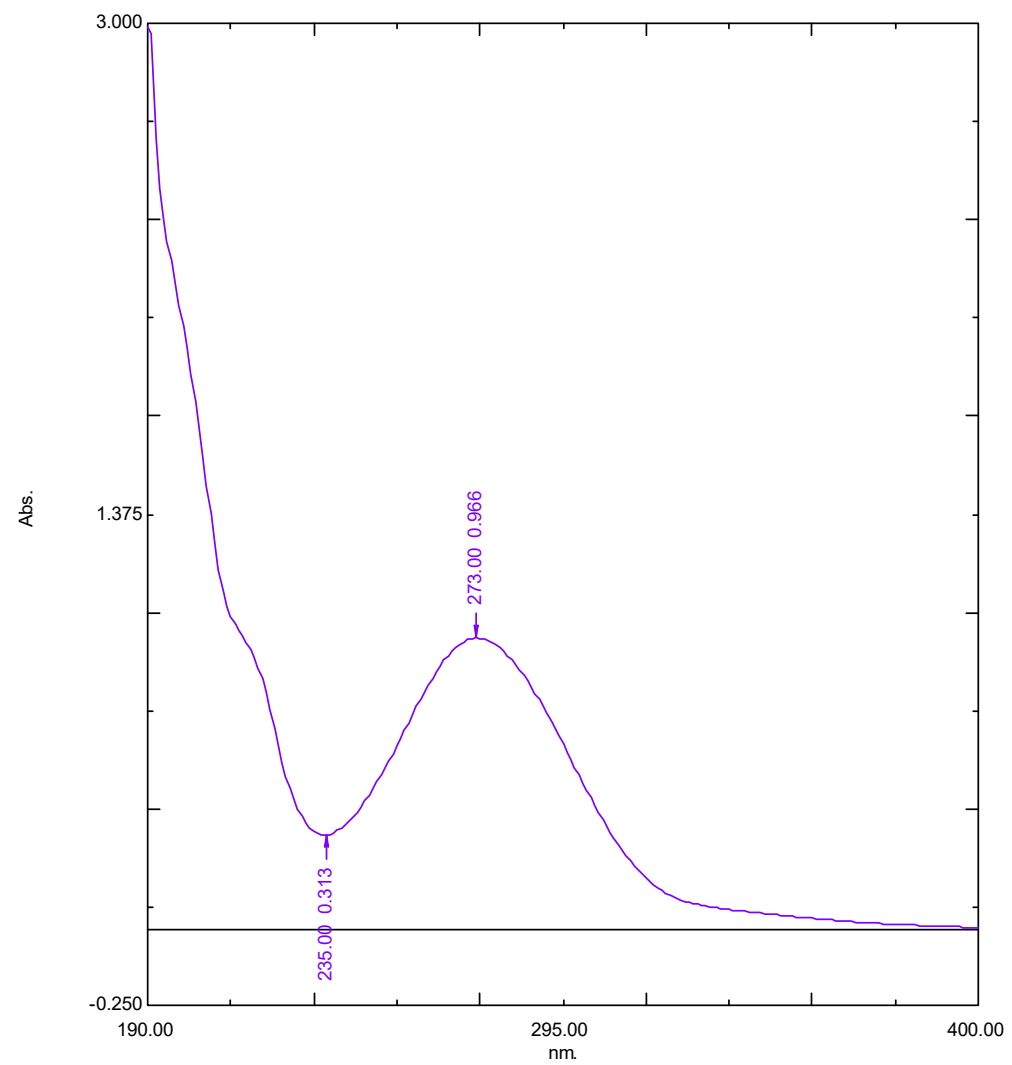

UV absorbance (MeCN,  $1.0 \times 10^{-4} \text{M}$ ) **3p**

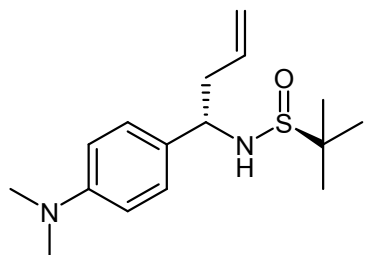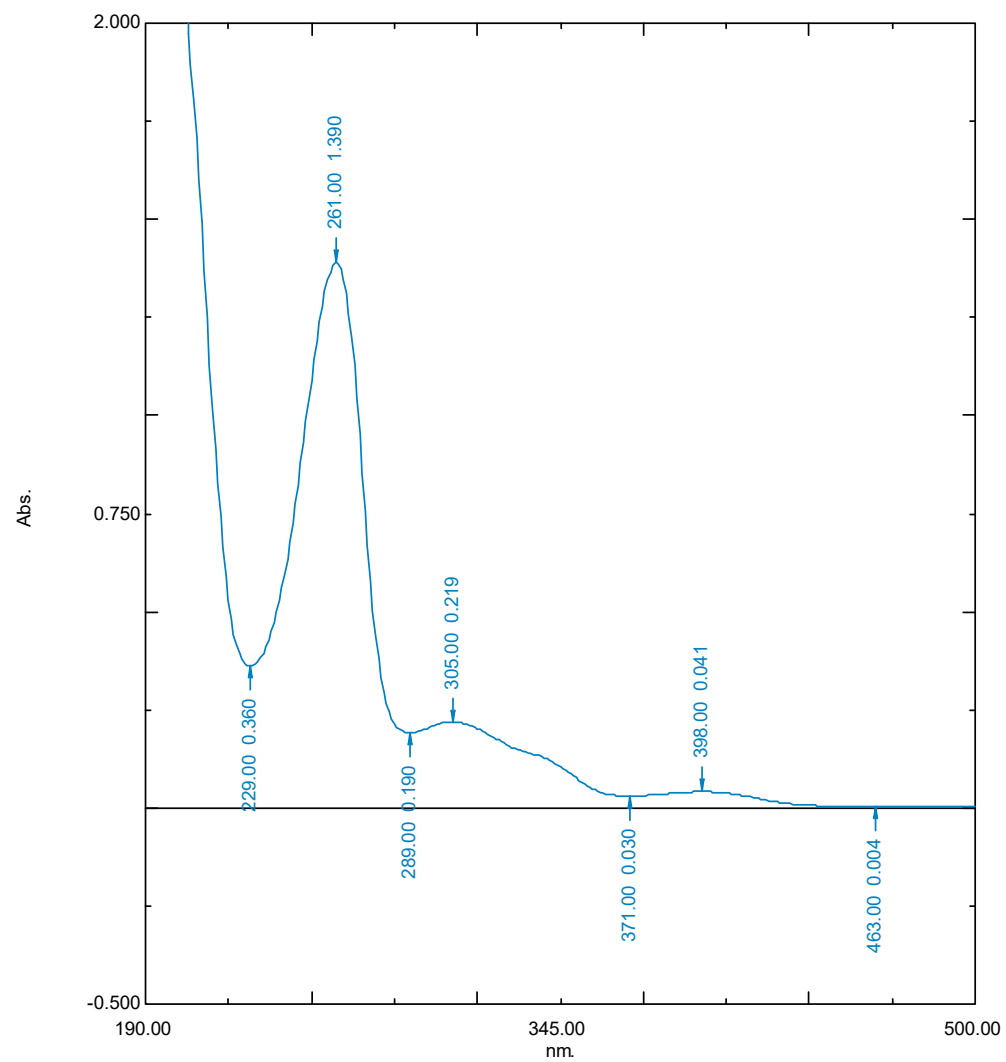

UV absorbance (MeCN,  $1.0 \times 10^{-4} \text{M}$ ) **3q**

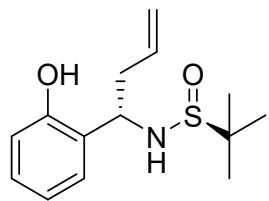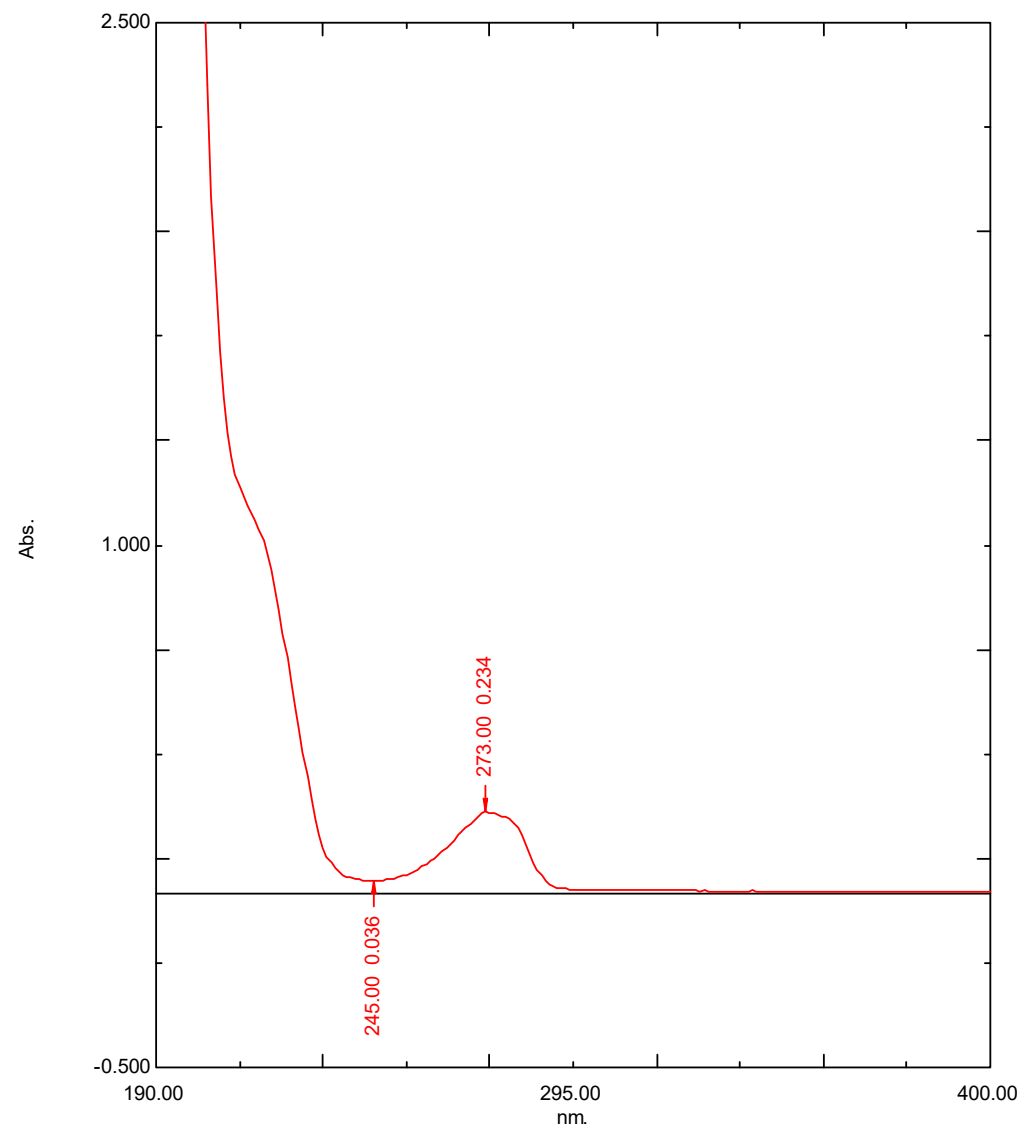

UV absorbance (MeCN,  $1.0 \times 10^{-3} \text{M}$ ) **3r**

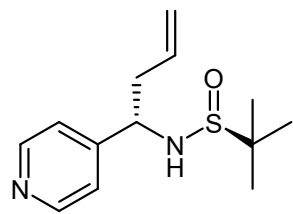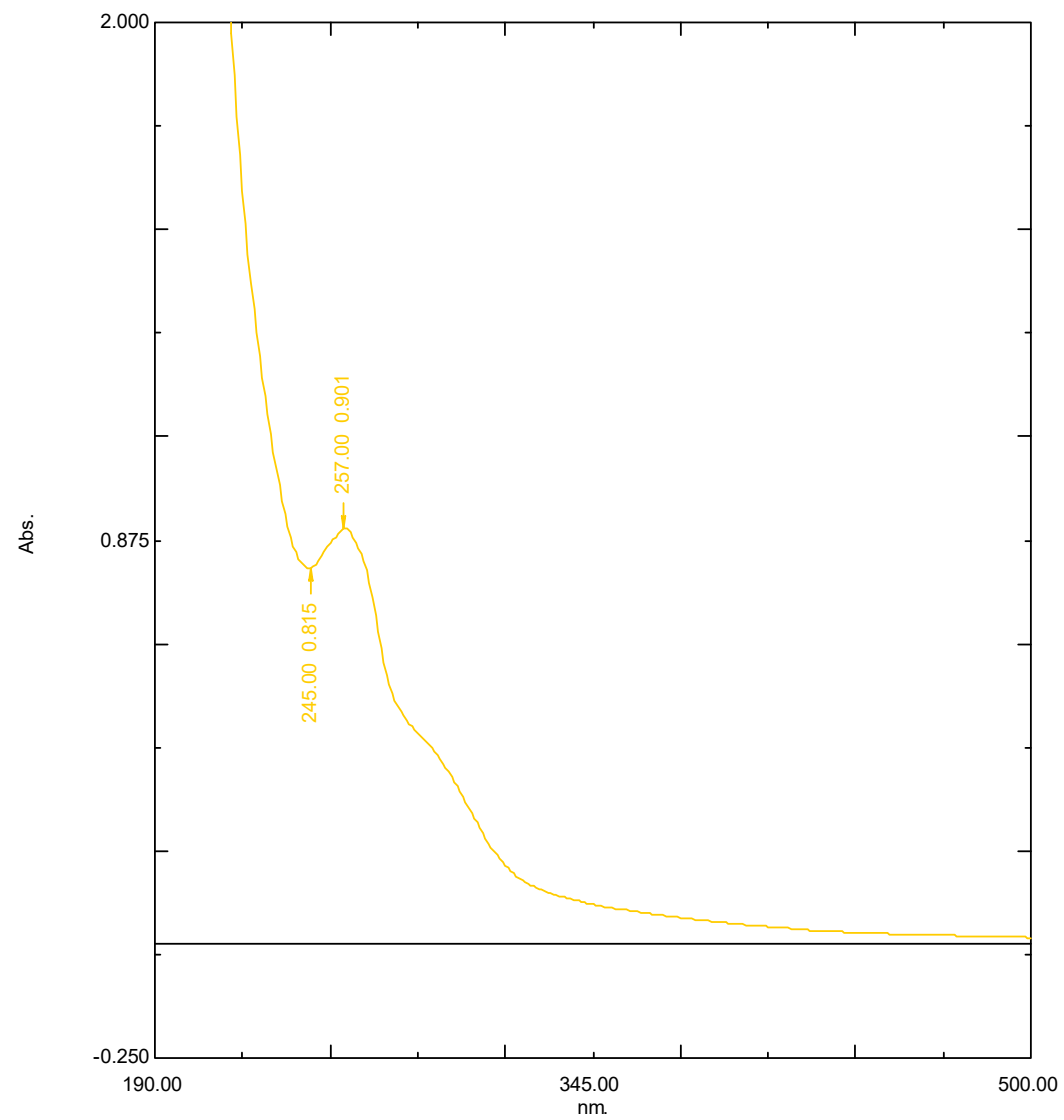

UV absorbance (MeCN,  $1.0 \times 10^{-3} \text{M}$ ) **3s**

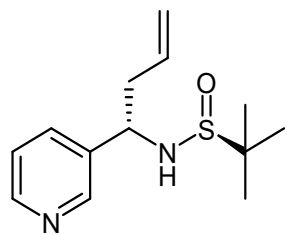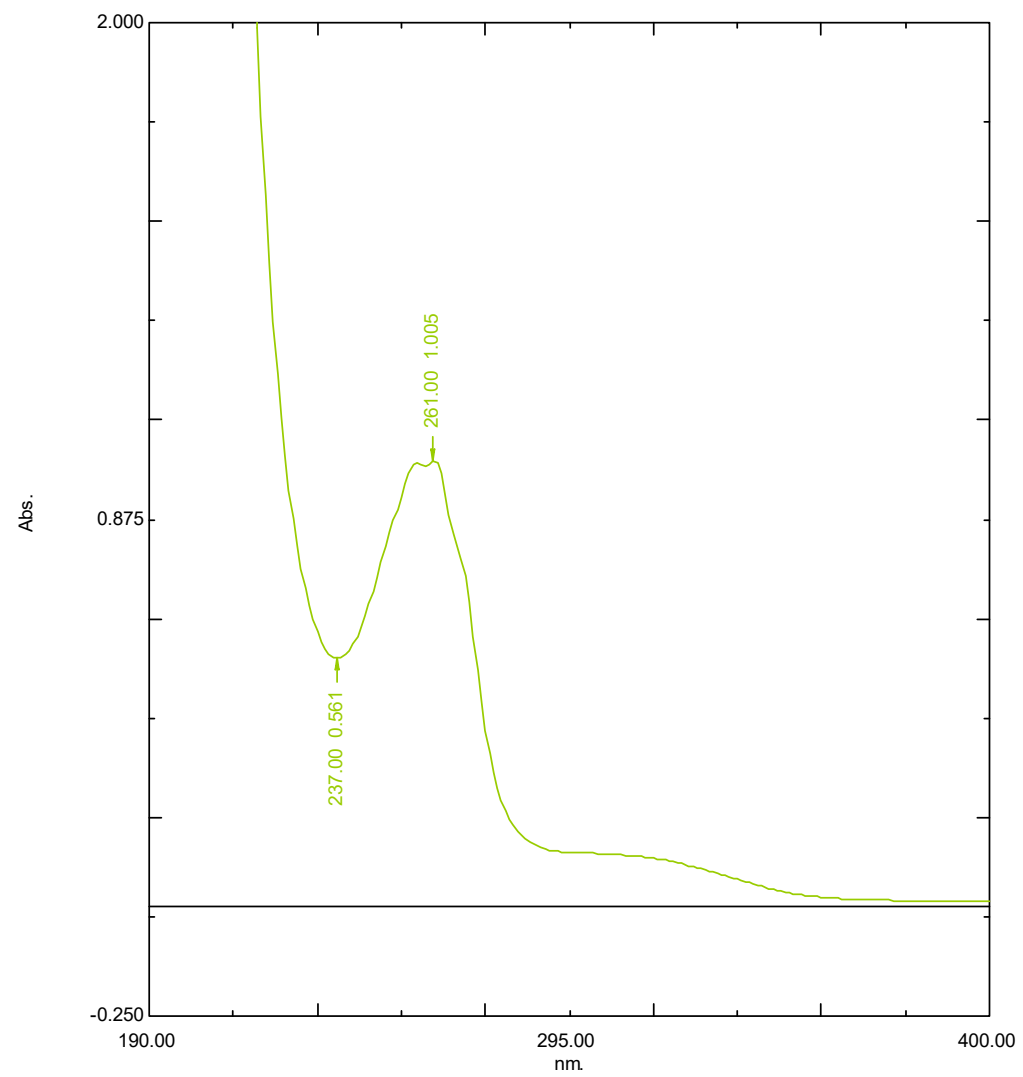

UV absorbance (MeCN,  $1.0 \times 10^{-3} \text{M}$ ) **3t**

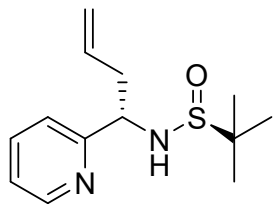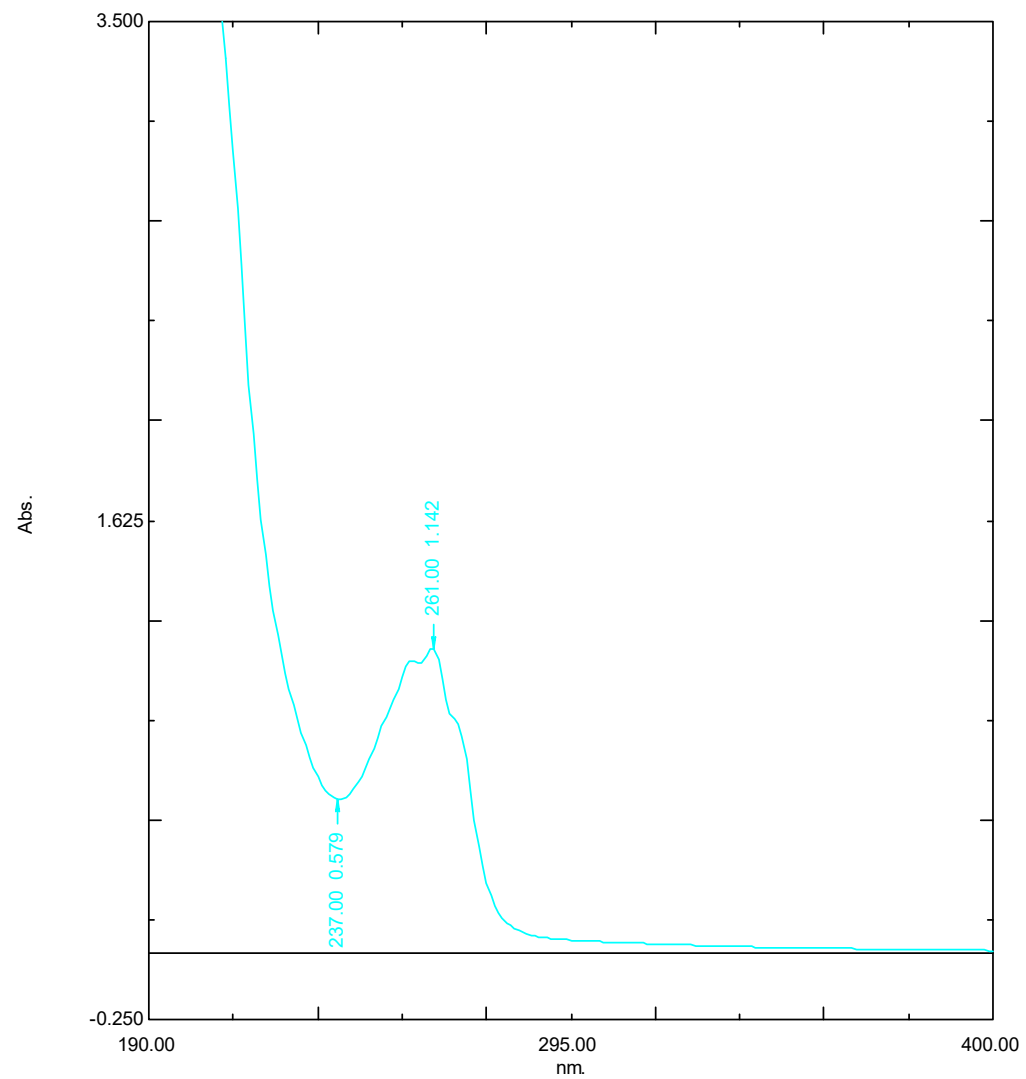

UV absorbance (MeCN,  $1.0 \times 10^{-4} \text{M}$ ) **3u**

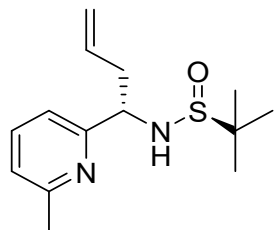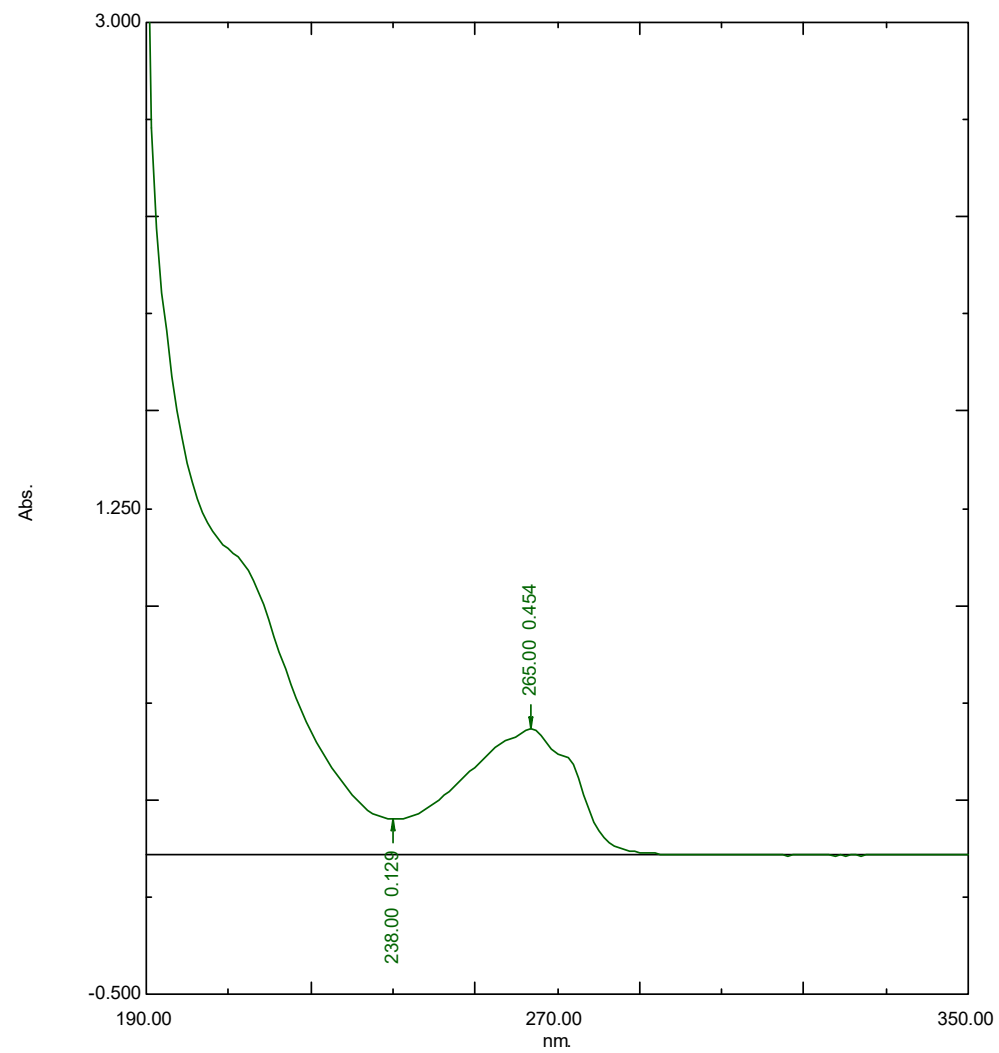

UV absorbance (MeCN,  $1.0 \times 10^{-4} \text{M}$ ) **3v**

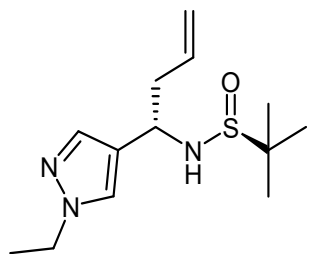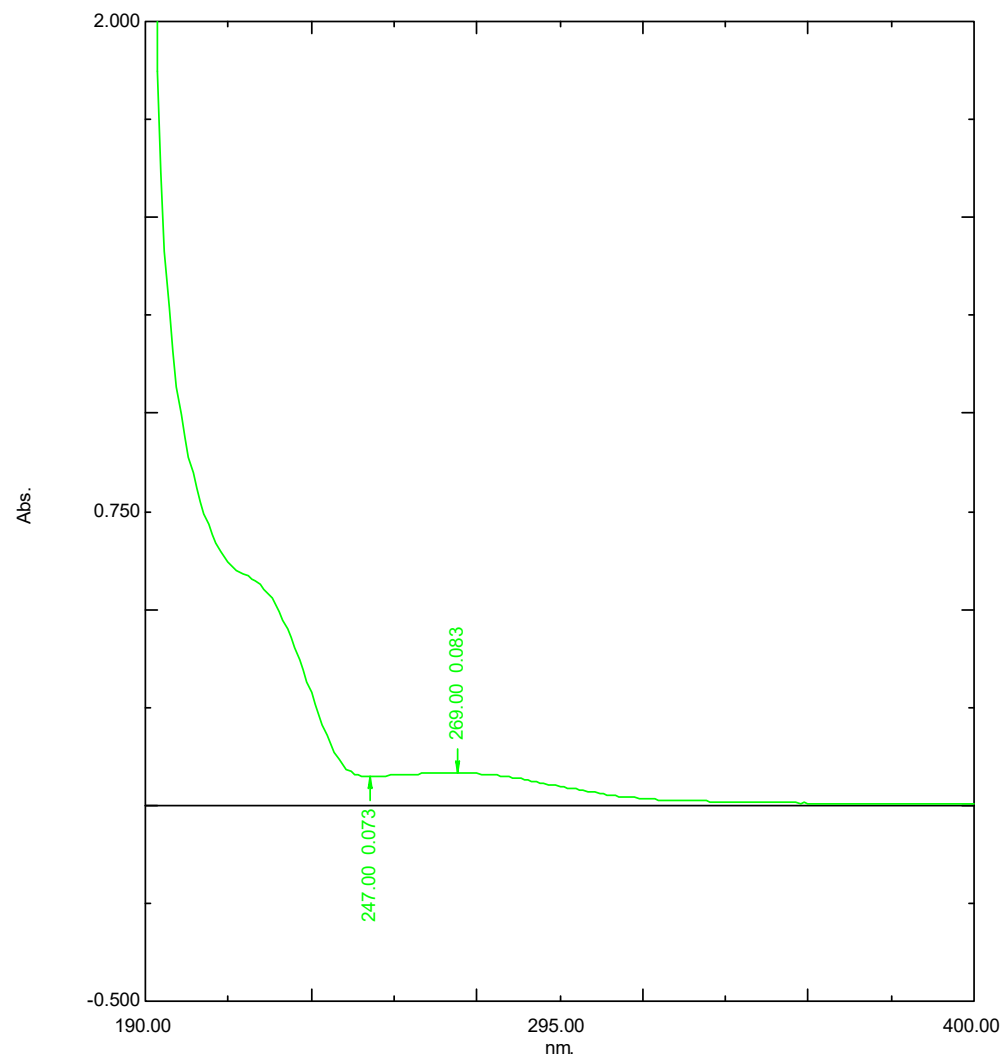



UV absorbance (MeCN,  $1.0 \times 10^{-4} \text{M}$ ) **3w**

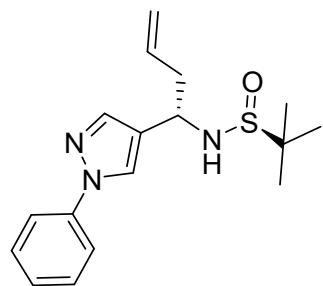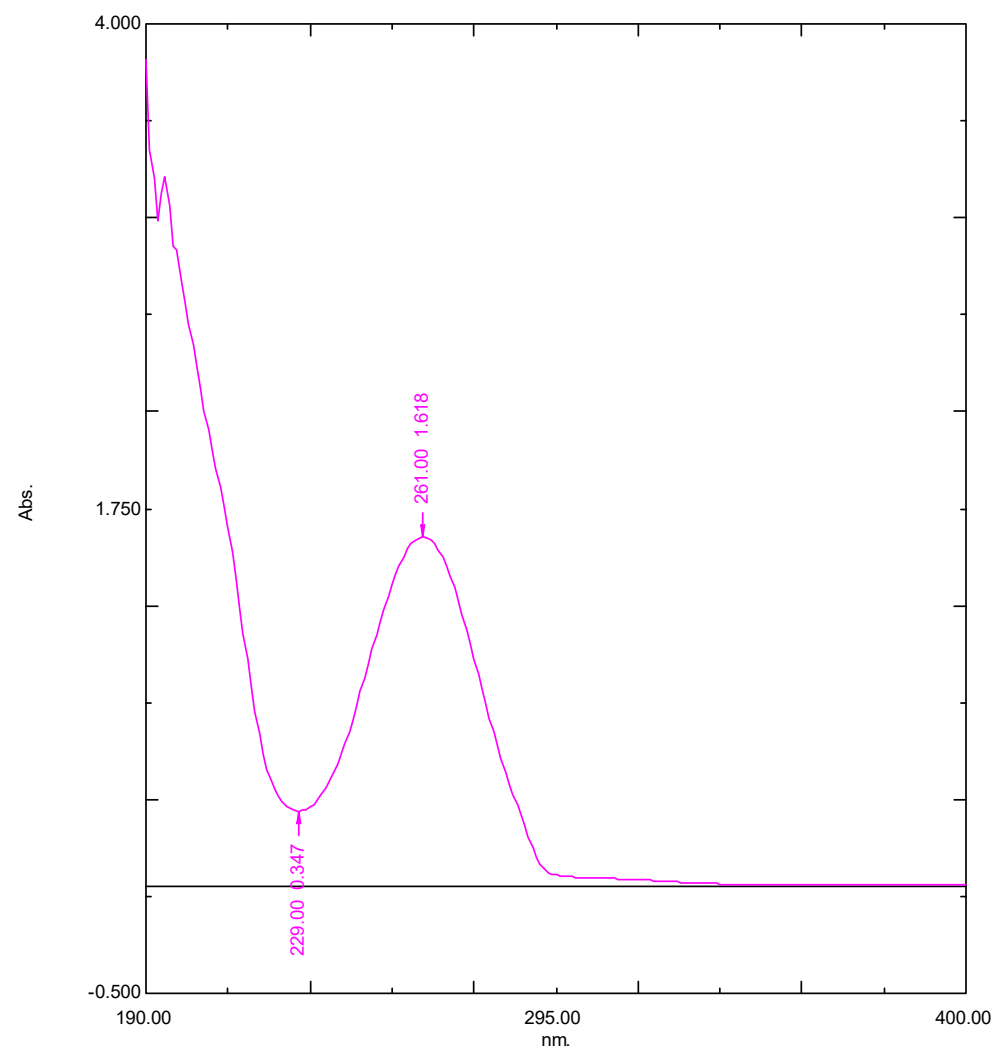

UV absorbance (MeCN,  $1.0 \times 10^{-3} \text{M}$ ) **6a**

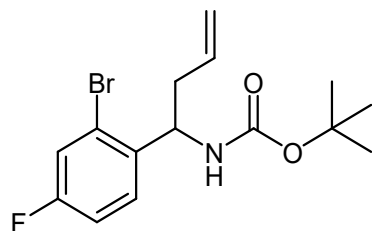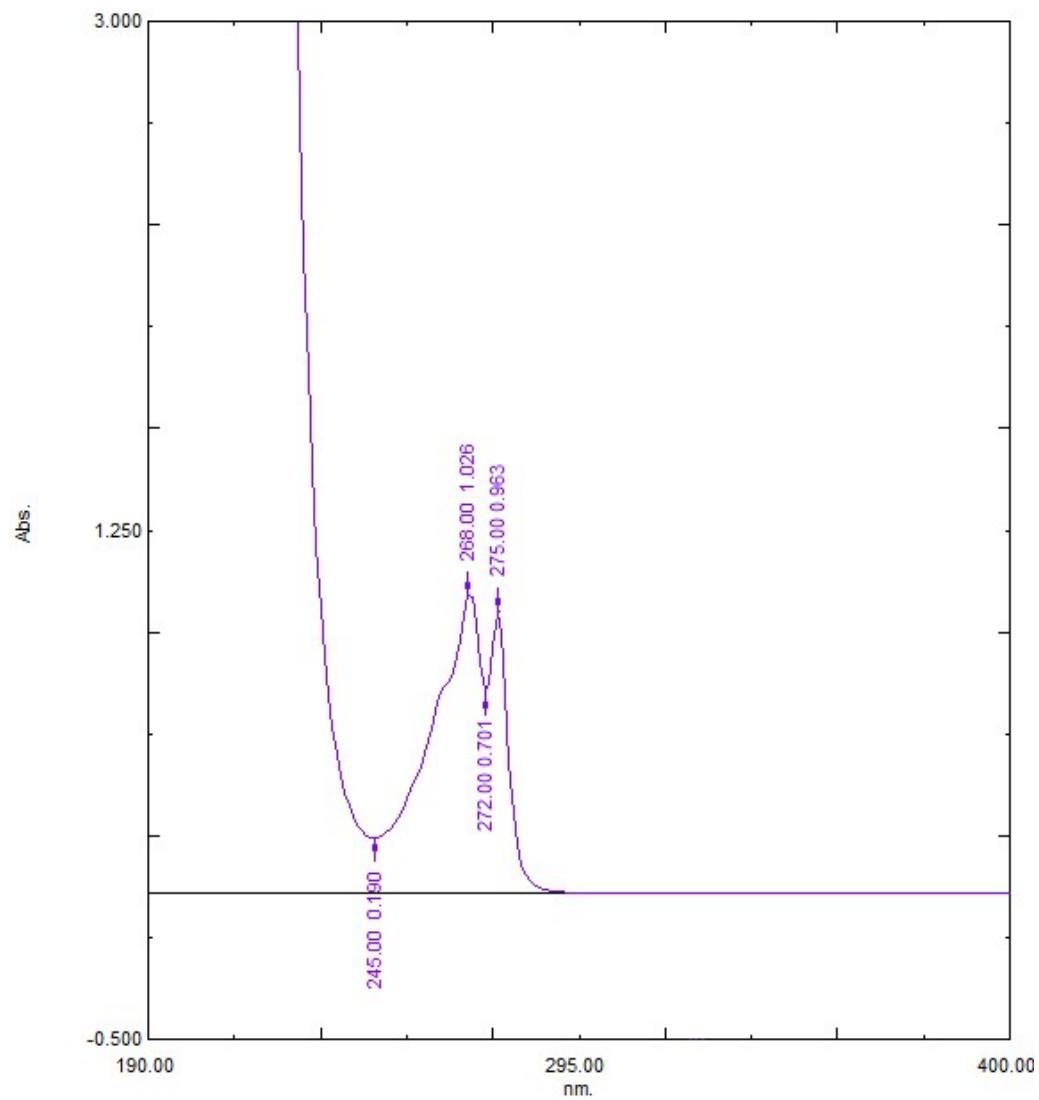

UV absorbance (MeCN,  $1.0 \times 10^{-3} \text{M}$ ) **6b**

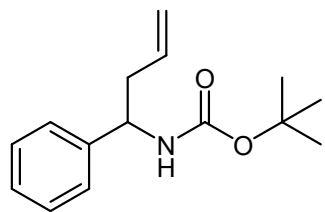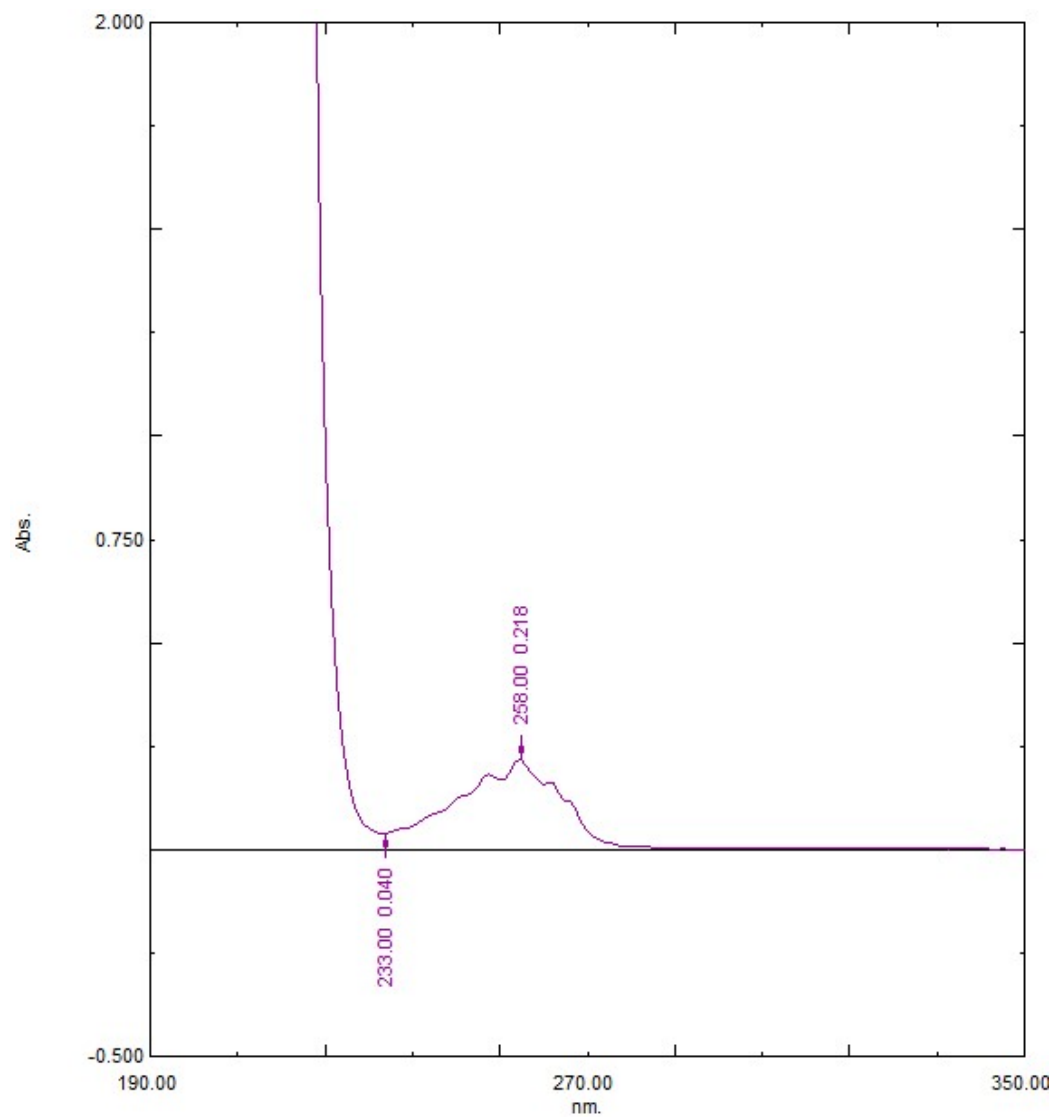

UV absorbance (MeCN,  $1.0 \times 10^{-3} \text{M}$ ) **6c**

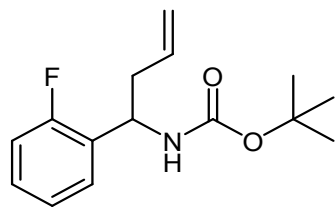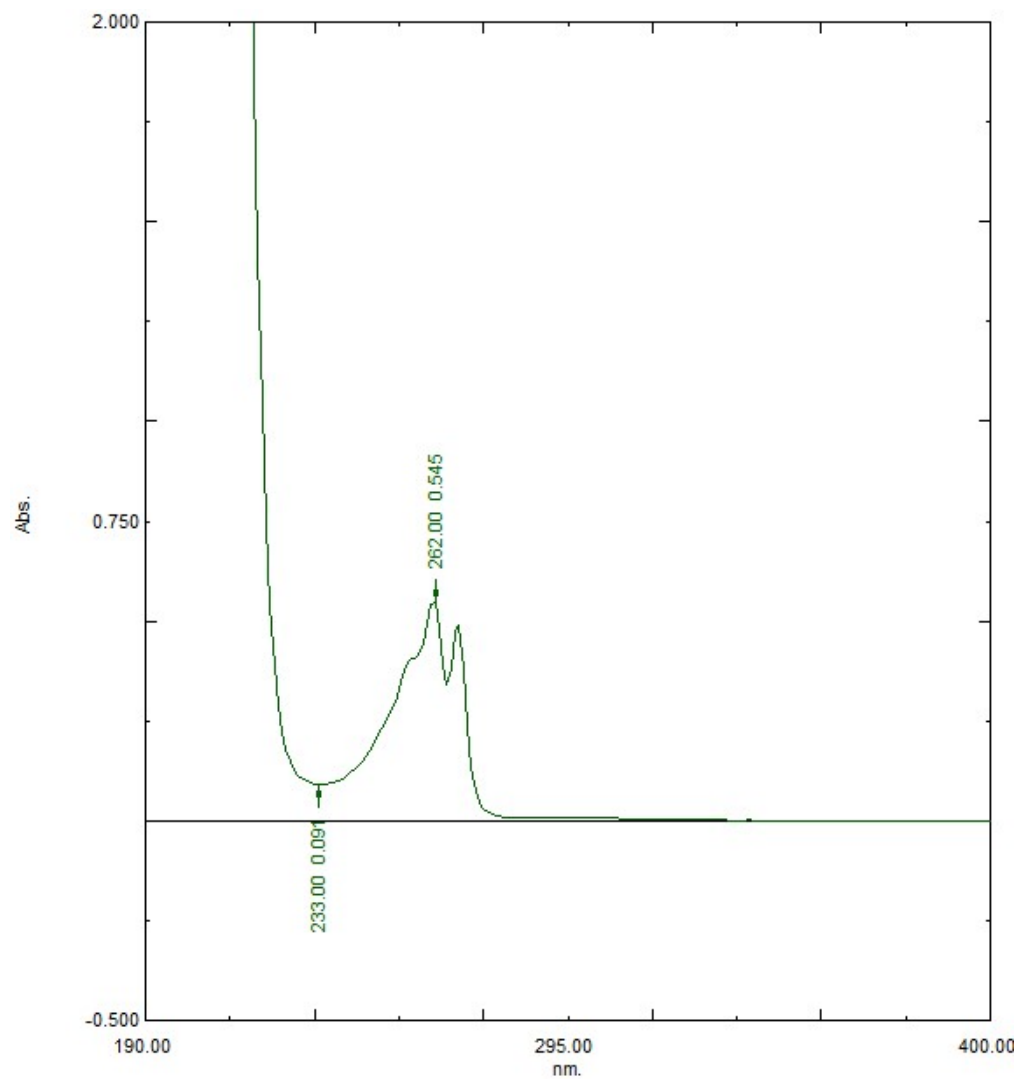

UV absorbance (MeCN,  $1.0 \times 10^{-4} \text{M}$ ) **6d**

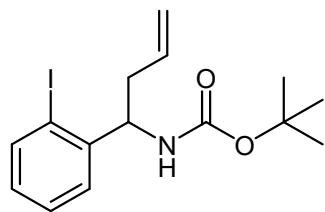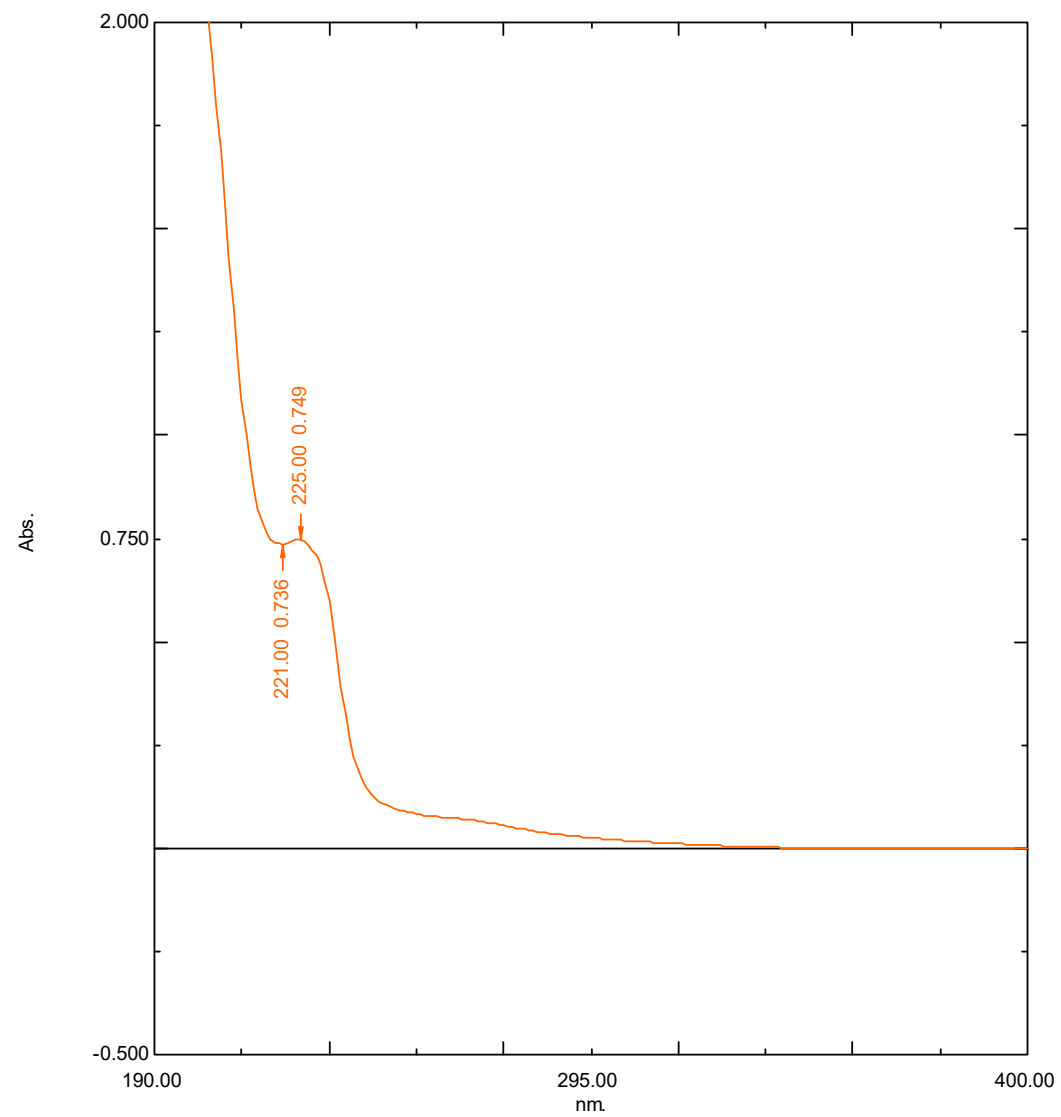

UV absorbance (MeCN,  $1.0 \times 10^{-3} \text{M}$ ) **6e**

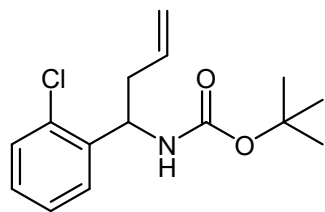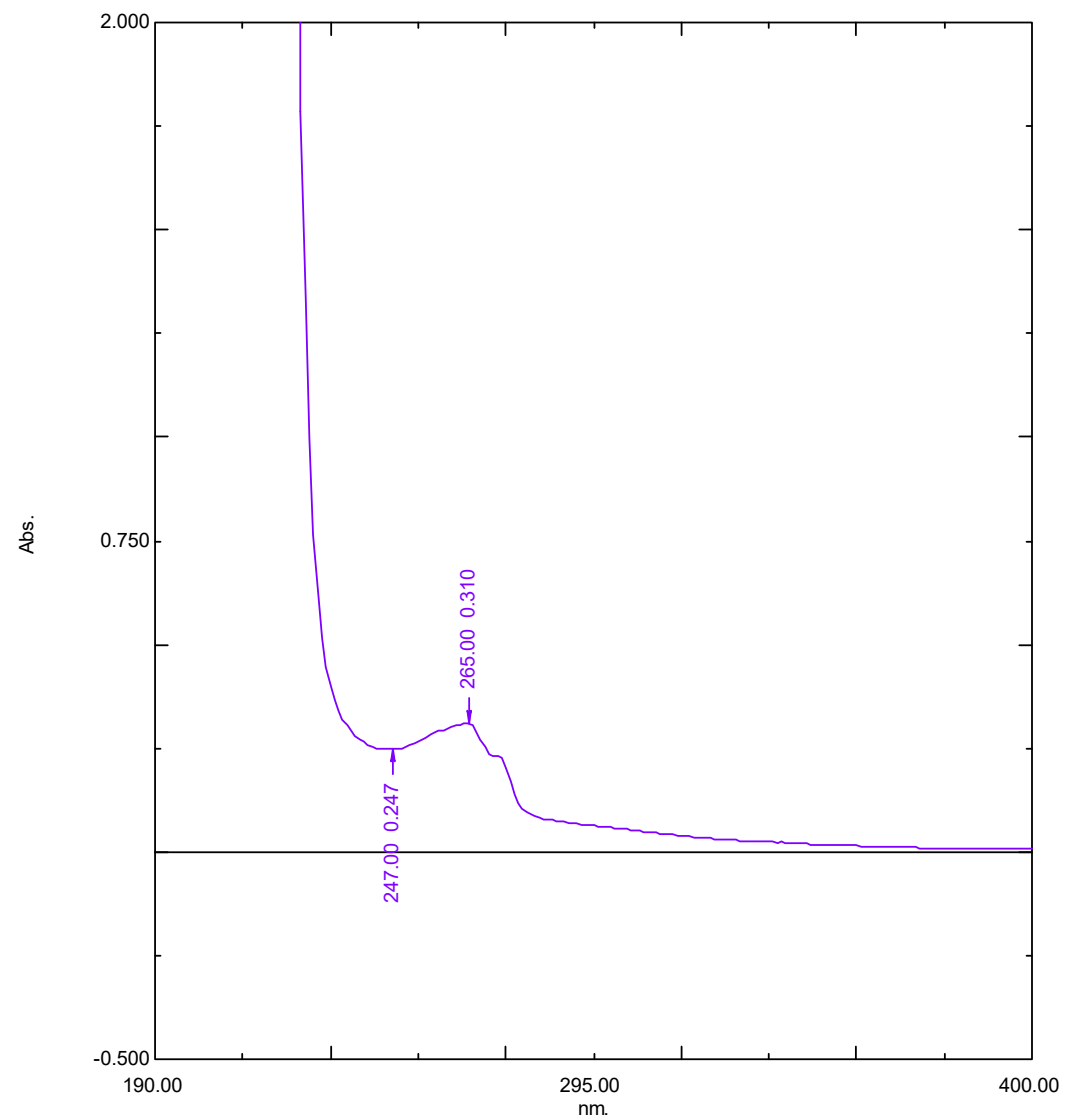

UV absorbance (MeCN,  $1.0 \times 10^{-3} \text{M}$ ) **6f**

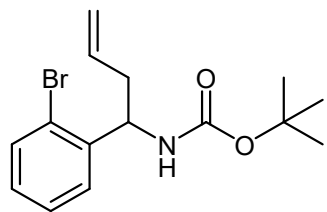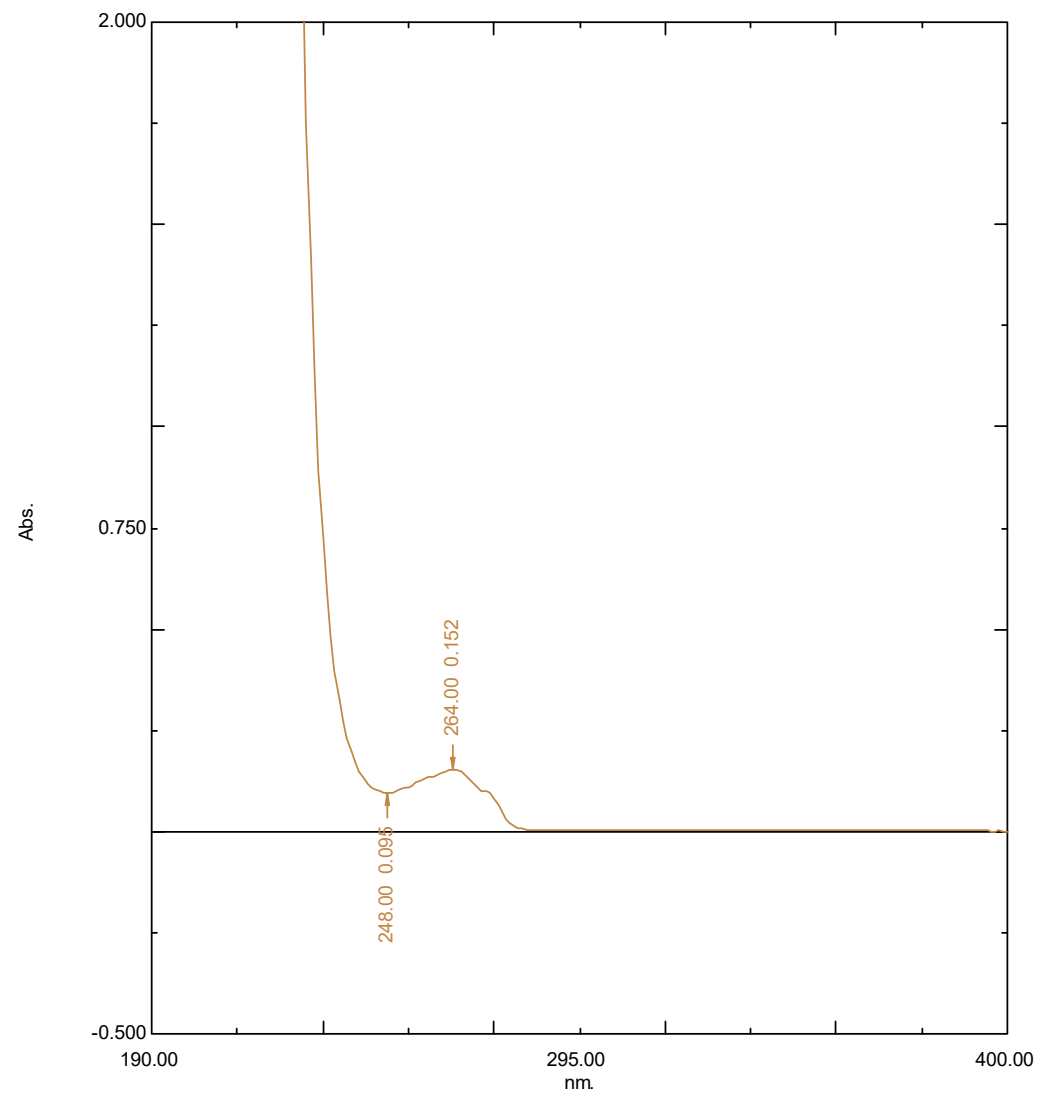

UV absorbance (MeCN,  $1.0 \times 10^{-3} \text{M}$ ) **6g**

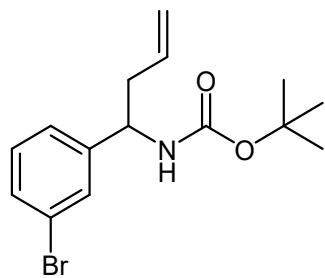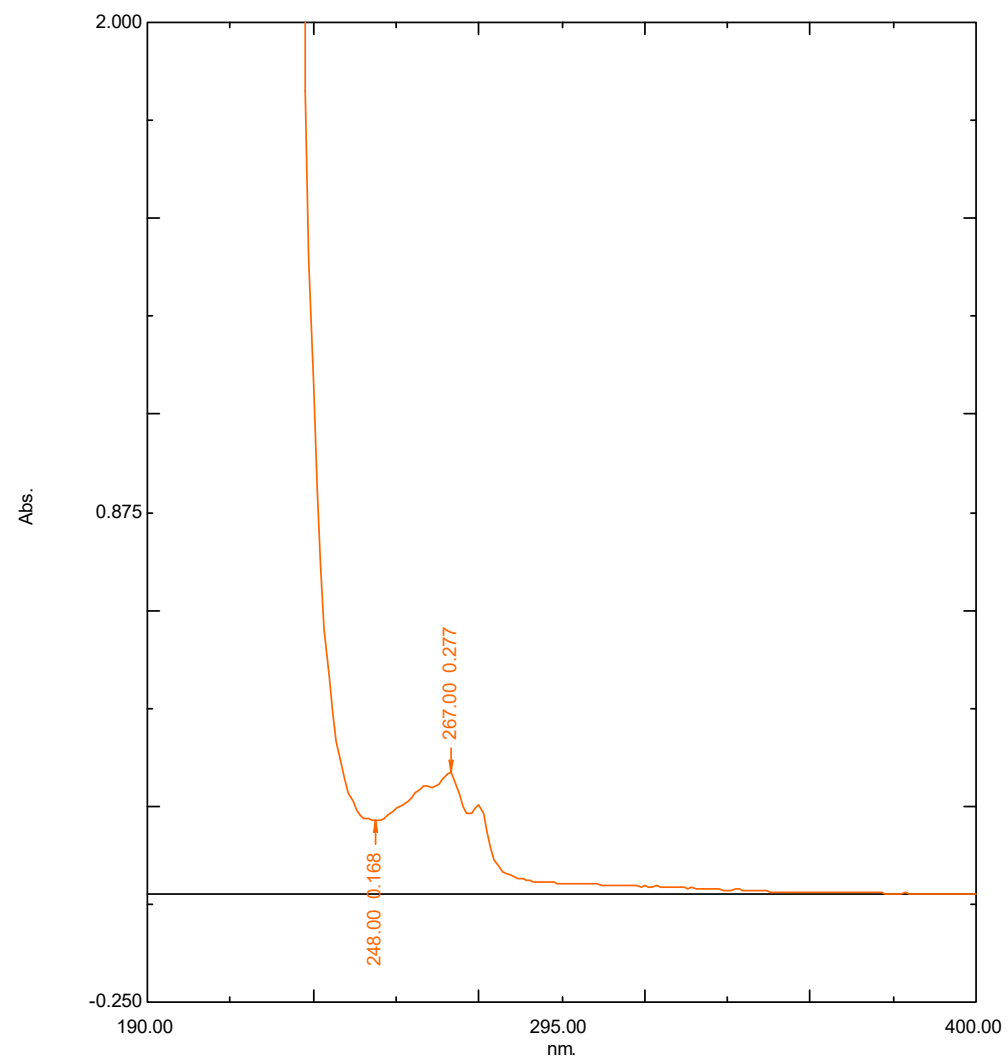



UV absorbance (MeCN,  $1.0 \times 10^{-3} \text{M}$ ) **6h**

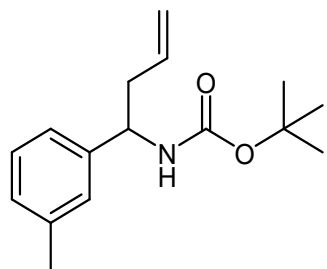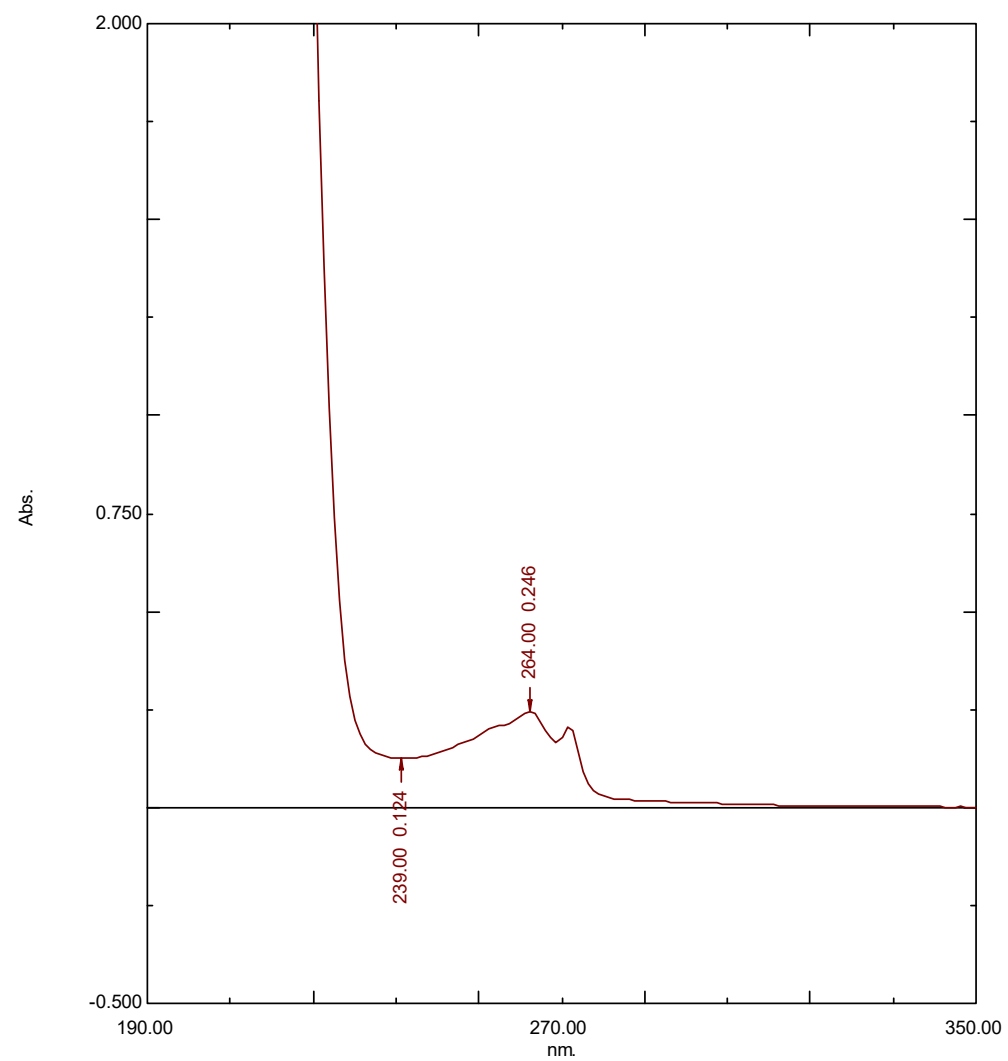

UV absorbance (MeCN,  $1.0 \times 10^{-4} \text{M}$ ) **6i**

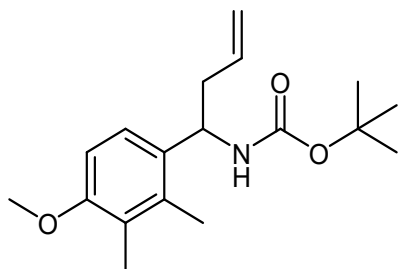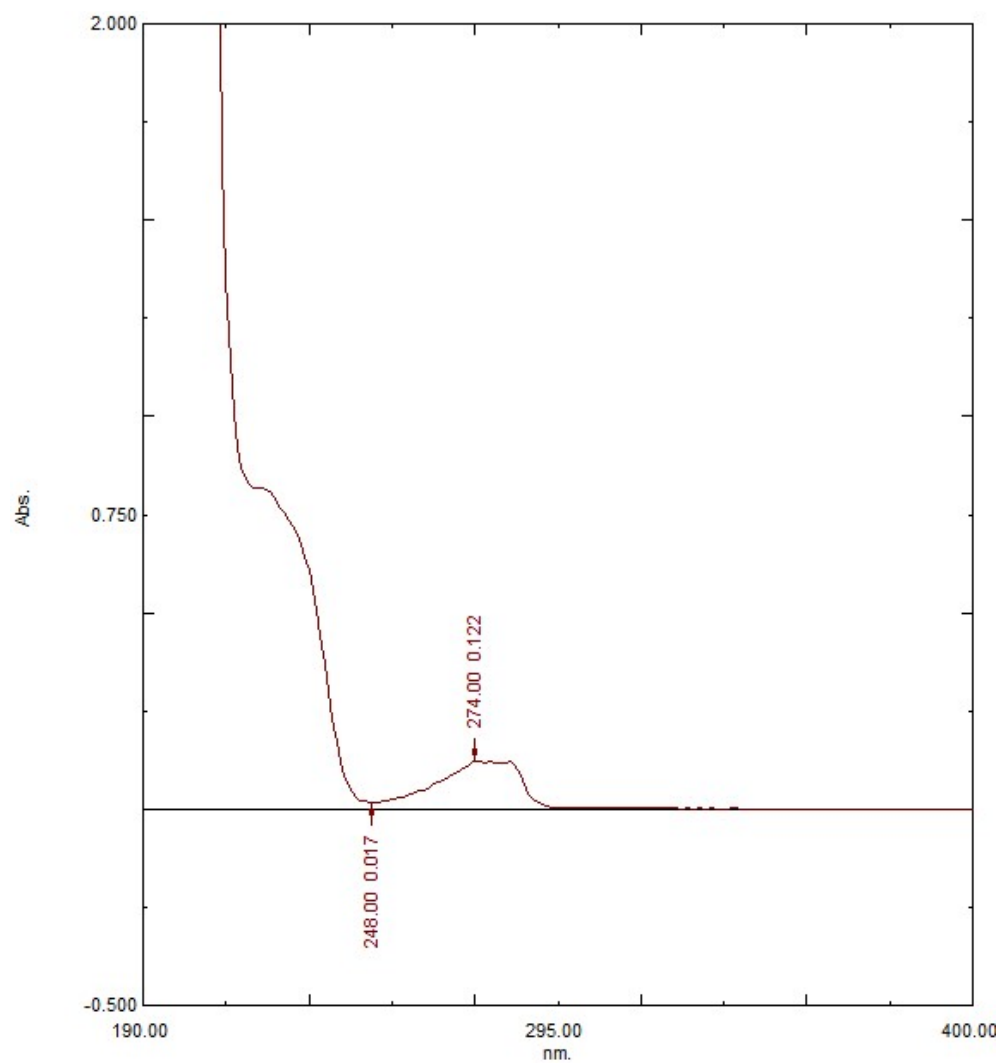

UV absorbance (MeCN,  $1.0 \times 10^{-3} \text{M}$ ) **6j**

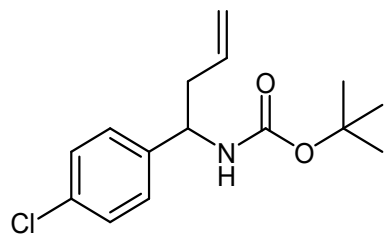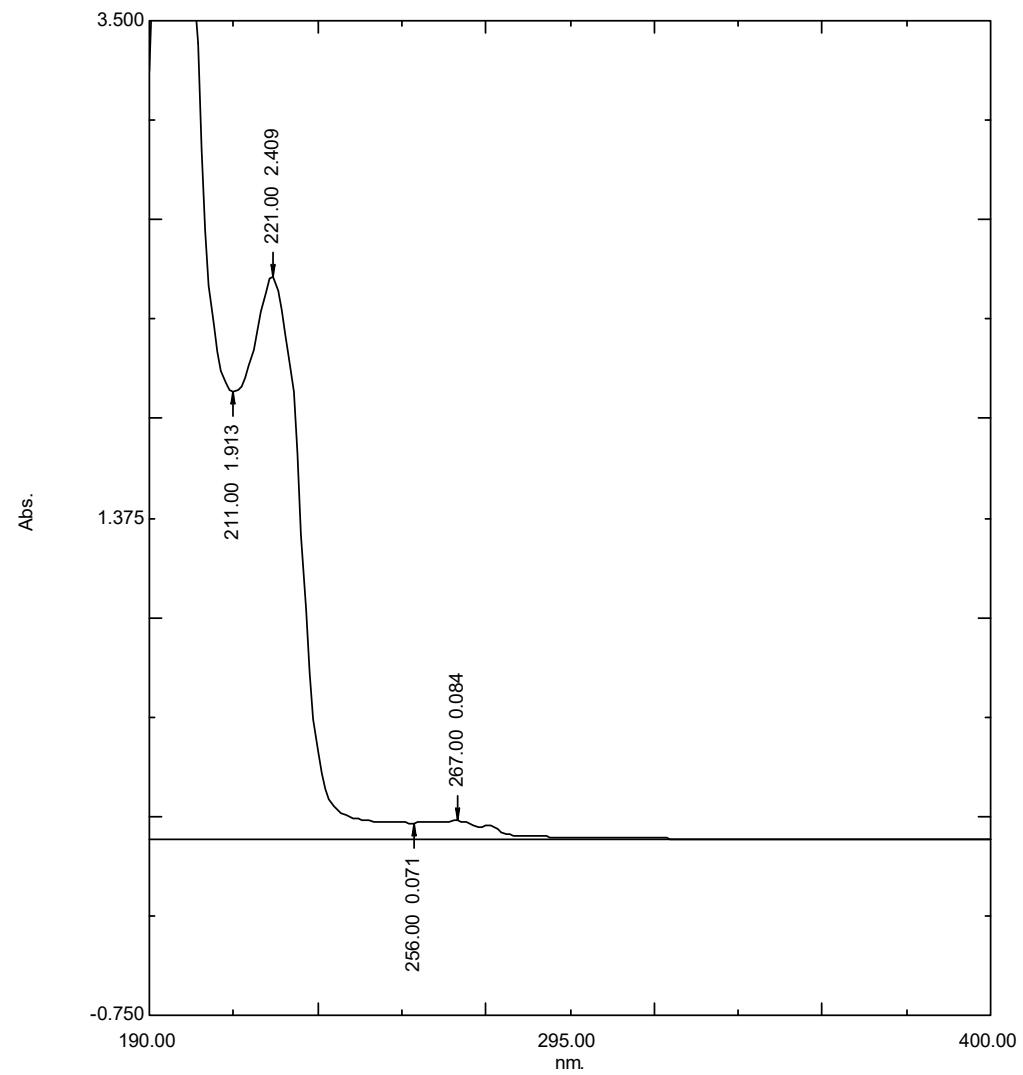

UV absorbance (MeCN,  $1.0 \times 10^{-3} \text{M}$ ) **6k**

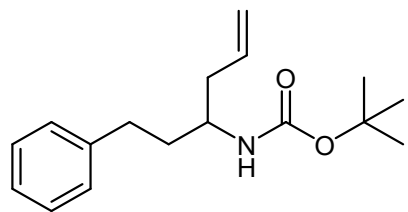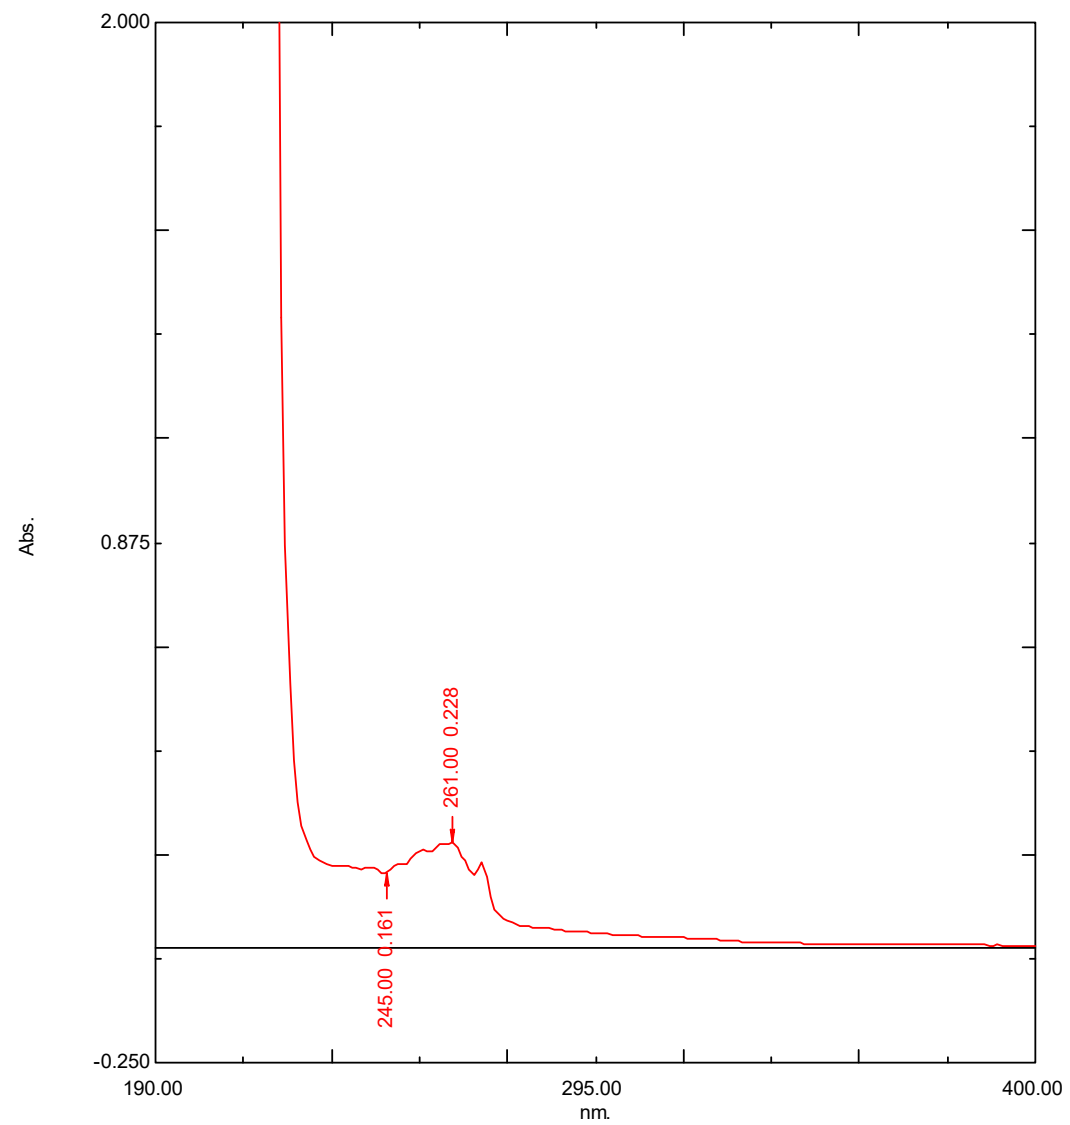

UV absorbance (MeCN,  $1.0 \times 10^{-4} \text{M}$ ) **6l**

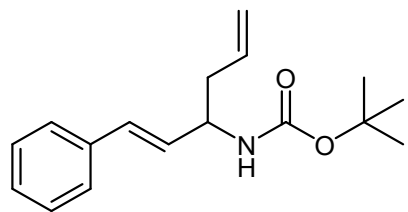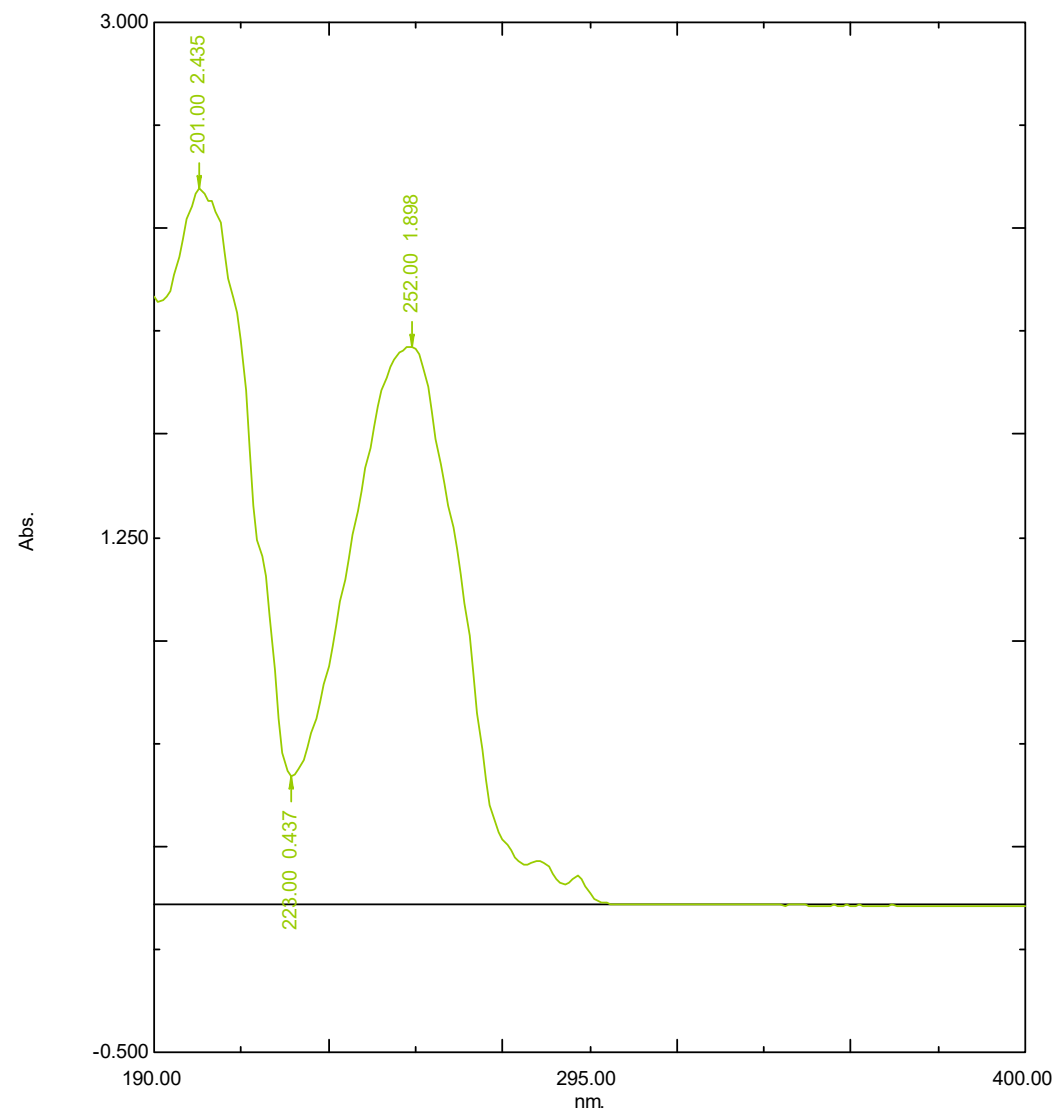

UV absorbance (MeCN,  $1.0 \times 10^{-4} \text{M}$ ) **6m**

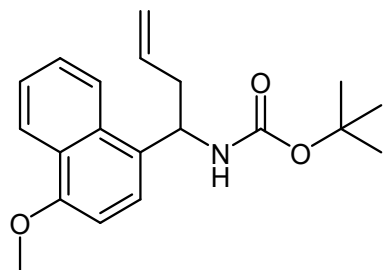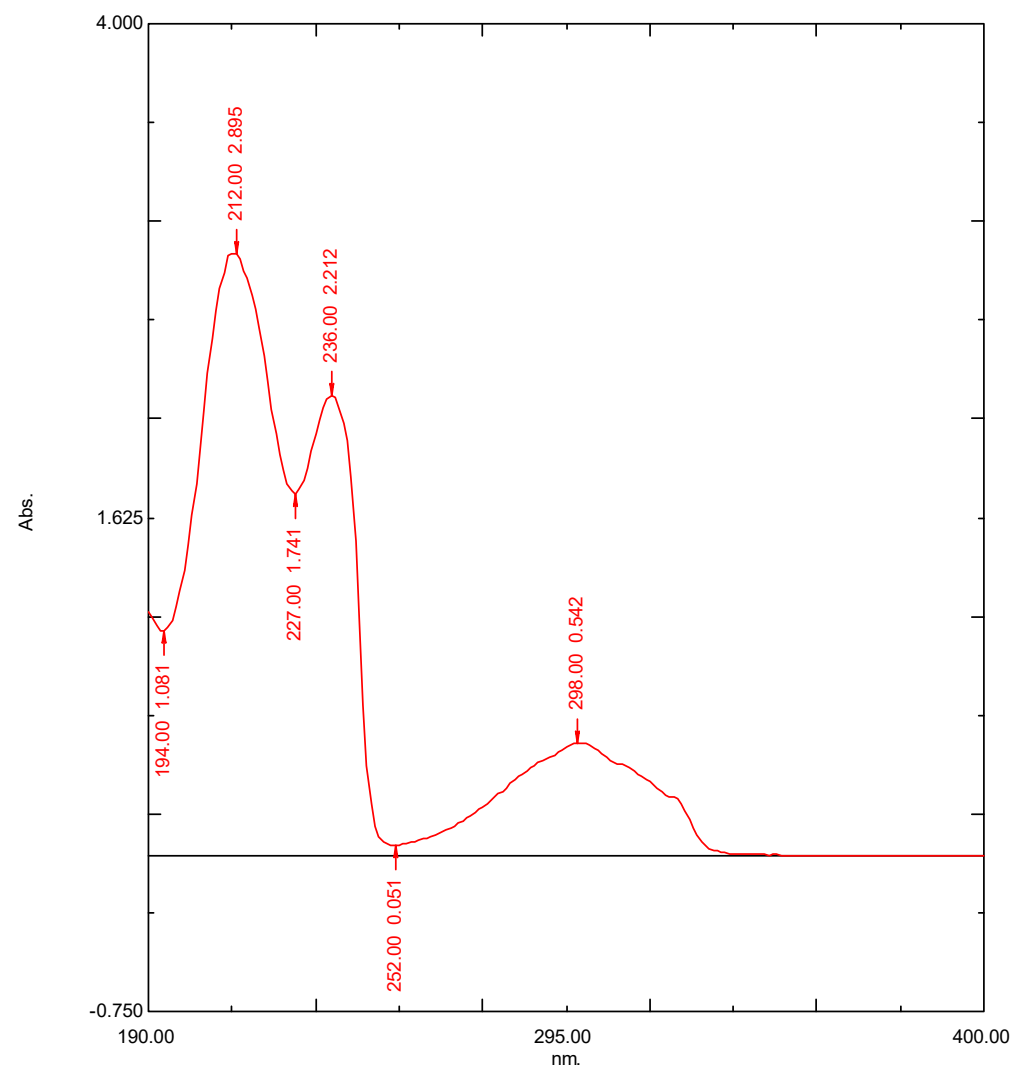

UV absorbance (MeCN,  $1.0 \times 10^{-4} \text{M}$ ) **6n**

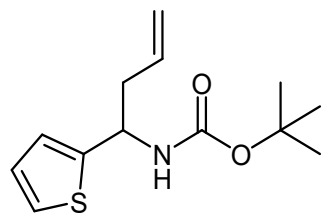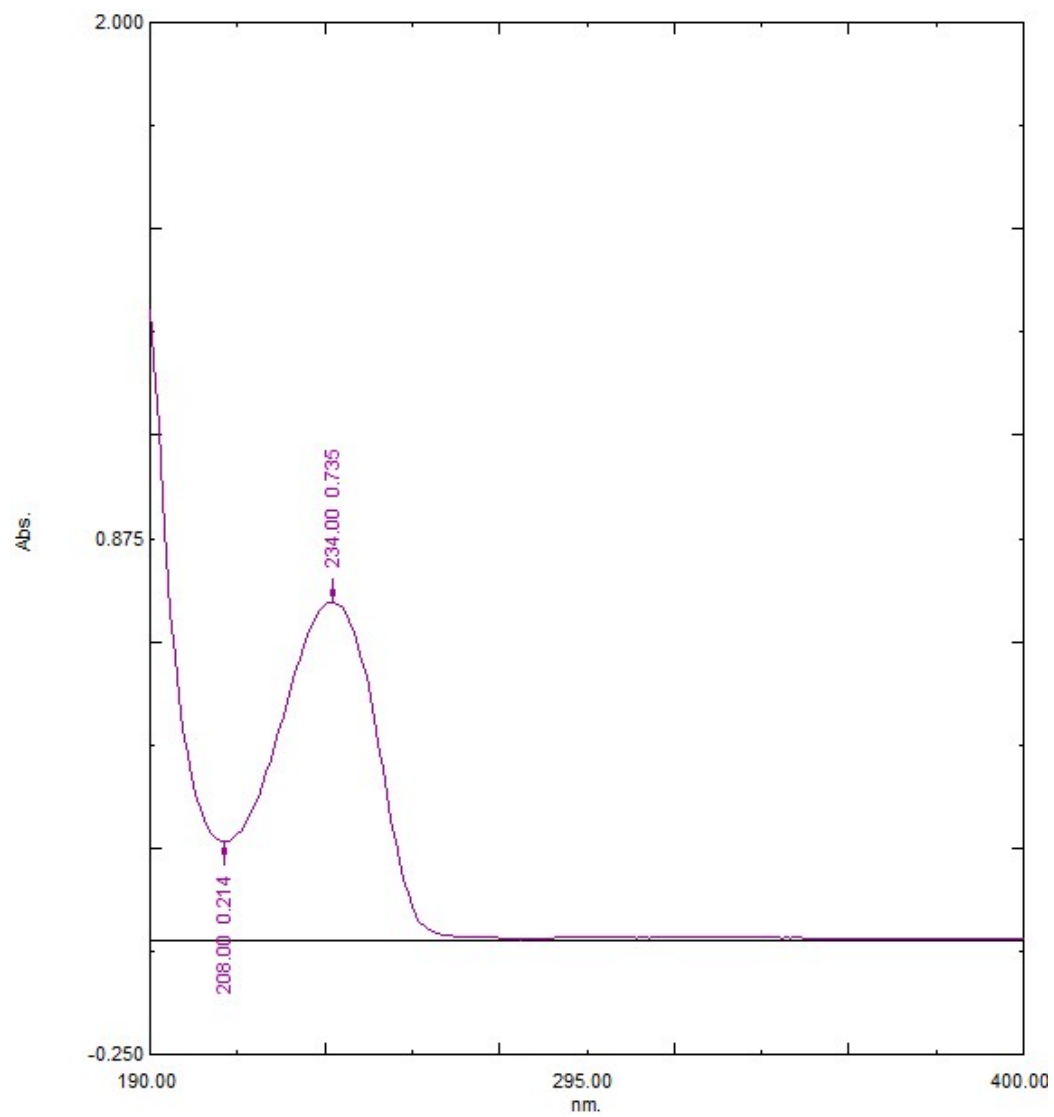

UV absorbance (MeCN,  $1.0 \times 10^{-4} \text{M}$ ) **6o**

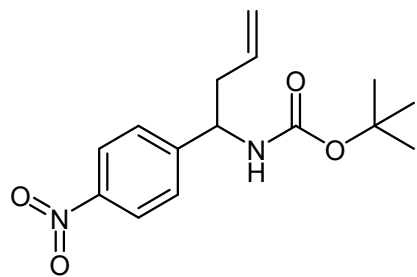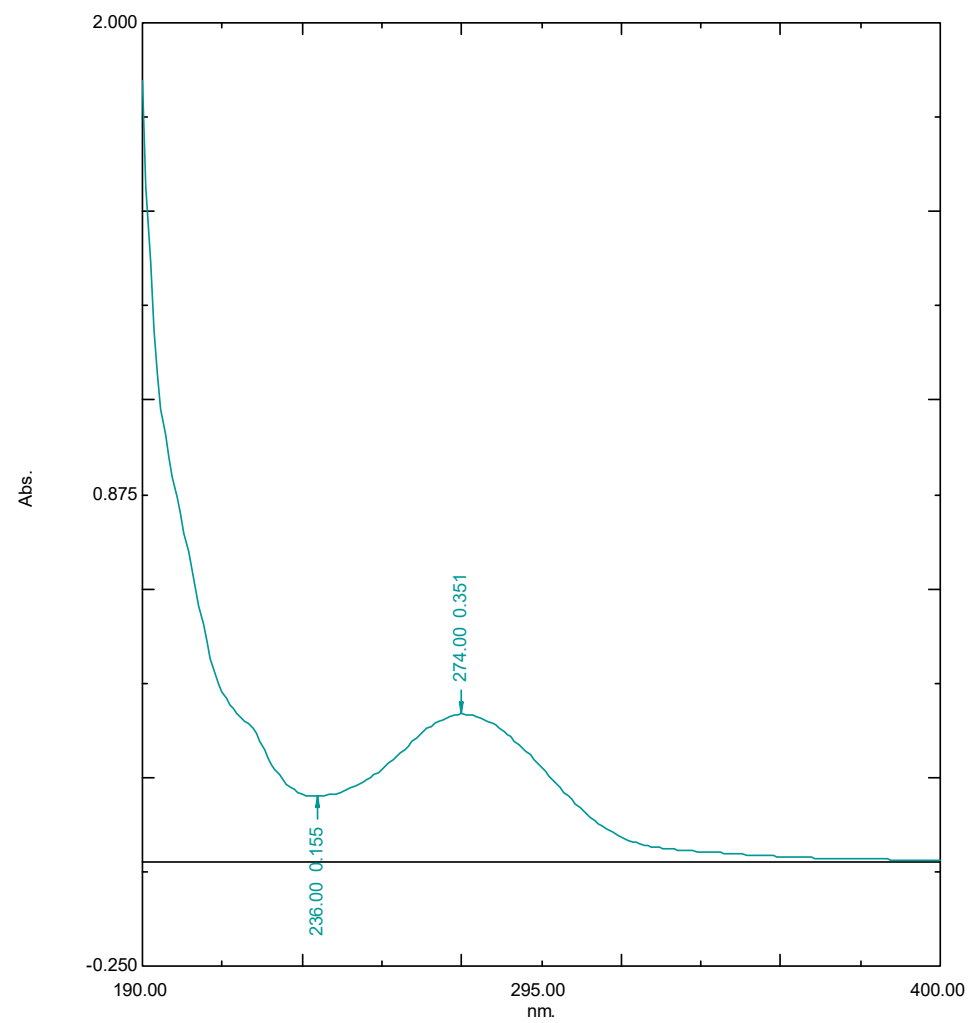



UV absorbance (MeCN,  $1.0 \times 10^{-4} \text{M}$ ) **6p**

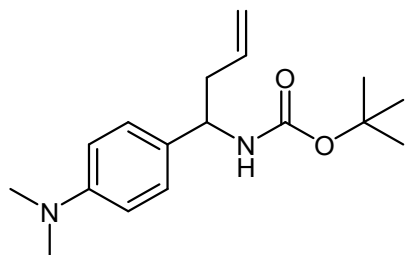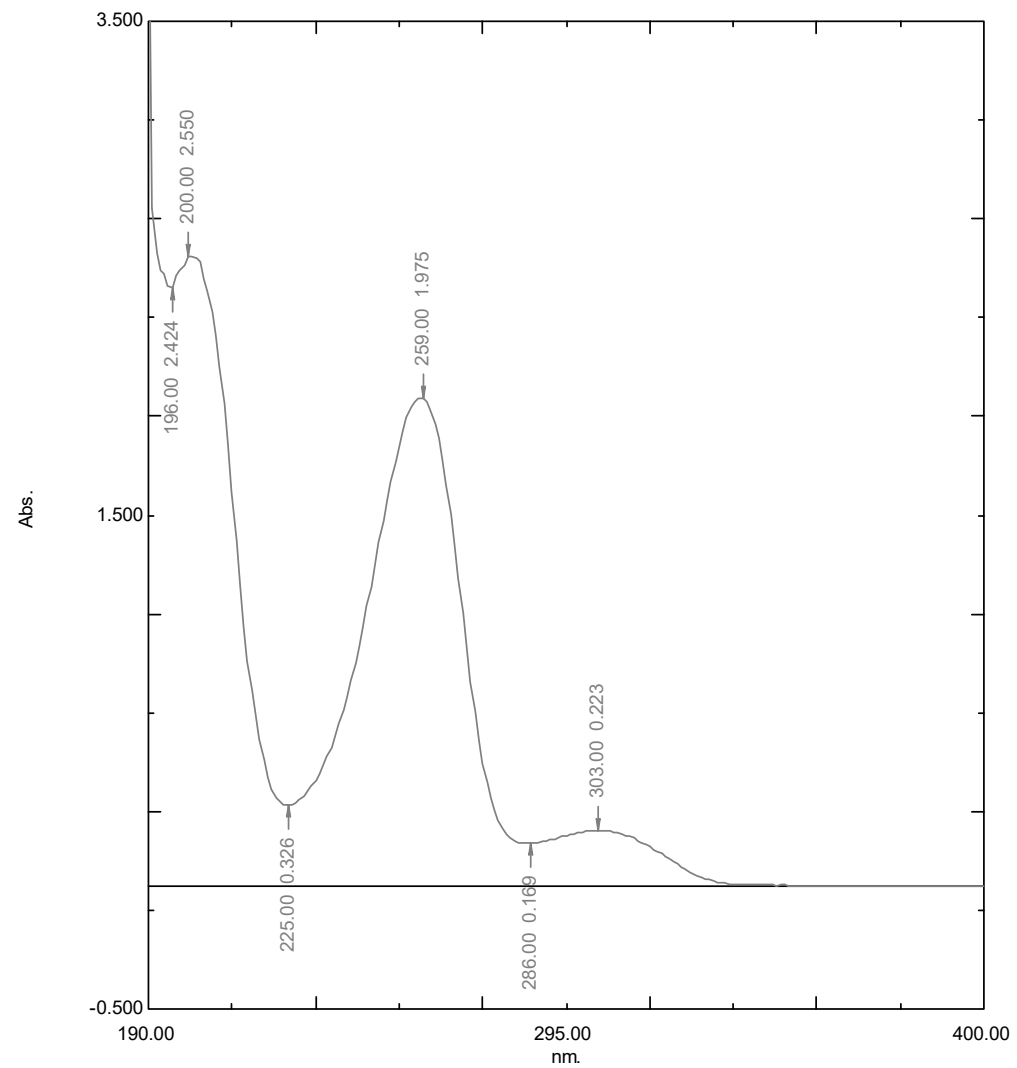

UV absorbance (MeCN,  $1.0 \times 10^{-4} \text{M}$ ) **6q**

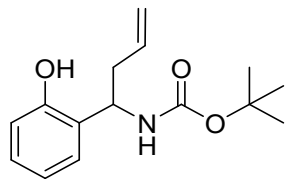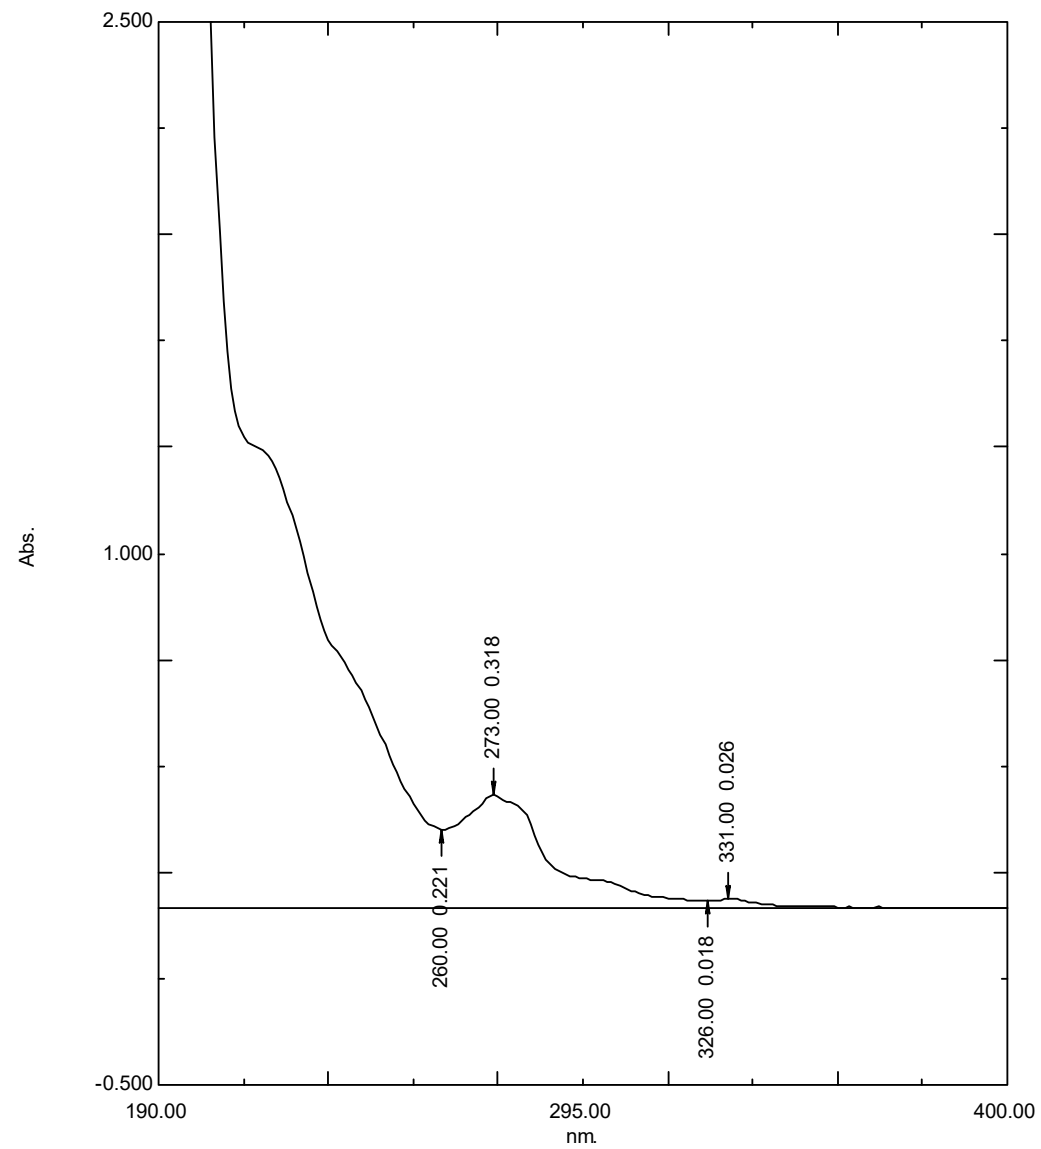

UV absorbance (MeCN,  $1.0 \times 10^{-4} \text{M}$ ) **6r**

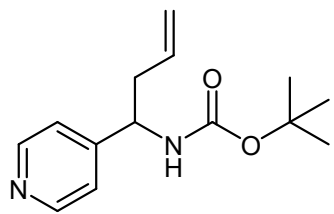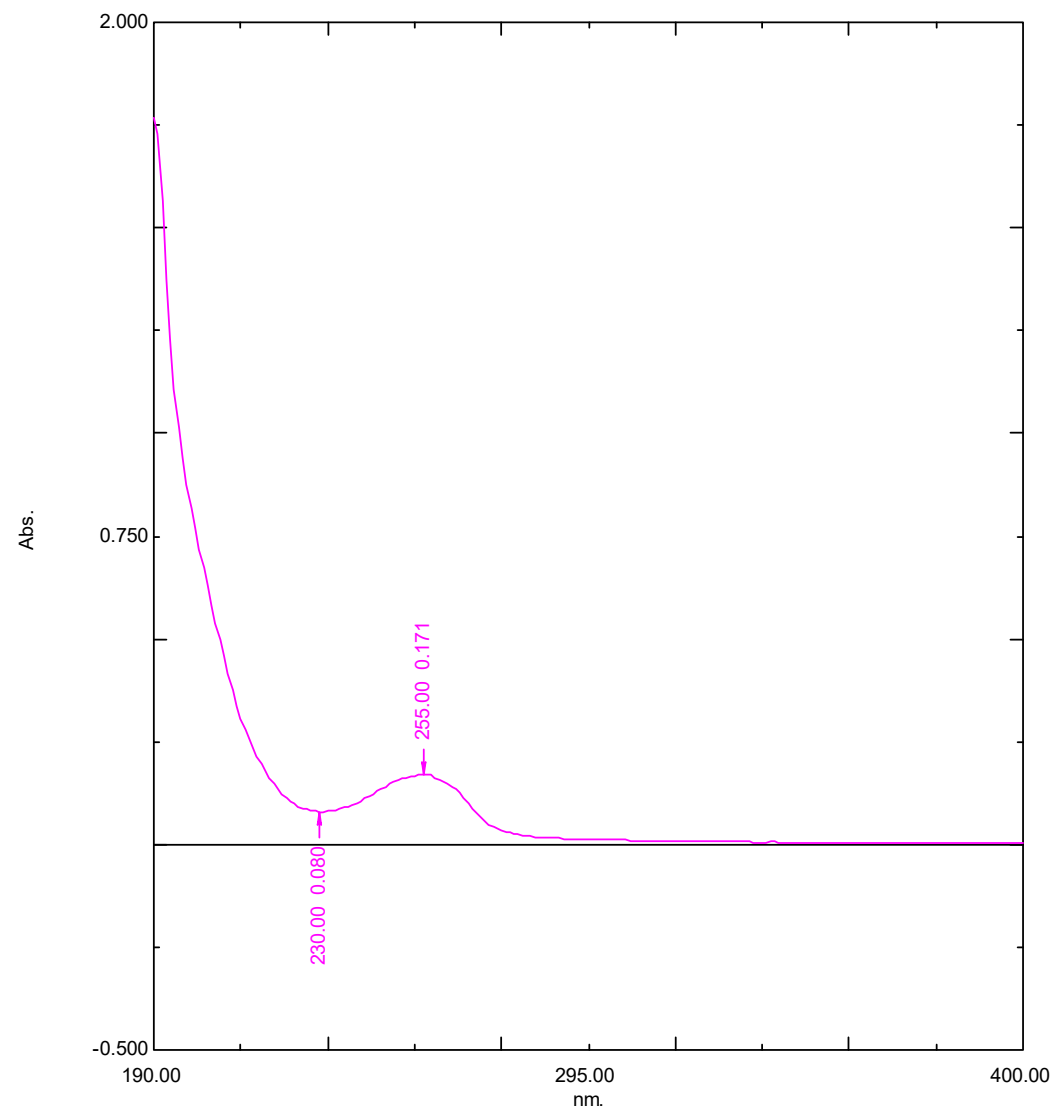

UV absorbance (MeCN,  $1.0 \times 10^{-4} \text{M}$ ) **6s**

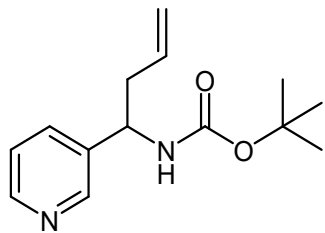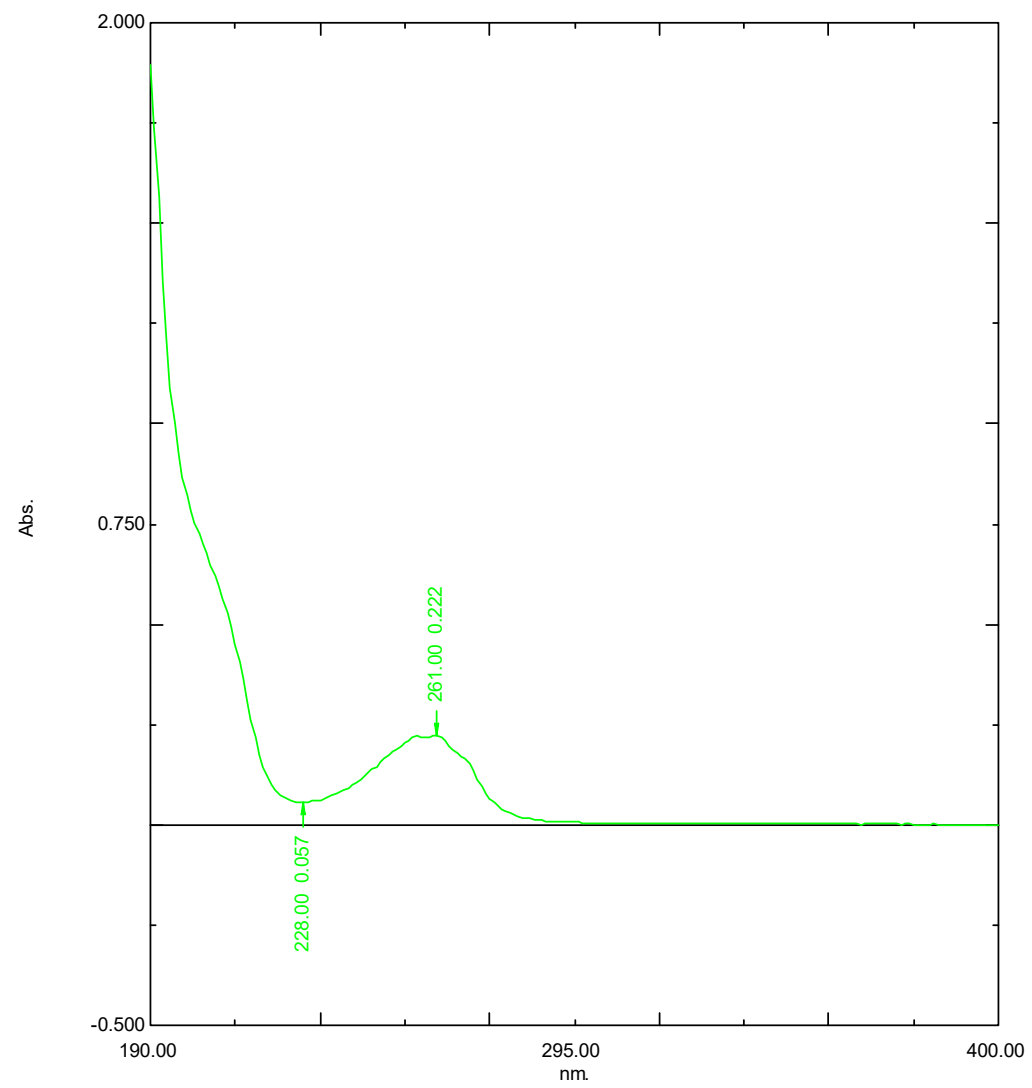

UV absorbance (MeCN,  $1.0 \times 10^{-4} \text{M}$ ) **6t**

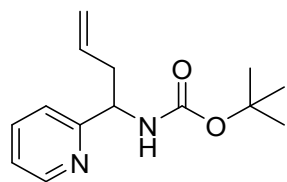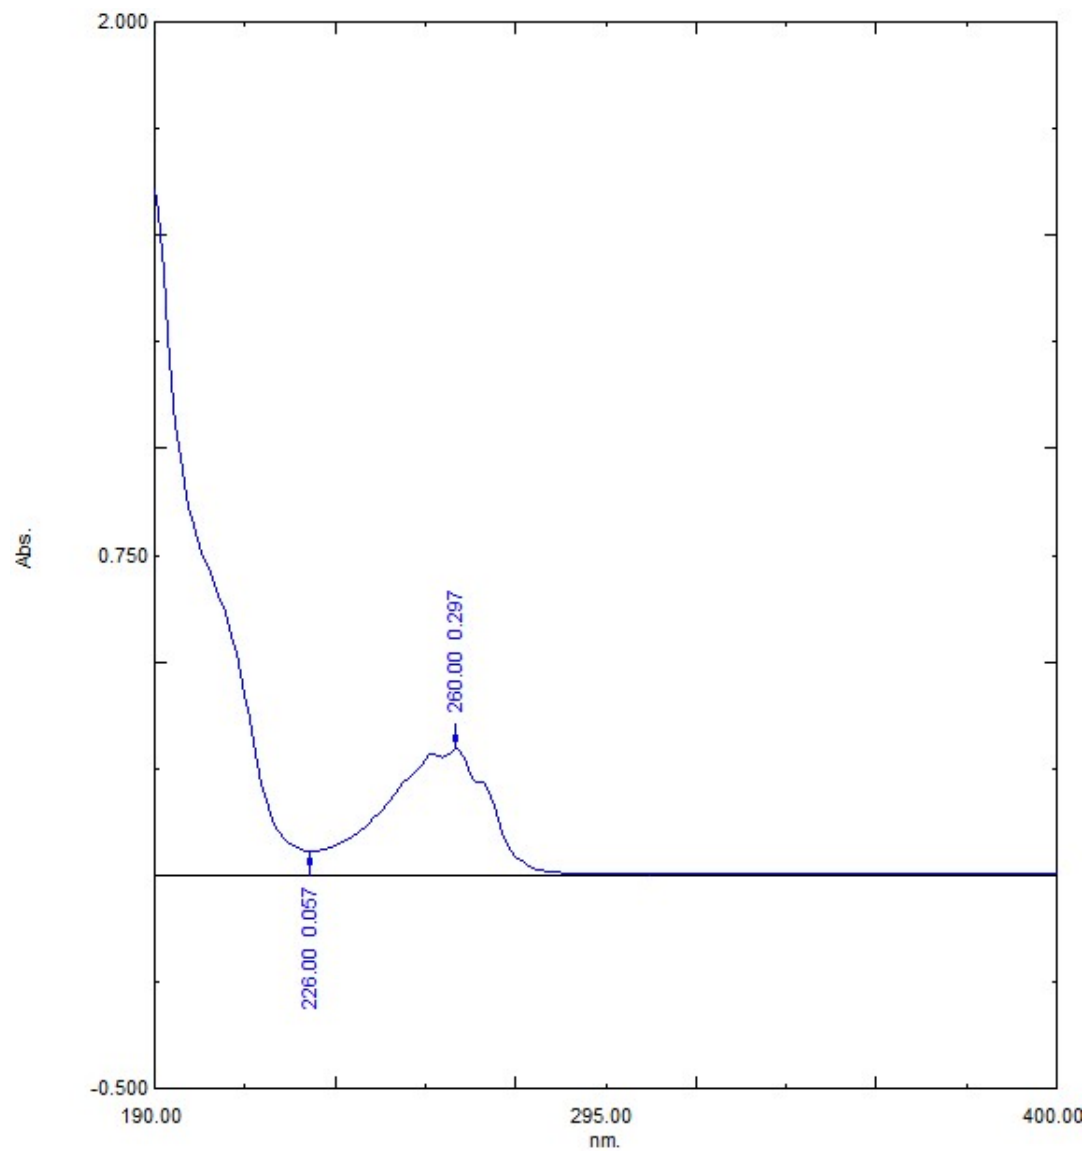

UV absorbance (MeCN,  $1.0 \times 10^{-4} \text{M}$ ) **6u**

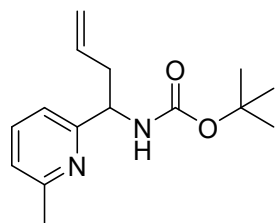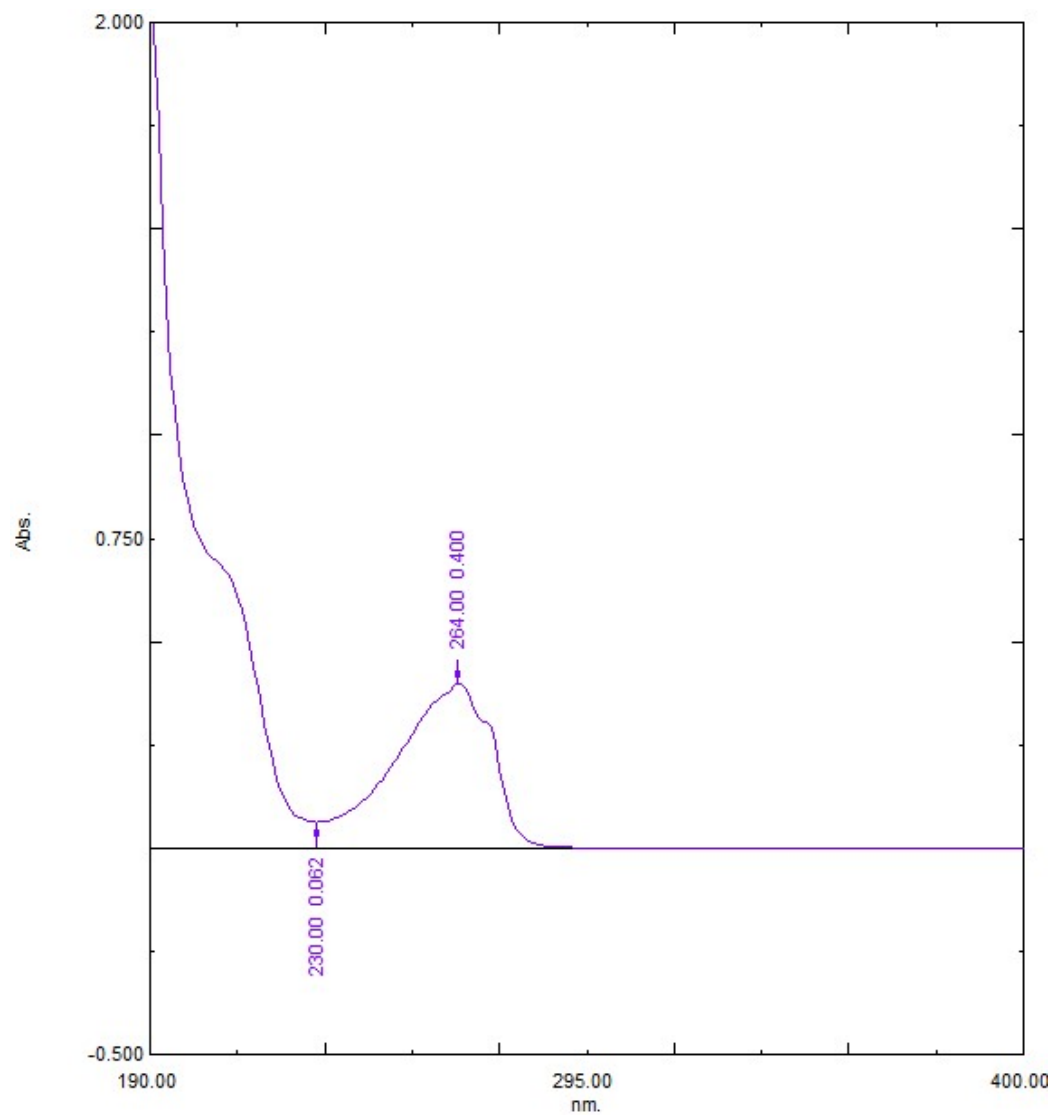

UV absorbance (MeCN,  $1.0 \times 10^{-3} \text{M}$ ) **6v**

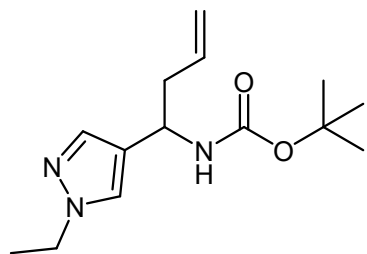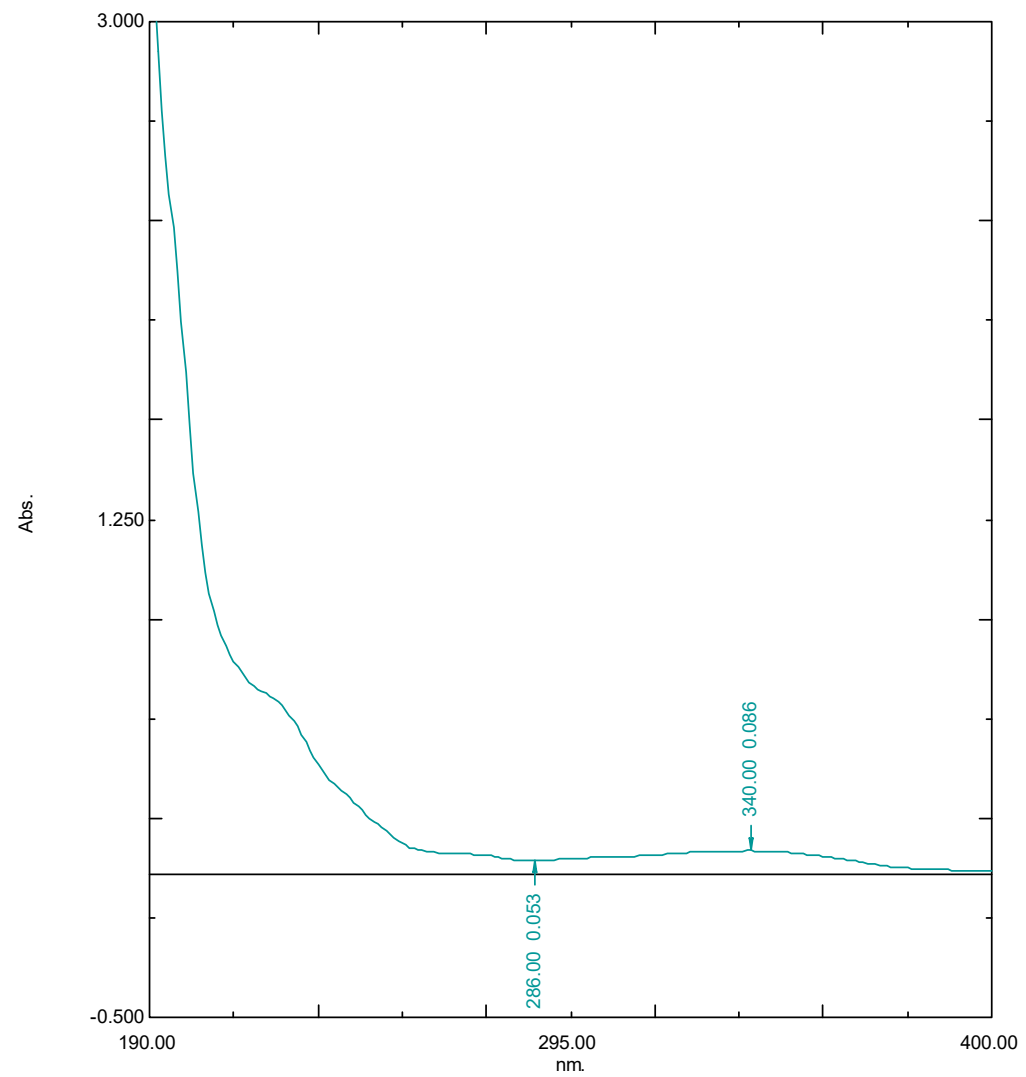

UV absorbance (MeCN,  $1.0 \times 10^{-4} \text{M}$ ) **6w**

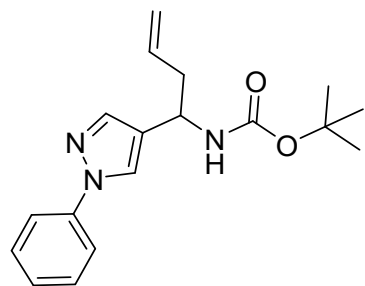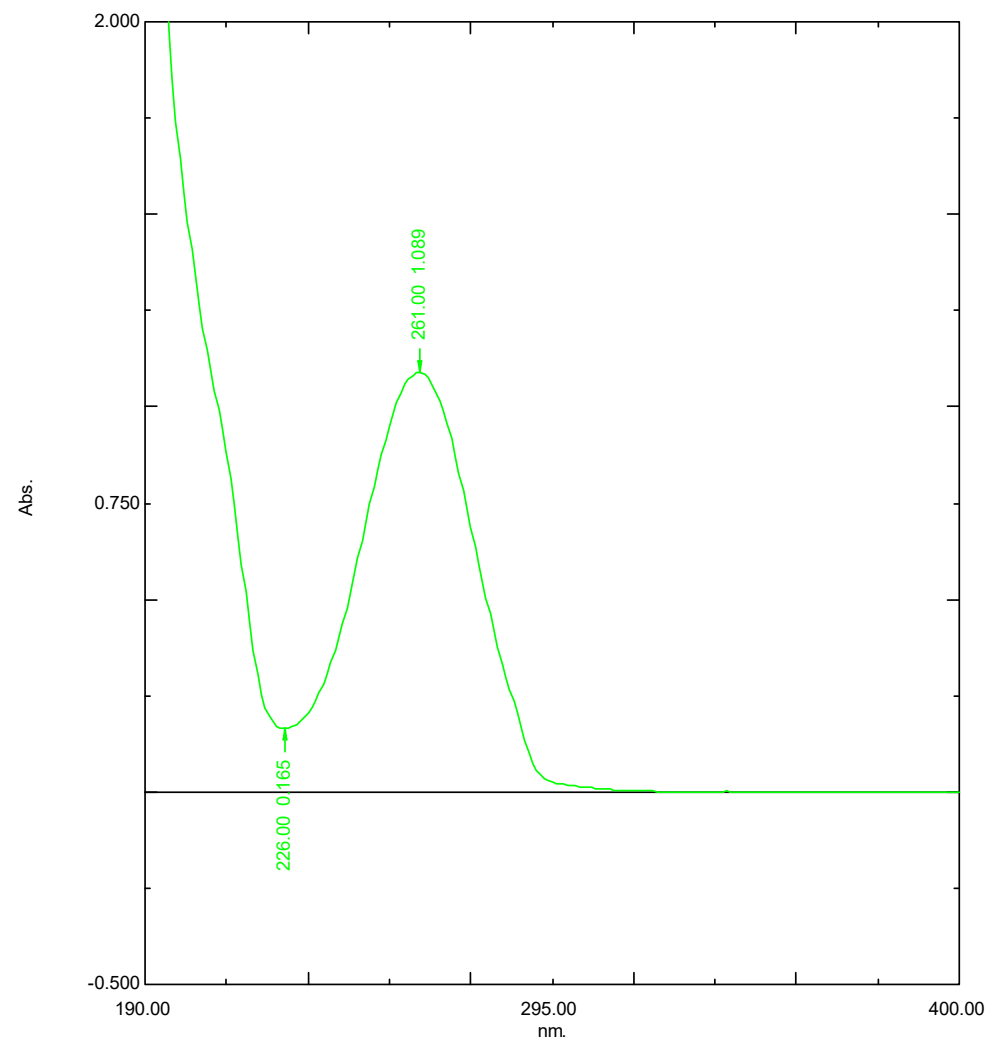



**Enantiomeric analysis of *tert*-butyl (*S*)-(1-(2-bromo-4-fluorophenyl)but-3-en-1-yl)carbamate (6a).**  
Column Kromasil 5-TBB (250x4.6mm, 5 $\mu$ m), eluent *n*-C<sub>6</sub>H<sub>14</sub>/*iso*-PrOH = 95/5, flow rate 1.0 ml/min, UV 220 nm.

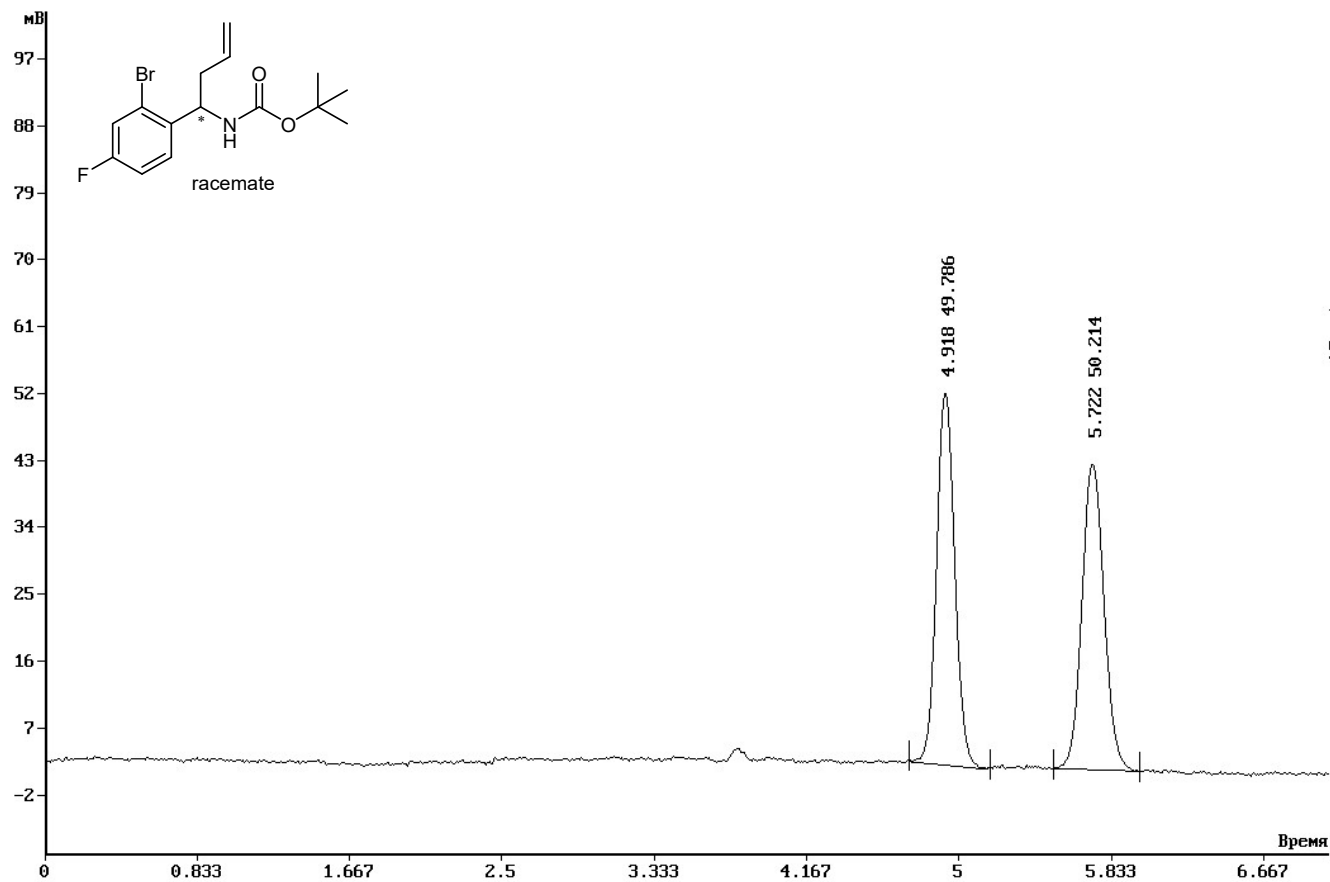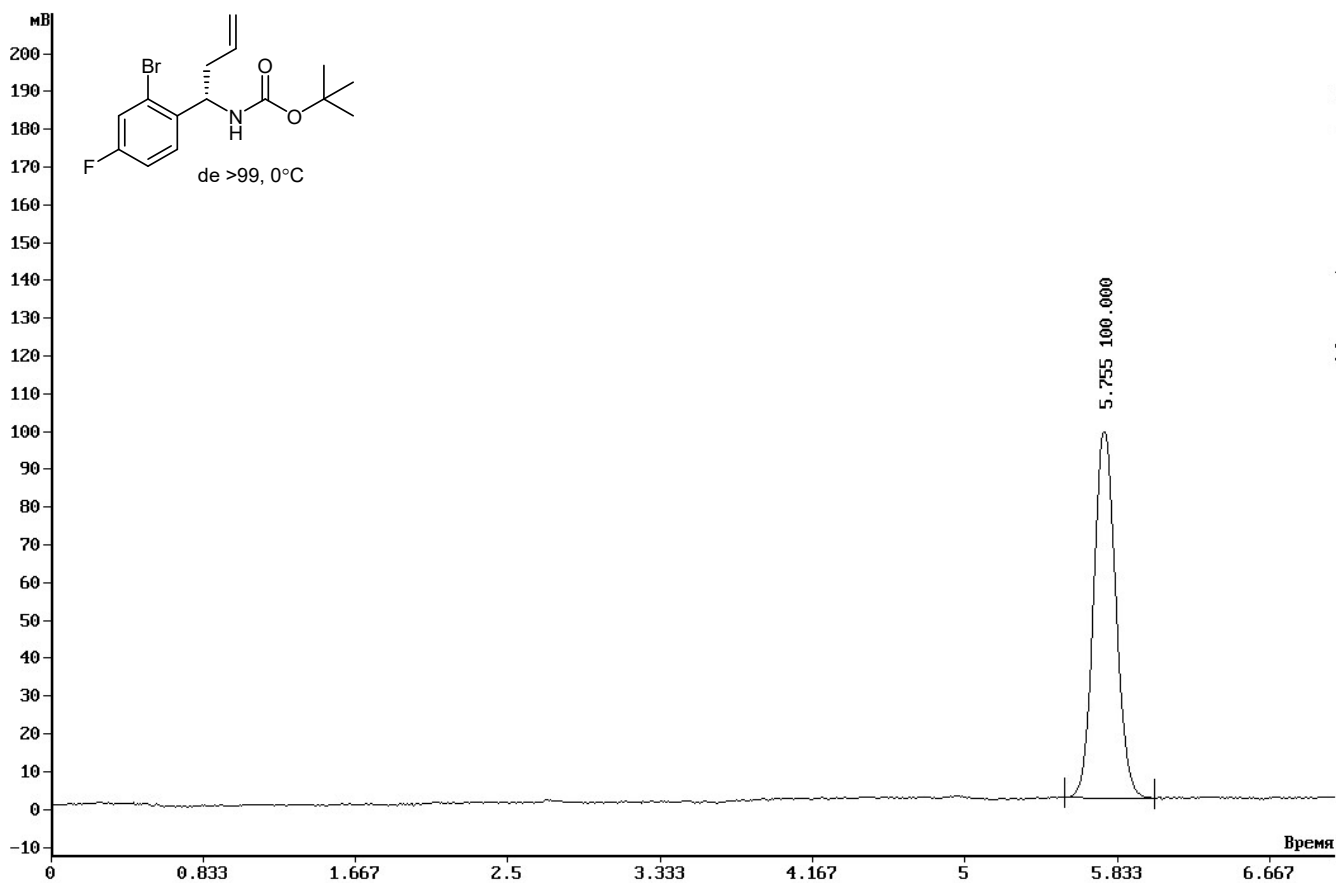

**Enantiomeric analysis of *tert*-butyl (*S*)-(1-phenyl-but-3-en-1-yl)carbamate (6b).**

Column Kromasil 3-AmyCoat (150x4.6mm, 5 $\mu$ m), eluent *n*-C<sub>6</sub>H<sub>14</sub>/*iso*-PrOH = 95/5, flow rate 1.0 ml/min, UV 220 nm.

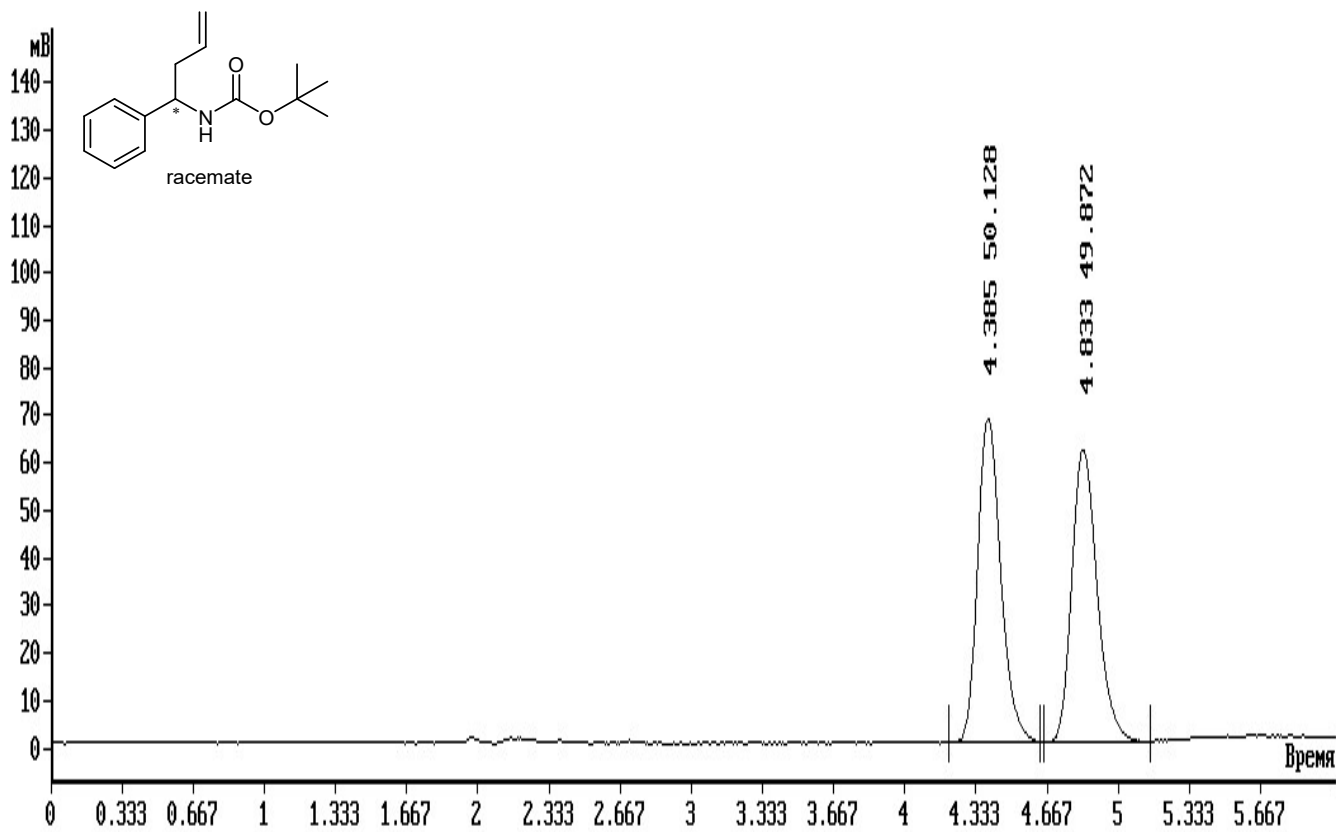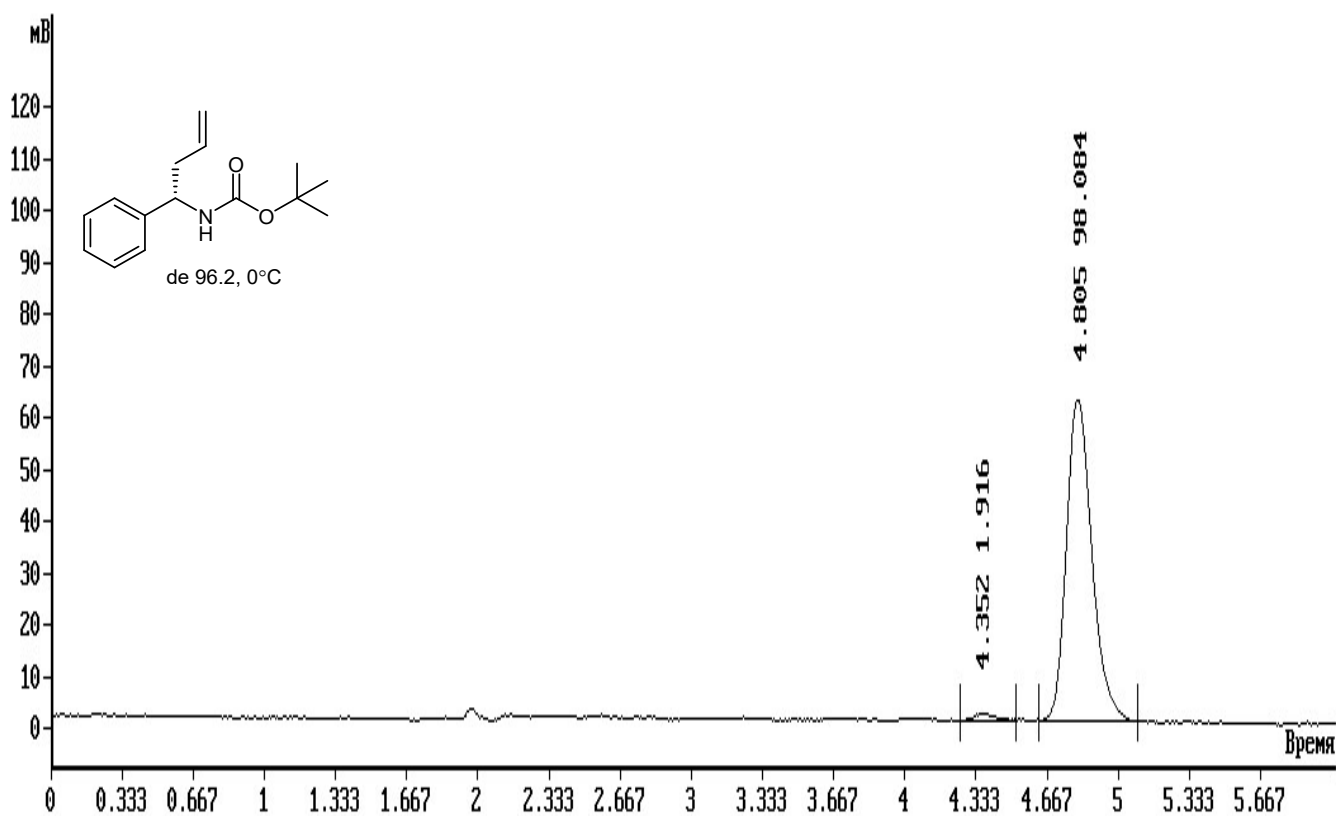

## Enantiomeric analysis of *tert*-butyl (*S*)-(1-(2-fluorophenyl)but-3-en-1-yl)carbamate (6c).

Column Kromasil 3-AmyCoat (150x4.6mm, 5 $\mu$ m), eluent *n*-C<sub>6</sub>H<sub>14</sub>/*iso*-PrOH = 95/5, flow rate 1.0 ml/min, UV 260 m.

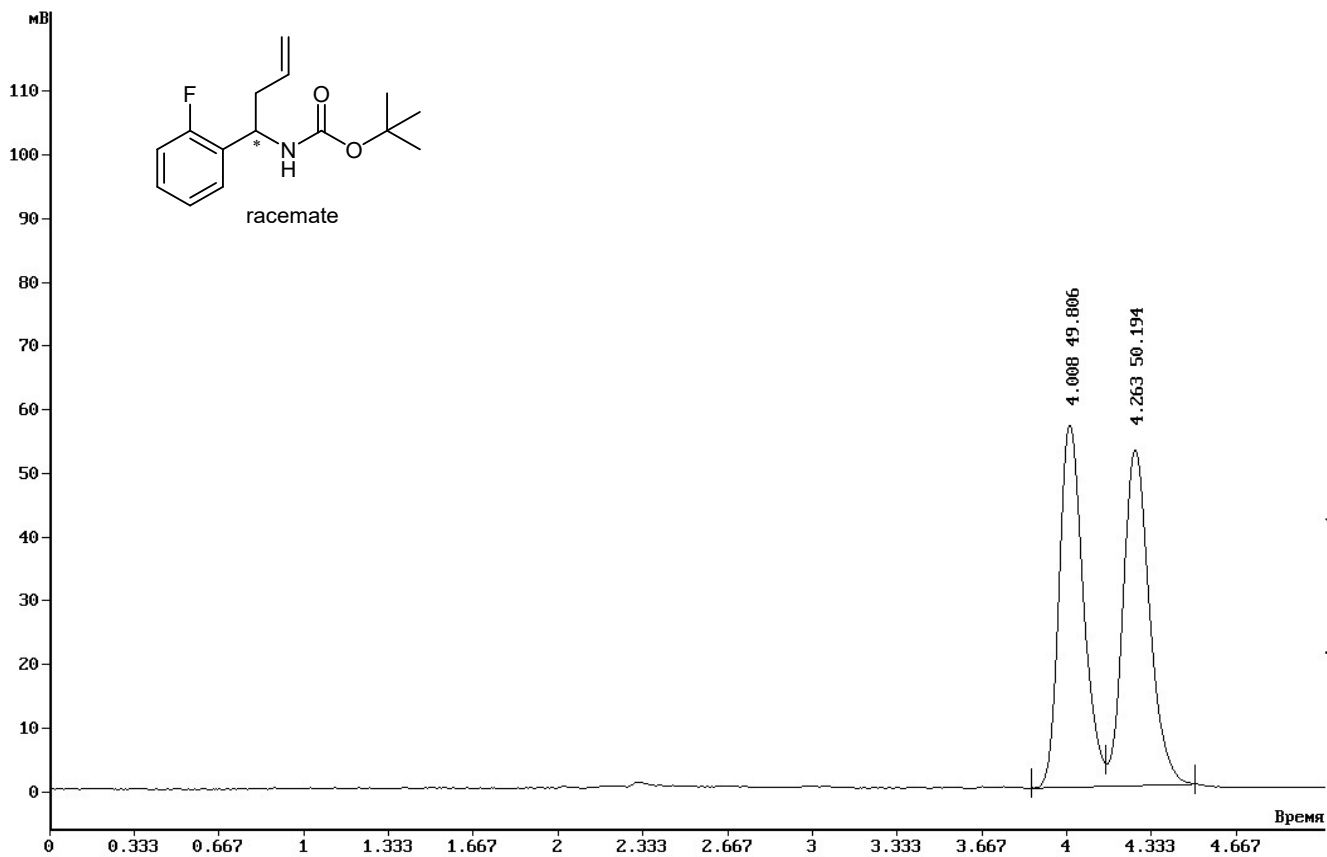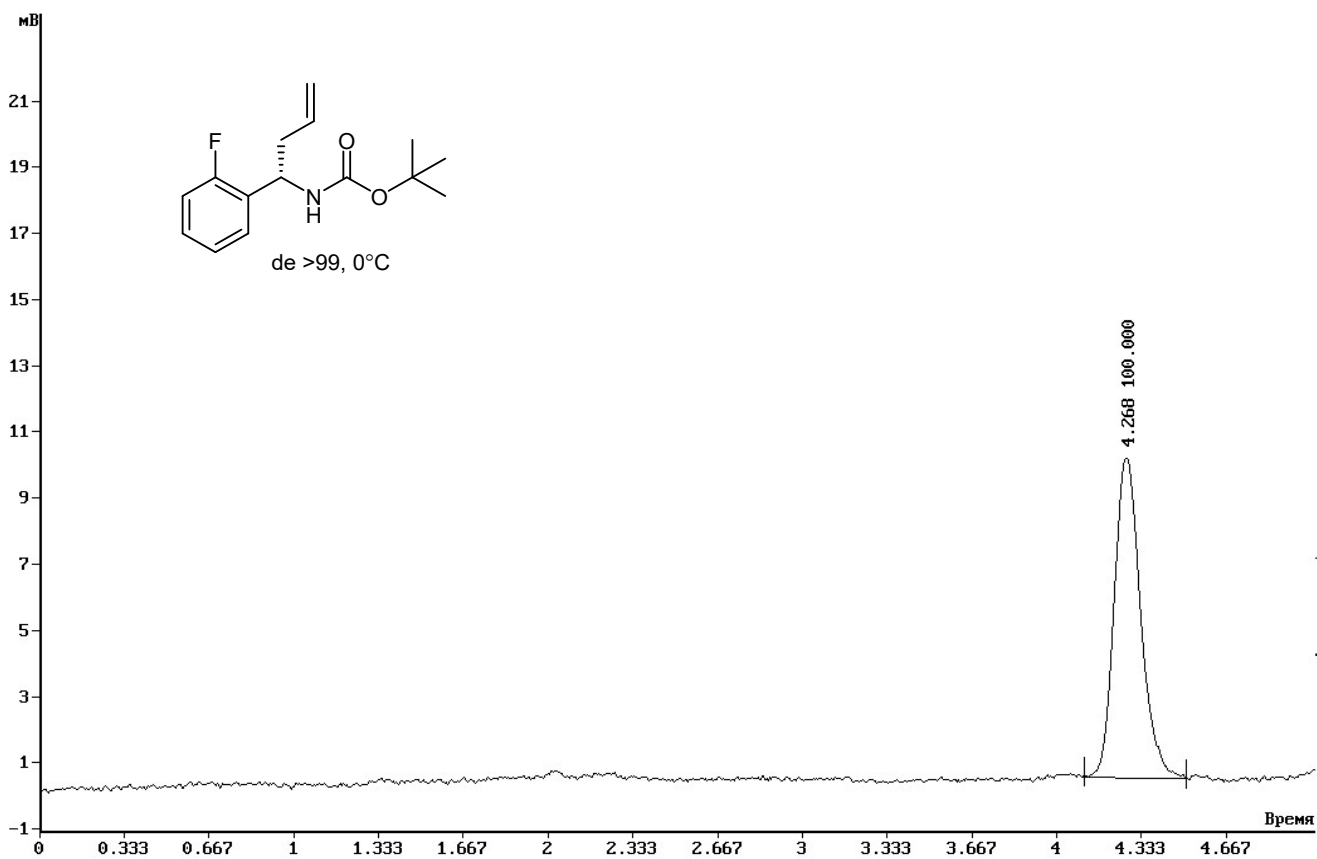

**Enantiomeric analysis of *tert*-butyl (*R*)-(1-(2-iodophenyl)but-3-en-1-yl)carbamate (6d).**

Column Kromasil 3-AmyCoat (150x4.6mm, 5 $\mu$ m), eluent *n*-C<sub>6</sub>H<sub>14</sub>/*iso*-PrOH = 95/5, flow rate 1.0 ml/min, UV 260 nm.

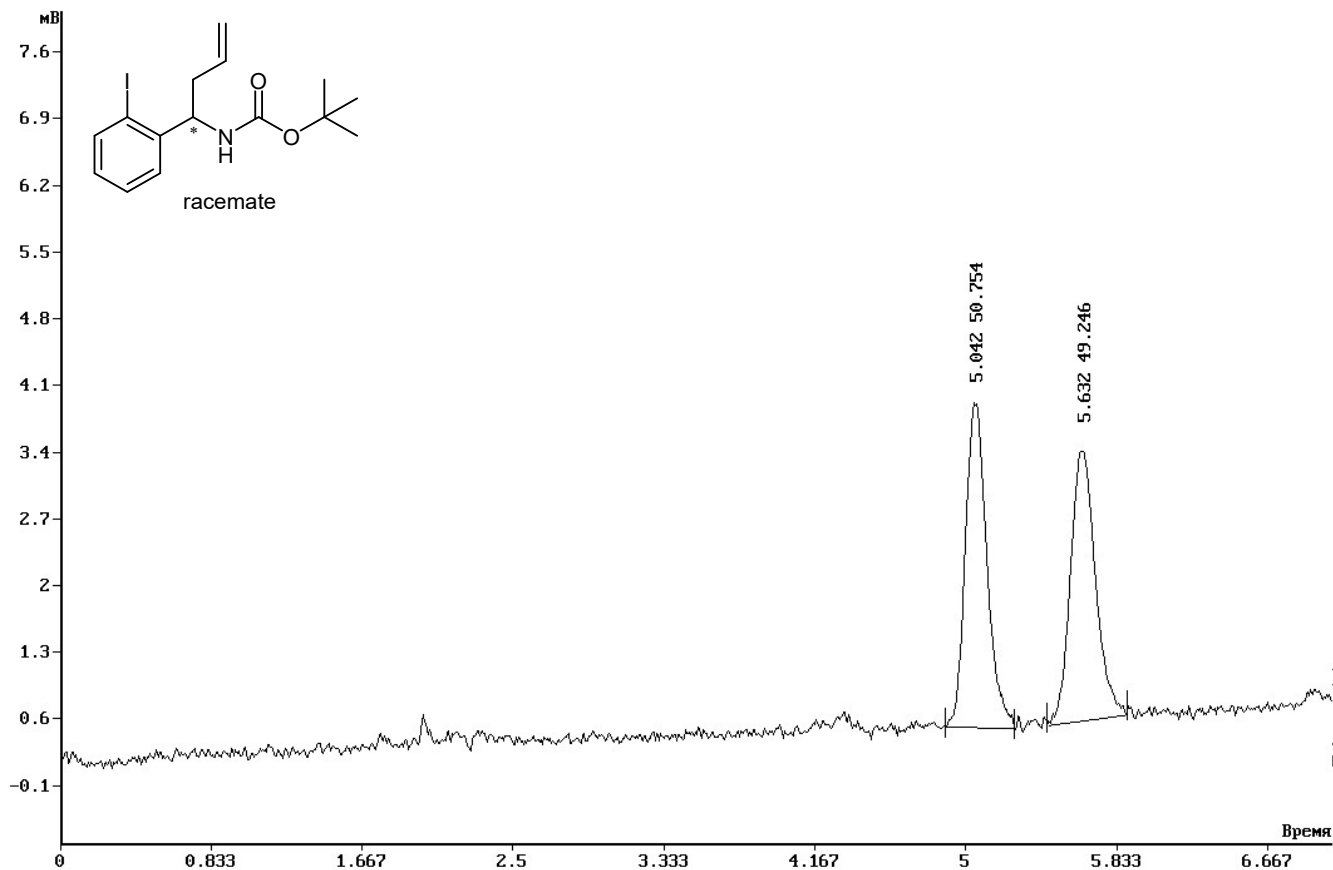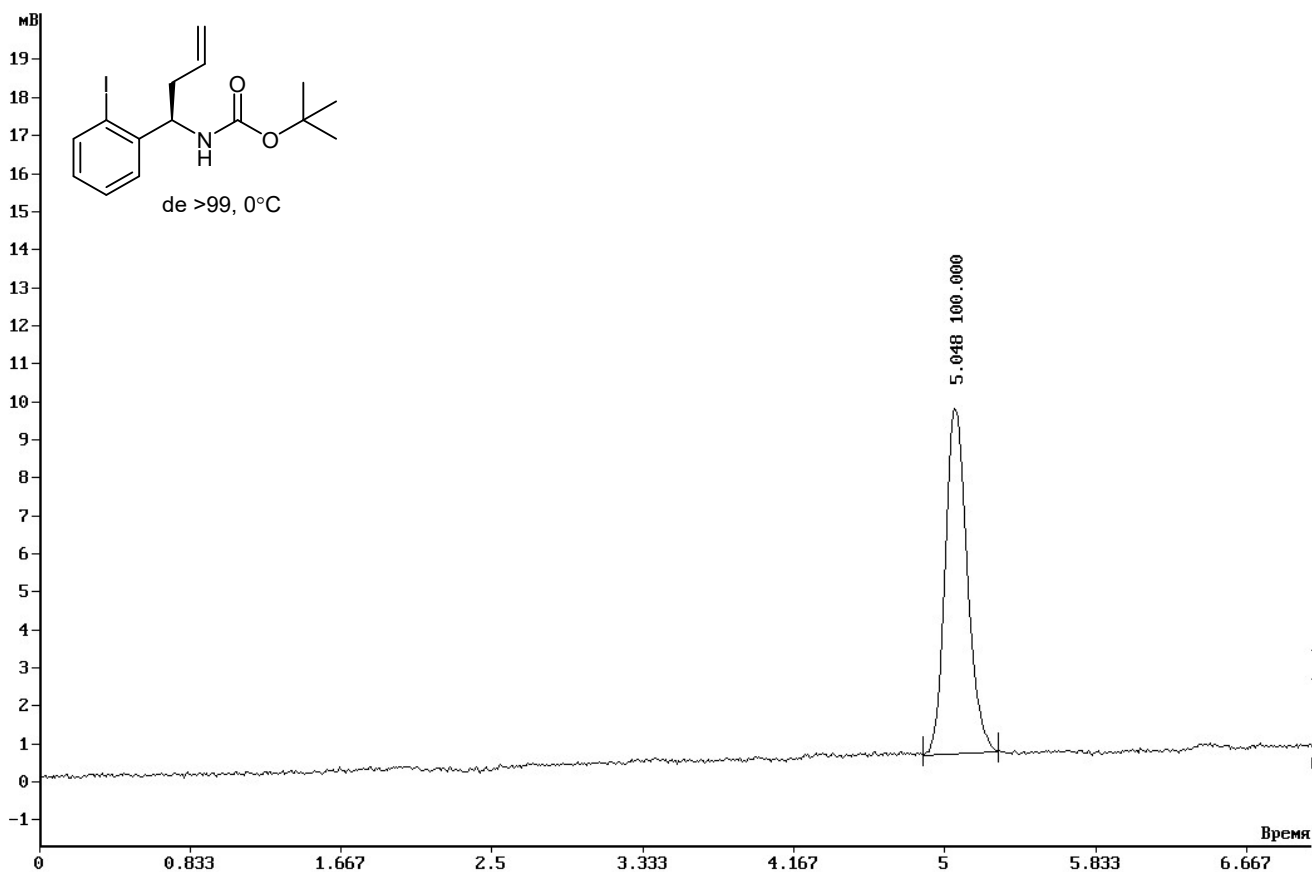

**Enantiomeric analysis of *tert*-butyl (*S*)-(1-(2-chlorophenyl)but-3-en-1-yl)carbamate (6e).**

Column Kromasil 3-AmyCoat (150x4.6mm, 5 $\mu$ m), eluent *n*-C<sub>6</sub>H<sub>14</sub>/*iso*-PrOH = 98/2, flow rate 0.75 ml/min, UV 220 nm.

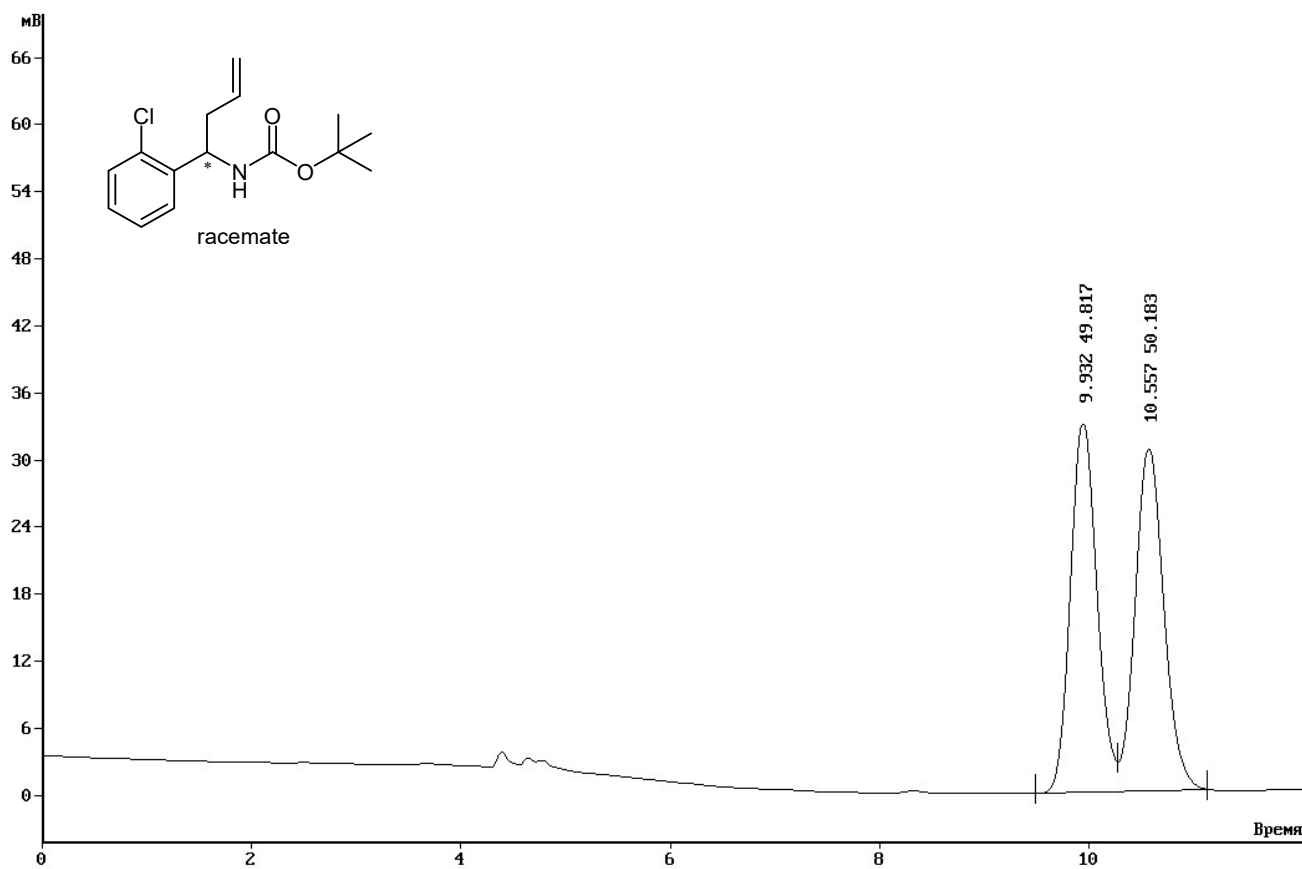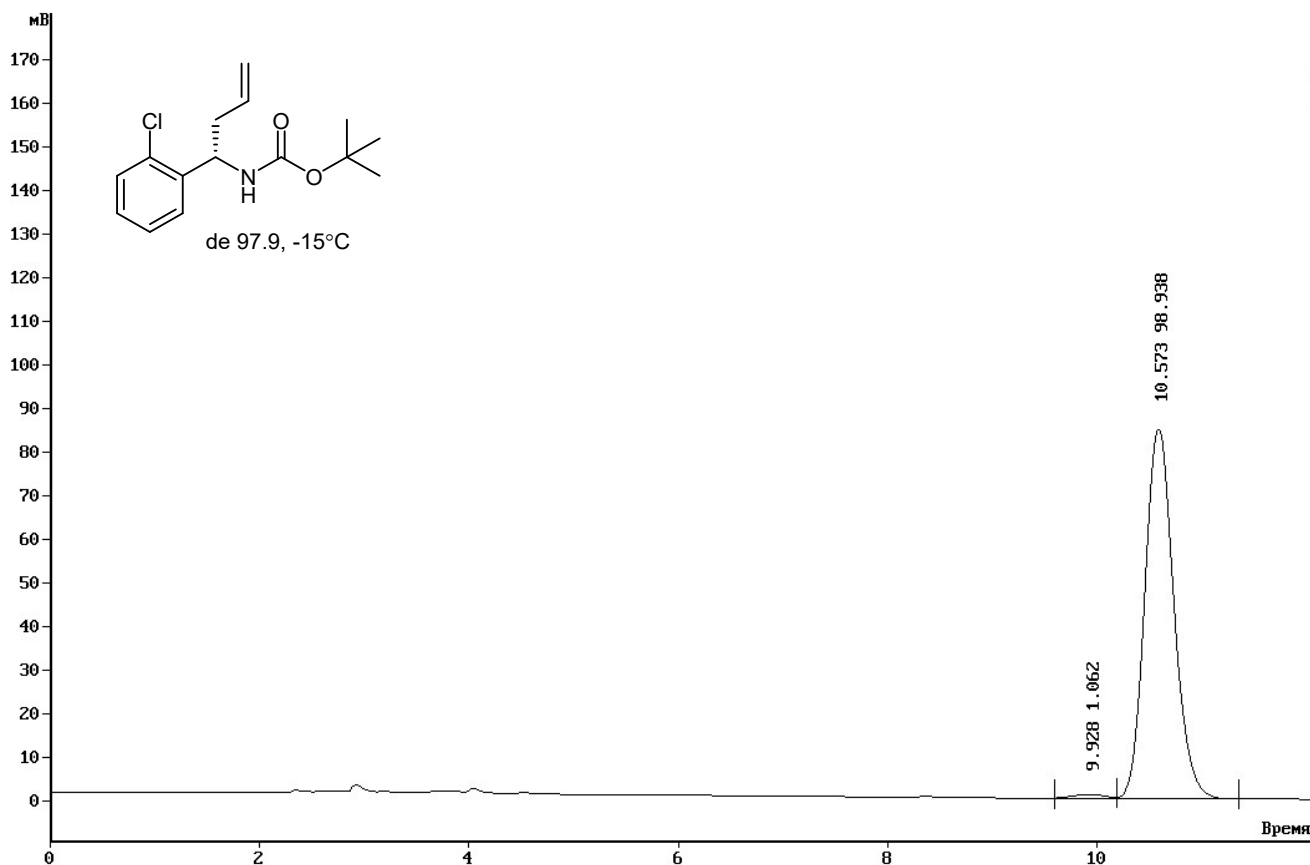

**Enantiomeric analysis of *tert*-butyl (*S*)-(1-(2-bromophenyl)but-3-en-1-yl)carbamate (6f).**

Column Kromasil 5-TBB (250x4.6mm, 5 $\mu$ m), eluent *n*-C<sub>6</sub>H<sub>14</sub>/*iso*-PrOH = 98/2, flow rate 0.75 ml/min, UV 220 nm.

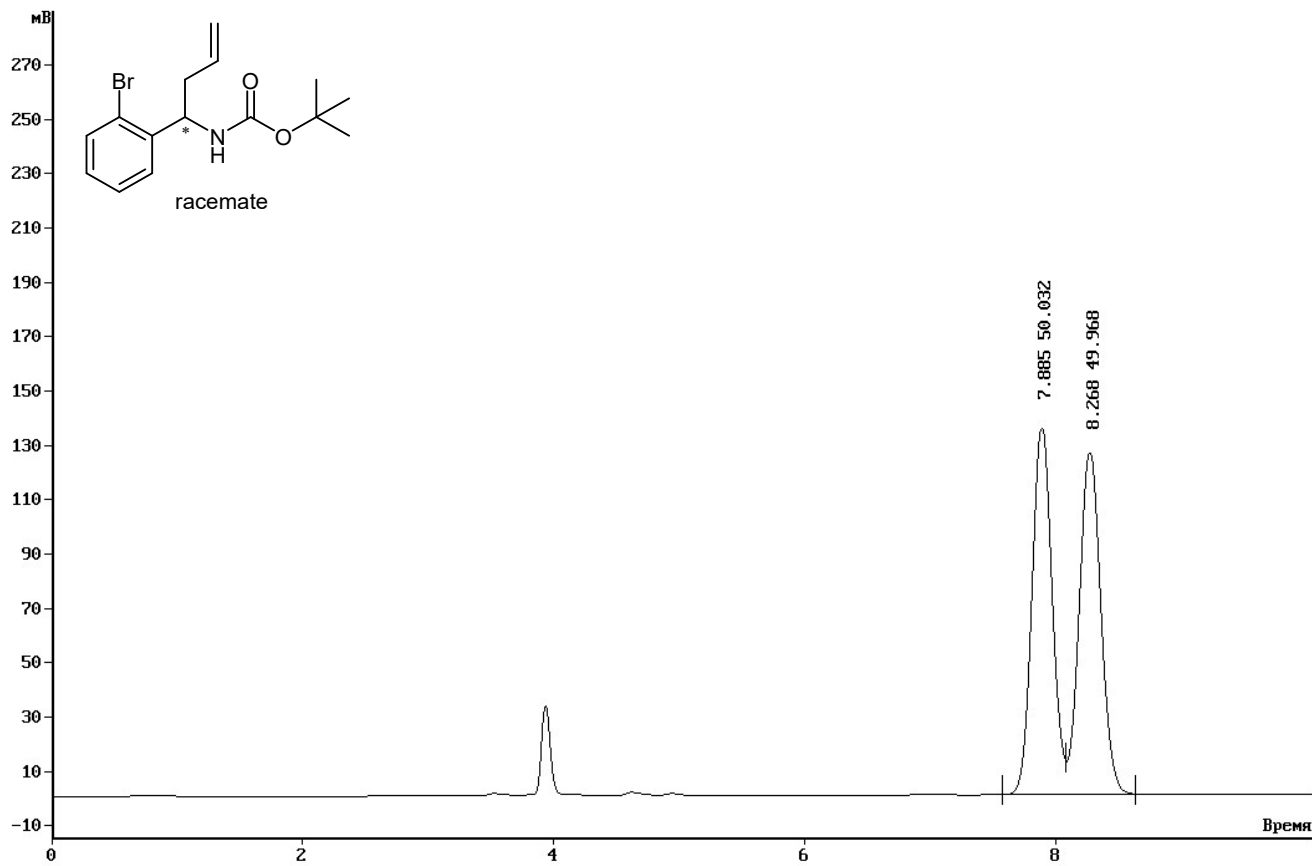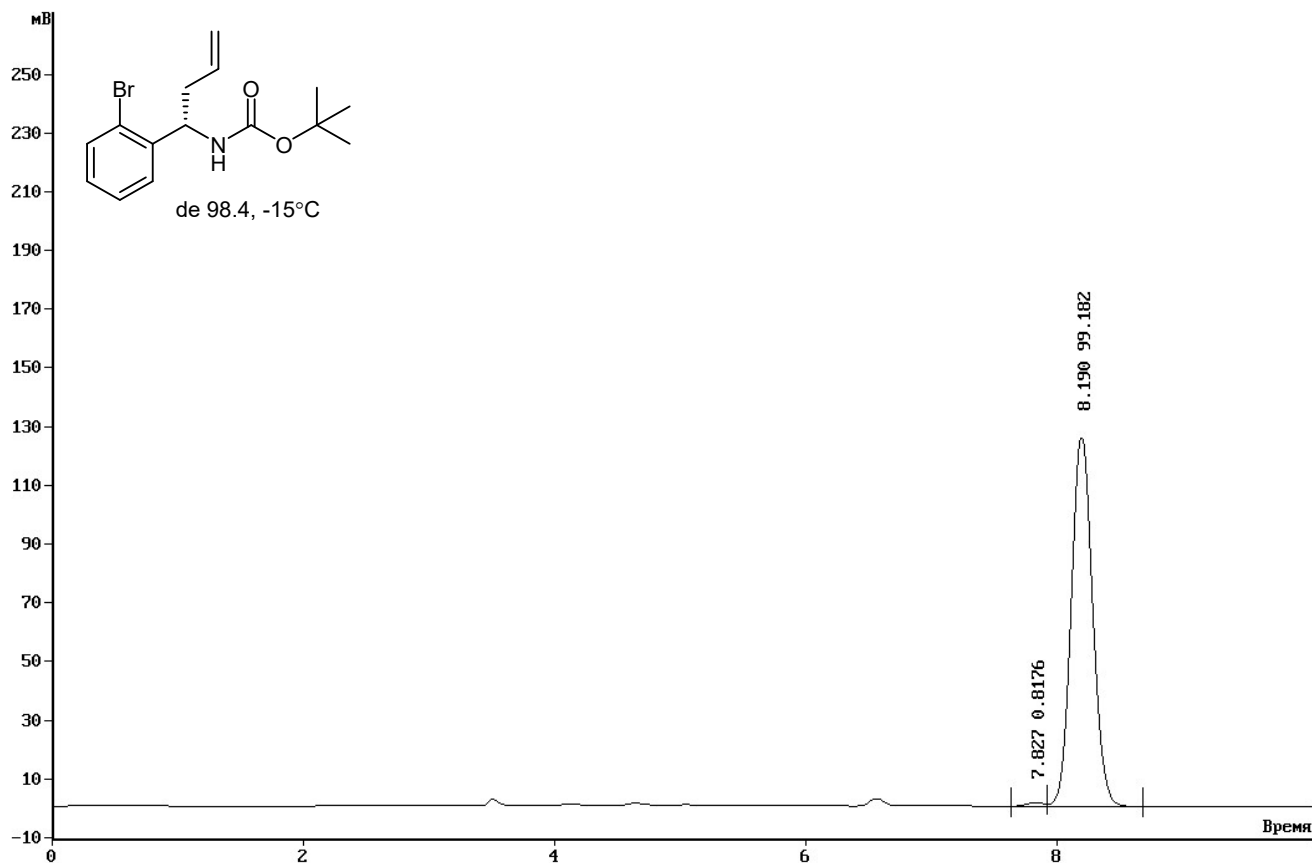

**Enantiomeric analysis of *tert*-butyl (*S*)-(1-(3-bromophenyl)but-3-en-1-yl)carbamate (6g).**

Column Kromasil 5-TBB (250x4.6mm, 5 $\mu$ m), eluent *n*-C<sub>6</sub>H<sub>14</sub>/*iso*-PrOH = 95/5, flow rate 1.0 ml/min, UV 220 nm.

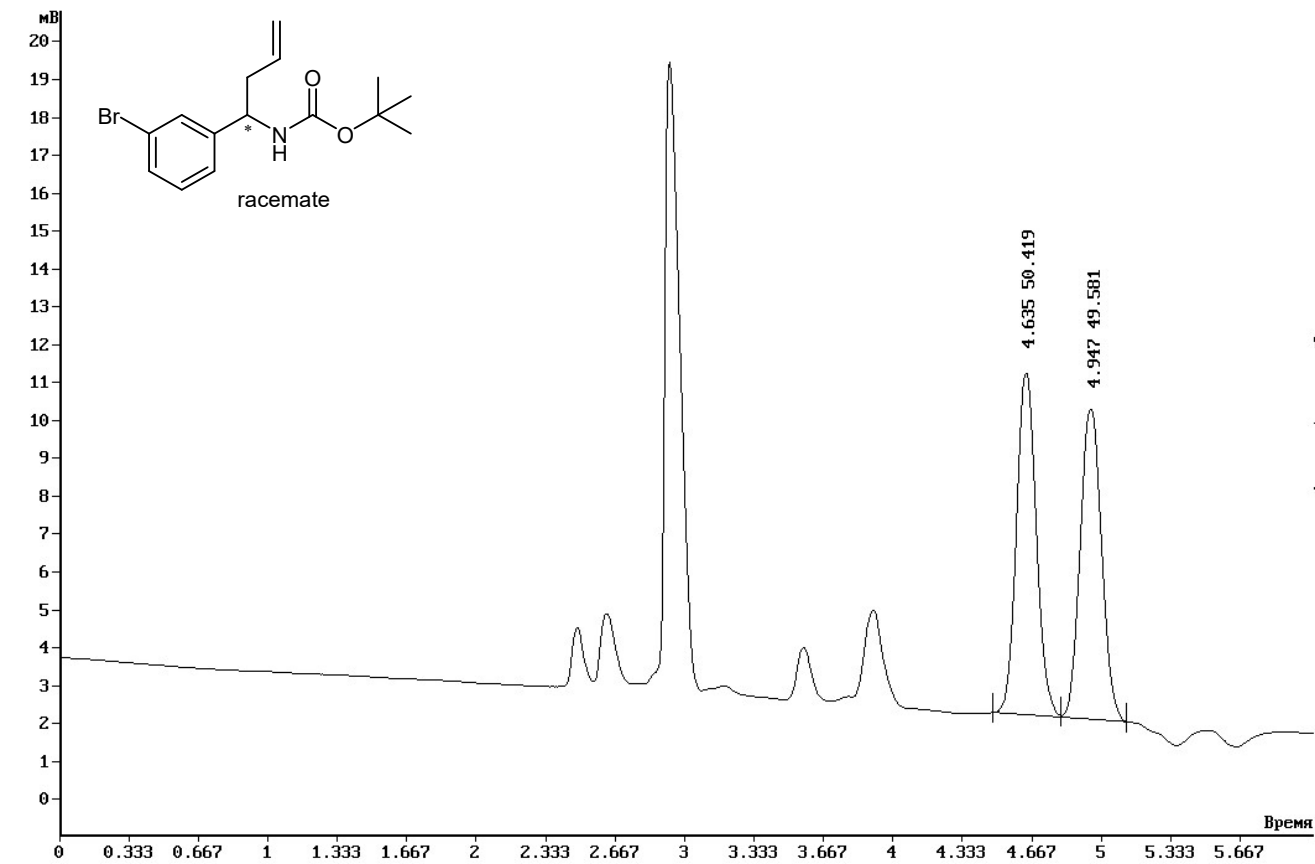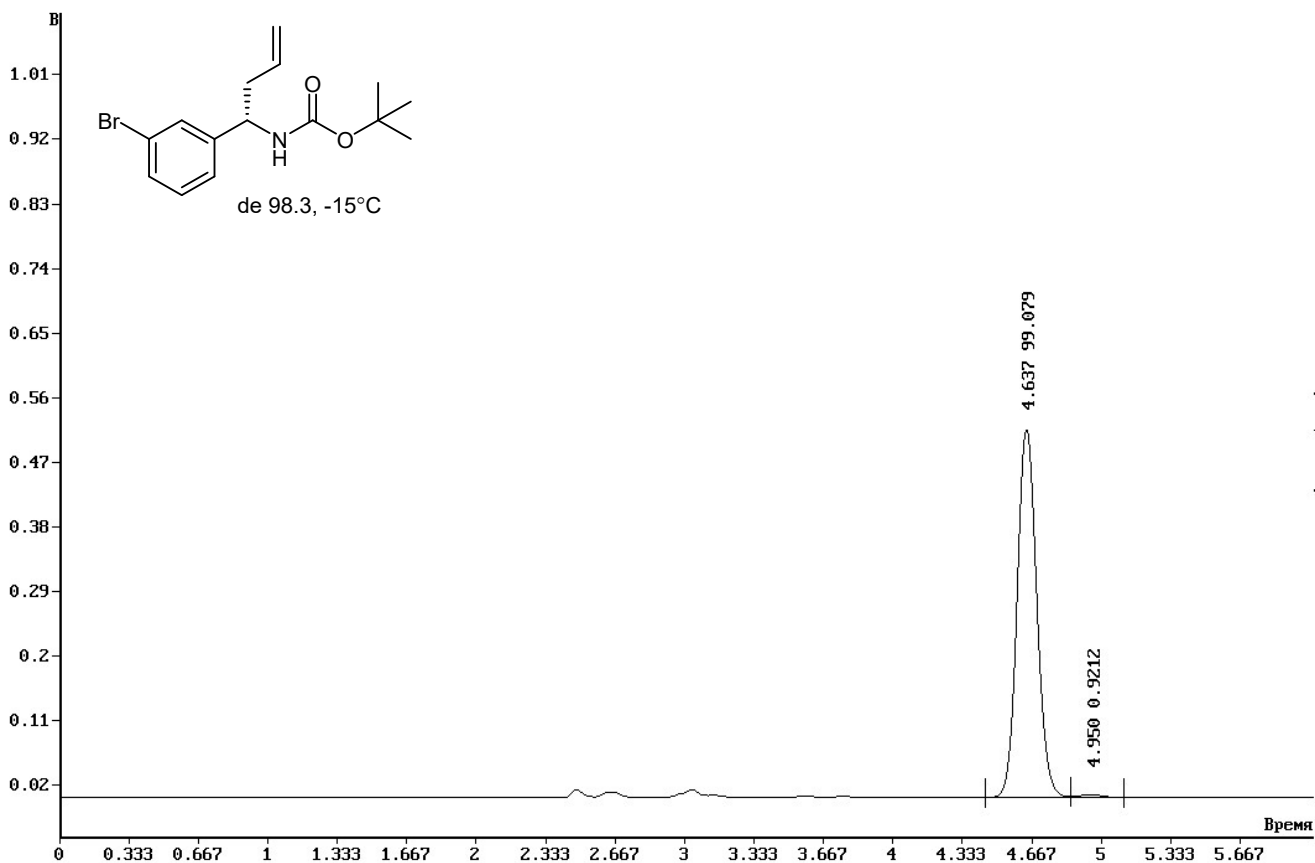

**Enantiomeric analysis of *tert*-butyl (*S*)-(1-(*m*-tolyl)but-3-en-1-yl)carbamate (6h).**

Column Kromasil 3-AmyCoat (150x4.6mm, 5 $\mu$ m), eluent *n*-C<sub>6</sub>H<sub>14</sub>/*iso*-PrOH = 95/5, flow rate 1.0 ml/min, UV 220 nm.

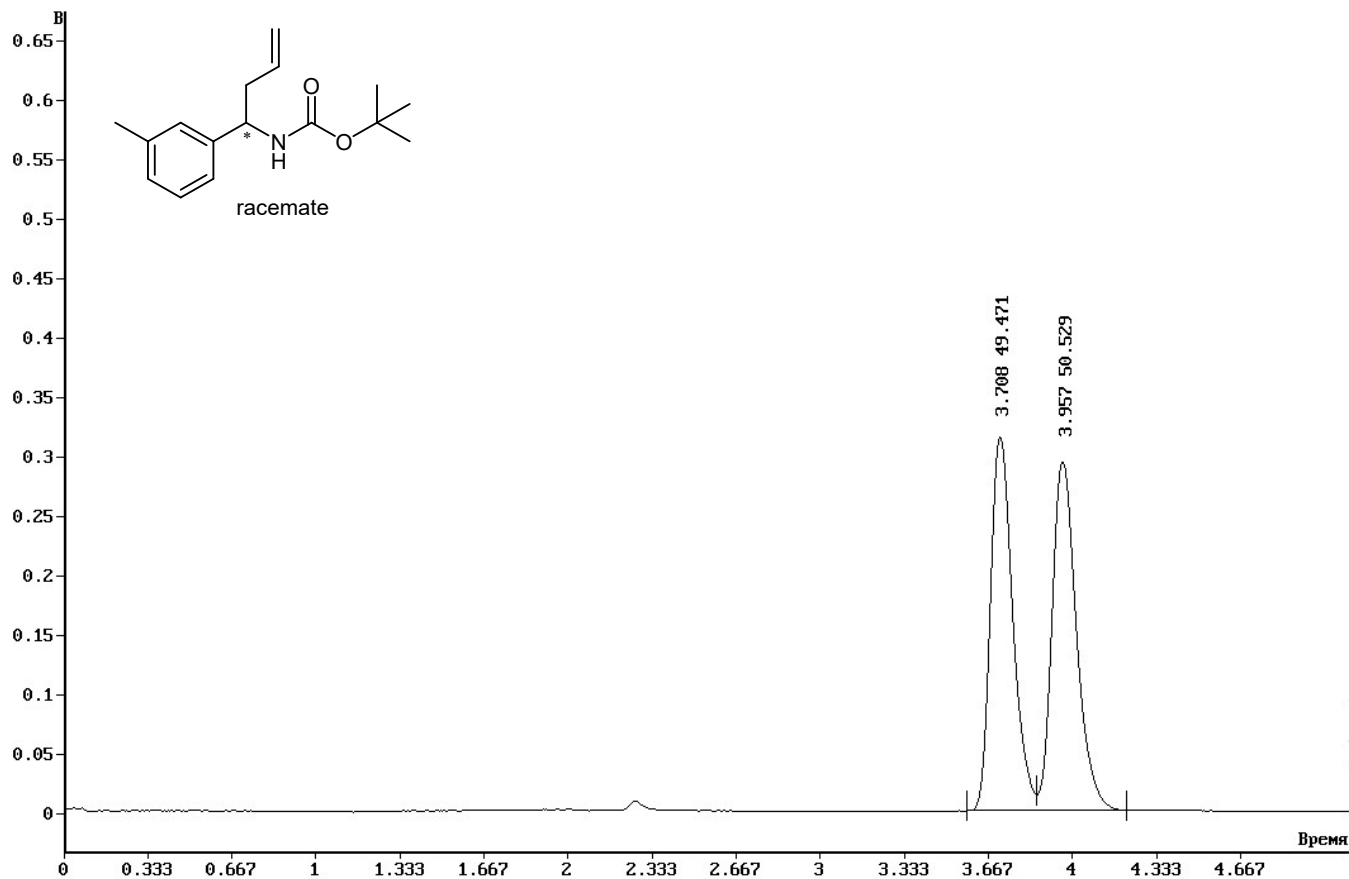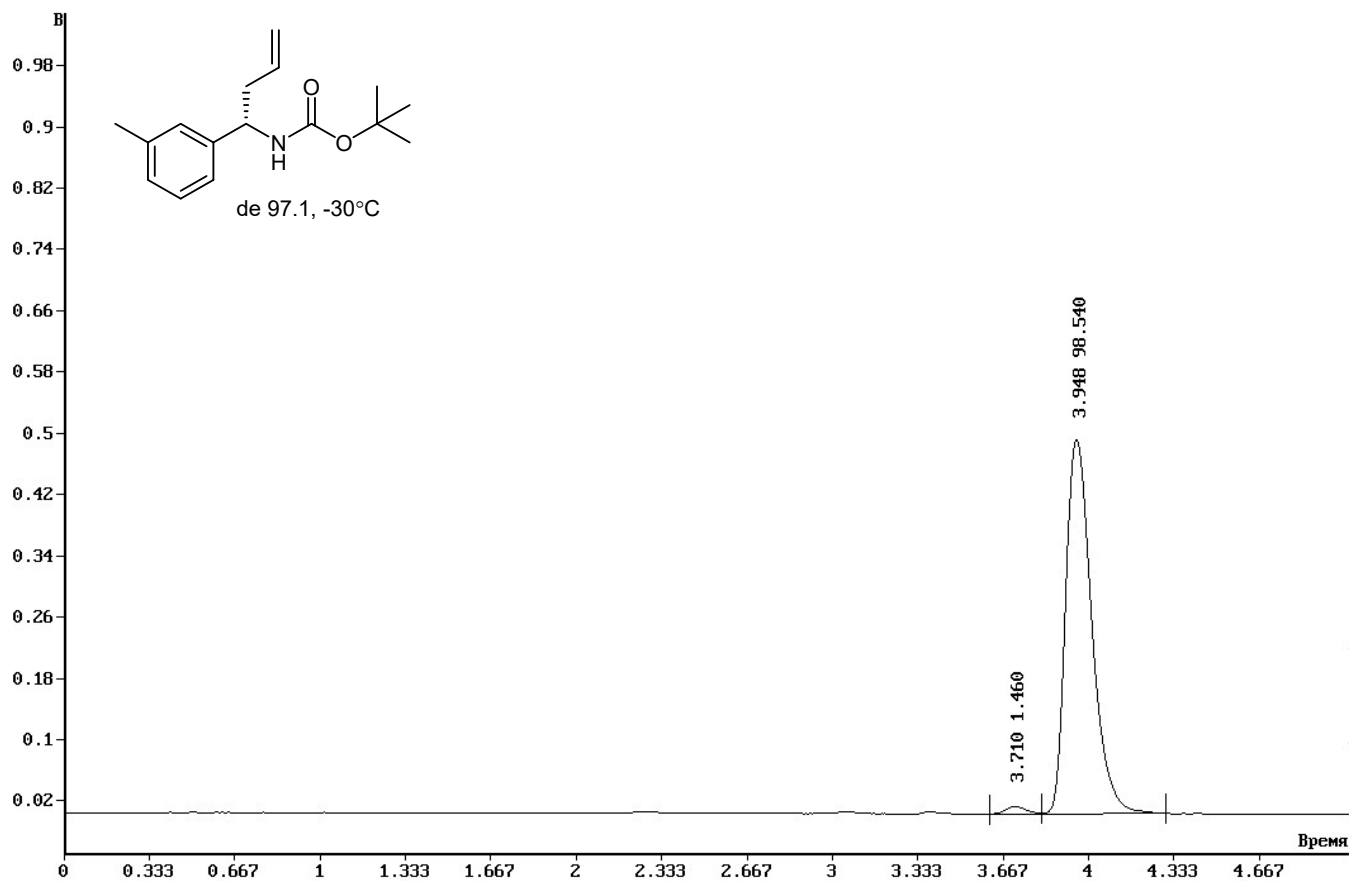



**Enantiomeric analysis of *tert*-butyl (*S*)-(1-(4-methoxy-2,3-dimethylphenyl)but-3-en-1-yl)carbamate (6i).**  
Column Kromasil 3-AmyCoat (150x4.6mm, 5 $\mu$ m), eluent *n*-C<sub>6</sub>H<sub>14</sub>/*iso*-PrOH = 95/5, flow rate 1.0 ml/min, UV 260 nm.

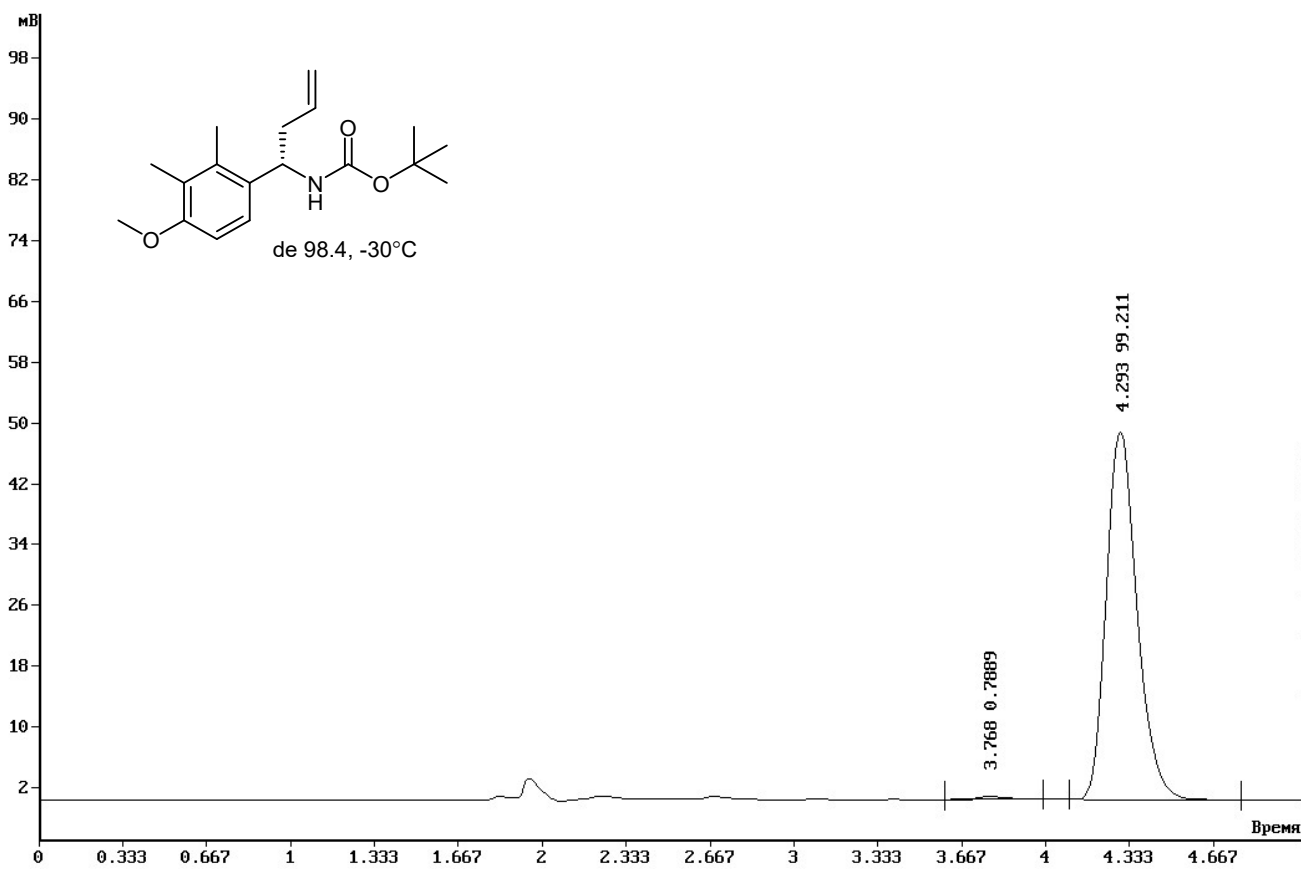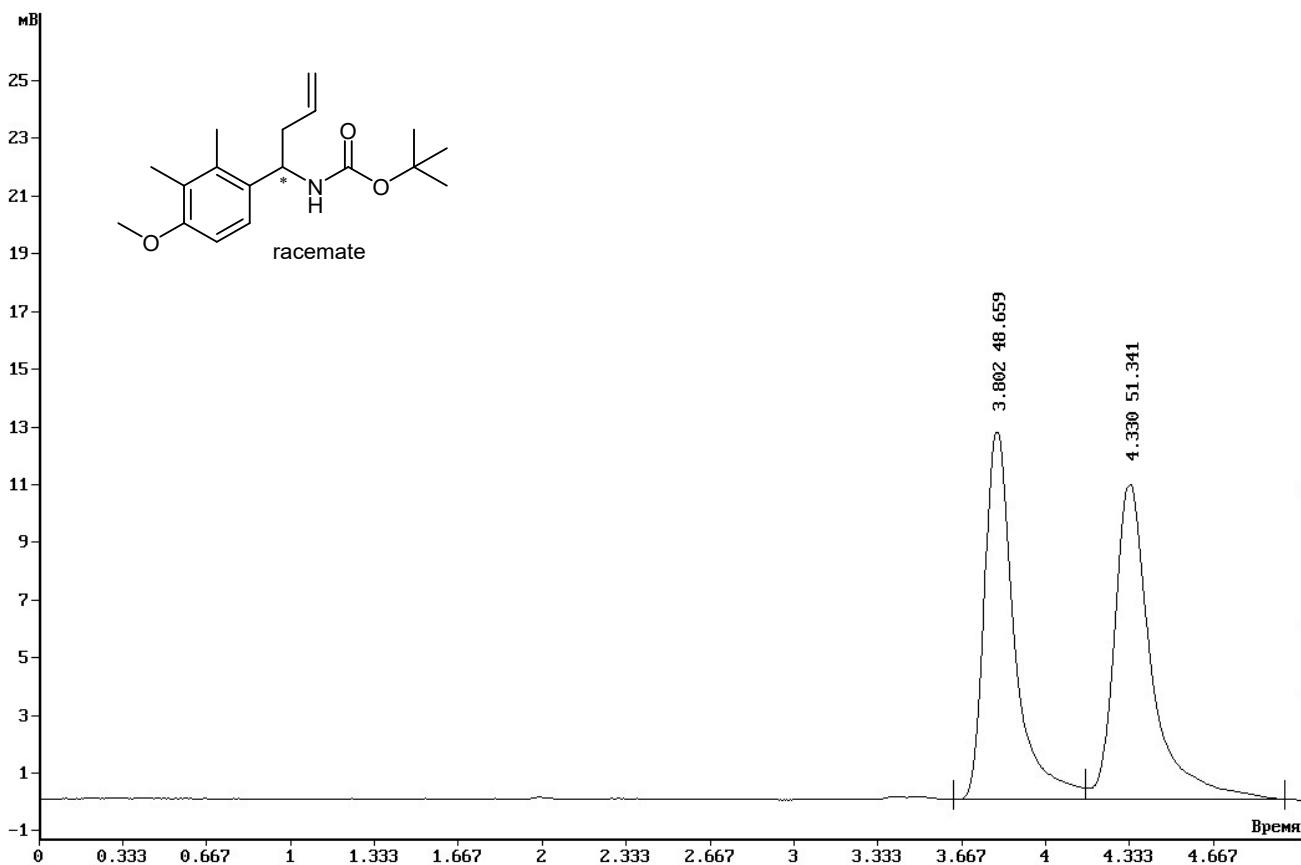

### Enantiomeric analysis of *tert*-butyl (*S*)-(1-(4-chlorophenyl)but-3-en-1-yl)carbamate (6j).

Column Kromasil 3-AmyCoat (150x4.6mm, 5 $\mu$ m), eluent *n*-C<sub>6</sub>H<sub>14</sub>/*iso*-PrOH = 95/5, flow rate 1.0 ml/min, UV 220 nm.

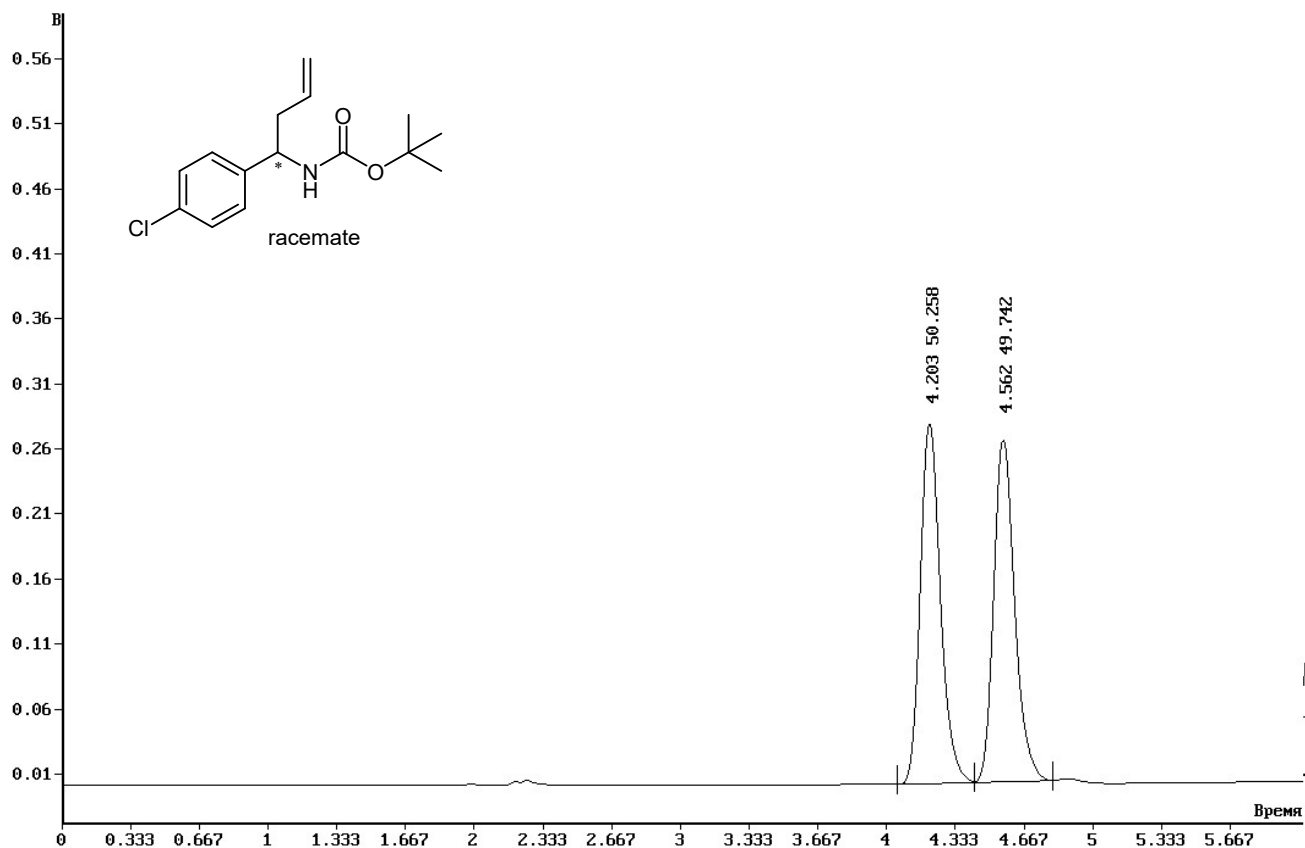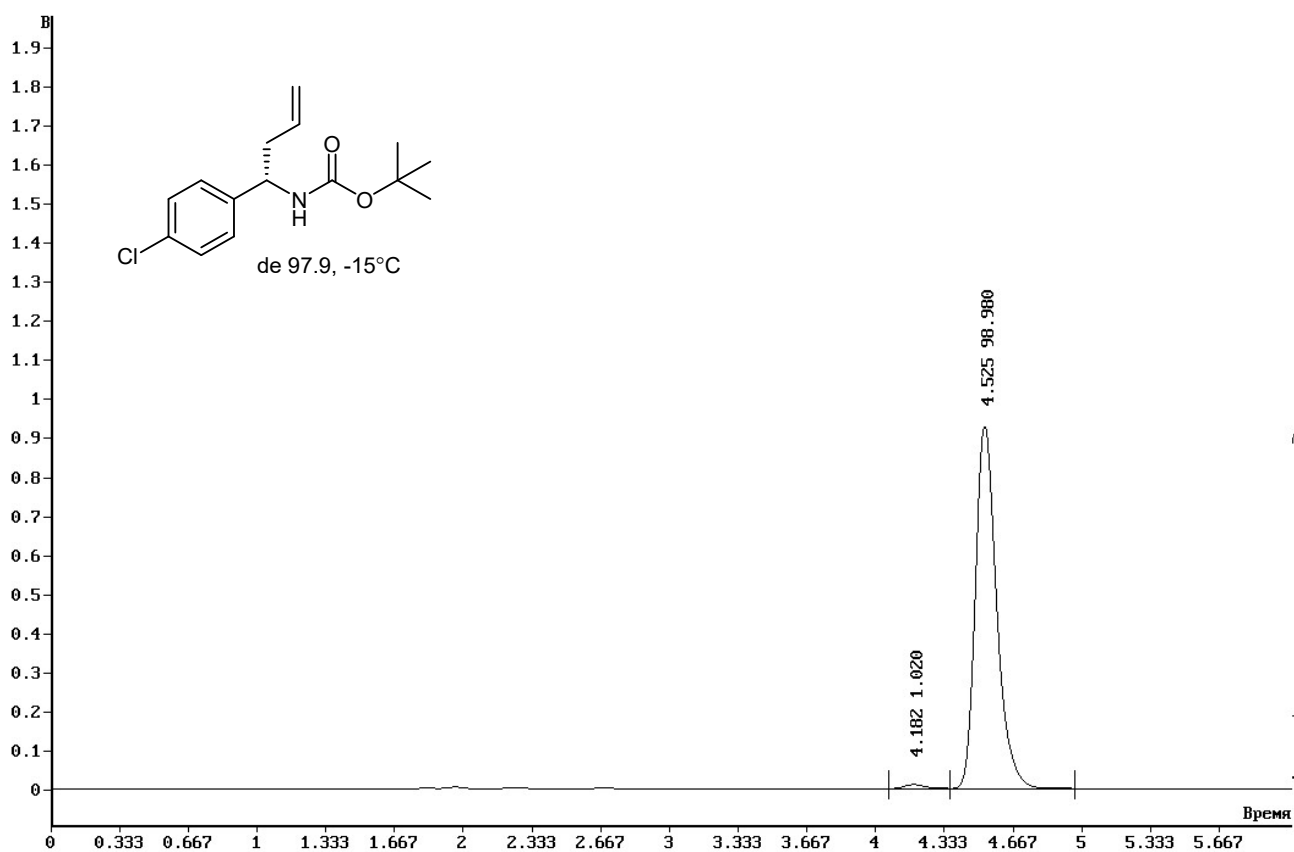

### Enantiomeric analysis of *tert*-butyl (*R*)-(1-phenylhex-5-en-3-yl)carbamate (6k).

Column Kromasil 3-AmyCoat (150x4.6mm, 5 $\mu$ m), eluent *n*-C<sub>6</sub>H<sub>14</sub>/*iso*-PrOH = 95/5, flow rate 1.0 ml/min, UV 220 nm.

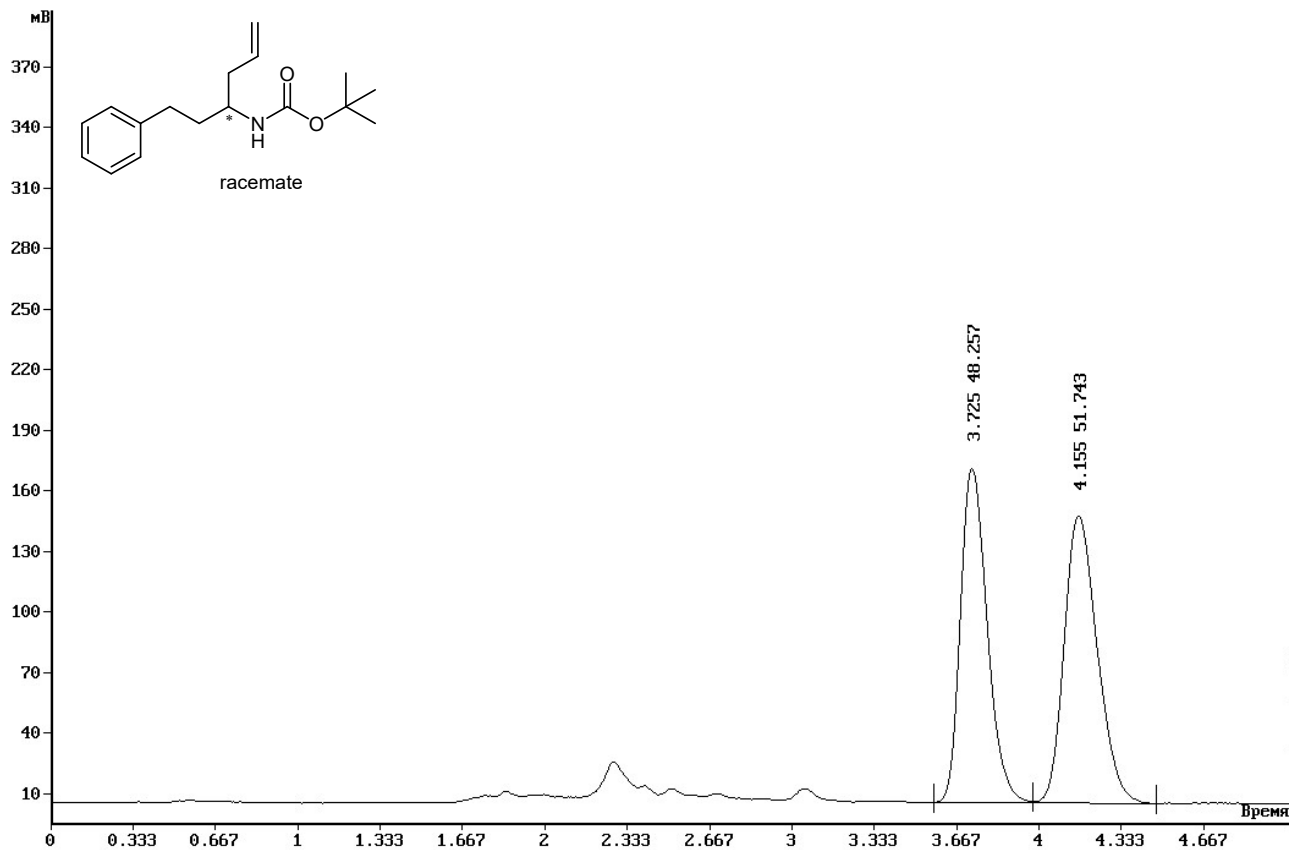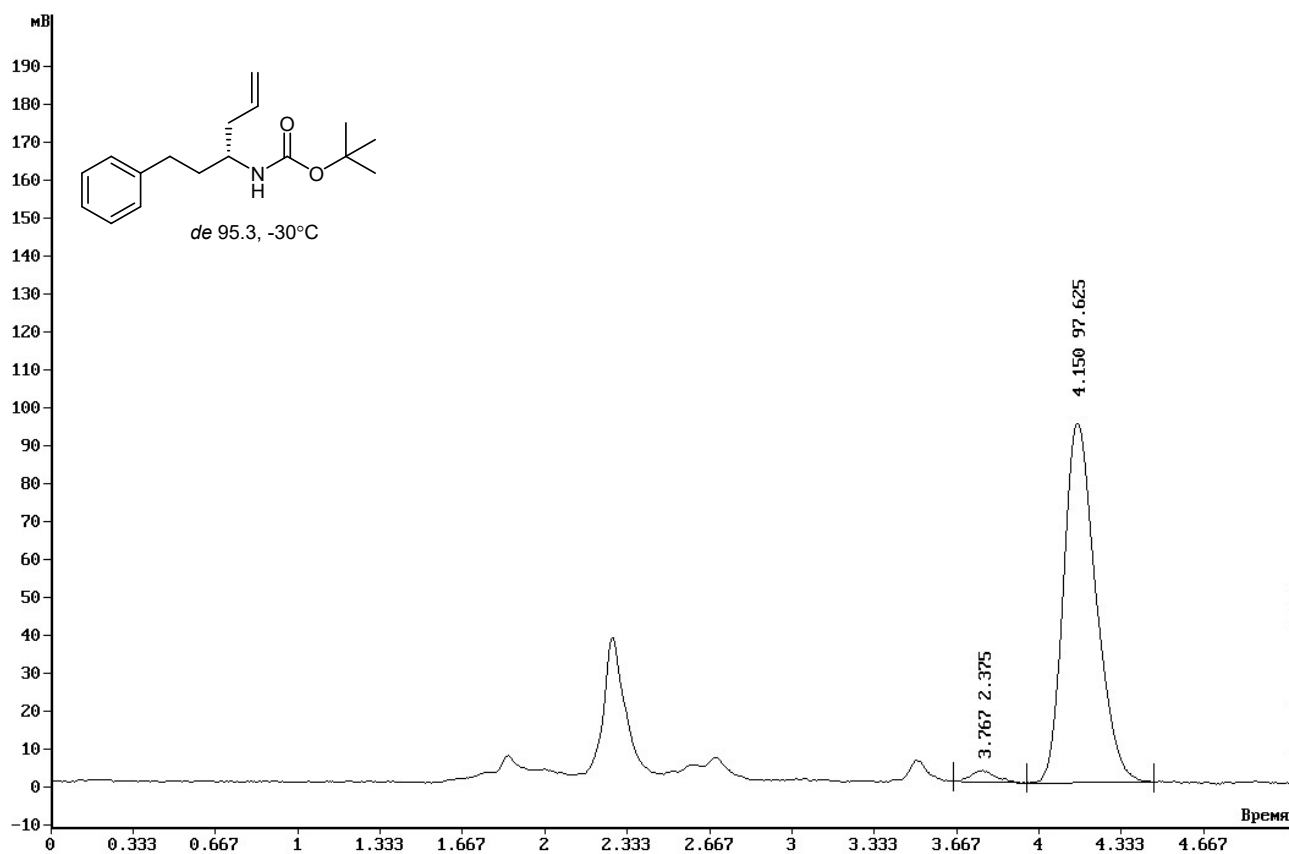

# Enantiomeric analysis of *tert*-butyl (*S,E*)-(1-phenylhexa-1,5-dien-3-yl)carbamate (6l).

Column Kromasil 3-AmyCoat (150x4.6mm, 5 $\mu$ m), eluent *n*-C<sub>6</sub>H<sub>14</sub>/*iso*-PrOH = 95/5, flow rate 1.0 ml/min, UV 256 nm.

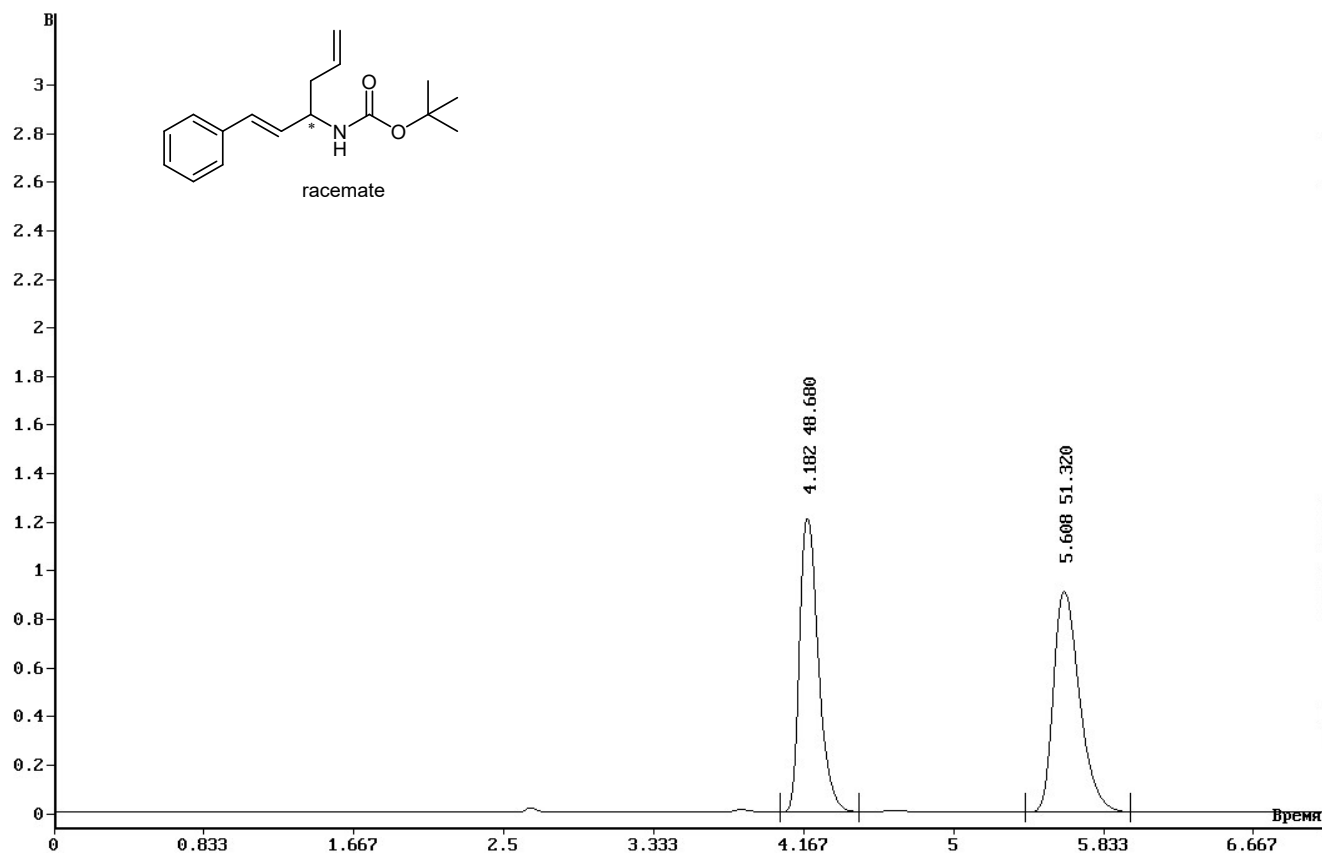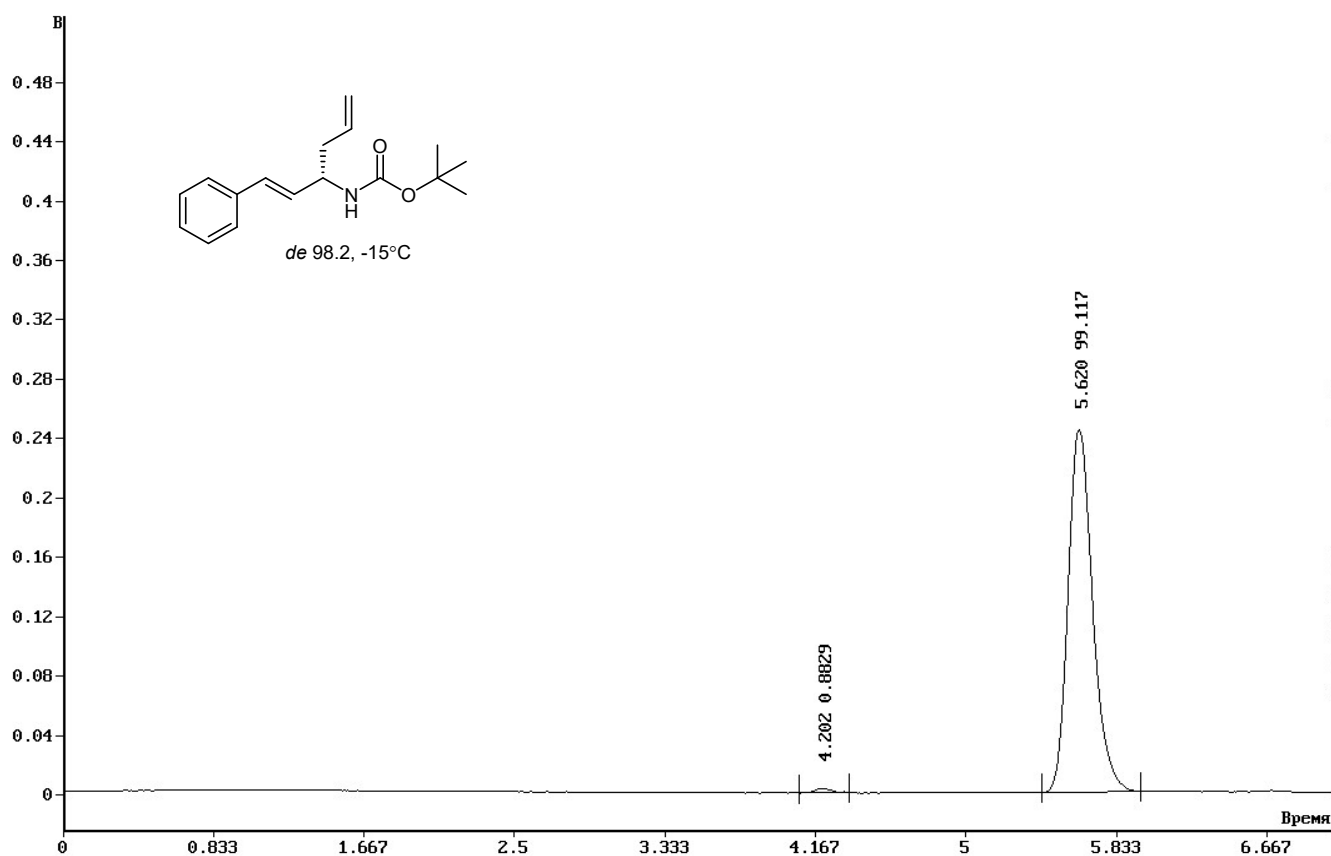

**Enantiomeric analysis of *tert*-butyl (*S*)-(1-(4-methoxynaphthalen-1-yl)but-3-en-1-yl)carbamate (6m).**  
Column Kromasil 3-AmyCoat (150x4.6mm, 5 $\mu$ m), eluent *n*-C<sub>6</sub>H<sub>14</sub>/*iso*-PrOH = 95/5, flow rate 1.0 ml/min, UV 220 nm.

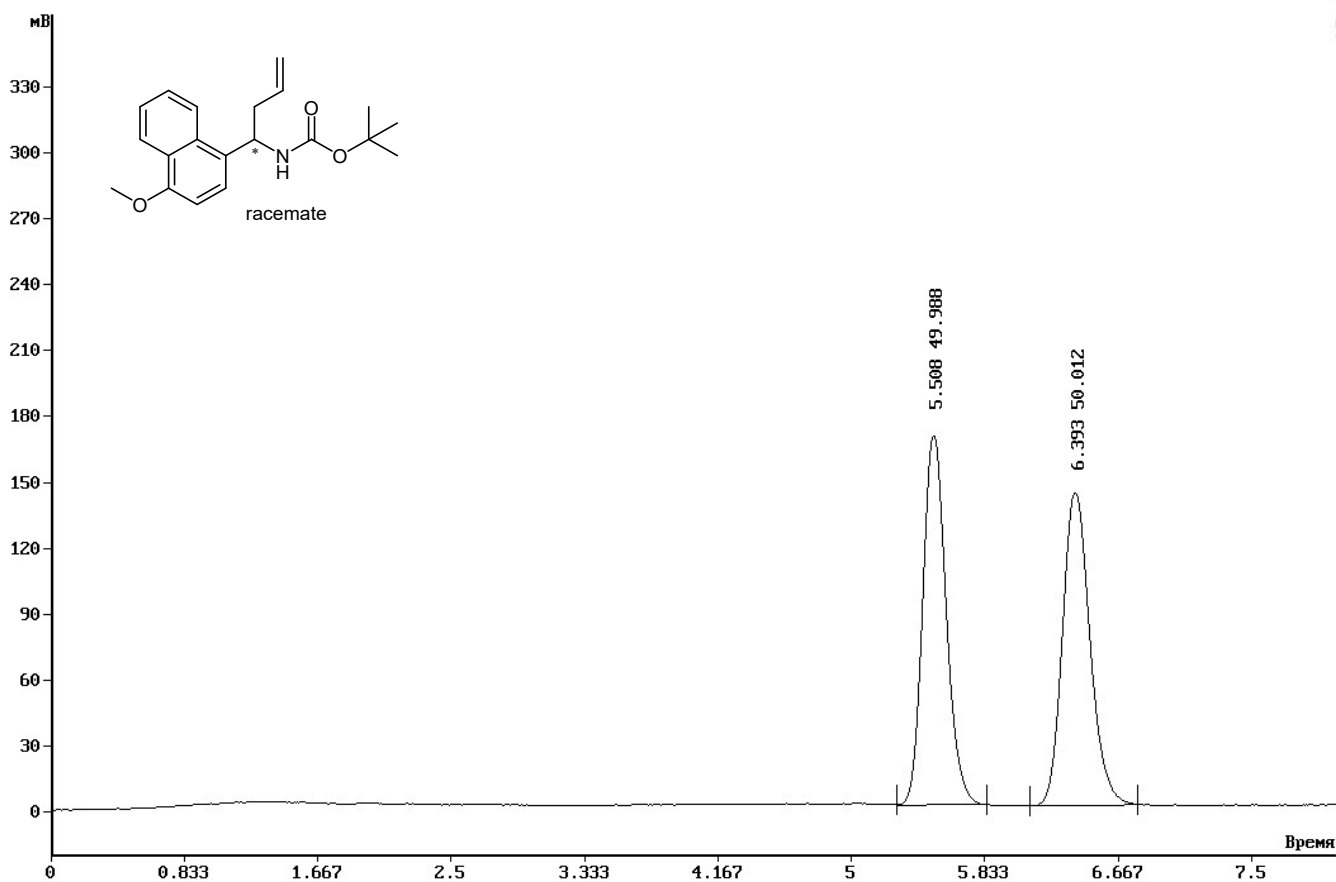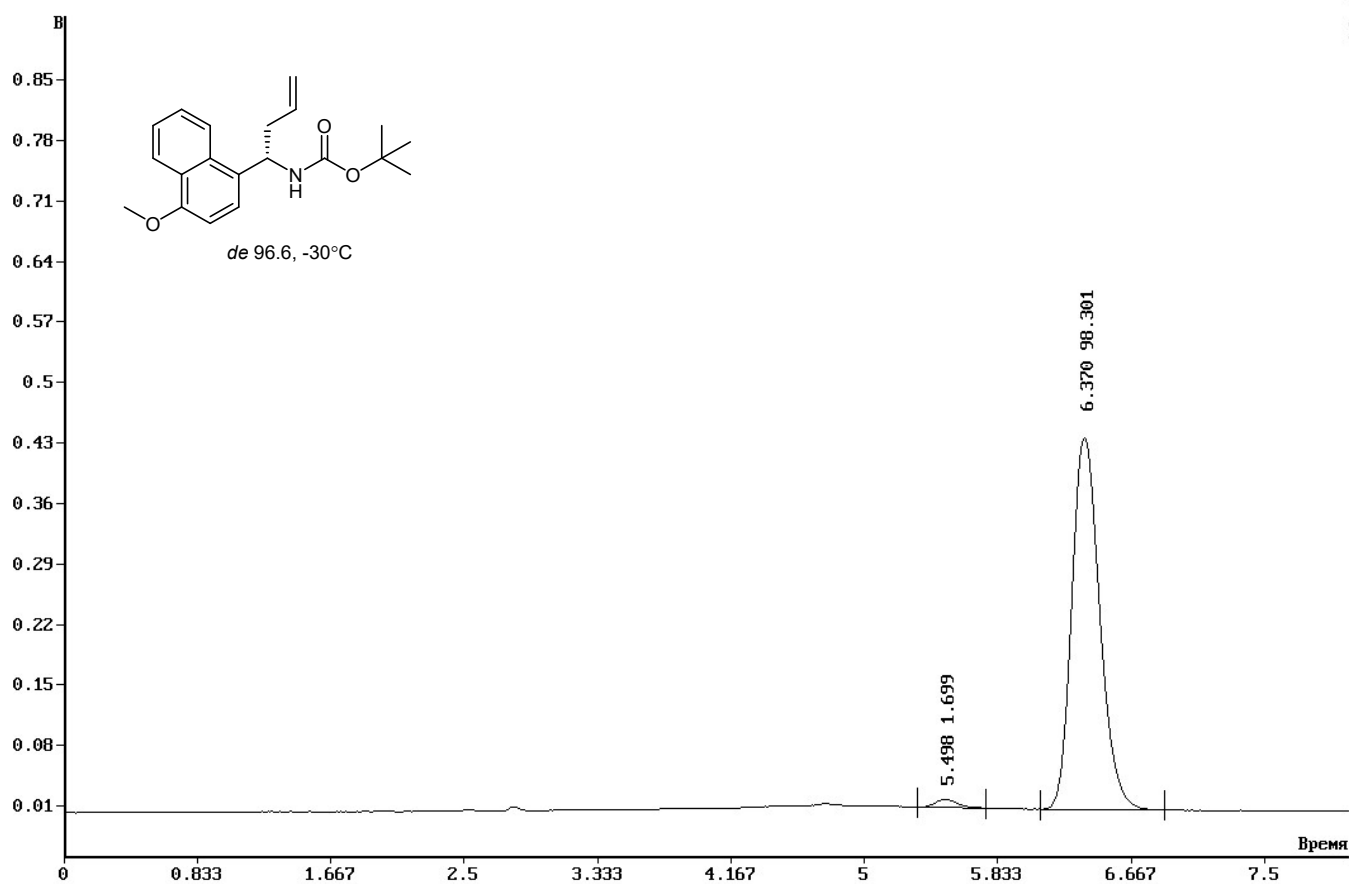

**Enantiomeric analysis of *tert*-butyl (*S*)-(1-(thiophen-2-yl)but-3-en-1-yl)carbamate (6n).**

Column Kromasil 3-AmyCoat (150x4.6mm, 5 $\mu$ m), eluent *n*-C<sub>6</sub>H<sub>14</sub>/*iso*-PrOH = 95/5, flow rate 1.0 ml/min, UV 233 nm.

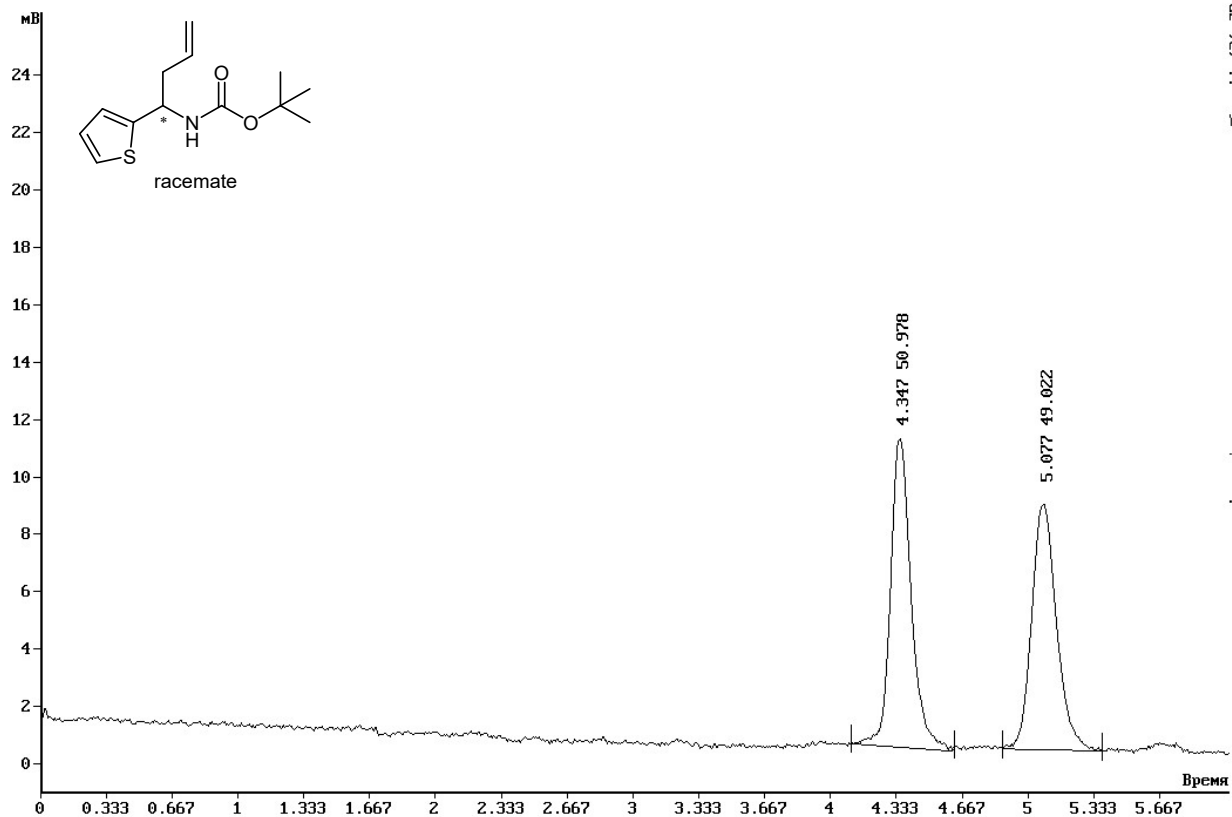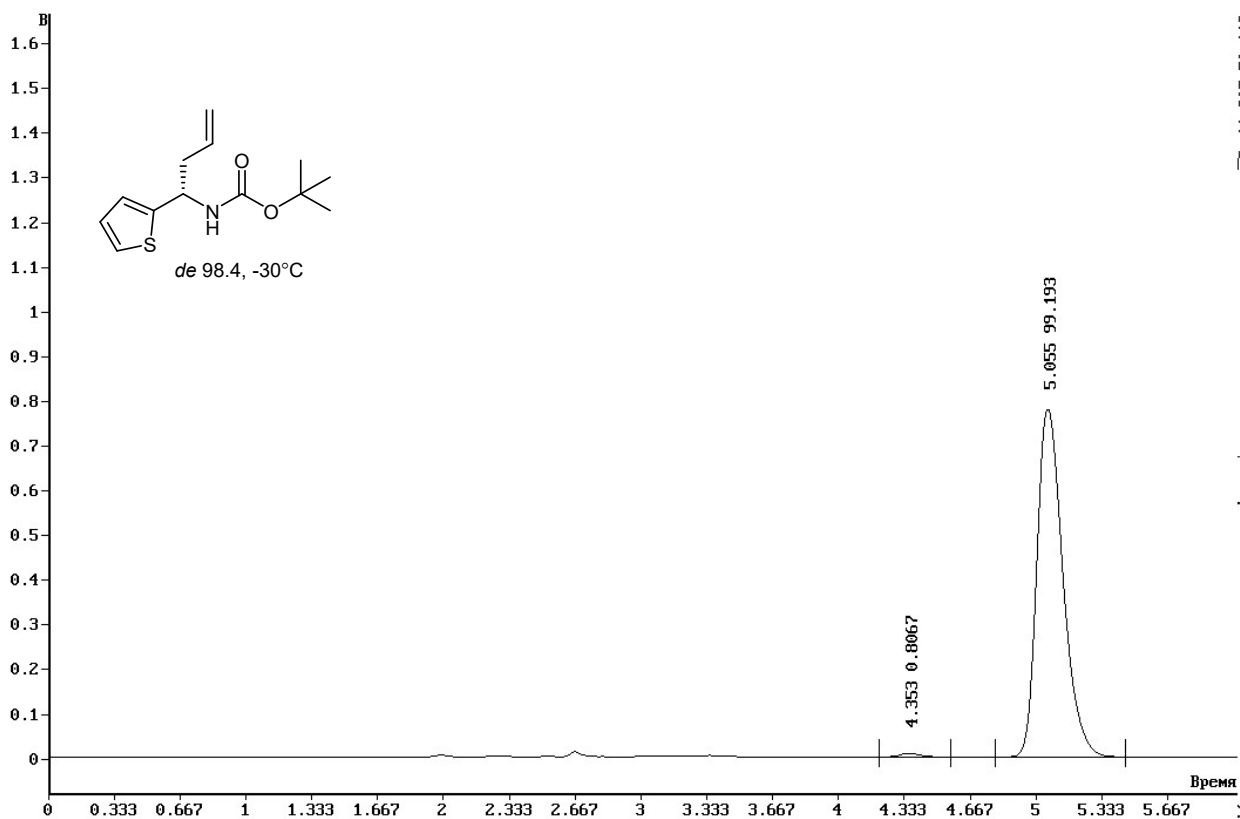

**Enantiomeric analysis of *tert*-butyl (*S*)-(1-(4-nitrophenyl)but-3-en-1-yl)carbamate (6o).**

Column Kromasil 3-AmyCoat (250x4.6mm, 5 $\mu$ m), eluent *n*-C<sub>6</sub>H<sub>14</sub>/*iso*-PrOH = 95/5, flow rate 1.0 ml/min, UV 220 nm.

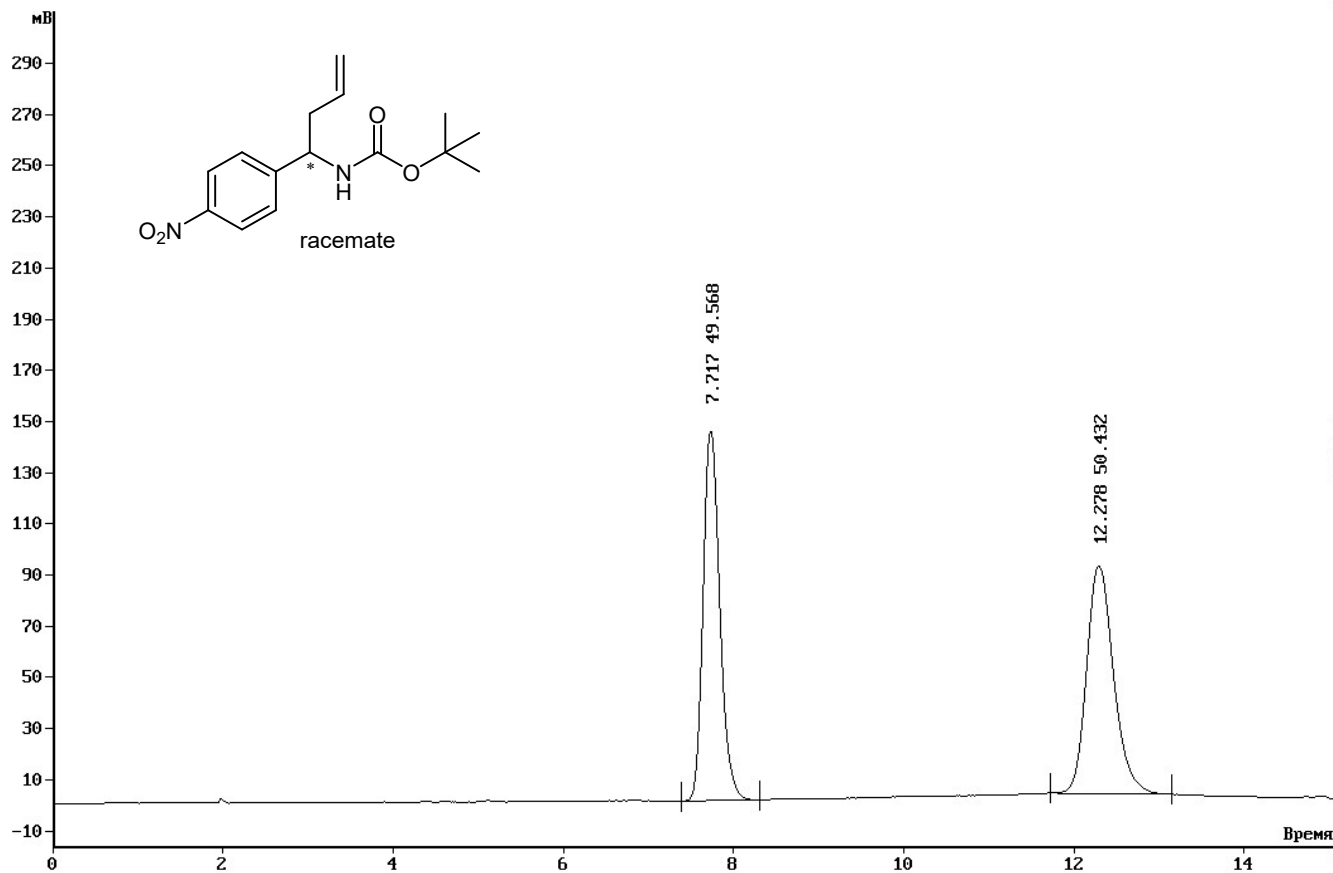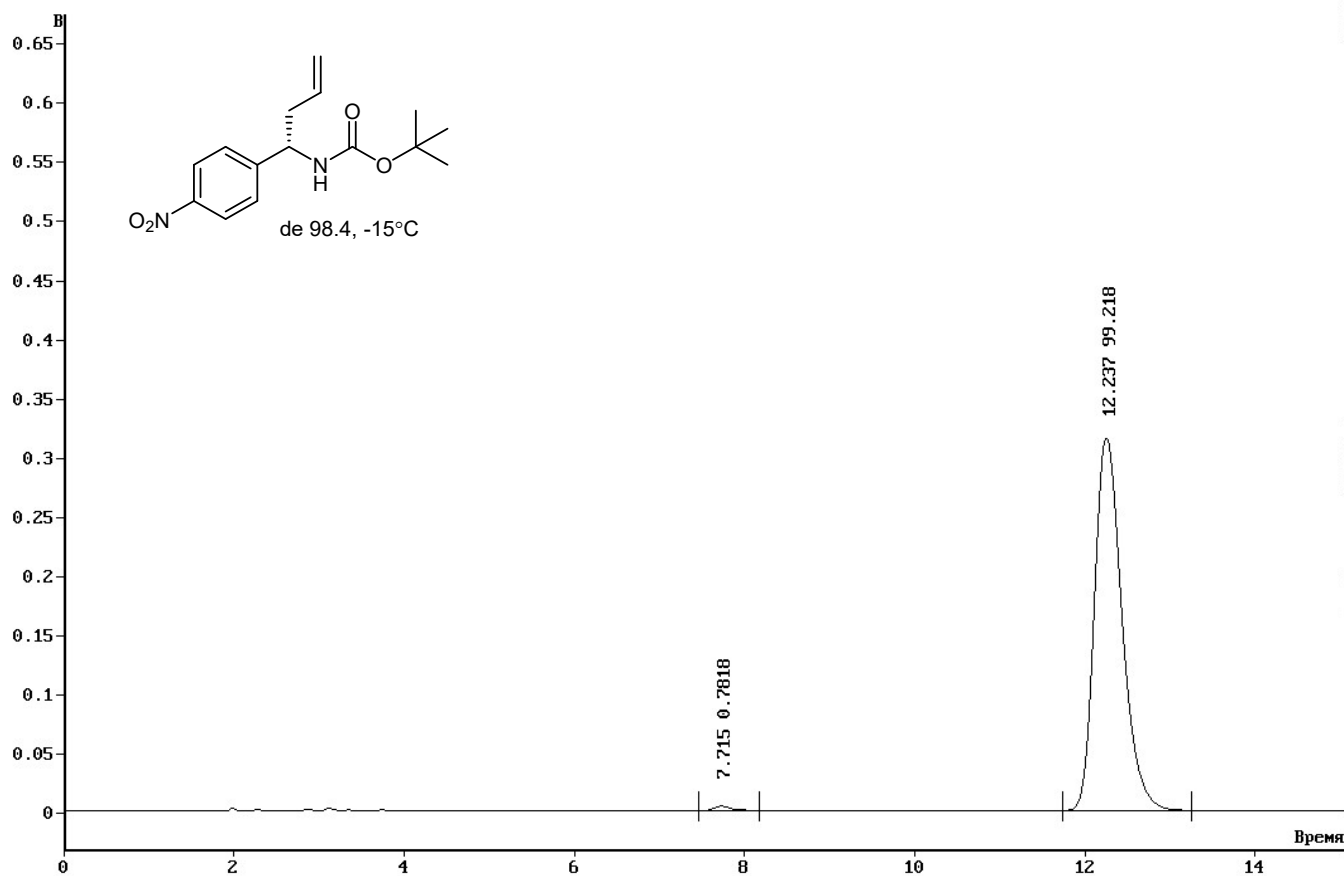

# Enantiomeric analysis of *tert*-butyl (*S*)-(1-(2-hydroxyphenyl)but-3-en-1-yl)carbamate (6q).

Column Kromasil 3-AmyCoat (150x4.6mm, 5 $\mu$ m), eluent *n*-C<sub>6</sub>H<sub>14</sub>/*iso*-PrOH = 98/2, flow rate 0.75 ml/min, UV 220 nm.

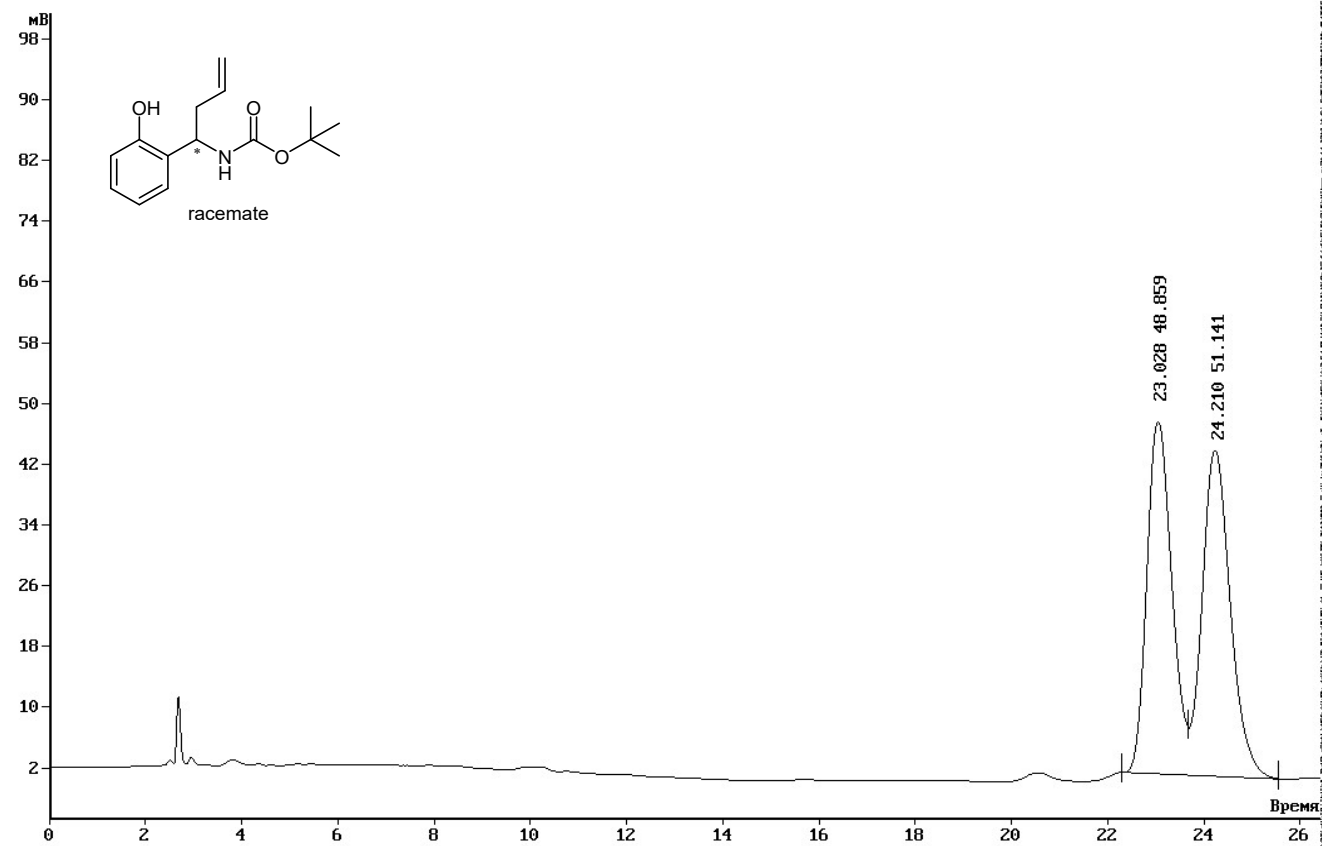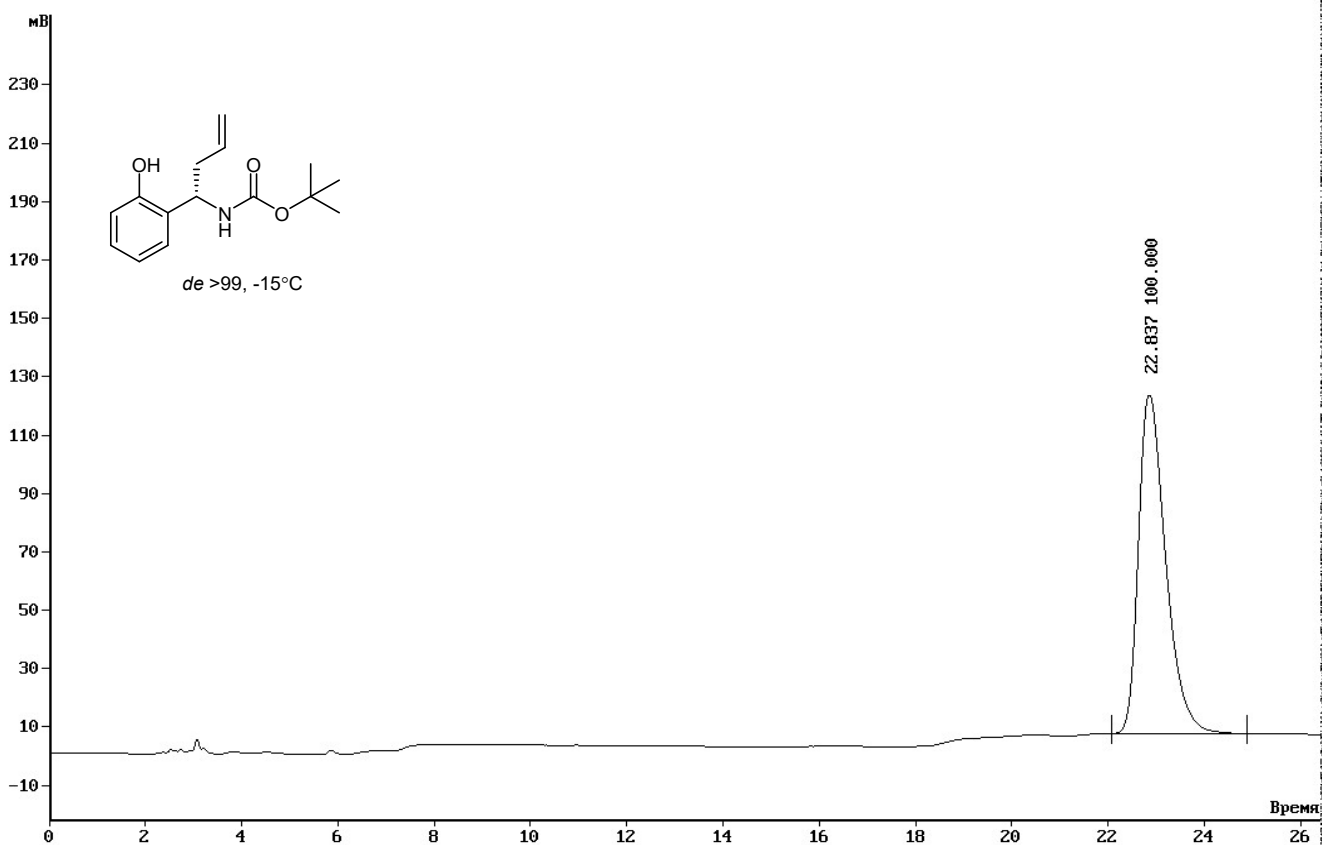



**Enantiomeric analysis of *tert*-butyl (*S*)-(1-(pyridin-4-yl)but-3-en-1-yl)carbamate (6r).**

Column Chiralpak AS-H (250x4.6mm, 5 $\mu$ m), eluent *n*-C<sub>6</sub>H<sub>14</sub>/*iso*-PrOH = 95/5, flow rate 1.0 ml/min, UV 220 nm.

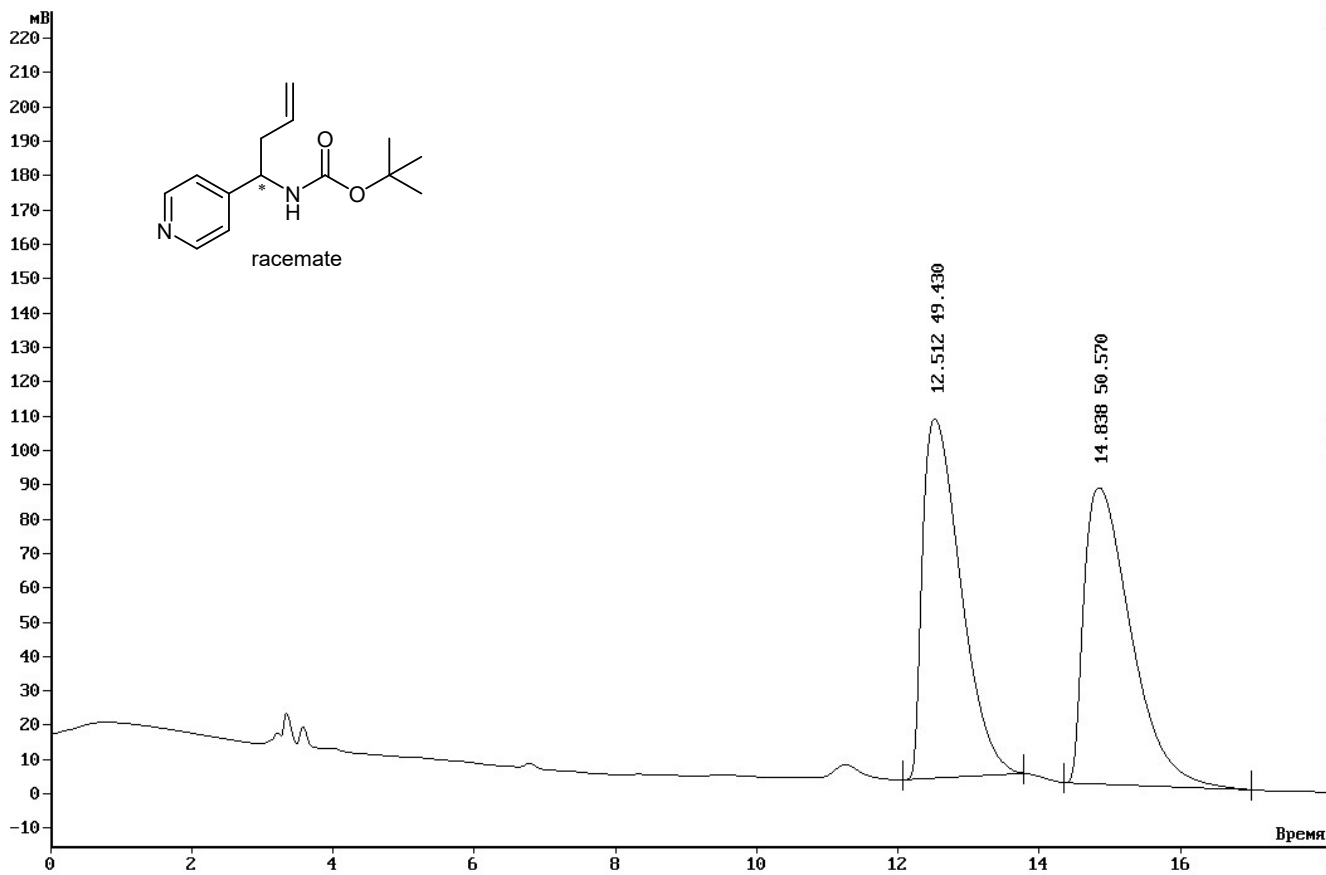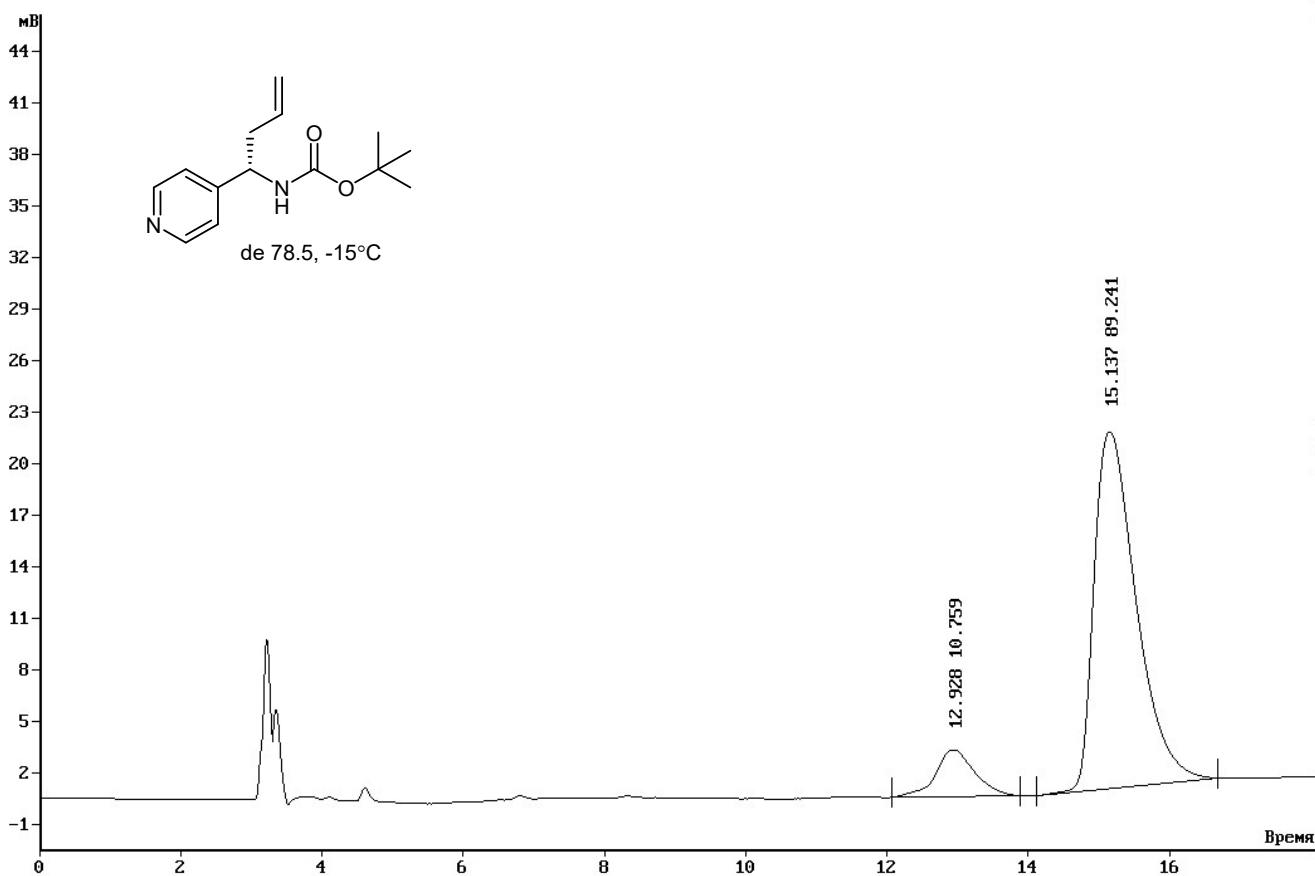

**Enantiomeric analysis of *tert*-butyl (*S*)-(1-(pyridin-3-yl)but-3-en-1-yl)carbamate (6s).**

Column Chiralpak AS-H (250x4.6mm, 5 $\mu$ m), eluent *n*-C<sub>6</sub>H<sub>14</sub>/*iso*-PrOH = 95/5, flow rate 1.0 ml/min, UV 220 nm.

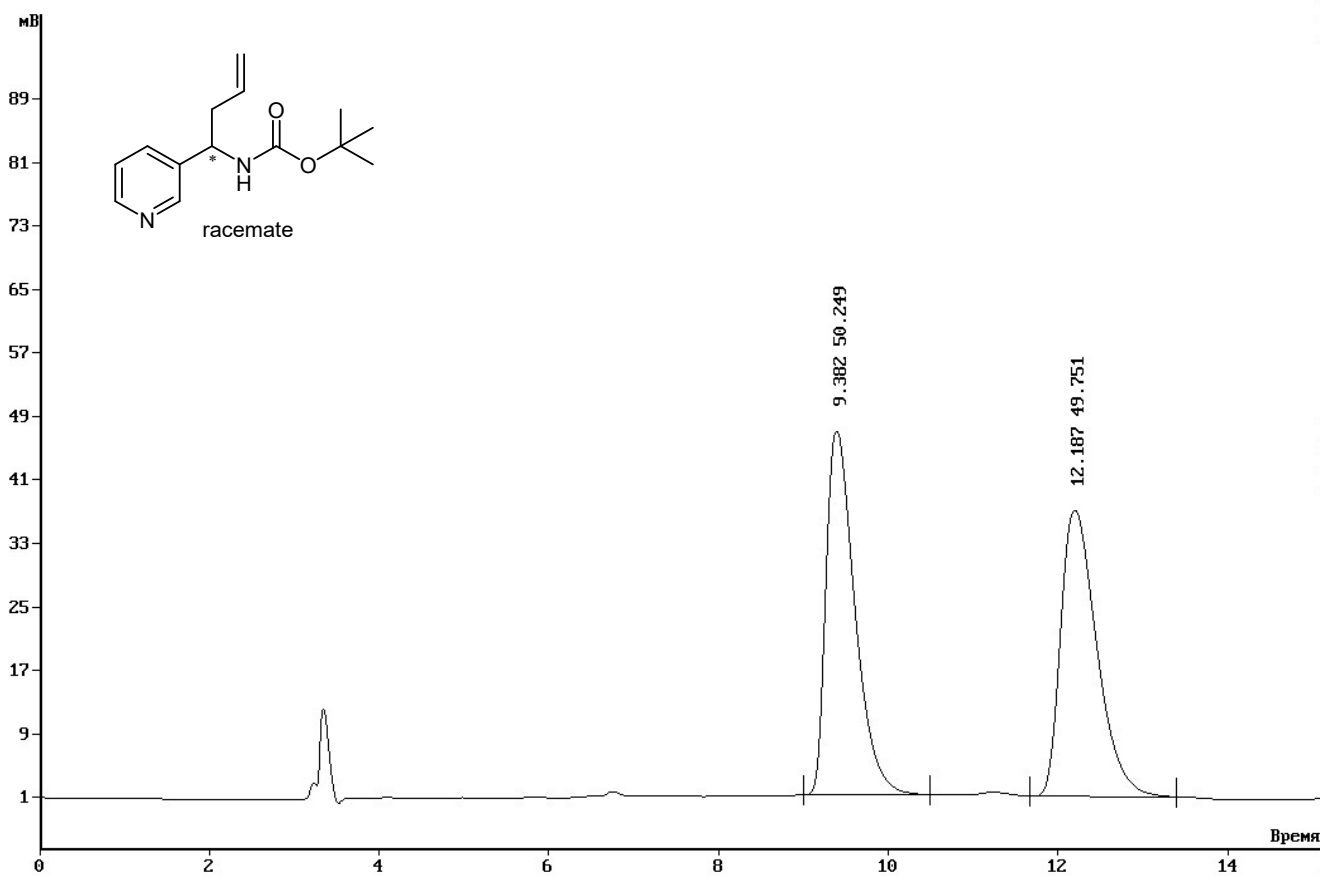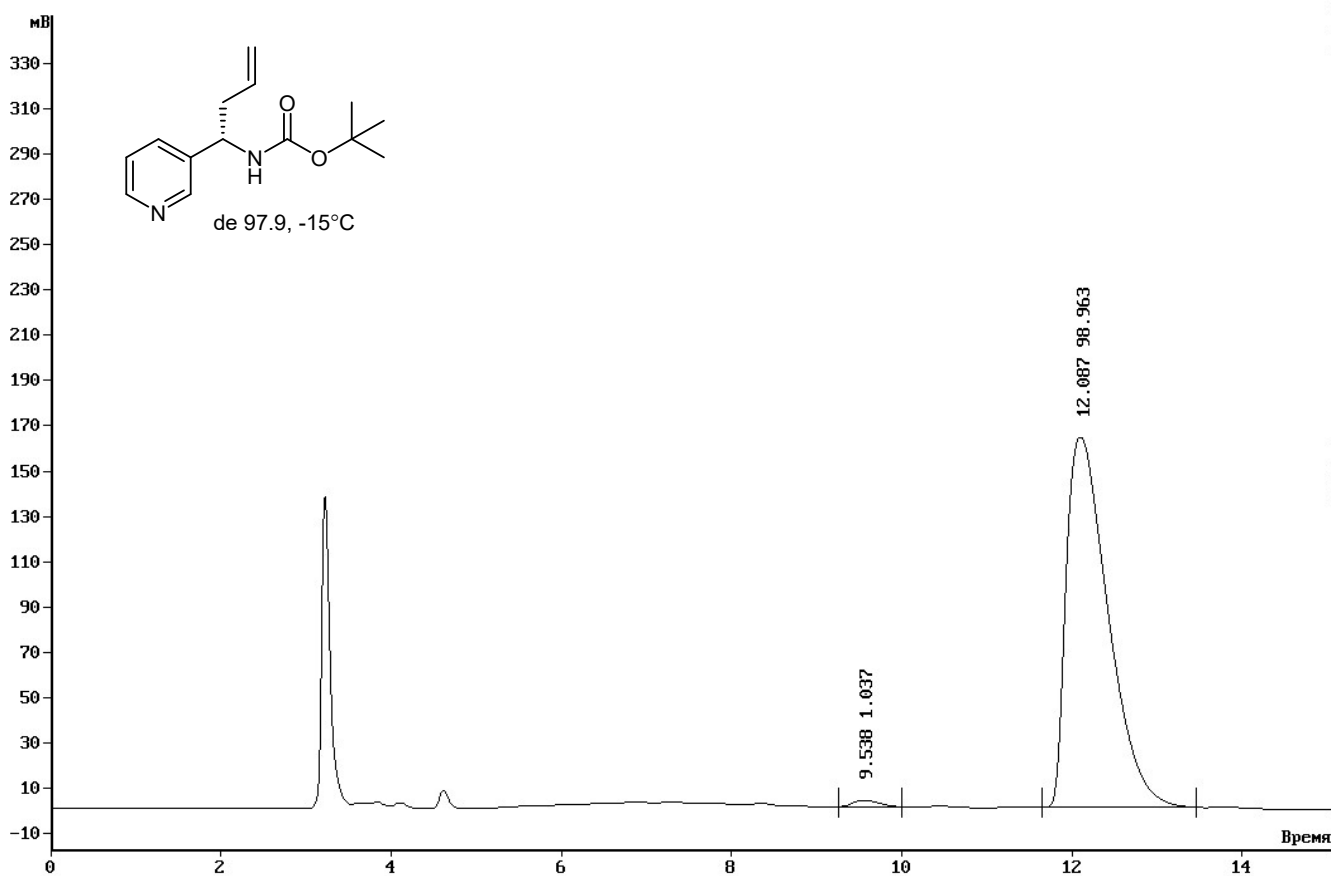

**Enantiomeric analysis of *tert*-butyl (*S*)-(1-(6-methylpyridin-2-yl)but-3-en-1-yl)carbamate (6u).**

Column Kromasil 3-AmyCoat (150x4.6mm, 5 $\mu$ m), eluent *n*-C<sub>6</sub>H<sub>14</sub>/*iso*-PrOH = 95/5, flow rate 1.0 ml/min, UV 220 nm.

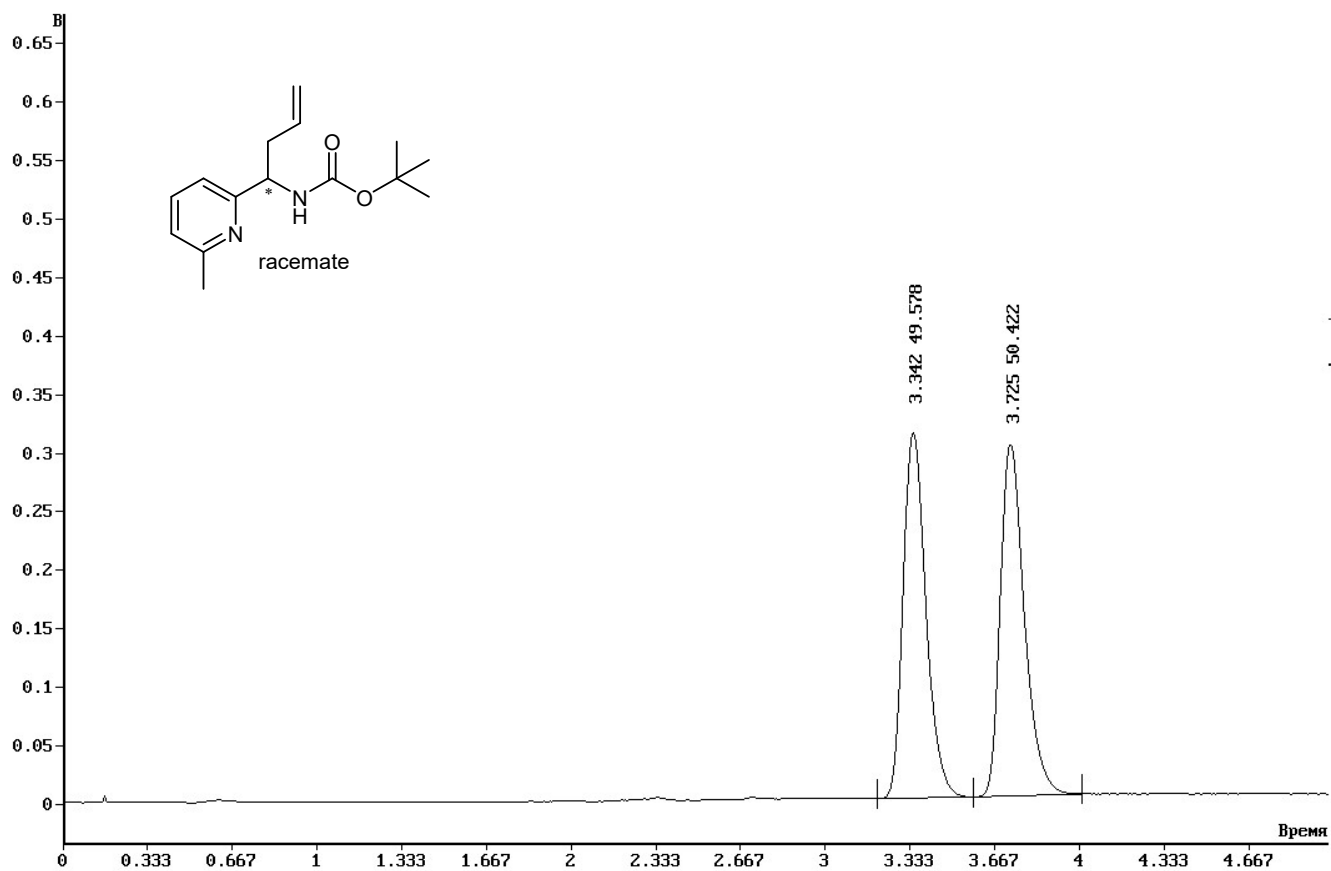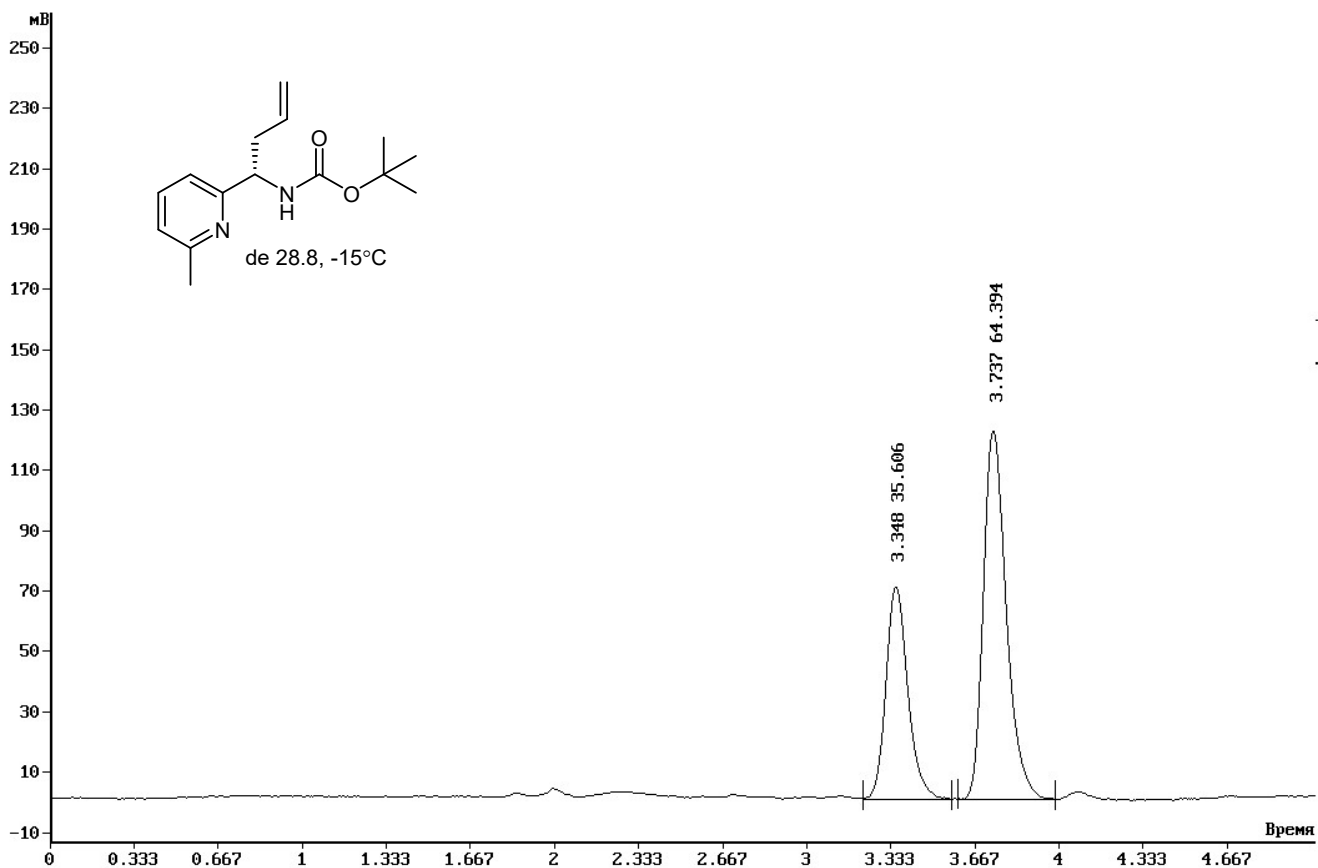

# Enantiomeric analysis of *tert*-butyl (*S*)-(1-(1-ethyl-1*H*-pyrazol-4-yl)but-3-en-1-yl)carbamate (6v).

Column ASTEC ChiraleDEX (150x4.6mm, 5 $\mu$ m), eluent *n*-C<sub>6</sub>H<sub>14</sub>/*iso*-PrOH = 98/2, flow rate 1.0 ml/min, UV 220 nm.

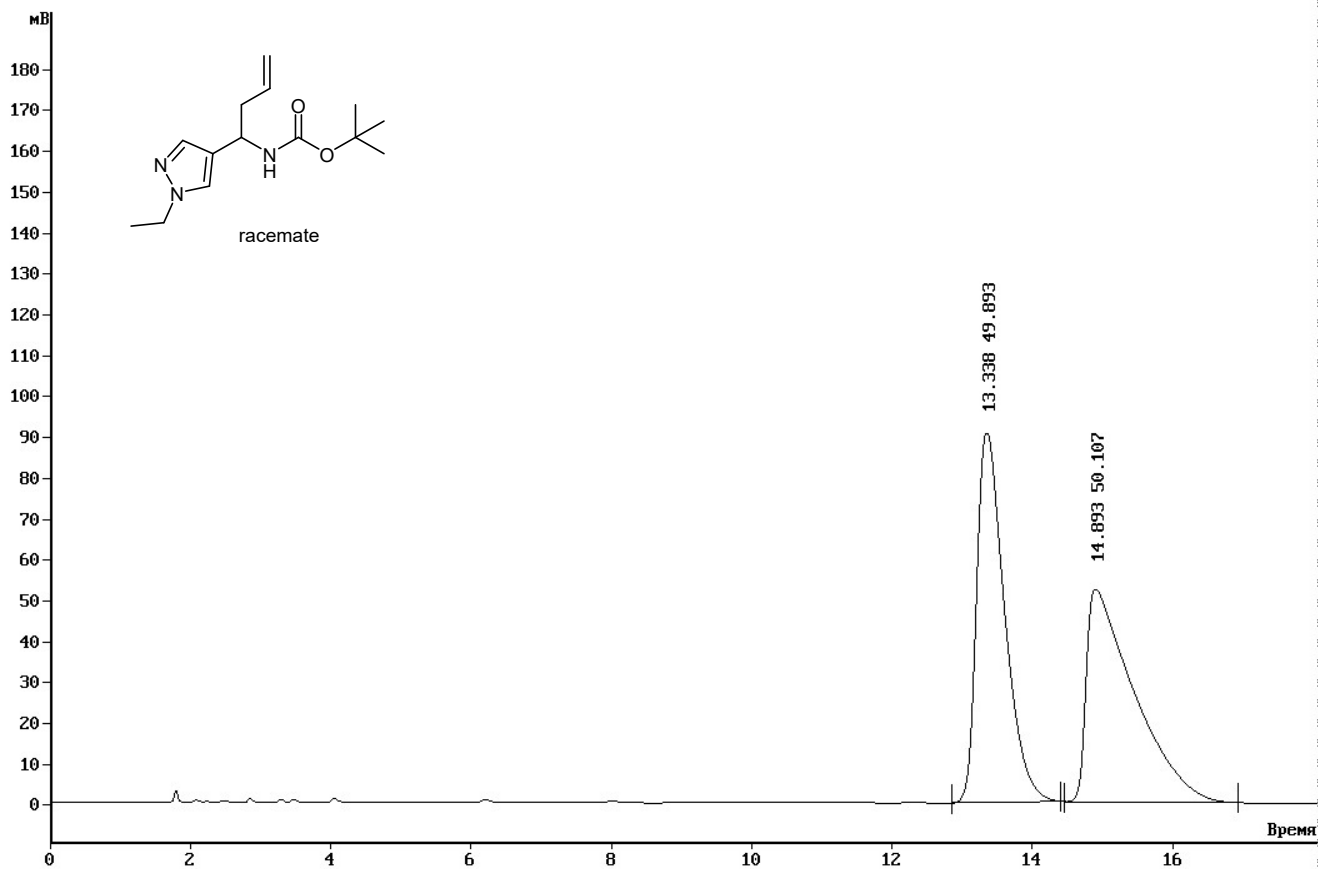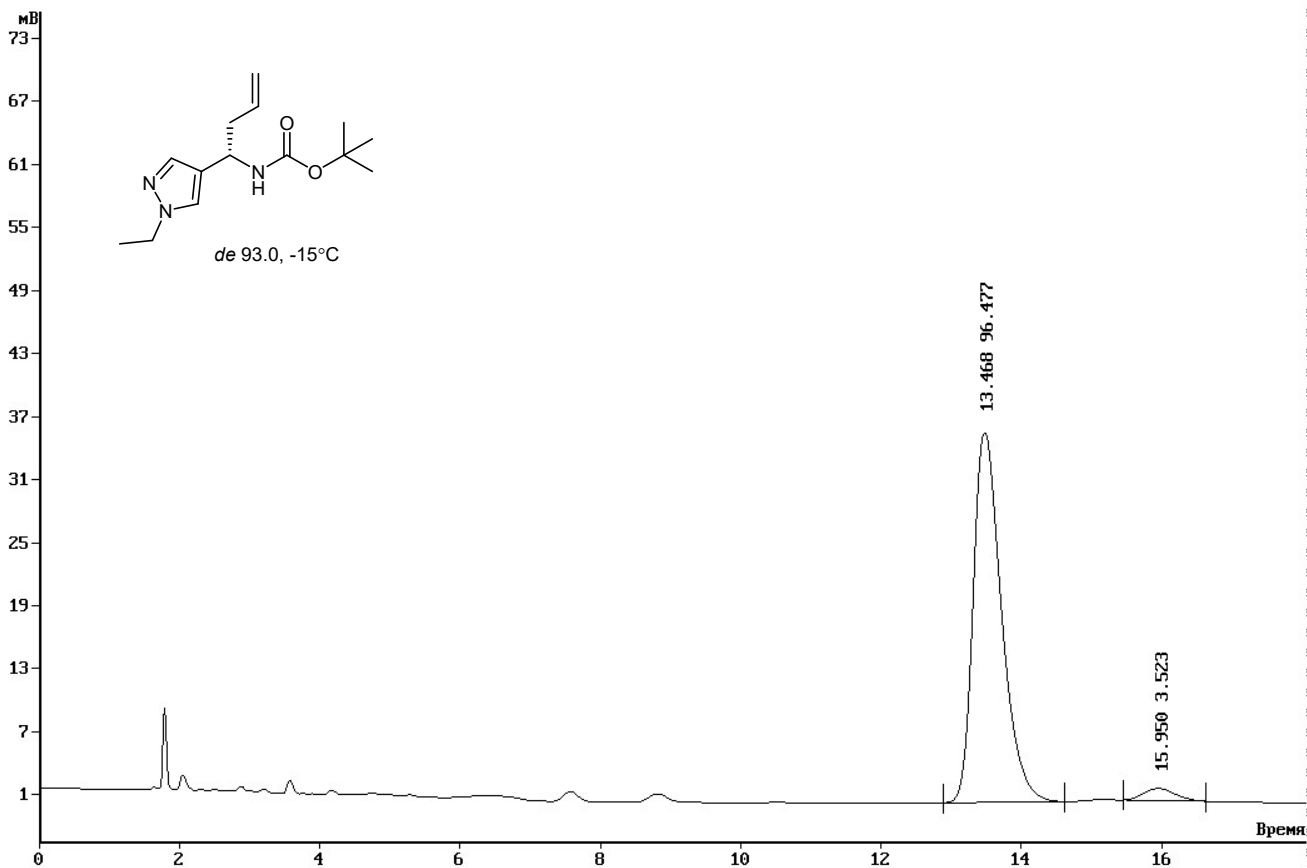

# Enantiomeric analysis of *tert*-butyl (*S*)-(1-(1-phenyl-1*H*-pyrazol-4-yl)but-3-en-1-yl)carbamate (6w).

Column Kromasil 3-AmyCoat (150x4.6mm, 5 $\mu$ m), eluent *n*-C<sub>6</sub>H<sub>14</sub>/*iso*-PrOH = 95/5, flow rate 1.0 ml/min, UV 220 nm.

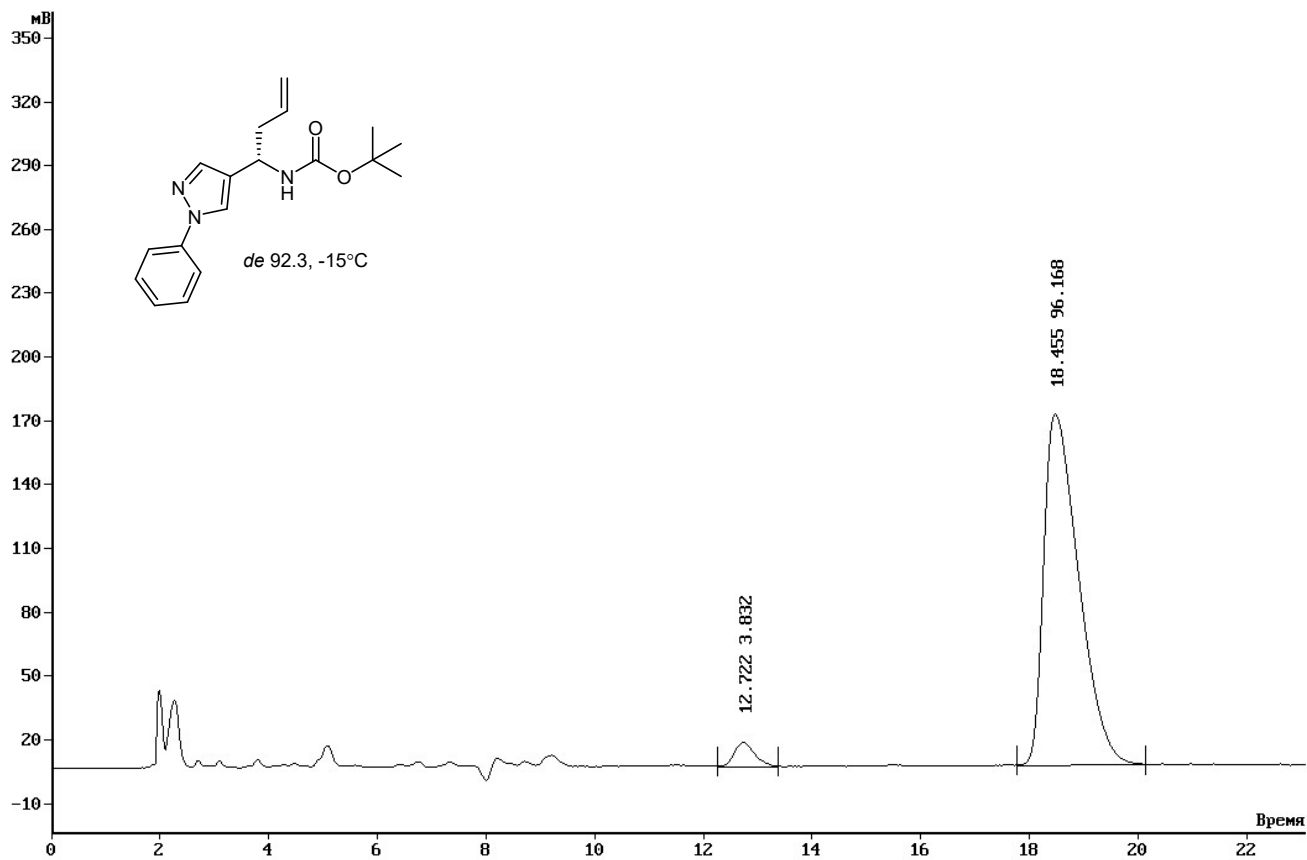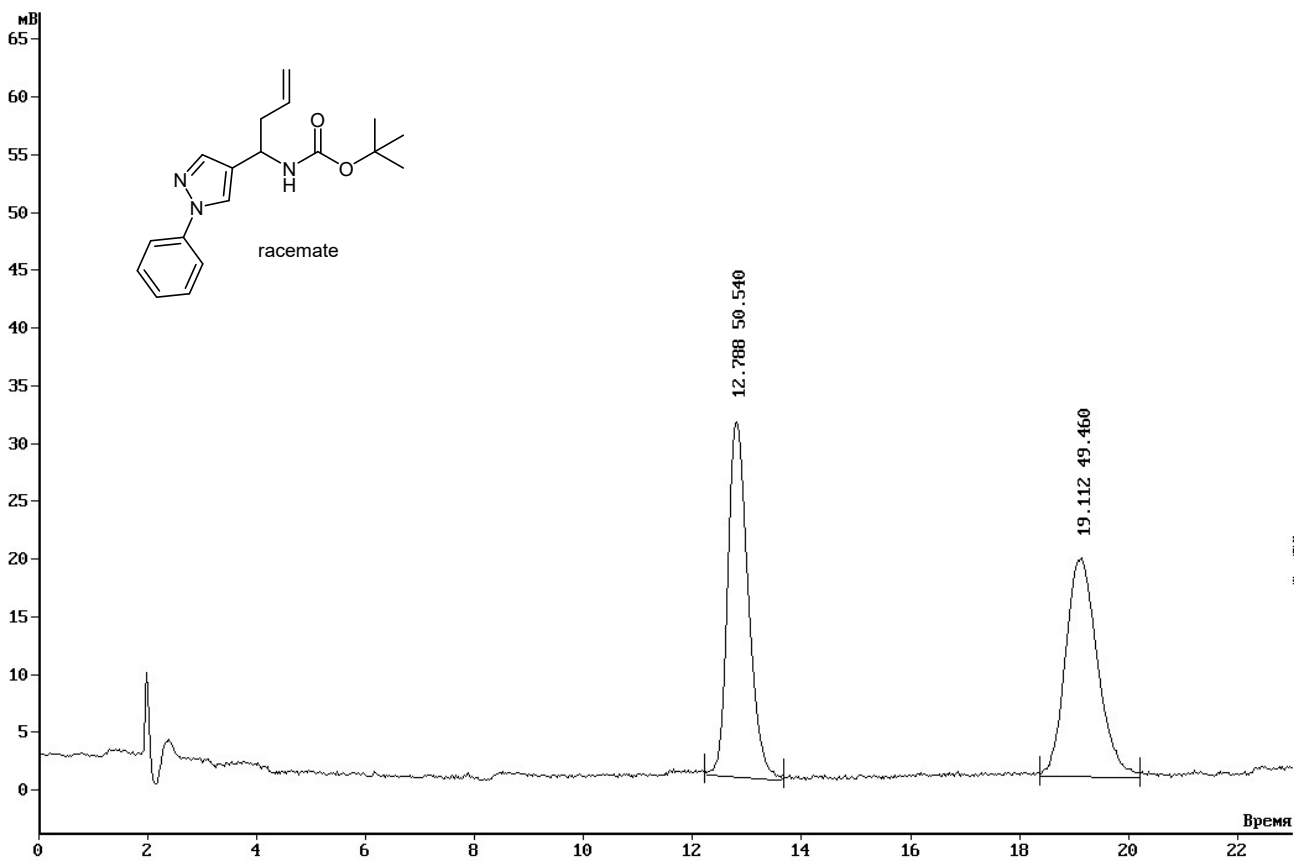

## Rate constant determination tables and plots

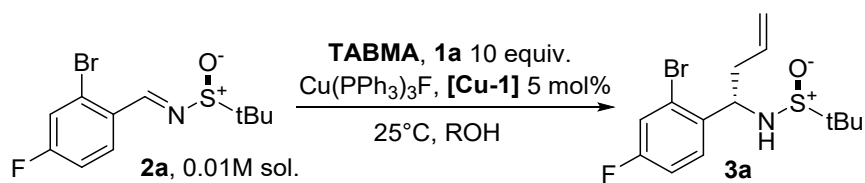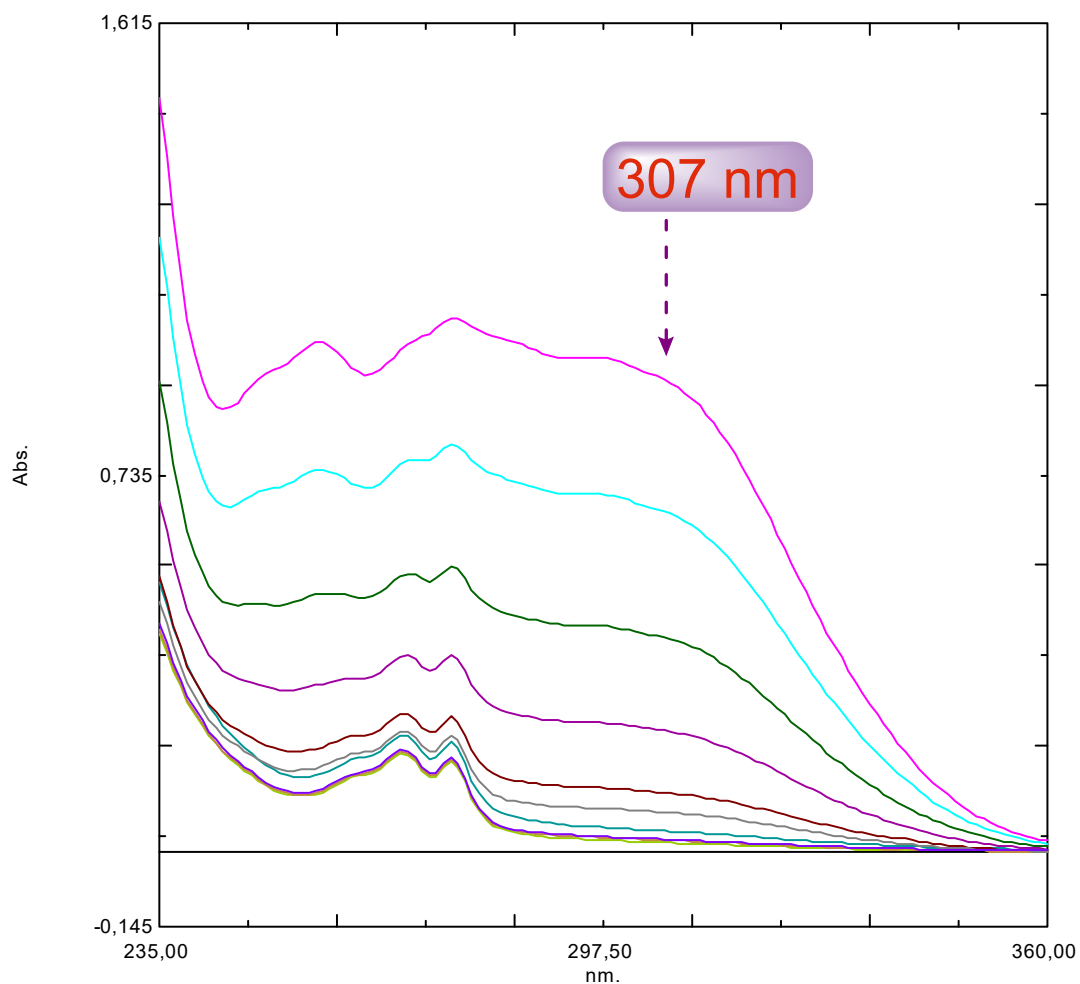

### Calibration curve of imine **2a** in *i*PrOH

| Nº | C, $\mu$ M | A <sup>307</sup> |
|----|------------|------------------|
| 0  | 0          | 0                |
| 1  | 16.7       | 0.153            |
| 2  | 33.3       | 0.298            |
| 3  | 66.7       | 0.584            |
| 4  | 100.0      | 0.845            |
| 5  | 133.3      | 1.123            |
| 6  | 166.7      | 1.343            |
| 7  | 191.7      | 1.603            |
| 8  | 216.7      | 1.801            |
| 9  | 233.3      | 1.997            |
| 10 | 250.0      | 2.139            |

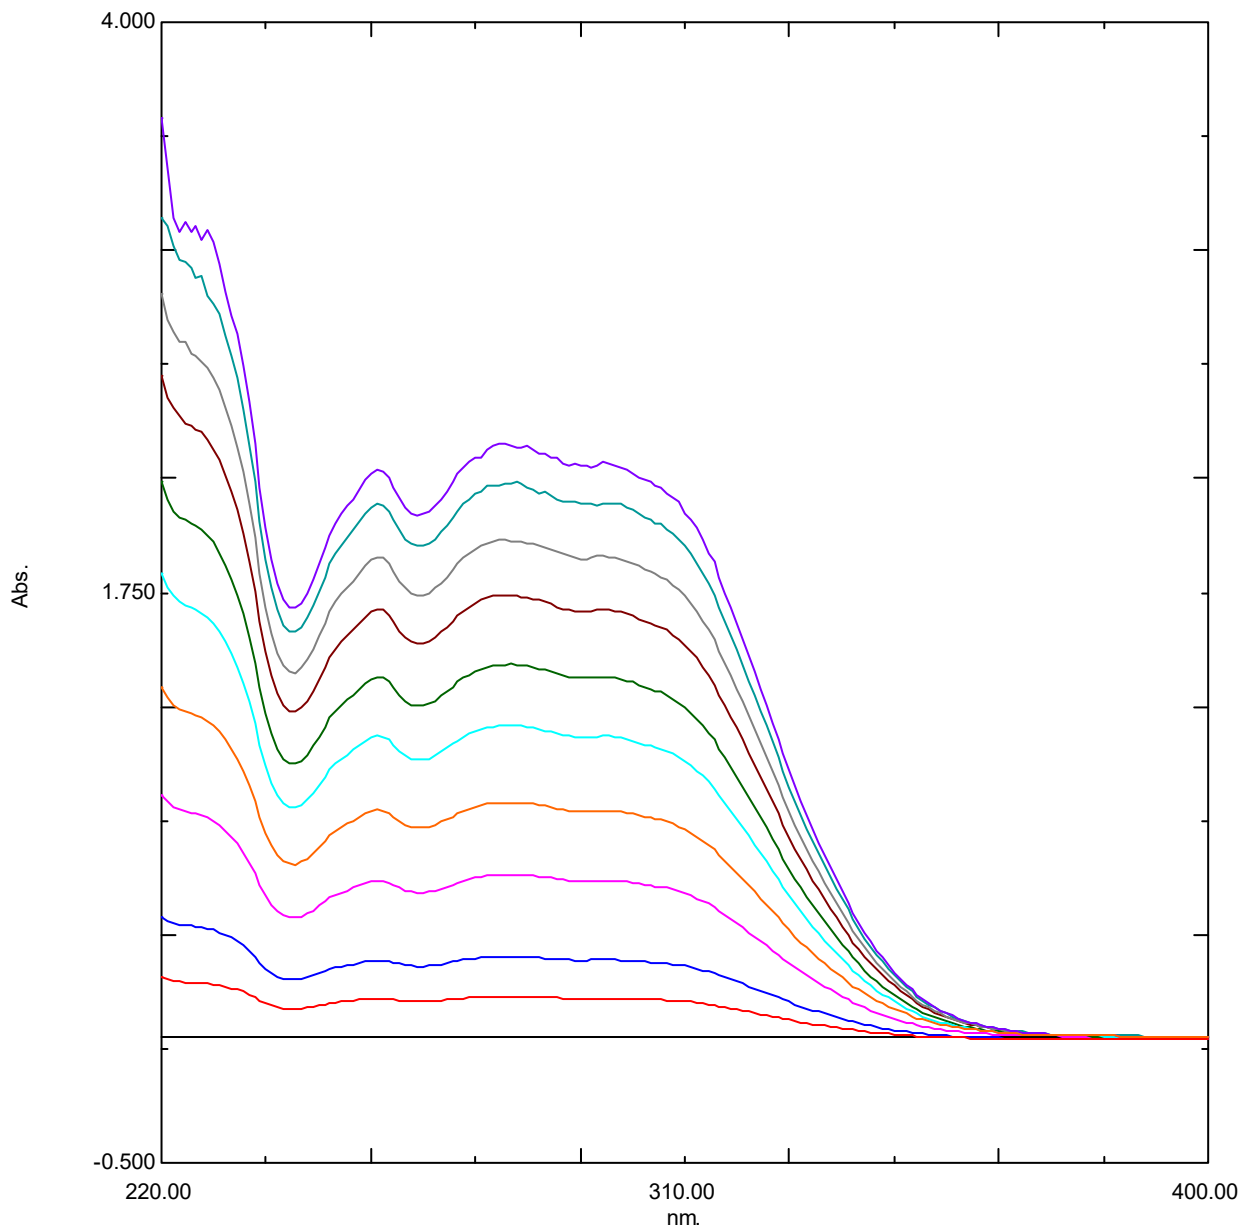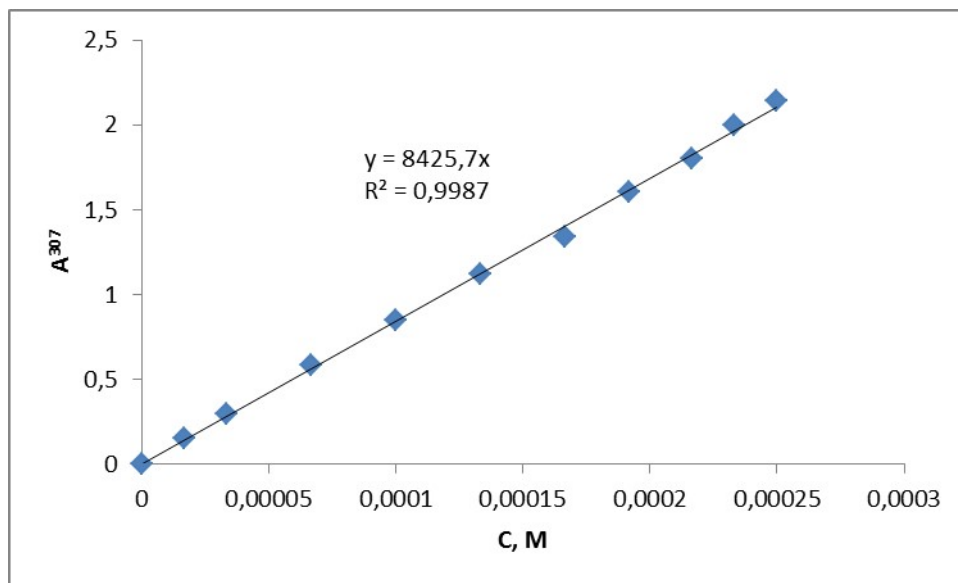

$$\epsilon^{307} = 8425 \pm 225 \text{ cm}^{-1}\text{M}^{-1}$$

## Rate constants of allylation of imine **2a** with **1a** in alcohols (Table 1 of the main text)

### • 2-Propanol

Conditions of experiment: 2Br-4F-Ph Ellman's imine **2a** (200  $\mu$ l, 0.04 M), 5 mol% Cu(PPh<sub>3</sub>)<sub>3</sub>F\*2EtOH [**Cu-1**] (200  $\mu$ l, 0.002 M), 10 eq. TABMA **1a** (400  $\mu$ l, 0.2 M), solvent – *i*PrOH, T = 25.0 °C.

| N <sup>o</sup> | A <sup>307</sup> | t, sec     | c, M   | lnC     |
|----------------|------------------|------------|--------|---------|
| 0              | 1,386            | 0          | 0,0100 | -4,6017 |
| 1              | 0,718            | 15         | 0,0052 | -5,2594 |
| 2              | 0,449            | 30         | 0,0033 | -5,7288 |
| 3              | 0,278            | 45         | 0,0020 | -6,2082 |
| 4              | 0,177            | 60         | 0,0013 | -6,6597 |
| 5              | 0,112            | 75         | 0,0008 | -7,1173 |
| 6              | 0,047            | <b>900</b> | 0,0003 | -7,9857 |

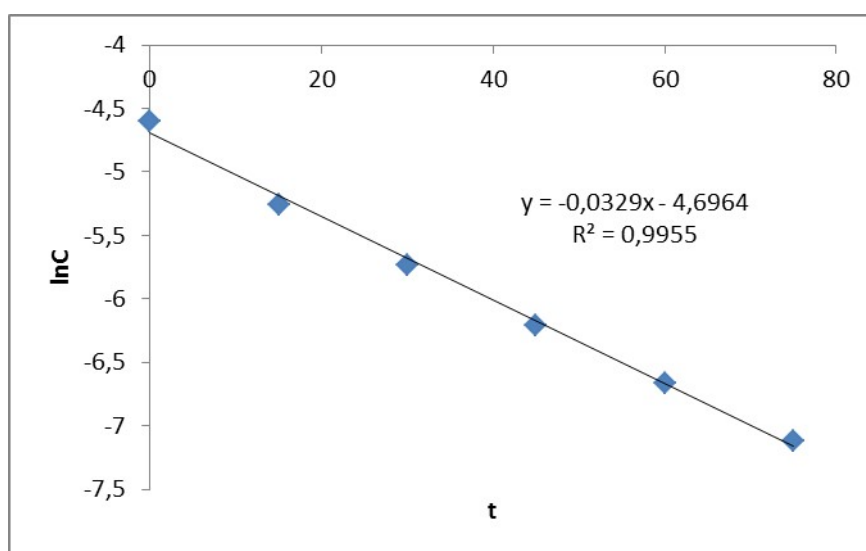

$$k_{\text{obs}} = 32.9 \pm 2.2 \times 10^{-3} \text{ s}^{-1}$$

### • *tert*-Buthanol

Conditions of experiment: 2Br-4F-Ph Ellman's imine **2a** (200  $\mu$ l, 0.04 M), 5 mol% Cu(PPh<sub>3</sub>)<sub>3</sub>F\*2EtOH [**Cu-1**] (200  $\mu$ l, 0.002 M), 10 eq. TABMA **1a** (400  $\mu$ l, 0.2 M), solvent – *t*BuOH, T = 25.0 °C.

| N <sup>o</sup> | A <sup>307</sup> | t, sec     | c, M   | lnC     |
|----------------|------------------|------------|--------|---------|
| 0              | 1,323            | 0          | 0,0096 | -4,6482 |
| 1              | 1,189            | 15         | 0,0086 | -4,7550 |
| 2              | 1,091            | 30         | 0,0079 | -4,8410 |
| 3              | 1,035            | 45         | 0,0075 | -4,8937 |
| 4              | 0,936            | 60         | 0,0068 | -4,9942 |
| 5              | 0,855            | 75         | 0,0062 | -5,0847 |
| 6              | 0,689            | <b>900</b> | 0,0050 | -5,3006 |



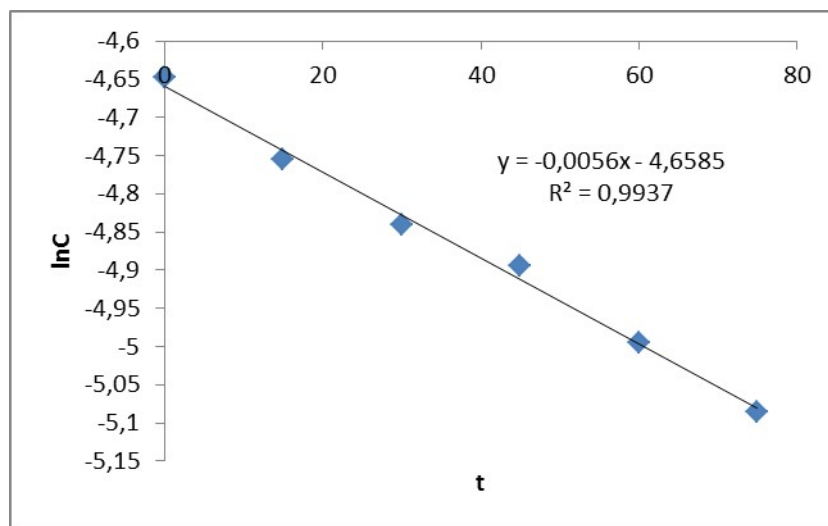

$$k_{\text{obs}} = 5.6 \pm 0.6 \times 10^{-3} \text{s}^{-1}$$

- **Ethanol**

Conditions of experiment: 2Br-4F-Ph Ellman's imine **2a** (200  $\mu\text{l}$ , 0.04 M), 5 mol%  $\text{Cu}(\text{PPh}_3)_3\text{F} \cdot 2\text{EtOH}$  [**Cu-1**] (200  $\mu\text{l}$ , 0.002 M), 10 eq. TABMA **1a** (400  $\mu\text{l}$ , 0.2M), solvent – EtOH, T = 25.0  $^\circ\text{C}$ .

| Nº | A <sup>307</sup> | t, sec     | c, M   | lnC     |
|----|------------------|------------|--------|---------|
| 0  | 1,331            | 0          | 0,0096 | -4,6422 |
| 1  | 1,055            | 15         | 0,0076 | -4,8745 |
| 2  | 0,826            | 30         | 0,0060 | -5,1192 |
| 3  | 0,667            | 45         | 0,0048 | -5,3331 |
| 4  | 0,556            | 60         | 0,0040 | -5,5151 |
| 5  | 0,463            | 75         | 0,0034 | -5,6981 |
| 6  | 0,095            | <b>900</b> | 0,0007 | -7,2820 |

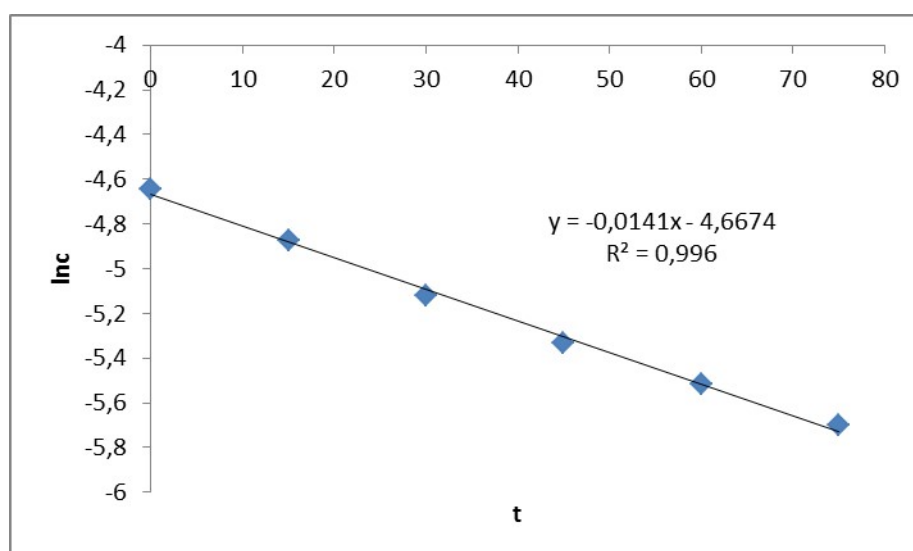

$$k_{\text{obs}} = 14.1 \pm 1.1 \times 10^{-3} \text{s}^{-1}$$

- **Methanol**

Conditions of experiment: 2Br-4F-Ph Ellman's imine **2a** (200  $\mu$ l, 0.04 M), 5 mol% Cu(PPh<sub>3</sub>)<sub>3</sub>F\*2EtOH [**Cu-1**] (200  $\mu$ l, 0.002 M), 10 eq. TABMA **1a** (400  $\mu$ l, 0.2M), solvent – MeOH, T = 25.0 °C.

| N <sup>o</sup> | A <sup>307</sup> | t, sec     | c, M   | lnC     |
|----------------|------------------|------------|--------|---------|
| 0              | 1,529            | 0          | 0,0111 | -4,5035 |
| 1              | 1,371            | 15         | 0,0099 | -4,6125 |
| 2              | 1,269            | 30         | 0,0092 | -4,6899 |
| 3              | 1,146            | 45         | 0,0083 | -4,7918 |
| 4              | 1,061            | 60         | 0,0077 | -4,8689 |
| 5              | 0,989            | 75         | 0,0072 | -4,9391 |
| 6              | 0,407            | <b>900</b> | 0,0029 | -5,8270 |

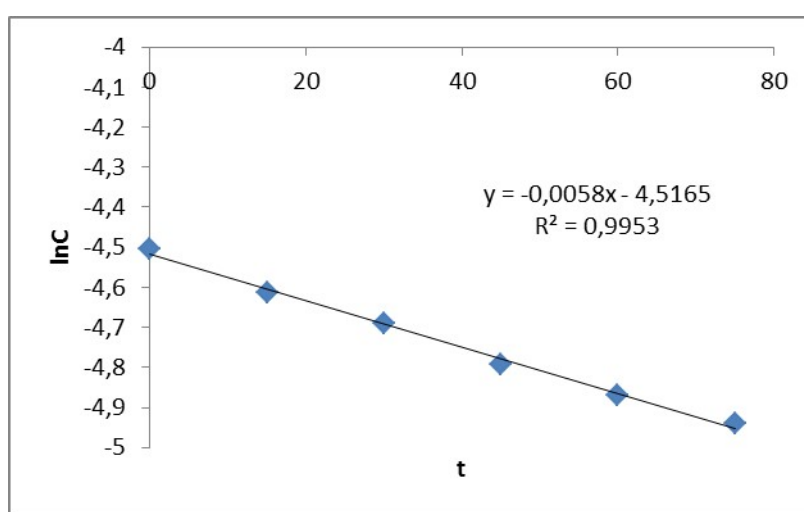

$$k_{\text{obs}} = 5.8 \pm 0.5 \times 10^{-3} \text{ s}^{-1}$$

### Determination of order allylation reaction of imine **2a** on catalyst [**Cu-1**]

- **0.5 mol% of [Cu-1]**

Conditions of experiment: 2Br-4F-Ph Ellman's imine **2a** (200  $\mu$ l, 0.04 M), 0.5 mol% Cu(PPh<sub>3</sub>)<sub>3</sub>F\*2EtOH [**Cu-1**] (200  $\mu$ l, 0.002 M), 10 eq. TABMA **1a** (400  $\mu$ l, 0.2 M), solvent – *i*PrOH, T = 25.0 °C.

| N <sup>o</sup> | A <sup>307</sup> | t, sec | c, M   | lnC     |
|----------------|------------------|--------|--------|---------|
| 0              | 1,385            | 0      | 0,0100 | -4,6024 |
| 1              | 1,344            | 15     | 0,0097 | -4,6324 |
| 2              | 1,294            | 30     | 0,0094 | -4,6703 |
| 3              | 1,251            | 45     | 0,0091 | -4,7041 |
| 4              | 1,207            | 60     | 0,0087 | -4,7399 |
| 5              | 1,144            | 75     | 0,0083 | -4,7936 |
| 6              | 1,102            | 90     | 0,0080 | -4,831  |
| 7              | 1,056            | 105    | 0,0076 | -4,8736 |

|   |       |     |        |         |
|---|-------|-----|--------|---------|
| 8 | 1,005 | 120 | 0,0073 | -4,9231 |
| 9 | 0,953 | 135 | 0,0069 | -4,9762 |

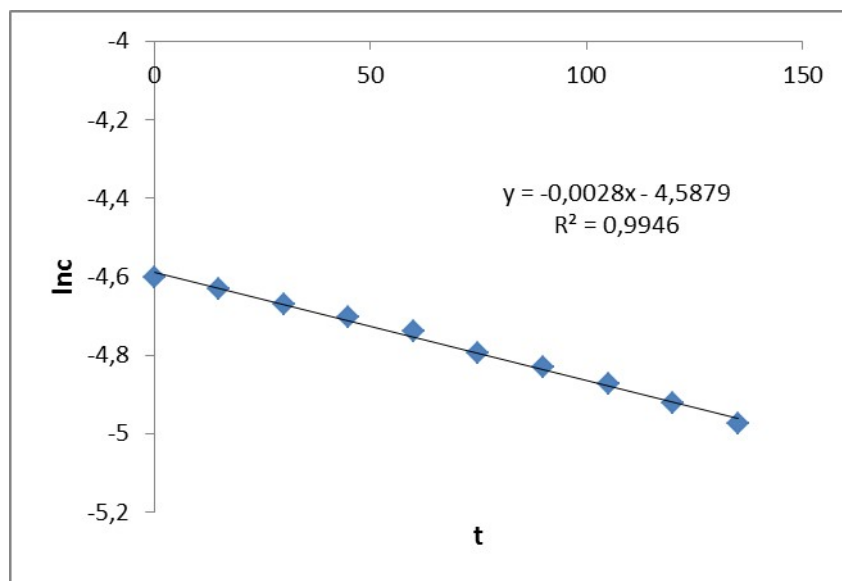

$$k_{\text{obs}} = 2.8 \pm 0.2 \times 10^{-3} \text{ s}^{-1}$$

- **1 mol% of [Cu-1]**

Conditions of experiment: 2Br-4F-Ph Ellman's imine **2a** (200  $\mu\text{l}$ , 0.04 M), 1 mol%  $\text{Cu}(\text{PPh}_3)_3\text{F} \cdot 2\text{EtOH}$  [**Cu-1**] (200  $\mu\text{l}$ , 0.002 M), 10 eq. TABMA **1a** (400  $\mu\text{l}$ , 0.2 M), solvent – *i*PrOH, T = 25.0  $^\circ\text{C}$ .

| N <sup>o</sup> | A <sup>307</sup> | t, sec | c, M   | lnC     |
|----------------|------------------|--------|--------|---------|
| 0              | 1,369            | 0      | 0,0099 | -4,6140 |
| 1              | 1,204            | 15     | 0,0087 | -4,7424 |
| 2              | 1,154            | 30     | 0,0084 | -4,7849 |
| 3              | 1,042            | 45     | 0,0075 | -4,8869 |
| 4              | 0,964            | 60     | 0,0070 | -4,9647 |
| 5              | 0,879            | 75     | 0,0064 | -5,0571 |
| 6              | 0,785            | 90     | 0,0057 | -5,1702 |
| 7              | 0,748            | 105    | 0,0054 | -5,2184 |
| 8              | 0,686            | 120    | 0,0050 | -5,3050 |
| 9              | 0,623            | 135    | 0,0045 | -5,4013 |

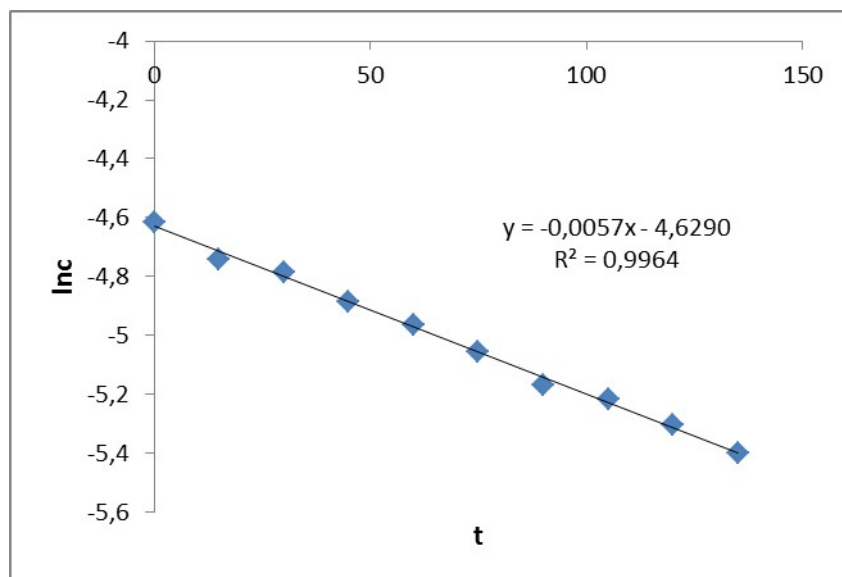

$$k_{\text{obs}} = 5.7 \pm 0.3 \times 10^{-3} \text{ s}^{-1}$$

- **2 mol% of [Cu-1]**

Conditions of experiment: 2Br-4F-Ph Ellman's imine **2a** (200  $\mu\text{l}$ , 0.04 M), 2 mol% Cu(PPh<sub>3</sub>)<sub>3</sub>F\*2EtOH [**Cu-1**] (200  $\mu\text{l}$ , 0.002 M), 10 eq. TABMA **1a** (400  $\mu\text{l}$ , 0.2 M), solvent – *i*PrOH, T = 25.0 °C.

| N <sub>0</sub> | A <sup>307</sup> | t, sec | c, M   | lnC     |
|----------------|------------------|--------|--------|---------|
| 0              | 1,345            | 0      | 0,0097 | -4,6317 |
| 1              | 1,075            | 15     | 0,0078 | -4,8558 |
| 2              | 0,903            | 30     | 0,0065 | -5,0301 |
| 3              | 0,741            | 45     | 0,0054 | -5,2278 |
| 4              | 0,634            | 60     | 0,0046 | -5,3838 |
| 5              | 0,538            | 75     | 0,0039 | -5,5480 |
| 6              | 0,465            | 90     | 0,0034 | -5,6938 |
| 7              | 0,378            | 105    | 0,0027 | -5,9009 |
| 8              | 0,287            | 120    | 0,0021 | -6,1764 |
| 9              | 0,234            | 135    | 0,0017 | -6,3805 |

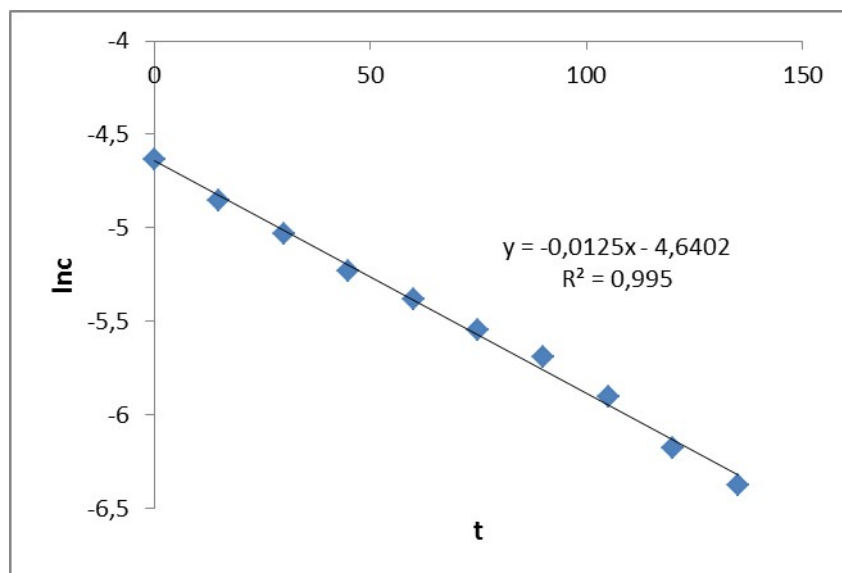

$$k_{\text{obs}} = 12.5 \pm 0.7 \times 10^{-3} \text{s}^{-1}$$

- **3 mol% of [Cu-1]**

Conditions of experiment: 2Br-4F-Ph Ellman's imine **2a** (200  $\mu\text{l}$ , 0.04 M), 3 mol% Cu(PPh<sub>3</sub>)<sub>3</sub>F\*2EtOH [**Cu-1**] (200  $\mu\text{l}$ , 0.002 M), 10 eq. TABMA **1a** (400  $\mu\text{l}$ , 0.2 M), solvent – *i*PrOH, T = 25.0 °C.

| Nº | A <sup>307</sup> | t, sec | c, M   | lnC     |
|----|------------------|--------|--------|---------|
| 0  | 1,225            | 0      | 0,0089 | -4,7251 |
| 1  | 0,932            | 15     | 0,0067 | -4,9985 |
| 2  | 0,721            | 30     | 0,0052 | -5,2552 |
| 3  | 0,487            | 45     | 0,0035 | -5,6476 |
| 4  | 0,363            | 60     | 0,0026 | -5,9414 |
| 5  | 0,287            | 75     | 0,0021 | -6,1764 |
| 6  | 0,237            | 90     | 0,0017 | -6,3678 |
| 7  | 0,154            | 105    | 0,0011 | -6,7989 |
| 8  | 0,123            | 120    | 0,0009 | -7,0237 |
| 9  | 0,097            | 135    | 0,0007 | -7,2611 |

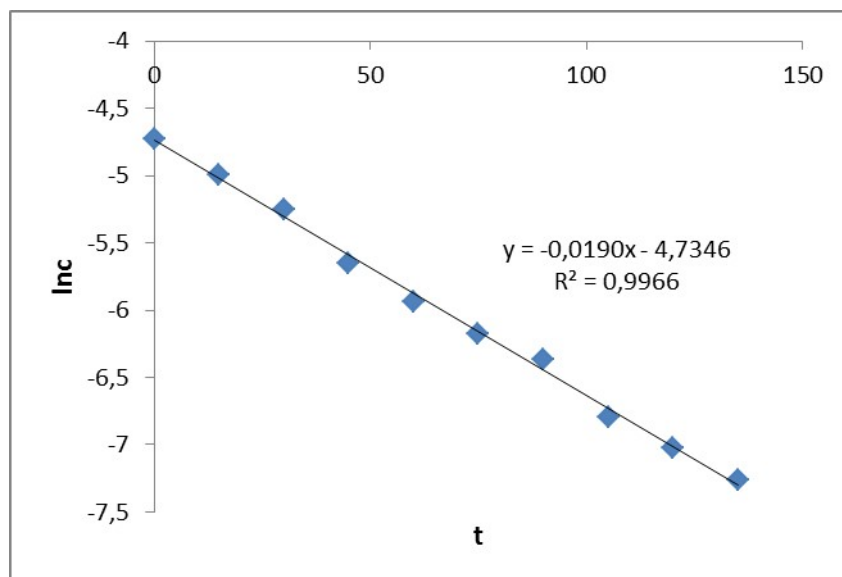

$$k_{\text{obs}} = 19.0 \pm 0.9 \times 10^{-3} \text{s}^{-1}$$

- 4 mol% of [Cu-1]

Conditions of experiment: 2Br-4F-Ph Ellman's imine **2a** (200  $\mu\text{l}$ , 0.04 M), 4 mol% Cu(PPh<sub>3</sub>)<sub>3</sub>F\*2EtOH [Cu-1] (200  $\mu\text{l}$ , 0.002 M), 10 eq. TABMA **1a** (400  $\mu\text{l}$ , 0.2 M), solvent – *i*PrOH, T = 25.0 °C.

| N <sub>0</sub> | A <sup>307</sup> | t, sec | c, M   | lnC     |
|----------------|------------------|--------|--------|---------|
| 0              | 1,324            | 0      | 0,0096 | -4,6474 |
| 1              | 0,931            | 15     | 0,0067 | -4,9996 |
| 2              | 0,597            | 30     | 0,0043 | -5,4439 |
| 3              | 0,499            | 45     | 0,0036 | -5,6232 |
| 4              | 0,332            | 60     | 0,0024 | -6,0307 |
| 5              | 0,235            | 75     | 0,0017 | -6,3763 |
| 6              | 0,157            | 90     | 0,0011 | -6,7796 |
| 7              | 0,102            | 105    | 0,0007 | -7,2109 |
| 8              | 0,063            | 120    | 0,0005 | -7,6927 |
| 9              | 0,042            | 135    | 0,0003 | -8,0982 |

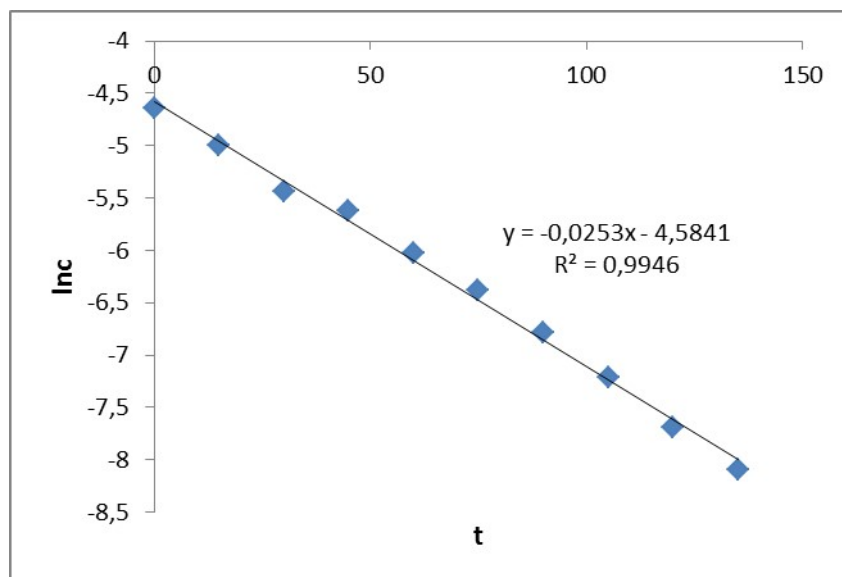

$$k_{\text{obs}} = 25.3 \pm 1.5 \times 10^{-3} \text{s}^{-1}$$

- **Determination of [Cu-1] order in the allylation reaction**

| C, M    | lnC      | k, s <sup>-1</sup> | lnk      |
|---------|----------|--------------------|----------|
| 0,0005  | -7,6009  | 0,0329             | -3,41428 |
| 0,0004  | -7,82405 | 0,0253             | -3,67695 |
| 0,0003  | -8,11173 | 0,0190             | -3,96332 |
| 0,0002  | -8,51719 | 0,0125             | -4,38203 |
| 0,0001  | -9,21034 | 0,0057             | -5,16729 |
| 0,00005 | -9,90349 | 0,0028             | -5,87814 |

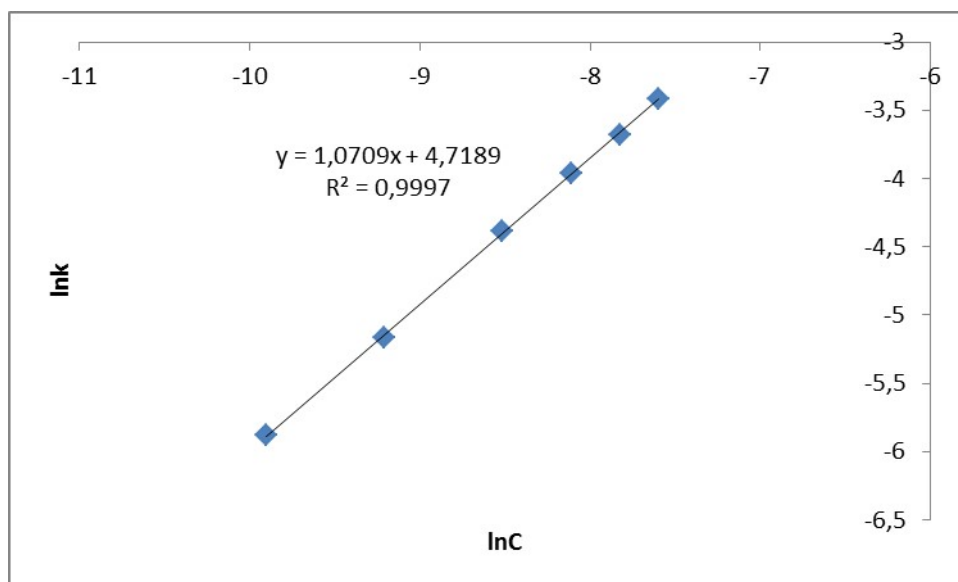

Reaction has the 1st order on the [Cu-1] catalyst.

## Rate constants of allylation of imine **2a** with different triallylborane-amine adducts **1b-1d** in isopropyl alcohol (Scheme 6 of the main text)

- **Triallylborane-ammonia adduct (1b)**

Conditions of experiment: 2Br-4F-Ph Ellman's imine **2a** (200  $\mu$ l, 0.04 M), 5 mol% Cu(PPh<sub>3</sub>)<sub>3</sub>F\*2EtOH [**Cu-1**] (200  $\mu$ l, 0.002 M), 10 eq. TABA **1b** (400  $\mu$ l, 0.2 M), solvent – *i*PrOH, T = 25.0 °C.

| N <sup>o</sup> | A <sup>307</sup> | t, sec | c, M   | lnC     |
|----------------|------------------|--------|--------|---------|
| 0              | 1,365            | 0      | 0,0099 | -4,6169 |
| 1              | 0,794            | 10     | 0,0057 | -5,1588 |
| 2              | 0,485            | 20     | 0,0035 | -5,6517 |
| 3              | 0,317            | 30     | 0,0023 | -6,0769 |
| 4              | 0,219            | 40     | 0,0016 | -6,4468 |
| 5              | 0,134            | 50     | 0,0010 | -6,9380 |

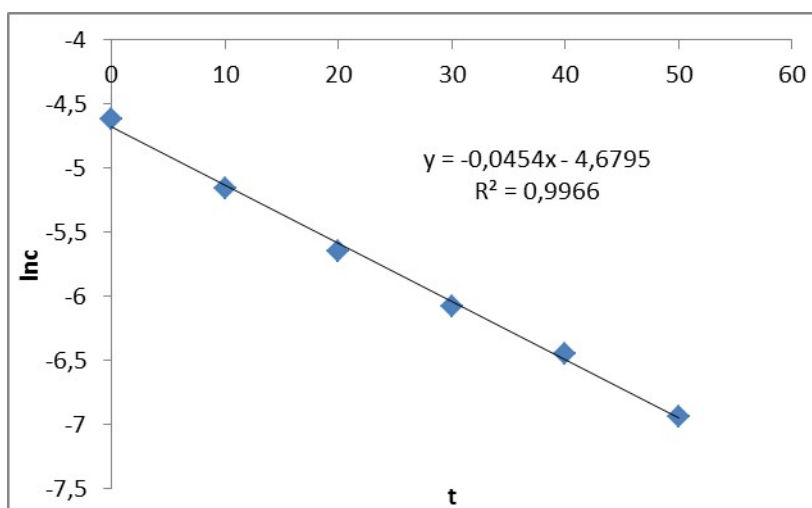

$$k_{\text{obs}} = 45.4 \pm 3.4 \times 10^{-3} \text{ s}^{-1}$$

- **Triallylborane-dimethylamine adduct (1c)**

Conditions of experiment: 2Br-4F-Ph Ellman's imine **2a** (200  $\mu$ l, 0.04 M), 0.5 mol% Cu(PPh<sub>3</sub>)<sub>3</sub>F\*2EtOH [**Cu-1**] (200  $\mu$ l, 0.002 M), 10 eq. TABDMA **1c** (400  $\mu$ l, 0.2 M), solvent – *i*PrOH, T = 25.0 °C.

| N <sup>o</sup> | A <sup>307</sup> | t, sec | c, M   | lnC     |
|----------------|------------------|--------|--------|---------|
| 0              | 1,364            | 0      | 0,0099 | -4,6177 |
| 1              | 1,005            | 15     | 0,0073 | -4,9231 |
| 2              | 0,800            | 30     | 0,0058 | -5,1512 |
| 3              | 0,568            | 45     | 0,0041 | -5,4937 |
| 4              | 0,473            | 60     | 0,0034 | -5,6767 |
| 5              | 0,293            | 75     | 0,0021 | -6,1557 |
| 6              | 0,206            | 90     | 0,0015 | -6,5080 |
| 7              | 0,166            | 105    | 0,0012 | -6,7239 |
| 8              | 0,116            | 120    | 0,0008 | -7,0822 |



|    |       |     |        |         |
|----|-------|-----|--------|---------|
| 9  | 0,094 | 135 | 0,0007 | -7,2925 |
| 10 | 0,074 | 150 | 0,0005 | -7,5318 |

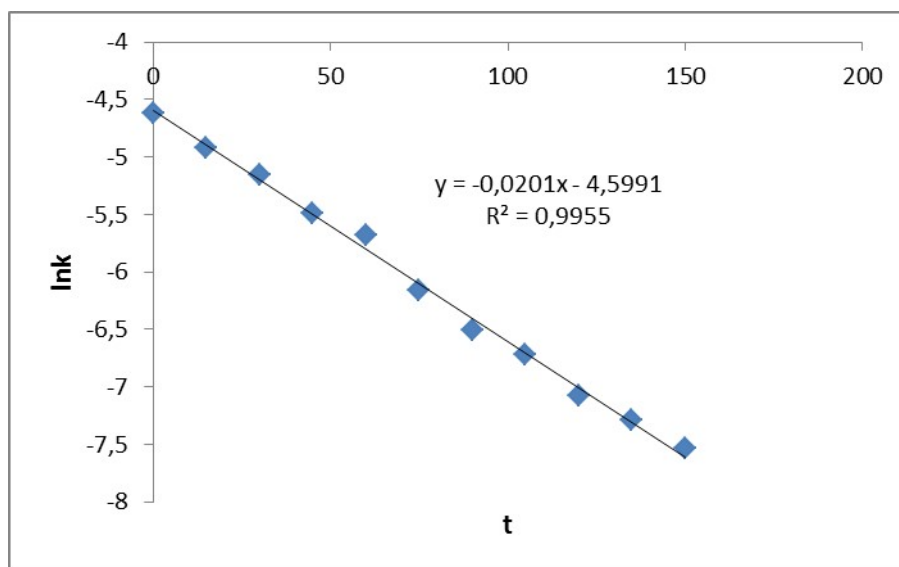

$$k_{\text{obs}} = 20.1 \pm 1.0 \times 10^{-3} \text{s}^{-1} \text{ (at 0.5 mol\% of [Cu-1])}$$

$$k_{\text{calculated}} = 201 \pm 10 \times 10^{-3} \text{s}^{-1} \text{ (at 5 mol\% of [Cu-1])}$$

- **Triallylborane-1,4-diazabicyclo[2.2.2]octane adduct (1c)**

Conditions of experiment: 2Br-4F-Ph Ellman's imine **2a** (200  $\mu\text{l}$ , 0.04 M), 0.05 mol% Cu(PPh<sub>3</sub>)<sub>3</sub>F\*2EtOH [Cu-1] (200  $\mu\text{l}$ , 0.002 M), 10 eq. TABDABCO **1d** (400  $\mu\text{l}$ , 0.2M), solvent – *i*PrOH, T = 25.0 °C.

| Nº | A <sup>307</sup> | t, sec | c, M   | lnC     |
|----|------------------|--------|--------|---------|
| 0  | 1,300            | 0      | 0,0094 | -4,6657 |
| 1  | 1,091            | 15     | 0,0079 | -4,8410 |
| 2  | 1,004            | 30     | 0,0073 | -4,9241 |
| 3  | 0,885            | 45     | 0,0064 | -5,0503 |
| 4  | 0,771            | 60     | 0,0056 | -5,1882 |
| 5  | 0,737            | 75     | 0,0053 | -5,2333 |
| 6  | 0,648            | 90     | 0,0047 | -5,3619 |
| 7  | 0,597            | 105    | 0,0043 | -5,4439 |
| 8  | 0,489            | 120    | 0,0035 | -5,6435 |
| 9  | 0,442            | 135    | 0,0032 | -5,7445 |
| 10 | 0,417            | 150    | 0,0030 | -5,8028 |

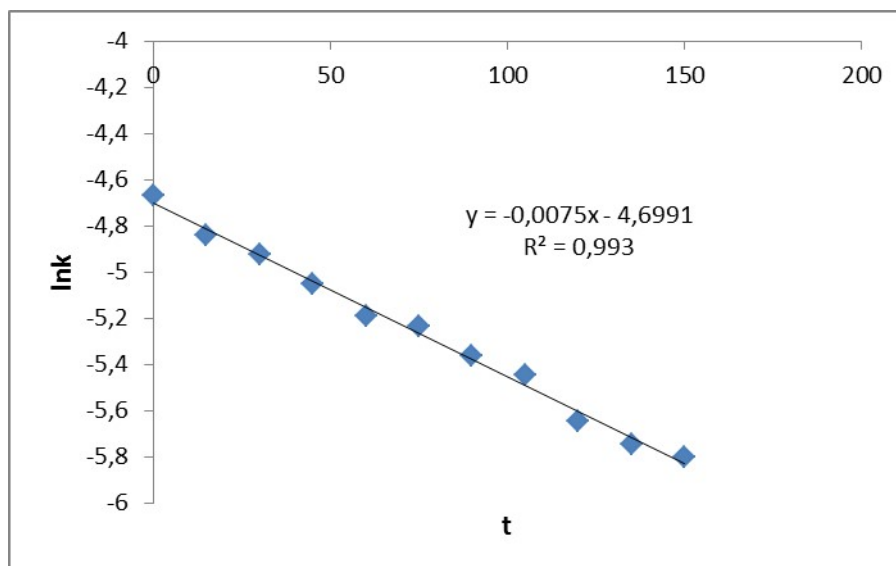

$$k_{\text{obs}} = 7.5 \pm 0.5 \times 10^{-3} \text{s}^{-1} \text{ (at 0.05 mol\% of [Cu-1])}$$

$$k_{\text{calculated}} = 750 \pm 50 \times 10^{-3} \text{s}^{-1} \text{ (at 5 mol\% of [Cu-1])}$$

### The dependence of the allylation reaction rate with triallylborane-methylamine adduct **1a** on the temperature

- **T = 10.0 °C (283.1 °K)**

Conditions of experiment: 2Br-4F-Ph Ellman's imine **2a** (200 µl, 0.04 M), 5 mol% Cu(PPh<sub>3</sub>)<sub>3</sub>F\*2EtOH [**Cu-1**] (200 µl, 0.002 M), 10 eq. TABMA **1a** (400 µl, 0.2M), solvent – *i*PrOH, T = 10.0 °C.

| № | A <sup>307</sup> | t, sec | c, M   | lnC     |
|---|------------------|--------|--------|---------|
| 0 | 1,314            | 0      | 0,0095 | -4,6550 |
| 1 | 1,215            | 60     | 0,0088 | -4,7333 |
| 2 | 1,158            | 120    | 0,0084 | -4,7814 |
| 3 | 1,069            | 200    | 0,0077 | -4,8614 |
| 4 | 1,009            | 240    | 0,0073 | -4,9191 |
| 5 | 0,954            | 300    | 0,0069 | -4,9752 |
| 6 | 0,911            | 360    | 0,0066 | -5,0213 |

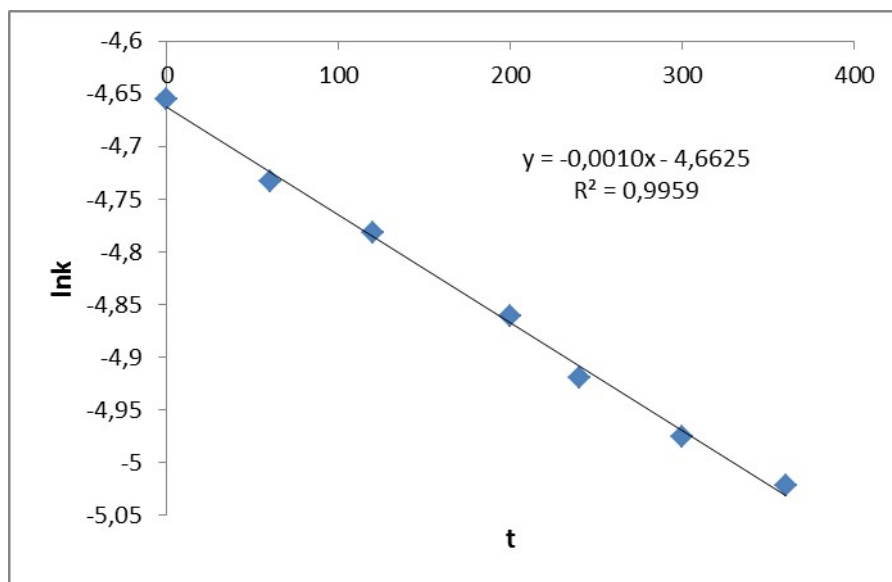

$$k_{\text{obs}} = 1.0 \pm 0.1 \times 10^{-3} \text{ s}^{-1}$$

- **T = 15.0 °C (288.1 °K)**

Conditions of experiment: 2Br-4F-Ph Ellman's imine **2a** (200  $\mu\text{l}$ , 0.04 M), 5 mol% Cu(PPh<sub>3</sub>)<sub>3</sub>F\*2EtOH [**Cu-1**] (200  $\mu\text{l}$ , 0.002 M), 10 eq. TABMA **1a** (400  $\mu\text{l}$ , 0.2M), solvent – *i*PrOH, T = 15.0 °C.

| Nº | A <sup>307</sup> | t, sec | c, M   | lnC     |
|----|------------------|--------|--------|---------|
| 0  | 1,254            | 0      | 0,0091 | -4,7017 |
| 1  | 1,072            | 30     | 0,0078 | -4,8586 |
| 2  | 0,969            | 60     | 0,0070 | -4,9596 |
| 3  | 0,876            | 90     | 0,0063 | -5,0605 |
| 4  | 0,809            | 120    | 0,0059 | -5,1400 |
| 5  | 0,745            | 150    | 0,0054 | -5,2225 |
| 6  | 0,685            | 180    | 0,0050 | -5,3064 |
| 7  | 0,610            | 210    | 0,0044 | -5,4224 |
| 8  | 0,590            | 240    | 0,0043 | -5,4557 |

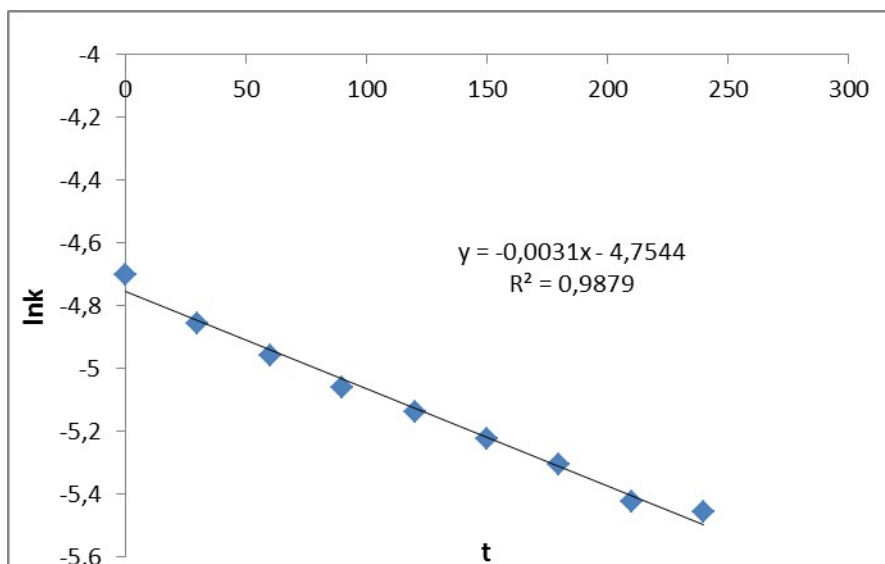

$$k_{\text{obs}} = 3.1 \pm 0.3 \times 10^{-3} \text{ s}^{-1}$$

- **T = 20.0 °C (293.1 °K)**

Conditions of experiment: 2Br-4F-Ph Ellman's imine **2a** (200  $\mu\text{l}$ , 0.04 M), 5 mol% Cu(PPh<sub>3</sub>)<sub>3</sub>F\*2EtOH [**Cu-1**] (200  $\mu\text{l}$ , 0.002 M), 10 eq. TABMA **1a** (400  $\mu\text{l}$ , 0.2M), solvent – *i*PrOH, T = 20.0 °C.

| N <sup>o</sup> | A <sup>307</sup> | t, sec | c, M   | lnC     |
|----------------|------------------|--------|--------|---------|
| 0              | 1,415            | 0      | 0,0102 | -4,5810 |
| 1              | 0,975            | 15     | 0,0071 | -4,9534 |
| 2              | 0,803            | 30     | 0,0058 | -5,1475 |
| 3              | 0,641            | 45     | 0,0046 | -5,3728 |
| 4              | 0,535            | 60     | 0,0039 | -5,5536 |
| 5              | 0,436            | 75     | 0,0032 | -5,7582 |
| 6              | 0,350            | 90     | 0,0025 | -5,9779 |
| 7              | 0,278            | 105    | 0,0020 | -6,2082 |
| 8              | 0,232            | 120    | 0,0017 | -6,3891 |
| 9              | 0,206            | 135    | 0,0015 | -6,5080 |
| 10             | 0,177            | 150    | 0,0013 | -6,6597 |

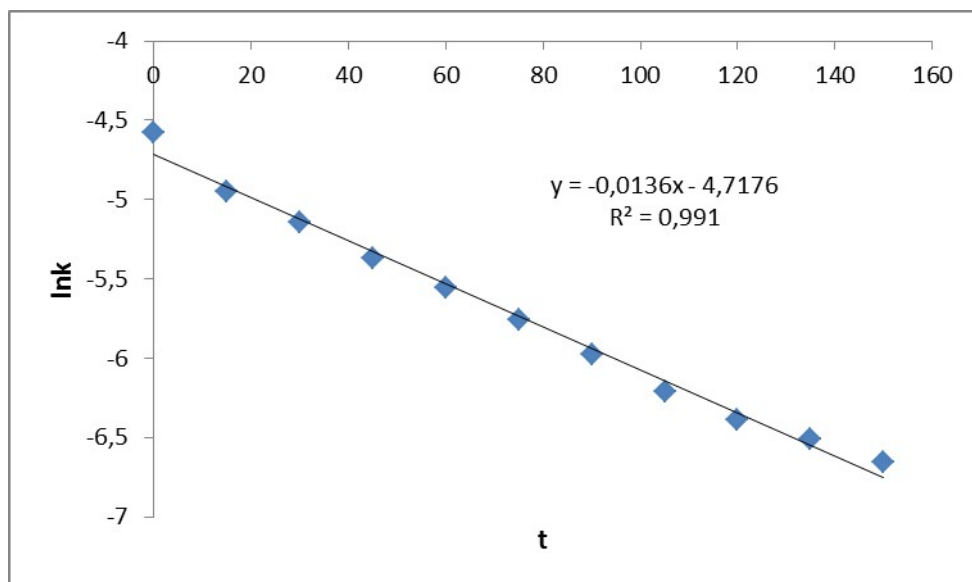

$$k_{\text{obs}} = 13.6 \pm 1.0 \times 10^{-3} \text{s}^{-1}$$

- **T = 30.0 °C (303.1 °K)**

Conditions of experiment: 2Br-4F-Ph Ellman's imine **2a** (200  $\mu\text{l}$ , 0.04 M), 5 mol% Cu(PPh<sub>3</sub>)<sub>3</sub>F\*2EtOH [**Cu-1**] (200  $\mu\text{l}$ , 0.002 M), 10 eq. TABMA **1a** (400  $\mu\text{l}$ , 0.2M), solvent – *i*PrOH, T = 30.0 °C.

| Nº | A <sup>307</sup> | t, sec | c, M   | lnC     |
|----|------------------|--------|--------|---------|
| 0  | 1,334            | 0      | 0,0097 | -4,6399 |
| 1  | 0,584            | 10     | 0,0042 | -5,4659 |
| 2  | 0,354            | 20     | 0,0026 | -5,9665 |
| 3  | 0,245            | 30     | 0,0018 | -6,3346 |
| 4  | 0,185            | 40     | 0,0013 | -6,6155 |
| 5  | 0,112            | 50     | 0,0008 | -7,1173 |
| 6  | 0,089            | 60     | 0,0006 | -7,3472 |
| 7  | 0,042            | 70     | 0,0003 | -8,0982 |
| 8  | 0,028            | 80     | 0,0002 | -8,5036 |

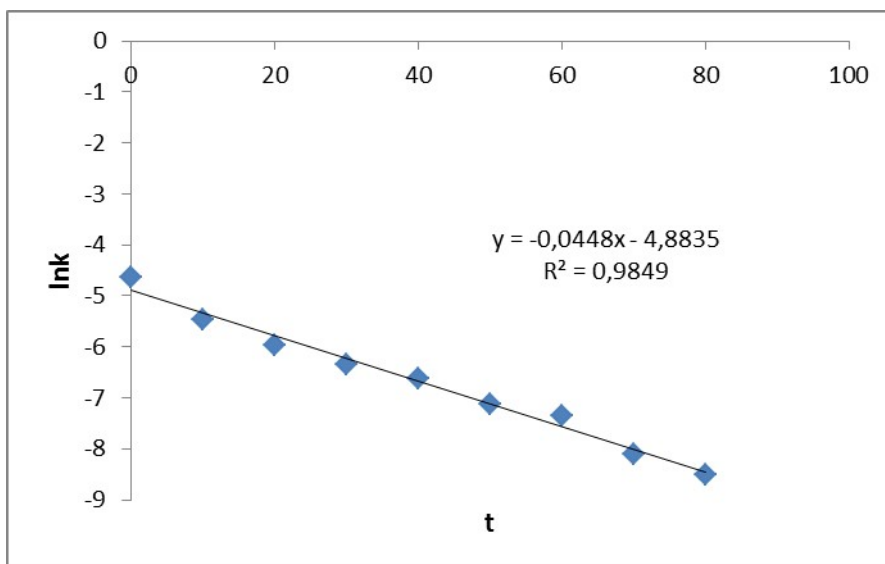

$$k_{\text{obs}} = 44.8 \pm 4.8 \times 10^{-3} \text{s}^{-1}$$

- **T = 35.0 °C (308.1 °K)**

Conditions of experiment: 2Br-4F-Ph Ellman's imine **2a** (200  $\mu\text{l}$ , 0.04 M), 5 mol%  $\text{Cu}(\text{PPh}_3)_3\text{F} \cdot 2\text{EtOH}$  [**Cu-1**] (200  $\mu\text{l}$ , 0.002 M), 10 eq. TABMA **1a** (400  $\mu\text{l}$ , 0.2M), solvent – *i*PrOH, T = 35.0 °C.

| N <sup>o</sup> | A <sup>307</sup> | t, sec | c, M   | lnC     |
|----------------|------------------|--------|--------|---------|
| 0              | 1,394            | 0      | 0,0101 | -4,5959 |
| 1              | 0,776            | 10     | 0,0056 | -5,1817 |
| 2              | 0,333            | 20     | 0,0024 | -6,0277 |
| 3              | 0,188            | 30     | 0,0014 | -6,5994 |
| 4              | 0,127            | 40     | 0,0009 | -6,9917 |
| 5              | 0,047            | 50     | 0,0003 | -7,9857 |

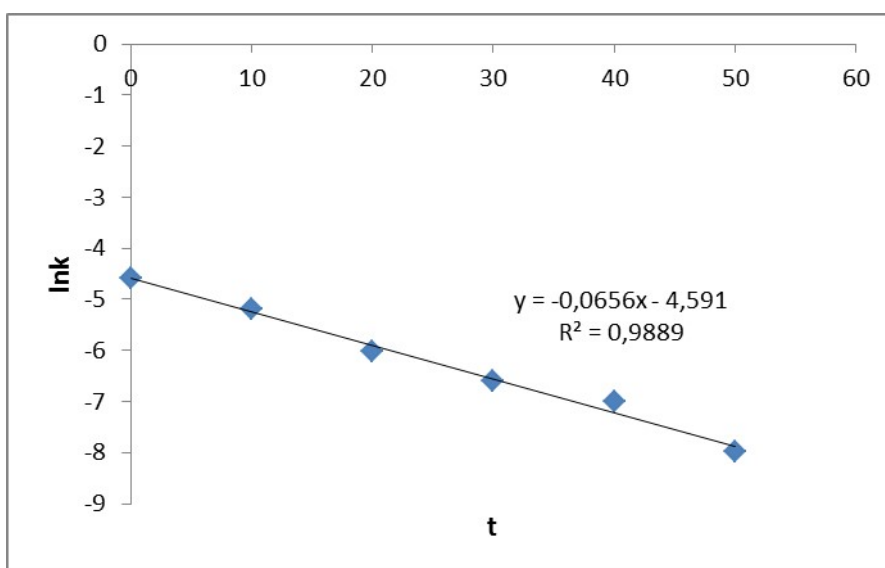

$$k_{\text{obs}} = 65.6 \pm 8.9 \times 10^{-3} \text{s}^{-1}$$

- Graph of dependence logarithmic allylation reaction rate versus inverse of the temperature

| T, °C | T, °K | k, s <sup>-1</sup> | 1/T     | lnk     |
|-------|-------|--------------------|---------|---------|
| 10.0  | 283,1 | 0,0010             | 0,00353 | -6,9078 |
| 15.0  | 288,1 | 0,0031             | 0,00347 | -5,7764 |
| 20.0  | 293,1 | 0,0136             | 0,00341 | -4,2977 |
| 25.0  | 298,1 | 0,0329             | 0,00335 | -3,4143 |
| 30.0  | 303,1 | 0,0448             | 0,00330 | -3,1055 |
| 35.0  | 308,1 | 0,0656             | 0,00325 | -2,7242 |

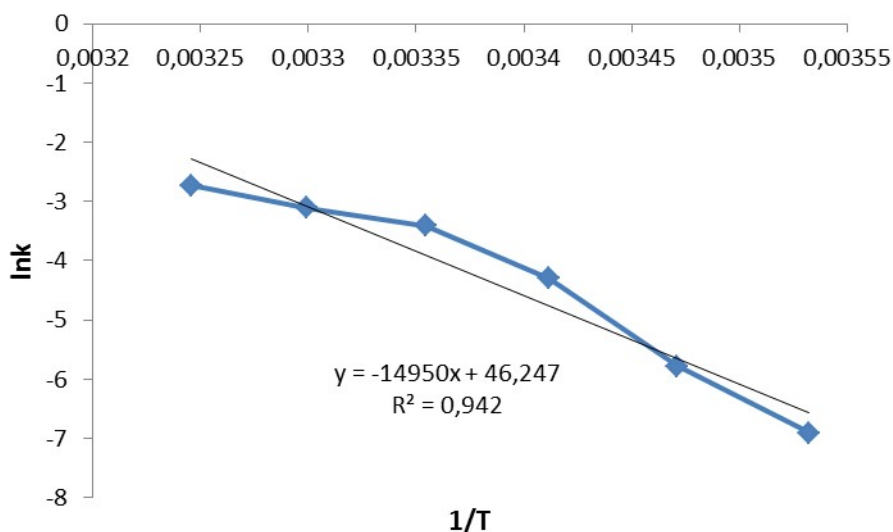

$$E_{a(\text{obs.})} = 124 \pm 40 \text{ kJ/mol}$$

**Rate constants of allylation of imine **2a** with intermediate (diallyl)isopropoxyborinane-methylamine adduct **1f** and allyl(diisopropoxy)borane **5** in isopropyl alcohol (Scheme 7 of the main text)**

- **Allyl(diisopropoxy)borane (5)**

Conditions of experiment: 2Br-4F-Ph Ellman's imine **2a** (200  $\mu$ l, 0.04 M), 5 mol% Cu(PPh<sub>3</sub>)<sub>3</sub>F\*2EtOH [**Cu-1**] (200  $\mu$ l), 10 eq. AllB(O*i*Pr)<sub>2</sub> **5** (400  $\mu$ l, 0.2 M), solvent – *i*PrOH, T = 25.0 °C.

| N <sup>o</sup> | A <sup>307</sup> | t, sec | c, M   | lnC     |
|----------------|------------------|--------|--------|---------|
| 0              | 1,301            | 0      | 0,0094 | -4,665  |
| 1              | 0,991            | 30     | 0,0072 | -4,9371 |
| 2              | 0,723            | 60     | 0,0052 | -5,2524 |
| 3              | 0,511            | 90     | 0,0037 | -5,5995 |
| 4              | 0,376            | 120    | 0,0027 | -5,9063 |

|   |       |     |        |         |
|---|-------|-----|--------|---------|
| 5 | 0,242 | 150 | 0,0018 | -6,3469 |
| 6 | 0,179 | 180 | 0,0013 | -6,6485 |
| 7 | 0,108 | 210 | 0,0008 | -7,1537 |
| 8 | 0,086 | 240 | 0,0006 | -7,3815 |
| 9 | 0,070 | 270 | 0,0005 | -7,5873 |

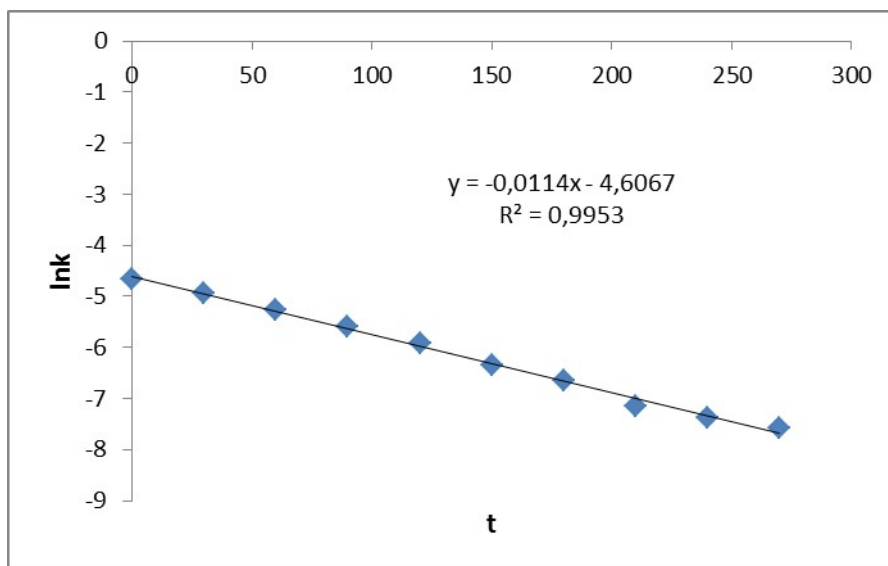

$$k_{\text{obs}} = 11.4 \pm 0.6 \times 10^{-3} \text{s}^{-1}$$

- **Allyl(diisopropoxy)borane (5) with addition of MeNH<sub>2</sub>**

Conditions of experiment: 2Br-4F-Ph Ellman's imine **2a** (200 μl, 0.04 M), 5 mol% Cu(PPh<sub>3</sub>)<sub>3</sub>F\*2EtOH [**Cu-1**] (200 μl), 10 eq. AllB(O*i*Pr)<sub>2</sub> **5** + 10 eq. MeNH<sub>2</sub> (400 μl, 0.2 M), solvent – *i*PrOH, T = 25.0 °C. MeNH<sub>2</sub> was added as 6 M solution in *i*PrOH.

| N <sup>o</sup> | A <sup>307</sup> | t, sec | c, M   | lnC     |
|----------------|------------------|--------|--------|---------|
| 0              | 1,310            | 0      | 0,0095 | -4,6581 |
| 1              | 1,201            | 30     | 0,0087 | -4,7449 |
| 2              | 1,073            | 60     | 0,0078 | -4,8576 |
| 3              | 0,999            | 90     | 0,0072 | -4,9291 |
| 4              | 0,925            | 120    | 0,0067 | -5,006  |
| 5              | 0,843            | 150    | 0,0061 | -5,0989 |
| 6              | 0,795            | 180    | 0,0058 | -5,1575 |
| 7              | 0,752            | 210    | 0,0054 | -5,2131 |
| 8              | 0,713            | 240    | 0,0052 | -5,2664 |



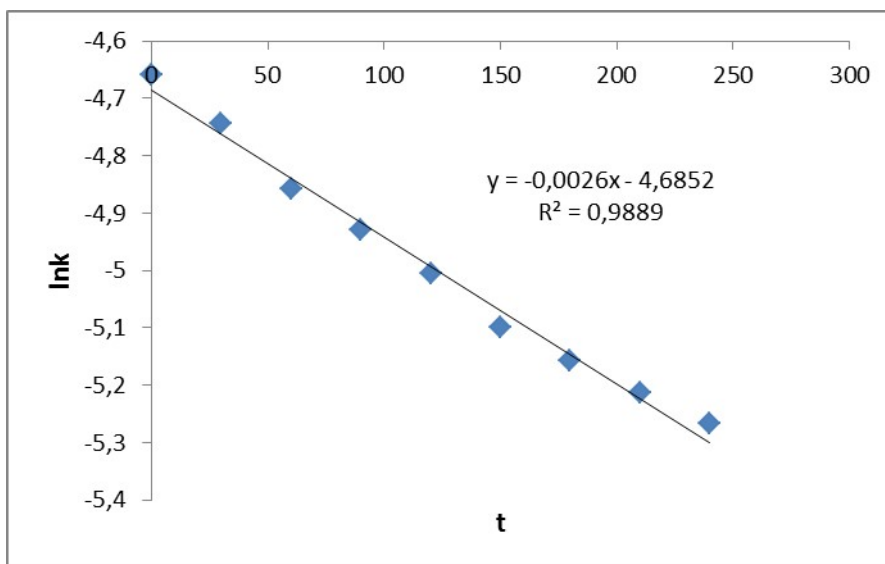

$$k_{\text{obs}} = 2.6 \pm 0.2 \times 10^{-3} \text{s}^{-1}$$

- **Allyl(diisopropoxy)borane (5) with addition of Et<sub>3</sub>N**

Conditions of experiment: 2Br-4F-Ph Ellman's imine **2a** (200  $\mu$ l, 0.04 M), 5 mol% Cu(PPh<sub>3</sub>)<sub>3</sub>F\*2EtOH [**Cu-1**] (200  $\mu$ l), 10 eq. AllB(O*i*Pr)<sub>2</sub> **5** + 10 eq. Et<sub>3</sub>N (400  $\mu$ l, 0.2 M), solvent – *i*PrOH, T = 25.0 °C.

| N <sup>o</sup> | A <sup>307</sup> | t, sec | c, M   | lnC     |
|----------------|------------------|--------|--------|---------|
| 0              | 1,350            | 0      | 0,0098 | -4,6280 |
| 1              | 1,195            | 15     | 0,0087 | -4,7499 |
| 2              | 1,080            | 30     | 0,0078 | -4,8511 |
| 3              | 0,868            | 45     | 0,0063 | -5,0696 |
| 4              | 0,711            | 60     | 0,0051 | -5,2692 |
| 5              | 0,597            | 75     | 0,0043 | -5,4439 |
| 6              | 0,505            | 90     | 0,0037 | -5,6113 |
| 7              | 0,456            | 105    | 0,0033 | -5,7133 |
| 8              | 0,367            | 120    | 0,0027 | -5,9305 |

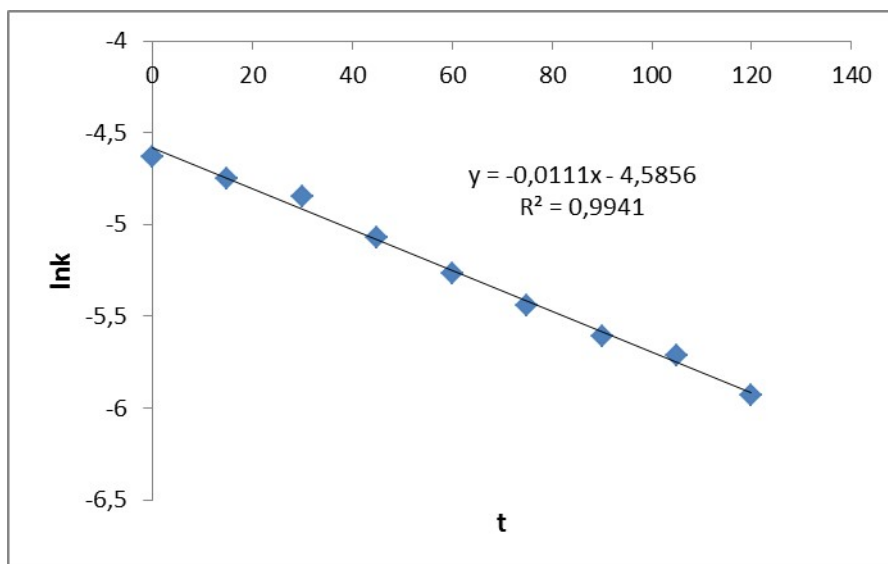

$$k_{\text{obs}} = 11.1 \pm 0.7 \times 10^{-3} \text{s}^{-1}$$

- **Allyl(diisopropoxy)borane (5) with addition of DABCO**

Conditions of experiment: 2Br-4F-Ph Ellman's imine **2a** (200  $\mu\text{l}$ , 0.04 M), 5 mol%  $\text{Cu}(\text{PPh}_3)_3\text{F} \cdot 2\text{EtOH}$  [**Cu-1**] (200  $\mu\text{l}$ ), 10 eq.  $\text{AllB}(\text{O}i\text{Pr})_2$  **5** + 10 eq. DABCO (400  $\mu\text{l}$ , 0.2 M), solvent – *i*PrOH, T = 25.0  $^\circ\text{C}$ .

| N <sup>o</sup> | A <sup>307</sup> | t, sec | c, M   | lnC     |
|----------------|------------------|--------|--------|---------|
| 0              | 1,350            | 0      | 0,0098 | -4,6280 |
| 1              | 1,110            | 15     | 0,0080 | -4,8237 |
| 2              | 0,871            | 30     | 0,0063 | -5,0662 |
| 3              | 0,666            | 45     | 0,0048 | -5,3346 |
| 4              | 0,529            | 60     | 0,0038 | -5,5649 |
| 5              | 0,389            | 75     | 0,0028 | -5,8723 |
| 6              | 0,305            | 90     | 0,0022 | -6,1155 |
| 7              | 0,228            | 105    | 0,0017 | -6,4065 |
| 8              | 0,181            | 120    | 0,0013 | -6,6373 |
| 9              | 0,160            | 135    | 0,0012 | -6,7607 |

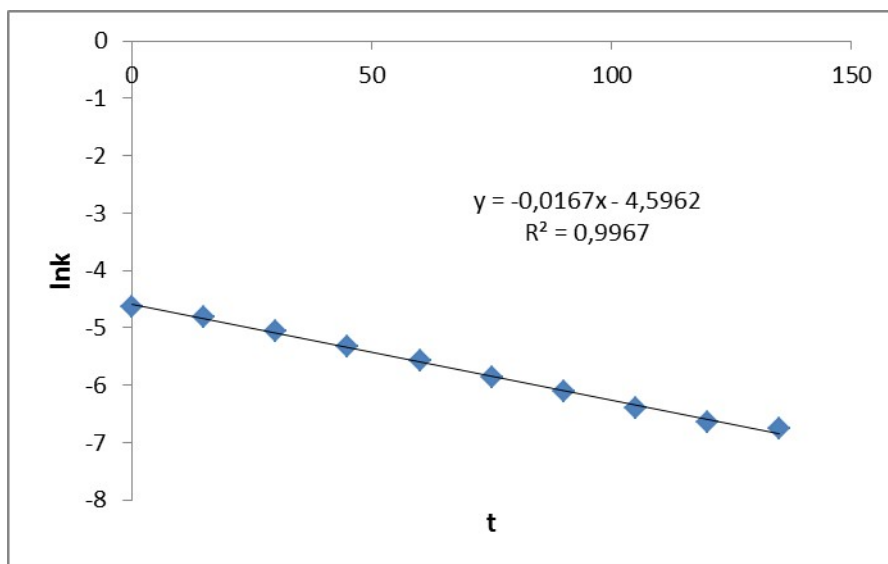

$$k_{\text{obs}} = 16.7 \pm 0.8 \times 10^{-3} \text{s}^{-1}$$

- **Allylboronic acid pinacol ester**

Conditions of experiment: 2Br-4F-Ph Ellman's imine **2a** (200  $\mu\text{l}$ , 0.04 M), 5 mol%  $\text{Cu}(\text{PPh}_3)_3\text{F} \cdot 2\text{EtOH}$  [**Cu-1**] (200  $\mu\text{l}$ ), 10 eq. AllBPIn (400  $\mu\text{l}$ , 0.2 M), solvent – *i*PrOH, T = 25.0  $^\circ\text{C}$ .

| N <sup>o</sup> | A <sup>307</sup> | t, sec | c, M   | lnC     |
|----------------|------------------|--------|--------|---------|
| 0              | 1.417            | 0      | 0.0103 | -4.5795 |
| 1              | 1.377            | 15     | 0.0100 | -4.6082 |
| 2              | 1.307            | 30     | 0.0095 | -4.6604 |
| 3              | 1.253            | 45     | 0.0091 | -4.7025 |
| 4              | 1.214            | 60     | 0.0088 | -4.7342 |
| 5              | 1.161            | 75     | 0.0084 | -4.7788 |
| 6              | 1.114            | 90     | 0.0081 | -4.8201 |
| 7              | 1.069            | 105    | 0.0077 | -4.8614 |
| 8              | 1.014            | 120    | 0.0073 | -4.9142 |

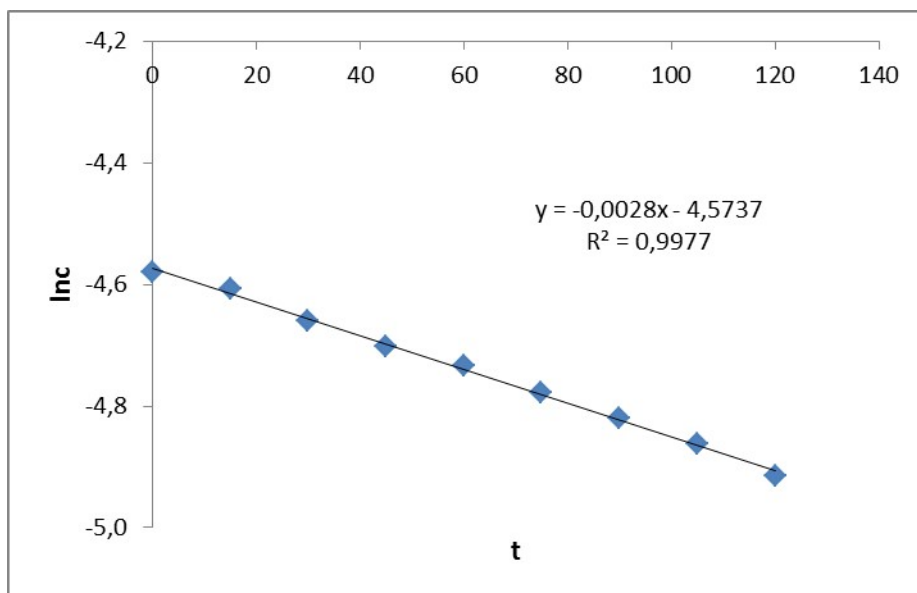

$$k_{\text{obs}} = 2.8 \pm 0.1 \times 10^{-3} \text{ s}^{-1}$$

- **(Diallyl)isopropoxyborinane-methylamine adduct (1f) without copper(I) catalyst**

Conditions of experiment: 2Br-4F-Ph Ellman's imine **2a** (200  $\mu\text{l}$ , 0.04 M), no catalyst - *i*PrOH (200  $\mu\text{l}$ ), 10 eq. DABMA(*Oi*Pr) **1f** (400  $\mu\text{l}$ , 0.2 M), solvent - *i*PrOH,  $T = 25.0$  °C.

| Nº | A <sup>307</sup> | t, sec | c, M   | lnC     |
|----|------------------|--------|--------|---------|
| 0  | 1,474            | 0      | 0,0107 | -4,5401 |
| 1  | 1,437            | 15     | 0,0104 | -4,5655 |
| 2  | 1,409            | 30     | 0,0102 | -4,5852 |
| 3  | 1,380            | 45     | 0,0100 | -4,606  |
| 4  | 1,335            | 60     | 0,0097 | -4,6392 |
| 5  | 1,315            | 75     | 0,0095 | -4,6542 |
| 6  | 1,278            | 90     | 0,0093 | -4,6828 |

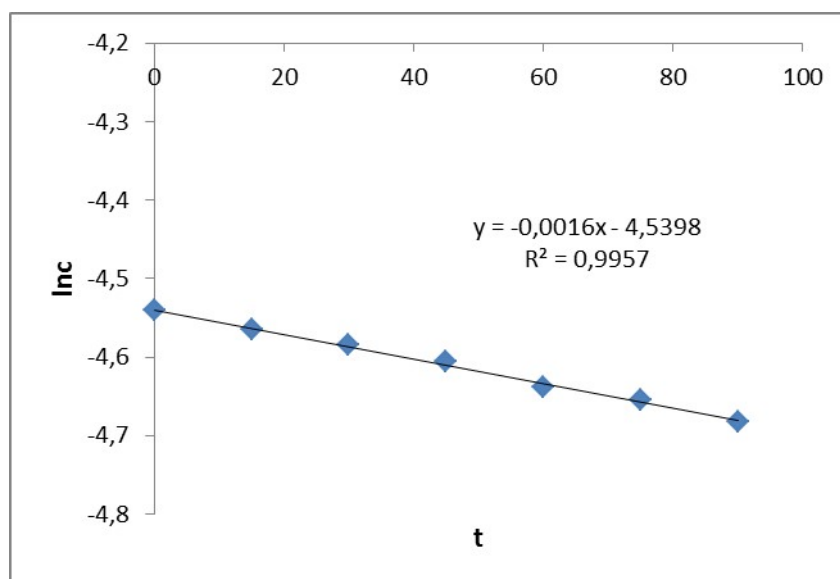

$$k_{\text{obs}} = 1.6 \pm 0.1 \times 10^{-3} \text{s}^{-1}$$

- **(Diallyl)isopropoxyborinane-methylamine adduct (1f) without copper(I) catalyst and with addition of MeNH<sub>2</sub>**

Conditions of experiment: 2Br-4F-Ph Ellman's imine **2a** (200  $\mu\text{l}$ , 0.04 M), no catalyst - *i*PrOH (200  $\mu\text{l}$ ), 10 eq. DABMA(O*i*Pr) **1f** +20 eq MeNH<sub>2</sub> (400  $\mu\text{l}$ , 0.2 M), solvent – *i*PrOH, T = 25.0  $^{\circ}\text{C}$ .

| N <sup>o</sup> | A <sup>307</sup> | t, sec | c, M   | lnC     |
|----------------|------------------|--------|--------|---------|
| 0              | 1,361            | 0      | 0,0099 | -4,6199 |
| 1              | 1,350            | 15     | 0,0098 | -4,6280 |
| 2              | 1,314            | 75     | 0,0095 | -4,6550 |
| 3              | 0,952            | 900    | 0,0069 | -4,9773 |
| 4              | 0,845            | 1200   | 0,0061 | -5,0965 |
| 5              | 0,773            | 1500   | 0,0056 | -5,1856 |
| 6              | 0,691            | 1800   | 0,0050 | -5,2977 |

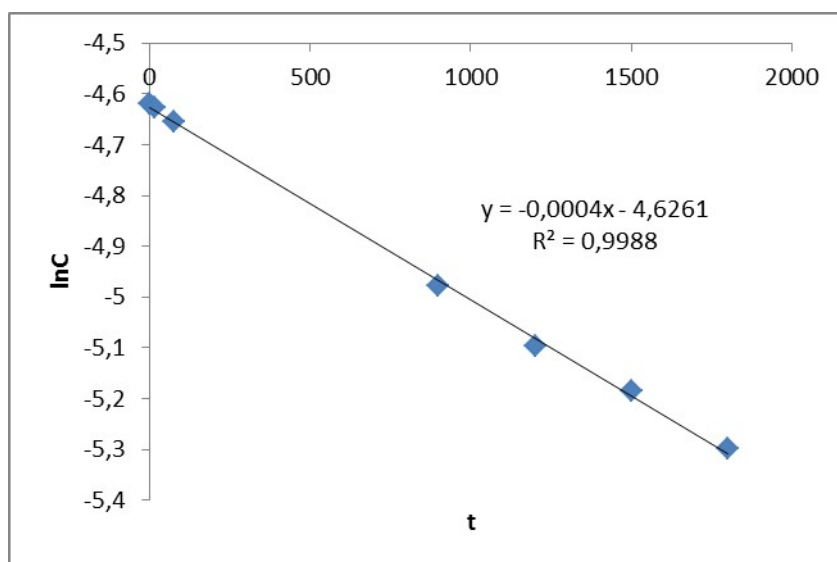

$$k_{\text{obs}} = 0.37 \pm 0.02 \times 10^{-3} \text{s}^{-1}$$

- **(Diallyl)isopropoxyborinane-methylamine adduct (1f) with copper(I) catalyst**

Conditions of experiment: 2Br-4F-Ph Ellman's imine **2a** (200  $\mu\text{l}$ , 0.04 M), 0.05 mol% Cu(PPh<sub>3</sub>)<sub>3</sub>F\*2EtOH [Cu-**1**] (200  $\mu\text{l}$ , 0.002 M), 10 eq. DABMA(O*i*Pr) **1f** (400  $\mu\text{l}$ , 0.2M) + 400  $\mu\text{l}$  of *i*PrOH, solvent – *i*PrOH, T = 25.0  $^{\circ}\text{C}$ .

| N <sup>o</sup> | A <sup>307</sup> | t, sec | c, M   | lnC     |
|----------------|------------------|--------|--------|---------|
| 0              | 1,308            | 0      | 0,0095 | -4,6596 |
| 1              | 1,203            | 5      | 0,0087 | -4,7433 |
| 2              | 1,069            | 10     | 0,0077 | -4,8614 |
| 3              | 0,938            | 15     | 0,0068 | -4,9921 |
| 4              | 0,857            | 20     | 0,0062 | -5,0824 |
| 5              | 0,751            | 25     | 0,0054 | -5,2144 |

|    |       |    |        |         |
|----|-------|----|--------|---------|
| 6  | 0,688 | 30 | 0,0050 | -5,3021 |
| 7  | 0,601 | 35 | 0,0044 | -5,4372 |
| 8  | 0,543 | 40 | 0,0039 | -5,5387 |
| 9  | 0,489 | 45 | 0,0035 | -5,6435 |
| 10 | 0,436 | 50 | 0,0032 | -5,7582 |

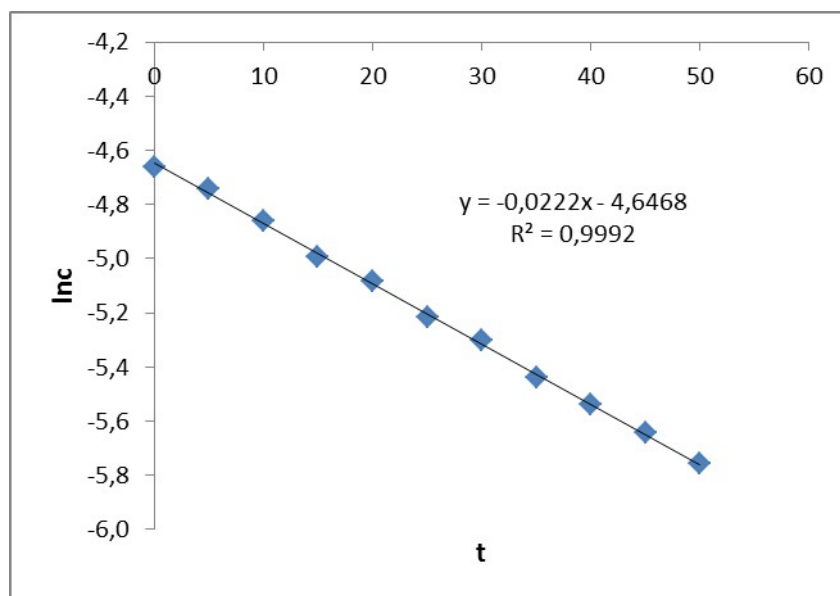

$$k_{\text{obs}} = 22.2 \pm 0.5 \times 10^{-3} \text{s}^{-1} \text{ (at 0.05 mol\% of [Cu-1] with 1.5 times dilution)}$$

$$k_{\text{obs}} = 33.3 \pm 0.8 \times 10^{-3} \text{s}^{-1} \text{ (at 0.05 mol\% of [Cu-1] without 1.5 times dilution)}$$

$$k_{\text{calculated}} = 3330 \pm 75 \times 10^{-3} \text{s}^{-1} \text{ (at 5 mol\% of [Cu-1] without 1.5 times dilution)}$$

### Rate constants of allylation of imine **2a** with triallylborane-methylamine adduct **1a** in isopropyl alcohol with addition of MeNH<sub>2</sub> (Figure 3 of the main text)

- Addition of 0.25 eq. of MeNH<sub>2</sub>

Conditions of experiment: 2Br-4F-Ph Ellman's imine **2a** (200  $\mu$ l, 0.04 M), 5 mol% Cu(PPh<sub>3</sub>)<sub>3</sub>F\*2EtOH [**Cu-1**] (200  $\mu$ l, 0.002 M), 10 eq. TABMA **1a** + 0.25 eq. MeNH<sub>2</sub> (400  $\mu$ l, 0.2 M), solvent – *i*PrOH, T = 25.0 °C. MeNH<sub>2</sub> was added as 6 M solution in *i*PrOH.

| N <sup>o</sup> | A <sup>307</sup> | t, sec | c, M   | lnC     |
|----------------|------------------|--------|--------|---------|
| 0              | 1,354            | 0      | 0,0098 | -4,6250 |
| 1              | 0,893            | 15     | 0,0065 | -5,0413 |
| 2              | 0,616            | 30     | 0,0045 | -5,4126 |
| 3              | 0,432            | 45     | 0,0031 | -5,7674 |
| 4              | 0,321            | 60     | 0,0023 | -6,0644 |
| 5              | 0,210            | 75     | 0,0015 | -6,4887 |
| 6              | 0,164            | 90     | 0,0012 | -6,7360 |

|   |       |     |        |         |
|---|-------|-----|--------|---------|
| 7 | 0,098 | 105 | 0,0007 | -7,2509 |
| 8 | 0,072 | 120 | 0,0005 | -7,5592 |

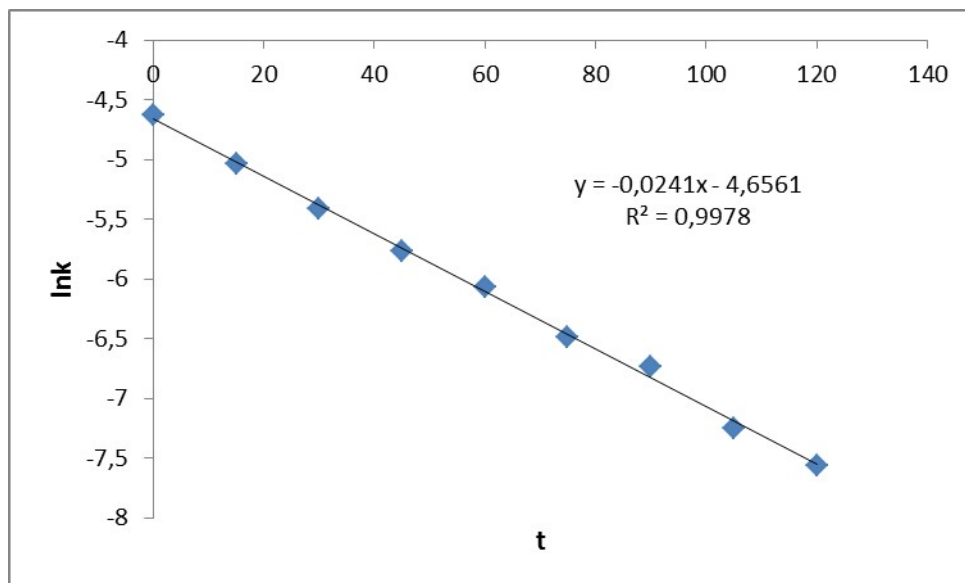

$$k_{\text{obs}} = 24.1 \pm 1.0 \times 10^{-3} \text{s}^{-1}$$

- **Addition of 0.5 eq. of MeNH<sub>2</sub>**

Conditions of experiment: 2Br-4F-Ph Ellman's imine **2a** (200  $\mu\text{l}$ , 0.04 M), 5 mol% Cu(PPh<sub>3</sub>)<sub>3</sub>F\*2EtOH [**Cu-1**] (200  $\mu\text{l}$ , 0.002 M), 10 eq. TABMA **1a** + 0.5 eq. MeNH<sub>2</sub> (400  $\mu\text{l}$ , 0.2 M), solvent – *i*PrOH, T = 25.0 °C. MeNH<sub>2</sub> was added as 6 M solution in *i*PrOH.

| N <sup>o</sup> | A <sup>307</sup> | t, sec | c, M   | lnC     |
|----------------|------------------|--------|--------|---------|
| 0              | 1,245            | 0      | 0,0090 | -4,7089 |
| 1              | 0,777            | 25     | 0,0056 | -5,1804 |
| 2              | 0,696            | 30     | 0,0050 | -5,2905 |
| 3              | 0,507            | 45     | 0,0037 | -5,6073 |
| 4              | 0,388            | 60     | 0,0028 | -5,8748 |
| 5              | 0,294            | 75     | 0,0021 | -6,1523 |
| 6              | 0,216            | 90     | 0,0016 | -6,4606 |
| 7              | 0,162            | 105    | 0,0012 | -6,7482 |

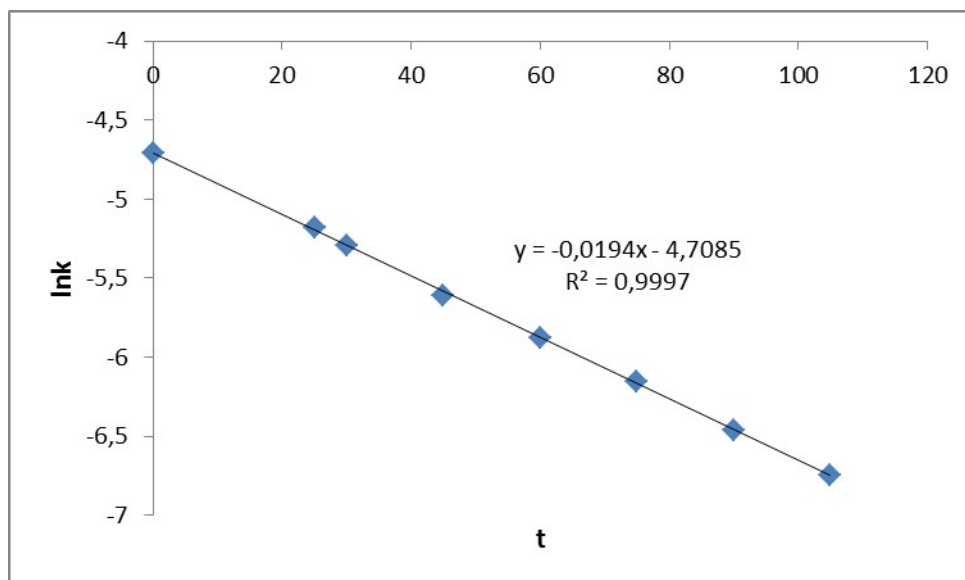

$$k_{\text{obs}} = 19.4 \pm 0.3 \times 10^{-3} \text{s}^{-1}$$

- **Addition of 1 eq. of MeNH<sub>2</sub>**

Conditions of experiment: 2Br-4F-Ph Ellman's imine **2a** (200  $\mu\text{l}$ , 0.04 M), 5 mol% Cu(PPh<sub>3</sub>)<sub>3</sub>F\*2EtOH [**Cu-1**] (200  $\mu\text{l}$ , 0.002 M), 10 eq. TABMA **1a** + 1 eq. MeNH<sub>2</sub> (400  $\mu\text{l}$ , 0.2 M), solvent – *i*PrOH, T = 25.0 °C. MeNH<sub>2</sub> was added as 6 M solution in *i*PrOH.

| N <sup>o</sup> | A <sup>307</sup> | t, sec | c, M   | lnC     |
|----------------|------------------|--------|--------|---------|
| 0              | 1,326            | 0      | 0,0096 | -4,6459 |
| 1              | 1,020            | 15     | 0,0074 | -4,9083 |
| 2              | 0,787            | 30     | 0,0057 | -5,1676 |
| 3              | 0,620            | 45     | 0,0045 | -5,4061 |
| 4              | 0,516            | 60     | 0,0037 | -5,5897 |
| 5              | 0,382            | 75     | 0,0028 | -5,8904 |
| 6              | 0,267            | 90     | 0,0019 | -6,2486 |
| 7              | 0,211            | 105    | 0,0015 | -6,4840 |
| 8              | 0,148            | 120    | 0,0011 | -6,8386 |



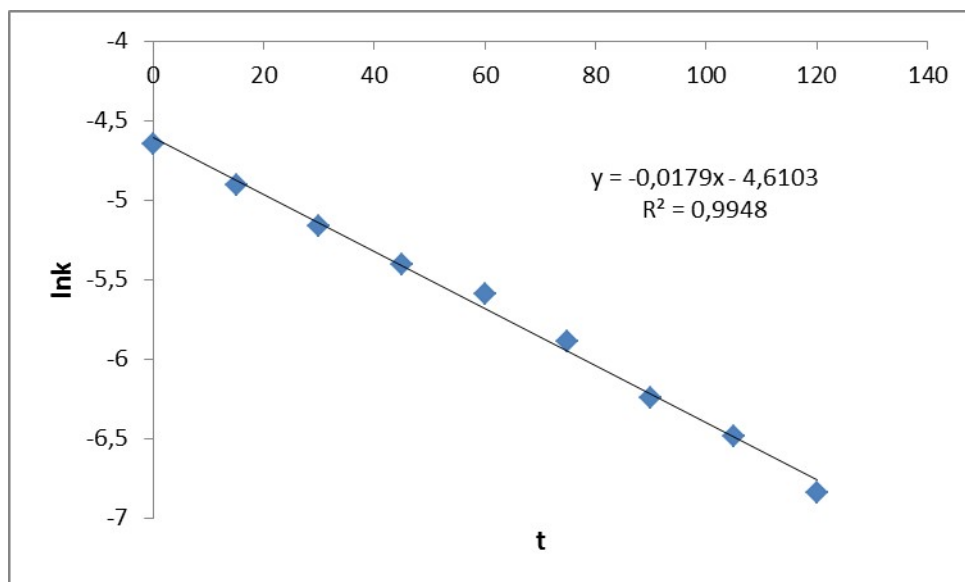

$$k_{\text{obs}} = 17.9 \pm 0.8 \times 10^{-3} \text{s}^{-1}$$

- **Addition of 2 eq. of MeNH<sub>2</sub>**

Conditions of experiment: 2Br-4F-Ph Ellman's imine **2a** (200 μl, 0.04 M), 5 mol% Cu(PPh<sub>3</sub>)<sub>3</sub>F\*2EtOH [**Cu-1**] (200 μl, 0.002 M), 10 eq. TABMA **1a** + 2 eq. MeNH<sub>2</sub> (400 μl, 0.2 M), solvent – *i*PrOH, T = 25.0 °C. MeNH<sub>2</sub> was added as 6 M solution in *i*PrOH.

| N <sub>o</sub> | A <sup>307</sup> | t, sec | c, M   | lnC     |
|----------------|------------------|--------|--------|---------|
| 0              | 1,401            | 0      | 0,0101 | -4,5909 |
| 1              | 1,012            | 15     | 0,0073 | -4,9162 |
| 2              | 0,825            | 30     | 0,0060 | -5,1205 |
| 3              | 0,613            | 45     | 0,0044 | -5,4175 |
| 4              | 0,371            | 60     | 0,0027 | -5,9196 |
| 5              | 0,289            | 75     | 0,0021 | -6,1694 |
| 6              | 0,200            | 90     | 0,0014 | -6,5375 |
| 7              | 0,126            | 105    | 0,0009 | -6,9996 |

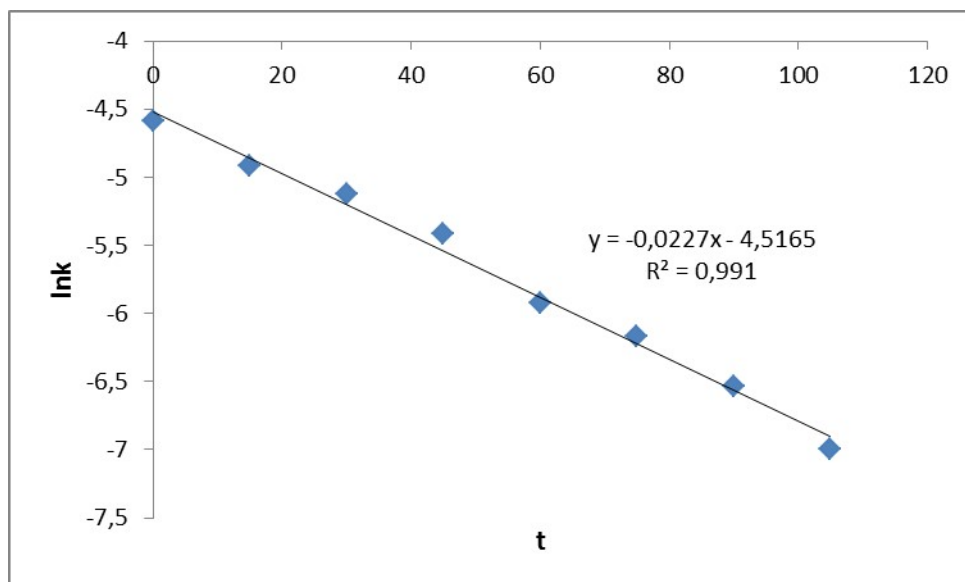

$$k_{\text{obs}} = 22.7 \pm 1.6 \times 10^{-3} \text{s}^{-1}$$

- **Addition of 3 eq. of MeNH<sub>2</sub>**

Conditions of experiment: 2Br-4F-Ph Ellman's imine **2a** (200 μl, 0.04 M), 5 mol% Cu(PPh<sub>3</sub>)<sub>3</sub>F\*2EtOH [**Cu-1**] (200 μl, 0.002 M), 10 eq. TABMA **1a** + 3 eq. MeNH<sub>2</sub> (400 μl, 0.2 M), solvent – *i*PrOH, T = 25.0 °C. MeNH<sub>2</sub> was added as 6 M solution in *i*PrOH.

| N <sub>o</sub> | A <sup>307</sup> | t, sec | c, M   | lnC     |
|----------------|------------------|--------|--------|---------|
| 0              | 1,311            | 0      | 0,0095 | -4,6573 |
| 1              | 1,063            | 15     | 0,0077 | -4,8670 |
| 2              | 0,847            | 30     | 0,0061 | -5,0941 |
| 3              | 0,568            | 45     | 0,0041 | -5,4937 |
| 4              | 0,384            | 60     | 0,0028 | -5,8852 |
| 5              | 0,283            | 75     | 0,0020 | -6,1904 |
| 6              | 0,191            | 90     | 0,0014 | -6,5836 |
| 7              | 0,164            | 105    | 0,0012 | -6,7360 |
| 8              | 0,123            | 120    | 0,0009 | -7,0237 |

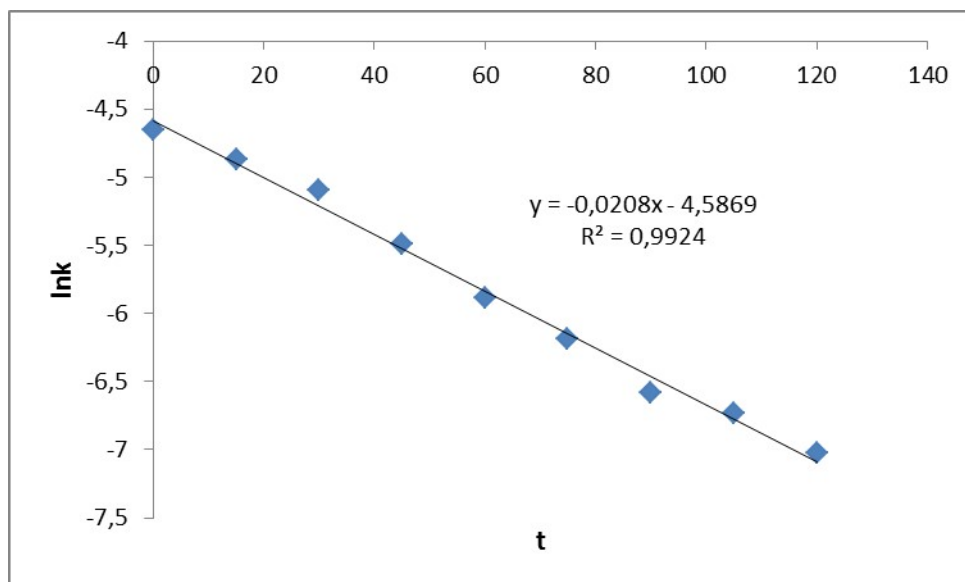

$$k_{\text{obs}} = 20.8 \pm 1.6 \times 10^{-3} \text{s}^{-1}$$

- **Addition of 5 eq. of MeNH<sub>2</sub>**

Conditions of experiment: 2Br-4F-Ph Ellman's imine **2a** (200  $\mu\text{l}$ , 0.04 M), 5 mol% Cu(PPh<sub>3</sub>)<sub>3</sub>F\*2EtOH [**Cu-1**] (200  $\mu\text{l}$ , 0.002 M), 10 eq. TABMA **1a** + 5 eq. MeNH<sub>2</sub> (400  $\mu\text{l}$ , 0.2 M), solvent – *i*PrOH, T = 25.0 °C. MeNH<sub>2</sub> was added as 6 M solution in *i*PrOH.

| N <sub>o</sub> | A <sup>307</sup> | t, sec | c, M   | lnC     |
|----------------|------------------|--------|--------|---------|
| 0              | 1,308            | 0      | 0,0095 | -4,6596 |
| 1              | 0,920            | 15     | 0,0067 | -5,0115 |
| 2              | 0,743            | 30     | 0,0054 | -5,2251 |
| 3              | 0,634            | 45     | 0,0046 | -5,3838 |
| 4              | 0,499            | 60     | 0,0036 | -5,6232 |
| 5              | 0,408            | 75     | 0,0030 | -5,8246 |
| 6              | 0,324            | 90     | 0,0023 | -6,0551 |
| 7              | 0,283            | 105    | 0,0020 | -6,1904 |

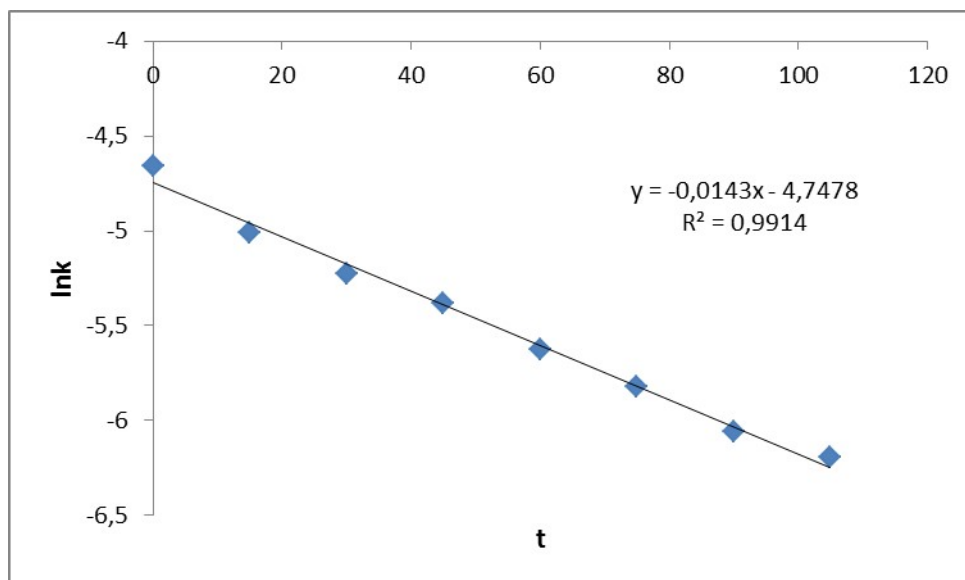

$$k_{\text{obs}} = 14.3 \pm 1.3 \times 10^{-3} \text{s}^{-1}$$

- **Addition of 10 eq. of MeNH<sub>2</sub>**

Conditions of experiment: 2Br-4F-Ph Ellman's imine **2a** (200  $\mu\text{l}$ , 0.04 M), 5 mol% Cu(PPh<sub>3</sub>)<sub>3</sub>F\*2EtOH [**Cu-1**] (200  $\mu\text{l}$ , 0.002 M), 10 eq. TABMA **1a** + 10 eq. MeNH<sub>2</sub> (400  $\mu\text{l}$ , 0.2 M), solvent – *i*PrOH, T = 25.0 °C. MeNH<sub>2</sub> was added as 6 M solution in *i*PrOH.

| N <sub>o</sub> | A <sup>307</sup> | t, sec | c, M   | lnC     |
|----------------|------------------|--------|--------|---------|
| 0              | 1,347            | 0      | 0,0098 | -4,6302 |
| 1              | 1,229            | 15     | 0,0089 | -4,7219 |
| 2              | 1,061            | 30     | 0,0077 | -4,8689 |
| 3              | 1,023            | 45     | 0,0074 | -4,9053 |
| 4              | 0,886            | 60     | 0,0064 | -5,0491 |
| 5              | 0,814            | 75     | 0,0059 | -5,1339 |
| 6              | 0,738            | 90     | 0,0053 | -5,2319 |
| 7              | 0,642            | 105    | 0,0046 | -5,3713 |
| 8              | 0,553            | 120    | 0,0040 | -5,5205 |

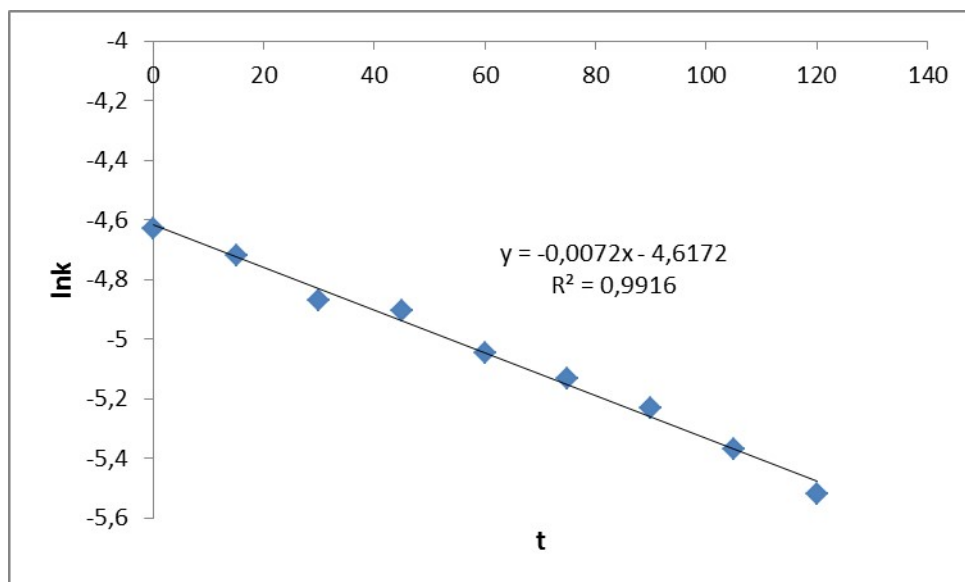

$$k_{\text{obs}} = 7.2 \pm 0.5 \times 10^{-3} \text{ s}^{-1}$$

- Dependence of the observed allylation rate on methylamine additive

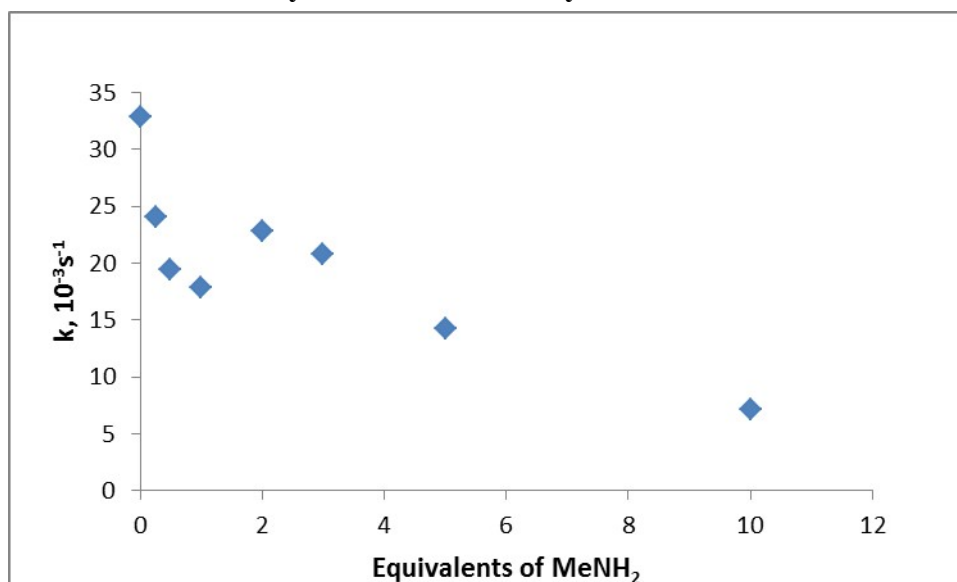

### Rate constants of allylation of imine **2a** with triallylborane-methylamine adduct **1a** in isopropyl alcohol with addition of Et<sub>3</sub>N (Figure 3 of the main text)

- Addition of 2 eq. of Et<sub>3</sub>N

Conditions of experiment: 2Br-4F-Ph Ellman's imine **2a** (200 μl, 0.04 M), 5 mol% Cu(PPh<sub>3</sub>)<sub>3</sub>F\*2EtOH [**Cu-1**] (200 μl, 0.002 M), 10 eq. TABMA **1a** + 2 eq. Et<sub>3</sub>N (400 μl, 0.2 M), solvent – *i*PrOH, T = 25.0 °C.

| № | A <sup>307</sup> | t, sec | c, M   | lnC     |
|---|------------------|--------|--------|---------|
| 0 | 1,425            | 0      | 0,0103 | -4,5739 |
| 1 | 0,971            | 15     | 0,0070 | -4,9575 |
| 2 | 0,794            | 30     | 0,0057 | -5,1588 |

|   |       |     |        |         |
|---|-------|-----|--------|---------|
| 3 | 0,580 | 45  | 0,0042 | -5,4728 |
| 4 | 0,431 | 60  | 0,0031 | -5,7697 |
| 5 | 0,311 | 75  | 0,0023 | -6,0960 |
| 6 | 0,234 | 90  | 0,0017 | -6,3805 |
| 7 | 0,164 | 105 | 0,0012 | -6,7360 |
| 8 | 0,112 | 120 | 0,0008 | -7,1173 |

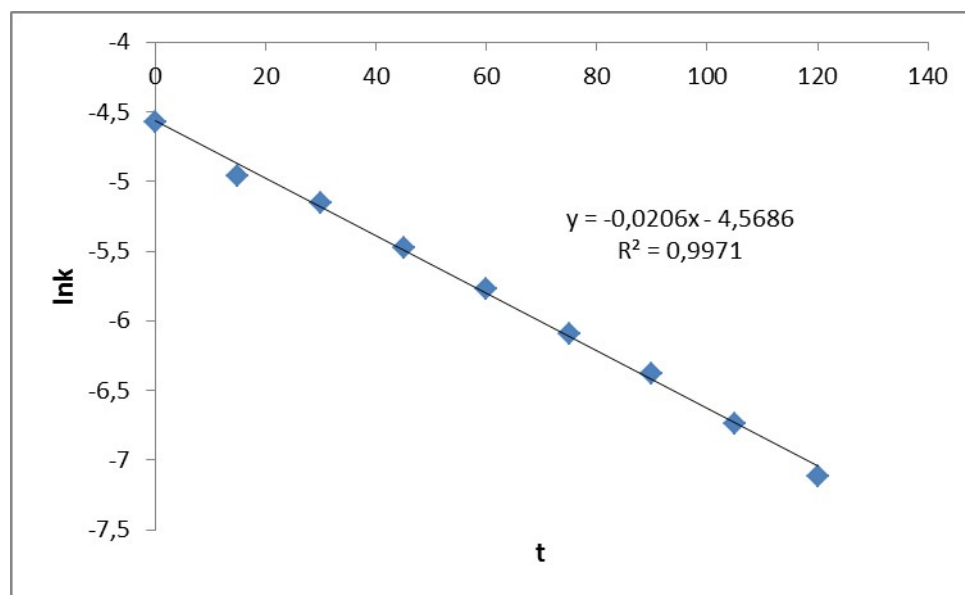

$$k_{\text{obs}} = 20.6 \pm 1.0 \times 10^{-3} \text{s}^{-1}$$

- **Addition of 5 eq. of Et<sub>3</sub>N**

Conditions of experiment: 2Br-4F-Ph Ellman's imine **2a** (200  $\mu$ l, 0.04 M), 5 mol% Cu(PPh<sub>3</sub>)<sub>3</sub>F\*2EtOH [**Cu-1**] (200  $\mu$ l, 0.002 M), 10 eq. TABMA **1a** + 5 eq. Et<sub>3</sub>N (400  $\mu$ l, 0.2 M), solvent – *i*PrOH, T = 25.0 °C.

| N <sub>o</sub> | A <sup>307</sup> | t, sec | c, M   | lnC     |
|----------------|------------------|--------|--------|---------|
| 0              | 1,396            | 0      | 0,0101 | -4,5945 |
| 1              | 0,971            | 15     | 0,0070 | -4,9575 |
| 2              | 0,769            | 30     | 0,0056 | -5,1907 |
| 3              | 0,543            | 45     | 0,0039 | -5,5387 |
| 4              | 0,467            | 60     | 0,0034 | -5,6895 |
| 5              | 0,331            | 75     | 0,0024 | -6,0337 |
| 6              | 0,243            | 90     | 0,0018 | -6,3428 |
| 7              | 0,188            | 105    | 0,0014 | -6,5994 |
| 8              | 0,140            | 120    | 0,0010 | -6,8942 |

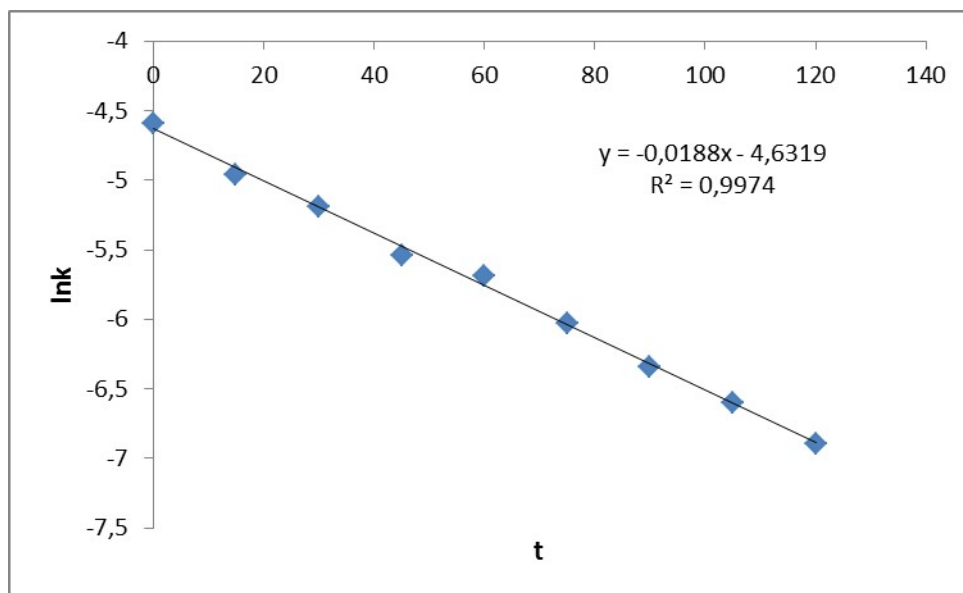

$$k_{\text{obs}} = 18.8 \pm 0.9 \times 10^{-3} \text{s}^{-1}$$

- **Addition of 8 eq. of Et<sub>3</sub>N**

Conditions of experiment: 2Br-4F-Ph Ellman's imine **2a** (200  $\mu$ l, 0.04 M), 5 mol% Cu(PPh<sub>3</sub>)<sub>3</sub>F\*2EtOH [**Cu-1**] (200  $\mu$ l, 0.002 M), 10 eq. TABMA **1a** + 8 eq. Et<sub>3</sub>N (400  $\mu$ l, 0.2 M), solvent – *i*PrOH, T = 25.0 °C.

| N <sub>0</sub> | A <sup>307</sup> | t, sec | c, M   | lnC     |
|----------------|------------------|--------|--------|---------|
| 0              | 1,304            | 0      | 0,0094 | -4,6626 |
| 1              | 0,952            | 15     | 0,0069 | -4,9773 |
| 2              | 0,754            | 30     | 0,0055 | -5,2104 |
| 3              | 0,539            | 45     | 0,0039 | -5,5461 |
| 4              | 0,387            | 60     | 0,0028 | -5,8774 |
| 5              | 0,255            | 75     | 0,0018 | -6,2946 |
| 6              | 0,183            | 90     | 0,0013 | -6,6264 |
| 7              | 0,124            | 105    | 0,0009 | -7,0156 |
| 8              | 0,091            | 120    | 0,0007 | -7,3250 |

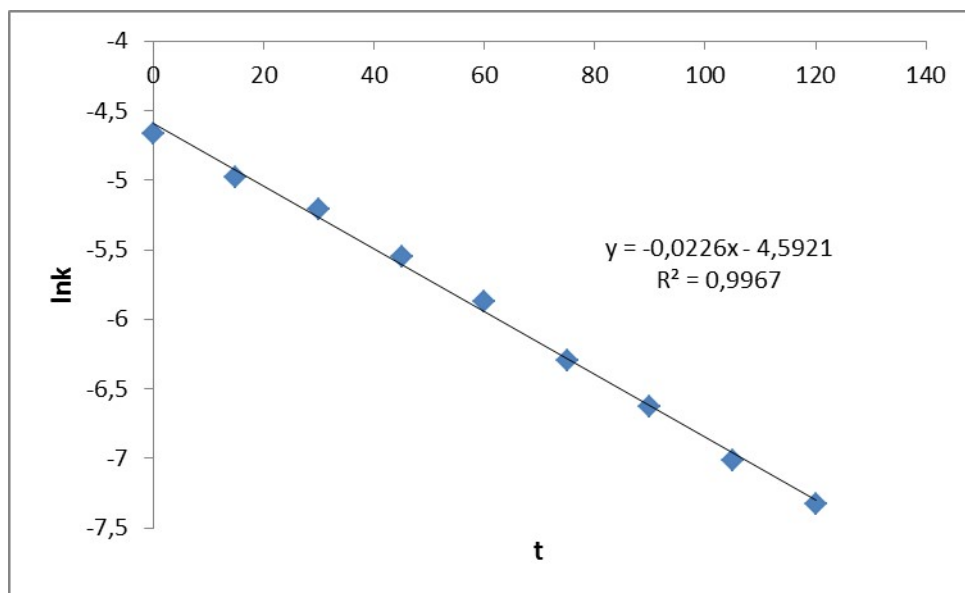

$$k_{\text{obs}} = 22.6 \pm 1.2 \times 10^{-3} \text{ s}^{-1}$$

- **Addition of 9 eq. of Et<sub>3</sub>N**

Conditions of experiment: 2Br-4F-Ph Ellman's imine **2a** (200 μl, 0.04 M), 5 mol% Cu(PPh<sub>3</sub>)<sub>3</sub>F\*2EtOH [**Cu-1**] (200 μl, 0.002 M), 10 eq. TABMA **1a** + 9 eq. Et<sub>3</sub>N (400 μl, 0.2 M), solvent – *i*PrOH, T = 25.0 °C.

| N <sub>o</sub> | A <sup>307</sup> | t, sec | c, M   | lnC     |
|----------------|------------------|--------|--------|---------|
| 0              | 1,304            | 0      | 0,0094 | -4,6626 |
| 1              | 1,076            | 15     | 0,0078 | -4,8548 |
| 2              | 0,680            | 30     | 0,0049 | -5,3137 |
| 3              | 0,462            | 45     | 0,0033 | -5,7003 |
| 4              | 0,294            | 60     | 0,0021 | -6,1523 |
| 5              | 0,197            | 75     | 0,0014 | -6,5526 |
| 6              | 0,152            | 90     | 0,0011 | -6,8120 |
| 7              | 0,108            | 105    | 0,0008 | -7,1537 |
| 8              | 0,074            | 120    | 0,0005 | -7,5318 |



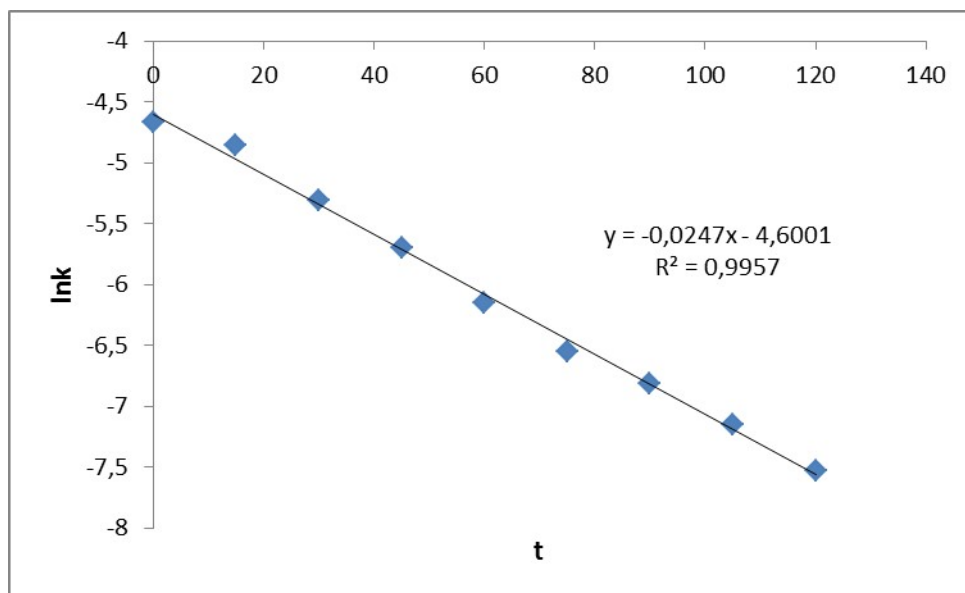

$$k_{\text{obs}} = 24.7 \pm 1.5 \times 10^{-3} \text{s}^{-1}$$

- **Addition of 10 eq. of Et<sub>3</sub>N**

Conditions of experiment: 2Br-4F-Ph Ellman's imine **2a** (200  $\mu$ l, 0.04 M), 5 mol% Cu(PPh<sub>3</sub>)<sub>3</sub>F\*2EtOH [**Cu-1**] (200  $\mu$ l, 0.002 M), 10 eq. TABMA **1a** + 10 eq. Et<sub>3</sub>N (400  $\mu$ l, 0.2 M), solvent – *i*PrOH, T = 25.0 °C.

| N <sup>o</sup> | A <sup>307</sup> | t, sec | c, M   | lnC     |
|----------------|------------------|--------|--------|---------|
| 0              | 1,326            | 0      | 0,0096 | -4,6459 |
| 1              | 0,971            | 15     | 0,0070 | -4,9575 |
| 2              | 0,567            | 30     | 0,0041 | -5,4955 |
| 3              | 0,456            | 45     | 0,0033 | -5,7133 |
| 4              | 0,274            | 60     | 0,0020 | -6,2227 |
| 5              | 0,192            | 75     | 0,0014 | -6,5783 |
| 6              | 0,165            | 90     | 0,0012 | -6,7299 |
| 7              | 0,101            | 105    | 0,0007 | -7,2207 |
| 8              | 0,066            | 120    | 0,0005 | -7,6462 |

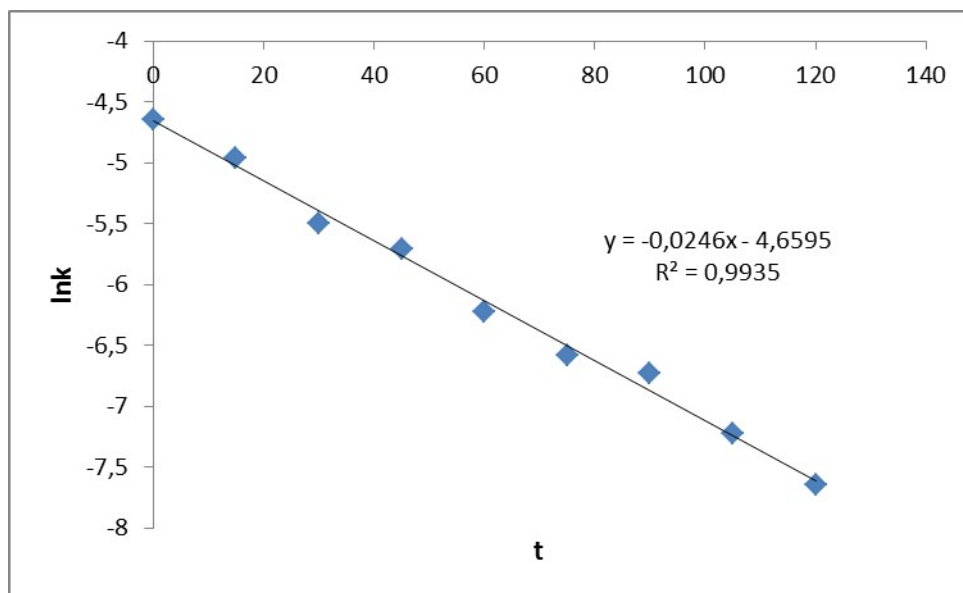

$$k_{\text{obs}} = 24.6 \pm 1.8 \times 10^{-3} \text{s}^{-1}$$

- **Addition of 20 eq. of Et<sub>3</sub>N**

Conditions of experiment: 2Br-4F-Ph Ellman's imine **2a** (200  $\mu$ l, 0.04 M), 5 mol% Cu(PPh<sub>3</sub>)<sub>3</sub>F\*2EtOH [**Cu-1**] (200  $\mu$ l, 0.002 M), 10 eq. TABMA **1a** + 20 eq. Et<sub>3</sub>N (400  $\mu$ l, 0.2 M), solvent – *i*PrOH, T = 25.0 °C.

| N <sub>0</sub> | A <sup>307</sup> | t, sec | c, M   | lnC     |
|----------------|------------------|--------|--------|---------|
| 0              | 1,334            | 0      | 0,0097 | -4,6399 |
| 1              | 0,928            | 15     | 0,0067 | -5,0028 |
| 2              | 0,736            | 30     | 0,0053 | -5,2346 |
| 3              | 0,582            | 45     | 0,0042 | -5,4694 |
| 4              | 0,434            | 60     | 0,0031 | -5,7628 |
| 5              | 0,378            | 75     | 0,0027 | -5,9009 |
| 6              | 0,254            | 90     | 0,0018 | -6,2985 |
| 7              | 0,205            | 105    | 0,0015 | -6,5128 |
| 8              | 0,145            | 120    | 0,0010 | -6,8591 |

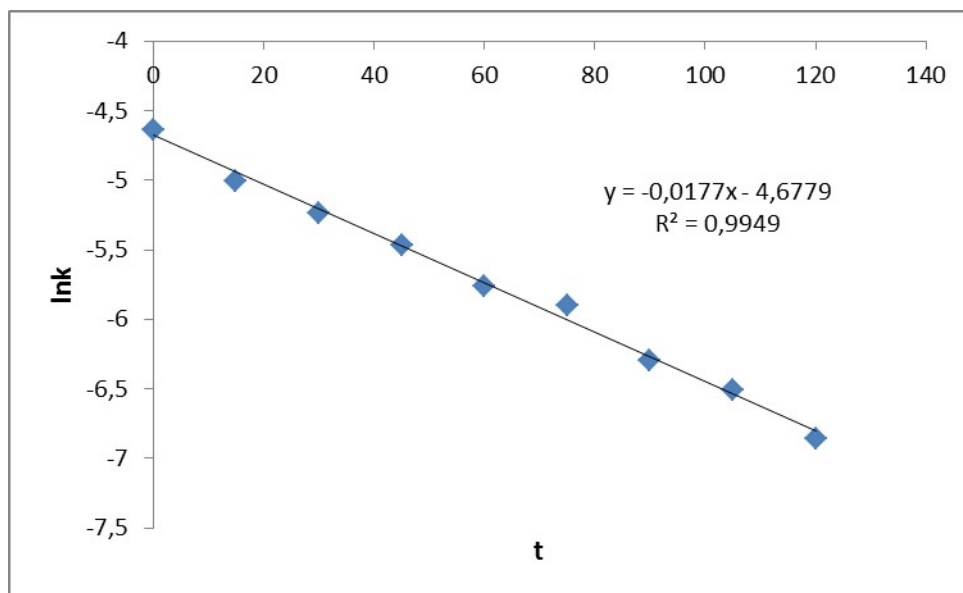

$$k_{\text{obs}} = 17.7 \pm 1.1 \times 10^{-3} \text{ s}^{-1}$$

- Dependence of the observed allylation rate on  $\text{Et}_3\text{N}$  additive

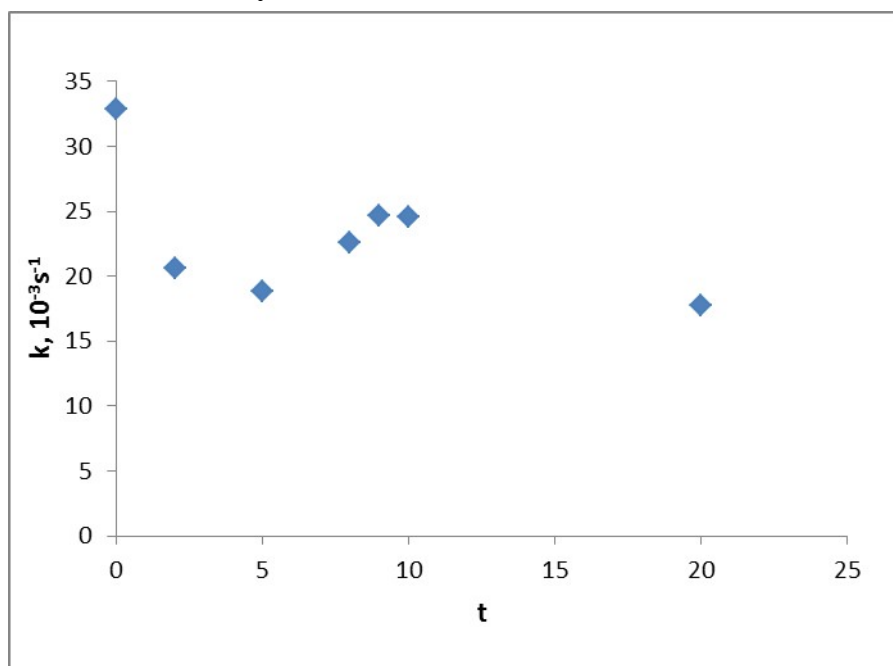

### Rate constants of allylation of imine **2a** with triallylborane-methylamine adduct **1a** in isopropyl alcohol with addition of DABCO (Figure 3 of the main text)

- Addition of 5 eq. of DABCO

Conditions of experiment: 2Br-4F-Ph Ellman's imine **2a** (200  $\mu\text{l}$ , 0.04 M), 5 mol%  $\text{Cu}(\text{PPh}_3)_3\text{F} \cdot 2\text{EtOH}$  [**Cu-1**] (200  $\mu\text{l}$ , 0.002 M), 10 eq. TABMA **1a** + 5 eq. DABCO (400  $\mu\text{l}$ , 0.2 M), solvent – *i*PrOH, T = 25.0 °C.

| N <sup>o</sup> | A <sup>307</sup> | t, sec | c, M   | lnC     |
|----------------|------------------|--------|--------|---------|
| 0              | 1,466            | 0      | 0,0106 | -4,5455 |

|   |       |     |        |         |
|---|-------|-----|--------|---------|
| 1 | 0,989 | 15  | 0,0072 | -4,9391 |
| 2 | 0,851 | 30  | 0,0062 | -5,0894 |
| 3 | 0,529 | 45  | 0,0038 | -5,5649 |
| 4 | 0,415 | 60  | 0,0030 | -5,8076 |
| 5 | 0,282 | 75  | 0,0020 | -6,1939 |
| 6 | 0,202 | 90  | 0,0015 | -6,5276 |
| 7 | 0,165 | 105 | 0,0012 | -6,7299 |
| 8 | 0,120 | 120 | 0,0009 | -7,0483 |

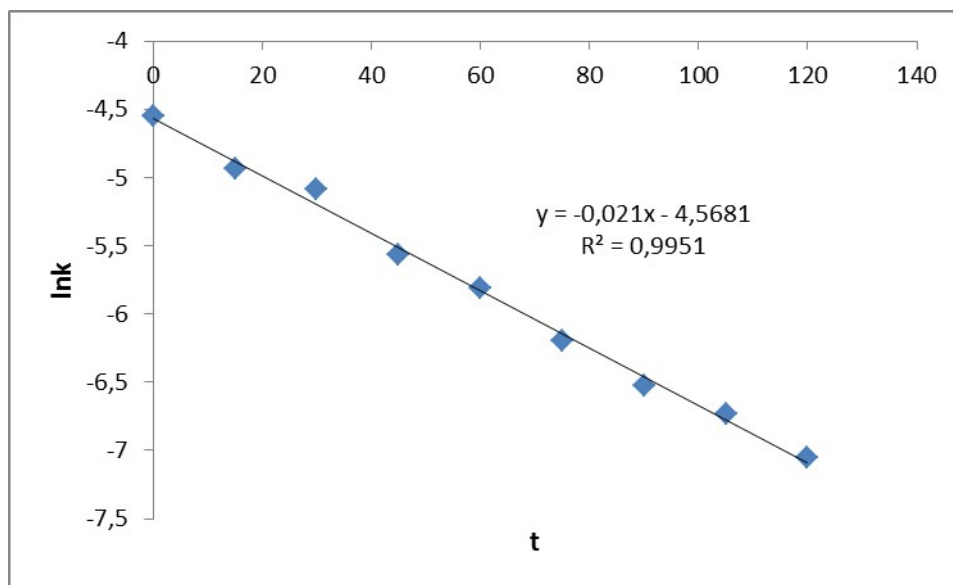

$$k_{\text{obs}} = 21.0 \pm 1.3 \times 10^{-3} \text{s}^{-1}$$

- **Addition of 10 eq. of DABCO**

Conditions of experiment: 2Br-4F-Ph Ellman's imine **2a** (200  $\mu\text{l}$ , 0.04 M), 5 mol%  $\text{Cu}(\text{PPh}_3)_3\text{F} \cdot 2\text{EtOH}$  [**Cu-1**] (200  $\mu\text{l}$ , 0.002 M), 10 eq. TABMA **1a** + 10 eq. DABCO (400  $\mu\text{l}$ , 0.2 M), solvent – *i*PrOH, T = 25.0 °C.

| Nº | A <sup>307</sup> | t, sec | c, M   | lnC     |
|----|------------------|--------|--------|---------|
| 0  | 1,402            | 0      | 0,0102 | -4,5902 |
| 1  | 1,207            | 15     | 0,0087 | -4,7399 |
| 2  | 0,983            | 30     | 0,0071 | -4,9452 |
| 3  | 0,814            | 45     | 0,0059 | -5,1339 |
| 4  | 0,683            | 60     | 0,0049 | -5,3093 |
| 5  | 0,598            | 75     | 0,0043 | -5,4422 |
| 6  | 0,429            | 90     | 0,0031 | -5,7744 |
| 7  | 0,376            | 105    | 0,0027 | -5,9063 |
| 8  | 0,316            | 120    | 0,0023 | -6,0801 |

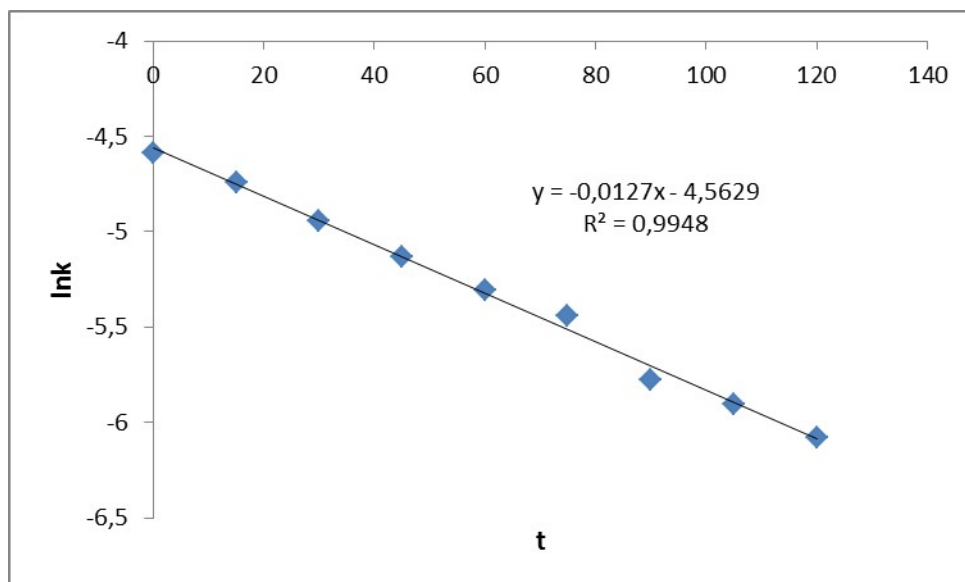

$$k_{\text{obs}} = 12.7 \pm 0.8 \times 10^{-3} \text{s}^{-1}$$

- **Addition of 20 eq. of DABCO**

Conditions of experiment: 2Br-4F-Ph Ellman's imine **2a** (200  $\mu\text{l}$ , 0.04 M), 5 mol%  $\text{Cu}(\text{PPh}_3)_3\text{F} \cdot 2\text{EtOH}$  [**Cu-1**] (200  $\mu\text{l}$ , 0.002 M), 10 eq. TABMA **1a** + 20 eq. DABCO (400  $\mu\text{l}$ , 0.2 M), solvent – *i*PrOH, T = 25.0 °C.

| Nº | A <sup>307</sup> | t, sec | c, M   | lnC     |
|----|------------------|--------|--------|---------|
| 0  | 1,466            | 0      | 0,0106 | -4,5455 |
| 1  | 0,989            | 15     | 0,0072 | -4,9391 |
| 2  | 0,851            | 30     | 0,0062 | -5,0894 |
| 3  | 0,629            | 45     | 0,0046 | -5,3917 |
| 4  | 0,457            | 60     | 0,0033 | -5,7112 |
| 5  | 0,326            | 75     | 0,0024 | -6,0489 |
| 6  | 0,244            | 90     | 0,0018 | -6,3387 |
| 7  | 0,175            | 105    | 0,0013 | -6,6711 |
| 8  | 0,134            | 120    | 0,0010 | -6,9380 |

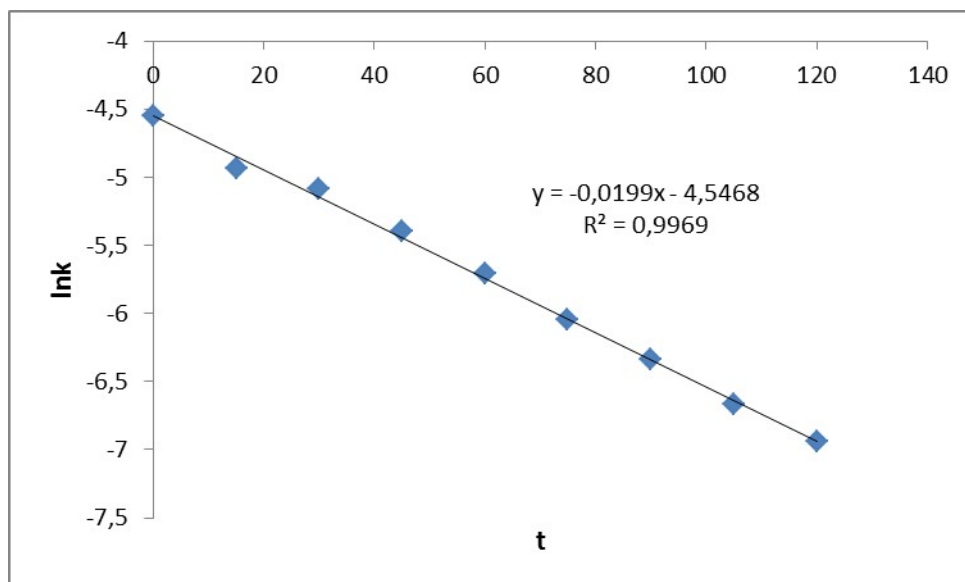

$$k_{\text{obs}} = 19.9 \pm 1.0 \times 10^{-3} \text{ s}^{-1}$$

- **Dependence of the observed allylation rate on DABCO additive**

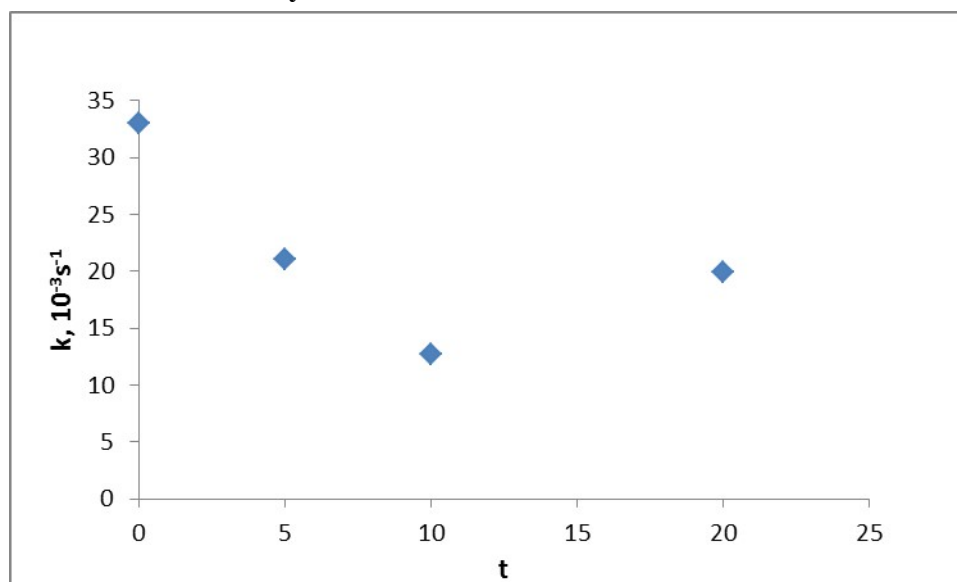

### Rate constants of allylation of imine **2a** with triallylborane-methylamine adduct **1a** in isopropyl alcohol with addition of PPh<sub>3</sub> (Figure 4 of the main text)

- **Addition of 1 eq. of PPh<sub>3</sub>**

Conditions of experiment: 2Br-4F-Ph Ellman's imine **2a** (200 μl, 0.04 M), 5 mol% Cu(PPh<sub>3</sub>)<sub>3</sub>F\*2EtOH [**Cu-1**] + 5 mol% PPh<sub>3</sub> (200 μl, 0.002 M), 10 eq. TABMA **1a** (400 μl, 0.2 M), solvent – *i*PrOH, T = 25.0 °C.

| N <sup>o</sup> | A <sup>307</sup> | t, sec | c, M   | lnC     |
|----------------|------------------|--------|--------|---------|
| 0              | 1,465            | 0      | 0,0106 | -4,5462 |
| 1              | 0,948            | 15     | 0,0069 | -4,9815 |
| 2              | 0,711            | 30     | 0,0051 | -5,2692 |

|   |       |    |        |         |
|---|-------|----|--------|---------|
| 3 | 0,553 | 45 | 0,0040 | -5,5205 |
| 4 | 0,386 | 60 | 0,0028 | -5,8800 |
| 5 | 0,280 | 75 | 0,0020 | -6,2011 |

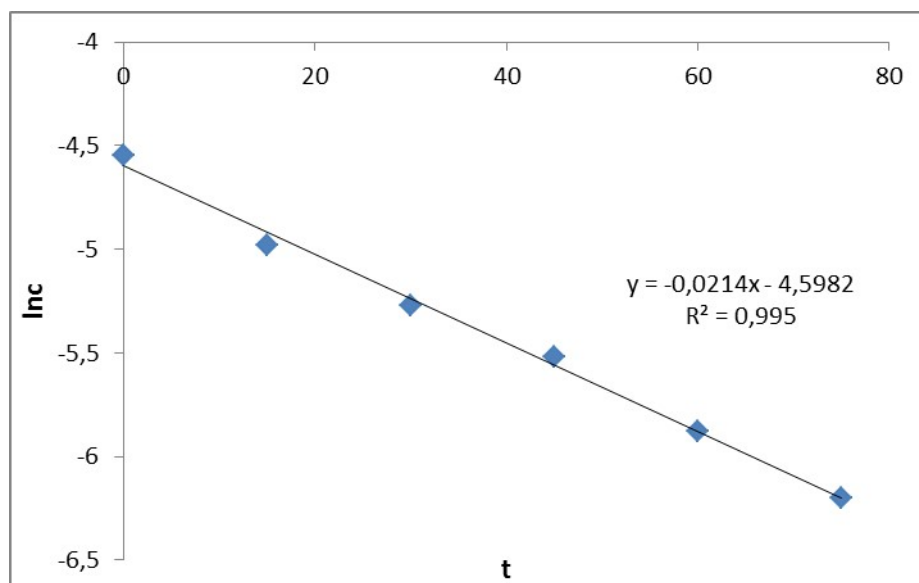

$$k_{\text{obs}} = 21.4 \pm 0.5 \times 10^{-3} \text{s}^{-1}$$

- **Addition of 2 eq. of PPh<sub>3</sub>**

Conditions of experiment: 2Br-4F-Ph Ellman's imine **2a** (200 μl, 0.04 M), 5 mol% Cu(PPh<sub>3</sub>)<sub>3</sub>F\*2EtOH [**Cu-1**] + 10 mol% PPh<sub>3</sub> (200 μl, 0.002 M), 10 eq. TABMA **1a** (400 μl, 0.2 M), solvent – *i*PrOH, T = 25.0 °C.

| Nº | A <sup>307</sup> | t, sec | c, M   | lnC     |
|----|------------------|--------|--------|---------|
| 0  | 1,465            | 0      | 0,0106 | -4,5462 |
| 1  | 1,069            | 15     | 0,0077 | -4,8614 |
| 2  | 0,813            | 30     | 0,0059 | -5,1351 |
| 3  | 0,660            | 45     | 0,0048 | -5,3436 |
| 4  | 0,514            | 60     | 0,0037 | -5,5936 |
| 5  | 0,367            | 75     | 0,0027 | -5,9305 |

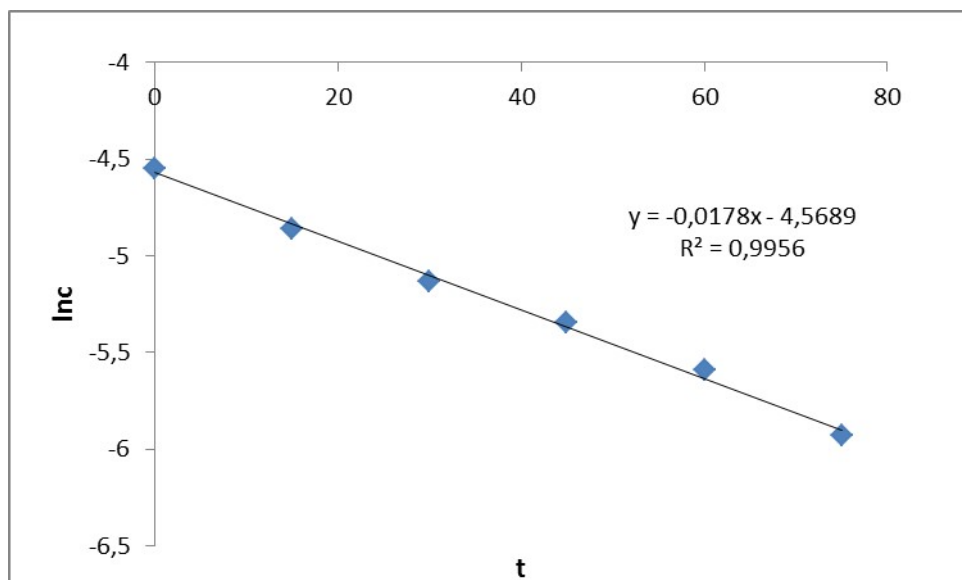

$$k_{\text{obs}} = 17.8 \pm 0.3 \times 10^{-3} \text{s}^{-1}$$

- **Addition of 3 eq. of PPh<sub>3</sub>**

Conditions of experiment: 2Br-4F-Ph Ellman's imine **2a** (200  $\mu\text{l}$ , 0.04 M), 5 mol% Cu(PPh<sub>3</sub>)<sub>3</sub>F\*2EtOH [**Cu-1**] + 15 mol% PPh<sub>3</sub> (200  $\mu\text{l}$ , 0.002 M), 10 eq. TABMA **1a** (400  $\mu\text{l}$ , 0.2 M), solvent – *i*PrOH, T = 25.0 °C.

| Nº | A <sup>307</sup> | t, sec | c, M   | lnC     |
|----|------------------|--------|--------|---------|
| 0  | 1,465            | 0      | 0,0106 | -4,5462 |
| 1  | 1,056            | 15     | 0,0076 | -4,8736 |
| 2  | 0,864            | 30     | 0,0063 | -5,0743 |
| 3  | 0,702            | 45     | 0,0051 | -5,2819 |
| 4  | 0,536            | 60     | 0,0039 | -5,5517 |
| 5  | 0,423            | 75     | 0,0031 | -5,7885 |

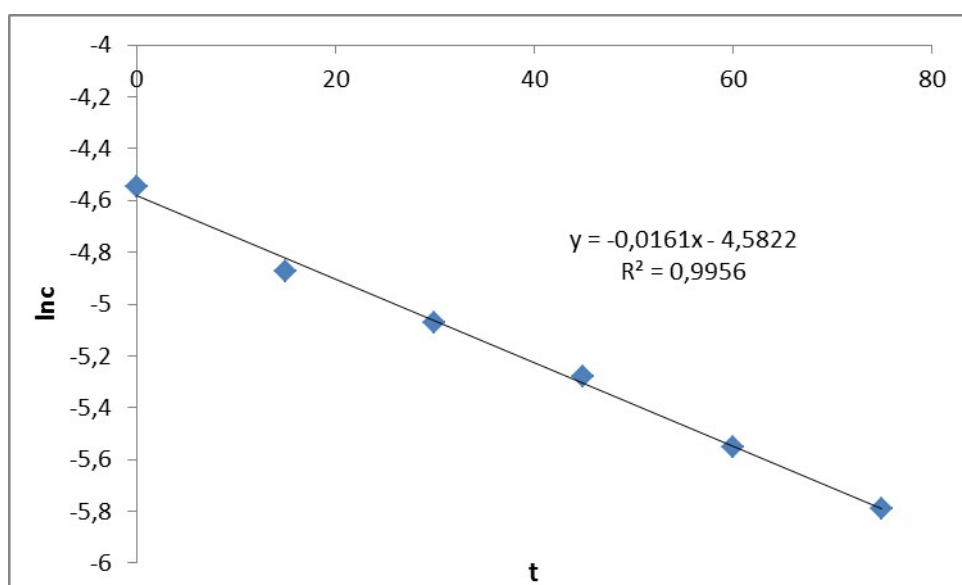

$$k_{\text{obs}} = 16.1 \pm 0.3 \times 10^{-3} \text{s}^{-1}$$



## Rate constants of allylation of imine **2a** with triallylborane-methylamine adduct **1a** in isopropyl alcohol with using of different copper catalysts (Table 3 of the main text)

- *bis*(Triphenylphosphine)-copper(I)-bis( $\mu_2$ -ethoxy)-difluoroborate [**Cu-2**]

Conditions of experiment: 2Br-4F-Ph Ellman's imine **2a** (200  $\mu$ l, 0.04 M), 5 mol% Cu(PPh<sub>3</sub>)<sub>2</sub>BF<sub>2</sub>(OEt)<sub>2</sub> [**Cu-2**] (200  $\mu$ l, 0.002 M), 10 eq. TABMA **1a** (400  $\mu$ l, 0.2M), solvent – *i*PrOH, T = 25.0 °C.

| № | A <sup>307</sup> | t, sec | c, M   | lnC     |
|---|------------------|--------|--------|---------|
| 0 | 1,316            | 0      | 0,0095 | -4,6535 |
| 1 | 0,717            | 15     | 0,0052 | -5,2608 |
| 2 | 0,447            | 30     | 0,0032 | -5,7333 |
| 3 | 0,274            | 45     | 0,0020 | -6,2227 |
| 4 | 0,172            | 60     | 0,0012 | -6,6883 |
| 5 | 0,115            | 75     | 0,0008 | -7,0909 |

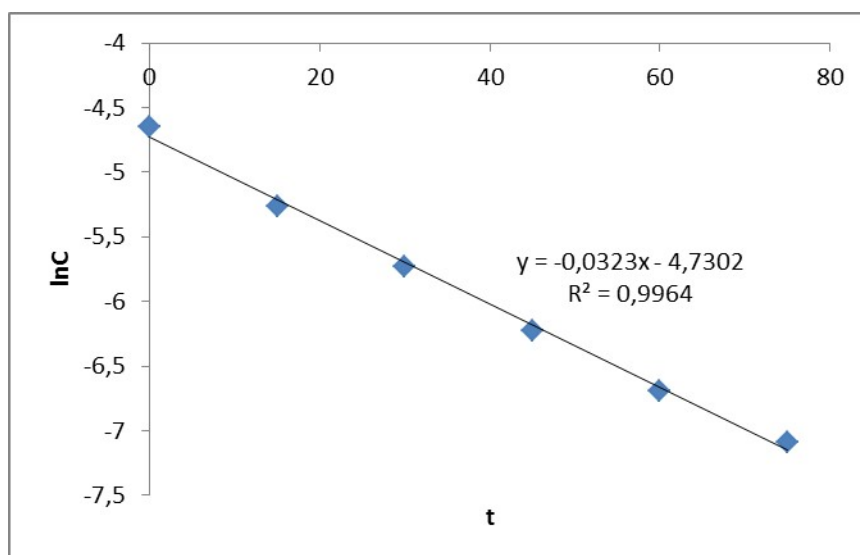

$$k_{\text{obs}} = 32.3 \pm 2.5 \times 10^{-3} \text{s}^{-1}$$

- *tris*-(Triphenylphosphine)copper(I)chloride\*acetonitrile [**Cu-3**]

Conditions of experiment: 2Br-4F-Ph Ellman's imine **2a** (200  $\mu$ l, 0.04 M), 5 mol% Cu(PPh<sub>3</sub>)<sub>3</sub>Cl\*MeCN [**Cu-3**] (200  $\mu$ l, 0.002 M), 10 eq. TABMA **1a** (400  $\mu$ l, 0.2M), solvent – *i*PrOH, T = 25.0 °C.

| № | A <sup>307</sup> | t, sec | c, M   | lnC     |
|---|------------------|--------|--------|---------|
| 0 | 1,384            | 0      | 0,0100 | -4,6031 |
| 1 | 1,361            | 15     | 0,0099 | -4,6199 |
| 2 | 1,291            | 30     | 0,0093 | -4,6727 |
| 3 | 1,247            | 45     | 0,0090 | -4,7073 |
| 4 | 1,207            | 60     | 0,0087 | -4,7399 |
| 5 | 1,137            | 75     | 0,0082 | -4,7997 |
| 6 | 1,082            | 90     | 0,0078 | -4,8493 |

|   |       |     |        |         |
|---|-------|-----|--------|---------|
| 7 | 1,030 | 105 | 0,0075 | -4,8985 |
| 8 | 0,982 | 120 | 0,0071 | -4,9462 |
| 9 | 0,965 | 135 | 0,0070 | -4,9637 |

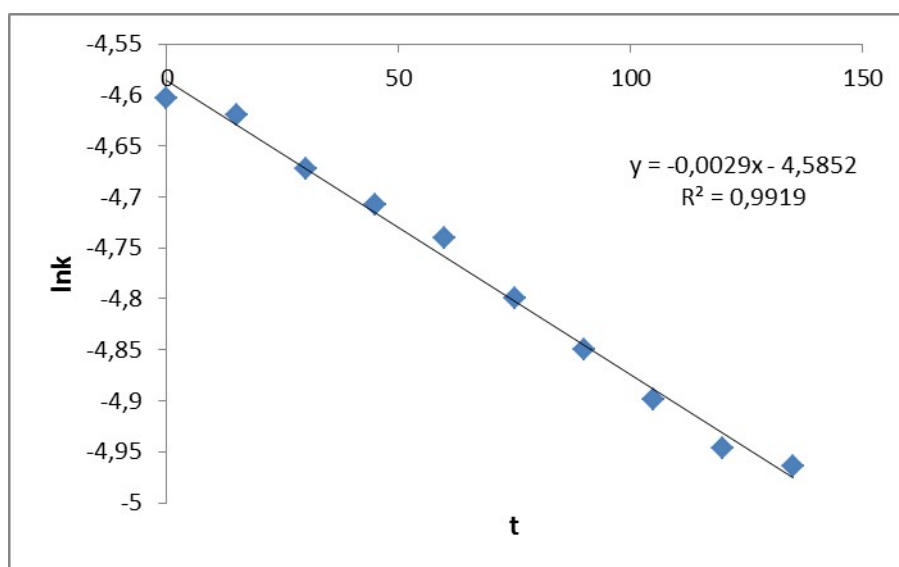

$$k_{\text{obs}} = 2.9 \pm 0.2 \times 10^{-3} \text{s}^{-1}$$

- **[1,3-bis(2,4,6-Trimethylphenyl)-2-imidazolidinylidene]copper(I)chloride [Cu-4]**

Conditions of experiment: 2Br-4F-Ph Ellman's imine **2a** (200  $\mu\text{l}$ , 0.04 M), 5 mol% (SiMes)CuCl [**Cu-4**] (200  $\mu\text{l}$ , 0.002 M), 10 eq. TABMA **1a** (400  $\mu\text{l}$ , 0.2M), solvent – *i*PrOH, T = 25.0  $^{\circ}\text{C}$ .

| N <sup>o</sup> | A <sup>307</sup> | t, sec     | c, M   | lnC     |
|----------------|------------------|------------|--------|---------|
| 0              | 1,385            | 0          | 0,0100 | -4,6024 |
| 1              | 1,303            | 15         | 0,0094 | -4,6634 |
| 2              | 1,212            | 30         | 0,0088 | -4,7358 |
| 3              | 1,100            | 45         | 0,0080 | -4,8328 |
| 4              | 0,998            | 60         | 0,0072 | -4,9301 |
| 5              | 0,903            | 75         | 0,0065 | -5,0301 |
| 6              | 0,114            | <b>900</b> | 0,0008 | -7,0996 |

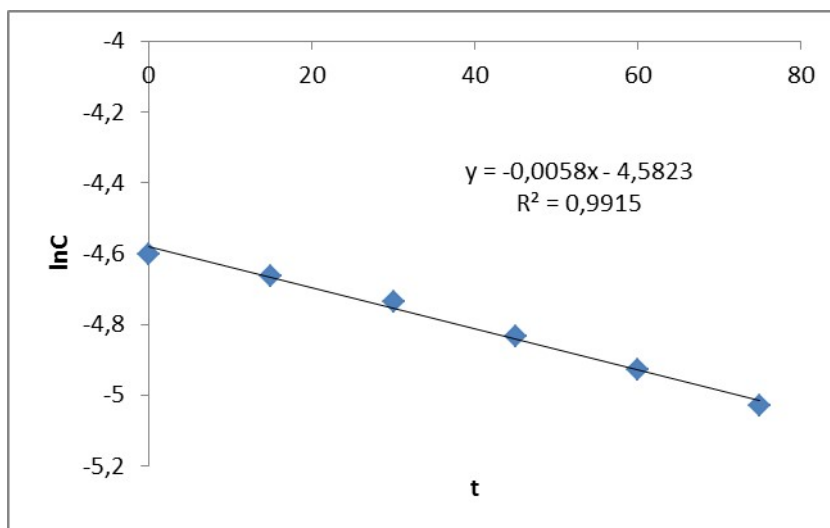

$$k_{\text{obs}} = 5.8 \pm 0.7 \times 10^{-3} \text{ s}^{-1}$$

- **bis(1,2-bis(diphenylphosphanyl)ethane)copper(I)tetrafluoroborate [Cu-5]**

Conditions of experiment: 2Br-4F-Ph Ellman's imine **2a** (200  $\mu\text{l}$ , 0.04 M), 5 mol% Cu(DPPE)<sub>2</sub>BF<sub>4</sub> [**Cu-5**] (200  $\mu\text{l}$ , 0.002 M), 10 eq. TABMA **1a** (400  $\mu\text{l}$ , 0.2 M), solvent – *i*PrOH, T = 25.0 °C.

| N <sup>o</sup> | A <sup>307</sup> | t, sec     | c, M   | lnC     |
|----------------|------------------|------------|--------|---------|
| 0              | 1,359            | 0          | 0,0098 | -4,6213 |
| 1              | 1,335            | 15         | 0,0097 | -4,6392 |
| 2              | 1,307            | 30         | 0,0095 | -4,6604 |
| 3              | 1,279            | 45         | 0,0093 | -4,6820 |
| 4              | 1,258            | 60         | 0,0091 | -4,6986 |
| 5              | 1,247            | 75         | 0,0090 | -4,7073 |
| 6              | 1,023            | <b>900</b> | 0,0074 | -4,9053 |

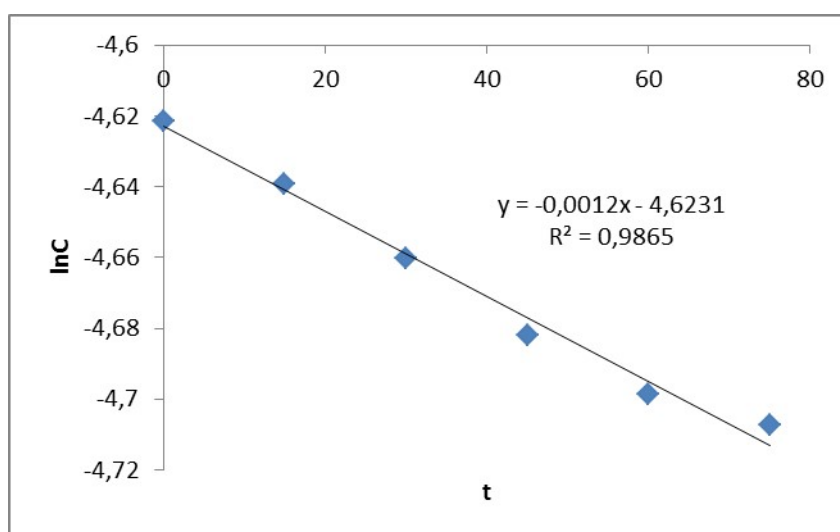

$$k_{\text{obs}} = 1.2 \pm 0.2 \times 10^{-3} \text{ s}^{-1}$$

- **Addition of 2 eq. of MeNH<sub>2</sub> to [Cu-5]-catalyzed allylation reaction**

Conditions of experiment: 2Br-4F-Ph Ellman's imine **2a** (200 μl, 0.04 M), 5 mol% Cu(DPPE)<sub>2</sub>BF<sub>4</sub> [**Cu-5**] (200 μl, 0.002 M), 10 eq. TABMA **1a** + 2 eq. MeNH<sub>2</sub> (400 μl, 0.2 M), solvent – *i*PrOH, T = 25.0 °C. MeNH<sub>2</sub> was added as 6 M solution in *i*PrOH.

| № | A <sup>307</sup> | t, sec     | c, M   | lnC     |
|---|------------------|------------|--------|---------|
| 0 | 1,403            | 0          | 0,0102 | -4,5895 |
| 1 | 1,316            | 15         | 0,0095 | -4,6535 |
| 2 | 1,286            | 30         | 0,0093 | -4,6765 |
| 3 | 1,191            | 45         | 0,0086 | -4,7533 |
| 4 | 1,141            | 60         | 0,0083 | -4,7962 |
| 5 | 1,111            | 75         | 0,0080 | -4,8228 |
| 6 | 1,054            | 90         | 0,0076 | -4,8755 |
| 7 | 1,024            | <b>900</b> | 0,0074 | -4,9044 |

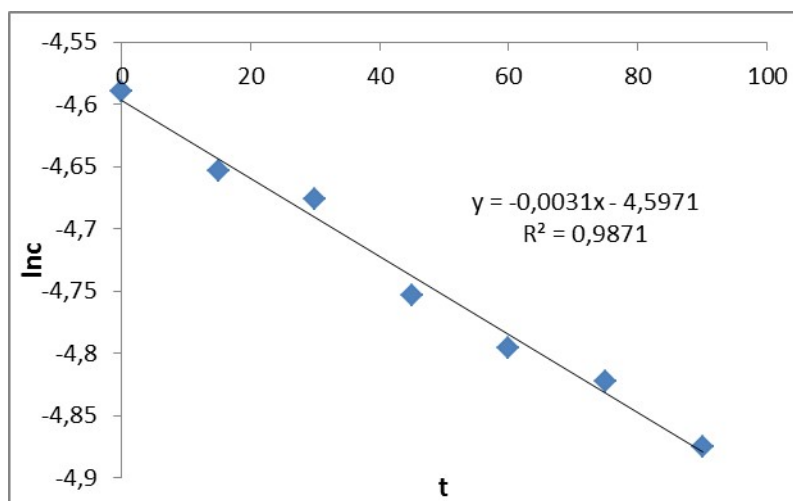

$$k_{\text{obs}} = 3.1 \pm 0.5 \times 10^{-3} \text{ s}^{-1}$$

- **Addition of 0.5 eq. of *t*BuOK to [Cu-5]-catalyzed allylation reaction**

Conditions of experiment: 2Br-4F-Ph Ellman's imine **2a** (200 μl, 0.04 M), 5 mol% Cu(DPPE)<sub>2</sub>BF<sub>4</sub> [**Cu-5**] (200 μl, 0.002 M), 10 eq. TABMA **1a** + 0.5 eq. *t*BuOK (400 μl, 0.2M), solvent – *i*PrOH, T = 25.0 °C.

| № | A <sup>307</sup> | t, sec     | c, M   | lnC     |
|---|------------------|------------|--------|---------|
| 0 | 1,348            | 0          | 0,0098 | -4,6295 |
| 1 | 1,006            | 15         | 0,0073 | -4,9221 |
| 2 | 0,713            | 30         | 0,0052 | -5,2664 |
| 3 | 0,466            | 45         | 0,0034 | -5,6917 |
| 4 | 0,311            | 60         | 0,0023 | -6,0960 |
| 5 | 0,233            | 75         | 0,0017 | -6,3848 |
| 6 | 0,145            | 90         | 0,0010 | -6,8591 |
| 7 | 0,031            | <b>900</b> | 0,0002 | -8,4019 |

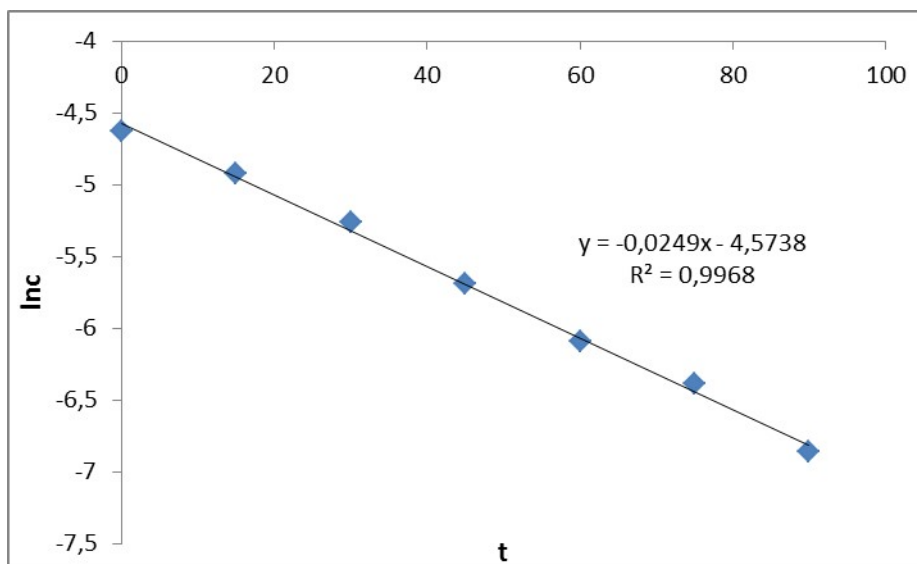

$$k_{\text{obs}} = 24.9 \pm 1.0 \times 10^{-3} \text{s}^{-1}$$

• **Addition of 0.5 eq. of *t*BuOK to [Cu-1]-catalyzed allylation reaction**

Conditions of experiment: 2Br-4F-Ph Ellman's imine **2a** (200  $\mu$ l, 0.04 M), 5 mol% Cu(PPh<sub>3</sub>)<sub>3</sub>F\*2EtOH [**Cu-1**] (200  $\mu$ l, 0.002 M), 10 eq. TABMA **1a** + 0.5 eq. *t*BuOK (400  $\mu$ l, 0.2M), solvent – *i*PrOH, T = 25.0 °C.

| Nº | A <sup>307</sup> | t, sec | c, M   | lnC     |
|----|------------------|--------|--------|---------|
| 0  | 1,435            | 0      | 0,0104 | -4,5669 |
| 1  | 0,983            | 15     | 0,0071 | -4,9452 |
| 2  | 0,697            | 30     | 0,0050 | -5,2891 |
| 3  | 0,461            | 45     | 0,0033 | -5,7024 |
| 4  | 0,304            | 60     | 0,0022 | -6,1188 |
| 5  | 0,212            | 75     | 0,0015 | -6,4793 |
| 6  | 0,155            | 90     | 0,0011 | -6,7924 |

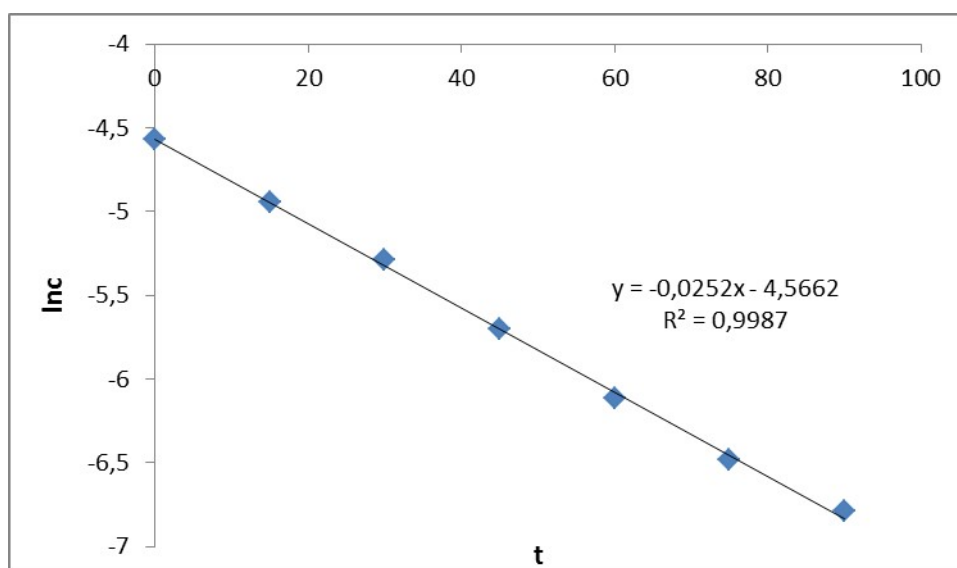

$$k_{\text{obs}} = 25.2 \pm 0.8 \times 10^{-3} \text{s}^{-1}$$

- **Addition of 2 eq. of *t*BuOK to [Cu-5]-catalyzed allylation reaction**

Conditions of experiment: 2Br-4F-Ph Ellman's imine **2a** (200  $\mu$ l, 0.04 M), 5 mol% Cu(DPPE)<sub>2</sub>BF<sub>4</sub> [**Cu-5**] (200  $\mu$ l, 0.002 M), 10 eq. TABMA **1a** + 2 eq. *t*BuOK (400  $\mu$ l, 0.2 M), solvent – *i*PrOH, T = 25.0 °C.

| N <sup>o</sup> | A <sup>307</sup> | t, sec     | c, M   | lnC     |
|----------------|------------------|------------|--------|---------|
| 0              | 1,228            | 0          | 0,0089 | -4,7227 |
| 1              | 1,065            | 15         | 0,0077 | -4,8651 |
| 2              | 0,892            | 30         | 0,0065 | -5,0424 |
| 3              | 0,738            | 45         | 0,0053 | -5,2319 |
| 4              | 0,681            | 60         | 0,0049 | -5,3123 |
| 5              | 0,548            | 75         | 0,0040 | -5,5296 |
| 6              | 0,489            | 90         | 0,0035 | -5,6435 |
| 7              | 0,104            | <b>780</b> | 0,0008 | -7,1886 |

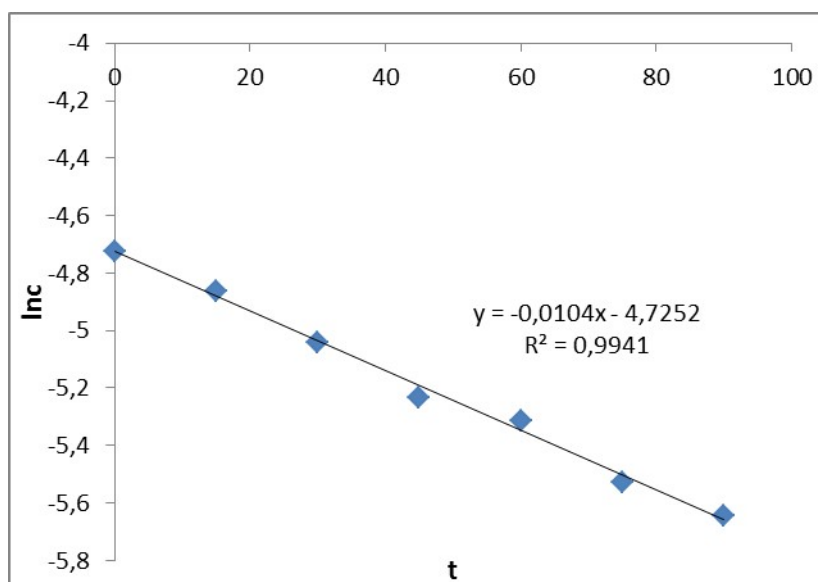

$$k_{\text{obs}} = 10.4 \pm 0.9 \times 10^{-3} \text{s}^{-1}$$

**Rate constants of [Cu-5]-catalyzed allylation of imine **2a** with triallylborane-methylamine adduct **1a** in isopropyl alcohol with addition of *t*BuOK (Figure 5 and Table 3 of the main text)**

- **Addition of 0.1 eq. of *t*BuOK**

Conditions of experiment: 2Br-4F-Ph Ellman's imine **2a** (200  $\mu$ l, 0.04 M), 5 mol% Cu(DPPE)<sub>2</sub>BF<sub>4</sub> [**Cu-4**] (200  $\mu$ l, 0.002 M), 10 eq. TABMA **1a** + 0.1 eq. *t*BuOK (400  $\mu$ l, 0.2M), solvent – *i*PrOH, T = 25.0 °C.

| N <sup>o</sup> | A <sup>307</sup> | t, sec | c, M   | lnC     |
|----------------|------------------|--------|--------|---------|
| 0              | 1,422            | 0      | 0,0103 | -4,5760 |
| 1              | 1,209            | 15     | 0,0088 | -4,7383 |

|   |       |     |        |         |
|---|-------|-----|--------|---------|
| 2 | 1,065 | 30  | 0,0077 | -4,8651 |
| 3 | 0,926 | 45  | 0,0067 | -5,0050 |
| 4 | 0,805 | 60  | 0,0058 | -5,1450 |
| 5 | 0,682 | 75  | 0,0049 | -5,3108 |
| 6 | 0,614 | 90  | 0,0044 | -5,4158 |
| 7 | 0,036 | 900 | 0,0003 | -8,2523 |

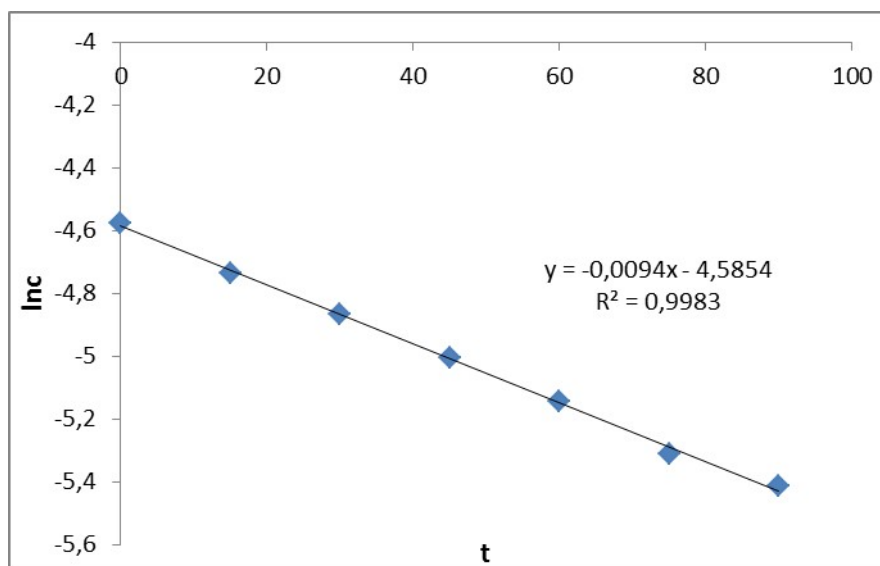

$$k_{\text{obs}} = 9.4 \pm 0.4 \times 10^{-3} \text{ s}^{-1}$$

- **Addition of 0.3 eq. of *t*BuOK**

Conditions of experiment: 2Br-4F-Ph Ellman's imine **2a** (200  $\mu\text{l}$ , 0.04 M), 5 mol%  $\text{Cu}(\text{DPPE})_2\text{BF}_4$  [**Cu-4**] (200  $\mu\text{l}$ , 0.002 M), 10 eq. TABMA **1a** + 0.3 eq. *t*BuOK (400  $\mu\text{l}$ , 0.2M), solvent – *i*PrOH, T = 25.0 °C.

| N <sup>o</sup> | A <sup>307</sup> | t, sec     | c, M   | lnC     |
|----------------|------------------|------------|--------|---------|
| 0              | 1,396            | 0          | 0,0101 | -4,5945 |
| 1              | 1,101            | 15         | 0,0080 | -4,8319 |
| 2              | 0,868            | 30         | 0,0063 | -5,0696 |
| 3              | 0,653            | 45         | 0,0047 | -5,3543 |
| 4              | 0,479            | 60         | 0,0035 | -5,6641 |
| 5              | 0,358            | 75         | 0,0026 | -5,9553 |
| 6              | 0,294            | 90         | 0,0021 | -6,1523 |
| 7              | 0,050            | <b>840</b> | 0,0004 | -7,9238 |

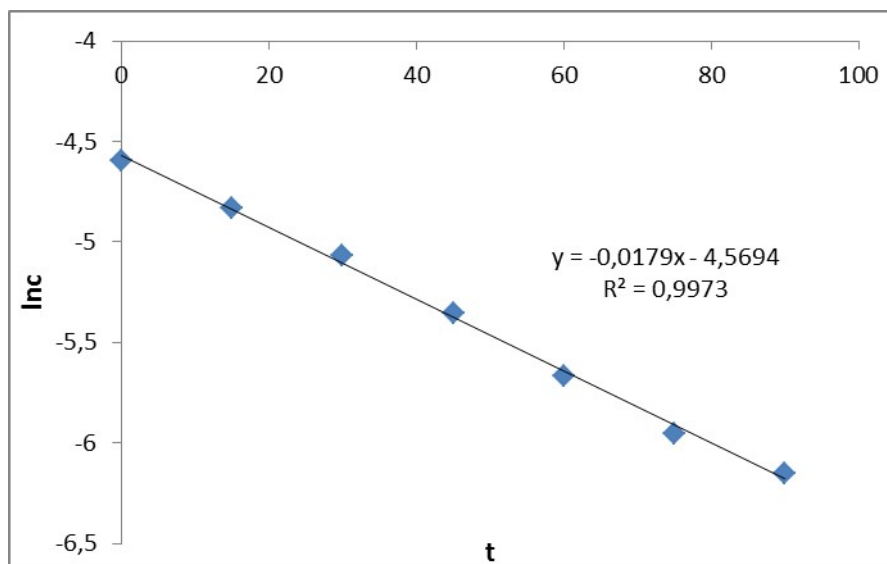

$$k_{\text{obs}} = 17.9 \pm 1.0 \times 10^{-3} \text{s}^{-1}$$

- **Addition of 0.4 eq. of *t*BuOK**

Conditions of experiment: 2Br-4F-Ph Ellman's imine **2a** (200  $\mu\text{l}$ , 0.04 M), 5 mol%  $\text{Cu}(\text{DPPE})_2\text{BF}_4$  [**Cu-4**] (200  $\mu\text{l}$ , 0.002 M), 10 eq. TABMA **1a** + 0.4 eq. *t*BuOK (400  $\mu\text{l}$ , 0.2M), solvent – *i*PrOH,  $T = 25.0 \text{ }^\circ\text{C}$ .

| Nº | A <sup>307</sup> | t, sec | c, M   | lnC     |
|----|------------------|--------|--------|---------|
| 0  | 1,409            | 0      | 0,0102 | -4,5852 |
| 1  | 0,857            | 15     | 0,0062 | -5,0824 |
| 2  | 0,630            | 30     | 0,0046 | -5,3901 |
| 3  | 0,452            | 45     | 0,0033 | -5,7222 |
| 4  | 0,341            | 60     | 0,0025 | -6,0040 |
| 5  | 0,259            | 75     | 0,0019 | -6,2790 |
| 6  | 0,223            | 90     | 0,0016 | -6,4287 |

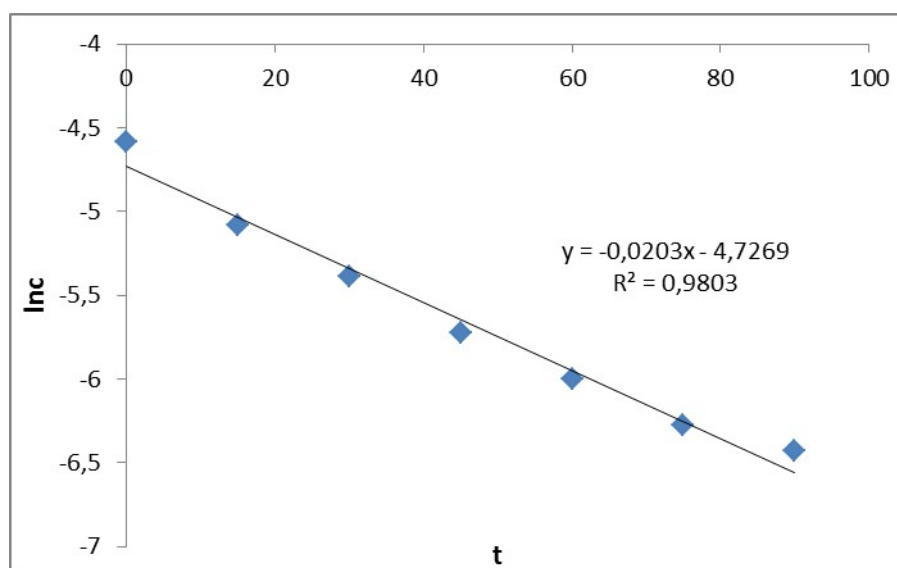

$$k_{\text{obs}} = 20.3 \pm 3.2 \times 10^{-3} \text{s}^{-1}$$



- **Addition of 1 eq. of *t*BuOK**

Conditions of experiment: 2Br-4F-Ph Ellman's imine **2a** (200  $\mu$ l, 0.04 M), 5 mol% Cu(DPPE)<sub>2</sub>BF<sub>4</sub> [**Cu-5**] (200  $\mu$ l, 0.002 M), 10 eq. TABMA **1a** + 1 eq. *t*BuOK (400  $\mu$ l, 0.2 M), solvent – *i*PrOH, T = 25.0 °C.

| N <sup>o</sup> | A <sup>307</sup> | t, sec      | c, M   | lnC     |
|----------------|------------------|-------------|--------|---------|
| 0              | 1,294            | 0           | 0,0094 | -4,6703 |
| 1              | 0,940            | 15          | 0,0068 | -4,9900 |
| 2              | 0,712            | 30          | 0,0052 | -5,2678 |
| 3              | 0,504            | 45          | 0,0036 | -5,6133 |
| 4              | 0,391            | 60          | 0,0028 | -5,8671 |
| 5              | 0,302            | 75          | 0,0022 | -6,1254 |
| 6              | 0,232            | 90          | 0,0017 | -6,3891 |
| 7              | 0,046            | <b>1080</b> | 0,0003 | -8,0072 |

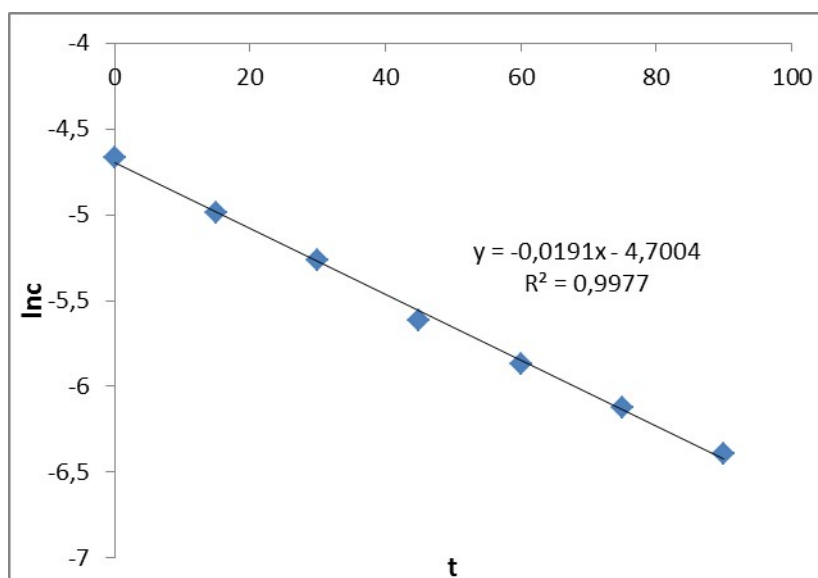

$$k_{\text{obs}} = 19.1 \pm 1.0 \times 10^{-3} \text{ s}^{-1}$$

**Rate constants of [Cu-3]-catalyzed allylation of imine **2a** with triallylborane-methylamine adduct **1a** in isopropyl alcohol with addition of *t*BuOK (Figure 5 of the main text)**

- **Addition of 0.1 eq. of *t*BuOK**

Conditions of experiment: 2Br-4F-Ph Ellman's imine **2a** (200  $\mu$ l, 0.04 M), 5 mol% Cu(PPh<sub>3</sub>)<sub>3</sub>Cl\*MeCN [**Cu-3**] (200  $\mu$ l, 0.002 M), 10 eq. TABMA **1a** + 0.1 eq. *t*BuOK (400  $\mu$ l, 0.2 M), solvent – *i*PrOH, T = 25.0 °C.

| N <sup>o</sup> | A <sup>307</sup> | t, sec | c, M   | lnC     |
|----------------|------------------|--------|--------|---------|
| 0              | 1,374            | 0      | 0,0099 | -4,6104 |
| 1              | 1,130            | 15     | 0,0082 | -4,8059 |
| 2              | 0,975            | 30     | 0,0071 | -4,9534 |
| 3              | 0,866            | 45     | 0,0063 | -5,0720 |

|   |       |     |        |         |
|---|-------|-----|--------|---------|
| 4 | 0,769 | 60  | 0,0056 | -5,1907 |
| 5 | 0,681 | 75  | 0,0049 | -5,3123 |
| 6 | 0,611 | 90  | 0,0044 | -5,4207 |
| 7 | 0,537 | 105 | 0,0039 | -5,5498 |
| 8 | 0,473 | 120 | 0,0034 | -5,6767 |

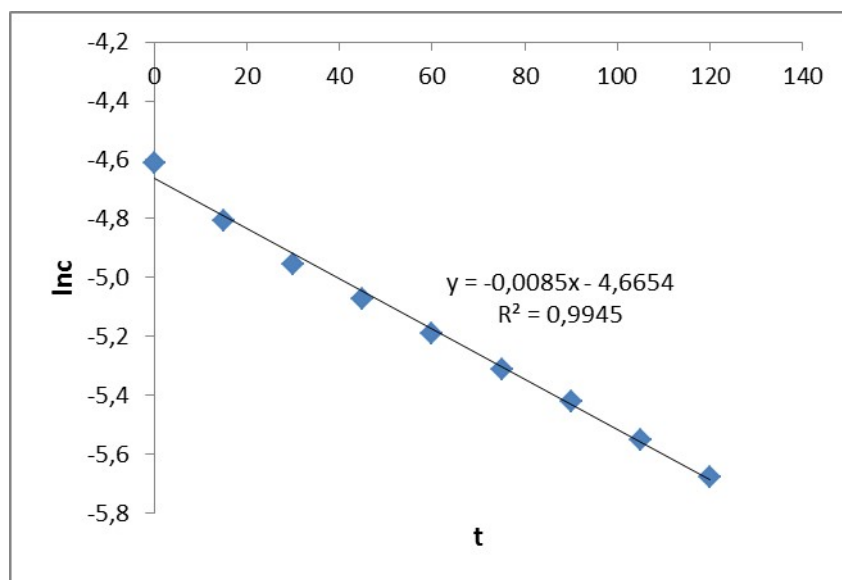

$$k_{\text{obs}} = 8.5 \pm 0.6 \times 10^{-3} \text{ s}^{-1}$$

- **Addition of 0.2 eq. of *t*BuOK**

Conditions of experiment: 2Br-4F-Ph Ellman's imine **2a** (200  $\mu\text{l}$ , 0.04 M), 5 mol%  $\text{Cu}(\text{PPh}_3)_3\text{Cl} \cdot \text{MeCN}$  [**Cu-3**] (200  $\mu\text{l}$ , 0.002 M), 10 eq. TABMA **1a** + 0.2 eq. *t*BuOK (400  $\mu\text{l}$ , 0.2 M), solvent – *i*PrOH, T = 25.0 °C.

| Nº | A <sup>307</sup> | t, sec | c, M   | lnC     |
|----|------------------|--------|--------|---------|
| 0  | 1,374            | 0      | 0,0099 | -4,6104 |
| 1  | 1,114            | 15     | 0,0081 | -4,8201 |
| 2  | 0,927            | 30     | 0,0067 | -5,0039 |
| 3  | 0,762            | 45     | 0,0055 | -5,1999 |
| 4  | 0,615            | 60     | 0,0045 | -5,4142 |
| 5  | 0,493            | 75     | 0,0036 | -5,6353 |
| 6  | 0,406            | 90     | 0,0029 | -5,8295 |
| 7  | 0,319            | 105    | 0,0023 | -6,0706 |
| 8  | 0,263            | 120    | 0,0019 | -6,2637 |

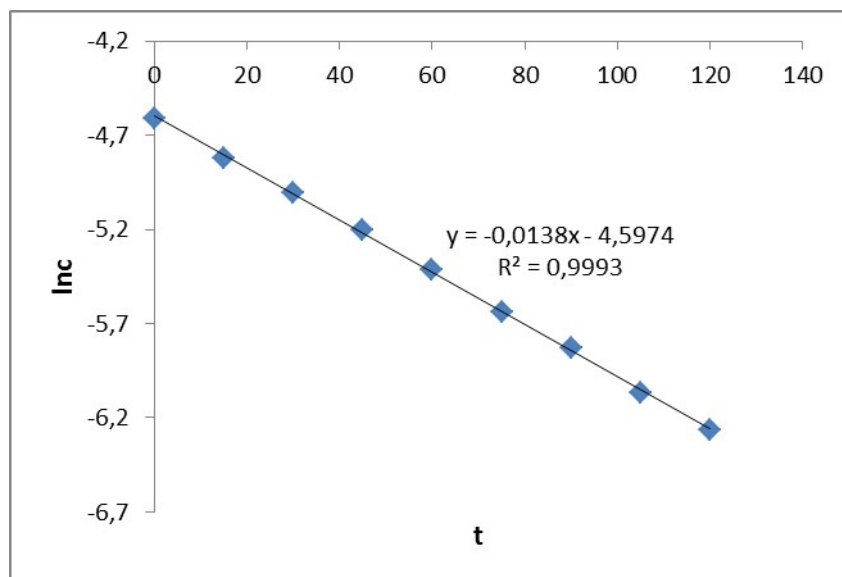

$$k_{\text{obs}} = 13.8 \pm 0.3 \times 10^{-3} \text{s}^{-1}$$

- **Addition of 0.5 eq. of *t*BuOK**

Conditions of experiment: 2Br-4F-Ph Ellman's imine **2a** (200  $\mu$ l, 0.04 M), 5 mol% Cu(PPh<sub>3</sub>)<sub>3</sub>Cl\*MeCN [**Cu-3**] (200  $\mu$ l, 0.002 M), 10 eq. TABMA **1a** + 0.5 eq. *t*BuOK (400  $\mu$ l, 0.2 M), solvent – *i*PrOH, T = 25.0 °C.

| N <sub>o</sub> | A <sup>307</sup> | t, sec | c, M   | lnC     |
|----------------|------------------|--------|--------|---------|
| 0              | 1,402            | 0      | 0,0102 | -4,5902 |
| 1              | 0,986            | 15     | 0,0071 | -4,9422 |
| 2              | 0,712            | 30     | 0,0052 | -5,2678 |
| 3              | 0,534            | 45     | 0,0039 | -5,5554 |
| 4              | 0,387            | 60     | 0,0028 | -5,8774 |
| 5              | 0,275            | 75     | 0,0020 | -6,2191 |
| 6              | 0,194            | 90     | 0,0014 | -6,5680 |
| 7              | 0,127            | 105    | 0,0009 | -6,9917 |
| 8              | 0,093            | 120    | 0,0007 | -7,3032 |

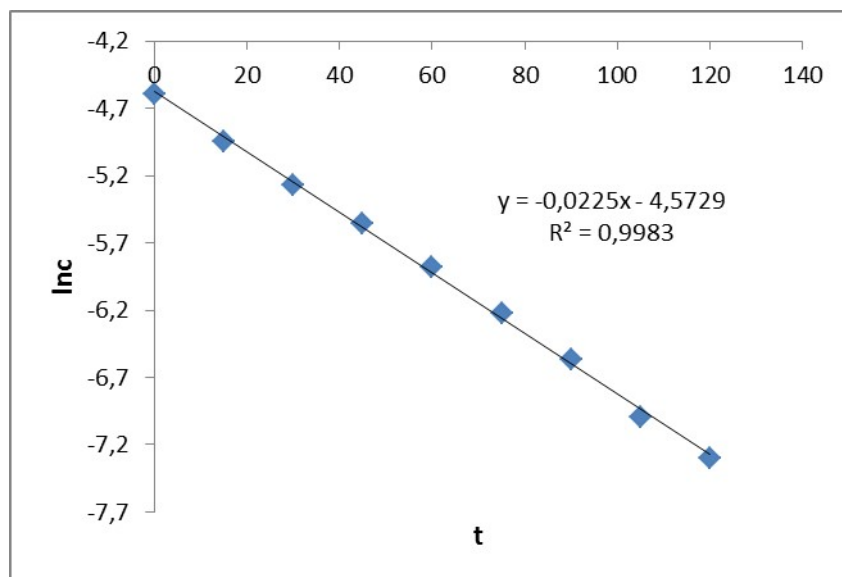

$$k_{\text{obs}} = 22.5 \pm 0.8 \times 10^{-3} \text{s}^{-1}$$

- **Addition of 1 eq. of *t*BuOK**

Conditions of experiment: 2Br-4F-Ph Ellman's imine **2a** (200  $\mu\text{l}$ , 0.04 M), 5 mol% Cu(PPh<sub>3</sub>)<sub>3</sub>Cl\*MeCN [**Cu-3**] (200  $\mu\text{l}$ , 0.002 M), 10 eq. TABMA **1a** + 1 eq. *t*BuOK (400  $\mu\text{l}$ , 0.2 M), solvent – *i*PrOH, T = 25.0 °C.

| N <sup>o</sup> | A <sup>307</sup> | t, sec | c, M   | lnC     |
|----------------|------------------|--------|--------|---------|
| 0              | 1,358            | 0      | 0,0098 | -4,6221 |
| 1              | 0,842            | 15     | 0,0061 | -5,1001 |
| 2              | 0,594            | 30     | 0,0043 | -5,4490 |
| 3              | 0,432            | 45     | 0,0031 | -5,7674 |
| 4              | 0,337            | 60     | 0,0024 | -6,0158 |
| 5              | 0,249            | 75     | 0,0018 | -6,3184 |
| 6              | 0,189            | 90     | 0,0014 | -6,5941 |
| 7              | 0,140            | 105    | 0,0010 | -6,8942 |
| 8              | 0,111            | 120    | 0,0008 | -7,1263 |

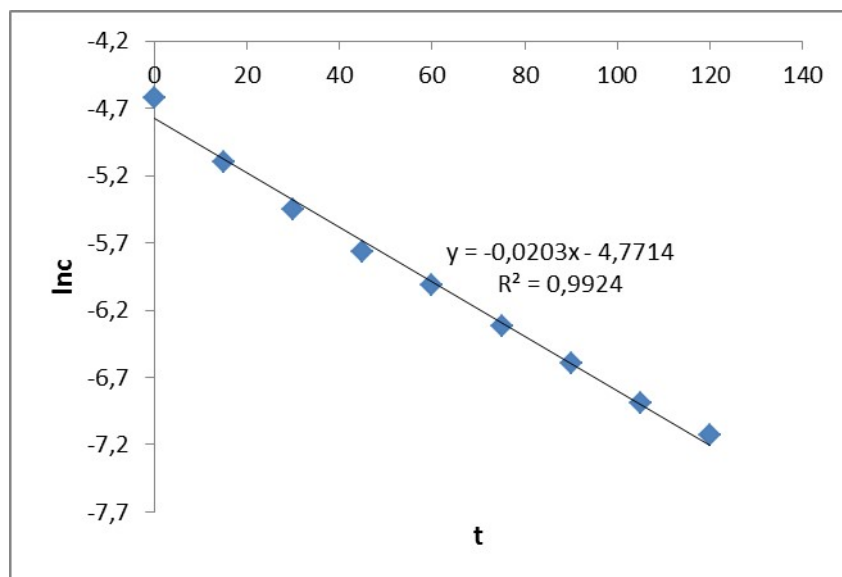

$$k_{\text{obs}} = 20.3 \pm 1.5 \times 10^{-3} \text{s}^{-1}$$

- **Addition of 2 eq. of *t*BuOK**

Conditions of experiment: 2Br-4F-Ph Ellman's imine **2a** (200  $\mu\text{l}$ , 0.04 M), 5 mol%  $\text{Cu}(\text{PPh}_3)_3\text{Cl} \cdot \text{MeCN}$  [**Cu-3**] (200  $\mu\text{l}$ , 0.002 M), 10 eq. TABMA **1a** + 2 eq. *t*BuOK (400  $\mu\text{l}$ , 0.2 M), solvent – *i*PrOH, T = 25.0 °C.

| N <sup>o</sup> | A <sup>307</sup> | t, sec | c, M   | lnC     |
|----------------|------------------|--------|--------|---------|
| 0              | 1,398            | 0      | 0,0101 | -4,5930 |
| 1              | 1,034            | 15     | 0,0075 | -4,8947 |
| 2              | 0,849            | 30     | 0,0061 | -5,0918 |
| 3              | 0,670            | 45     | 0,0049 | -5,3286 |
| 4              | 0,539            | 60     | 0,0039 | -5,5461 |
| 5              | 0,419            | 75     | 0,0030 | -5,7980 |
| 6              | 0,351            | 90     | 0,0025 | -5,9751 |
| 7              | 0,289            | 105    | 0,0021 | -6,1694 |
| 8              | 0,213            | 120    | 0,0015 | -6,4745 |

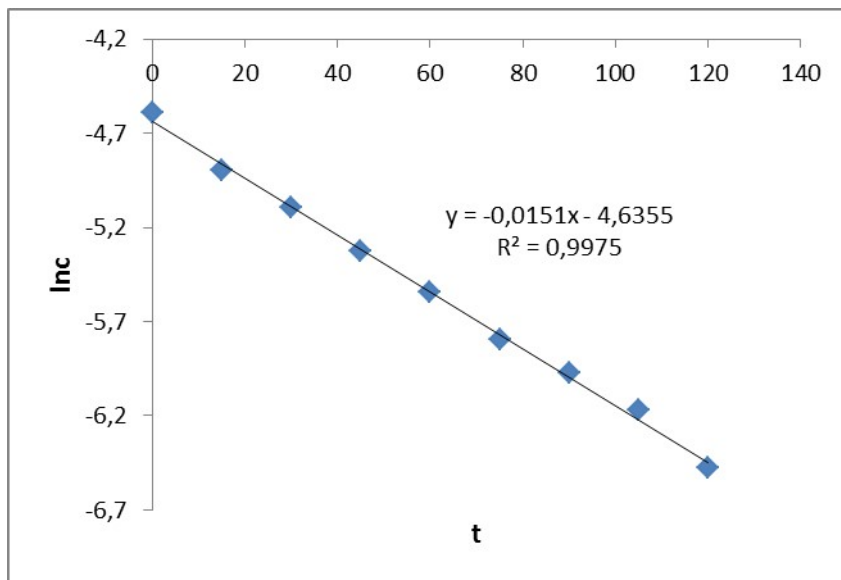

$$k_{\text{obs}} = 15.1 \pm 0.7 \times 10^{-3} \text{s}^{-1}$$
